# Supplementary material for: PGLYRP-1 mediated intracellular peptidoglycan detection promotes mucosal protection
Source: Research Square preprint supplement (doi:10.21203/rs.3.rs-5118704/v1), 2024-10-14
Supplement: Supplementary file 1 [file 068b095332ca1704770a6a9d.xlsx]

## Sheet: Supplemental table 6 heatmap_PG
	WT_GMTP	PG1_GMTP	NOD2_GMTP	GEFH1_GMTP
Bend6	0.113772	-1.47546	-1.6667	-0.697659
Arid5a	4.06961	3.46511	3.69097	4.01358
Serpinb2	0.468102	-3.3153	-0.907726	-0.0419531
Lad1	0.213335	-3.02878	-3.88156	-2.07651
Ptgs2	3.72934	0.761315	0.587438	0.176194
Slc2a6	7.17996	6.13398	5.91526	5.39693
Ralgds	6.22721	5.21549	5.31962	5.90853
Gpd2	5.0675	4.5462	4.60141	4.48027
Tcp11l1	4.30977	3.94635	3.62323	3.80723
Il1a	2.66592	0.76608	0.768896	-0.416918
Il1b	5.18082	0.200948	-1.11267	2.03134
Sdc4	7.26154	6.70341	6.46073	7.03627
Cd40	4.88779	3.95146	2.90021	3.3986
Siah2	3.88298	3.48879	3.52733	3.50088
Il12a	-2.03252	-6.17926	-6.31055	-5.86931
Tlr2	7.69898	6.67728	6.19342	6.76962
Pde4b	4.54204	3.80992	3.71787	4.30884
Stk40	5.14133	4.73659	4.58802	5.25277
Marcksl1	6.41002	4.7913	3.25886	5.51901
Lck	-0.0740639	-2.35817	-2.6451	-2.63989
Fgr	5.21605	5.03624	4.71592	4.60561
Sfn	2.44188	1.64263	1.90898	2.52263
Agrn	6.46482	5.71057	5.12761	5.73823
Il6	-1.00636	-5.28355	-7.89552	-5.09533
Cxcl3	-0.73663	-3.07829	-3.27037	-1.1869
Cxcl2	1.94401	1.24966	-0.254497	1.00439
Gfi1	-2.5377	-4.77558	-6.73455	-3.73284
Pilra	4.92675	4.49863	4.31225	4.16763
Nxpe5	5.86353	5.41927	5.24003	6.64959
Tfec	4.8359	4.36961	4.66611	4.5497
Tmem176a	6.34818	5.816	4.60417	6.63021
Tnip3	6.52094	5.76132	5.10114	5.80414
Clec4n	4.32476	3.70745	3.61247	4.50788
Clec4e	7.63769	4.88068	3.84952	3.89146
Tarm1	0.90371	-3.85733	-3.42279	-2.40671
Vasp	8.34832	7.88535	6.83809	7.75232
Ppm1n	1.0152	0.240758	-3.25166	-1.7462
Rtn2	1.45435	-0.0753896	-0.0907392	0.851276
Relb	5.95889	5.26034	5.04821	5.77776
Nectin2	4.60366	3.54364	3.78037	4.58356
Bcl3	5.63231	4.68322	4.24508	5.17355
Pou2f2	7.25261	6.70623	5.94957	6.87398
Spint2	0.810034	-0.882062	-1.7655	-0.403449
Il4i1	-5.22727	-6.86852	-4.19508	-4.4052
Saa3	7.92374	5.32101	3.78829	4.72317
Relt	2.29033	1.60092	1.67505	1.92602
Nrg1	-0.960411	-2.96936	-2.8354	-1.8189
Acsl1	7.82962	6.13303	5.92044	5.95048
Tma16	5.19992	2.94514	2.6631	3.04129
Ccl22	2.72038	0.0719355	-0.870379	-1.44954
Lcat	-1.43254	-2.26355	-2.77215	-2.43784
Hp	4.58072	2.6045	3.13328	3.22578
Casp4	6.05402	5.37643	5.03701	5.08487
Bcl2a1a	2.81184	0.54033	0.353994	0.107144
Ust	4.1336	3.56453	2.6405	4.07501
Txlnb	-0.334285	-2.32931	-5.14959	-1.23992
Sbno2	7.60478	6.95518	6.6814	7.50113
Efna2	-1.01341	-1.84264	-3.29937	-2.40071
Dram1	7.36542	6.37652	6.66097	6.03123
Lyz2	14.1979	13.8465	14.4515	14.1147
Il12b	3.34596	-2.38534	-4.21236	-2.71222
Nlgn2	3.60269	3.24185	2.93619	3.73823
Socs3	5.02797	0.669127	-0.0491403	2.28479
Nfkbia	6.78626	5.82761	5.25894	6.20244
Arg2	0.740857	-0.645776	-0.620053	0.567741
Susd6	8.50581	8.07825	7.9606	8.17438
Batf	3.16266	2.43295	2.41845	1.98049
Nfil3	3.90701	3.21326	3.73564	3.72899
Itga1	1.45515	0.126403	0.75719	-0.186162
Mmp14	8.1949	6.38392	5.27936	5.836
Acod1	8.262	5.83551	4.47983	3.5477
Ptger4	6.46352	5.37994	4.69618	5.54899
Trib1	5.09219	4.75121	4.10217	4.88923
Mapk11	0.861464	-0.1958	-2.20556	1.01267
Gpr84	2.82951	-0.202736	-2.43348	0.813961
Zfp263	6.85045	6.28932	6.0274	6.58238
Atf7ip2	-0.732954	-3.16808	-4.69082	-4.24998
Cebpd	4.62999	3.36864	2.94009	4.19433
Mir155hg	-2.18258	-4.13553	-5.94207	-5.58664
Pde10a	-1.45326	-3.27856	-2.69454	-4.81266
Sod2	7.83354	6.27345	6.14249	6.07908
Fpr1	2.03452	0.465123	-2.02037	1.10983
Fpr2	3.90455	1.80166	-0.704441	1.20853
Tnf	5.26775	3.56973	2.37007	2.98178
Ier3	3.43694	2.89417	2.57707	3.50243
Flot1	6.07262	5.66214	5.63753	6.25063
Nfkbie	5.57753	4.4008	3.61898	4.91146
Foxp4	4.56953	3.30756	3.74786	4.13821
Cd14	9.17685	7.79311	7.72208	8.92743
Cdc42ep2	3.08685	2.00846	2.00087	2.64371
Ehd1	7.02025	6.04628	5.28464	6.70684
Syt7	-1.60357	-4.13553	-7.89552	-5.09533
Fas	3.2512	2.40677	2.75572	2.4209
Nfkb2	7.03825	6.30301	6.06098	6.74875
Psd	3.31099	2.1352	2.10457	3.16382
Atrnl1	4.8659	3.8419	4.62813	5.0298
Cybb	11.7499	11.441	11.4866	10.9436
Gdpd2	-2.07108	-4.91507	-4.64162	-4.4052
