# Supplementary material for: PGLYRP-1 mediated intracellular peptidoglycan detection promotes mucosal protection
Source: Research Square preprint supplement (doi:10.21203/rs.3.rs-5118704/v1), 2024-10-14
Supplement: Supplementary file 2 [file 0eebea00f91a7cc1d46cf0e6.xlsx]

## Sheet: TabS11 heatmap analysis UC firs
	S17	S19	S22	S23	S26	S28	S1	S10	S2	S3	S5	S6	S8	S9	S11	S12	S13	S14	S15	S16
BDH2	-0.682474	0.195898	-1.34764	-1.70729	0.0595981	-1.87811	1.03348	0.825307	-0.503332	-0.237573	0.746076	-1.61123	-0.108481	1.17211	0.417249	0.819209	0.994283	1.27306	0.134768	0.405086
COX19	-1.05449	-1.09759	-1.21986	-0.808571	-1.60617	-1.75399	1.40944	-0.048937	0.829261	0.442768	0.633545	-0.0805051	-0.064607	0.0368242	0.00570443	1.03091	1.42246	1.41151	0.697434	-0.185126
PNPLA7	-1.3063	-0.559139	0.782891	-1.99949	-1.50577	-1.92007	0.691726	0.182869	0.303435	0.962547	0.864658	0.515895	1.18378	0.219484	-0.281685	0.513442	0.680942	-0.493242	-0.00743999	1.17145
ADHFE1	-1.27696	0.357296	-0.0560788	-2.57105	-0.0675092	-1.37635	0.781485	-0.026136	0.08696	0.631018	1.54518	-1.31179	0.967239	-0.31715	-0.0643668	-0.122056	1.1439	0.109269	0.79631	0.770787
IL11RA	-1.4913	0.809798	-0.21509	-1.50536	-0.906063	-1.95402	0.567781	-0.94368	-0.139569	1.18942	0.820168	-1.01528	-0.0296282	0.479556	0.261105	1.03905	0.823917	0.438323	0.178116	1.59274
PABPN1	-0.169905	-1.01665	-0.210259	-1.82652	-0.720606	-1.24097	0.91271	-1.3455	0.761755	-0.894878	2.43464	0.617136	0.360043	-0.297019	-0.0712929	-0.00316906	0.520034	0.680759	0.569526	0.940172
HYPK	-0.0239439	-0.739633	0.743654	-1.59457	-1.21079	-2.05507	-0.469715	-0.359982	0.148328	0.264774	1.68895	-0.293616	-0.211748	-0.727757	0.83972	0.0391411	0.874177	1.43601	0.188013	1.46406
RPAIN	-0.156862	0.581142	0.730622	-1.15068	-1.3152	-1.55091	0.706836	-1.18067	-0.781199	-0.65487	1.85473	-0.374835	-0.609354	-0.910787	0.276074	0.81935	1.32173	0.97258	0.221907	1.2004
DNAH11	0.538635	-0.0875376	0.575389	-1.60814	-0.285298	-1.62003	1.26843	-1.02889	1.13012	0.693972	0.221507	0.0225153	-2.35312	0.643661	1.0101	0.479356	0.0924508	-0.54258	-0.182721	1.03218
PTGR2	0.609923	-1.14782	0.429769	-1.28079	-0.524826	-2.37123	0.180794	-1.42569	-0.533272	0.731597	0.794294	-0.203145	0.144092	-0.152978	0.447489	1.224	1.08441	0.385202	-0.109722	1.7179
ZNF397	0.790797	0.332848	1.15901	-1.387	-0.231445	-1.37966	1.18295	-1.77178	-0.862028	0.203489	0.0603236	-1.03651	-0.809438	0.467453	-0.349611	1.01769	1.2477	0.422896	-0.630551	1.57286
MATR3	-0.0383496	1.01632	0.109336	-1.23625	0.518813	-1.54468	0.814445	-1.7486	-1.46745	-0.23977	1.14795	0.0678073	0.227414	-0.0740355	0.489758	0.845257	1.45389	-0.768656	-0.950371	1.37716
NR2C1	0.403486	0.87214	0.0460141	-0.619706	-0.226705	-2.30427	-0.548561	-1.05944	-1.23173	-0.755788	1.17	1.09763	-0.387725	0.216095	1.35073	0.251665	0.814086	0.310159	-0.967712	1.56963
LPP	0.0614961	0.84062	-1.01509	-0.102728	0.553542	-3.39511	1.0573	-0.958135	0.414628	0.174961	-0.0964065	0.712163	0.841997	0.286233	-0.497435	-0.301161	0.349297	0.196296	-0.263353	1.14088
PTGDR2	0.347778	2.04123	-0.538239	-0.78645	-0.33085	-3.23233	0.522129	0.0160583	0.113585	-0.893083	1.05306	0.166268	0.229959	0.198988	0.320188	0.2437	0.0363059	0.842374	-0.180298	-0.170369
HPCAL1	-0.46715	2.46781	0.107056	-0.503088	-1.98904	-1.20956	-0.859963	-0.238726	0.132927	0.668217	1.05886	0.561637	0.439019	-0.945838	-0.224896	-0.317107	-0.783134	1.32112	-0.060551	0.842409
AGL	0.151772	0.0987484	-1.09554	-1.20781	-1.28785	-2.68422	1.29706	1.34998	0.0481542	0.950441	0.832404	0.224337	-0.774819	1.03489	0.0864454	-0.124875	0.460603	0.180191	-0.120678	0.580774
FIG4	0.165769	-0.462352	-0.43598	-0.243837	-1.53214	-2.65407	1.05357	0.991344	0.351733	0.369468	1.85575	0.291874	0.0453139	0.848014	-0.861274	-0.611546	-0.724313	0.734304	0.406873	0.411488
DGLUCY	-0.0829415	-0.875971	-0.557654	-0.449087	-1.82946	-2.83548	0.896426	0.500991	-0.189349	0.47089	0.944966	-0.343787	-0.158113	0.6216	0.133201	0.585005	0.400912	1.31909	0.349243	1.09951
GSE1	-0.43233	-0.990035	-0.420124	-0.252353	-2.40243	-2.50176	0.20431	0.363626	0.274898	0.165846	1.01995	0.671237	0.359567	0.570432	0.287388	0.0842643	0.382448	0.865681	0.232762	1.51662
TRMT2B	-0.544864	0.203004	0.509708	-0.306191	-2.32419	-2.79437	0.541849	1.06735	0.784867	1.0521	0.0642902	0.139904	-0.377413	1.11735	-0.129702	0.221639	0.570231	0.0618175	0.318809	-0.176195
CEP85	-0.723182	-0.786471	-0.390822	0.0846057	-1.75275	-2.83496	0.438847	0.448293	0.60624	0.526409	0.454766	0.793991	-0.653607	1.26523	0.158465	0.0891706	0.83222	-0.112899	0.171458	1.385
KSR2	0.00816052	-0.166275	0.599527	-0.151366	-1.80825	-3.39856	-0.0348352	-0.03764	0.740796	0.462396	1.05815	0.702321	0.27537	0.480127	-0.115686	-0.357074	0.266459	0.391177	0.286007	0.799199
DNAH6	0.568587	-0.188721	0.315333	-1.73611	-1.01917	-1.9592	1.38445	1.2976	-0.0367319	0.261828	-0.927104	0.0902215	-0.499806	0.421636	-0.0928581	-1.29612	0.00951282	1.42191	0.943491	1.04124
SLC45A3	-0.126385	0.0100408	-0.167132	-1.3423	-0.216642	-2.96923	0.467899	0.0601592	1.43727	0.652095	0.395377	0.909006	-0.373111	1.06606	-1.38089	0.526308	-0.535882	0.468662	0.522477	0.596216
LFNG	-0.845874	-0.314658	-0.883921	-1.11508	-1.36432	-1.5738	0.721038	1.21036	1.0509	1.92495	-0.125336	-0.281183	-1.05317	0.439211	-0.535637	0.233136	-0.0171116	0.0286495	0.968925	1.53291
ING4	-0.257514	-0.0254322	0.424609	-2.01778	-0.794124	-1.98518	0.413351	1.45013	0.200674	1.71935	0.69192	-0.2034	-0.0538967	0.163512	-1.7022	0.188131	-0.0762295	0.655186	0.295346	0.91356
ARID1B	1.64763	0.189865	1.17441	1.1871	-1.57219	-1.47261	-0.0520333	0.52376	-0.0899919	0.927127	0.864755	-1.209	-0.950185	-0.11417	-0.724208	-0.341697	-0.747146	1.49404	-1.01901	0.28355
ATL1	1.12015	-1.22222	0.447029	1.68329	-2.2385	-0.972707	-0.707113	1.07538	0.282571	0.181617	1.11432	-1.34316	-0.436192	0.557719	-0.0246087	0.399678	-0.171616	0.765636	0.464777	-0.976069
IMPACT	0.342676	-0.46371	-1.15299	-0.0453106	-1.39191	-1.29412	0.711754	1.75512	-0.122398	0.960637	-0.709808	-1.63778	-0.547046	-0.00856487	-0.0961719	0.351071	0.124724	1.85779	1.45149	-0.0854509
CDCA7L	0.87531	-0.442547	1.16778	-0.110731	-2.19882	-1.98195	0.017865	0.349149	0.147342	0.361348	0.574168	-1.51261	-0.980733	0.303276	1.09601	-0.0660977	0.0417569	1.52822	0.595632	0.235636
URI1	-0.291685	-1.09729	0.28911	-0.765706	-1.084	-2.11977	0.858699	0.807633	-0.406614	1.142	0.914562	-0.890788	-1.00557	-0.0677974	0.731489	1.07815	0.227707	1.73423	0.717575	-0.771931
PRKX	-0.0386277	-0.681309	-0.173298	-0.954244	-1.40578	-0.94535	1.05659	-0.0637742	1.30409	-0.0919136	-0.139911	-1.40858	1.01457	2.17067	1.14398	-1.28601	-0.26381	0.274299	-0.435073	0.923469
PAGR1	-0.21707	-0.296296	-0.592972	0.403532	-1.40104	-2.25311	-1.35535	0.778572	0.667435	0.297064	0.200154	0.0294821	1.54895	1.11494	0.739239	1.26713	0.104008	-0.582822	-1.23747	0.785615
E2F2	0.562185	-1.318	-0.0101934	0.707969	-2.38029	-1.18189	-0.192151	0.678557	0.965063	-0.455252	-0.446684	0.888203	1.10021	1.06594	1.23482	-0.0794338	0.0138926	0.888921	-0.967414	-1.07444
ZNF462	0.519409	-2.18284	-0.93523	0.23179	-1.37087	-1.878	0.175614	1.31118	-0.679936	0.0222571	0.123058	0.0105185	1.50089	0.813004	0.799902	0.000819008	-0.443884	1.02248	0.209577	0.750268
MADD	-0.683024	-1.5567	-0.0910073	-0.0337334	-0.462203	-1.30233	0.535543	2.0829	2.01277	0.891657	0.157736	-0.0802189	0.0991775	-1.44369	0.15332	-0.290167	-0.777312	0.529335	-0.756658	1.0146
KANSL1	0.807066	0.207745	-0.629626	0.202491	-0.716149	-1.59259	0.456834	2.10716	0.499145	1.4668	-1.86166	0.601537	-1.35308	-0.755594	-0.531376	0.116335	0.768635	-0.0358946	-0.436852	0.679073
BMP2K	-1.34006	0.00910448	0.992424	-0.015617	-0.938476	-1.23225	-0.323275	2.21562	0.0711596	0.839384	-0.782261	0.0451263	0.256768	0.701233	0.208639	-1.01647	1.13334	-1.87734	0.0339599	1.01899
ZNF317	-0.461236	0.280988	0.786169	0.807446	1.23598	-0.383037	0.846026	2.71698	0.212638	0.307449	-0.702706	-0.492915	-0.792552	-0.428943	-0.565072	-0.110007	0.626915	-0.935009	-1.35158	-1.59753
METTL8	-0.631404	1.73702	0.408881	-0.344491	0.350271	-1.57591	1.3679	0.617296	-1.4353	0.0506082	-0.737352	-0.743471	-1.32933	-1.0338	1.4947	0.918113	-0.388408	-0.217964	0.912888	0.579763
CD200R1	0.192043	1.1247	0.247116	-1.25632	0.272593	0.364638	0.133522	0.365064	1.34682	-0.110562	-1.78818	-2.22383	0.857594	-1.3091	0.308725	0.702221	1.48014	-0.254049	0.18306	-0.636199
ASIP	0.121027	1.3039	1.16056	-1.91916	0.0605858	-0.436633	0.108271	-0.653119	0.781561	1.31619	0.987319	-1.72621	0.402705	-1.86454	-0.170093	-0.812818	0.697995	-0.261832	0.326	0.578291
GSTM5	0.992797	2.38569	-0.268565	-0.754594	1.61063	-0.982774	0.22782	0.239539	-1.36847	-0.933115	-0.893173	-1.56986	0.31181	0.968511	-0.312917	0.18153	0.271236	-0.455203	-0.324754	0.673859
SPACA9	0.844166	2.27842	-0.115477	-0.316088	1.37484	-1.38745	0.207421	0.236291	0.00490381	0.0815724	0.64946	-0.966292	0.0461079	1.34233	-2.22948	-0.333298	-0.433857	-0.568983	-0.521306	-0.193275
MYLK	1.08603	1.28637	-0.297916	-0.412026	2.42753	-1.2436	-0.291597	0.709232	0.531168	0.670504	-1.28063	0.826295	-0.200371	0.0827566	-1.14874	-0.707828	-0.608117	-1.60029	0.00712844	0.16411
FZD1	0.324645	0.273104	-1.68683	-0.701716	2.28835	-0.994134	0.400899	0.280772	0.341145	0.406838	-1.89742	-0.362025	-0.29585	0.902092	-0.719447	0.644377	0.56792	-0.573385	1.44884	-0.648173
TNKS	2.18059	-0.543295	0.56456	1.30927	0.247353	-1.25532	-0.132765	1.29599	-0.535625	0.812398	0.713721	-0.214094	-1.30761	-0.17975	-0.952285	-1.06201	-0.246897	-0.641636	-1.21577	1.16318
POLR2A	1.04466	0.586065	0.738019	1.10985	-0.000785266	-1.34054	-0.292701	1.57091	1.10598	0.881958	-1.1877	0.0095859	0.0625256	0.134506	-2.13967	-1.14909	-0.210746	-1.16529	-0.459394	0.701855
KAT6B	0.577401	0.570768	-0.778177	-0.621508	0.746223	-1.05521	0.0225038	1.17734	0.637272	1.00509	0.445776	1.01459	-1.49635	0.485174	-1.60626	-1.49779	-1.41584	-0.243833	1.34767	0.685165
AHNAK	0.391765	0.448885	-0.763468	0.18025	0.556873	-0.949493	-0.65694	-0.268229	1.94687	0.442323	0.84419	1.796	0.229754	-0.713745	-1.3144	-0.741504	-0.298445	-1.82839	-0.619422	1.31712
TCF12	2.50598	-1.22104	1.10182	-0.257632	0.644033	-1.1404	0.114819	1.01968	-0.0020714	0.0175631	-0.287758	0.699677	-1.77612	0.304098	-0.925582	-0.516142	-0.305389	1.14835	-0.873504	-0.250396
ACSS1	1.24842	0.00815797	0.614239	-1.34079	-0.0253815	-1.60417	0.246797	0.549932	0.361514	0.586509	0.210672	2.29663	-0.945036	-0.678936	-1.56998	0.546464	-0.62889	1.10071	-0.89692	-0.079947
ALMS1	0.267968	0.704843	0.694256	0.314717	0.333827	-3.4199	-0.698425	0.597057	0.408783	1.0014	-0.23328	-0.913666	-0.595957	0.776494	0.0230252	0.0103205	0.292373	0.476426	-0.986514	0.946252
ADCY2	1.52408	1.03257	0.302005	1.04982	1.28565	-3.02302	-0.830482	-0.636077	0.623883	0.501893	-1.17926	-0.242328	-0.204184	0.205794	-0.231897	-0.33304	-0.139232	0.274387	-0.211325	0.230762
NFIX	1.34538	0.849654	-0.327092	-0.0936827	1.17027	-3.22884	-0.647741	0.800319	0.339637	0.930075	-0.249952	-0.794173	-0.171675	0.0300055	-0.300974	-0.821112	-0.388802	0.698319	0.331317	0.529067
REV3L	1.73034	-0.15261	0.0594915	-0.393712	2.12777	-0.890242	0.0629397	-1.04001	-0.689523	1.04013	0.661515	-1.56047	-0.878066	0.565911	-1.1058	-0.896638	0.349904	0.700929	-0.623554	0.931702
CAB39L	0.329567	1.42786	-0.742175	-0.606781	1.84246	-1.68803	-0.441954	-0.710424	-0.149631	1.61437	0.323664	-0.131798	-0.472467	-0.507271	-0.742273	-1.28005	0.627155	1.33339	-0.848604	0.823005
IL1RL2	-0.457793	-2.23863	-0.594713	1.33728	-1.0022	-0.358036	0.292206	1.05982	-1.29779	-1.60414	1.33646	0.278155	0.0623797	0.247952	1.38364	0.395232	0.376435	0.342033	0.804994	-0.363305
NFE2L2	-0.88525	-1.17997	-1.26943	-0.335779	-1.10482	2.51489	-0.144593	0.411481	-0.382253	-1.04226	0.329543	0.183131	0.66129	1.32389	0.886085	-0.249954	0.468853	0.830055	0.366708	-1.38161
CACUL1	0.702554	-2.39755	-0.777362	1.27964	-0.841741	2.1721	-0.218829	0.690144	-0.614592	-0.575998	0.127693	-0.0483826	0.671477	0.608266	-0.145701	-1.57524	-0.175266	0.582857	0.264892	0.271041
KREMEN1	0.638651	-2.32875	-0.767573	-0.152574	-0.335287	1.4956	0.15894	0.674159	0.483179	-1.75691	1.06541	-0.847344	0.369878	-0.104976	-0.09878	-0.569702	0.467516	1.72858	0.595129	-0.71515
TRIB1	0.353834	-0.808849	0.118342	0.0396526	0.149274	1.13369	-1.55712	0.396443	-0.856134	-0.0479635	2.55982	-0.273773	1.15749	-0.210883	-0.310454	-1.57067	-0.553364	0.365834	-1.17427	1.08911
FOS	0.949776	-1.63742	0.0916507	-0.372352	-0.361341	0.762096	-1.31417	0.837159	-1.65708	-0.0182121	0.223799	-0.178583	1.54111	0.681664	0.178189	-1.57302	-0.304201	1.50484	-0.510821	1.15691
ZFP36	0.412618	-1.43165	-0.0178249	-0.373604	-0.523671	2.77435	-1.20382	0.0315442	-0.826524	-0.591692	0.3333	-0.147303	1.49627	-0.0435972	-0.23735	-1.03668	0.1073	1.16618	-0.751149	0.86331
MARCKSL1	0.0250176	-0.754562	-0.114192	0.745016	-1.3643	0.864063	-0.633204	1.44549	-0.137322	1.99628	0.904609	-0.278906	-0.742603	-0.739483	0.0515177	-0.575939	-1.21883	1.95409	-0.946896	-0.479836
FBXO28	0.0531075	-1.17111	-1.38404	1.54612	-1.24794	1.12101	-0.287979	1.03937	-0.832208	0.655661	0.705051	1.17953	0.656654	-0.00406504	-0.345414	0.239983	-1.09367	1.29706	-1.6033	-0.523808
THBS1	-1.04531	-1.67924	-0.946956	-1.07663	0.681559	1.59554	-0.602287	1.0411	0.116693	-0.0789061	1.85545	-0.00402123	0.458032	-0.240626	-0.76618	-0.128864	-0.311554	0.779564	-1.14161	1.49425
GPR157	-1.13143	-1.12481	-0.454473	0.0746519	-1.09147	2.80507	0.659113	0.522979	0.50622	0.00116762	0.946447	0.742491	-0.590412	0.188987	-1.09354	-0.893414	-0.335711	1.15191	-0.972517	0.0887431
SOAT1	-1.34174	-2.3641	-0.291426	-0.437987	-0.612026	1.59976	-0.467572	0.628689	0.328921	1.20297	0.95052	0.532602	-0.510914	1.41875	-0.421319	-0.928951	-0.389338	1.09487	-0.431259	0.43954
GPR137	-0.677022	-0.112298	-0.637295	0.150326	-0.0424172	1.20782	1.7308	1.19395	0.778024	0.140639	-0.544622	1.03672	1.31036	0.925146	-0.668191	-0.667707	-1.49523	-1.46998	-1.20099	-0.958028
MEN1	0.599266	-0.606946	-0.704271	-0.618429	0.571959	0.664716	0.637156	0.44159	0.104599	0.969802	0.589971	-0.412106	2.16777	1.35286	-0.227201	-1.67639	-1.57529	0.0280493	-1.05425	-1.25285
GALNS	-0.181068	0.08553	-1.24064	-0.27897	-1.36659	0.852044	0.92086	0.450539	-0.396498	-0.693012	2.23204	0.714231	0.263163	1.56137	-0.597783	-0.391193	-0.0112879	-1.14187	-1.60337	0.8225
EIF4A2	0.388249	-0.953408	-1.14197	-1.14734	-1.92825	-0.466773	0.955833	1.64085	-0.57944	0.190637	1.64207	0.180835	1.43716	0.513981	-1.05064	0.440565	-0.372245	0.820467	-0.478331	-0.0922345
VIPAS39	2.17455	-0.308678	-0.187986	-1.62663	-0.739938	-0.485051	1.01898	1.26692	-0.494973	-0.203937	0.228098	0.954507	1.11662	0.925491	-1.46232	0.122828	-0.798827	-1.29489	0.233952	-0.438713
PACRG	-0.380455	-0.221115	-2.80087	-0.255283	1.35945	0.795416	0.437401	-0.17231	-1.30899	1.0869	-0.710234	0.894312	0.145187	0.822082	0.788985	1.11346	-0.705771	-0.293845	-0.878203	0.283875
HEY1	-0.228113	-0.470698	-2.89648	-0.0891844	1.46792	1.30627	-0.162796	1.54488	-0.325995	-0.651172	0.0838124	0.0417865	-0.377627	0.525686	-0.709661	-0.734128	1.16709	-0.286336	0.0138905	0.780842
TBC1D9B	0.191283	-2.35581	-0.454609	1.3285	0.25593	-0.303467	-0.386892	1.00827	-0.422468	1.20545	-0.114456	1.54068	0.308817	0.833775	-1.41473	-0.229529	-1.37093	-0.733161	0.226327	0.887021
ZFAND2A	0.627989	-1.83588	-0.44747	0.362275	0.156937	1.04886	0.490958	1.74253	-0.0311807	-0.260383	-0.744571	2.27883	0.553445	-0.104849	-0.709939	0.202975	-1.60281	-0.246538	-0.959764	-0.52141
PRELID1	-0.223678	-1.13993	-0.978176	0.892485	0.00451312	0.697521	-0.137248	1.80631	-1.69768	-0.0562471	0.419698	1.82865	-0.0579967	1.08036	0.444128	0.235251	-0.0530925	-1.63702	-0.166876	-1.26097
PPP1R3D	0.255089	-0.266354	-1.03023	0.426133	-0.202055	1.97413	-0.442163	-0.0197906	-2.13926	-0.326063	0.117319	1.63913	-0.678048	1.30799	-1.18615	1.15896	-0.946581	0.518184	-0.133741	-0.0264973
DTX2	-0.109949	-1.27324	-1.16646	0.977363	0.518813	-0.183957	0.824567	-0.777276	-0.136794	1.07033	0.519334	1.08142	0.456052	-0.414769	0.993096	0.158017	-2.53046	1.2914	-1.1762	-0.121273
XPR1	0.21595	-0.641827	-1.44245	0.95699	0.42383	-0.48167	0.580101	0.330866	0.119598	1.44307	1.11451	2.44063	-0.205753	0.095099	-1.22519	-0.927347	-1.53024	-0.214487	-0.66486	-0.386814
FAM114A1	0.617332	-0.844056	-1.81079	0.900269	0.213527	1.14512	0.0939921	0.516609	0.507141	0.0108134	1.04084	1.89721	-0.138301	-0.269984	-0.253306	-1.5319	-1.93429	0.721738	-0.228684	-0.653287
PIH1D1	-1.36697	0.828563	0.271529	-0.35808	0.334934	0.776762	-1.09687	-0.169395	0.714083	0.628364	2.02154	1.21376	-0.107314	-0.150069	0.526021	-0.119727	-2.08954	-0.391043	0.244346	-1.71088
TSPAN17	0.734239	-0.329109	-0.647672	-0.659374	-0.677879	0.837982	-1.4111	0.421049	-0.0569078	2.04561	0.522601	1.76156	0.369079	-1.10319	0.558041	0.555086	-1.87668	0.143083	-1.03205	-0.154366
TMEM259	-1.35944	0.0613178	0.0342082	-1.14131	1.00606	0.939878	-1.55892	0.065308	0.0356546	0.605532	0.114465	2.2173	0.723738	-1.56328	0.889808	0.0584805	-1.48099	0.414294	-0.239862	0.177746
MFSD11	-1.0818	-0.163212	-2.03295	-0.000348838	-0.616291	1.39053	1.30733	0.73911	1.54566	0.114085	0.107932	0.900339	-0.533417	-0.0991938	1.36173	-0.120008	-1.04618	-1.29711	0.403616	-0.879825
JTB	-0.952876	0.225487	-0.814599	-1.0668	-1.3724	1.43249	1.01799	0.266979	0.554492	-0.0465509	0.988373	0.909027	0.222293	-0.52115	1.38759	0.256422	-1.656	1.22326	-0.567001	-1.48702
C14orf119	0.508472	-0.188891	-1.86228	0.27509	-1.32599	1.51954	0.442989	0.499296	0.753813	-0.430114	0.341929	1.83402	0.308495	-0.546505	0.695204	-0.274222	-0.830331	0.65119	-0.309181	-2.06253
SNRPB	-1.17532	-0.658566	-0.269606	0.603606	-1.27598	1.3428	-0.634748	-0.188244	0.733516	-0.00471322	-1.05952	0.615871	0.819279	0.484901	2.32925	0.348359	-1.14959	0.600747	0.172869	-1.63491
EFHD2	-0.473049	-1.36865	-0.196177	-0.00202404	-1.34284	2.62808	0.101346	0.82291	1.01008	0.535668	-0.998277	0.681252	1.34389	-0.556151	-0.237164	-0.404287	-0.996453	-0.269864	0.654472	-0.93277
NOP10	-0.347039	-0.572543	-1.07238	-0.127576	-0.450325	2.79516	-1.25341	0.567698	0.549464	-0.154731	0.604139	0.805787	1.29556	-0.166599	0.574875	-0.386812	-1.0273	0.371455	-0.392046	-1.61337
MEA1	0.187634	-0.500441	-0.838166	0.566527	0.521029	2.39733	-0.0258638	0.888406	0.289029	-0.181266	-1.21722	0.635775	1.26385	-0.0863619	0.477966	-0.698309	-0.863263	-0.328357	-0.101718	-2.38658
AP2S1	-0.814843	-0.550516	-1.45267	0.190531	0.361373	2.37469	-0.278287	0.460749	0.578008	0.0267154	-0.307478	1.09619	1.35343	0.607024	0.810762	-1.52729	-0.619927	-0.815052	-0.0978546	-1.39555
IRF2BP1	-0.214562	0.558586	-1.3731	-1.08832	1.17414	-0.0514857	-0.0475387	1.38753	-0.430077	1.22984	-0.585046	-0.579367	0.630055	0.354983	0.947067	-2.00052	-0.831216	1.38087	0.707591	-1.16943
RPS9	-0.490271	0.0378042	-1.55248	-0.861051	-0.919765	-0.38537	0.0943676	1.57113	0.167738	1.07999	1.17197	-0.129666	0.947231	-0.160668	0.937321	-0.872841	-1.13834	1.35326	0.897268	-1.74763
RPL28	-1.09651	-0.102812	-0.701913	-0.523628	-0.723346	1.35476	1.03406	-0.0533314	0.637554	0.843587	0.53633	-0.804194	0.843538	-0.545105	0.769651	-0.639903	-1.22203	1.55266	0.993573	-2.15295
PMVK	0.958898	0.537909	-0.612156	-0.374282	-0.0222976	0.864798	-0.198529	1.46904	0.632634	1.28701	0.280923	-0.298133	0.592526	-0.0192044	0.188802	-0.547678	-0.425343	-1.31247	0.0812121	-3.08365
FIBP	-0.128749	0.424571	-0.578815	-0.15771	0.146404	1.59111	0.232549	1.2681	0.469927	0.343642	-0.151366	0.659381	0.744179	0.919853	0.553615	-1.11488	-1.54964	-1.51446	0.236295	-2.394
PYGO2	-0.848297	1.01366	0.703902	-0.822449	-0.0780092	1.18768	0.822169	1.15588	-0.455022	-0.0892827	-1.54653	0.851574	1.57641	-0.680708	0.638404	-0.653811	-0.725164	0.400989	-0.265065	-2.18632
AKAP10	-0.0894958	1.18536	-0.354036	-1.70145	-1.05335	1.34985	0.483814	1.57889	-1.6075	0.441709	0.231942	1.25111	0.155774	-0.750397	0.610063	-0.651427	-0.1452	-1.14809	1.0454	-0.83297
BHLHE41	-1.26439	0.191356	0.542837	-1.64837	1.15242	1.81789	-0.0844352	1.08733	0.38788	0.795897	-0.669975	1.4943	-1.00394	-0.620913	-0.625226	-0.0665429	-1.26665	-1.10798	0.28705	0.601483
TNFRSF21	-1.0296	-0.806641	-0.94338	0.126217	0.712127	1.86084	-0.706248	1.56283	0.879126	1.1881	-0.510154	1.57536	-1.16844	-0.718679	-0.362673	-0.855708	-0.241436	-1.16514	0.61985	-0.0163607
ABTB2	-0.378446	-0.484163	-0.45054	-0.961292	-0.32391	0.276245	-0.576297	1.44035	1.15483	1.28357	-0.987434	2.69633	-0.423149	-1.16256	-0.70478	-0.119941	-0.155102	-0.98627	0.0635757	0.798982
MED31	-1.09647	0.821486	0.142332	-0.205101	0.450762	1.90758	0.64098	-1.09712	0.682147	0.892325	-2.51554	0.900563	-0.623782	-0.764318	0.895698	-0.446785	-0.0498002	-0.795272	0.659063	-0.398753
PSD4	-0.820636	0.257344	2.15745	-0.941938	-1.56414	0.928686	-0.405397	-0.0158116	0.770076	1.35632	-1.72943	0.815266	-0.410793	-0.789973	-0.190917	0.290296	0.0577356	-0.940324	1.16424	0.0119467
ZC3H12D	-0.363267	0.934224	1.99364	-0.600693	-0.234248	1.37252	-0.191266	0.275638	-0.168674	0.0980766	-1.26708	1.18926	0.694267	-0.636873	-0.399151	0.115975	0.161051	-1.92402	0.742576	-1.79195
ZNF800	-0.479535	-1.59412	0.829583	-0.468072	-1.33938	1.27389	-1.52469	0.399782	-1.46675	0.558517	-0.424893	0.94981	0.0618438	0.394826	0.212124	-0.0380248	0.907215	0.63529	-0.826206	1.93879
MTMR10	-1.09052	0.467385	0.905693	0.181987	-1.10717	-0.760812	-1.26519	0.387434	-0.213981	0.604048	-0.731656	1.72417	0.321586	1.51313	-1.41453	-0.285202	0.845804	0.399062	-1.61886	1.13762
BCL10	-0.00446372	-1.87345	-0.378013	1.83707	-2.81778	1.12128	-0.013403	0.548999	0.300834	0.587996	1.09628	0.32727	0.117985	-0.0613841	-0.606938	0.0219004	-0.178865	-0.390528	0.395697	-0.0304808
ZMYND8	-0.0580914	-1.85183	-0.0144245	1.10367	-2.17877	0.54985	-1.02453	1.00718	-0.276108	1.22067	-0.162793	1.20741	1.10909	0.582587	-0.214293	-0.0950061	-0.636416	-0.977429	-0.334094	1.04333
SGK3	-1.41555	-1.34761	-0.687504	0.250786	-1.55682	0.383019	0.0714311	-0.198286	-0.582544	0.509252	0.406085	2.19651	0.122351	0.751011	-0.57778	1.88803	0.344111	-0.143107	0.725958	-1.13936
RIOK3	-0.864462	-1.68925	-0.953046	-0.297222	-2.37823	-0.222016	0.518352	0.841608	1.10464	0.68127	0.380594	1.97054	0.0664148	-0.181833	-0.102096	0.377744	0.480576	-0.832559	0.929893	0.169085
FEM1C	-0.837024	-1.86567	-1.20824	0.255617	-2.36172	0.460103	0.188244	0.795817	0.69659	1.36103	0.377212	1.91564	0.442908	-0.0523033	0.186042	-0.310497	0.181135	-0.175782	0.356789	-0.405894
WSB2	-0.673609	-1.98014	-1.31018	0.906575	-1.99202	0.178099	0.225205	0.803129	0.97888	0.716629	-0.0220857	2.11071	0.655516	0.0101699	0.0246885	-0.247653	0.106275	-0.894207	0.401573	0.00243487
CDC42SE2	-0.488499	-1.15434	0.257977	0.444887	-3.17539	-0.0908443	0.043569	1.39766	0.486548	1.10187	-0.577365	1.36791	0.196608	0.0994717	-0.31315	0.144333	0.354248	-0.573214	0.841642	-0.36391
SLC6A8	-0.272747	-0.333895	-0.530263	0.72247	-2.84885	0.693995	-0.316253	0.858253	0.681603	1.58702	-0.462386	1.10524	0.613774	0.227915	-0.935757	0.853919	-0.157934	-1.418	0.17424	-0.242348
STK11IP	-0.1385	1.90229	-0.0882034	-0.276315	-0.951028	-1.4176	-0.416822	1.26385	0.887846	-0.553579	0.0497243	0.625553	0.114407	1.25045	-0.285467	0.272808	-0.316982	-2.485	0.966039	-0.403475
HAUS8	-0.479857	0.424241	-0.798407	-0.918375	-1.90226	-1.25011	0.151025	-0.427308	0.362315	0.549706	0.427402	0.248079	1.84775	1.35249	0.257565	-0.344452	1.38777	-1.22871	1.20067	-0.859533
GFOD1	-0.0502282	0.923816	-0.0461922	-1.78642	0.109565	-1.70721	-1.17924	0.250388	0.648542	-0.236981	0.571681	2.49722	-0.623556	0.580084	-0.673791	-0.280364	0.910792	0.106422	0.838953	-0.853468
PDLIM2	-0.864491	-0.321581	0.0146178	-2.14635	-0.224072	0.197418	0.730759	0.844249	1.42945	0.400353	-1.31101	1.94359	0.344367	-0.216498	-0.790962	0.34656	0.274963	-1.47297	1.12227	-0.300676
POR	-0.924358	-0.639599	-1.96497	-1.15697	0.179206	0.344348	-0.175792	1.53315	0.490108	0.402013	-0.952628	2.33572	0.664916	-0.295422	0.0908085	0.977217	-0.0466089	-0.745595	0.711107	-0.826662
CYP2S1	-0.751995	-0.215344	-1.77047	-2.07139	-0.60627	-0.773006	-0.150502	1.77469	0.507685	1.82873	-0.853448	1.23282	0.519086	0.154509	-0.0545522	0.544992	0.150301	-0.236237	0.444252	0.326147
SLC50A1	0.637311	-0.640065	-0.737705	1.98524	-0.16441	-0.405958	-0.900868	0.0740541	-0.0934978	-0.504899	0.311417	2.64724	0.577589	0.630088	0.313565	-1.10796	-1.26499	-0.653447	0.352485	-1.05519
CYP51A1	0.809585	-0.550994	-0.620662	0.974219	-0.0943695	-1.64913	-1.29233	1.35257	0.0576677	-0.01317	0.200331	2.92848	-0.440282	0.365397	-0.935075	-0.442492	-0.10674	-0.322187	0.290717	-0.511541
MSMO1	0.660973	0.00906549	-0.206434	0.860812	-0.60308	-0.751657	-0.941118	-0.117703	-0.649328	-0.837903	0.584433	3.51553	0.0425584	0.646527	-0.231295	-0.584432	-0.216104	-0.956375	0.2912	-0.515673
IDI1	-0.0479912	-0.329394	-0.228034	0.701555	-0.883873	-0.126747	-1.13866	0.293772	-0.213782	-0.0918345	0.430806	3.53711	-0.139786	0.448412	-0.343154	-0.26782	-0.0287889	-1.08651	0.680624	-1.16591
SC5D	0.223756	-0.0458091	-0.583237	0.63277	-1.32828	-0.699163	-0.744388	0.720891	-0.130071	0.202699	0.615113	3.42611	-0.947573	0.690993	-0.176899	-0.340645	-0.119616	-0.687102	0.11684	-0.826398
PCYT2	0.314343	-0.647226	-2.04277	0.0449125	-1.11953	-1.28032	-0.86229	0.963561	-0.537731	0.159176	0.253943	2.33552	1.46716	0.829467	0.244392	0.506508	0.223577	-0.318806	0.211687	-0.745579
DHCR24	0.533005	-0.431625	-0.336412	0.852411	-1.74789	-1.42954	-0.329847	0.982998	0.763532	0.047293	-0.0165001	2.41857	0.371808	0.394534	-0.374576	0.0331921	0.0407539	-2.02361	0.634561	-0.382667
HMGCR	0.0567777	-0.491139	-0.66382	0.62522	-2.18937	-1.76046	-0.156946	0.551313	0.124131	-0.310651	0.548011	2.723	0.415706	0.889963	0.0819639	-0.397907	0.309075	-0.641239	0.458072	-0.171701
ACAT2	-0.168406	-0.299188	-0.22235	0.801986	-1.73181	-1.52337	-0.0222986	-0.045736	0.476823	-0.518104	0.178987	2.85845	0.289415	0.127844	0.680238	0.0357939	0.602315	-1.24699	0.77127	-1.04487
SFN	-1.10904	-1.68033	-1.52074	0.492935	-1.27019	0.609942	-0.189718	1.13956	0.720514	0.0113325	1.1433	2.03098	1.09293	0.0190021	0.800517	-0.470734	-0.17801	-0.282163	-0.794277	-0.565816
DDA1	-0.664293	-1.47765	-0.816389	-0.809533	-0.933366	0.156005	-0.410785	1.052	0.524401	0.784057	1.70105	2.12506	1.2709	0.23525	0.562109	-0.964051	-0.748336	-0.916548	-0.481404	-0.188483
TRIP10	-1.2299	-0.809418	-1.50901	-0.282163	0.632096	0.957305	-0.462081	0.307758	0.904914	-0.739808	0.264902	2.12963	1.6154	-0.131863	1.06229	-1.44372	-0.796539	-0.520374	-0.232895	0.283471
ATP6V0B	-0.732108	-0.782307	-1.23914	0.134998	-0.501414	1.99193	-0.158484	0.321421	0.262768	0.28308	0.536504	2.84248	0.679409	-0.33505	0.216427	-0.879592	-1.00621	-0.796294	-0.275049	-0.563373
ABHD5	-0.861138	-1.36369	-1.2678	-0.435701	-0.872252	1.36013	0.804636	0.489892	0.0129876	-0.583712	0.221952	2.51344	1.08749	0.219679	0.715119	-0.604745	0.432508	-1.07264	0.164675	-0.960831
PCYT1A	0.318314	-1.27946	-1.60068	0.421494	-0.415518	-0.0860081	0.160876	0.193626	0.958801	0.454225	-0.620836	2.50494	0.475598	0.982254	-0.274289	-0.362564	0.587473	-1.55562	0.558065	-1.4207
GPAA1	-0.380309	-0.66017	-2.58547	-0.206062	-1.12638	-0.0672253	0.416902	1.51165	0.600185	-0.145843	-0.557481	1.81976	0.735132	0.917872	0.537501	0.0843195	-0.800252	-0.0753806	0.893762	-0.912509
SNX12	-0.183409	-0.342312	-1.85144	-0.336122	-0.98138	-0.846207	0.59701	2.01301	1.27939	0.50424	-1.13514	1.33431	1.27378	0.224728	0.294767	-0.428993	0.0367781	-1.35421	0.438703	-0.5375
JPT1	0.389272	-0.582803	-0.881124	0.475443	-2.06113	1.24352	0.128162	1.05442	0.653486	-0.149514	-0.3504	1.18959	1.10319	0.0538278	1.23999	-0.598423	-0.105699	-1.92692	0.391329	-1.26621
TWF1	0.844331	-1.33659	-1.03826	0.861351	-1.8147	-0.536176	0.00157761	1.93549	0.733769	0.490621	-0.93423	1.90576	-0.20911	0.292293	0.154843	-0.593886	-0.0103503	-0.578366	0.695402	-0.863779
HDAC1	-0.27962	-1.31029	-0.58415	1.00363	-2.52476	-1.25909	-0.142827	0.941603	1.31354	0.411692	0.117962	1.68776	0.854789	0.26758	0.499714	-0.656195	0.396208	-0.747403	0.135647	-0.125799
CYFIP1	-0.0346145	-1.25882	-1.48776	0.494894	-1.62855	-0.667321	0.0952738	1.45911	1.06895	0.321017	-0.238621	1.97966	0.504852	-0.00848322	0.508968	-0.88957	0.630989	-1.55314	0.611964	0.0912031
GALE	-0.207302	-1.8949	-1.14287	1.7042	-1.27677	0.539133	-0.60218	0.295026	0.540504	0.482174	-0.284104	2.34261	0.765802	0.177078	0.725005	-0.783111	-0.765319	-0.590744	0.00483565	-0.0290537
PPARD	-1.16336	-1.19985	-0.822976	0.45029	-1.34184	0.852673	-0.231132	0.932519	1.3172	0.760064	-1.30936	2.45937	0.71874	-0.0826597	0.277372	-0.125306	0.195178	-0.858476	-0.232079	-0.596358
TBC1D2	-0.50583	-2.01438	-1.15273	1.184	-1.84071	0.810682	0.059141	1.01473	0.981261	0.282407	-0.351674	1.952	0.889761	-0.141979	0.417529	-0.258071	0.0933373	-0.383434	-0.239294	-0.796748
NHP2	-0.30369	-1.10247	-1.57965	0.867863	-0.066533	-1.33887	-0.43721	0.992708	0.0610178	0.592459	-1.05738	-0.169464	0.852216	0.71668	1.4868	0.0901766	-0.694679	1.71835	0.885295	-1.51363
PTGES3	0.240228	-1.29743	-1.19206	-0.0316757	-1.61788	-0.729643	0.987347	1.21576	0.120408	-0.00957072	-0.198461	-0.0512872	0.80611	1.08477	1.79108	-0.437383	0.282787	0.363284	0.726076	-2.05245
JPT2	1.14626	-1.44563	-0.895715	0.233583	-1.75905	-1.88058	0.147802	0.9865	0.529948	0.165896	0.100735	0.434115	0.775822	1.31686	1.18511	-0.14672	0.102392	0.342319	0.283983	-1.62363
STARD7	-0.79786	-0.814349	-1.0086	-0.743912	-1.52933	-1.06191	0.203037	2.35873	0.696196	1.35969	-0.108389	0.014261	0.297164	0.946796	0.794065	0.237672	0.0247911	-0.00707927	0.724899	-1.58586
AHSA1	0.362805	-1.4476	-1.4586	0.0945675	-1.23256	-0.257605	0.370498	2.08871	0.0166384	0.43666	-1.21012	0.625754	0.367105	0.332745	1.42483	0.667792	-0.0965539	0.546015	0.219996	-1.85108
FMN1	0.55066	-1.51855	-0.673585	0.666047	-1.77539	-2.22152	0.132627	1.29932	0.71382	1.12762	0.541339	0.0729108	-0.168869	0.953097	0.143335	-0.79864	0.276803	-0.521348	-0.0915619	1.29188
GSPT1	-0.343349	-1.5942	0.00166357	1.90045	-1.96079	-1.34008	-0.114791	1.17223	0.900271	0.838441	0.657834	0.507592	-0.876396	0.0346877	0.85665	-1.12564	0.0993198	-0.526703	0.564061	0.348745
C1orf21	-0.432117	-1.5229	-1.10375	-0.549945	-1.99226	-1.90574	0.842251	0.865172	0.887156	1.13058	0.928657	0.720892	-0.189082	-0.275924	-0.0379239	0.0894464	0.465409	1.19227	0.839902	0.0479136
KIAA1522	-0.537819	-1.62819	-1.33295	-0.13096	-2.22507	-1.87684	0.528681	0.976109	0.929481	0.681712	0.434525	1.3713	0.699042	0.376637	0.28137	0.3296	0.158888	0.292276	0.396167	0.276038
CAPN5	-0.527799	-1.67751	-1.23328	-0.0667856	-2.49519	-1.5624	0.377146	1.03739	0.814601	0.858643	0.58904	1.25155	0.411336	0.243436	0.318412	0.0224278	0.135565	0.271851	0.590683	0.640881
SH3BGRL2	-0.614692	-1.37758	-0.886231	-0.38072	-2.30735	-2.23317	0.405084	0.819142	0.580436	0.889669	0.331466	1.1682	0.337221	0.752533	0.743398	0.0497232	0.378612	0.438438	0.632017	0.273804
ATP8B1	-0.208461	-1.73201	-0.804145	0.046678	-2.46598	-2.1669	0.599717	0.964356	0.512656	0.862094	0.42669	0.792014	0.33666	0.57349	0.246745	0.160842	0.462478	0.514201	0.567521	0.31136
KLC4	-0.0609586	-1.17643	-0.975112	-0.823454	-2.56398	-1.9809	0.611231	1.26662	0.868939	0.598316	0.312991	0.799032	0.275697	0.705927	-0.0945841	0.356405	0.444047	0.276523	0.608562	0.55112
ACVR1B	-0.563716	-1.91967	-1.18175	-0.740669	-2.01131	-1.49498	0.695803	1.3298	0.748587	1.17774	0.257019	1.21925	0.349174	0.470202	0.0570384	0.447856	0.282366	0.132935	0.151014	0.593308
KLF3	-0.633099	-1.35759	-1.29012	-0.0592392	-2.11761	-1.15522	-0.0106421	0.894306	0.499869	0.752015	2.34371	1.11851	-0.292928	0.298402	-0.322225	-0.169677	0.222567	0.461671	0.463061	0.354258
GSR	-0.260066	-1.15092	-1.03382	0.648347	-2.49864	-1.5237	0.201275	1.00193	0.204672	0.833463	0.889649	1.66891	0.254756	-0.895998	0.640898	-0.409214	-0.00217139	0.68843	0.39102	0.351167
DOCK5	-0.426507	-2.00946	-1.27568	0.104834	-2.6526	-0.58777	0.421144	0.71815	0.459502	0.135007	-0.0408192	0.838361	-0.00883427	0.138553	0.545042	0.746591	1.06794	0.2008	0.19765	1.42809
FAM120A	0.133462	-1.46094	-0.736269	0.642501	-2.89786	-1.66614	0.407784	1.13401	0.579796	0.552216	0.630594	0.922764	0.0911911	0.975549	0.456266	-0.0394934	-0.195785	0.195969	0.352474	-0.0780942
NET1	-0.514038	-1.56303	-0.482158	0.513776	-2.63885	-2.05829	0.541171	1.2285	0.549736	0.907319	0.428337	0.00233003	0.198067	0.411027	0.0397552	0.439213	0.636309	0.621694	0.464292	0.274841
KIF13B	-0.459862	-1.7301	-0.574264	0.777074	-2.31304	-1.18256	0.20886	1.51973	1.1524	1.06151	-0.110109	1.39144	0.327504	0.208637	-0.853602	-0.0415731	0.057035	-0.281658	0.283257	0.559319
COG3	-0.292207	-1.76334	-1.23337	0.506987	-1.94145	-1.6062	0.490953	1.0561	0.534905	0.701033	0.332876	2.04922	-0.692485	0.393188	-0.00782851	0.507515	0.501019	0.192497	0.228621	0.0419634
TLK1	-1.51739	-0.946242	0.36802	-0.688259	-1.86445	-1.20514	1.30887	1.14041	0.448226	1.16803	-0.534966	1.53221	-0.524546	0.681457	-0.33273	-0.714551	0.836484	0.663243	0.607804	-0.426479
ZDHHC23	-0.797447	-1.19669	-0.801306	-0.808741	-2.00389	-2.54237	0.632919	0.690569	0.603504	0.586223	0.750643	0.798173	0.191265	0.681738	0.561536	0.50245	0.752553	0.239963	0.524135	0.634783
ACSF2	-1.16492	-0.958938	-0.740282	-1.64602	-1.94954	-1.97673	0.76654	0.60725	0.64576	0.427392	0.665277	1.07745	0.836395	0.358073	0.610058	0.399474	0.730029	0.160433	0.666244	0.486058
HMGCL	-0.977426	-0.959335	-1.46292	-0.973886	-1.6292	-1.97282	0.709044	0.770085	0.647288	0.670863	1.16592	1.26293	0.790871	0.993824	0.541676	-0.466499	0.122963	0.212386	0.617894	-0.0636519
AUH	-1.54688	-0.878132	-1.36829	-1.36076	-1.83707	-1.48205	1.01956	0.569084	0.552845	1.01365	0.753948	0.878528	0.390643	1.11141	0.27754	-0.00672787	0.310979	0.426637	0.774712	0.400363
GCNT2	-1.61514	-1.47109	-0.266648	-0.215034	-1.89611	-1.83057	1.1603	0.843038	0.127997	0.0164158	0.0743232	1.29097	1.09172	0.826557	0.819032	0.0323313	0.14319	0.763794	0.414085	-0.309166
PWWP2B	-0.960313	-1.63944	-1.05522	-0.984931	-1.7347	-1.59492	0.765284	0.788041	0.848543	0.532721	0.998745	1.60241	0.797665	0.317946	0.858964	-0.101933	-0.0144011	0.687873	-0.135362	0.0230366
CPT1A	-1.2678	-1.5943	-0.968708	-0.806443	-1.56293	-1.90305	0.283532	0.45384	0.770691	0.607268	-0.279708	1.2175	0.862543	0.850201	1.4348	0.101645	0.510549	0.381798	0.583033	0.325537
CYP4F2	-0.117084	-0.996163	-1.20006	-1.11685	-1.6084	-1.52372	0.263493	0.926595	1.10738	-0.519963	-0.450997	2.01555	-0.14848	1.38981	0.54796	0.210554	0.381459	0.151873	1.05222	-0.365175
ABCB1	-1.71294	-0.911461	-0.904009	-1.65813	-1.32646	-1.35832	0.747923	1.26552	1.16087	0.72831	-0.57691	1.10192	0.650358	0.371113	0.262756	0.572196	0.672469	-0.367793	0.876629	0.405958
MIER3	-1.3239	-1.43892	-0.851483	-0.92442	-2.14174	-1.37176	0.745998	0.810881	0.968029	0.266077	-0.110305	1.20822	0.451021	0.308229	0.648092	0.418358	1.26211	-0.181429	0.87875	0.378194
APPL2	-0.772184	-1.4332	-1.05731	-1.09784	-2.34397	-1.16457	0.646016	0.999101	0.773684	0.851276	-0.417115	1.42403	0.675438	0.478819	0.51758	0.262468	0.689145	-0.158461	0.761039	0.366051
CIPC	-1.07224	-1.46623	-1.03653	-1.57589	-1.80588	-1.38158	0.86103	0.961349	0.72346	0.584099	-0.0830592	1.48293	0.383143	0.699895	0.46216	0.401333	0.734657	0.0924774	0.783423	0.251447
TMEM82	-0.97961	-0.602829	-0.700273	-1.37197	-1.9617	-1.44822	1.04607	0.671723	0.897217	-0.138464	0.106009	1.60631	1.73358	0.717748	0.635333	-0.252407	0.0511215	0.064664	0.410172	-0.484477
TMEM37	-0.915397	-0.592153	-0.216427	-1.04048	-2.48094	-1.4374	0.453797	1.23217	0.737751	0.203966	-0.780938	1.74831	0.958676	0.100646	0.930809	0.212494	0.641584	-0.0838804	0.456363	-0.128955
FLVCR1	-0.666292	-1.88598	-0.03631	-0.793597	-0.86369	-1.31568	0.575263	0.456862	-0.203184	-0.478978	-1.03225	2.22026	0.49144	0.453019	1.07983	0.424632	1.35481	-0.623269	1.01867	-0.175562
MARK2	-0.501123	-1.93113	-0.909773	0.0175783	-2.44874	-0.736243	0.0129975	1.36263	0.907708	0.633422	-0.602477	1.68175	0.679705	0.265892	0.404397	0.0546929	0.035227	0.0885755	0.797871	0.187047
UGP2	-0.667327	-1.81371	-0.709837	-0.781759	-2.25907	-1.17407	0.529001	1.05835	1.05183	0.716414	-0.0118818	1.57179	0.429663	0.751505	0.802804	0.183181	0.386161	-0.405485	0.606205	-0.263766
CMAS	-0.965255	-1.42622	-0.932021	0.0121688	-2.62411	-1.08566	0.67795	1.08197	0.64467	0.387295	0.0949814	1.6457	0.564575	0.865859	0.430005	-0.257156	0.335802	-0.0162389	0.828268	-0.262588
ABRACL	-0.981453	-1.08748	-0.603623	-0.679823	-1.99549	-0.259635	0.821684	1.28718	0.72293	0.255616	-0.749274	1.7702	0.511675	1.03012	0.725138	0.28801	0.176685	-0.988044	0.971922	-1.21633
RALY	-0.554453	-0.979976	-0.725702	-0.285543	-2.52865	-1.21689	0.649852	1.25018	1.02402	0.722814	-0.314453	0.895757	1.06248	0.159695	1.11538	0.701484	0.191119	-0.354202	0.432796	-1.24569
SIAH2	-0.991238	-0.90442	-1.1548	-1.18552	-0.416594	1.43639	0.69948	1.03886	0.416234	0.804601	0.881563	1.69081	-0.374138	0.77223	-0.478061	-0.95413	-1.03519	1.32445	-0.421739	-1.14878
ZNRF1	-1.02327	-1.34864	-0.605566	-1.58815	-0.313182	0.400857	0.337968	0.509855	0.631951	-0.411011	1.21083	2.86818	-0.0248388	1.18612	-0.59132	-0.263702	-0.387666	0.0865537	-0.6012	-0.0737751
LAMTOR2	-0.920444	-1.35099	-2.09904	-1.32177	-0.369498	0.972104	0.257544	1.269	0.86188	0.260597	0.0201926	1.43592	0.570762	0.806554	1.03319	-0.324365	-0.165622	0.252653	0.299134	-1.48781
ROMO1	-0.919902	-1.61139	-1.69898	-1.09699	-0.600558	0.00762206	0.460662	0.83495	0.0832305	-0.0346713	0.34627	1.78688	0.908174	0.600763	1.83673	0.363029	-0.551284	0.348802	0.241068	-1.3044
SSNA1	-0.830444	-0.43153	-1.19358	-0.959821	-1.56552	0.385027	0.956839	1.07622	1.21863	-0.331989	0.384268	1.22774	0.515072	0.923962	1.21592	0.468716	-1.01611	-0.124247	0.0768721	-1.99602
PYCARD	-1.16967	-0.550296	-0.707115	-1.40198	-2.19585	-0.6882	0.631017	0.828616	1.10602	0.0192771	0.808515	0.851979	0.795507	1.21058	0.84866	0.353661	0.237969	0.370584	0.282502	-1.63178
SMPD2	-0.739893	-0.200617	-0.538221	-1.81708	-0.778069	-0.244503	-0.931999	0.78842	0.181851	-1.04241	1.38125	1.14741	1.39397	0.26312	1.92491	-0.306633	-1.2088	0.232741	0.907599	-0.413039
TMEM256	-0.228997	0.068577	-0.97723	-1.14365	-1.76777	-0.0585645	-0.491255	0.423978	-1.32785	-0.636034	1.01657	1.43235	-0.0402631	1.85525	1.82204	0.082185	-0.23427	0.851529	-0.0799633	-0.566651
SLC20A1	-1.82271	-1.14431	-1.0186	-1.0424	-1.1383	0.111715	0.626481	0.29633	-0.189302	-0.927733	2.14965	0.833706	0.989723	-0.356005	0.677318	-0.568222	1.15325	0.369506	0.94079	0.0591083
STK11	-1.15962	-1.36447	-0.537052	-1.49396	-2.23584	-0.259695	0.423739	0.442461	0.192804	-0.141726	0.492593	0.884034	1.40959	0.730276	1.7178	0.258163	0.0263245	0.92258	-0.549578	0.241571
FSIP1	-1.00217	-1.00465	-0.975405	-2.54896	-1.65977	-0.86549	0.498568	1.2852	0.473318	0.245272	1.24056	0.833407	0.579233	0.475275	0.458727	0.322199	0.527616	0.505433	0.207707	0.403927
DUSP23	-1.12424	-1.06337	-1.7964	-1.34588	-1.55056	-0.943679	1.2781	1.04135	0.346093	0.472286	0.558003	0.655944	0.470688	1.39999	0.883327	0.787797	0.102416	-0.104816	0.623568	-0.690618
GDPD2	-1.09399	-0.67883	-2.15168	-1.75325	-1.07216	-0.867965	1.06027	0.824283	0.505297	-0.0688135	0.388664	1.41803	1.38565	0.513502	0.262961	1.10775	0.128226	-0.0536423	0.0581994	0.0874791
NAXE	-1.44214	-0.445333	-1.22736	-0.976085	0.115409	-1.13166	0.137993	2.02195	0.392906	0.231275	0.581993	1.99705	0.408117	-0.610248	0.696331	0.72832	-0.578699	0.73637	-0.290512	-1.34567
SNX33	-0.568715	-0.576003	-2.37856	-0.069606	0.543282	-0.290073	-0.561971	1.67067	1.1226	1.10377	0.57158	1.66781	0.759086	-1.50543	0.226654	-0.125507	-0.336063	-0.264371	-0.377002	-0.612156
C8orf33	-0.932819	-0.965229	-0.780162	-0.785417	-0.541897	-0.835762	-0.962086	1.17878	0.271198	2.14733	0.795728	1.11115	-0.391819	-0.22041	-0.361414	1.47617	-1.28877	-0.462106	0.259345	1.28818
SLC1A5	-0.276474	-2.39082	-2.58741	0.594949	-0.0273979	0.495132	-0.273896	0.924194	0.785087	1.37234	0.531652	0.90206	-0.0249776	-0.172844	0.0583924	-0.117569	-0.826781	0.643354	-0.0927148	0.483726
XPNPEP1	-0.104662	-1.77319	-1.85732	0.0883259	0.526356	-1.10051	-1.53674	0.45889	1.08907	0.8863	1.01733	1.75047	-0.294421	0.536745	0.275093	-0.343399	-0.850105	0.0248695	0.259655	0.94723
ARFIP2	-1.34656	-1.24948	-1.63866	-0.440078	-0.727273	-1.37138	-0.608097	-0.314868	0.829797	0.501476	2.15208	1.42205	0.324668	0.123851	0.436828	-0.0506518	-0.269873	0.787759	0.37832	1.0601
TCP11L1	-0.912882	-2.34576	-0.606109	-1.2303	-0.246562	-0.908125	0.986449	1.50969	0.906828	0.626247	-0.292047	1.51654	-0.775239	0.802954	-0.0981171	-0.354403	0.54209	-0.361034	0.134147	1.10563
STK38L	-0.163599	-2.13387	-1.70277	-1.97175	0.0809529	-0.21129	0.513823	1.59462	0.174665	0.635078	-0.0512317	0.458264	-0.619581	0.703186	0.476021	-0.524472	0.265602	1.04149	0.186662	1.24821
SLC39A14	-1.03321	-1.90575	-2.01582	-1.14002	-0.746651	-0.140189	0.669994	1.3963	0.563507	0.939624	0.284195	1.923	0.117086	0.0920112	-0.0518832	-0.121987	0.687878	-0.253071	0.627848	0.107136
FBLIM1	-0.601031	-1.69111	-1.51776	-0.861029	-1.03127	-0.855598	0.481263	0.562528	1.23084	-0.125465	-0.0386243	2.40851	1.37796	-0.346968	0.464693	0.0618676	0.359247	-0.477972	0.674661	-0.0747396
PNKD	-1.06138	-1.56466	-1.3851	-1.42045	-0.611676	-0.881401	0.35722	0.953905	0.879306	1.10483	0.154195	1.81153	1.5322	0.605367	0.337393	-0.18384	-0.747163	-0.407713	0.635195	-0.107765
VPS28	-1.1123	-0.925241	-1.55321	-0.801259	-1.70696	-0.874033	0.761286	1.46482	1.10157	0.824484	0.335684	1.68876	1.11571	0.430709	0.573176	-0.314725	-0.128448	-0.50455	0.255008	-0.630475
CRAT	-1.32878	-1.71377	-1.82607	-0.153835	-1.11931	-1.48667	1.11837	0.48292	0.442348	0.949408	0.109606	1.76477	0.865156	0.46345	0.254623	-0.0482612	0.580125	-0.107753	0.146586	0.607098
SNX13	-1.26289	-1.50181	-1.52261	-0.757312	-1.14805	-1.26553	0.725511	0.797276	-0.350686	0.7309	-0.11065	1.73914	0.175531	0.54428	0.441998	1.12912	1.3983	-0.608827	0.403519	0.442794
TMEM65	-1.70717	-1.91753	-1.17851	-1.47824	-1.21142	-0.514915	0.9768	0.286971	0.356498	0.395029	0.545729	1.39289	0.514966	0.9083	0.138301	0.324859	1.41456	-0.0438186	0.330736	0.465969
SYT7	-1.13068	-2.33986	-1.26613	-0.634016	-1.18337	-0.838085	0.153313	0.350533	1.08634	1.15593	1.06796	1.26195	0.21155	-0.213989	-0.514376	0.123407	0.655322	0.275446	0.511599	1.26715
OTUD7B	-0.572117	-1.36377	-1.58506	-0.866422	-1.36158	-1.78598	-0.211061	1.547	1.24598	0.868964	0.26719	1.56146	0.155776	0.125672	0.11405	0.398631	0.0178699	0.132492	0.370733	0.940177
PLXNA2	-0.270643	-1.60105	-1.30456	-0.622891	-1.89938	-1.81998	0.276843	1.03289	1.00001	0.277167	0.910684	1.65299	0.332222	0.307587	-0.200227	0.599146	0.813073	-0.189772	0.45596	0.249927
TSEN34	-1.18105	-0.861794	-2.08701	-0.842887	-1.4808	0.279324	0.976446	1.43869	0.54605	0.922955	0.888345	0.928485	-1.00268	1.26142	0.559329	-0.0183649	-0.159823	-0.265599	0.636984	-0.53801
RNF128	-0.948496	-1.13761	-2.41796	-1.09942	-0.889926	-0.877557	0.982921	1.39255	0.100624	0.680542	0.398469	1.40373	-0.207683	1.42933	0.105565	-0.16314	0.182777	0.618507	0.36723	0.0795425
ADI1	-0.0480029	-0.786807	-1.74406	-0.365428	-0.714917	-0.755348	-0.0507815	1.74625	1.18497	1.15854	1.6953	0.819916	-0.884251	0.676161	-0.936338	-0.810342	-0.652785	0.136407	1.03319	-0.701668
FBXO32	-1.56749	-0.255891	-1.36001	-0.989036	-0.973444	-0.376086	0.127763	1.42845	1.485	1.07253	1.50798	1.33872	-0.269763	-0.0357344	-0.953371	0.00302892	0.42623	-1.14321	0.750799	-0.216474
TMEM144	-0.145292	-1.51639	-1.80748	-0.654693	-1.43854	-1.31705	0.0444908	1.77529	0.278836	1.33597	-0.515623	1.43179	-0.0238676	0.315375	-0.333041	0.811317	0.38607	0.474685	0.76597	0.132184
VAPB	0.169229	-1.56327	-2.23604	0.358441	-0.994314	-1.60681	-0.261748	0.981309	0.17173	1.20602	-0.161219	1.66984	0.307182	1.11969	0.151873	0.407642	0.159683	-0.0776857	0.773906	-0.575441
FBXL17	-1.12149	-1.33462	-0.996712	-0.218311	-0.793362	-2.21336	0.44226	1.02307	0.648539	1.35035	-1.12222	0.899972	-0.34091	1.32129	0.433371	0.0553882	0.578728	0.629196	0.997604	-0.238777
TEX2	0.294905	-1.4003	-1.63068	-0.222542	-0.404864	-2.69096	-0.0703878	1.23469	1.0154	1.64611	0.00635379	0.684626	-0.201965	0.824629	0.126406	-0.155997	0.0777567	0.391107	0.419736	0.0559753
AACS	0.245838	-0.858322	-1.08657	0.294725	-1.44733	-1.66437	-0.537386	0.737471	0.459603	0.491247	0.82862	3.03274	-0.167848	0.473541	-0.574482	-0.0132182	-0.381324	-0.0202689	-0.184864	0.372191
TTC39A	-0.128053	-1.93521	-1.21261	0.918602	-1.51088	-1.02888	-0.230271	1.25599	0.679001	1.09419	1.40868	1.6677	-0.164607	0.15285	0.0794598	-0.524127	-0.944272	0.201076	-0.236066	0.457429
GALNT7	1.10392	-1.86443	-1.15634	0.62285	-1.66868	-1.43191	-0.0258436	0.576622	0.940443	1.30241	0.548727	1.84947	-0.644084	0.507096	-0.103657	-0.374232	-0.414076	-0.15111	0.0927411	0.29008
FAM83F	0.39579	-2.22479	-1.2855	-0.533691	-1.7406	-1.66005	0.36312	0.461659	0.782676	0.539867	1.12741	1.19728	0.541481	1.02406	0.0590446	0.723334	-0.321097	-0.123108	0.380922	0.292193
PDP2	0.171154	-1.13851	-1.20686	-0.83826	-1.66034	-1.84613	0.52507	0.392246	0.357439	0.965434	0.134727	2.36129	0.536979	0.612058	0.557813	-0.0395931	0.0999479	-0.823012	0.77463	0.0639255
SREBF2	-0.581751	-1.08397	-0.697407	-0.118423	-1.79199	-2.19878	0.25228	1.31104	0.817701	0.574047	0.93263	1.93802	0.396237	0.684603	-0.290291	-0.457081	-0.0690275	-0.434202	0.618566	0.197796
FBXO8	0.0884446	-0.463298	-1.52718	-0.657435	-1.84611	-1.44498	0.528553	1.58912	0.695177	1.05856	0.634364	0.958172	0.457076	1.10969	-0.496776	-0.432232	-0.818532	1.01764	0.518865	-0.969128
LAD1	-0.230409	-1.15278	-1.49362	0.0276325	-1.25831	-2.41629	0.401026	1.52395	0.842392	0.323643	0.130309	1.39773	0.728635	1.01212	0.434184	0.267457	-0.169271	0.479608	-0.061591	-0.786412
SNX7	-0.499672	-1.02884	-1.1016	-0.486768	-2.41261	-2.13568	0.581498	0.975122	0.571403	0.555253	0.660823	0.932139	0.362107	0.577911	0.870984	0.137801	0.0235527	0.652168	0.960734	-0.196324
GALM	-0.373937	-1.0462	-1.37711	-0.389652	-2.519	-1.63545	0.214108	0.86651	0.631708	0.428044	0.387923	1.25782	1.35892	0.891918	0.593556	-0.369818	0.28991	0.312812	0.520404	-0.0424684
CENPO	0.373147	0.53913	-0.213635	1.54254	-2.34368	-0.644881	0.17872	0.113702	0.303199	-0.863282	-0.474946	0.60027	-0.276181	1.63947	1.06828	-1.57611	0.475762	-0.211382	0.905064	-1.1352
DEK	1.34705	0.322005	0.340128	1.82128	-1.95681	0.749545	-0.205476	-0.132688	-0.576655	-0.968682	-0.921382	-0.381355	-0.23981	1.23634	0.905415	-0.54305	-0.0805582	0.791361	0.356756	-1.86341
GCLM	-0.163813	0.0883733	-1.03757	1.71927	-1.18494	1.11363	0.60891	-0.930931	-0.876402	-0.715954	-1.06867	0.0354866	0.480448	0.672427	1.10916	-0.165058	1.84571	0.0487932	0.218369	-1.79724
RFC2	-0.0770728	0.322913	-0.191589	1.03529	-0.589421	0.258456	-0.100924	-0.0286968	0.0466604	-1.4404	-1.96232	-0.473603	0.890932	1.41696	1.86086	-0.0152821	0.270295	0.280846	0.60023	-2.10412
CXCL14	0.618794	1.91134	1.14006	0.166121	-1.66279	-0.0873493	-0.0223422	-0.472203	-0.829188	-1.01989	-1.39499	-1.62658	0.761988	0.707166	0.568412	1.06174	0.40972	0.111795	0.709775	-1.05157
CCL8	0.00506303	-0.609446	-0.282253	0.496152	-1.0902	0.558671	1.11219	0.495192	0.0538331	-2.5877	-0.879258	-0.803833	1.56894	0.772353	-0.813919	0.671369	0.777457	1.04771	0.530664	-1.02299
TAF15	0.76596	-0.126482	0.551034	1.48569	0.361678	-1.51586	-0.332753	1.18899	0.808937	-0.037867	-1.00713	-1.84747	1.0048	0.131351	0.767234	-1.80337	-0.779362	0.628486	0.567359	-0.811234
CDT1	0.042136	-0.180402	0.465203	1.07502	-1.82764	-1.76375	0.0726147	-0.381512	1.10898	-1.44348	-0.251312	-0.0536546	1.14264	1.22185	1.2319	-0.913925	0.451991	0.684899	0.541029	-1.22258
TPX2	1.20928	0.405368	0.59298	1.82651	-1.30675	-1.42113	-0.0907271	-0.696186	0.406221	-2.00032	-0.625774	-0.392233	0.924939	1.3809	1.0062	-0.852778	-0.197714	-0.0463602	0.257307	-0.37973
ZCRB1	0.7251	-0.578944	0.763892	-0.481571	1.6536	0.32654	0.359419	-0.434327	-0.107983	-1.32744	-1.52203	1.12596	0.52687	0.80271	-0.562089	-1.45617	0.147123	0.0519584	1.6405	-1.6531
ACOT7	-0.0435517	-0.0212713	-0.806876	0.380366	-0.877414	-1.09299	0.21735	0.412028	1.04072	-1.53647	-1.07212	1.48233	1.15295	1.36366	1.13532	-0.936586	-0.291774	0.00316424	1.09841	-1.60724
ADK	0.0121878	0.41715	-0.0723923	0.140678	0.059146	-1.72383	2.19748	0.535494	0.310817	-0.61546	-1.6533	1.15069	-0.0574705	1.54816	0.977549	-1.1728	-0.192096	-0.38711	-0.444564	-1.03033
INPP1	1.06585	-0.0693939	-1.36316	1.5471	0.881947	1.21263	-0.471474	-1.6712	0.0375708	-0.30393	1.72541	0.772136	0.181316	-0.200198	-0.30889	0.63762	-0.828194	-0.560534	-0.646217	-1.63838
ZDHHC16	1.84168	-0.248169	-0.145042	0.850311	0.976306	0.380445	-0.725525	-0.681719	-1.57562	-1.53135	1.88009	0.828897	-0.0963604	-0.737517	-0.675354	0.593927	-0.558065	0.972898	-0.417011	-0.93282
PKD1L3	1.73054	0.454792	1.01979	1.75557	-0.187203	-0.677712	0.172763	-1.40344	-2.62723	-0.985559	0.44226	0.126751	-0.535607	0.501941	0.053358	0.303878	-0.170774	-0.452978	0.00047415	0.478387
HSD17B7	0.686095	0.69823	1.00446	1.69435	0.370008	-0.550135	-0.735758	-0.577661	-0.781374	-1.78491	0.909186	2.36255	-0.385638	-0.470202	0.439658	-0.466042	-0.659316	-1.07165	-0.493883	-0.18797
INSIG1	0.635845	0.541261	0.311079	1.04236	0.106171	0.752749	-1.30017	-1.0488	-1.1072	-0.686629	0.780959	2.95357	-0.166557	0.398136	-0.720617	-0.316343	-0.182338	-1.1677	-0.115435	-0.710329
USP6NL	1.14066	-0.252497	2.02062	1.11855	-2.28222	0.116031	-0.877691	-0.343884	1.02042	0.827133	-1.2556	0.584419	-0.7329	0.511413	-0.861417	-0.354064	0.0712861	-0.739385	-0.234475	0.523591
FGD6	0.565506	-0.880559	0.575011	2.11064	-2.07436	-0.366298	-0.27847	0.355841	0.982985	-0.0274909	-1.26699	1.64007	-0.30937	-0.127389	-0.0411053	-0.6074	0.149907	-1.34978	0.942828	0.00641966
NUP50	1.4007	0.308474	0.769471	2.83888	0.173221	0.940265	0.00294197	-1.09869	-0.565766	-0.991205	-1.15715	0.907072	-0.572534	-0.0983532	-0.00322262	-0.320722	0.0380719	-1.02945	-0.682827	-0.859176
PGD	1.08309	1.01086	-0.650227	2.38815	0.129436	2.07831	-1.13088	0.172157	0.0738502	-0.439375	-0.705022	0.488747	-0.854858	-0.313441	-0.894949	-0.25537	-0.668358	-0.698263	0.34781	-1.16167
C5orf15	1.21331	-0.418097	0.380492	2.49143	-0.121219	1.91328	-0.0217589	-0.407231	-0.698912	0.00524188	0.234	0.60746	-0.281021	-0.373107	-0.37	-0.958858	-0.673547	-0.3905	-0.0417606	-2.0892
PGAM1	0.874829	0.656121	0.0336811	1.37723	0.193594	1.54859	-0.855131	-0.125979	-0.0462651	-0.321837	-1.57894	1.56667	0.659645	0.343692	0.659213	-1.0925	-0.764033	-1.35031	-0.0228873	-1.75538
RPS6KA4	0.40969	0.0955565	-0.438601	1.83928	0.381228	1.7213	-1.34835	0.33643	0.077888	-0.215279	-1.90536	1.41861	0.331616	-0.589373	0.482112	0.232372	0.0614179	-1.59642	-0.211447	-1.08268
B4GALT1	-0.13782	-0.847991	0.473206	1.76111	-0.265043	1.21104	-0.634906	-0.0887108	0.463889	-0.108736	-1.60637	1.80735	0.606004	-1.44033	0.743478	-1.24013	0.770039	-1.15559	0.295123	-0.605611
SLC2A1	-0.509017	-0.673655	0.332478	1.88252	-0.668096	2.49489	-1.0179	0.116749	0.48697	0.227498	-0.435604	1.69327	0.221614	-1.24134	-0.257525	-0.813789	-0.381698	-0.955644	-0.0735314	-0.428181
PLIN3	-0.25574	-0.702389	-0.268962	1.79916	-0.422924	2.23954	-0.497688	0.690579	1.05593	-0.0724322	-0.853917	1.68241	-0.00733271	-0.627033	-0.413639	-0.471911	-0.50209	-1.65473	0.141002	-0.857833
LHX2	0.2106	0.777728	-0.776887	1.29814	0.560583	1.0929	0.949172	-2.05555	-0.103678	0.544838	1.21147	-0.396008	-0.775922	-0.306436	-0.4058	-0.789779	0.919812	-2.13265	0.636765	-0.459295
C1QB	0.242591	0.676583	0.716856	1.27808	0.168559	1.32184	-0.248876	-0.454543	0.946511	-0.733857	0.680104	-0.868927	0.771715	-1.417	0.0730276	0.202175	0.584572	-2.53792	0.0819624	-1.48346
PCYT1B	-0.338898	1.41603	1.01481	1.47436	0.990817	0.0850574	-0.0530009	-0.732129	0.198357	0.0961532	-1.04771	-0.80713	0.80626	-0.987264	0.0271394	0.210062	0.921442	-2.77476	-0.313526	-0.18607
ADRA1A	0.34052	0.692167	0.80932	0.866867	1.44205	-1.15149	0.463419	0.227145	0.78168	-0.723739	-0.41339	0.251059	0.588436	-2.32479	0.568677	-1.70065	0.200916	-1.6039	0.610759	0.0749266
LRRC63	0.627645	0.33686	0.793034	-0.21393	0.89002	1.24815	-1.9444	0.591099	0.0427706	-0.433738	0.891613	-0.0286608	0.213626	-2.11158	0.83609	-0.1267	0.437718	-2.00113	-0.708069	0.659589
PSMG3	-0.21484	-0.341621	-0.226283	-0.399715	0.918118	0.990886	-0.24013	0.315025	0.207997	-2.54004	-0.384785	1.06061	0.623076	0.468772	1.22216	1.15691	-0.791468	0.180156	0.173986	-2.17881
COPS6	-0.330602	0.208786	-1.09107	0.12072	2.38458	0.150826	-0.841969	1.19148	0.404884	-0.379136	-0.0877608	1.43323	0.194678	-0.0441022	1.08818	-0.305409	-1.21983	-0.314222	-0.49235	-2.07092
PDE6D	1.57585	-0.0115877	0.098014	0.736491	2.15314	1.13299	0.607223	-0.498757	-1.14382	-0.741334	-1.04754	0.705581	0.525514	0.319053	0.5366	-1.24219	-0.562815	-1.10461	-0.743173	-1.29463
TUBG1	0.902404	0.198727	0.15107	1.37088	1.24741	0.793778	-0.763131	-0.422538	0.422229	-1.60299	-1.77209	0.980064	1.13929	-0.305985	1.16959	-0.630962	-1.27556	-0.269329	-0.0736283	-1.25922
NUP62	0.647217	0.61365	0.753126	0.885596	1.79508	2.00692	-0.689033	-1.7816	-0.181654	-0.773489	-0.880731	-0.340051	0.209788	-0.45367	0.882483	-1.20459	-0.695988	0.551999	-0.313227	-1.03183
PFDN2	0.241407	-0.502126	-0.0481906	0.553435	0.423991	2.81465	-0.751148	-0.170983	-0.885201	-0.338922	-0.901817	0.213189	1.09272	-0.997901	1.5552	-1.19407	-0.400024	-0.98037	0.744189	-0.468036
PARK7	0.932033	0.229875	-0.0825992	1.24588	0.316447	1.65919	-0.877564	0.862653	-0.575624	-0.438835	-0.799031	0.0385046	0.303309	0.443682	1.35791	-1.69241	-0.6996	-0.182235	0.280077	-2.32166
NAA50	0.55869	-0.050172	0.264805	1.59789	0.201733	2.06207	-0.493051	-0.255473	-0.93921	-0.402178	-1.33181	1.13464	-0.320992	0.862398	0.925454	-1.81059	0.325759	-0.739713	-0.317331	-1.27292
ELP5	-0.943753	-0.824408	-0.424597	0.59496	0.613512	1.61386	0.811028	-0.173932	-0.149992	0.0815815	-0.714519	-1.60155	0.241025	0.45627	-0.298419	-0.715203	-0.480179	2.89384	-0.197946	-0.781578
PLPP3	0.894403	0.0495417	-0.470626	0.542855	1.58684	2.59807	0.100506	-0.350524	-0.382113	-0.68165	-1.31832	-1.52694	0.391528	-0.698526	0.0353076	-0.601241	-0.244895	0.531125	0.809288	-1.26463
SYN1	0.828357	0.330577	-0.557662	0.353977	0.590796	1.84684	0.0685689	-0.582299	-0.721352	0.818787	-1.30168	-2.85731	-0.134188	-0.128223	0.898345	-0.579894	-0.149411	1.00136	0.570107	-0.295704
MYRF	1.17765	0.471226	-2.11219	0.627663	0.487858	1.54576	-0.948549	-0.191323	-0.358149	0.755698	-0.576864	0.627504	0.300652	-1.22487	-1.52774	0.279374	-1.16644	1.40797	-0.022399	0.447165
TPRA1	-0.223298	0.277508	-1.93973	0.307059	1.56349	2.35889	-0.856303	0.577814	-0.00832192	-0.793939	-0.244258	1.00877	0.533538	-1.25559	-0.58769	-0.342757	-0.71772	1.0059	-0.0474126	-0.615947
NDST1	1.06888	0.148869	-1.02917	0.878943	1.9333	2.07221	-0.576527	0.415783	0.377635	-0.484483	-0.68791	1.09121	0.00917688	-1.6471	-1.04578	-0.916921	-0.576918	-0.187057	-0.258074	-0.586082
RHOD	0.122009	0.393621	-0.388906	0.840894	0.716633	1.77449	-1.64879	0.158242	0.540858	0.583476	0.172077	0.658752	-0.643039	0.0218728	0.0820693	-0.0720509	-3.04201	0.255326	0.278683	-0.804207
SPRYD3	0.998316	1.25163	-0.472822	0.940167	1.9333	1.35917	-1.53669	-0.366877	0.311544	0.810395	0.00618186	0.39765	-0.734824	-0.548719	-1.46553	-0.843441	-1.4395	0.0646671	0.0793752	-0.743986
ORAI3	0.605594	1.16998	0.00891194	0.15005	1.53711	1.91623	-0.386392	0.861739	-0.624871	0.212768	-0.467878	0.417675	-0.247681	-0.0147683	-1.54797	0.865716	-1.73291	-0.228648	-1.48403	-1.01063
NF2	0.803593	0.447514	-0.501332	1.22454	1.13657	1.42166	-0.839134	1.33917	0.391538	0.0738356	-1.83195	0.0401477	0.63883	0.561365	-0.815339	-0.796745	-1.87069	0.290771	-0.856121	-0.858214
ZDHHC18	-0.390196	-0.0686457	-0.282257	-0.18622	0.737448	3.47611	-0.298933	-0.0194776	-0.271595	-0.457753	-0.109824	1.24372	0.860575	-0.171152	-0.221408	-0.594332	-0.563111	-0.568841	-1.30407	-0.810039
MSL1	0.36127	-0.481084	-0.0287236	-0.33338	-0.0866191	2.65468	-0.788434	-0.667182	-0.0127645	-0.292039	0.368922	1.73763	0.918338	-0.27234	0.224063	-0.948904	-1.86488	0.57302	-1.21117	0.1496
CREB3	0.430029	-0.685241	0.0264481	0.999471	1.69557	2.12113	-0.705555	0.284936	-0.329421	-0.879401	0.615997	0.999262	0.303245	-0.59861	0.850997	-1.21837	-1.37258	-0.52972	-1.38685	-0.621327
PAF1	0.282965	0.290564	0.0999818	1.36667	1.55233	2.0192	-1.09606	0.467895	-0.469972	-0.596049	0.979287	0.432138	0.254842	-0.6577	0.117936	-1.55904	-1.65371	-0.0661986	-0.670727	-1.09435
LRRC42	-0.375672	0.141662	-0.998433	0.873657	0.965506	2.24639	-1.0948	0.834952	-0.989455	-0.350901	0.0954194	1.24	0.152762	-0.521336	1.07506	-1.63728	-1.16646	0.198299	0.282395	-0.971769
MID1IP1	0.658491	0.538187	0.0341815	1.23863	0.377044	2.41009	-1.13708	0.908588	-0.904348	-1.70975	-0.0708594	0.370777	0.0429634	0.0559073	0.8147	-1.42263	-1.35902	-0.352945	-0.28545	-0.207482
CMTM6	0.410822	-0.813485	0.34987	1.42439	-0.0884214	3.07871	-0.793121	0.280527	-0.404526	0.2809	-0.594203	1.0336	-0.781308	0.467377	-0.736833	-1.4128	-0.439443	-0.479231	-0.213614	-0.569208
PFKFB4	-0.337541	-1.23495	-0.687281	-0.0084437	0.503111	3.19481	-0.570784	0.521909	-0.481067	-0.144559	0.570717	1.25637	-0.661534	0.00881406	-0.135626	-1.00148	-1.05794	0.857918	0.00715376	-0.599605
ANAPC13	-0.483755	1.65761	-1.63401	0.00574946	1.25424	2.30582	-1.15159	-0.141309	-0.481985	0.844704	-0.429204	0.393469	0.00131167	-0.187006	0.543728	-0.676219	-0.536186	-0.403647	0.608031	-1.48975
COPS9	0.739549	0.619416	-0.298194	-0.350078	1.11491	1.85409	-0.6915	0.256398	-0.234577	0.15209	0.585277	0.317658	0.695459	0.335474	0.229259	-0.640816	-1.4337	0.117368	-0.397359	-2.97072
GUK1	0.519252	0.587122	-0.227789	0.750782	1.80408	2.3663	-0.723157	-0.480585	-0.553414	0.0466375	-0.458799	1.29265	0.489588	-0.878864	-0.141394	-0.314261	-1.30065	-0.838922	-0.436935	-1.50165
TMEM258	0.588572	0.984086	-0.0168637	1.00371	1.6457	1.931	-1.0828	-0.554928	0.276893	-0.381366	-0.0743372	0.0439672	0.775882	-0.123588	0.035361	-1.05548	-1.63279	0.000111301	-0.363131	-1.99999
ST7	1.49294	1.07389	-0.32523	1.15677	2.02132	1.06137	-1.27817	-0.270146	-0.756501	-0.291076	0.0385161	0.435775	-1.50451	0.58966	-0.398046	-0.572106	-1.10087	0.41182	-0.483867	-1.30155
TRIM16	0.439681	1.79937	-0.104174	0.341918	2.17997	1.42999	-0.864056	0.258185	-0.883675	-0.986952	-0.0646203	0.128959	-1.1556	0.034253	0.477707	-1.03705	-1.65576	0.533409	-0.369196	-0.502358
CTSE	1.06695	1.6195	0.198096	-0.259225	1.86947	2.17374	-0.540994	-0.306204	0.175965	0.334172	-0.658386	0.29133	-1.31151	-1.25953	-0.723175	-0.751781	-1.05157	-0.56416	-0.165862	-0.136823
MGAT2	1.21723	1.13787	0.626588	-0.187679	0.584772	2.43054	-0.853655	-0.856655	1.03201	-0.233434	-0.591732	0.709955	-1.44461	-0.53864	0.357273	-0.531905	-1.61991	-0.284705	-0.191324	-0.761977
ACOX3	0.599772	-1.12396	-0.482138	1.9225	0.602378	0.294917	0.163663	1.30239	0.390818	0.294191	0.896707	0.0152986	-0.32273	0.0902431	0.956591	-2.4396	-1.30281	-0.671169	-0.145909	-1.04116
TLE1	0.113449	-0.642527	0.258555	2.57376	-1.28895	-0.860432	0.206369	1.84755	0.579088	0.375429	0.84484	-0.742048	-0.992774	-0.881895	-0.150106	-1.52535	-0.0120082	0.0721487	0.378505	-0.153602
HGSNAT	-0.239756	0.249693	-1.36698	1.47903	1.74231	0.537833	-0.366911	-0.207446	0.821944	0.454908	1.74384	0.163588	-1.52217	-0.678131	-2.03808	0.286636	-0.081597	-0.296633	-0.216291	-0.465779
EIF3A	0.892354	-0.387135	-0.861506	2.33337	1.47452	0.845505	-1.05096	1.58769	0.365426	-0.263113	0.277352	-1.49006	-0.314739	-0.010411	-0.948569	-0.205274	-0.743145	-0.00443447	-0.484822	-1.01205
HBP1	-0.405794	-0.145219	-0.45918	0.152752	-0.412763	1.93525	0.0778291	1.88738	0.467145	1.27764	0.666805	1.13762	-0.916414	0.0461068	-1.98661	-0.845587	-0.873812	-0.542996	-0.0925434	-0.967614
CCNY	0.800312	-0.26677	-0.992941	0.0809832	-0.434978	0.611017	-0.319801	1.52417	1.00839	1.50059	0.90899	0.151878	-2.10835	0.0984311	-1.44143	0.175915	-1.68918	0.543072	0.408026	-0.558331
PDP1	0.211006	-0.21464	0.793998	1.90227	0.25884	1.72326	-1.48409	0.840374	0.290229	0.214758	0.799059	0.0864917	-0.887002	-1.20013	-1.42756	-0.664523	-0.931885	-0.861542	-0.581641	1.13273
STK40	-0.941443	-0.658309	0.115847	1.57519	-0.372253	2.75313	-0.630143	1.25161	0.35879	0.240462	0.576525	0.712509	-0.517055	-0.278965	-0.741307	-1.02948	-0.810315	-1.35329	-0.164569	-0.0869374
ADGRE5	-0.358	-0.304664	-0.154641	1.033	0.0834844	2.73325	-0.661334	0.179492	0.851505	-0.202236	1.68876	0.437678	0.123035	-0.696119	-0.747616	-0.944956	-1.85325	-0.581172	-0.237384	-0.388825
IQCK	2.06128	-0.474268	-0.637616	1.26637	-1.30694	-0.373198	0.133229	1.01096	-0.0170721	1.07691	-0.499495	0.200775	-1.20677	1.41256	0.123642	0.577377	-1.00229	-0.727602	0.0674261	-1.68528
FOLR1	1.31259	0.20341	0.151734	0.262185	0.395675	1.20708	-0.411165	-0.384684	0.361599	0.266285	-0.45373	-0.454629	-1.2208	0.835908	0.564257	-0.57863	-0.403097	1.58913	-0.241334	-3.00179
COMT	1.23086	0.772794	-0.714757	0.800657	1.00445	0.890435	0.401258	0.446522	0.597602	0.0772269	-1.2332	0.79867	-1.21088	-1.01683	-0.453992	0.968695	-1.39522	0.867628	-0.825226	-2.0067
HPSE	0.501629	-0.972407	0.46132	1.9812	-1.76067	2.92889	-0.452512	0.0953313	0.168458	-0.643284	-0.138894	-0.285566	-0.60529	-0.217771	0.0842514	0.199527	-0.028736	-0.694216	-0.0948367	-0.52642
DHRS9	-1.39264	-1.58209	-0.329625	1.44969	-0.904263	2.14697	0.21816	0.101487	0.00266041	-0.76519	-0.285678	1.85364	0.485924	-0.480216	0.693903	-0.573955	0.457769	-0.792096	0.394651	-0.699108
TNFRSF1A	-1.15985	-1.3745	-0.969231	0.980399	-0.488376	2.72931	-0.0758581	1.46048	0.640201	-0.0768248	-0.366131	0.76057	-0.00256482	-0.978977	0.338553	-0.0582362	-0.0990379	-0.750755	0.497323	-1.0065
TATDN2	-0.278573	-0.311014	0.353375	-0.573537	-0.297379	2.22537	0.581291	1.48275	1.29837	-1.43589	0.4569	-0.0716665	-0.198148	0.072832	-0.497165	0.0863845	-0.0777525	-2.2819	0.50041	-1.03466
LHFPL2	0.340464	-1.14022	-1.12381	0.341351	0.122167	2.01256	-0.0449598	0.801356	0.964147	-0.482857	-0.960205	2.2534	-0.49327	-0.411894	-1.51979	0.0194849	0.325058	-1.12762	0.397263	-0.272626
SLC45A4	0.877193	-0.295928	-0.548259	0.223335	0.241105	3.05126	-0.829312	0.368229	0.899314	0.12766	-0.338718	1.06349	-0.488488	-1.40256	-0.624966	-0.506407	-0.0459764	-1.61274	-0.254672	0.0964492
ELF2	-0.559248	0.0185645	0.961996	0.452641	-0.207595	2.30637	0.579226	0.602522	0.134478	-0.979844	-0.0457008	-0.624543	-1.50836	1.85185	0.188879	-1.26264	0.266551	0.105236	-0.907097	-1.37328
ARL11	-0.867824	0.493949	2.0477	-0.353009	-0.697661	2.49052	0.819373	0.152097	0.33535	-0.1568	-0.000137672	0.0505852	-0.909458	0.780604	-0.178578	-1.47924	-1.11411	-0.734856	0.157604	-0.836114
CREG1	-0.401423	-0.941412	-0.462742	0.489628	-0.197153	2.89309	0.0552324	0.901515	-0.379872	0.758478	1.13145	-1.18149	-0.99238	-0.438532	-1.01545	0.0473463	0.56076	0.152042	0.472495	-1.45159
SLC35F6	-0.348636	0.570951	-0.418533	0.777635	1.10632	2.92264	-0.447858	0.535653	-0.91746	-0.771411	-0.0395946	0.963192	0.434091	-0.345565	-0.252611	-0.427166	-0.431173	-1.50186	0.0590525	-1.46767
OST4	0.224045	0.736395	-0.853541	1.12992	0.728607	2.46252	-0.707694	0.754797	-0.825122	0.0782283	0.455552	0.884496	-0.294241	-0.0813082	-0.456488	-0.908734	-0.684946	-0.30937	-0.016324	-2.31679
ARL8B	-0.250888	0.109907	-0.50988	0.390647	-0.196764	3.15772	-0.133614	1.01728	0.396747	0.10377	-0.99021	1.30405	-0.315784	-0.262205	-0.624996	-0.218725	0.0889078	-1.45021	-0.270639	-1.34512
FTL	-0.650856	0.874592	-0.587271	0.476182	0.301446	2.85573	-0.00413646	0.520386	-0.170755	0.302844	-0.27377	0.398925	0.0203711	-0.993918	-0.927476	0.12602	0.666115	-0.806061	0.189854	-2.31822
IDUA	-0.722572	0.727136	-0.393323	-1.79705	1.69255	0.438432	0.347344	-0.812009	-1.31819	0.0457157	0.887655	-1.06355	-0.187061	-0.454024	0.393379	2.46522	-0.431546	0.281263	-0.453329	0.353961
BUD23	-0.0729331	-0.642213	-0.0128865	-0.755007	3.34143	-0.364966	-0.22996	-0.437487	-0.769053	-0.696817	0.223068	-1.18192	-0.0390665	0.384499	0.666565	1.20596	-0.993872	0.464321	0.542655	-0.632321
LRP12	-1.42311	-0.184276	-1.14026	-0.607969	0.375457	1.33331	0.614949	1.27644	-1.82895	-0.851951	-0.00642663	-1.47384	1.39081	0.809068	-0.0683474	0.666212	1.40194	-0.0816795	0.088893	-0.29028
TMEM252	-1.6623	1.33383	0.302217	-0.859313	1.07992	-0.86883	0.532275	1.99476	-1.81353	-0.423356	-0.546015	-0.0726722	0.108464	0.210193	0.274317	0.686247	0.981373	0.12045	0.0671834	-1.44521
IL12A	0.73904	1.36888	0.590461	0.950534	0.7238	-0.16511	-1.95746	-1.18342	-0.477921	-0.515681	-2.07811	0.112016	1.14284	0.0242908	0.47827	0.505535	-0.189425	1.17247	-1.23186	-0.00914022
ART3	1.65436	1.3528	0.697312	1.4564	1.08788	-0.626921	-0.533141	-0.938142	0.36078	-0.255722	-0.213353	-2.43246	-0.704173	0.466152	-0.0322042	-0.117474	-0.294003	0.775025	-0.676277	-1.02685
CPED1	1.82045	1.10863	0.0593257	0.557528	2.24877	-1.21888	-0.550819	-0.26172	0.754658	-1.15727	-1.15504	-1.72839	-0.0700374	0.341626	-0.875546	0.250427	0.0103112	0.0189744	-0.208225	0.0552179
PGM5	1.23842	2.0233	0.535943	0.194456	2.32641	-0.822001	0.0662164	-0.967209	0.396463	-0.332698	-1.18652	-1.68469	-0.0609388	0.253724	-0.835191	-0.60433	-0.274713	0.253165	-0.483938	-0.035868
SHISA3	0.455148	0.974405	1.85295	0.829192	0.0663151	0.602395	0.0963892	-0.934485	-0.895097	-0.393302	-1.6596	-1.38638	-0.621962	-1.22423	1.21094	1.02944	0.0947994	1.08009	-0.0591502	-1.11785
KLRB1	1.24576	1.09915	1.42724	-0.092161	-0.415613	1.6289	0.859169	-0.784999	-0.217223	0.265909	-2.06524	-1.57323	0.184116	-0.845432	0.509999	0.271872	0.518175	-0.906949	-0.126536	-0.982911
CCR5	1.08832	1.01723	1.18055	0.744928	1.09492	1.09145	-0.400142	-0.462894	0.21655	-0.0978843	-2.44747	-1.55414	0.311258	-1.17519	0.141961	0.188495	0.44034	-1.00163	0.445724	-0.822383
NEIL2	0.897779	1.12049	0.994841	0.804218	1.40503	1.15436	-0.19033	0.251317	-0.5607	0.294869	-2.08162	-1.74352	-0.332406	-1.27086	-0.123065	0.904795	-0.312436	0.163185	-0.192286	-1.18367
SDAD1	1.07029	0.321643	-0.0948966	1.21803	1.01981	0.730175	-0.813389	1.47325	0.593691	-0.211951	-2.28008	-0.617588	-0.765982	-0.29244	-0.216738	1.09992	-0.571177	-1.60624	0.692501	-0.748823
EPB41L2	1.40421	0.954165	0.549734	2.56512	1.06808	0.586327	-1.04936	-0.160658	0.255556	-1.37361	-0.417745	-1.42678	-0.314919	-0.637211	-0.516025	0.559116	-0.137217	-0.390441	-0.595171	-0.923176
LYZ	1.6332	1.10459	0.725787	1.05468	1.7963	0.908549	-0.308367	-0.471532	0.504647	-0.859102	-2.31131	-0.458368	-0.327199	-0.474376	-0.903474	-0.26925	0.148491	-1.02555	0.04437	-0.512076
GADD45G	0.966809	0.916933	-0.332716	1.31535	-0.132665	1.00143	-0.474828	-0.228491	-0.139329	-1.22722	-2.6031	-0.470833	-0.597696	-0.225246	2.01403	-0.498706	0.297233	0.625253	0.314439	-0.520649
TNS4	-0.622235	0.542612	-1.06908	2.14751	1.18196	0.456316	-0.221716	0.770878	0.506929	0.543931	-1.79732	-1.23854	-0.1842	-1.63105	0.859992	-0.925413	0.193505	0.77381	-0.0216437	-0.266251
SRRT	0.171708	-0.216554	0.72026	0.64613	1.12892	0.562588	-1.22503	-0.196107	-0.365845	-2.92564	-0.450827	-0.909748	0.766731	-0.641574	1.87007	0.768558	0.174953	-0.0410811	0.0923942	0.0700979
CD68	-2.18334	0.549374	0.407307	0.836033	0.512203	1.37942	-0.493911	0.181817	-0.694835	-2.19131	0.847257	-0.542867	0.980192	0.339256	-0.228789	1.51073	-0.303883	-0.574736	0.303766	-0.633692
HTR2B	0.74351	1.28894	1.01521	0.858728	1.2482	-0.205186	-1.02874	-1.34433	0.273536	-1.08853	0.354563	-1.43068	-0.935589	-0.780182	-1.44608	0.796619	1.07742	0.0568868	-0.620766	1.16648
CLEC4A	0.806947	0.560356	0.662985	1.35746	0.753053	1.04979	0.234905	-1.85972	0.221878	-0.753598	-0.0994321	-1.91108	0.346018	-0.430573	-2.12738	0.773254	0.599051	-0.605329	0.0565148	0.364896
PPFIA4	-0.381592	2.45982	0.638815	1.31145	0.877137	0.141379	0.106155	0.224858	0.0711666	-1.54294	-0.531794	-1.45879	0.0708848	-1.68099	-1.11391	0.32786	0.329309	-0.496998	-0.0523312	0.7005
SLC38A6	0.348017	1.63617	1.43038	-0.284511	0.410916	0.318481	-0.291908	-0.0520568	0.0120797	-1.37858	-0.802516	-0.808743	-0.627066	-1.55027	-0.517604	1.80376	1.2147	-1.56991	0.420496	0.288172
PPP1R35	-0.789333	-0.977108	-0.263109	-1.0008	0.504492	1.82312	-0.181152	-0.214253	-0.834115	-0.419493	0.988405	-0.0166796	1.34097	-0.993599	1.94524	1.24419	-1.08026	0.525388	-0.769242	-0.832654
CCNL1	-1.25516	-0.607616	0.454854	-0.685422	-1.09762	0.636548	-0.105068	-1.82836	-0.923767	-0.290032	1.84581	-0.176277	0.736899	-0.381145	0.525152	1.48279	0.78905	0.331353	-0.949496	1.49751
ARHGEF2	-1.3084	-0.660435	-0.293202	-1.0074	0.335134	2.58665	-0.19766	-1.73444	-0.171521	-0.309552	0.813588	0.775603	0.6645	-0.676916	0.126512	-0.306928	0.902167	0.0648077	-0.942492	1.33999
DNAH17	-1.03551	-0.306076	0.351614	-0.520529	0.549563	3.11808	0.383422	-1.63053	-0.569934	-0.873891	-0.0922954	-0.445217	-0.0978075	-0.313235	0.96753	0.640116	0.699223	-0.0494256	-1.1186	0.343503
CLK4	0.492651	1.75791	1.22804	-1.58178	0.826587	0.502247	1.08784	-1.81457	-0.873216	0.221062	0.197164	-0.627234	-0.729647	0.0521045	-0.838924	1.11492	0.407307	0.153567	-1.52569	-0.0503465
THAP2	1.75555	0.305708	1.19201	-1.6108	1.81018	1.08452	1.22626	-1.39051	-0.293632	-0.788146	-0.523351	-1.3973	-0.321892	-0.059993	0.0965853	-0.573254	-0.200333	0.454273	-0.37318	-0.392682
CCDC50	-1.13509	-1.17035	1.10412	-1.6341	0.693562	1.37113	0.710655	-0.471291	-0.317955	0.443504	0.567153	-0.308722	-1.32996	-0.860276	-0.147436	-0.313723	0.868346	0.148616	-0.461304	2.24313
AGPAT1	0.852259	-0.991726	0.636285	-1.36358	1.60013	1.07228	-0.166153	-0.907839	-0.534913	0.551261	0.494767	-0.667379	0.159691	-0.935447	0.63065	-0.936081	-1.30915	1.74705	-1.02456	1.09245
FABP4	-0.246184	-1.16221	-1.1464	0.414151	0.327795	-0.123638	-0.659157	-1.43947	0.338748	0.343216	2.07138	-1.53653	-0.999689	0.264007	0.836751	-0.550315	0.848706	-0.225546	0.968707	1.67568
ZNF638	1.75239	0.152643	0.491416	0.792793	-0.94315	0.273817	-0.0685713	0.644673	-0.479365	-0.196358	0.238651	-2.62038	-0.950728	0.0714306	-0.726997	0.282581	0.701595	0.28507	-1.32112	1.61961
NOTCH1	0.253885	-0.366293	1.13738	1.35229	-0.293328	1.11816	-0.47534	-0.283088	-0.843398	-0.38546	-0.370771	-2.78982	-0.00529105	1.32644	-0.326607	-0.34123	0.287447	0.0302962	-0.677762	1.65248
CLN8	0.26722	0.29166	1.29102	0.541441	-0.194309	-0.319894	-0.415177	-1.12974	0.817528	-0.304519	-0.534495	-2.64695	0.859983	-0.00326543	0.58027	0.952941	0.600401	-1.83694	-0.0500834	1.2329
KIF5A	-0.136267	0.0800722	0.284094	0.873765	1.37395	0.137518	0.685965	-1.60862	-0.324224	-0.822184	0.0959584	-3.19385	0.601661	0.869654	0.138125	-0.507298	0.0766119	0.155808	0.668018	0.551248
PLXNB3	1.40904	1.03031	0.881855	-0.72776	2.58124	0.425619	-0.579098	-0.268524	0.606974	-0.39234	-0.354746	-1.26154	-0.625072	-0.110523	-1.6086	-0.215237	0.326093	-1.01108	-0.754556	0.647943
TSPYL4	0.858179	1.31001	0.800853	0.518098	1.7553	0.578586	-0.670635	-0.910626	-1.15141	0.382404	0.721221	-2.42872	-1.33053	-0.139821	-0.780459	-0.251834	0.350943	-0.0259511	-0.228611	0.642997
MAP6	1.07533	0.823642	0.205102	-0.126016	1.982	1.15195	-0.519231	-0.334708	0.45239	-0.0891574	0.461209	-2.35111	-1.98381	-0.340205	-0.76699	0.291709	-0.543448	-0.217402	0.183382	0.645374
BAIAP2	0.270222	0.932622	-0.563827	-0.126715	1.82349	0.855335	-1.52184	0.284586	0.632184	0.934005	0.889131	-2.58396	-1.08949	0.138108	-0.845128	-0.347184	-0.186106	-0.292049	0.559618	0.236994
DGCR6	-0.000511313	0.805652	0.693182	0.964025	1.34487	-0.9184	-1.03677	-2.6217	0.64271	0.466768	-0.00273719	-0.21495	-0.670615	-0.0871801	-0.320879	0.514786	-1.78386	0.691455	0.791245	0.742912
S100A1	0.0695692	-0.327015	0.479982	0.577698	1.11108	-0.562415	-0.874669	-1.1378	0.174042	0.109959	1.13721	-0.175049	-1.70662	0.0897071	-0.112581	0.201879	-1.70575	0.682148	-0.606397	2.57502
ACIN1	0.0497311	1.29305	0.5396	0.0190283	0.503724	-0.494141	-0.260168	-1.32273	0.216809	-1.3711	1.17387	-1.29266	-0.291507	-0.499181	-0.429334	0.348487	-0.382546	0.307821	-0.935005	2.82625
CACNA1B	-1.3648	0.538906	1.25329	1.6254	1.06433	-1.37676	-1.18185	0.0760738	-1.30425	0.606124	0.816792	0.287262	-1.28465	0.365575	0.561959	-0.0570117	1.13426	0.00866273	-1.34857	-0.420743
DNMT3A	0.206654	0.826675	1.58698	0.527548	0.201537	0.087007	-0.408233	-0.203433	-1.99989	0.235717	1.06032	-1.81728	0.460844	-0.840679	-0.226194	-0.765997	0.611021	-0.615196	-0.852017	1.92462
FNBP4	0.509863	0.934708	1.83249	0.581305	1.1715	-0.594751	-0.520154	-0.569098	-1.72007	-1.18227	1.35716	-1.09941	-0.622347	-0.616998	-0.119843	0.382832	0.162182	-0.174131	-1.1634	1.45044
KRTCAP2	-0.193178	1.21659	0.375492	0.815611	0.974778	0.0460691	-0.205356	-2.54685	-1.28126	-1.21028	1.10447	-1.3553	0.964421	-0.527525	0.360193	0.274471	0.234145	0.706899	-0.595702	0.842315
CCDC148	0.223443	1.26753	0.0820473	0.880178	1.4816	1.52426	-1.05716	-1.97673	-2.13284	-0.540942	-0.149846	0.16402	0.571027	-0.781332	0.169011	-0.0733673	0.298962	0.264868	-0.805342	0.590618
PTPN22	-0.55638	1.64025	2.5242	-0.79179	-0.274178	0.568099	0.84063	-1.79328	0.166693	-0.399445	-0.837011	-1.71489	0.300024	0.448748	-0.367673	-0.228727	0.432838	-0.0780772	-0.233909	0.353881
ZNF76	-1.14797	2.32726	1.7433	-1.14517	0.807568	0.273164	-0.756679	-1.07266	-0.371893	-0.648024	0.708405	-1.28926	0.666964	-0.565749	-0.880926	0.567583	0.703446	0.46829	-0.407037	0.0193865
RAPGEF6	-1.60887	0.52108	1.97823	-0.352982	-1.73989	1.86187	-0.148995	-1.53066	-0.0717358	0.582439	0.239981	0.0973785	0.953592	-0.968618	-0.345184	0.606135	0.108411	0.360758	0.0511946	-0.594142
TNNI2	0.106825	1.47535	0.984501	-1.20394	-0.466285	1.88611	0.906744	-1.60638	0.704838	-0.122714	-0.725426	-0.13061	0.427629	-0.0522645	-0.464055	0.219061	1.16459	-1.71758	-1.16451	-0.22188
MTMR14	-0.63314	0.781546	1.0811	-0.0186121	-2.2974	1.63706	0.811831	1.11921	-0.478988	0.272284	0.624624	-0.0818029	0.230903	0.642162	-2.00947	-0.378725	0.557527	-0.922159	-0.44843	-0.489529
CREBRF	-1.18206	1.16605	0.417608	-1.59264	-0.760853	1.4414	0.779617	0.482277	0.643098	0.956049	-0.414542	-0.159351	0.408465	-0.443645	-2.26293	0.87082	1.09048	-0.0150812	-0.534614	-0.890158
ARRDC3	0.0794102	0.872998	0.548348	0.875002	0.387039	1.84987	-1.08109	1.51119	-0.650005	0.986974	-1.76202	-0.394618	-1.40175	-0.454136	-1.64936	0.184616	0.097728	0.448305	-0.575791	0.127295
FNIP1	-0.53558	0.540144	-0.0317745	0.503311	-0.192297	2.88984	-0.79974	-0.699163	0.269008	0.683063	-0.000979313	1.37663	-1.17119	-0.23159	-1.80794	0.245225	0.286598	-0.705244	-0.897252	0.278931
ATP6V1C1	-1.1663	0.354406	0.257598	1.19084	0.758122	3.14315	-0.750808	-0.545404	-0.125056	0.310908	-0.0852229	0.466777	-1.11681	0.551266	-1.24043	-0.816919	-0.0502463	-0.713902	-0.11475	-0.307218
FZR1	1.40114	0.0162354	0.447522	0.756895	0.0540908	0.468872	0.274354	-0.181952	0.320456	-0.929837	1.36519	0.110654	1.2795	-0.11841	-1.53586	-1.45085	-1.85186	0.344215	-1.63606	0.865701
SLC27A6	1.15764	1.25153	1.39154	-0.787928	0.483687	1.04903	-0.498417	0.0706797	0.78686	0.228364	-0.318925	-0.555954	-0.279302	-0.244296	-2.50027	-1.30269	-1.11677	-0.237905	0.229938	1.1932
CYP4F22	0.38601	-0.0203319	0.889389	-0.0580234	0.840458	1.42429	-0.167108	0.187843	0.615464	0.380296	-0.916688	-0.735392	0.70836	0.723367	-2.43331	0.0311273	-2.48718	0.351797	-0.0298778	0.309503
CPNE1	0.31908	1.2084	0.732208	-1.64489	1.5887	1.56632	-1.19904	-0.0683772	0.131215	-1.55653	0.612986	-0.240132	0.665159	-0.364781	0.201918	0.689701	-0.804182	0.00951616	-1.77748	-0.0697973
EDNRB	1.98018	0.654477	-0.521476	0.0318924	1.60119	1.7507	-0.708668	-0.217937	0.269377	-2.10822	-0.215033	-1.41392	-0.468652	-0.188959	-0.55309	0.588781	0.369307	-0.254819	-0.716025	0.120901
PTGER2	1.62822	1.34179	-0.557209	0.391312	1.05734	1.22154	-1.15765	-0.278966	0.213999	-1.73985	-0.0587225	-1.27071	0.973896	-0.854627	-0.795737	0.351375	0.351204	0.914491	-1.35124	-0.38047
SMIM1	1.21925	0.558849	0.941095	0.318943	1.19851	0.56179	-0.571112	0.700134	0.138223	-0.371625	0.582101	-1.00283	-1.37099	-0.0849239	-0.452256	0.151899	-1.25416	1.3091	-2.59652	0.0245134
UBALD1	0.920684	0.412497	0.276617	-0.2581	1.40037	1.79491	-0.666437	-0.686028	-0.288569	-0.358514	2.64552	-0.79567	-0.28979	-0.762827	0.190142	-0.442876	-0.781803	-0.27331	-1.36444	-0.672369
POFUT2	1.20495	0.374798	0.34838	0.21223	1.20538	1.35917	-0.0486758	-1.66127	-0.156527	-0.886585	1.66771	-1.05029	-0.693076	-0.689396	-0.661039	0.20414	-0.388606	0.110078	-1.7724	1.32102
CSNK1E	1.13236	0.283679	0.713759	-0.0484711	1.9709	1.83528	-0.749453	-1.24006	-1.21381	-0.327721	1.29223	-1.04729	-0.499749	-0.849981	-0.49503	0.0991688	-0.0457164	0.115776	-1.39961	0.473742
PSD	-0.704525	1.40741	0.23403	-0.858413	1.75257	1.91241	-0.601513	-1.1883	-0.368555	0.873642	0.734036	-0.039991	0.104048	0.534838	-1.52747	-0.611423	-0.999886	-0.751181	-0.730703	0.828982
NATD1	-0.491866	1.23816	-0.5109	-0.714824	1.07197	2.35635	0.485967	0.593132	-0.574936	0.818834	1.29569	-1.44852	-0.905001	0.534253	-1.37265	-0.881289	-0.208683	-0.326124	-0.550186	-0.409374
SGSH	-0.613032	0.579138	-0.367955	0.158991	0.00136733	2.43701	0.244558	-0.860389	-0.576448	-1.15252	1.48993	-0.134044	-0.179651	-0.280361	-1.83987	1.02599	-0.467447	0.726632	-1.13927	0.94736
CSRNP1	-0.351289	-0.663103	0.111041	1.28022	0.0101836	2.68871	-0.739818	-0.510236	-0.880518	-0.249969	1.8949	-0.53919	0.0908535	-0.483508	-0.891791	-0.846223	-0.994608	1.10156	-0.204642	0.177419
SAMD4B	-0.38222	0.395813	0.105948	1.0259	2.16317	2.26935	-0.601855	-0.568035	-0.0634583	-0.492446	1.29764	-0.625007	-0.565917	-0.911017	-0.928845	-1.05122	-0.606885	-0.0282605	-0.996594	0.563935
C5AR2	-0.51452	0.236914	-0.563439	0.291048	1.06131	2.99258	-0.661511	-0.912702	0.33814	-1.37851	1.4406	0.0433823	-0.112104	-1.06804	-0.701235	-0.434222	-0.497963	-0.287968	-0.0847437	0.812993
SESTD1	0.978423	1.33328	1.41857	1.35316	1.05138	1.54074	-1.05604	-0.0220444	-1.44223	-0.47641	0.345166	-0.0326393	-1.39012	0.117285	-0.98512	-0.963893	-0.838248	-0.450529	-0.756388	0.275652
SEL1L3	1.55142	1.64407	1.61602	1.65837	0.445713	0.94007	-1.25801	0.277457	-0.185068	0.0948921	-0.554633	0.166132	-1.20584	-0.683868	-0.827888	-0.605777	-0.689152	-0.986075	-0.629459	-0.76837
DNASE2	0.778085	1.19568	1.26134	1.57883	0.802761	1.71122	-1.02942	0.0154367	-0.601458	0.292181	-0.232766	-1.23781	-0.527461	-0.672647	-1.59206	0.262946	-0.156228	0.124333	-0.317706	-1.65525
RFX5	0.760976	2.0401	2.19637	0.838364	0.957272	1.40642	-0.533824	-0.564937	-0.99647	-0.489741	-0.659342	-0.931486	-0.426418	-0.228526	-0.878586	-0.767547	-0.758483	0.0529322	-0.445643	-0.571429
SLC9A7	0.918227	1.58355	2.0795	1.31868	0.971279	1.10765	-0.45266	-1.7356	-0.854529	-0.148469	-0.444182	-0.860115	-0.0942502	-0.769884	-0.675507	0.0608	-0.570521	-0.150033	-0.270912	-1.01301
PRRC2A	1.69302	0.12035	1.64821	1.13672	1.24014	0.996083	-1.07963	0.0841205	0.161435	-0.427683	-0.731537	-0.332427	-0.0841063	-0.804045	0.172702	-2.25647	-0.755166	-0.137013	-1.02275	0.378046
HTR2A	0.759662	1.8763	0.950893	0.716318	1.49577	0.909285	-0.150109	-0.971391	-0.520007	0.238551	-1.46868	-1.05139	-1.17301	-0.245059	-0.258058	-2.00971	0.507738	0.0465014	0.130902	0.215483
ATG7	0.015113	1.11712	1.8752	1.43045	0.279263	1.45729	-1.06639	0.732532	0.582381	0.0971025	-1.80306	-0.255463	0.330655	-0.216064	-0.445839	-1.02822	-0.296738	-0.574678	-0.708717	-1.52194
IRF8	0.0778514	0.873969	2.47781	-0.0526079	-1.04162	1.82153	-0.180727	0.139197	-0.341111	0.199877	-1.67119	-0.194204	0.92886	-1.4251	0.439891	-0.318162	0.0281391	-0.176607	-1.08285	-0.502933
RASGEF1B	0.810832	0.686922	1.51071	1.55235	-1.44644	1.50447	-0.721525	0.608536	-1.45092	0.325256	0.259443	-1.58508	-0.199562	-1.0387	0.489872	-0.888378	-0.578798	0.506559	0.240823	-0.586373
BLNK	-0.465832	1.39148	2.49363	0.852366	-0.00726216	0.526914	1.13469	-0.0224526	-0.906196	-1.23553	0.117281	-0.609981	0.220169	-1.24847	-0.789336	-0.564507	-0.761581	1.23073	-0.537169	-0.818946
PHOSPHO1	0.689445	0.392425	0.978639	0.394004	1.09383	3.13745	-0.753055	-0.374551	-0.544279	-0.809128	-0.425537	-1.12079	-0.13812	-1.14797	-0.183683	-0.141759	0.711405	-0.815667	-0.711734	-0.230929
LILRB3	0.230997	0.461461	0.360581	1.16121	1.09648	3.01495	-0.688647	-0.0501936	0.383388	-1.31831	-0.00845886	-0.840523	-0.0191562	-1.55249	-0.178258	0.0969931	-0.188872	-0.805119	-0.791323	-0.364706
NLRP3	-0.0181064	0.463744	0.280639	0.843202	0.803205	3.47171	-1.23687	0.0698288	0.0320765	-0.729663	-0.138352	-0.626288	-0.103021	-0.14448	-1.23897	-0.036628	-0.0800176	-1.02685	-0.386248	-0.19891
PRCP	0.055419	0.569927	0.437964	0.445965	1.99975	3.05918	-0.506709	-0.0147879	0.0590055	-1.21356	-0.434089	-1.03521	-0.208689	-0.157356	-0.94215	-0.378493	-0.332489	-0.409189	-0.325787	-0.668709
SLC2A3	0.283616	0.815453	0.947277	0.904805	1.23885	3.13957	-0.458702	-0.558109	-0.6731	-0.616858	-0.059783	-1.43018	-0.121685	-0.412455	-0.587342	-0.469763	-0.514869	-0.342467	-0.646399	-0.437849
SEMA6B	0.540761	0.621954	0.129317	0.913899	2.09826	2.50605	-0.268556	-0.590736	0.0902329	-1.24496	-0.769927	0.0696061	0.316369	-1.51217	-0.731992	-0.38678	-0.0759901	-0.888153	-0.473384	-0.343807
NRG1	0.547276	0.417452	-0.397751	0.667128	1.82553	3.12656	-0.597303	-0.76486	0.0396367	-1.17178	-0.0966084	-0.873426	-0.753114	-0.287214	-0.203029	-0.120841	0.184477	-0.559896	-0.800147	-0.182089
GNG11	1.13269	1.03127	-0.334088	0.516587	2.07594	2.60769	-0.618081	-1.27197	-0.147209	-0.808711	-0.567923	-1.00955	-0.0747817	-0.303717	-0.441184	-0.224709	-0.740114	-0.129421	-0.327431	-0.365287
HGF	0.890334	0.730056	0.0304594	0.97012	1.93482	2.87196	-0.163587	-0.674096	-0.361457	-0.773462	-0.333747	-0.471471	-0.630998	-0.4572	-0.819704	-0.0337684	-0.630404	-0.910093	-0.651287	-0.516477
SERPINH1	1.49583	0.656955	-0.120194	0.908877	2.14122	2.47346	-0.449029	-0.143194	-0.712082	-0.863032	-0.465202	-0.943891	-0.352864	-0.555425	-0.45023	-0.486438	-0.46153	-0.494796	-0.287819	-0.890614
PADI4	0.488311	1.05809	0.508766	1.25904	1.37897	2.24128	-0.604269	-1.14795	-1.24024	-0.171967	-0.466589	0.745705	-1.22737	-1.25514	-1.31218	-0.124108	-0.0450274	-0.0809903	0.100221	-0.104571
LYST	0.366916	0.995634	1.26033	0.761635	1.40268	2.45482	-0.569953	-1.41962	-0.211777	-0.37383	-0.730231	0.745147	-0.867659	-0.635988	-1.18358	-0.624549	-0.0297516	-0.880196	-0.596715	0.136688
IL1A	-0.0680407	-0.123762	1.00996	1.86092	1.05332	2.50796	-0.204628	-1.2909	-0.409635	0.322842	-0.449456	-0.0402072	-1.36938	0.211805	-0.648871	0.144255	-0.678551	-1.33463	0.060628	-0.55362
PTPN12	0.984345	0.154735	0.260817	0.719957	1.87289	2.74317	0.0248305	-0.831168	-0.333885	0.0896901	-0.316178	0.266025	-1.33658	-0.814689	-0.554811	0.273404	-0.819409	-0.798159	-0.725289	-0.859691
AKIRIN2	0.275398	0.35682	1.2465	2.08484	0.354604	2.60445	-0.705579	-0.00461906	-0.206677	-0.182252	-0.0373971	-1.11089	-0.495934	-0.26451	-0.1389	-0.961314	-0.531393	-0.658312	-0.147889	-1.47695
LYN	0.866358	0.824559	1.23276	1.53903	0.659744	2.84566	-0.983319	-0.530832	-0.327166	-0.357799	-0.800566	-0.688595	-0.636647	-0.450273	-0.488125	-0.406107	-0.256786	-0.734525	-0.456254	-0.851124
MAP2K1	0.466632	0.550437	0.865682	1.47559	1.15181	2.93975	-0.997652	0.00765631	-0.244507	0.101251	-0.589272	-0.18617	-0.340788	-0.547076	-0.863167	-0.892281	-0.754726	-0.561575	-0.64247	-0.939134
PNRC1	-0.0600793	0.754101	1.1769	0.41782	0.741406	3.25448	-0.00225266	-0.0753717	-0.0545081	0.179105	-0.903964	-0.512637	-0.126444	-1.00755	-1.27483	-0.330704	-0.484984	-0.0854657	-0.408986	-1.19605
EHD1	-0.571086	-0.0571453	0.609773	0.684239	0.673899	3.59144	-0.7278	0.0436403	0.105638	0.42772	-0.865121	0.328642	-0.305562	-0.646874	-0.0358904	-0.5291	-0.989608	-0.619107	-0.318419	-0.799277
TBC1D15	0.31452	0.515297	0.364057	0.816555	1.35461	2.89599	-0.37729	-0.173401	-0.367611	0.409244	0.109438	-1.10137	-1.58318	-0.118364	-0.248225	-0.774102	-0.428397	0.524147	-1.10047	-1.03144
ELK1	0.225664	0.0715178	-0.392822	1.50472	0.823768	2.83371	-0.709662	0.75045	-0.756011	0.527737	-0.312879	-0.468941	-1.20993	-0.667694	-0.132144	-1.11177	-0.780322	0.857283	-0.0158546	-1.03681
IRF2BPL	0.554273	0.43885	0.0238452	0.122215	1.72639	3.03003	-0.869852	0.704548	-0.342626	0.00222109	-0.535443	-0.934117	0.238352	-0.681921	-0.944602	-0.91901	-0.939255	0.231156	-0.760445	-0.144605
RELA	0.833693	-0.0911916	0.0627645	1.80876	1.01052	2.60862	-0.976367	0.634339	-0.477528	-0.131348	0.758518	-0.686094	0.0282439	-0.963397	-0.379411	-0.836203	-1.01968	-0.468673	-0.708036	-1.00754
IFNAR1	0.597058	0.0971657	0.638596	1.30935	1.54699	2.60286	-0.391568	0.812202	-0.420991	-0.0141838	-0.540913	-0.938227	-0.355751	-0.221003	-1.08392	-0.687584	-0.493308	-0.113664	-0.749548	-1.59355
PDIA4	1.32218	0.515445	0.0110478	2.07949	1.36033	1.82042	-1.37609	-0.0223032	-0.447567	-0.861073	-1.22305	0.245174	0.134979	-0.323272	-0.237562	0.114884	-0.788063	-0.954511	-0.215157	-1.1553
SDF2L1	0.551874	1.17215	0.766685	1.28414	1.45421	1.89397	-1.21456	-0.383404	-0.34551	-0.983875	-1.24382	0.0441138	0.459692	-0.872656	0.562268	0.0915844	-0.554949	-1.09396	-0.0655027	-1.52245
FAM220A	0.768026	0.95131	0.0159669	1.03686	2.2265	2.14421	-0.436629	-0.991165	-0.639037	0.048541	-0.863498	-0.352127	-0.00412247	-0.5265	-0.499985	-0.0257938	-1.50218	-0.378361	0.228665	-1.20068
TMEM208	0.567231	0.547116	-0.337979	1.57494	1.78343	2.08941	-0.184635	0.325214	-0.745508	-0.839925	-0.891114	-0.410392	0.173245	-0.657911	0.352254	-0.162366	-1.68368	0.0999453	-0.0454701	-1.55379
SRP54	0.686487	0.0305321	0.0769132	1.93464	2.00459	2.07596	-0.902241	-0.166327	-1.46429	-0.44742	-0.63198	0.11068	-0.403391	-0.622173	0.279616	-0.848039	-0.147307	-0.379652	-0.0292335	-1.15736
DERL2	0.665575	0.223487	0.0795525	1.10244	0.888543	3.06065	-0.391105	-0.327294	-0.531242	-0.497464	-1.25823	0.191736	-0.572026	-1.62859	0.430804	0.291385	-0.253847	-0.531981	0.110665	-1.05306
RBPJ	0.963128	1.58785	-0.0649184	0.99263	0.666636	2.65768	-0.595146	-0.706732	-0.779372	-0.369296	0.482646	-1.43053	-0.908616	-0.00559769	-0.14046	-0.674261	-1.1566	0.24185	-0.689827	-0.0710603
PHF21A	0.603581	1.10822	1.48766	0.270929	1.47852	2.52036	-0.643414	-0.940046	-0.636839	0.118149	-0.245988	-0.641252	-0.111533	-0.753669	-1.11679	-0.451309	-0.778192	-0.206485	-1.28939	0.227488
APH1B	0.990872	0.956604	1.21472	0.621124	1.53337	1.90826	-0.977803	-1.39591	-0.389531	-0.32758	0.0821833	-1.36444	-0.559013	-1.50846	-0.403854	-0.0180445	-0.780259	0.505711	-0.590392	0.502431
IL6	0.353516	0.442103	0.967306	1.16774	1.56199	2.53124	-0.429724	-0.127995	-1.30244	-0.0784834	0.246823	-1.24313	-0.495586	-1.31698	-0.28826	-0.0317803	-0.31757	-0.295214	-1.33084	-0.0127148
DSE	0.865574	1.20771	1.03672	1.01177	1.4872	2.34628	-0.554702	-0.988261	-0.255086	-0.676313	0.168386	-1.51867	-0.174436	-0.768885	-0.703211	-0.195475	-0.23549	-0.823312	-0.924403	-0.3054
PLXND1	1.02574	1.18902	0.74602	1.02032	2.15945	2.01405	-0.597761	-0.535801	-0.450007	-0.866912	-0.313717	-1.48305	-0.206579	-0.879367	-0.438772	-0.196287	-0.538327	-0.536195	-0.753606	-0.35822
CSGALNACT2	0.852806	0.981718	1.18803	0.875374	1.82271	2.49245	-0.684946	-0.641095	-0.649932	-0.855466	-0.460112	-0.982069	-0.265935	-0.791162	-0.789931	-0.101444	-0.479012	-0.637692	-0.572994	-0.30129
HCAR2	0.155226	0.146577	0.596943	1.48543	1.19183	2.68632	-0.31335	-0.302939	-1.35315	-0.420949	-1.38831	-0.589837	0.20115	-0.881316	-0.283968	0.419645	-1.44213	-0.179277	-0.0349403	0.307052
CXCL3	1.32063	0.128757	1.16015	1.86247	0.460583	1.99553	-0.764026	-0.533839	-1.1802	-0.661828	-0.895059	-1.10814	0.0178128	-0.360654	0.0263795	-0.85835	-0.412471	0.95279	-1.24383	0.0932909
PDZK1IP1	0.913115	0.676481	0.615547	2.29726	0.429365	2.44517	-0.507082	-0.282118	-1.23029	-0.237766	-0.615174	-1.12578	-0.200992	-1.0206	-0.229004	-0.677777	-0.713826	0.0645757	-0.145389	-0.455722
LCN2	1.21817	1.03345	1.24839	1.83849	0.962606	2.09685	-0.76691	-0.694098	-0.85389	-0.482139	-0.615892	-0.717899	-0.0440153	-0.934961	0.0621931	-0.844376	-0.888185	-0.486134	-0.538618	-0.59303
TMC6	0.0152725	0.992751	2.17407	0.779056	0.0202494	2.43279	-1.04176	-1.01237	-0.762543	-0.0332552	0.0129534	-0.135112	-0.172797	0.128793	-0.157953	-0.753265	-0.423215	-1.10096	-1.36375	0.401049
ATG9B	0.176156	0.76473	0.808254	1.06063	1.24016	1.87177	0.433876	-0.732603	-0.137557	-1.42176	0.280935	0.210598	0.343335	-0.671506	-0.074157	-1.95687	0.148612	0.0430449	-2.02985	-0.357782
ZC3H7A	0.559552	0.958807	2.01254	0.996001	1.58836	1.342	0.0199285	-1.33309	-0.998301	-1.04487	0.378544	-0.0632285	-0.300867	-0.535981	-0.260036	-1.0746	-0.205214	0.251511	-1.31607	-0.974985
SAMD8	0.0448395	0.164407	1.08654	1.16512	1.26224	2.62724	-0.855619	-1.17665	-0.843376	-0.43653	0.715977	-0.498064	0.856977	-0.611664	-0.603115	-0.154519	-0.440741	-0.140935	-1.31604	-0.846098
PLEKHM2	0.22062	1.14635	1.3508	0.730436	1.48865	2.32934	-0.537259	-0.498392	-0.00403709	-0.290352	0.421375	0.11765	-0.304124	-1.88144	-0.687321	-0.601304	-0.694519	-0.51233	-0.940443	-0.853691
B4GALT3	0.19767	0.980871	1.54927	0.643742	1.52676	2.05065	-0.202486	-0.134068	-0.937359	0.0879914	0.710121	-0.905003	0.429673	-1.18725	-0.967038	-0.648415	-1.14316	-0.0248133	-1.19724	-0.829923
CREG2	0.703664	0.106904	-0.085328	0.539134	1.53281	2.1624	-0.171521	-0.859162	-1.72409	0.229299	-0.202151	-0.929126	0.667155	0.710021	0.532336	-0.33903	-1.29049	-0.243297	-1.78868	0.449138
RAB24	0.0955936	-0.217607	-0.0914851	0.708974	0.987795	3.04605	-0.00543506	-0.187912	-1.09314	-0.340601	0.260037	0.551013	-1.4712	0.335192	0.707555	0.116351	-0.25382	-1.43453	-1.05725	-0.65558
NQO2	-0.017424	0.612359	0.0317011	0.612055	1.39806	2.94889	-0.596066	0.251434	-0.0347539	-0.911135	-0.0283344	0.169761	-0.104153	-0.116176	-0.359811	-0.283251	-1.7144	-1.7458	-0.270525	0.157569
JARID2	0.653601	0.0735057	1.78923	-0.257804	0.239221	2.41363	-1.23142	1.2899	-1.20412	-0.174596	-0.419105	-1.71746	-0.719324	-0.0863285	0.0627761	-0.790025	-0.477824	-0.12689	0.332663	0.350369
UST	0.255143	0.766653	0.665569	-0.724791	1.55936	2.65079	-1.01863	0.183755	-0.102766	0.540096	-0.0583425	-1.80908	-0.776962	-0.532859	0.244571	-0.710338	-0.728586	-0.873872	-0.219648	0.689939
CNOT6L	0.44415	1.58653	1.83712	-0.108056	0.585056	1.86338	-0.479454	-0.15813	-0.446919	0.973751	-1.13	-1.00065	-1.7659	-0.693274	0.0166437	-0.737027	-0.323921	0.607562	-0.86221	-0.208658
SUB1	0.282828	0.388006	1.09345	-0.0893932	0.786181	3.04683	-1.04098	0.231543	-0.991959	0.267189	-1.64098	-0.551605	-0.817694	0.426105	0.522361	-0.141287	-0.58833	0.113934	-0.390506	-0.90569
VEGFB	-1.07832	2.04555	0.858797	0.0118872	1.3499	2.2415	-0.741171	-0.111508	-0.778926	-0.130961	-0.265331	-1.54701	-0.38346	-1.00695	-0.46266	0.685079	-0.440156	0.407278	-0.357689	-0.295838
MBD4	-0.415	1.70882	2.01907	-0.176241	0.72781	2.42396	-0.31353	-1.22999	-0.743848	-0.844895	-0.473042	-1.17909	-0.475939	-0.224923	-0.176259	0.121332	0.0951017	-0.286525	0.129812	-0.686629
NTNG2	-0.1639	1.22312	1.46616	0.111389	1.79849	2.52317	-1.09717	-0.947699	-0.102551	-1.07316	-0.0932106	-0.73613	-0.287425	-0.778875	-0.495954	0.329305	-0.551304	-0.642745	-0.133971	-0.34754
TFEB	-1.27678	0.740742	1.70977	-0.778146	0.60217	2.53783	-0.210598	0.833332	-0.174532	-0.192855	-0.0528477	-0.837701	1.04787	-0.868484	0.522829	-0.847126	-0.569231	-1.05642	-0.733127	-0.396691
ARHGAP45	-0.461448	1.20286	2.29989	-0.937579	0.395813	2.25121	-0.61199	0.189836	-0.0367296	0.461394	-1.18253	-0.526726	-0.147518	-0.444435	-0.313726	0.0950042	0.0819208	-1.77974	-0.23524	-0.300266
DDX39A	0.326472	0.790215	2.03518	0.851591	0.755403	1.31562	-0.795334	-0.805417	0.0793564	-1.24008	-1.34026	0.101527	0.622055	-0.147163	1.07773	0.0490698	-0.298583	-1.93282	-0.604953	-0.839611
RTN1	0.126645	1.0473	1.23886	0.444333	2.03601	1.2713	-0.917599	-0.388545	-0.624293	-0.921508	-0.571135	-1.03859	0.187253	0.11447	-0.0264163	0.812737	-0.30426	-2.41518	-0.279601	0.208217
ANKDD1A	0.100236	1.6874	1.22827	-0.00841778	1.75511	0.967962	-0.692427	-1.56863	-0.310795	-1.42097	-0.691384	-1.49023	-0.253349	0.113953	0.588659	1.20235	0.227894	-0.817731	-0.510302	-0.107604
GRAP2	0.627517	1.57466	2.08821	-0.0467479	1.55993	0.735531	0.00207388	-0.929431	-0.18441	-0.644307	-1.21243	-1.78046	0.474214	0.338498	-0.267749	0.122325	-0.0495356	-1.36523	-0.536753	-0.505914
TMEM154	0.0620274	1.16975	1.88856	0.121705	0.906315	2.56808	-0.953493	-0.989107	-0.246941	0.29482	-1.35098	-1.28884	-0.0872332	0.113003	-0.644274	-0.557903	-0.315313	-0.483932	-0.160946	-0.0453014
VCAM1	0.309764	1.24527	1.46636	0.735598	1.73895	1.80764	-0.506078	-0.811853	-0.269127	-0.691897	-1.97522	-1.49526	-0.0583396	-0.523174	-0.239528	0.141568	-0.497566	-0.277513	0.153669	-0.253273
MMP9	0.159663	1.36898	1.53953	1.47478	1.26992	2.00252	-0.764929	-0.502979	-0.603201	-0.422739	-1.8737	-1.00179	-0.339863	-0.274273	-0.418227	-0.357548	-0.449359	-0.55248	-0.174501	-0.0798083
PLEKHO1	0.409182	1.42149	1.75234	0.612478	1.22944	2.3451	-0.639724	-0.478649	-0.431701	-0.526051	-0.886876	-1.20444	0.305676	-1.11671	-0.131586	-0.292363	-0.288495	-0.864059	-0.556725	-0.658324
WIPF1	0.644438	1.41165	1.82579	0.539972	1.39308	2.12707	-0.599843	-0.499989	-0.302503	-0.410612	-1.11032	-1.40355	0.0804715	-0.820927	-0.540737	-0.239648	-0.198639	-0.892002	-0.328605	-0.675097
IKZF1	0.131135	1.54832	2.29898	0.323717	1.08682	1.92423	-0.569163	-0.295302	-0.417014	-0.00929666	-1.33727	-1.25587	-0.0777339	-0.859511	-0.406352	-0.0737527	-0.160363	-0.723845	-0.203318	-0.924417
DOCK8	0.509198	1.39353	2.28917	0.339006	0.901931	1.97261	-0.90705	0.0361393	-0.38183	-0.100106	-0.91447	-1.31257	-0.250295	-0.939852	-0.193427	0.046589	-0.0992872	-1.14971	-0.380579	-0.858993
ARHGAP9	0.274512	1.43271	1.7768	0.210318	1.28533	2.03907	-0.218376	-0.731602	-0.327118	-0.123749	-1.48261	-1.06811	0.185601	-1.57513	0.0191512	0.0832822	-0.0504332	-0.993251	-0.238599	-0.497797
BIN2	0.128468	1.28221	1.91212	0.144638	0.809949	2.66522	-0.388645	-0.446318	-0.471246	-0.563982	-1.04115	-1.12683	-0.106446	-1.11597	-0.230099	0.245898	-0.0445456	-0.229056	-0.380482	-1.04374
LAT2	-0.164284	1.42152	1.95639	0.211312	1.27582	2.38214	-0.465241	-0.431182	-0.397516	-0.381039	-1.33921	-1.02511	0.00835073	-0.44919	-0.321037	0.160471	-0.103409	-0.984502	-0.690952	-0.663322
LPXN	0.0730323	1.1748	2.02685	0.162507	1.10708	2.45212	-0.309656	-0.347762	-0.692962	-0.135294	-1.40017	-0.966575	0.106925	-0.69482	-0.514332	-0.0966416	0.156935	-0.976657	-0.208017	-0.917359
TNFAIP8L2	0.342357	0.815113	1.93117	0.620835	0.971055	2.22799	0.0334149	-1.09796	-0.733687	0.201785	-1.16493	-0.830804	-0.302365	-0.648522	0.217841	0.145554	0.252054	-1.69687	-0.553147	-0.730883
TTYH2	-0.0175706	0.931588	1.45825	0.634544	0.995066	2.62898	-0.127644	-1.04699	-0.219208	-0.231556	-1.02513	-1.52063	-0.272683	-0.947879	0.124096	0.561211	-0.184371	-1.20758	-0.571583	0.0390884
TMEM243	0.966105	1.06169	1.76057	-0.453053	1.31485	1.96913	-0.191012	-1.03357	-0.680929	-1.1051	-0.668528	-1.54701	-0.509091	-0.189207	0.414284	0.470885	-0.222146	0.0174011	-0.0898003	-1.28547
ARHGAP4	0.736411	1.50889	1.67943	-0.302755	0.632185	1.64848	-0.338734	-0.879399	-0.585147	-1.02623	-1.13709	-1.42573	0.441817	-1.31095	1.08752	0.539719	0.0799702	-0.33045	0.00134196	-1.01928
CD22	-0.270796	1.83999	2.21192	-0.511679	0.830205	1.45462	0.111737	-1.41564	-0.183821	0.696232	-0.565102	-1.4943	0.462723	-0.335379	-0.0745859	-0.34385	-0.748551	-0.975981	0.0398261	-0.727578
TSPAN32	1.00308	1.28555	1.94869	-0.101154	0.325816	1.86668	-0.108266	-0.475559	-0.157238	-0.193529	-0.433484	-2.31584	0.680635	-1.11771	0.0401376	-0.145971	-0.793511	-0.758352	-0.289491	-0.260486
LCK	0.15766	1.53129	1.82215	0.353656	0.849285	1.5208	-0.179767	-0.0178896	-0.103536	0.226759	-1.22934	-2.21666	0.232812	-1.4421	0.410672	-0.138573	-0.105057	-0.804044	-0.0630995	-0.805008
CARD11	0.25534	1.50634	2.10464	0.941587	0.36455	1.88731	-0.11434	-0.639708	-0.521149	0.362706	-0.867284	-1.68324	0.236561	-1.10751	0.0436685	-0.309156	-0.360204	-0.993954	-0.293875	-0.812284
GPX1	0.443966	1.43265	-0.177328	0.556713	1.64231	1.98074	-1.16788	0.467056	0.00644863	-0.399331	0.32456	-1.0961	0.585269	-0.614689	-0.285051	-0.296548	-0.112545	-1.10927	-0.0347746	-2.14621
GNPDA1	0.398653	1.35588	0.568303	0.697639	0.767335	1.90424	-1.06076	0.339313	-0.15242	-0.164369	-1.28918	-0.301479	-0.00772878	-0.926068	-1.16299	0.821943	1.17545	-1.69387	0.0691807	-1.33909
PLD3	0.419782	1.63654	0.325231	1.33206	1.59315	1.78722	-0.932072	0.421816	0.464001	-0.291079	-0.741224	-0.700935	-0.167877	-1.01688	-0.994411	0.169226	-0.242205	-1.62281	-0.308888	-1.13065
DGKZ	1.03788	1.35038	1.64193	0.974117	1.30766	1.80032	-1.31888	-0.55402	-0.398042	-0.114838	-0.877098	-0.0139233	-0.331556	-0.467368	0.309386	-0.589384	-0.993098	-1.26052	-0.610493	-0.892461
PTPN1	-0.221065	0.769722	1.6759	1.15214	1.57066	2.54764	-0.539745	-0.386646	-0.187606	-0.539912	-0.538066	0.0399446	-0.606147	-0.569031	-0.505066	-0.823034	-0.593058	-1.21855	-0.184063	-0.84402
HERPUD1	0.534129	1.11448	1.08268	1.27828	2.07779	1.7624	-0.886528	-0.505977	-0.560734	-1.0464	-0.623455	0.520709	-0.666917	-1.07613	-0.293414	-0.35497	-0.0774268	-1.27909	-0.203398	-0.796035
SEC11C	0.397619	0.999422	0.858427	1.05564	2.02834	2.40452	-0.939025	-0.283979	-0.576796	-0.544165	-1.30123	-0.257798	-0.24005	-1.03233	-0.176145	-0.0471554	-0.272275	-0.798194	-0.457611	-0.817211
ESYT1	0.631188	1.51341	1.12101	0.539004	1.52659	2.02688	-0.410503	-0.474973	-0.199698	-0.938487	-0.00660677	-1.09276	0.400709	-0.699606	0.253003	-1.55229	0.0917962	-1.13662	-0.545959	-1.0461
GYG1	0.621768	0.826227	0.468909	1.01854	1.47257	2.68287	-0.891664	-0.277652	-0.499152	-0.78341	-0.865783	-1.01447	0.566611	-0.822667	0.104172	-0.652931	-0.189774	-0.695081	0.26164	-1.33073
IFITM2	0.578156	0.703176	0.74776	1.19218	1.4292	2.90833	-0.527051	-0.31391	-0.341911	-0.837717	-0.969966	-0.884595	-0.00753047	-0.532526	0.0100655	-0.506026	-0.871554	-0.444008	-0.225696	-1.10637
STAT5A	0.690809	1.09481	1.44124	0.693662	1.51347	2.53282	-0.491644	-0.853319	-0.372462	-0.724421	-0.555321	-1.06448	0.130133	-0.402506	-0.404814	-0.161239	-0.613077	-0.939433	-0.431908	-1.08233
GMFG	0.528637	1.18948	1.6635	0.507854	1.22828	2.62906	-0.416962	-0.780225	-0.414725	-0.508917	-0.606589	-0.931163	-0.0945341	-0.798757	-0.176602	-0.246642	-0.376707	-0.55802	-0.402835	-1.43413
SNX18	0.283744	1.04051	1.30969	0.777001	1.72641	2.59655	-0.684989	-0.410269	-0.348154	-0.158643	-1.35812	-0.877748	-0.528742	-0.616346	-0.543024	-0.206247	-0.074877	-0.74451	-0.325827	-0.856415
BATF	0.708968	1.07101	1.66601	0.787177	1.25504	2.48767	-0.496825	-0.192022	-0.523364	-0.251649	-1.27722	-0.863086	-0.0738721	-0.860954	-0.513048	-0.794753	-0.381367	-0.766178	-0.0793339	-0.902204
MCRIP1	0.639535	1.47435	0.914379	0.868677	1.53086	2.3813	-0.616078	-0.359654	-0.15361	0.210301	-0.505228	-0.802033	0.14613	-1.08007	-1.0764	-0.586641	-0.668833	-1.00102	-0.251024	-1.06495
FXYD5	0.780694	1.5887	1.2612	0.945205	1.70605	1.90915	-0.525375	-0.511367	-0.700176	-0.0656227	-0.732062	-1.08406	-0.0569461	-0.703265	-0.110886	-0.100095	-0.428875	-1.15606	-0.934625	-1.08158
RGL1	0.150712	0.899329	1.42156	0.0699875	1.06553	2.69991	-0.341308	-0.0895228	0.459934	-0.599181	-1.95236	-0.44796	-0.0746294	-0.853765	-0.797704	-0.273021	0.271483	-1.17446	-0.310996	-0.123549
PIK3R5	0.440587	0.938296	1.60846	0.575367	0.852118	2.57744	-0.236112	-0.5611	-0.115855	-1.05046	-0.419429	-1.10392	0.293091	-0.906095	-0.503415	0.00259069	0.171937	-1.79613	-0.534586	-0.232782
MYO9B	0.472561	0.903656	1.56006	0.616706	1.24216	2.2569	-0.632305	-0.984279	0.12541	-0.691715	-0.514737	0.0310557	-0.201547	-1.29194	-0.86429	-0.0929142	0.471305	-1.68632	-0.903258	0.183478
BTBD11	0.589518	1.57922	1.6023	1.11653	0.608606	1.75181	-0.459648	0.141492	-0.31957	0.188068	-0.93675	-1.70509	-0.200243	-0.955661	-0.231374	-0.51307	-0.299566	-1.73403	-0.535606	0.313075
KIF21B	0.649709	1.08944	2.20808	0.903157	0.870338	2.03267	-1.02286	-0.131291	-0.850205	-0.541583	-0.321033	-1.05967	0.205	-0.474247	-0.298178	-0.567246	-0.279341	-1.42192	-0.839263	-0.151556
GRK3	0.745455	1.55706	2.31283	0.627966	0.74254	1.78655	-0.863397	-0.556193	-0.696092	0.030818	-0.357993	-1.33338	0.00998969	-0.83988	-0.611155	-0.370747	-0.436588	-1.22227	-0.108194	-0.417321
SLC15A3	0.536146	1.34862	1.40572	1.50561	1.05117	1.76894	-0.994966	-1.00241	0.144626	-0.327625	-0.858074	-0.830246	0.099949	-1.64657	-0.26743	0.245433	0.187267	-1.05439	-0.592698	-0.719071
LILRB4	0.0494124	1.20932	1.57289	1.31591	1.13855	1.69642	-0.511727	0.232246	0.311208	-0.454887	-0.895748	-0.515716	-0.509486	-1.8704	-0.962621	-0.0188755	0.313225	-1.43972	-0.773726	0.113727
SPEG	1.15703	1.77317	0.526263	0.381785	2.11174	0.0735872	-0.370708	-1.53914	0.405227	0.263547	0.0330841	-0.766682	0.0375579	0.491264	-0.672882	-1.15855	-1.20301	-0.163779	-1.6482	0.268691
CCBE1	0.15917	1.29678	0.52665	0.390743	1.78705	1.46252	0.322777	-1.82266	0.778603	0.418778	0.0450154	-0.527934	0.410778	0.142132	-1.6218	-1.35252	-1.1815	-0.403582	-0.91011	0.0791157
GPR146	1.41982	1.70114	-0.0916428	-0.867317	1.18734	1.51953	0.252161	-1.26985	0.750621	-0.388932	0.693426	0.175901	0.0650736	-1.37151	0.310673	-1.44591	-0.382196	-1.44221	-0.604012	-0.212103
TPPP3	0.733475	1.35338	-0.699398	0.142038	1.64653	1.73652	-0.983684	-0.297675	0.647866	-0.050926	1.24174	-0.435676	0.482793	-0.422191	-0.831326	-1.87489	-1.16086	-0.477068	-0.970995	0.220349
SMARCD3	0.399885	1.81699	-0.323266	0.187894	2.43563	1.21859	0.506952	-1.42922	-0.630373	-0.993369	-0.626177	-1.19975	-0.319436	-0.9471	-0.436981	0.812395	0.453025	-0.287334	-0.568897	-0.0694633
C17orf49	1.15662	1.29279	0.568073	0.00487197	1.65052	1.87534	0.226769	-0.494678	-2.09335	-0.746424	-0.419459	-0.510215	-0.491954	-1.75925	0.183927	0.311015	-0.0994649	-0.446945	-0.272291	0.0641081
ARMC5	0.0771999	1.90479	0.348688	-0.617974	1.93161	1.37115	0.697818	-0.456147	-0.435595	-0.684993	0.768084	-1.4526	-0.431317	-0.789366	0.73534	0.0205918	-1.6651	-0.787854	0.127106	-0.661434
NAT9	0.49251	0.472565	-0.239963	0.602465	1.93629	2.10439	-0.839741	-1.13027	-0.57309	-0.0625463	1.00212	-2.00368	-0.538673	-1.29389	0.644755	0.0512299	-0.118722	0.094929	-0.388817	-0.211864
ISYNA1	-0.0586643	1.93171	0.272533	0.487291	2.07727	0.95453	-1.02463	-0.727178	-0.743068	-0.0916597	0.438225	-2.18522	0.0288802	-0.686652	0.898653	0.28925	-0.934313	-0.523766	-0.0820203	-0.321164
RASGRF1	0.381272	0.737448	1.70078	1.07891	1.20953	1.32728	0.369571	-2.08252	-0.329364	0.373823	-0.0441023	-0.975384	-0.364979	-0.827816	-0.02879	0.693208	-1.63549	-0.505138	-0.0179061	-1.06033
RUNX2	1.02254	0.61041	0.802267	1.21065	1.10066	2.15023	-0.904371	-1.4597	-1.13974	-0.672163	0.0449609	-1.23675	-0.0812306	-0.71024	-0.32165	1.12606	0.316487	-0.967621	-0.658562	-0.232232
WDR91	0.222815	1.86882	1.10752	0.500801	1.48156	1.04661	-0.81749	-1.71506	-1.35837	-0.368464	0.685951	-1.30896	0.0883293	-0.376731	-0.624691	1.05658	0.211074	-0.895158	-0.613732	-0.191391
SASH1	1.66626	1.27893	0.519535	1.25634	1.93042	1.07159	-1.16946	-0.624777	-0.0744016	-0.688331	-0.554846	-1.67609	-1.08309	-0.760389	-0.255163	-0.114295	-0.201269	0.275773	-0.749725	-0.047018
RCN1	1.46617	1.20232	-0.281244	1.54052	2.17361	1.37197	-1.31751	-0.111839	-0.542999	-0.401523	-0.0201283	-1.12333	-0.473521	-0.936284	-0.280931	-0.517317	-0.848426	0.144599	-0.252182	-0.791955
EXTL3	1.69887	0.891375	0.136235	1.25193	2.07381	1.91324	-1.05365	-0.381948	-0.439735	-0.214775	-0.659566	-0.242176	-0.85649	-0.59249	-1.01672	-0.842763	-0.531847	-0.325748	-0.74973	-0.0578169
TTYH3	1.33858	0.560509	0.621314	1.69008	1.64513	2.10288	-1.26746	-0.445232	-0.570588	-0.253435	-0.500801	-1.06212	-0.452327	-1.34778	-0.574535	-0.100437	-0.300397	-0.495585	-0.493694	-0.0941004
COL4A1	1.26803	0.892169	0.498296	1.59898	1.73246	2.23852	-0.789904	-0.630636	-0.549204	-1.23865	-0.470817	-0.898701	-0.23798	-0.57888	-0.693236	-0.396307	-0.54824	-0.619703	-0.365151	-0.211041
CHSY1	1.04691	0.945248	0.562768	1.16514	1.9149	2.46666	-0.745078	-0.646534	-0.891764	-0.472014	-0.81914	-1.09915	-0.304906	-0.543271	-0.538729	-0.592245	-0.696965	-0.291527	-0.296622	-0.16369
NT5DC2	1.52683	1.01995	0.966504	1.37206	1.93251	1.39764	-1.25266	-0.640913	-0.48195	-1.1588	-0.676067	-0.451033	0.109558	-0.799533	0.185382	-0.852749	-0.0911161	-0.647962	-0.679084	-0.77857
FUT8	1.54894	1.24764	1.07013	1.24968	1.67865	1.58144	-0.436525	-0.611338	-1.27123	-1.09246	-1.00221	-0.605939	-0.290805	-0.619467	-0.694934	-0.431282	-0.463044	0.3309	-0.363759	-0.824401
TULP3	1.74408	1.78132	0.0605632	1.38043	1.27927	1.32936	-0.208261	-1.21539	-1.20606	-1.02185	-0.032331	-1.20081	-0.0785556	0.0182769	0.102943	-0.136132	-0.539557	-0.57067	-0.388072	-1.09855
COL3A1	1.83992	1.37694	0.156673	0.624965	2.02314	1.77043	-0.564219	-0.821529	-0.462935	-1.52218	-0.543745	-0.748008	-0.0893477	-0.568712	-0.759896	-0.260807	-0.472588	-0.45476	0.0143326	-0.537669
COL1A1	1.844	1.54912	0.421629	0.716685	2.1442	1.47333	-0.698885	-0.718443	-0.457088	-1.31424	-0.69871	-0.696596	-0.324322	-0.588673	-0.622764	-0.380506	-0.599652	-0.494502	-0.0726561	-0.481931
COL6A3	1.32661	1.46809	0.549674	1.18532	1.99607	1.85392	-0.835448	-0.854406	-0.38338	-1.3037	-0.35858	-0.54293	-0.361348	-0.521574	-0.500384	-0.455621	-0.678416	-0.784017	-0.360969	-0.43891
COL5A2	1.55911	1.37426	0.341061	1.04876	2.00623	1.84235	-0.593823	-0.818832	-0.557469	-1.19353	-0.23121	-1.15258	-0.493139	-0.658754	-0.717743	-0.266367	-0.504942	-0.50232	-0.33697	-0.144091
SPARC	1.68954	1.49124	0.299575	0.886026	2.07283	1.73856	-0.750347	-0.689425	-0.382327	-1.08878	-0.507902	-1.10842	-0.500551	-0.714486	-0.477248	-0.391412	-0.492526	-0.349994	-0.136638	-0.587715
P3H1	1.55369	1.44837	0.3143	0.941205	1.9744	1.88819	-0.931718	-0.962247	-0.309415	-0.650192	-0.571109	-1.13738	-0.191752	-0.584603	-0.254943	-0.378933	-0.974429	-0.175529	-0.353222	-0.644675
PDE10A	0.978654	1.27882	0.313859	0.815309	2.48462	1.9812	-0.760258	-0.810906	-0.614143	-1.0114	-0.751173	-0.836933	-0.415847	-0.196081	-0.21329	-0.173175	-0.502356	-0.121185	-0.571585	-0.874132
LHFPL6	1.34896	1.52271	0.553206	0.997698	2.00673	1.76141	-0.297039	-0.961592	-0.554826	-1.06216	-0.726921	-1.2106	-0.674392	-0.306178	-0.401539	0.0446511	-0.524862	-0.196989	-0.443736	-0.87455
RAPGEF3	1.45816	1.20752	0.0443944	0.944034	2.20575	1.73064	-0.685539	-0.730329	-0.685688	-1.14159	-0.134756	-1.30632	-0.213978	-0.918031	-0.238939	0.069963	-0.740119	-0.0124215	-0.812781	-0.039961
CSPG4	1.51637	1.28911	-0.0764439	1.05376	2.08425	1.82108	-0.731626	-1.38974	-0.110904	-1.18587	-0.0293062	-0.907116	-0.320737	-0.364418	-0.607017	-0.342989	-0.535934	-0.257216	-0.637419	-0.26783
FADS2	1.36251	1.66347	0.812601	1.28597	1.3436	1.25665	-1.34693	-1.48087	-0.329691	-1.05	0.440747	-0.925188	-0.467963	-0.448147	-0.551323	-0.605915	0.0219008	-1.00513	0.403886	-0.380179
ANGPT2	1.29413	0.909248	0.55123	1.44692	1.81993	1.93581	-0.604126	-1.45097	-0.446701	-0.545631	0.329622	-0.571308	-0.325336	-0.740239	-0.539929	-0.174285	-0.947224	-0.700878	-1.12296	-0.117309
ITGA1	1.30922	1.1661	0.19351	1.95947	1.72433	1.63318	-0.513564	-1.317	-0.0415802	-0.727992	-0.222806	-1.28556	-0.641312	-0.302663	-0.835852	-0.157233	-0.421205	-0.509136	-0.546905	-0.462996
FADS1	1.34203	1.41683	0.808296	1.53171	1.55619	1.70007	-0.783163	-1.50765	-0.496499	-1.36076	-0.418123	-0.573672	-0.486669	-0.224255	-0.337531	-0.389463	-0.4728	-0.528957	-0.255995	-0.519611
CRTC3	0.700674	1.51659	1.26065	1.63735	2.07334	1.13452	-0.756522	-0.814045	-0.866475	-0.404803	-0.287458	-0.67444	-1.40917	-0.673622	-0.635146	-0.349938	-0.628455	-0.0521523	-0.438277	-0.332628
ZNF275	1.61483	1.46911	1.46979	0.713923	1.7701	0.701442	-1.252	-1.53509	-0.953464	-0.650928	-0.117124	-0.816955	-1.08721	-0.717782	-0.37592	-0.190667	-0.0479344	0.236628	-0.258598	0.0278428
CHD3	0.888279	1.79762	1.27098	1.02868	2.15217	0.715262	-0.545289	-0.931526	-0.512903	-1.03417	-0.185605	-1.41201	0.166489	-0.370351	-0.123164	-0.928594	-0.851115	-0.349081	-0.860695	0.0850119
ARHGAP10	1.49772	1.65491	1.01205	0.55209	2.16196	1.26468	-0.617063	-0.969404	0.0647652	-0.263739	-0.0685516	-1.06634	-0.512391	-0.916407	-0.672443	-0.862064	-0.978449	-0.41563	-0.23657	-0.62912
SLC39A13	1.04898	1.72238	0.535008	0.534401	2.12396	1.86916	-0.546067	-0.909471	-0.887473	-0.767126	0.338674	-0.79154	-0.770279	-0.74663	-0.445674	-0.249864	-1.1168	-0.125736	-0.638015	-0.177886
KLF7	1.57066	1.45525	1.08864	0.860542	1.502	1.74273	-0.550655	-0.943889	-0.72766	-0.998151	0.371234	-1.0529	-0.157248	-1.08987	-0.675211	-0.301198	-0.472915	-0.0501932	-0.858012	-0.71315
DNAJB5	1.22101	1.48498	0.93272	0.851461	2.29212	1.54614	-0.627384	-1.02572	-0.755897	-0.724221	-0.0675527	-0.828804	-0.315871	-0.824257	-0.924999	-0.325344	-0.217192	-0.694286	-0.318415	-0.678489
B3GALNT1	0.422189	1.2797	0.863795	0.490309	1.95175	1.80109	-0.306136	-1.31444	0.235348	0.364607	-1.46591	-1.783	-0.596527	-0.671498	-0.239459	-0.458761	0.217661	0.272428	-0.681956	-0.381197
ERO1B	0.642199	1.31307	1.13659	0.716646	1.6046	1.59942	-0.271347	-1.91595	-0.599532	-0.595844	0.0307626	-2.0261	-0.667006	-0.570122	-0.591888	0.0695767	0.0586664	-0.0721453	-0.260009	0.398404
CEP170	1.12789	1.29428	1.70402	0.771974	1.52849	1.36132	-0.207343	-1.82207	-0.14735	-0.293567	-0.590343	-1.49754	-0.621537	-0.0261793	-0.846642	-0.324087	-0.142695	-0.981184	-0.328726	0.0412845
GPR155	0.988049	1.14791	1.03067	0.5053	1.84994	1.68499	-0.842114	-1.06865	-0.714707	-0.672537	-0.60611	-1.97149	0.0285951	-0.911852	-0.0882816	0.37541	0.566238	-0.654107	-0.568179	-0.079074
NLGN2	1.10952	1.52366	0.775787	0.644541	2.07302	1.32487	-0.197964	-0.781869	-0.363401	-0.926024	-0.762244	-2.23276	0.113673	-0.40307	-0.256853	0.0400286	-0.683422	-0.469137	-0.489392	-0.0389663
MTHFD1L	0.985566	0.901084	1.50446	1.43106	1.46636	1.80943	-0.608669	-0.846443	-0.0348535	-0.79716	-0.849825	-1.39865	-1.33259	-0.382348	0.0121815	0.041919	-0.505001	-0.39618	-0.151697	-0.848641
TRPS1	0.935474	1.19205	1.61584	0.600374	1.54893	2.15784	-0.72331	-0.872117	-0.0063901	-0.65513	-0.813614	-1.05212	-0.686272	-1.34615	-0.270854	-0.0230897	-0.106966	-0.387229	-0.375129	-0.732134
UBE2E2	0.400848	1.28607	1.13195	0.706986	1.78441	1.88502	0.151874	0.272159	-0.792636	-1.25505	-1.09117	-1.80342	-0.453275	-0.895631	-0.0588826	-0.179786	0.277932	-0.345981	-0.226749	-0.794664
TENM4	0.36283	1.56958	1.3701	1.11496	2.00447	1.53585	-0.568995	-0.135771	-0.22604	-1.24061	-1.38489	-0.70768	-0.36552	-0.219157	-0.586996	-1.05248	0.116524	-0.734054	-0.366003	-0.486113
LRRC8C	1.07068	1.1566	1.2677	1.01347	1.64196	2.09167	-0.642436	-0.514678	-0.105752	-1.1462	-1.25504	-0.996782	-0.27882	-0.814205	-0.466748	-0.0897284	-0.294418	-0.984722	-0.368171	-0.284374
ZNF469	0.997458	1.12964	0.641989	0.646867	2.27492	2.07434	-0.281729	-0.61432	-0.36723	-0.631422	-1.16887	-1.12685	-0.226173	-0.481962	-0.290633	-0.356893	-0.250979	-1.43408	-0.401973	-0.132097
LIMS2	0.681324	1.87284	0.422507	-0.229317	2.63646	1.43469	-0.33612	-1.06785	-0.159322	-0.742328	-0.23231	-1.5257	-0.0902065	-0.608219	-0.677294	-0.329045	-0.668503	0.140228	-0.380681	-0.141148
NTN1	0.67394	1.46511	-0.265736	0.226682	2.42426	2.06917	-0.18453	-0.736841	0.548809	-0.449688	-0.504361	-1.37203	-0.58634	-0.55485	-1.2842	-0.154405	-0.573104	-0.366903	-0.33485	-0.040128
HLX	0.786759	1.44576	0.849438	0.653258	1.33904	2.15705	-0.575288	-1.04207	0.164879	-1.04754	-1.04036	-1.24541	0.732559	-0.662082	-1.37954	-0.0786622	-0.571467	0.0226333	0.0462601	-0.555219
CLEC1A	1.18794	1.0497	0.67293	0.747443	1.61086	2.04485	-0.24782	-0.148948	0.254043	-1.60282	-0.597023	-1.67047	-0.5453	-0.459174	-0.826441	-0.116722	-0.40039	0.56213	-0.815098	-0.699679
ARHGAP24	0.699739	1.07129	0.748329	0.791701	2.22678	1.87405	-0.371029	-0.727489	-0.525066	-0.605241	0.0881807	-1.75251	-0.335662	-0.154858	-0.892699	-0.908221	-0.768797	0.342013	0.114775	-0.915276
PDLIM4	0.666895	1.32979	0.396827	0.522546	2.07887	2.34524	-0.346584	-0.0991572	-0.181563	-0.74107	-0.100674	-1.22409	-0.295459	-0.671764	-0.712238	-0.67018	-1.1879	0.145357	-0.0800065	-1.17485
