# Supplementary material for: PGLYRP-1 mediated intracellular peptidoglycan detection promotes mucosal protection
Source: Research Square preprint supplement (doi:10.21203/rs.3.rs-5118704/v1), 2024-10-14
Supplement: Supplementary file 3 [file 1494b9d6161333e40d4bc87f.xlsx]

## Sheet: Sheet1
GeneID	GeneSymbol	logFC	AveExpr	t	P.Value	adj.P.Val	B	Contrast
ENSMUSG00000023951.18	Vegfa	4.30003	3.65091	62.2111	7.65290572223147e-17	1.70759285380151e-12	26.3234	PG1_GMTP-WT_GMTP
ENSMUSG00000069045.11	Ddx3y	7.86508	3.47249	52.5001	6.22101806602045e-16	6.94047880535572e-12	24.9571	PG1_GMTP-WT_GMTP
ENSMUSG00000075602.10	Ly6a	3.104	4.07878	40.3711	1.58395698501604e-14	7.03968542706793e-11	23.0658	PG1_GMTP-WT_GMTP
ENSMUSG00000086503.4	Xist	-8.06587	1.33992	-40.0526	1.74605469499162e-14	7.03968542706793e-11	20.6091	PG1_GMTP-WT_GMTP
ENSMUSG00000036526.8	Card11	2.78229	5.68205	40.0429	1.75128155604987e-14	7.03968542706793e-11	23.3169	PG1_GMTP-WT_GMTP
ENSMUSG00000070323.11	Mmp27	2.25398	4.31455	39.7904	1.892982232887e-14	7.03968542706793e-11	23.0051	PG1_GMTP-WT_GMTP
ENSMUSG00000081723.1	Gm15931	2.55017	4.11661	38.0309	3.30126936460698e-14	1.05230319046394e-10	22.4937	PG1_GMTP-WT_GMTP
ENSMUSG00000015854.7	Cd5l	1.87781	7.60434	36.3965	5.66368022778317e-14	1.57967121153157e-10	22.3942	PG1_GMTP-WT_GMTP
ENSMUSG00000002985.16	Apoe	-2.87672	11.8431	-34.6242	1.04539488540391e-13	2.59176623089082e-10	21.855	PG1_GMTP-WT_GMTP
ENSMUSG00000040026.8	Saa3	-2.60358	5.4037	-34.2663	1.18755112574895e-13	2.64978282688364e-10	21.6251	PG1_GMTP-WT_GMTP
ENSMUSG00000024665.8	Fads2	-2.53725	3.08795	-33.7931	1.40849048362407e-13	2.70366577467696e-10	20.8864	PG1_GMTP-WT_GMTP
ENSMUSG00000068457.14	Uty	8.61331	2.34766	33.7055	1.45403976588193e-13	2.70366577467696e-10	20.3718	PG1_GMTP-WT_GMTP
ENSMUSG00000069049.11	Eif2s3y	8.34312	3.08128	33.0881	1.82406045481708e-13	3.1307893021795e-10	20.6793	PG1_GMTP-WT_GMTP
ENSMUSG00000035493.10	Tgfbi	-2.05542	8.67405	-32.1214	2.62348908184731e-13	4.18127942023279e-10	21	PG1_GMTP-WT_GMTP
ENSMUSG00000034926.3	Dhcr24	-1.96438	4.84725	-31.8358	2.92692909979045e-13	4.34026800086195e-10	20.7635	PG1_GMTP-WT_GMTP
ENSMUSG00000076431.4	Sox4	1.72502	4.40945	31.6766	3.1122792996814e-13	4.34026800086195e-10	20.6509	PG1_GMTP-WT_GMTP
ENSMUSG00000016283.13	H2-M2	-2.29579	5.87325	-30.926	4.17460879609993e-13	5.47929682749281e-10	20.5073	PG1_GMTP-WT_GMTP
ENSMUSG00000086763.1	Plxna4os1	2.9062	1.53378	29.3356	7.96452438694881e-13	9.87291292477715e-10	18.5303	PG1_GMTP-WT_GMTP
ENSMUSG00000056673.14	Kdm5d	8.37308	2.15378	28.5107	1.12861003252675e-12	1.27181121399408e-09	18.7211	PG1_GMTP-WT_GMTP
ENSMUSG00000049130.6	C5ar1	-1.34334	7.71349	-28.4874	1.1399733016574e-12	1.27181121399408e-09	19.5951	PG1_GMTP-WT_GMTP
ENSMUSG00000047250.13	Ptgs1	1.80304	4.48111	27.0878	2.10853685154712e-12	2.24037060802719e-09	18.9127	PG1_GMTP-WT_GMTP
ENSMUSG00000005800.3	Mmp8	1.40333	6.28892	26.6985	2.51573786871299e-12	2.45438068821652e-09	18.815	PG1_GMTP-WT_GMTP
ENSMUSG00000025203.6	Scd2	-1.94054	6.36167	-26.6862	2.52994916994487e-12	2.45438068821652e-09	18.8106	PG1_GMTP-WT_GMTP
ENSMUSG00000027750.16	Postn	-3.06312	2.18653	-26.2437	3.10194422138549e-12	2.88390339215727e-09	17.9443	PG1_GMTP-WT_GMTP
ENSMUSG00000059824.12	Dbp	2.67365	3.82146	25.9528	3.55317229571455e-12	3.17127733737115e-09	18.3513	PG1_GMTP-WT_GMTP
ENSMUSG00000002885.14	Adgre5	1.40961	6.57552	25.6018	4.19396765739265e-12	3.5992307822847e-09	18.3219	PG1_GMTP-WT_GMTP
ENSMUSG00000022351.14	Sqle	-1.76687	4.80434	-25.0226	5.54096935688393e-12	4.57909812074634e-09	18.017	PG1_GMTP-WT_GMTP
ENSMUSG00000032193.9	Ldlr	-1.48823	6.59665	-24.3057	7.89069206949823e-12	6.11844180038473e-09	17.7021	PG1_GMTP-WT_GMTP
ENSMUSG00000000318.16	Clec10a	2.43534	1.81067	24.2278	8.20463155397369e-12	6.11844180038473e-09	16.9684	PG1_GMTP-WT_GMTP
ENSMUSG00000000957.11	Mmp14	-1.81114	6.32816	-24.1172	8.6732678137091e-12	6.11844180038473e-09	17.6076	PG1_GMTP-WT_GMTP
ENSMUSG00000025993.10	Slc40a1	1.59053	6.62365	24.0609	8.92342198454691e-12	6.11844180038473e-09	17.5809	PG1_GMTP-WT_GMTP
ENSMUSG00000001467.5	Cyp51	-1.6776	5.33076	-24.0545	8.95210129424272e-12	6.11844180038473e-09	17.5665	PG1_GMTP-WT_GMTP
ENSMUSG00000043740.15	B430306N03Rik	1.15499	5.65688	24.0266	9.07933339361392e-12	6.11844180038473e-09	17.5572	PG1_GMTP-WT_GMTP
ENSMUSG00000038068.15	Rnf144b	1.31458	6.91632	23.9742	9.32313096459824e-12	6.11844180038473e-09	17.5386	PG1_GMTP-WT_GMTP
ENSMUSG00000079227.10	Ccr5	1.26239	8.00707	23.8753	9.80322466050524e-12	6.24969576713867e-09	17.4904	PG1_GMTP-WT_GMTP
ENSMUSG00000021990.16	Spata13	-1.21162	4.79956	-23.5865	1.13644135192583e-11	7.04372663486695e-09	17.3227	PG1_GMTP-WT_GMTP
ENSMUSG00000029661.16	Col1a2	-1.73497	4.26614	-23.0836	1.47614730414561e-11	8.84014334382288e-09	17.0488	PG1_GMTP-WT_GMTP
ENSMUSG00000074361.11	C5ar2	-2.67919	2.74676	-23.0461	1.50551448512199e-11	8.84014334382288e-09	16.8146	PG1_GMTP-WT_GMTP
ENSMUSG00000026012.2	Cd28	1.35966	6.80968	22.9442	1.58859080523631e-11	9.08877606083021e-09	17.0095	PG1_GMTP-WT_GMTP
ENSMUSG00000058258.14	Idi1	-1.76945	3.3571	-22.5759	1.93292536702612e-11	1.07823409286134e-08	16.7095	PG1_GMTP-WT_GMTP
ENSMUSG00000001281.10	Itgb7	1.70692	5.67436	22.3576	2.17431275923395e-11	1.18330342918993e-08	16.6961	PG1_GMTP-WT_GMTP
ENSMUSG00000001348.15	Acp5	1.38523	5.92145	22.2938	2.25088407956218e-11	1.192854679038e-08	16.6622	PG1_GMTP-WT_GMTP
ENSMUSG00000025154.15	Arhgap19	1.10409	7.81703	22.2551	2.29878327426317e-11	1.192854679038e-08	16.6392	PG1_GMTP-WT_GMTP
ENSMUSG00000006818.5	Sod2	-1.56032	6.5018	-22.1882	2.3840699759429e-11	1.20899439484577e-08	16.6048	PG1_GMTP-WT_GMTP
ENSMUSG00000074417.9	Gm14548	2.15191	4.14129	21.8888	2.81023880361356e-11	1.39344129833398e-08	16.4201	PG1_GMTP-WT_GMTP
ENSMUSG00000045294.11	Insig1	-1.11791	5.91427	-21.6307	3.2437521900921e-11	1.57343136125054e-08	16.2981	PG1_GMTP-WT_GMTP
ENSMUSG00000070427.4	Il18bp	1.51691	5.72548	21.4175	3.65640486506195e-11	1.73585876072611e-08	16.1788	PG1_GMTP-WT_GMTP
ENSMUSG00000030427.17	Lilra6	2.53092	3.0015	21.2438	4.03450679155259e-11	1.84438775570776e-08	15.968	PG1_GMTP-WT_GMTP
ENSMUSG00000031604.10	Msmo1	-1.31455	5.96556	-21.2369	4.05032940571327e-11	1.84438775570776e-08	16.0759	PG1_GMTP-WT_GMTP
ENSMUSG00000031722.10	Hp	-1.98074	3.10504	-21.1344	4.29422453389616e-11	1.91347845113558e-08	15.9254	PG1_GMTP-WT_GMTP
ENSMUSG00000020473.13	Aebp1	-2.22005	2.34419	-21.0914	4.40128360120663e-11	1.91347845113558e-08	15.7464	PG1_GMTP-WT_GMTP
ENSMUSG00000035459.18	Stab2	2.36993	3.19921	21.0429	4.52519223918186e-11	1.91347845113558e-08	15.8887	PG1_GMTP-WT_GMTP
ENSMUSG00000021250.13	Fos	-1.2428	5.6056	-21.0353	4.54507945637906e-11	1.91347845113558e-08	15.9616	PG1_GMTP-WT_GMTP
ENSMUSG00000032725.10	Folr2	1.14626	6.08466	20.9482	4.77855053764771e-11	1.97451478049136e-08	15.9096	PG1_GMTP-WT_GMTP
ENSMUSG00000000693.10	Loxl3	1.46683	4.6974	20.8441	5.07472141439152e-11	2.04725983479226e-08	15.8518	PG1_GMTP-WT_GMTP
ENSMUSG00000027322.11	Siglec1	2.38033	8.25846	20.8227	5.13810562220977e-11	2.04725983479226e-08	15.8272	PG1_GMTP-WT_GMTP
ENSMUSG00000030577.14	Cd22	1.05885	5.54945	20.7582	5.33421585274299e-11	2.08811154951324e-08	15.8016	PG1_GMTP-WT_GMTP
ENSMUSG00000102418.1	Sh2d1b1	1.28123	3.94195	20.5134	6.15490994369482e-11	2.36783630299418e-08	15.6487	PG1_GMTP-WT_GMTP
ENSMUSG00000018819.10	Lsp1	1.3021	5.27041	20.4123	6.53251414045379e-11	2.4705082714567e-08	15.5999	PG1_GMTP-WT_GMTP
ENSMUSG00000051439.7	Cd14	-1.38393	7.96153	-20.1143	7.79964990976004e-11	2.9005598072746e-08	15.4049	PG1_GMTP-WT_GMTP
ENSMUSG00000033857.12	Engase	1.34845	5.58078	20.0013	8.34736843450738e-11	3.05335789965841e-08	15.3518	PG1_GMTP-WT_GMTP
ENSMUSG00000059089.4	Fcgr4	1.188	7.33294	19.8759	9.00412405851517e-11	3.23785187721699e-08	15.2623	PG1_GMTP-WT_GMTP
ENSMUSG00000018796.13	Acsl1	-1.69672	6.53424	-19.8508	9.14196514429572e-11	3.23785187721699e-08	15.2523	PG1_GMTP-WT_GMTP
ENSMUSG00000022106.14	Rcbtb2	1.1618	7.03943	19.747	9.73782325123971e-11	3.39500078445175e-08	15.1846	PG1_GMTP-WT_GMTP
ENSMUSG00000039942.15	Ptger4	-1.08381	5.25954	-19.7021	1.00079096551937e-10	3.43548443286673e-08	15.1719	PG1_GMTP-WT_GMTP
ENSMUSG00000007872.3	Id3	2.33037	2.55045	19.6628	1.02514616189664e-10	3.46577065309087e-08	15.0237	PG1_GMTP-WT_GMTP
ENSMUSG00000025591.6	Tma16	-2.2569	3.46769	-19.6218	1.05119920151993e-10	3.5008071318678e-08	15.1063	PG1_GMTP-WT_GMTP
ENSMUSG00000081665.2	Gm15922	1.23764	4.23027	19.2103	1.35633816475604e-10	4.45058433385317e-08	14.8741	PG1_GMTP-WT_GMTP
ENSMUSG00000018927.3	Ccl6	1.04726	8.49202	18.7885	1.77063451377929e-10	5.72582143564599e-08	14.5662	PG1_GMTP-WT_GMTP
ENSMUSG00000027398.13	Il1b	-4.98196	0.441744	-18.5789	2.02574167619205e-10	6.45719628869617e-08	13.6926	PG1_GMTP-WT_GMTP
ENSMUSG00000050578.10	Mmp13	1.19751	4.67857	18.2178	2.56278440688611e-10	7.97684150143777e-08	14.232	PG1_GMTP-WT_GMTP
ENSMUSG00000101389.1	Ms4a4a	1.4146	6.48013	18.2112	2.57398193028064e-10	7.97684150143777e-08	14.1994	PG1_GMTP-WT_GMTP
ENSMUSG00000020654.15	Adcy3	1.61185	4.56036	18.1513	2.67749216596742e-10	8.18395653414124e-08	14.1899	PG1_GMTP-WT_GMTP
ENSMUSG00000055782.9	Abcd2	1.242	5.54887	18.1288	2.71769004814187e-10	8.19457000597155e-08	14.1572	PG1_GMTP-WT_GMTP
ENSMUSG00000053113.3	Socs3	-4.35599	1.11028	-18.0823	2.80246345217778e-10	8.33751560112572e-08	13.7347	PG1_GMTP-WT_GMTP
ENSMUSG00000042029.7	Ncapg2	1.0924	6.41997	17.9156	3.13098327887336e-10	9.19231972388176e-08	13.9999	PG1_GMTP-WT_GMTP
ENSMUSG00000052336.7	Cx3cr1	-2.69191	3.42978	-17.8758	3.21536059571142e-10	9.31606689189393e-08	14.0122	PG1_GMTP-WT_GMTP
ENSMUSG00000001506.10	Col1a1	-1.99471	3.95385	-17.8567	3.25663612050252e-10	9.31606689189393e-08	14.0021	PG1_GMTP-WT_GMTP
ENSMUSG00000022504.10	Ciita	1.08755	7.08642	17.7687	3.45489912425314e-10	9.75812204550129e-08	13.8911	PG1_GMTP-WT_GMTP
ENSMUSG00000093930.2	Hmgcs1	-1.12903	5.8314	-17.7226	3.56377219215681e-10	9.93980611544936e-08	13.8761	PG1_GMTP-WT_GMTP
ENSMUSG00000021670.14	Hmgcr	-1.03638	5.73667	-17.6303	3.79326853596743e-10	1.04492840546964e-07	13.814	PG1_GMTP-WT_GMTP
ENSMUSG00000039934.12	Gsap	-1.01739	5.5058	-17.4133	4.39793563162726e-10	1.1936566142676e-07	13.6672	PG1_GMTP-WT_GMTP
ENSMUSG00000066152.11	Slc31a2	-0.918879	7.03457	-17.3958	4.45114974595414e-10	1.1936566142676e-07	13.6314	PG1_GMTP-WT_GMTP
ENSMUSG00000099876.1	Gm29650	7.1091	-3.40014	17.3716	4.52551343341014e-10	1.1936566142676e-07	9.15975	PG1_GMTP-WT_GMTP
ENSMUSG00000022816.11	Fstl1	-1.34692	2.9519	-17.3647	4.54716139527388e-10	1.1936566142676e-07	13.6548	PG1_GMTP-WT_GMTP
ENSMUSG00000049103.14	Ccr2	1.68583	3.61951	17.3129	4.71214252838027e-10	1.22258181669475e-07	13.6357	PG1_GMTP-WT_GMTP
ENSMUSG00000020034.7	Tcp11l2	1.02827	5.56398	17.263	4.87729131065367e-10	1.24997600037928e-07	13.5603	PG1_GMTP-WT_GMTP
ENSMUSG00000026837.16	Col5a1	-2.167	1.73373	-17.2475	4.92976686386308e-10	1.24997600037928e-07	13.4176	PG1_GMTP-WT_GMTP
ENSMUSG00000031443.7	F7	1.17662	5.56052	17.161	5.23457071562252e-10	1.3019846250453e-07	13.4881	PG1_GMTP-WT_GMTP
ENSMUSG00000032254.10	Kif23	1.26518	4.18924	17.1563	5.25158500668116e-10	1.3019846250453e-07	13.5184	PG1_GMTP-WT_GMTP
ENSMUSG00000026271.15	Gpr35	2.10937	1.51118	17.0726	5.56680146063766e-10	1.36496748341987e-07	13.2561	PG1_GMTP-WT_GMTP
ENSMUSG00000021273.11	Fdft1	-1.44734	3.8996	-16.998	5.86534751853735e-10	1.42253803457743e-07	13.4136	PG1_GMTP-WT_GMTP
ENSMUSG00000039031.16	Arhgap18	0.89178	6.76568	16.9469	6.07941831085885e-10	1.45860280398058e-07	13.3141	PG1_GMTP-WT_GMTP
ENSMUSG00000074063.10	Osgin1	1.34984	3.85469	16.8019	6.73453063329271e-10	1.58992632431442e-07	13.2757	PG1_GMTP-WT_GMTP
ENSMUSG00000022895.16	Ets2	-1.18859	4.16028	-16.7946	6.76928251736074e-10	1.58992632431442e-07	13.2628	PG1_GMTP-WT_GMTP
ENSMUSG00000005237.14	Dnah2	2.919	0.514259	16.7767	6.85576076213863e-10	1.59346447797499e-07	12.744	PG1_GMTP-WT_GMTP
ENSMUSG00000032470.17	Mras	1.09641	3.80969	16.4498	8.66405167615242e-10	1.98875489954215e-07	13.0235	PG1_GMTP-WT_GMTP
ENSMUSG00000020661.15	Dnmt3a	0.845188	9.39409	16.4386	8.73472774414604e-10	1.98875489954215e-07	12.919	PG1_GMTP-WT_GMTP
ENSMUSG00000044674.6	Fzd1	-1.40982	2.64645	-16.3754	9.14325681481162e-10	2.06074231625143e-07	12.959	PG1_GMTP-WT_GMTP
ENSMUSG00000064373.12	Selenop	0.87466	10.5915	16.2841	9.77107346243687e-10	2.18021962167354e-07	12.8021	PG1_GMTP-WT_GMTP
ENSMUSG00000006517.5	Mvd	-1.5315	4.52675	-16.2637	9.91763946814177e-10	2.19101276685789e-07	12.8633	PG1_GMTP-WT_GMTP
ENSMUSG00000047945.6	Marcksl1	-1.61959	4.22583	-16.1132	1.10747223679177e-09	2.42264980583673e-07	12.7619	PG1_GMTP-WT_GMTP
ENSMUSG00000035042.2	Ccl5	-1.18087	7.52066	-16.0756	1.13858814573389e-09	2.46429325562482e-07	12.6568	PG1_GMTP-WT_GMTP
ENSMUSG00000022389.15	Tef	0.832124	6.44031	16.0638	1.14859722397249e-09	2.46429325562482e-07	12.6633	PG1_GMTP-WT_GMTP
ENSMUSG00000023991.16	Foxp4	-1.26449	3.69467	-16.0331	1.17493535388558e-09	2.49679357630943e-07	12.72	PG1_GMTP-WT_GMTP
ENSMUSG00000079293.11	Clec7a	0.814719	10.4974	15.9943	1.20917961523451e-09	2.54532309006865e-07	12.5811	PG1_GMTP-WT_GMTP
ENSMUSG00000006219.12	Fblim1	0.831193	7.99122	15.9433	1.25582210246203e-09	2.5989586856314e-07	12.5506	PG1_GMTP-WT_GMTP
ENSMUSG00000002289.16	Angptl4	1.50533	3.06597	15.9411	1.25795517432972e-09	2.5989586856314e-07	12.6601	PG1_GMTP-WT_GMTP
ENSMUSG00000056220.14	Pla2g4a	-1.05921	4.35733	-15.7702	1.42930044489695e-09	2.92586980064088e-07	12.497	PG1_GMTP-WT_GMTP
ENSMUSG00000032018.14	Sc5d	-0.945951	5.31597	-15.6166	1.60486767024415e-09	3.25540112055978e-07	12.344	PG1_GMTP-WT_GMTP
ENSMUSG00000027452.11	Acss1	0.872975	5.20611	15.478	1.78332904034476e-09	3.58481269164077e-07	12.2388	PG1_GMTP-WT_GMTP
ENSMUSG00000002944.15	Cd36	0.969658	9.31438	15.4623	1.80486468222991e-09	3.59570943344607e-07	12.1662	PG1_GMTP-WT_GMTP
ENSMUSG00000032228.16	Tcf12	0.878555	6.04511	15.4157	1.87044475086771e-09	3.69338351558506e-07	12.1671	PG1_GMTP-WT_GMTP
ENSMUSG00000030208.15	Emp1	0.724038	7.61139	15.3981	1.89583691960559e-09	3.7106850164175e-07	12.1272	PG1_GMTP-WT_GMTP
ENSMUSG00000053040.13	Aph1c	0.710745	7.36882	15.329	1.99928964435981e-09	3.87914346387831e-07	12.0751	PG1_GMTP-WT_GMTP
ENSMUSG00000021591.8	Glrx	-0.791232	5.73424	-15.2996	2.04514620813118e-09	3.93390925362336e-07	12.0823	PG1_GMTP-WT_GMTP
ENSMUSG00000060147.15	Serpinb6a	0.751108	8.71516	15.2291	2.15975741677952e-09	4.11886044791465e-07	11.9822	PG1_GMTP-WT_GMTP
ENSMUSG00000074677.11	Sirpb1c	0.798124	5.58084	15.1629	2.27365090239403e-09	4.29931971060322e-07	11.977	PG1_GMTP-WT_GMTP
ENSMUSG00000046223.10	Plaur	-1.30058	5.32243	-15.1343	2.32490997305239e-09	4.35930388476622e-07	11.9617	PG1_GMTP-WT_GMTP
ENSMUSG00000109209.1	Gm45104	6.69816	-5.90826	15.1041	2.38045079363935e-09	4.4262498798729e-07	5.83278	PG1_GMTP-WT_GMTP
ENSMUSG00000022098.10	Bmp1	-2.19843	1.12681	-15.0808	2.4241283903291e-09	4.47021295648043e-07	11.838	PG1_GMTP-WT_GMTP
ENSMUSG00000032883.15	Acsl3	-0.921391	4.32216	-15.066	2.45233650110554e-09	4.48516265157115e-07	11.9468	PG1_GMTP-WT_GMTP
ENSMUSG00000056498.13	Tmem154	0.847928	5.64089	15.0535	2.47651438890819e-09	4.49255817558605e-07	11.8869	PG1_GMTP-WT_GMTP
ENSMUSG00000021477.9	Ctsl	0.765386	10.9175	15.0131	2.55615870784858e-09	4.59265230399582e-07	11.8036	PG1_GMTP-WT_GMTP
ENSMUSG00000034247.9	Plekhm1	0.7157	7.99439	15.0048	2.5728568009657e-09	4.59265230399582e-07	11.8057	PG1_GMTP-WT_GMTP
ENSMUSG00000047473.14	Zfp30	2.40517	1.41894	14.9447	2.69753546595447e-09	4.77699276601922e-07	11.7952	PG1_GMTP-WT_GMTP
ENSMUSG00000036381.13	P2ry14	0.781645	6.0964	14.7674	3.10456778938462e-09	5.44888170736062e-07	11.6411	PG1_GMTP-WT_GMTP
ENSMUSG00000095788.6	Sirpb1a	1.25208	3.67805	14.7481	3.15286537468199e-09	5.44888170736062e-07	11.7225	PG1_GMTP-WT_GMTP
ENSMUSG00000030737.17	Slco2b1	1.26615	3.92491	14.7439	3.16352586299079e-09	5.44888170736062e-07	11.7065	PG1_GMTP-WT_GMTP
ENSMUSG00000031129.9	Slc9a9	1.13853	5.46898	14.7395	3.17462744569032e-09	5.44888170736062e-07	11.6351	PG1_GMTP-WT_GMTP
ENSMUSG00000030433.15	Sbk2	2.78779	1.27594	14.6716	3.35176652928458e-09	5.70900508152114e-07	11.5701	PG1_GMTP-WT_GMTP
ENSMUSG00000033105.12	Lss	-0.92201	4.59025	-14.6137	3.51122013242983e-09	5.93529203143234e-07	11.5653	PG1_GMTP-WT_GMTP
ENSMUSG00000030142.10	Clec4e	-2.75813	5.08841	-14.5924	3.5720892043234e-09	5.99278394105774e-07	11.5263	PG1_GMTP-WT_GMTP
ENSMUSG00000066621.12	Tecpr1	0.859121	8.20068	14.5351	3.74125337338353e-09	6.22974526270946e-07	11.4139	PG1_GMTP-WT_GMTP
ENSMUSG00000026675.12	Hsd17b7	-1.66098	2.87762	-14.5026	3.84070447394309e-09	6.34797325385868e-07	11.5519	PG1_GMTP-WT_GMTP
ENSMUSG00000035783.9	Acta2	-1.51233	1.93333	-14.4854	3.89482839760466e-09	6.3659114987004e-07	11.5102	PG1_GMTP-WT_GMTP
ENSMUSG00000022094.15	Slc39a14	-1.07174	3.77185	-14.481	3.90861773549928e-09	6.3659114987004e-07	11.4991	PG1_GMTP-WT_GMTP
ENSMUSG00000023022.14	Lima1	0.727481	6.46156	14.465	3.95982711666242e-09	6.40258133725279e-07	11.3804	PG1_GMTP-WT_GMTP
ENSMUSG00000037239.8	Spred3	-2.48704	0.574319	-14.4367	4.05204552127994e-09	6.50455336088628e-07	11.2416	PG1_GMTP-WT_GMTP
ENSMUSG00000028494.12	Plin2	0.715704	10.1093	14.3124	4.48486767762559e-09	7.14791803506141e-07	11.2165	PG1_GMTP-WT_GMTP
ENSMUSG00000037224.15	Zfyve28	1.26523	5.63302	14.274	4.62824132316265e-09	7.32410983288853e-07	11.2394	PG1_GMTP-WT_GMTP
ENSMUSG00000017057.9	Il13ra1	-1.22642	4.44934	-14.2337	4.7843803560728e-09	7.517878794722e-07	11.254	PG1_GMTP-WT_GMTP
ENSMUSG00000028364.15	Tnc	-2.48864	1.61604	-14.2196	4.84034856625584e-09	7.55263619292773e-07	11.2732	PG1_GMTP-WT_GMTP
ENSMUSG00000023947.8	Nfkbie	-1.17707	4.27645	-14.1637	5.06908560551049e-09	7.85461854970525e-07	11.2041	PG1_GMTP-WT_GMTP
ENSMUSG00000001542.7	Ell2	-0.983747	6.92741	-14.1372	5.18128097404385e-09	7.97309809474762e-07	11.0915	PG1_GMTP-WT_GMTP
ENSMUSG00000042613.9	Pbxip1	-0.732593	6.9518	-14.1021	5.33453705000202e-09	8.10054194077337e-07	11.0607	PG1_GMTP-WT_GMTP
ENSMUSG00000102037.1	Bcl2a1a	-2.27648	1.14967	-14.1016	5.33670804147217e-09	8.10054194077337e-07	11.1185	PG1_GMTP-WT_GMTP
ENSMUSG00000069910.2	Spdl1	0.840193	5.10641	14.0556	5.54518584213749e-09	8.36011700646039e-07	11.0706	PG1_GMTP-WT_GMTP
ENSMUSG00000044708.5	Kcnj10	1.56064	4.15399	14.032	5.6551935066782e-09	8.46874716204769e-07	11.0987	PG1_GMTP-WT_GMTP
ENSMUSG00000020057.2	Dram1	-0.988928	6.65566	-13.901	6.31141643701987e-09	9.38844233061495e-07	10.8911	PG1_GMTP-WT_GMTP
ENSMUSG00000027995.10	Tlr2	-1.0218	6.51136	-13.8888	6.37631025064459e-09	9.40916949288345e-07	10.8834	PG1_GMTP-WT_GMTP
ENSMUSG00000034168.7	Irf2bpl	-0.974411	6.06358	-13.8826	6.40968835619722e-09	9.40916949288345e-07	10.8887	PG1_GMTP-WT_GMTP
ENSMUSG00000035439.13	Haus8	0.882654	5.94788	13.8439	6.6224619469231e-09	9.65797342625459e-07	10.8579	PG1_GMTP-WT_GMTP
ENSMUSG00000019528.18	Gyg	0.612701	8.24593	13.7822	6.97734502836538e-09	1.0078847984776e-06	10.763	PG1_GMTP-WT_GMTP
ENSMUSG00000097842.2	9330104G04Rik	-3.28334	-0.530271	-13.7781	7.0013957676703e-09	1.0078847984776e-06	10.3642	PG1_GMTP-WT_GMTP
ENSMUSG00000028266.17	Lmo4	-0.96326	6.0075	-13.7337	7.27069584342497e-09	1.03994254073296e-06	10.759	PG1_GMTP-WT_GMTP
ENSMUSG00000071042.12	Rasgrp3	0.972876	4.94685	13.6818	7.59899278530993e-09	1.07997659884472e-06	10.7508	PG1_GMTP-WT_GMTP
ENSMUSG00000073739.3	Gm16287	1.8632	0.980742	13.6501	7.80782755861012e-09	1.10263326781815e-06	10.7384	PG1_GMTP-WT_GMTP
ENSMUSG00000025372.16	Baiap2	0.969849	5.58393	13.6363	7.90021619696426e-09	1.10272235048724e-06	10.6855	PG1_GMTP-WT_GMTP
ENSMUSG00000028327.14	Stra6l	0.888485	5.66403	13.6353	7.90729960462321e-09	1.10272235048724e-06	10.6818	PG1_GMTP-WT_GMTP
ENSMUSG00000029373.7	Pf4	1.65471	2.70896	13.6074	8.09877780421504e-09	1.12241011891584e-06	10.8104	PG1_GMTP-WT_GMTP
ENSMUSG00000032554.15	Trf	0.74647	8.83401	13.5824	8.27436284630728e-09	1.13840974860174e-06	10.5802	PG1_GMTP-WT_GMTP
ENSMUSG00000032232.14	Cgnl1	1.27887	3.42598	13.5765	8.31626356931313e-09	1.13840974860174e-06	10.7502	PG1_GMTP-WT_GMTP
ENSMUSG00000035121.6	Neil2	1.33628	1.99581	13.5561	8.46328823195088e-09	1.15147164828976e-06	10.7628	PG1_GMTP-WT_GMTP
ENSMUSG00000026043.18	Col3a1	-2.0812	1.60318	-13.5018	8.86903592407302e-09	1.19936241559904e-06	10.6944	PG1_GMTP-WT_GMTP
ENSMUSG00000042286.13	Stab1	1.04885	9.07329	13.4865	8.98675639853636e-09	1.20796081638881e-06	10.4925	PG1_GMTP-WT_GMTP
ENSMUSG00000047139.9	Cd24a	1.35013	3.68295	13.4747	9.07884178628433e-09	1.21303111842732e-06	10.6436	PG1_GMTP-WT_GMTP
ENSMUSG00000079017.3	Ifi27l2a	0.714577	6.50302	13.4336	9.40810836093827e-09	1.24954239200962e-06	10.478	PG1_GMTP-WT_GMTP
ENSMUSG00000000555.8	Itga5	-0.716751	7.29359	-13.4192	9.52605208206848e-09	1.25772071069346e-06	10.4497	PG1_GMTP-WT_GMTP
ENSMUSG00000022235.15	Cmbl	1.34102	2.61099	13.3833	9.82834112860998e-09	1.28999868001573e-06	10.6193	PG1_GMTP-WT_GMTP
ENSMUSG00000028957.12	Per3	1.23961	3.17609	13.3405	1.02015439732901e-08	1.33115234313464e-06	10.5579	PG1_GMTP-WT_GMTP
ENSMUSG00000044162.12	Tnip3	-0.759822	5.61527	-13.3025	1.054538369009e-08	1.36599732329389e-06	10.3838	PG1_GMTP-WT_GMTP
ENSMUSG00000023832.14	Acat2	-1.53597	3.04067	-13.2976	1.05910248254311e-08	1.36599732329389e-06	10.5275	PG1_GMTP-WT_GMTP
ENSMUSG00000028328.13	Tmod1	1.47437	1.7973	13.2887	1.0673617386865e-08	1.36637663421744e-06	10.5283	PG1_GMTP-WT_GMTP
ENSMUSG00000026748.13	Plxdc2	1.12153	5.24816	13.2817	1.07390840560509e-08	1.36637663421744e-06	10.3785	PG1_GMTP-WT_GMTP
ENSMUSG00000022463.8	Srebf2	-0.689453	7.18425	-13.2777	1.07776761359866e-08	1.36637663421744e-06	10.3225	PG1_GMTP-WT_GMTP
ENSMUSG00000032261.16	Sh3bgrl2	0.688659	6.25587	13.2685	1.08640528572788e-08	1.36954582714385e-06	10.3338	PG1_GMTP-WT_GMTP
ENSMUSG00000017390.15	Aldoc	-0.892504	4.00493	-13.2487	1.10550428563441e-08	1.38103216298728e-06	10.4189	PG1_GMTP-WT_GMTP
ENSMUSG00000031385.14	Plxnb3	1.58979	2.47434	13.2462	1.10789565354154e-08	1.38103216298728e-06	10.5025	PG1_GMTP-WT_GMTP
ENSMUSG00000022126.6	Acod1	-2.4273	5.84823	-13.1983	1.15558151877482e-08	1.43247169046791e-06	10.2808	PG1_GMTP-WT_GMTP
ENSMUSG00000059994.10	Fcrl1	0.956193	4.31786	13.173	1.18160835476801e-08	1.45337735310446e-06	10.3287	PG1_GMTP-WT_GMTP
ENSMUSG00000029650.10	Slc46a3	0.748385	6.61228	13.1693	1.18547339338059e-08	1.45337735310446e-06	10.2342	PG1_GMTP-WT_GMTP
ENSMUSG00000056999.15	Ide	-0.830917	6.12972	-13.1421	1.2142775180147e-08	1.4805559704624e-06	10.221	PG1_GMTP-WT_GMTP
ENSMUSG00000076435.3	Acsf2	1.13555	3.9923	13.063	1.30248180737467e-08	1.57947155260603e-06	10.2508	PG1_GMTP-WT_GMTP
ENSMUSG00000022237.17	Ankrd33b	1.21618	3.60934	13.0448	1.32371612136031e-08	1.59654474680608e-06	10.2625	PG1_GMTP-WT_GMTP
ENSMUSG00000028927.6	Padi2	0.788791	4.94121	13.0356	1.33465576365366e-08	1.60097035391896e-06	10.1664	PG1_GMTP-WT_GMTP
ENSMUSG00000030117.5	Gdf3	-0.904522	4.68681	-13.0284	1.34319524672191e-08	1.60097035391896e-06	10.1733	PG1_GMTP-WT_GMTP
ENSMUSG00000024772.9	Ehd1	-0.97394	5.85943	-13.0237	1.34891061953464e-08	1.60097035391896e-06	10.1191	PG1_GMTP-WT_GMTP
ENSMUSG00000002602.16	Axl	0.726461	7.60017	13.0157	1.35854955380566e-08	1.60387916370718e-06	10.0737	PG1_GMTP-WT_GMTP
ENSMUSG00000004359.16	Spic	1.67663	1.69145	12.9763	1.40721797582847e-08	1.65259235235056e-06	10.255	PG1_GMTP-WT_GMTP
ENSMUSG00000055546.6	Timd4	2.25301	0.669354	12.9602	1.42754061666403e-08	1.66768134971856e-06	10.1283	PG1_GMTP-WT_GMTP
ENSMUSG00000064225.6	Paqr9	1.68771	0.85497	12.9357	1.4592858486684e-08	1.69588776777802e-06	10.1388	PG1_GMTP-WT_GMTP
ENSMUSG00000027330.16	Cdc25b	0.841379	4.83881	12.9136	1.48847382798623e-08	1.72084541574387e-06	10.0582	PG1_GMTP-WT_GMTP
ENSMUSG00000040511.14	Pvr	-0.876967	3.70819	-12.8833	1.52953303395702e-08	1.75919951477747e-06	10.1066	PG1_GMTP-WT_GMTP
ENSMUSG00000037318.10	Traf3ip3	0.92747	4.57773	12.8514	1.57404995660147e-08	1.80111675290506e-06	10.015	PG1_GMTP-WT_GMTP
ENSMUSG00000105504.4	Gbp5	-1.60992	4.85155	-12.8271	1.60902325641595e-08	1.8317416285923e-06	9.97661	PG1_GMTP-WT_GMTP
ENSMUSG00000025044.16	Msr1	-0.754464	8.38554	-12.8022	1.64567309993119e-08	1.86395451161242e-06	9.86358	PG1_GMTP-WT_GMTP
ENSMUSG00000004709.14	Cd244a	-1.3868	1.91496	-12.7732	1.68935031058525e-08	1.88890799915113e-06	10.0846	PG1_GMTP-WT_GMTP
ENSMUSG00000039908.14	Slc26a11	0.884893	5.69696	12.7696	1.69495995459837e-08	1.88890799915113e-06	9.88613	PG1_GMTP-WT_GMTP
ENSMUSG00000024378.9	Stard4	-1.07898	4.99889	-12.7663	1.70007001785775e-08	1.88890799915113e-06	9.91179	PG1_GMTP-WT_GMTP
ENSMUSG00000029915.14	Clec5a	-0.893494	4.93402	-12.7653	1.70156638654317e-08	1.88890799915113e-06	9.91417	PG1_GMTP-WT_GMTP
ENSMUSG00000094796.2	BC147527	1.3162	2.57945	12.742	1.73791776969034e-08	1.91457822522626e-06	10.0497	PG1_GMTP-WT_GMTP
ENSMUSG00000074794.10	Arrdc3	1.31466	5.96413	12.7395	1.74185174436844e-08	1.91457822522626e-06	9.849	PG1_GMTP-WT_GMTP
ENSMUSG00000037405.8	Icam1	-1.12751	6.56083	-12.6886	1.82447672686529e-08	1.99556613757574e-06	9.78453	PG1_GMTP-WT_GMTP
ENSMUSG00000023885.9	Thbs2	-2.53318	1.21309	-12.6585	1.87527954383361e-08	2.04112743714923e-06	9.9456	PG1_GMTP-WT_GMTP
ENSMUSG00000021175.15	Cdca7l	0.752887	4.73437	12.6516	1.88705078813042e-08	2.0419680866908e-06	9.81734	PG1_GMTP-WT_GMTP
ENSMUSG00000045671.17	Spred2	-1.32759	3.03701	-12.6474	1.89435483325862e-08	2.0419680866908e-06	9.93812	PG1_GMTP-WT_GMTP
ENSMUSG00000022358.7	Fbxo32	1.04215	4.3578	12.5892	1.9980742258805e-08	2.14341491356113e-06	9.78195	PG1_GMTP-WT_GMTP
ENSMUSG00000117465.1	Gm49980	1.56476	1.4598	12.5652	2.04258662766349e-08	2.15271535129915e-06	9.88207	PG1_GMTP-WT_GMTP
ENSMUSG00000040229.11	Gpr34	2.28695	0.944663	12.5649	2.04322331580405e-08	2.15271535129915e-06	9.83615	PG1_GMTP-WT_GMTP
ENSMUSG00000034570.12	Inpp5j	1.28712	3.40026	12.5641	2.04467519197359e-08	2.15271535129915e-06	9.83314	PG1_GMTP-WT_GMTP
ENSMUSG00000027199.14	Gatm	0.687649	5.87141	12.5638	2.04533525064053e-08	2.15271535129915e-06	9.68403	PG1_GMTP-WT_GMTP
ENSMUSG00000030159.15	Clec1b	1.92954	1.66208	12.5398	2.09093035978127e-08	2.18905681234944e-06	9.869	PG1_GMTP-WT_GMTP
ENSMUSG00000005107.13	Slc2a9	0.821921	4.29008	12.5354	2.09948531278976e-08	2.18905681234944e-06	9.73549	PG1_GMTP-WT_GMTP
ENSMUSG00000024589.18	Nedd4l	0.639828	5.95111	12.4495	2.27285825788363e-08	2.35751817749131e-06	9.57128	PG1_GMTP-WT_GMTP
ENSMUSG00000074420.5	Gm10693	2.03934	-0.137543	12.4451	2.28218494302928e-08	2.35751817749131e-06	9.51763	PG1_GMTP-WT_GMTP
ENSMUSG00000025153.9	Fasn	-1.05685	6.05588	-12.3979	2.38422053076e-08	2.45157201395612e-06	9.518	PG1_GMTP-WT_GMTP
ENSMUSG00000027358.6	Bmp2	2.90241	0.689546	12.3889	2.40428070927427e-08	2.45834459188184e-06	9.64986	PG1_GMTP-WT_GMTP
ENSMUSG00000029534.17	St7	-1.20818	2.91976	-12.3851	2.41284213517735e-08	2.45834459188184e-06	9.70025	PG1_GMTP-WT_GMTP
ENSMUSG00000022529.11	Zfp263	-0.561134	6.28608	-12.3267	2.54804546800391e-08	2.58429720579869e-06	9.44188	PG1_GMTP-WT_GMTP
ENSMUSG00000018476.7	Kdm6b	0.987283	3.47567	12.306	2.59766871746964e-08	2.62270507207692e-06	9.58117	PG1_GMTP-WT_GMTP
ENSMUSG00000018593.13	Sparc	-1.51982	3.407	-12.2994	2.61383457619877e-08	2.62713922967222e-06	9.58077	PG1_GMTP-WT_GMTP
ENSMUSG00000040084.9	Bub1b	0.830379	4.37873	12.2836	2.65287797753392e-08	2.63055045364552e-06	9.48628	PG1_GMTP-WT_GMTP
ENSMUSG00000020841.5	Cpd	-1.22113	7.43111	-12.2804	2.66085332025022e-08	2.63055045364552e-06	9.37184	PG1_GMTP-WT_GMTP
ENSMUSG00000035547.14	Capn5	0.58353	5.59008	12.2792	2.6637136054938e-08	2.63055045364552e-06	9.41784	PG1_GMTP-WT_GMTP
ENSMUSG00000074358.9	Ccdc61	-1.34076	3.12192	-12.279	2.66438579538336e-08	2.63055045364552e-06	9.58458	PG1_GMTP-WT_GMTP
ENSMUSG00000034220.7	Gpc1	-0.791864	5.93765	-12.2681	2.6917210764494e-08	2.64583138232667e-06	9.39478	PG1_GMTP-WT_GMTP
ENSMUSG00000021895.10	Arhgef3	0.756235	5.12072	12.2629	2.70495268995438e-08	2.64717584960316e-06	9.42192	PG1_GMTP-WT_GMTP
ENSMUSG00000021775.11	Nr1d2	0.846444	5.93309	12.2505	2.73666003997893e-08	2.66651071930348e-06	9.3776	PG1_GMTP-WT_GMTP
ENSMUSG00000040987.15	Mill2	1.33389	3.24808	12.1963	2.87987719341149e-08	2.7881860290881e-06	9.49479	PG1_GMTP-WT_GMTP
ENSMUSG00000027962.14	Vcam1	0.846974	5.18285	12.1938	2.88652791072178e-08	2.7881860290881e-06	9.35107	PG1_GMTP-WT_GMTP
ENSMUSG00000038175.10	Mylip	0.603793	6.48867	12.1885	2.90116936056003e-08	2.79024965267999e-06	9.30066	PG1_GMTP-WT_GMTP
ENSMUSG00000052270.7	Fpr2	-2.10685	1.34446	-12.1727	2.94467673945466e-08	2.81993871619965e-06	9.52242	PG1_GMTP-WT_GMTP
ENSMUSG00000026042.16	Col5a2	-2.246	1.94999	-12.1218	3.09008786598763e-08	2.94654404075992e-06	9.48986	PG1_GMTP-WT_GMTP
ENSMUSG00000053338.9	Tarm1	-4.78145	-1.90938	-12.0809	3.21228621051217e-08	3.05003158362374e-06	8.42107	PG1_GMTP-WT_GMTP
ENSMUSG00000045092.8	S1pr1	0.730681	4.73808	12.0533	3.29782971614975e-08	3.10121388617172e-06	9.23597	PG1_GMTP-WT_GMTP
ENSMUSG00000035246.16	Pcyt1b	1.58511	0.816195	12.0523	3.30091996154617e-08	3.10121388617172e-06	9.36954	PG1_GMTP-WT_GMTP
ENSMUSG00000021701.8	Plk2	0.598326	8.03117	12.0501	3.30788735225595e-08	3.10121388617172e-06	9.1348	PG1_GMTP-WT_GMTP
ENSMUSG00000010307.7	Tmem86a	0.661732	7.3741	12.0306	3.37006724365616e-08	3.14628913839748e-06	9.1249	PG1_GMTP-WT_GMTP
ENSMUSG00000038456.9	Dennd2a	0.681362	5.06258	12.0223	3.39670800134985e-08	3.15794773475497e-06	9.18711	PG1_GMTP-WT_GMTP
ENSMUSG00000033316.14	Galnt9	0.989699	3.76652	11.964	3.59155497638371e-08	3.32524341029252e-06	9.22201	PG1_GMTP-WT_GMTP
ENSMUSG00000029672.16	Fam3c	0.54596	6.453	11.9568	3.61643847941207e-08	3.33444594178188e-06	9.07063	PG1_GMTP-WT_GMTP
ENSMUSG00000037759.6	Ptger2	1.15401	3.13788	11.9472	3.64999123528388e-08	3.35153310423413e-06	9.26159	PG1_GMTP-WT_GMTP
ENSMUSG00000062300.14	Nectin2	-1.05898	3.80557	-11.9044	3.80325341083247e-08	3.47372139592563e-06	9.15936	PG1_GMTP-WT_GMTP
ENSMUSG00000043832.13	Clec4a3	0.632182	7.09298	11.9015	3.8141968448966e-08	3.47372139592563e-06	9.00021	PG1_GMTP-WT_GMTP
ENSMUSG00000058317.12	Ube2e2	-1.16613	2.26077	-11.8655	3.94888219670755e-08	3.58176457134697e-06	9.23875	PG1_GMTP-WT_GMTP
ENSMUSG00000044229.9	Nxpe4	1.22011	2.39098	11.8506	4.00601784240319e-08	3.61584168246907e-06	9.21867	PG1_GMTP-WT_GMTP
ENSMUSG00000021363.14	Mak	1.38384	1.5997	11.8473	4.0188622652818e-08	3.61584168246907e-06	9.229	PG1_GMTP-WT_GMTP
ENSMUSG00000016552.13	Foxred2	0.797993	5.02784	11.8357	4.06398712110594e-08	3.64175681257979e-06	9.00155	PG1_GMTP-WT_GMTP
ENSMUSG00000048126.16	Col6a3	-1.53327	1.78013	-11.8305	4.08463607117465e-08	3.6456193862448e-06	9.21456	PG1_GMTP-WT_GMTP
ENSMUSG00000031355.16	Arhgap6	0.722957	5.73806	11.8172	4.13760616677663e-08	3.67818352188394e-06	8.95161	PG1_GMTP-WT_GMTP
ENSMUSG00000085129.1	5031425F14Rik	2.2264	1.2524	11.7948	4.22862837828289e-08	3.74418194462802e-06	9.16795	PG1_GMTP-WT_GMTP
ENSMUSG00000041058.15	Wwp1	0.969631	8.10889	11.7819	4.28178794944755e-08	3.77626618640408e-06	8.8628	PG1_GMTP-WT_GMTP
ENSMUSG00000022885.16	St6gal1	0.809161	6.20227	11.7748	4.31147235777723e-08	3.7874756976017e-06	8.89328	PG1_GMTP-WT_GMTP
ENSMUSG00000049598.9	Vsig8	1.23286	2.43599	11.7532	4.40279013545803e-08	3.85252769774412e-06	9.12127	PG1_GMTP-WT_GMTP
ENSMUSG00000021423.6	Ly86	0.601334	7.39562	11.7376	4.47048637638359e-08	3.8964829107909e-06	8.82785	PG1_GMTP-WT_GMTP
ENSMUSG00000043300.2	B3galnt1	0.75928	5.14733	11.7043	4.61806437693911e-08	4.00945021177597e-06	8.86192	PG1_GMTP-WT_GMTP
ENSMUSG00000028859.14	Csf3r	0.669327	6.93765	11.6915	4.67630948479037e-08	4.04428269512122e-06	8.78948	PG1_GMTP-WT_GMTP
ENSMUSG00000026764.15	Kif5c	1.02281	3.7233	11.6697	4.77711498416629e-08	4.11551222554836e-06	8.93086	PG1_GMTP-WT_GMTP
ENSMUSG00000058818.13	Pirb	-0.488136	9.14727	-11.6423	4.90678093298633e-08	4.21096165222016e-06	8.7109	PG1_GMTP-WT_GMTP
ENSMUSG00000055148.7	Klf2	1.07723	3.96254	11.6306	4.96391131834585e-08	4.24366870675291e-06	8.8694	PG1_GMTP-WT_GMTP
ENSMUSG00000057706.7	Mex3b	1.69718	2.01198	11.6083	5.07376059080686e-08	4.32102366651425e-06	8.9963	PG1_GMTP-WT_GMTP
ENSMUSG00000026833.18	Olfm1	-0.880574	4.82096	-11.5651	5.29447040583932e-08	4.49184479716702e-06	8.73697	PG1_GMTP-WT_GMTP
ENSMUSG00000041633.14	Kctd12b	1.07078	6.02384	11.5523	5.361834353899e-08	4.53176552797532e-06	8.67018	PG1_GMTP-WT_GMTP
ENSMUSG00000015852.13	Fcrls	0.915996	5.31916	11.5232	5.51803048269052e-08	4.64383072840441e-06	8.6674	PG1_GMTP-WT_GMTP
ENSMUSG00000078780.7	Gm5150	0.977679	3.89613	11.5187	5.54282339632693e-08	4.64383072840441e-06	8.76091	PG1_GMTP-WT_GMTP
ENSMUSG00000022150.16	Dab2	-0.808115	7.03387	-11.5161	5.5568628354949e-08	4.64383072840441e-06	8.6063	PG1_GMTP-WT_GMTP
ENSMUSG00000027423.15	Snx5	0.500581	9.54278	11.5028	5.63082787064139e-08	4.68808441334408e-06	8.56451	PG1_GMTP-WT_GMTP
ENSMUSG00000027291.15	Vps39	0.620229	6.82386	11.4959	5.66918947494292e-08	4.70247675666919e-06	8.58986	PG1_GMTP-WT_GMTP
ENSMUSG00000024401.14	Tnf	-1.69991	3.55851	-11.4789	5.7657526813901e-08	4.7648607251799e-06	8.75217	PG1_GMTP-WT_GMTP
ENSMUSG00000025950.16	Idh1	0.484404	8.69921	11.4722	5.80464108610613e-08	4.77929728982606e-06	8.53707	PG1_GMTP-WT_GMTP
ENSMUSG00000028278.14	Rragd	0.621009	5.85785	11.4631	5.85729681706855e-08	4.80492146614892e-06	8.58308	PG1_GMTP-WT_GMTP
ENSMUSG00000032890.17	Rims3	1.2985	1.89395	11.458	5.88700344145793e-08	4.81160101792128e-06	8.85112	PG1_GMTP-WT_GMTP
ENSMUSG00000020263.14	Appl2	0.640215	6.23456	11.4494	5.93758823116254e-08	4.83523380299014e-06	8.55666	PG1_GMTP-WT_GMTP
ENSMUSG00000030865.4	Chp2	2.57637	-0.0412629	11.4332	6.03391143527449e-08	4.88778152240093e-06	8.6762	PG1_GMTP-WT_GMTP
ENSMUSG00000056153.15	Socs6	0.640286	6.51571	11.4278	6.0664490332738e-08	4.88778152240093e-06	8.52627	PG1_GMTP-WT_GMTP
ENSMUSG00000110235.1	Gm5086	1.55215	2.55961	11.4276	6.0678325716177e-08	4.88778152240093e-06	8.7892	PG1_GMTP-WT_GMTP
ENSMUSG00000026193.15	Fn1	-1.82606	4.65362	-11.3808	6.35826263491468e-08	5.10330626521048e-06	8.55671	PG1_GMTP-WT_GMTP
ENSMUSG00000066026.14	Dhrs3	0.626592	8.55747	11.3665	6.44950865521334e-08	5.15068950343824e-06	8.42746	PG1_GMTP-WT_GMTP
ENSMUSG00000030064.16	Frmd4b	0.695985	7.59668	11.3644	6.46346551769241e-08	5.15068950343824e-06	8.43704	PG1_GMTP-WT_GMTP
ENSMUSG00000060791.15	Gmfg	0.983926	5.67931	11.3511	6.54967457204469e-08	5.17828734141494e-06	8.47255	PG1_GMTP-WT_GMTP
ENSMUSG00000022408.7	Fam83f	0.759911	5.0365	11.3498	6.55872205573e-08	5.17828734141494e-06	8.50078	PG1_GMTP-WT_GMTP
ENSMUSG00000031216.13	Stard8	0.714988	6.45153	11.3484	6.56771979393371e-08	5.17828734141494e-06	8.44465	PG1_GMTP-WT_GMTP
ENSMUSG00000073902.5	Gm1966	2.33521	2.40977	11.3298	6.69159870779188e-08	5.25738175940001e-06	8.70018	PG1_GMTP-WT_GMTP
ENSMUSG00000018474.18	Chd3	0.70268	7.82136	11.3141	6.79789615864226e-08	5.3221563855363e-06	8.38057	PG1_GMTP-WT_GMTP
ENSMUSG00000029482.4	Aacs	-0.79287	4.87186	-11.3084	6.83708410816792e-08	5.33412089879548e-06	8.4668	PG1_GMTP-WT_GMTP
ENSMUSG00000047821.16	Trim16	0.834479	3.92379	11.3037	6.86946849023645e-08	5.34071255828035e-06	8.53562	PG1_GMTP-WT_GMTP
ENSMUSG00000042351.9	Grap2	1.66866	2.24641	11.2874	6.98307032604228e-08	5.41018222864519e-06	8.66674	PG1_GMTP-WT_GMTP
ENSMUSG00000039671.18	Zmynd8	0.62255	7.19579	11.282	7.02101341689468e-08	5.42075682945228e-06	8.35725	PG1_GMTP-WT_GMTP
ENSMUSG00000066510.5	Ankdd1a	1.44882	2.05453	11.264	7.14967084312038e-08	5.48375244142415e-06	8.65211	PG1_GMTP-WT_GMTP
ENSMUSG00000021846.9	Peli2	0.909892	5.22684	11.2637	7.15175888699156e-08	5.48375244142415e-06	8.40022	PG1_GMTP-WT_GMTP
ENSMUSG00000042607.15	Asb4	2.45958	0.612677	11.2269	7.42242313882348e-08	5.67179888686878e-06	8.58287	PG1_GMTP-WT_GMTP
ENSMUSG00000003420.8	Fcgrt	0.881905	5.74097	11.1981	7.64228224893066e-08	5.81987180274368e-06	8.30846	PG1_GMTP-WT_GMTP
ENSMUSG00000027346.15	Gpcpd1	0.681676	5.70805	11.1908	7.69911717954339e-08	5.84321093969904e-06	8.30193	PG1_GMTP-WT_GMTP
ENSMUSG00000034652.12	Cd300a	0.52837	8.40847	11.1592	7.95025688771956e-08	6.0084497333047e-06	8.20872	PG1_GMTP-WT_GMTP
ENSMUSG00000043004.13	Gng2	0.568657	7.13646	11.1567	7.97069475668081e-08	6.0084497333047e-06	8.22507	PG1_GMTP-WT_GMTP
ENSMUSG00000020593.16	Lpin1	0.741214	5.66169	11.1479	8.04224441311453e-08	6.04197305016244e-06	8.25798	PG1_GMTP-WT_GMTP
ENSMUSG00000028238.6	Atp6v0d2	0.531521	9.48828	11.1406	8.10220760904874e-08	6.06152752467562e-06	8.18171	PG1_GMTP-WT_GMTP
ENSMUSG00000028497.12	Hacd4	0.738064	7.87537	11.1381	8.12260444529203e-08	6.06152752467562e-06	8.19253	PG1_GMTP-WT_GMTP
ENSMUSG00000014361.5	Mertk	0.81392	7.2752	11.1312	8.17999145357271e-08	6.08400497678559e-06	8.1951	PG1_GMTP-WT_GMTP
ENSMUSG00000004207.14	Psap	0.68846	14.2684	11.1208	8.2671854205586e-08	6.12842884680811e-06	8.18699	PG1_GMTP-WT_GMTP
ENSMUSG00000038178.16	Slc43a2	0.632846	8.93033	11.0837	8.58596969237085e-08	6.33964303042137e-06	8.12341	PG1_GMTP-WT_GMTP
ENSMUSG00000048078.16	Tenm4	1.39278	1.44208	11.0811	8.60893576936169e-08	6.33964303042137e-06	8.4794	PG1_GMTP-WT_GMTP
ENSMUSG00000020042.15	Btbd11	-1.23465	2.63655	-11.0684	8.72204311108001e-08	6.40180749794501e-06	8.41446	PG1_GMTP-WT_GMTP
ENSMUSG00000021038.17	Vipas39	0.480867	7.56805	11.0487	8.89962929217359e-08	6.48980802631219e-06	8.10112	PG1_GMTP-WT_GMTP
ENSMUSG00000029189.10	Sel1l3	0.640456	5.2737	11.0486	8.90010870815905e-08	6.48980802631219e-06	8.16886	PG1_GMTP-WT_GMTP
ENSMUSG00000036067.12	Slc2a6	-1.04654	6.20799	-11.033	9.04436906892202e-08	6.56304598771524e-06	8.11567	PG1_GMTP-WT_GMTP
ENSMUSG00000020901.13	Pik3r5	-0.500279	8.14956	-11.0314	9.05937419538517e-08	6.56304598771524e-06	8.07412	PG1_GMTP-WT_GMTP
ENSMUSG00000044092.8	C130050O18Rik	1.31163	2.68572	11.0204	9.16194723700003e-08	6.60586477182858e-06	8.36018	PG1_GMTP-WT_GMTP
ENSMUSG00000103847.1	Gm20056	0.773372	3.55714	11.0187	9.17769049104495e-08	6.60586477182858e-06	8.27152	PG1_GMTP-WT_GMTP
ENSMUSG00000071324.11	Armc2	0.934	3.19015	10.9748	9.60230027613973e-08	6.8892645035854e-06	8.2634	PG1_GMTP-WT_GMTP
ENSMUSG00000029761.16	Cald1	-1.18037	2.36478	-10.9706	9.64375734370378e-08	6.89683197468149e-06	8.33337	PG1_GMTP-WT_GMTP
ENSMUSG00000029781.7	Fkbp9	-0.557466	4.06328	-10.9538	9.81266875878174e-08	6.99521016021396e-06	8.15189	PG1_GMTP-WT_GMTP
ENSMUSG00000056758.14	Hmga2	0.74653	4.07198	10.9191	1.01707870946005e-07	7.22450589924798e-06	8.11373	PG1_GMTP-WT_GMTP
ENSMUSG00000019194.15	Scn1b	-1.06915	2.952	-10.9164	1.01990738953216e-07	7.22450589924798e-06	8.22566	PG1_GMTP-WT_GMTP
ENSMUSG00000072769.6	Gm10419	0.708539	3.03319	10.9003	1.03706732767231e-07	7.32281116530134e-06	8.2003	PG1_GMTP-WT_GMTP
ENSMUSG00000059013.12	Sh2d3c	0.671396	5.52591	10.8955	1.04222471123126e-07	7.33601261252461e-06	7.99177	PG1_GMTP-WT_GMTP
ENSMUSG00000024529.14	Lox	-1.11939	4.30228	-10.8756	1.06403071684963e-07	7.46594886322821e-06	8.04608	PG1_GMTP-WT_GMTP
ENSMUSG00000006154.13	Eps8l1	-1.52687	2.2149	-10.8711	1.06904891809447e-07	7.47764530076552e-06	8.23912	PG1_GMTP-WT_GMTP
ENSMUSG00000095028.6	Sirpb1b	0.759972	4.19154	10.8623	1.07881834606588e-07	7.52239804867748e-06	8.0414	PG1_GMTP-WT_GMTP
ENSMUSG00000098055.1	Gm26947	1.16554	2.20206	10.8574	1.0843396242344e-07	7.53734269020005e-06	8.22558	PG1_GMTP-WT_GMTP
ENSMUSG00000031375.17	Bgn	-1.45991	3.15364	-10.8184	1.12928838131348e-07	7.82540734541852e-06	8.10019	PG1_GMTP-WT_GMTP
ENSMUSG00000010406.12	Mrpl52	-0.924295	4.06815	-10.8105	1.13866246530676e-07	7.82674710136701e-06	7.99648	PG1_GMTP-WT_GMTP
ENSMUSG00000075010.5	AW112010	-0.836767	5.03862	-10.8074	1.14228558623327e-07	7.82674710136701e-06	7.9198	PG1_GMTP-WT_GMTP
ENSMUSG00000031451.6	Gas6	0.602428	7.92232	10.8059	1.14414044480074e-07	7.82674710136701e-06	7.83131	PG1_GMTP-WT_GMTP
ENSMUSG00000022180.7	Slc7a8	-0.579088	6.55179	-10.8019	1.14895920278256e-07	7.82674710136701e-06	7.85428	PG1_GMTP-WT_GMTP
ENSMUSG00000034612.7	Chst11	-0.790572	4.51216	-10.7996	1.15169840256073e-07	7.82674710136701e-06	7.94636	PG1_GMTP-WT_GMTP
ENSMUSG00000041707.8	Tmem273	1.01931	4.97517	10.7985	1.15294643721109e-07	7.82674710136701e-06	7.91373	PG1_GMTP-WT_GMTP
ENSMUSG00000035673.10	Sbno2	-0.649776	6.9428	-10.7976	1.15403567263467e-07	7.82674710136701e-06	7.84	PG1_GMTP-WT_GMTP
ENSMUSG00000031613.9	Hpgd	0.929827	4.67581	10.7914	1.1615234111048e-07	7.85365814302469e-06	7.92542	PG1_GMTP-WT_GMTP
ENSMUSG00000024679.10	Ms4a6d	-0.640278	8.00888	-10.7802	1.17522780931812e-07	7.91335076416758e-06	7.80189	PG1_GMTP-WT_GMTP
ENSMUSG00000020823.16	Sec14l1	0.621696	7.51457	10.7769	1.17930652692411e-07	7.91335076416758e-06	7.80582	PG1_GMTP-WT_GMTP
ENSMUSG00000030649.18	Anapc15	0.778629	3.42499	10.7756	1.18099126270237e-07	7.91335076416758e-06	8.02453	PG1_GMTP-WT_GMTP
ENSMUSG00000042842.11	Serpinb6b	1.00596	3.70212	10.7601	1.20025530856041e-07	8.01835230536183e-06	7.97804	PG1_GMTP-WT_GMTP
ENSMUSG00000086109.2	Gm13391	1.57299	1.2564	10.7567	1.2045225403859e-07	8.02283923690465e-06	8.14843	PG1_GMTP-WT_GMTP
ENSMUSG00000034265.8	Zdhhc14	0.701684	5.65312	10.7484	1.21504210864807e-07	8.06881981257869e-06	7.82533	PG1_GMTP-WT_GMTP
ENSMUSG00000037553.14	Zdhhc18	-0.65142	5.42511	-10.7261	1.24383636448873e-07	8.23552546018904e-06	7.81066	PG1_GMTP-WT_GMTP
ENSMUSG00000052160.7	Pld4	0.591963	9.58874	10.7047	1.27209698503579e-07	8.39772190150996e-06	7.70623	PG1_GMTP-WT_GMTP
ENSMUSG00000026170.6	Cyp27a1	0.932196	5.63187	10.7013	1.27675052531787e-07	8.40357949009369e-06	7.77421	PG1_GMTP-WT_GMTP
ENSMUSG00000025225.15	Nfkb2	-0.735221	6.28371	-10.6882	1.29438854701663e-07	8.49461519105355e-06	7.73663	PG1_GMTP-WT_GMTP
ENSMUSG00000030156.5	Cd69	-1.96372	1.63276	-10.6821	1.30282918435387e-07	8.51029526570821e-06	8.06723	PG1_GMTP-WT_GMTP
ENSMUSG00000061578.8	Ksr2	1.48686	4.34346	10.6809	1.30440594311487e-07	8.51029526570821e-06	7.82987	PG1_GMTP-WT_GMTP
ENSMUSG00000079020.9	Slc45a4	0.644397	6.48427	10.6746	1.31320362940978e-07	8.54271503878146e-06	7.71564	PG1_GMTP-WT_GMTP
ENSMUSG00000068957.1	4930589L23Rik	1.00922	2.46613	10.6434	1.35707598094444e-07	8.8024524310504e-06	7.97871	PG1_GMTP-WT_GMTP
ENSMUSG00000001918.17	Slc1a5	-0.864359	4.85647	-10.6296	1.37715376752092e-07	8.90679188831719e-06	7.73493	PG1_GMTP-WT_GMTP
ENSMUSG00000059108.4	Ifitm6	1.37199	2.82373	10.6261	1.38217395017068e-07	8.91342408964117e-06	7.92659	PG1_GMTP-WT_GMTP
ENSMUSG00000030365.11	Clec2i	1.55223	1.08959	10.6003	1.42042969660592e-07	9.13287946305559e-06	7.98498	PG1_GMTP-WT_GMTP
ENSMUSG00000019055.15	Plod1	0.63811	7.7352	10.5977	1.42439028958156e-07	9.13287946305559e-06	7.60337	PG1_GMTP-WT_GMTP
ENSMUSG00000050777.7	Tmem37	0.890022	4.92293	10.5949	1.4287137466975e-07	9.13435238683705e-06	7.69227	PG1_GMTP-WT_GMTP
ENSMUSG00000002020.15	Ltbp2	-1.24109	1.66714	-10.5607	1.48158938559056e-07	9.44534398876631e-06	7.93815	PG1_GMTP-WT_GMTP
ENSMUSG00000017417.14	Plxdc1	0.557626	5.94361	10.5324	1.52690924935978e-07	9.70653164699848e-06	7.57425	PG1_GMTP-WT_GMTP
ENSMUSG00000026980.15	Ly75	-1.0318	3.63602	-10.523	1.54234334327889e-07	9.77679176664257e-06	7.72475	PG1_GMTP-WT_GMTP
ENSMUSG00000021025.8	Nfkbia	-0.959115	5.73379	-10.4953	1.58863840264751e-07	1.0013438837823e-05	7.54057	PG1_GMTP-WT_GMTP
ENSMUSG00000038437.11	Mllt6	-0.470177	6.69513	-10.4953	1.58865116684863e-07	1.0013438837823e-05	7.50972	PG1_GMTP-WT_GMTP
ENSMUSG00000048534.7	Jaml	2.12099	-0.408201	10.4323	1.69966069538444e-07	1.0682965942567e-05	7.66496	PG1_GMTP-WT_GMTP
ENSMUSG00000006800.14	Sulf2	0.72547	6.31052	10.3919	1.77507368215549e-07	1.11256233342515e-05	7.40372	PG1_GMTP-WT_GMTP
ENSMUSG00000029254.16	Stap1	-0.808506	6.35329	-10.3883	1.78207442852322e-07	1.11382147685262e-05	7.39831	PG1_GMTP-WT_GMTP
ENSMUSG00000064080.12	Fbln2	-3.39623	-0.508026	-10.3737	1.81026475402657e-07	1.12678038828714e-05	7.58747	PG1_GMTP-WT_GMTP
ENSMUSG00000030474.9	Siglece	-2.02805	1.69485	-10.3722	1.81333126392582e-07	1.12678038828714e-05	7.73536	PG1_GMTP-WT_GMTP
ENSMUSG00000034438.16	Gbp8	0.878929	3.22914	10.3688	1.819910876401e-07	1.12678038828714e-05	7.59922	PG1_GMTP-WT_GMTP
ENSMUSG00000037731.5	Themis2	0.523602	8.49771	10.3672	1.82300775409697e-07	1.12678038828714e-05	7.33377	PG1_GMTP-WT_GMTP
ENSMUSG00000047881.14	Rell1	0.497535	6.65123	10.3534	1.85039264154034e-07	1.13920172864569e-05	7.35039	PG1_GMTP-WT_GMTP
ENSMUSG00000025959.13	Klf7	-0.700977	3.86448	-10.352	1.85331523102401e-07	1.13920172864569e-05	7.50927	PG1_GMTP-WT_GMTP
ENSMUSG00000111818.1	Gm17749	1.11536	2.73796	10.343	1.87138345806764e-07	1.14714777746877e-05	7.62465	PG1_GMTP-WT_GMTP
ENSMUSG00000037196.6	Pacrg	1.32238	2.65051	10.3218	1.91482967624803e-07	1.17056423468828e-05	7.61001	PG1_GMTP-WT_GMTP
ENSMUSG00000001552.14	Jup	0.920028	4.35363	10.3089	1.94178491816652e-07	1.18259148614867e-05	7.41321	PG1_GMTP-WT_GMTP
ENSMUSG00000048924.14	Ccdc125	0.691569	4.01677	10.3073	1.94510408917028e-07	1.18259148614867e-05	7.44332	PG1_GMTP-WT_GMTP
ENSMUSG00000049093.9	Il23r	-5.74602	-4.56864	-10.2763	2.01188224812114e-07	1.21986762506323e-05	5.20116	PG1_GMTP-WT_GMTP
ENSMUSG00000031824.15	6430548M08Rik	0.639917	5.93852	10.2669	2.0324742808073e-07	1.22901351294454e-05	7.27378	PG1_GMTP-WT_GMTP
ENSMUSG00000049744.15	Arhgap15	0.561421	5.05338	10.2608	2.04595788768293e-07	1.23382319859106e-05	7.30791	PG1_GMTP-WT_GMTP
ENSMUSG00000036611.5	Eepd1	0.610292	5.96	10.2545	2.06022572661528e-07	1.23907861557862e-05	7.25876	PG1_GMTP-WT_GMTP
ENSMUSG00000051497.15	Kcnj16	2.31386	0.808615	10.245	2.08170080251667e-07	1.24862876361706e-05	7.60633	PG1_GMTP-WT_GMTP
ENSMUSG00000054843.9	Atrnl1	-1.02405	4.10579	-10.236	2.1020508392321e-07	1.2574547017637e-05	7.35334	PG1_GMTP-WT_GMTP
ENSMUSG00000043939.15	A530064D06Rik	1.53108	1.62299	10.1831	2.22721809838888e-07	1.32876784570458e-05	7.53284	PG1_GMTP-WT_GMTP
ENSMUSG00000087362.7	Gm13710	1.00876	2.66167	10.1787	2.23812248979346e-07	1.33171272306031e-05	7.44904	PG1_GMTP-WT_GMTP
ENSMUSG00000031904.5	Slc7a6	-0.704399	3.68179	-10.1754	2.24630570713247e-07	1.33302710753316e-05	7.32877	PG1_GMTP-WT_GMTP
ENSMUSG00000071203.6	Naip5	0.75146	5.57052	10.1707	2.25771444963405e-07	1.33624356802877e-05	7.17816	PG1_GMTP-WT_GMTP
ENSMUSG00000068264.11	Ap5s1	0.661874	4.58554	10.1548	2.29759143958089e-07	1.35624756061821e-05	7.21794	PG1_GMTP-WT_GMTP
ENSMUSG00000072235.6	Tuba1a	-0.637306	4.75884	-10.1436	2.32606261488526e-07	1.36943100596134e-05	7.19216	PG1_GMTP-WT_GMTP
ENSMUSG00000032515.8	Csrnp1	-0.853008	3.01802	-10.1408	2.33313643676982e-07	1.36998087667487e-05	7.36696	PG1_GMTP-WT_GMTP
ENSMUSG00000027276.7	Jag1	-1.31519	3.19117	-10.126	2.37152703361298e-07	1.38886831236237e-05	7.32991	PG1_GMTP-WT_GMTP
ENSMUSG00000032786.16	Alas1	-0.757218	7.51242	-10.1164	2.39669371588391e-07	1.398250354662e-05	7.05899	PG1_GMTP-WT_GMTP
ENSMUSG00000024222.17	Fkbp5	-0.97876	2.67047	-10.1151	2.40008015881121e-07	1.398250354662e-05	7.37649	PG1_GMTP-WT_GMTP
ENSMUSG00000027227.7	Sord	0.52651	6.25862	10.0868	2.47616710050175e-07	1.43882074253895e-05	7.05515	PG1_GMTP-WT_GMTP
ENSMUSG00000063234.5	Gpr84	-3.03285	-0.301866	-10.0657	2.5345667600311e-07	1.46892956146945e-05	7.3201	PG1_GMTP-WT_GMTP
ENSMUSG00000034858.16	Fam214a	0.976732	5.12829	10.0391	2.61041032693663e-07	1.50631827052605e-05	7.04792	PG1_GMTP-WT_GMTP
ENSMUSG00000039652.16	Cpeb3	0.714393	4.16868	10.0383	2.61258087524573e-07	1.50631827052605e-05	7.12008	PG1_GMTP-WT_GMTP
ENSMUSG00000000440.12	Pparg	0.457297	6.40273	10.0321	2.63058936548021e-07	1.51279228123608e-05	6.98707	PG1_GMTP-WT_GMTP
ENSMUSG00000049123.10	Catsperg2	6.5947	-5.65936	10.0204	2.66520293356039e-07	1.52875766212167e-05	4.35171	PG1_GMTP-WT_GMTP
ENSMUSG00000040111.17	Gramd1b	0.652354	6.40244	10.0035	2.71555795696805e-07	1.55364729984174e-05	6.95361	PG1_GMTP-WT_GMTP
ENSMUSG00000015846.15	Rxra	0.516043	6.77263	9.98511	2.77169982753083e-07	1.58171197574668e-05	6.9218	PG1_GMTP-WT_GMTP
ENSMUSG00000022587.14	Ly6e	0.507287	10.0819	9.98069	2.78538850947959e-07	1.58546871969434e-05	6.87917	PG1_GMTP-WT_GMTP
ENSMUSG00000036833.16	Pnpla7	0.493439	7.90349	9.96038	2.84913388107737e-07	1.61455874619975e-05	6.87033	PG1_GMTP-WT_GMTP
ENSMUSG00000043671.14	Dpy19l3	1.69673	1.36739	9.9583	2.85576954159024e-07	1.61455874619975e-05	7.29437	PG1_GMTP-WT_GMTP
ENSMUSG00000041762.16	Gpr155	0.745766	5.62329	9.95753	2.8582024145068e-07	1.61455874619975e-05	6.92789	PG1_GMTP-WT_GMTP
ENSMUSG00000021356.10	Irf4	1.81786	1.20764	9.94831	2.88777793157973e-07	1.62714618654895e-05	7.28728	PG1_GMTP-WT_GMTP
ENSMUSG00000029098.17	Acox3	0.502143	7.37045	9.92774	2.95491789894552e-07	1.65980220782e-05	6.841	PG1_GMTP-WT_GMTP
ENSMUSG00000051043.16	Gprc5c	0.922376	3.43679	9.92602	2.96061165559253e-07	1.65980220782e-05	7.0703	PG1_GMTP-WT_GMTP
ENSMUSG00000034416.18	Pkd1l2	1.33602	0.895531	9.91359	3.00207399395519e-07	1.67882899817349e-05	7.25104	PG1_GMTP-WT_GMTP
ENSMUSG00000025059.16	Gk	-0.683817	4.94713	-9.882	3.11026851680426e-07	1.73498553538634e-05	6.87486	PG1_GMTP-WT_GMTP
ENSMUSG00000109205.1	Gm44954	3.11856	-1.8242	9.86667	3.1642786716831e-07	1.75876463736867e-05	6.70516	PG1_GMTP-WT_GMTP
ENSMUSG00000027204.13	Fbn1	-1.7957	1.6779	-9.86486	3.17074150873975e-07	1.75876463736867e-05	7.17617	PG1_GMTP-WT_GMTP
ENSMUSG00000023031.8	Cela1	1.09868	2.01642	9.86076	3.18539051504449e-07	1.75876463736867e-05	7.14874	PG1_GMTP-WT_GMTP
ENSMUSG00000036594.15	H2-Aa	0.55411	10.1756	9.85908	3.191392376613e-07	1.75876463736867e-05	6.7356	PG1_GMTP-WT_GMTP
ENSMUSG00000023019.12	Gpd1	1.26846	1.76854	9.85883	3.19230797353252e-07	1.75876463736867e-05	7.16396	PG1_GMTP-WT_GMTP
ENSMUSG00000024063.13	Lbh	0.573563	5.47996	9.85181	3.21759287365446e-07	1.76459730255695e-05	6.8099	PG1_GMTP-WT_GMTP
ENSMUSG00000031906.9	Smpd3	1.23257	2.23679	9.84896	3.22792575571161e-07	1.76459730255695e-05	7.11658	PG1_GMTP-WT_GMTP
ENSMUSG00000021640.6	Naip1	1.36992	0.809419	9.84777	3.23224069474832e-07	1.76459730255695e-05	7.17804	PG1_GMTP-WT_GMTP
ENSMUSG00000035356.17	Nfkbiz	-0.862827	4.78728	-9.84715	3.23452828730243e-07	1.76459730255695e-05	6.84436	PG1_GMTP-WT_GMTP
ENSMUSG00000031673.6	Cdh11	-1.18588	1.03529	-9.83422	3.28196762082825e-07	1.78611081764733e-05	7.16337	PG1_GMTP-WT_GMTP
ENSMUSG00000044485.4	Klk1b11	3.3853	-0.700986	9.83182	3.29084073308716e-07	1.78658222086068e-05	7.01037	PG1_GMTP-WT_GMTP
ENSMUSG00000057406.16	Nsd2	-0.74986	5.76491	-9.8059	3.38847469877695e-07	1.83512223188859e-05	6.74298	PG1_GMTP-WT_GMTP
ENSMUSG00000018920.11	Cxcl16	-0.512829	7.86663	-9.79492	3.43077373892081e-07	1.84954310241213e-05	6.67501	PG1_GMTP-WT_GMTP
ENSMUSG00000027624.20	Epb41l1	0.751869	7.1614	9.79469	3.43168038541936e-07	1.84954310241213e-05	6.68767	PG1_GMTP-WT_GMTP
ENSMUSG00000050370.5	Ch25h	-2.91474	-1.19191	-9.78403	3.47327710916579e-07	1.86745137679076e-05	6.84313	PG1_GMTP-WT_GMTP
ENSMUSG00000106825.1	2510016D11Rik	0.834973	3.71527	9.77027	3.52779181949534e-07	1.89220237664422e-05	6.8549	PG1_GMTP-WT_GMTP
ENSMUSG00000029925.13	Tbxas1	0.569541	6.83655	9.74733	3.62073473641255e-07	1.93739698257969e-05	6.63874	PG1_GMTP-WT_GMTP
ENSMUSG00000032216.15	Nedd4	-1.18688	1.92273	-9.73868	3.65646290295019e-07	1.95183389362506e-05	7.01628	PG1_GMTP-WT_GMTP
ENSMUSG00000024180.14	Tmem8	0.567331	5.89923	9.73249	3.68226023504465e-07	1.96091342779359e-05	6.6501	PG1_GMTP-WT_GMTP
ENSMUSG00000017765.17	Slc12a4	-0.592814	6.16732	-9.72648	3.70746877042739e-07	1.96963692082253e-05	6.63332	PG1_GMTP-WT_GMTP
ENSMUSG00000019872.13	Smpdl3a	0.409852	9.05063	9.70524	3.79812722280342e-07	2.01300742808581e-05	6.55534	PG1_GMTP-WT_GMTP
ENSMUSG00000035150.15	Eif2s3x	-0.70568	6.41678	-9.66208	3.98977755424401e-07	2.10957124568357e-05	6.54808	PG1_GMTP-WT_GMTP
ENSMUSG00000021822.3	Plau	-0.794423	6.60252	-9.65391	4.02715811472621e-07	2.12430210434718e-05	6.53286	PG1_GMTP-WT_GMTP
ENSMUSG00000018339.11	Gpx3	0.575791	5.14526	9.63778	4.1021635395203e-07	2.15876356267256e-05	6.57219	PG1_GMTP-WT_GMTP
ENSMUSG00000031996.17	Aplp2	0.474511	9.78446	9.62918	4.14277171134591e-07	2.17500388694732e-05	6.4607	PG1_GMTP-WT_GMTP
ENSMUSG00000023274.14	Cd4	0.815583	4.96593	9.61101	4.22994451600955e-07	2.21555755835026e-05	6.55082	PG1_GMTP-WT_GMTP
ENSMUSG00000031431.13	Tsc22d3	0.522498	6.7728	9.60642	4.25231255558087e-07	2.21949953013688e-05	6.47093	PG1_GMTP-WT_GMTP
ENSMUSG00000021950.15	Anxa8	-4.78577	-6.13561	-9.60538	4.25736475999903e-07	2.21949953013688e-05	3.85046	PG1_GMTP-WT_GMTP
ENSMUSG00000025283.15	Sat1	0.50024	8.76915	9.6028	4.2700201229569e-07	2.22090813528059e-05	6.43383	PG1_GMTP-WT_GMTP
ENSMUSG00000084918.1	Gm12708	1.70793	0.323386	9.5994	4.28668095272752e-07	2.22438865344672e-05	6.88996	PG1_GMTP-WT_GMTP
ENSMUSG00000115486.1	Gm49017	5.44053	-5.01778	9.58589	4.3537446601719e-07	2.25394674251544e-05	4.51256	PG1_GMTP-WT_GMTP
ENSMUSG00000100658.1	F730311O21Rik	1.17935	1.89354	9.58049	4.38087625043684e-07	2.26274286518512e-05	6.83557	PG1_GMTP-WT_GMTP
ENSMUSG00000024776.18	Stambpl1	0.66312	4.47778	9.56281	4.47089706742053e-07	2.30390591836846e-05	6.52942	PG1_GMTP-WT_GMTP
ENSMUSG00000040093.16	Bmf	0.593196	5.36412	9.53229	4.63104001607857e-07	2.37575861205756e-05	6.43279	PG1_GMTP-WT_GMTP
ENSMUSG00000070436.12	Serpinh1	-1.08155	2.25274	-9.53218	4.63162728564083e-07	2.37575861205756e-05	6.74687	PG1_GMTP-WT_GMTP
ENSMUSG00000027956.11	Tmem144	0.654505	4.18158	9.52205	4.68615791041656e-07	2.39744537320736e-05	6.50775	PG1_GMTP-WT_GMTP
ENSMUSG00000026712.3	Mrc1	0.826467	7.73984	9.52035	4.6953956352423e-07	2.39744537320736e-05	6.34614	PG1_GMTP-WT_GMTP
ENSMUSG00000073242.4	Dnmt3aos	0.757788	3.11605	9.50449	4.78227297069023e-07	2.43622960719203e-05	6.61298	PG1_GMTP-WT_GMTP
ENSMUSG00000001128.7	Cfp	0.680982	7.64386	9.49784	4.81926652706897e-07	2.44948277946446e-05	6.32027	PG1_GMTP-WT_GMTP
ENSMUSG00000047747.10	Rnf150	0.984698	6.30503	9.49267	4.84815667530801e-07	2.45856636127608e-05	6.34628	PG1_GMTP-WT_GMTP
ENSMUSG00000072941.5	Sod3	-2.38374	-0.330141	-9.48778	4.87571787117612e-07	2.46693634602161e-05	6.71184	PG1_GMTP-WT_GMTP
ENSMUSG00000025190.13	Got1	0.460923	6.36103	9.47657	4.93950225763705e-07	2.49355461254876e-05	6.32487	PG1_GMTP-WT_GMTP
ENSMUSG00000032870.8	Smap2	0.459004	7.14075	9.46935	4.98106249383036e-07	2.50885885834846e-05	6.29541	PG1_GMTP-WT_GMTP
ENSMUSG00000060586.11	H2-Eb1	0.673786	10.0097	9.4383	5.16402766469603e-07	2.59515651536852e-05	6.22788	PG1_GMTP-WT_GMTP
ENSMUSG00000036390.8	Gadd45a	0.765072	5.30853	9.42967	5.2161861842272e-07	2.61547780513846e-05	6.3106	PG1_GMTP-WT_GMTP
ENSMUSG00000029762.6	Akr1b8	0.643975	4.14969	9.41834	5.28544325918962e-07	2.64426222964793e-05	6.38493	PG1_GMTP-WT_GMTP
ENSMUSG00000040133.2	Gpr176	0.889514	3.695	9.41545	5.30330586855036e-07	2.64442851138311e-05	6.43224	PG1_GMTP-WT_GMTP
ENSMUSG00000024789.13	Jak2	-0.658978	6.02556	-9.41445	5.30947865862786e-07	2.64442851138311e-05	6.26019	PG1_GMTP-WT_GMTP
ENSMUSG00000033538.13	Casp4	-0.678273	5.30045	-9.4006	5.39593535843387e-07	2.68131229005452e-05	6.2754	PG1_GMTP-WT_GMTP
ENSMUSG00000010051.15	Hyal1	0.879573	2.90604	9.39876	5.40756747422819e-07	2.68131229005452e-05	6.51249	PG1_GMTP-WT_GMTP
ENSMUSG00000019487.11	Trip10	-0.582194	5.13473	-9.39331	5.44208264768216e-07	2.69244323986102e-05	6.27579	PG1_GMTP-WT_GMTP
ENSMUSG00000064267.13	Hvcn1	-0.524875	6.36898	-9.38879	5.47085146701804e-07	2.70068824742419e-05	6.21701	PG1_GMTP-WT_GMTP
ENSMUSG00000079625.2	Tm4sf19	0.811299	3.80473	9.3828	5.50932003574429e-07	2.71367456859961e-05	6.3797	PG1_GMTP-WT_GMTP
ENSMUSG00000031808.7	Slc27a1	0.573408	7.95895	9.37357	5.56905082162438e-07	2.73705354587896e-05	6.16277	PG1_GMTP-WT_GMTP
ENSMUSG00000001119.7	Col6a1	-1.11129	2.8731	-9.36	5.65825080439383e-07	2.77478132304262e-05	6.46977	PG1_GMTP-WT_GMTP
ENSMUSG00000025355.7	Mmp19	0.562315	5.14825	9.35435	5.69581476309848e-07	2.7783422693664e-05	6.22708	PG1_GMTP-WT_GMTP
ENSMUSG00000029699.13	Ssc4d	1.11999	2.87378	9.3536	5.70083166105612e-07	2.7783422693664e-05	6.46194	PG1_GMTP-WT_GMTP
ENSMUSG00000031925.17	Maml2	0.827107	3.91701	9.35329	5.70286720463322e-07	2.7783422693664e-05	6.33057	PG1_GMTP-WT_GMTP
ENSMUSG00000027646.15	Src	-0.848967	5.62026	-9.34729	5.74309557691854e-07	2.79184513306718e-05	6.19405	PG1_GMTP-WT_GMTP
ENSMUSG00000030329.11	Pianp	0.563832	5.84232	9.33282	5.84139532883068e-07	2.8334576950478e-05	6.16669	PG1_GMTP-WT_GMTP
ENSMUSG00000027848.12	Olfml3	-0.873686	3.96807	-9.32795	5.87488164819079e-07	2.84351918039221e-05	6.2939	PG1_GMTP-WT_GMTP
ENSMUSG00000030400.17	Ercc2	-0.95969	3.0692	-9.3259	5.88906346785529e-07	2.84421370472414e-05	6.4032	PG1_GMTP-WT_GMTP
ENSMUSG00000020826.9	Nos2	-2.78861	1.72786	-9.31724	5.94924560435742e-07	2.86707380496819e-05	6.53875	PG1_GMTP-WT_GMTP
ENSMUSG00000026875.14	Traf1	-1.10236	3.66306	-9.3034	6.04686179104075e-07	2.90512897306519e-05	6.29927	PG1_GMTP-WT_GMTP
ENSMUSG00000017009.3	Sdc4	-0.558147	6.54912	-9.30236	6.05425076177705e-07	2.90512897306519e-05	6.1048	PG1_GMTP-WT_GMTP
ENSMUSG00000024245.4	Tmem178	-1.02589	4.32633	-9.30006	6.07067312271012e-07	2.9067581413526e-05	6.22243	PG1_GMTP-WT_GMTP
ENSMUSG00000007655.16	Cav1	-1.28377	1.55023	-9.2981	6.08470261733624e-07	2.90723703427459e-05	6.52862	PG1_GMTP-WT_GMTP
ENSMUSG00000039126.10	Prune2	0.942166	4.81878	9.29327	6.11938370882225e-07	2.91078189381415e-05	6.17292	PG1_GMTP-WT_GMTP
ENSMUSG00000056529.7	Ptafr	0.410122	9.43939	9.29201	6.12848291831441e-07	2.91078189381415e-05	6.04851	PG1_GMTP-WT_GMTP
ENSMUSG00000041515.10	Irf8	0.466706	8.58034	9.29163	6.13125751845405e-07	2.91078189381415e-05	6.05382	PG1_GMTP-WT_GMTP
ENSMUSG00000036862.15	Dchs1	1.11729	2.70576	9.28522	6.17769141005917e-07	2.91639169774651e-05	6.40011	PG1_GMTP-WT_GMTP
ENSMUSG00000085213.1	Gm13091	0.992209	2.02932	9.28491	6.17995993543593e-07	2.91639169774651e-05	6.47453	PG1_GMTP-WT_GMTP
ENSMUSG00000036552.19	Ermard	0.801626	3.98727	9.28362	6.18937749925525e-07	2.91639169774651e-05	6.23729	PG1_GMTP-WT_GMTP
ENSMUSG00000005514.14	Por	0.635569	8.61728	9.2828	6.19535546422195e-07	2.91639169774651e-05	6.04249	PG1_GMTP-WT_GMTP
ENSMUSG00000049985.15	Ankrd55	0.854487	1.79851	9.26753	6.30786918547556e-07	2.96310495022139e-05	6.47398	PG1_GMTP-WT_GMTP
ENSMUSG00000018459.15	Slc13a3	-1.64118	1.92307	-9.26261	6.34463721037866e-07	2.97411533771384e-05	6.45749	PG1_GMTP-WT_GMTP
ENSMUSG00000037370.13	Enpp1	0.542846	4.61824	9.26066	6.35927568664666e-07	2.97472784897583e-05	6.148	PG1_GMTP-WT_GMTP
ENSMUSG00000008496.19	Pou2f2	-0.546519	6.46908	-9.24551	6.47413134309976e-07	3.0211667102575e-05	6.03654	PG1_GMTP-WT_GMTP
ENSMUSG00000021483.8	Cdk20	0.526079	5.59788	9.244	6.48563104115692e-07	3.0211667102575e-05	6.06714	PG1_GMTP-WT_GMTP
ENSMUSG00000032013.6	Trim29	1.30648	2.15489	9.24166	6.50366323701496e-07	3.02325495432322e-05	6.41014	PG1_GMTP-WT_GMTP
ENSMUSG00000023030.16	Slc11a2	-0.463199	6.85844	-9.23907	6.52362096183406e-07	3.02622774472772e-05	6.01773	PG1_GMTP-WT_GMTP
ENSMUSG00000035064.17	Eef2k	0.750612	4.25172	9.23252	6.57430712157357e-07	3.04341317020064e-05	6.14633	PG1_GMTP-WT_GMTP
ENSMUSG00000036875.15	Dna2	0.48216	4.96529	9.22518	6.6317143062409e-07	3.06363232536549e-05	6.07848	PG1_GMTP-WT_GMTP
ENSMUSG00000062980.15	Cped1	1.32803	1.96271	9.2176	6.69153860897332e-07	3.08488225169466e-05	6.39979	PG1_GMTP-WT_GMTP
ENSMUSG00000027244.14	Atg13	0.441399	6.55511	9.20807	6.76752433557948e-07	3.10730273931061e-05	5.98727	PG1_GMTP-WT_GMTP
ENSMUSG00000039809.10	Gabbr2	0.923367	2.30602	9.20801	6.7680237140006e-07	3.10730273931061e-05	6.3534	PG1_GMTP-WT_GMTP
ENSMUSG00000033697.16	Arhgap39	0.606978	5.05177	9.18584	6.94846808562804e-07	3.17205731763222e-05	6.02395	PG1_GMTP-WT_GMTP
ENSMUSG00000109675.2	Nxpe1-ps	0.758616	4.52587	9.18506	6.95488295254467e-07	3.17205731763222e-05	6.06178	PG1_GMTP-WT_GMTP
ENSMUSG00000020493.8	Prr11	1.03391	2.69639	9.18438	6.96055894526955e-07	3.17205731763222e-05	6.27825	PG1_GMTP-WT_GMTP
ENSMUSG00000015961.8	Adss	0.402837	6.58225	9.18373	6.96593055904535e-07	3.17205731763222e-05	5.95605	PG1_GMTP-WT_GMTP
ENSMUSG00000020241.13	Col6a2	-1.22696	2.41887	-9.17074	7.07429633985434e-07	3.21484265236599e-05	6.29523	PG1_GMTP-WT_GMTP
ENSMUSG00000032788.15	Pdxk	0.652211	7.87636	9.16312	7.13870719552486e-07	3.23751978971029e-05	5.90206	PG1_GMTP-WT_GMTP
ENSMUSG00000029651.16	Mtus2	-2.30653	0.0248168	-9.1587	7.17639090275885e-07	3.24800832075574e-05	6.38056	PG1_GMTP-WT_GMTP
ENSMUSG00000027315.13	Spint1	-1.09518	3.19753	-9.15493	7.2086862764312e-07	3.25602058473703e-05	6.17662	PG1_GMTP-WT_GMTP
ENSMUSG00000001403.13	Ube2c	0.80738	3.18011	9.14983	7.25263300579969e-07	3.26753252875275e-05	6.17265	PG1_GMTP-WT_GMTP
ENSMUSG00000030041.9	M1ap	0.888273	3.14618	9.14858	7.26346136450215e-07	3.26753252875275e-05	6.17564	PG1_GMTP-WT_GMTP
ENSMUSG00000040537.17	Adam22	1.22731	1.38546	9.14427	7.30085207893659e-07	3.27774471704853e-05	6.35589	PG1_GMTP-WT_GMTP
ENSMUSG00000038370.6	Pcp4l1	0.582469	5.99776	9.12114	7.50509499042573e-07	3.3626743879793e-05	5.8968	PG1_GMTP-WT_GMTP
ENSMUSG00000030560.17	Ctsc	-0.395496	8.07397	-9.11793	7.53397458940431e-07	3.3688491986649e-05	5.84231	PG1_GMTP-WT_GMTP
ENSMUSG00000027506.15	Tpd52	0.374183	8.82534	9.10774	7.62631548212719e-07	3.40331954705408e-05	5.82139	PG1_GMTP-WT_GMTP
ENSMUSG00000027351.14	Spred1	-0.651859	6.66121	-9.09804	7.71531838408036e-07	3.43616565077815e-05	5.84614	PG1_GMTP-WT_GMTP
ENSMUSG00000066150.12	Slc31a1	-0.440255	6.80356	-9.09568	7.73713690252815e-07	3.43901863956396e-05	5.8393	PG1_GMTP-WT_GMTP
ENSMUSG00000048234.13	Rnf149	-0.582192	8.76615	-9.08555	7.83149099113582e-07	3.46656398835288e-05	5.79386	PG1_GMTP-WT_GMTP
ENSMUSG00000040253.15	Gbp7	-0.743198	5.52666	-9.08485	7.83805940910696e-07	3.46656398835288e-05	5.87121	PG1_GMTP-WT_GMTP
ENSMUSG00000001999.15	Blvra	0.529235	6.66656	9.08404	7.84571690995476e-07	3.46656398835288e-05	5.82833	PG1_GMTP-WT_GMTP
ENSMUSG00000041936.18	Agrn	-0.75423	5.52187	-9.06836	7.99457092407123e-07	3.52535298475892e-05	5.85063	PG1_GMTP-WT_GMTP
ENSMUSG00000032691.14	Nlrp3	0.630506	4.49198	9.0601	8.07419946675836e-07	3.55344403751044e-05	5.90827	PG1_GMTP-WT_GMTP
ENSMUSG00000021676.10	Iqgap2	0.653202	7.04	9.04905	8.18210405625565e-07	3.59106427782602e-05	5.77448	PG1_GMTP-WT_GMTP
ENSMUSG00000021281.15	Tnfaip2	-0.490689	8.68895	-9.04806	8.19186894372538e-07	3.59106427782602e-05	5.74704	PG1_GMTP-WT_GMTP
ENSMUSG00000060703.12	Cd302	-0.597459	6.27861	-9.04352	8.23662177636273e-07	3.60360277835258e-05	5.78885	PG1_GMTP-WT_GMTP
ENSMUSG00000029135.10	Fosl2	-0.709192	5.0098	-9.03508	8.32074080874158e-07	3.63328159814972e-05	5.83712	PG1_GMTP-WT_GMTP
ENSMUSG00000025498.15	Irf7	0.573173	8.77935	9.0312	8.35963356197761e-07	3.64313483727356e-05	5.72488	PG1_GMTP-WT_GMTP
ENSMUSG00000039899.5	Fgl2	0.588151	7.64351	9.0253	8.41921778366411e-07	3.65616415731957e-05	5.73186	PG1_GMTP-WT_GMTP
ENSMUSG00000020044.13	Timp3	-1.5814	0.839607	-9.02499	8.42230258980082e-07	3.65616415731957e-05	6.23701	PG1_GMTP-WT_GMTP
ENSMUSG00000044703.5	Phf11a	0.785897	3.57776	9.01455	8.52888822540421e-07	3.69524432958144e-05	5.95132	PG1_GMTP-WT_GMTP
ENSMUSG00000034157.12	Cipc	0.452044	7.22166	9.00918	8.58432942347951e-07	3.71205702376159e-05	5.71974	PG1_GMTP-WT_GMTP
ENSMUSG00000020889.11	Nr1d1	1.74047	1.98352	8.99109	8.77369559738067e-07	3.78660483296625e-05	6.122	PG1_GMTP-WT_GMTP
ENSMUSG00000002871.14	Tpra1	0.567819	6.44997	8.97901	8.90267415348118e-07	3.82569972611908e-05	5.70147	PG1_GMTP-WT_GMTP
ENSMUSG00000019132.11	BC005537	0.40251	9.8889	8.97794	8.91423127136677e-07	3.82569972611908e-05	5.65182	PG1_GMTP-WT_GMTP
ENSMUSG00000109715.1	Gm45606	0.713274	2.73351	8.9778	8.91571665657653e-07	3.82569972611908e-05	6.018	PG1_GMTP-WT_GMTP
ENSMUSG00000053175.17	Bcl3	-0.950237	4.49983	-8.95927	9.11785342449785e-07	3.90352977480482e-05	5.78	PG1_GMTP-WT_GMTP
ENSMUSG00000038668.14	Lpar1	-1.88354	-0.376496	-8.95798	9.13208686616822e-07	3.90352977480482e-05	6.12115	PG1_GMTP-WT_GMTP
ENSMUSG00000022014.15	Epsti1	0.459548	6.92021	8.95338	9.18310016440287e-07	3.91783009499658e-05	5.65567	PG1_GMTP-WT_GMTP
ENSMUSG00000024620.11	Pdgfrb	-1.53875	0.573602	-8.94856	9.23689287354235e-07	3.93325936426242e-05	6.15038	PG1_GMTP-WT_GMTP
ENSMUSG00000006398.15	Cdc20	0.984534	3.05857	8.94143	9.3170946812824e-07	3.95985397378008e-05	5.92891	PG1_GMTP-WT_GMTP
ENSMUSG00000008845.9	Cd163	1.73713	0.655526	8.92092	9.55187378085441e-07	4.05191938540313e-05	6.11662	PG1_GMTP-WT_GMTP
ENSMUSG00000035891.16	Cerk	0.397321	8.69158	8.91116	9.66589446801182e-07	4.0925067033159e-05	5.5724	PG1_GMTP-WT_GMTP
ENSMUSG00000041132.11	N4bp2l1	0.54626	5.38683	8.90698	9.71513736353156e-07	4.09946930468297e-05	5.65225	PG1_GMTP-WT_GMTP
ENSMUSG00000020893.17	Per1	0.539251	5.02791	8.90664	9.71908422075601e-07	4.09946930468297e-05	5.67265	PG1_GMTP-WT_GMTP
ENSMUSG00000067591.12	Klra3	1.15832	2.63068	8.90383	9.7523898905353e-07	4.10575614391536e-05	5.93868	PG1_GMTP-WT_GMTP
ENSMUSG00000001741.12	Il16	1.41625	2.77607	8.89499	9.85787015809697e-07	4.14234758639581e-05	5.90855	PG1_GMTP-WT_GMTP
ENSMUSG00000017466.9	Timp2	0.460697	8.87208	8.88762	9.94671279576981e-07	4.17182335736864e-05	5.54067	PG1_GMTP-WT_GMTP
ENSMUSG00000028459.11	Cd72	-0.478588	9.54059	-8.88376	9.99354227814749e-07	4.18360054131904e-05	5.53201	PG1_GMTP-WT_GMTP
ENSMUSG00000026107.11	Nabp1	0.524268	7.04088	8.87129	1.01467223235083e-06	4.23977182030788e-05	5.54754	PG1_GMTP-WT_GMTP
ENSMUSG00000048058.17	Ldlrad3	0.511587	5.13578	8.86847	1.01816629624345e-06	4.24641954543555e-05	5.61712	PG1_GMTP-WT_GMTP
ENSMUSG00000003134.10	Tbc1d8	0.493147	5.59048	8.86253	1.02557459176817e-06	4.26933691532147e-05	5.58519	PG1_GMTP-WT_GMTP
ENSMUSG00000028362.2	Tnfsf8	1.40808	-0.134399	8.85315	1.03737724961713e-06	4.31042803923779e-05	6.01988	PG1_GMTP-WT_GMTP
ENSMUSG00000025648.18	Pfkfb4	0.491068	6.07456	8.85029	1.04100850162049e-06	4.31747633766876e-05	5.54925	PG1_GMTP-WT_GMTP
ENSMUSG00000029174.18	Tbc1d1	0.454952	5.86166	8.84552	1.04710628300867e-06	4.33470918233256e-05	5.55135	PG1_GMTP-WT_GMTP
ENSMUSG00000036256.13	Igfbp7	-1.35107	1.7127	-8.84216	1.05140648724327e-06	4.34445054627022e-05	5.96346	PG1_GMTP-WT_GMTP
ENSMUSG00000068923.14	Syt11	-0.458635	5.53726	-8.8353	1.0602692671451e-06	4.36645400187584e-05	5.55273	PG1_GMTP-WT_GMTP
ENSMUSG00000002105.15	Slc39a13	-0.58744	4.01298	-8.83501	1.06064539462049e-06	4.36645400187584e-05	5.67082	PG1_GMTP-WT_GMTP
ENSMUSG00000053101.3	Gpr141	0.578559	5.66459	8.83159	1.06509230957523e-06	4.3766859490888e-05	5.5419	PG1_GMTP-WT_GMTP
ENSMUSG00000018427.8	Ypel2	0.671611	4.91139	8.81588	1.08578391429939e-06	4.45351038230924e-05	5.56407	PG1_GMTP-WT_GMTP
ENSMUSG00000070873.5	Lilra5	2.57154	0.119905	8.81205	1.09088595421066e-06	4.46622721033071e-05	5.98335	PG1_GMTP-WT_GMTP
ENSMUSG00000037434.7	Slc30a1	0.40794	6.77764	8.80633	1.09857032054205e-06	4.48945046927743e-05	5.4704	PG1_GMTP-WT_GMTP
ENSMUSG00000097354.7	2310001H17Rik	0.771695	3.0331	8.804	1.10171558013286e-06	4.49407307852003e-05	5.75849	PG1_GMTP-WT_GMTP
ENSMUSG00000031402.12	Mpp1	0.367675	8.29309	8.7992	1.10821824707794e-06	4.50834168640547e-05	5.43229	PG1_GMTP-WT_GMTP
ENSMUSG00000031520.6	Vegfc	-2.55208	-1.60373	-8.79844	1.10925450895738e-06	4.50834168640547e-05	5.72747	PG1_GMTP-WT_GMTP
ENSMUSG00000003779.16	Kif20a	1.01513	3.1707	8.78054	1.13391559955843e-06	4.60019250417221e-05	5.70964	PG1_GMTP-WT_GMTP
ENSMUSG00000023349.14	Clec4n	-0.618113	3.66151	-8.76427	1.15682605165963e-06	4.68462063351748e-05	5.6223	PG1_GMTP-WT_GMTP
ENSMUSG00000023015.14	Racgap1	0.639235	4.42787	8.75908	1.1642478618919e-06	4.70382310279457e-05	5.5301	PG1_GMTP-WT_GMTP
ENSMUSG00000032997.16	Chpf	-1.01931	2.54969	-8.75801	1.16578415087411e-06	4.70382310279457e-05	5.76521	PG1_GMTP-WT_GMTP
ENSMUSG00000018217.12	Pmp22	0.432404	8.22149	8.75527	1.16972332006715e-06	4.71119791347623e-05	5.37619	PG1_GMTP-WT_GMTP
ENSMUSG00000024044.19	Epb41l3	0.835435	3.43625	8.73665	1.19687127335744e-06	4.81185382386028e-05	5.61657	PG1_GMTP-WT_GMTP
ENSMUSG00000042292.18	Mrtfa	0.5074	7.07142	8.73477	1.19964905675845e-06	4.81434701500921e-05	5.37023	PG1_GMTP-WT_GMTP
ENSMUSG00000042109.8	Csdc2	5.11618	-4.15704	8.72473	1.21462258269443e-06	4.85976533852804e-05	4.42236	PG1_GMTP-WT_GMTP
ENSMUSG00000020085.15	Aifm2	0.469389	4.74322	8.72426	1.21532248415661e-06	4.85976533852804e-05	5.45787	PG1_GMTP-WT_GMTP
ENSMUSG00000027952.16	Pmvk	-0.771953	3.81908	-8.7216	1.21931814207097e-06	4.86702069839529e-05	5.54778	PG1_GMTP-WT_GMTP
ENSMUSG00000117444.1	Gm50020	1.7308	-0.0265803	8.71482	1.22957763474982e-06	4.89920817217372e-05	5.86304	PG1_GMTP-WT_GMTP
ENSMUSG00000041431.16	Ccnb1	0.765863	3.6114	8.71107	1.23528533216639e-06	4.91132466117584e-05	5.56036	PG1_GMTP-WT_GMTP
ENSMUSG00000026821.16	Ralgds	-1.01226	5.23627	-8.70994	1.23702077693758e-06	4.91132466117584e-05	5.40624	PG1_GMTP-WT_GMTP
ENSMUSG00000031349.4	Nsdhl	-0.710348	4.1648	-8.70696	1.24157872558956e-06	4.92066538260743e-05	5.48889	PG1_GMTP-WT_GMTP
ENSMUSG00000021684.17	Pde8b	1.01682	2.24525	8.70258	1.24833133645081e-06	4.93865551599768e-05	5.73278	PG1_GMTP-WT_GMTP
ENSMUSG00000034855.13	Cxcl10	-1.39895	4.23506	-8.6936	1.26227794059632e-06	4.9849925112435e-05	5.46433	PG1_GMTP-WT_GMTP
ENSMUSG00000078763.2	Slfn1	0.912419	5.23489	8.68975	1.26831645130522e-06	4.99999027879387e-05	5.38004	PG1_GMTP-WT_GMTP
ENSMUSG00000019990.15	Pde7b	0.627884	5.36155	8.68674	1.27304633913498e-06	5.00978535540016e-05	5.36918	PG1_GMTP-WT_GMTP
ENSMUSG00000056234.15	Ncoa4	0.41534	8.70858	8.67794	1.28701118818071e-06	5.05582405666834e-05	5.27009	PG1_GMTP-WT_GMTP
ENSMUSG00000022964.14	Tmem50b	-0.378662	6.61378	-8.672	1.29653377064916e-06	5.08428084789013e-05	5.30035	PG1_GMTP-WT_GMTP
ENSMUSG00000085448.1	Gm13963	1.27112	0.785394	8.65062	1.33140262081238e-06	5.21185731196258e-05	5.78555	PG1_GMTP-WT_GMTP
ENSMUSG00000030795.18	Fus	-0.427516	6.51878	-8.63657	1.35487775615661e-06	5.29338628213318e-05	5.25673	PG1_GMTP-WT_GMTP
ENSMUSG00000041773.8	Enc1	0.689466	5.69147	8.63532	1.35697438864347e-06	5.29338628213318e-05	5.28569	PG1_GMTP-WT_GMTP
ENSMUSG00000042349.13	Ikbke	0.438017	7.00195	8.6336	1.35988659237214e-06	5.29548857514827e-05	5.23966	PG1_GMTP-WT_GMTP
ENSMUSG00000070691.10	Runx3	-1.36291	0.217498	-8.61642	1.38930005762328e-06	5.40060142608854e-05	5.75147	PG1_GMTP-WT_GMTP
ENSMUSG00000024501.20	Dpysl3	-1.74949	-0.171897	-8.60796	1.40402590506862e-06	5.44835304692108e-05	5.72942	PG1_GMTP-WT_GMTP
ENSMUSG00000049871.14	Nlrc3	0.963801	3.25755	8.60107	1.41616020377207e-06	5.48589976159137e-05	5.46613	PG1_GMTP-WT_GMTP
ENSMUSG00000028645.11	Slc2a1	-0.684744	5.134	-8.59692	1.42350560675586e-06	5.50479733163667e-05	5.26477	PG1_GMTP-WT_GMTP
ENSMUSG00000023959.10	Clic5	-1.55251	2.43685	-8.56495	1.48155374032943e-06	5.71211667024619e-05	5.53286	PG1_GMTP-WT_GMTP
ENSMUSG00000040016.16	Ptger3	1.61778	0.591747	8.56458	1.48223706004237e-06	5.71211667024619e-05	5.68536	PG1_GMTP-WT_GMTP
ENSMUSG00000032035.16	Ets1	0.918742	3.67773	8.55893	1.49276716935348e-06	5.74277824996279e-05	5.35384	PG1_GMTP-WT_GMTP
ENSMUSG00000008734.9	Gprc5b	0.607899	4.92275	8.55191	1.50595660429767e-06	5.78354728256348e-05	5.21939	PG1_GMTP-WT_GMTP
ENSMUSG00000028525.16	Pde4b	-0.731957	3.72347	-8.54539	1.51832046087151e-06	5.8210110727536e-05	5.33021	PG1_GMTP-WT_GMTP
ENSMUSG00000042190.12	Cmklr1	0.737677	5.4283	8.53876	1.53099070587687e-06	5.85856488333259e-05	5.17141	PG1_GMTP-WT_GMTP
ENSMUSG00000086150.1	Bach2os	1.52015	0.200364	8.53752	1.533367046953e-06	5.85856488333259e-05	5.65548	PG1_GMTP-WT_GMTP
ENSMUSG00000032489.17	Kif9	0.813043	2.51443	8.52967	1.54856769104589e-06	5.90652835731743e-05	5.47708	PG1_GMTP-WT_GMTP
ENSMUSG00000034488.14	Edil3	-1.45346	0.0168455	-8.52677	1.55420864402916e-06	5.91792789662502e-05	5.63924	PG1_GMTP-WT_GMTP
ENSMUSG00000038578.15	Susd1	0.611943	3.18665	8.51486	1.57763977249653e-06	5.9969124776346e-05	5.36392	PG1_GMTP-WT_GMTP
ENSMUSG00000037278.9	Tmem97	-0.535019	4.5435	-8.51014	1.58703707584989e-06	6.02237385602696e-05	5.19423	PG1_GMTP-WT_GMTP
ENSMUSG00000010751.15	Tnfrsf22	-1.15858	1.85643	-8.50833	1.5906595491604e-06	6.0258720747735e-05	5.52849	PG1_GMTP-WT_GMTP
ENSMUSG00000022667.18	Cd200r1	0.401765	7.22711	8.5046	1.59813340171868e-06	6.04392382924558e-05	5.06419	PG1_GMTP-WT_GMTP
ENSMUSG00000057137.9	Tmem140	0.64321	4.53425	8.4922	1.62327342630704e-06	6.12758352786092e-05	5.17137	PG1_GMTP-WT_GMTP
ENSMUSG00000038886.10	Man2a2	0.639172	7.2045	8.49099	1.62574707502069e-06	6.12758352786092e-05	5.04661	PG1_GMTP-WT_GMTP
ENSMUSG00000037257.8	Aagab	0.499404	6.61116	8.47693	1.6548194505532e-06	6.22664188873416e-05	5.04321	PG1_GMTP-WT_GMTP
ENSMUSG00000026728.9	Vim	-0.48214	11.2418	-8.4739	1.66116505531551e-06	6.23999593926851e-05	4.99736	PG1_GMTP-WT_GMTP
ENSMUSG00000025330.6	Padi4	1.44461	1.29086	8.4663	1.67717574286772e-06	6.28954997489199e-05	5.52621	PG1_GMTP-WT_GMTP
ENSMUSG00000021838.17	Samd4	1.57073	1.36101	8.46286	1.68448751299392e-06	6.30637078480427e-05	5.51637	PG1_GMTP-WT_GMTP
ENSMUSG00000032020.15	Ubash3b	-0.492531	5.94778	-8.4561	1.69891999781548e-06	6.3497490638621e-05	5.03818	PG1_GMTP-WT_GMTP
ENSMUSG00000026807.8	Ak8	0.773309	3.33769	8.45213	1.70746888727e-06	6.37102897686547e-05	5.26007	PG1_GMTP-WT_GMTP
ENSMUSG00000055435.6	Maf	0.479184	7.85815	8.43223	1.75099310410569e-06	6.52252239263944e-05	4.95574	PG1_GMTP-WT_GMTP
ENSMUSG00000038712.16	Mindy1	0.471758	6.5626	8.42739	1.7617777999295e-06	6.55175800830448e-05	4.9786	PG1_GMTP-WT_GMTP
ENSMUSG00000046157.13	Tmem229b	0.407203	6.70415	8.41326	1.79360637924323e-06	6.65902481531682e-05	4.95561	PG1_GMTP-WT_GMTP
ENSMUSG00000036353.13	P2ry12	0.947286	2.1604	8.40727	1.80729477368166e-06	6.69869905069086e-05	5.3633	PG1_GMTP-WT_GMTP
ENSMUSG00000034116.17	Vav1	-0.384853	8.19218	-8.39217	1.84226759239545e-06	6.81700112589051e-05	4.89728	PG1_GMTP-WT_GMTP
ENSMUSG00000058626.16	Capn11	-7.48202	-4.13603	-8.39042	1.84636470364585e-06	6.82085027027315e-05	4.16697	PG1_GMTP-WT_GMTP
ENSMUSG00000050390.12	C77080	0.466203	7.54612	8.37691	1.87835572355542e-06	6.92756219168463e-05	4.88718	PG1_GMTP-WT_GMTP
ENSMUSG00000021508.11	Cxcl14	0.888561	2.43155	8.37033	1.89416391833222e-06	6.97433655276351e-05	5.28039	PG1_GMTP-WT_GMTP
ENSMUSG00000020330.16	Hmmr	0.901364	2.84215	8.36282	1.9123618613275e-06	7.0297413857991e-05	5.21328	PG1_GMTP-WT_GMTP
ENSMUSG00000024277.14	Mapre2	0.431217	7.35183	8.35069	1.94215915189399e-06	7.12753242700833e-05	4.85585	PG1_GMTP-WT_GMTP
ENSMUSG00000002210.11	Smg9	-0.633024	4.92845	-8.34479	1.95683836720068e-06	7.16961157427731e-05	4.94363	PG1_GMTP-WT_GMTP
ENSMUSG00000023066.10	Rttn	0.870209	3.7274	8.33978	1.96936863003923e-06	7.2036921708304e-05	5.05777	PG1_GMTP-WT_GMTP
ENSMUSG00000031389.17	Arhgap4	0.45242	6.51361	8.32676	2.00238476352785e-06	7.31100621923231e-05	4.84515	PG1_GMTP-WT_GMTP
ENSMUSG00000025020.11	Slit1	1.35187	1.32733	8.32564	2.00525962719947e-06	7.31100621923231e-05	5.34319	PG1_GMTP-WT_GMTP
ENSMUSG00000073412.6	Lst1	0.445147	6.09678	8.32001	2.01974179822794e-06	7.35179424859056e-05	4.85015	PG1_GMTP-WT_GMTP
ENSMUSG00000022108.8	Itm2b	0.421164	12.0297	8.31186	2.04091002229161e-06	7.4167467959923e-05	4.78513	PG1_GMTP-WT_GMTP
ENSMUSG00000036641.9	Ccdc148	1.33217	2.10657	8.30458	2.06000564327432e-06	7.473968442013e-05	5.23563	PG1_GMTP-WT_GMTP
ENSMUSG00000055737.12	Ghr	-2.744	-2.44108	-8.29835	2.07650722129544e-06	7.51919326902114e-05	4.94233	PG1_GMTP-WT_GMTP
ENSMUSG00000036438.14	Calm2	0.419181	9.36092	8.29734	2.07921043651057e-06	7.51919326902114e-05	4.75945	PG1_GMTP-WT_GMTP
ENSMUSG00000015542.17	Nat9	0.62472	4.65453	8.2913	2.09536970536258e-06	7.56536961743612e-05	4.8929	PG1_GMTP-WT_GMTP
ENSMUSG00000037126.16	Psd	-1.18165	2.17597	-8.28405	2.1149362999137e-06	7.62367910500392e-05	5.2	PG1_GMTP-WT_GMTP
ENSMUSG00000030770.15	Parva	-1.69688	-0.555082	-8.27262	2.14616385988934e-06	7.7237668073727e-05	5.30292	PG1_GMTP-WT_GMTP
ENSMUSG00000014158.12	Trpv4	0.884159	2.43277	8.26966	2.15433437210184e-06	7.74068644842324e-05	5.14753	PG1_GMTP-WT_GMTP
ENSMUSG00000027843.13	Ptpn22	0.418644	5.70803	8.26177	2.17628409650597e-06	7.80698184008646e-05	4.78756	PG1_GMTP-WT_GMTP
ENSMUSG00000042831.13	Alkbh6	-0.930828	2.92569	-8.25722	2.18906836459371e-06	7.84023794850393e-05	5.06114	PG1_GMTP-WT_GMTP
ENSMUSG00000048216.13	Gpr85	-0.617336	4.128	-8.24987	2.20983260195648e-06	7.90192225119469e-05	4.88857	PG1_GMTP-WT_GMTP
ENSMUSG00000005124.10	Ccn4	-3.19801	-1.43187	-8.24557	2.22211639882493e-06	7.93313331311692e-05	5.15654	PG1_GMTP-WT_GMTP
ENSMUSG00000028082.14	Sh3d19	0.78436	3.51782	8.23682	2.24726930025584e-06	8.01011499945823e-05	4.94793	PG1_GMTP-WT_GMTP
ENSMUSG00000063931.14	Pepd	0.638589	6.23416	8.23239	2.26013486378318e-06	8.04312427680925e-05	4.72674	PG1_GMTP-WT_GMTP
ENSMUSG00000028832.11	Stmn1	0.63938	5.51822	8.22334	2.28664380224092e-06	8.11545903126351e-05	4.74461	PG1_GMTP-WT_GMTP
ENSMUSG00000037071.3	Scd1	-0.837129	3.11431	-8.2226	2.28882616567874e-06	8.11545903126351e-05	4.98723	PG1_GMTP-WT_GMTP
ENSMUSG00000020077.14	Srgn	0.47546	6.50418	8.22174	2.2913723791942e-06	8.11545903126351e-05	4.70335	PG1_GMTP-WT_GMTP
ENSMUSG00000015202.13	Cnksr3	0.628916	3.89027	8.21893	2.29970501952946e-06	8.13206309045338e-05	4.87492	PG1_GMTP-WT_GMTP
ENSMUSG00000021133.9	Susd6	-0.427502	7.99498	-8.20594	2.33858249024006e-06	8.24791142090594e-05	4.64836	PG1_GMTP-WT_GMTP
ENSMUSG00000027187.10	Cat	0.378485	7.97098	8.20551	2.33985924323644e-06	8.24791142090594e-05	4.64815	PG1_GMTP-WT_GMTP
ENSMUSG00000040710.10	St8sia4	0.764454	7.02214	8.17256	2.44172281211153e-06	8.59340080546446e-05	4.622	PG1_GMTP-WT_GMTP
ENSMUSG00000032741.9	Tpcn1	0.522549	7.5902	8.16026	2.48093767182631e-06	8.71766334983629e-05	4.59284	PG1_GMTP-WT_GMTP
ENSMUSG00000028555.15	Ttc39a	1.12026	0.590463	8.15557	2.49608058381209e-06	8.75708271487407e-05	5.17047	PG1_GMTP-WT_GMTP
ENSMUSG00000017754.13	Pltp	0.58579	9.74342	8.14925	2.51661976166239e-06	8.81528049324536e-05	4.55663	PG1_GMTP-WT_GMTP
ENSMUSG00000042284.10	Itga1	-1.32598	0.457586	-8.14527	2.52966023750025e-06	8.84707035726381e-05	5.16215	PG1_GMTP-WT_GMTP
ENSMUSG00000001630.13	Stk38l	-0.752642	3.42848	-8.13981	2.54766801073412e-06	8.89610584092494e-05	4.82965	PG1_GMTP-WT_GMTP
ENSMUSG00000027347.18	Rasgrp1	-2.35194	0.399137	-8.135	2.56363850099116e-06	8.93788529259622e-05	5.15076	PG1_GMTP-WT_GMTP
ENSMUSG00000030397.11	Mark4	-0.425484	5.16939	-8.12144	2.60921103059179e-06	9.08257811631742e-05	4.62511	PG1_GMTP-WT_GMTP
ENSMUSG00000004040.16	Stat3	-0.443191	7.37424	-8.1166	2.62571589830282e-06	9.12579421165589e-05	4.53733	PG1_GMTP-WT_GMTP
ENSMUSG00000081892.2	Gm8864	4.47953	-6.30955	8.11473	2.63209466549943e-06	9.13373690066698e-05	2.89202	PG1_GMTP-WT_GMTP
ENSMUSG00000032915.6	Adgre4	1.19895	2.39648	8.11145	2.64338046526641e-06	9.15865657165985e-05	4.94148	PG1_GMTP-WT_GMTP
ENSMUSG00000037447.16	Arid5a	-0.606228	3.54336	-8.10539	2.6643178227247e-06	9.21688737650484e-05	4.76668	PG1_GMTP-WT_GMTP
ENSMUSG00000074419.11	Gm15448	0.924688	2.8189	8.10099	2.67960845234993e-06	9.25543396242785e-05	4.86683	PG1_GMTP-WT_GMTP
ENSMUSG00000019997.11	Ccn2	-1.24999	1.47548	-8.08244	2.74523017265495e-06	9.46743753360894e-05	5.01199	PG1_GMTP-WT_GMTP
ENSMUSG00000039191.12	Rbpj	-0.604985	6.80474	-8.06891	2.79417119245232e-06	9.62134904586245e-05	4.48549	PG1_GMTP-WT_GMTP
ENSMUSG00000054008.9	Ndst1	0.604073	7.40574	8.06663	2.80250411367171e-06	9.63517323395331e-05	4.46795	PG1_GMTP-WT_GMTP
ENSMUSG00000020818.16	Mfsd11	0.390528	7.42337	8.06412	2.81172492000032e-06	9.65200279076419e-05	4.46412	PG1_GMTP-WT_GMTP
ENSMUSG00000085873.1	Ttc39aos1	1.96995	-0.74304	8.03789	2.9099297440713e-06	9.97377302295896e-05	5.00216	PG1_GMTP-WT_GMTP
ENSMUSG00000043415.5	Otud1	-0.559679	4.45263	-8.02979	2.94098019629912e-06	0.000100647	4.55507	PG1_GMTP-WT_GMTP
ENSMUSG00000030867.7	Plk1	1.06838	2.65014	8.02523	2.95864124144242e-06	0.000101097	4.78895	PG1_GMTP-WT_GMTP
ENSMUSG00000032377.8	Plscr4	0.695275	4.19772	8.02294	2.96752519051906e-06	0.000101245	4.57184	PG1_GMTP-WT_GMTP
ENSMUSG00000020227.10	Irak3	-0.424203	5.05089	-8.01609	2.99432035100728e-06	0.000101912	4.4879	PG1_GMTP-WT_GMTP
ENSMUSG00000036944.6	Tmem71	0.533973	4.6893	8.01562	2.99618854536917e-06	0.000101912	4.51424	PG1_GMTP-WT_GMTP
ENSMUSG00000036817.14	Sun1	-0.419432	4.8863	-8.01117	3.01374125758727e-06	0.000102353	4.49263	PG1_GMTP-WT_GMTP
ENSMUSG00000039735.16	Fnbp1l	-0.663677	6.49803	-8.00512	3.03780783256255e-06	0.000103013	4.40635	PG1_GMTP-WT_GMTP
ENSMUSG00000068036.16	Afdn	-0.52925	6.10318	-7.99525	3.07746807750294e-06	0.0001042	4.40623	PG1_GMTP-WT_GMTP
ENSMUSG00000041992.9	Rapgef5	-0.733838	5.00093	-7.98375	3.12437188681461e-06	0.000105627	4.44649	PG1_GMTP-WT_GMTP
ENSMUSG00000013846.10	St3gal1	-0.518506	7.29061	-7.97878	3.14488454907198e-06	0.00010616	4.34891	PG1_GMTP-WT_GMTP
ENSMUSG00000040430.18	Pitpnc1	0.721718	6.19453	7.97213	3.17259973841681e-06	0.000106934	4.37085	PG1_GMTP-WT_GMTP
ENSMUSG00000039813.14	Tbc1d2	0.664366	4.80368	7.96542	3.20078793454261e-06	0.000107721	4.43537	PG1_GMTP-WT_GMTP
ENSMUSG00000026605.14	Cenpf	1.18129	2.98124	7.9613	3.21821119850387e-06	0.000108144	4.65257	PG1_GMTP-WT_GMTP
ENSMUSG00000026073.13	Il1r2	5.04014	-4.2967	7.95797	3.23239123746167e-06	0.000108343	3.72487	PG1_GMTP-WT_GMTP
ENSMUSG00000094562.5	Trav13-4-dv7	1.11947	1.33734	7.95763	3.23383376678164e-06	0.000108343	4.85923	PG1_GMTP-WT_GMTP
ENSMUSG00000002983.17	Relb	-0.698402	5.22293	-7.95637	3.23919138162314e-06	0.00010836	4.39423	PG1_GMTP-WT_GMTP
ENSMUSG00000020101.14	Vsir	0.398727	9.5309	7.95411	3.24889865845761e-06	0.000108522	4.28775	PG1_GMTP-WT_GMTP
ENSMUSG00000024042.7	Sik1	0.506756	4.79672	7.94083	3.30637389663234e-06	0.000110189	4.40181	PG1_GMTP-WT_GMTP
ENSMUSG00000037406.7	Htra4	1.2391	0.394747	7.9401	3.30955561739001e-06	0.000110189	4.89921	PG1_GMTP-WT_GMTP
ENSMUSG00000068747.14	Sort1	0.503929	6.6457	7.93752	3.32088686387221e-06	0.000110189	4.30799	PG1_GMTP-WT_GMTP
ENSMUSG00000030522.14	Mtmr10	0.43394	5.53468	7.93696	3.32334070941661e-06	0.000110189	4.3502	PG1_GMTP-WT_GMTP
ENSMUSG00000025509.15	Pnpla2	0.503692	7.07873	7.93692	3.32350684769306e-06	0.000110189	4.29556	PG1_GMTP-WT_GMTP
ENSMUSG00000009621.18	Vav2	0.453243	5.96592	7.93566	3.32903196973142e-06	0.000110209	4.32888	PG1_GMTP-WT_GMTP
ENSMUSG00000038963.15	Slco4a1	-2.00856	3.5794	-7.92765	3.36450380934626e-06	0.000111218	4.51791	PG1_GMTP-WT_GMTP
ENSMUSG00000024981.6	Acsl5	-0.374784	6.97017	-7.91853	3.40535129571217e-06	0.000112172	4.27257	PG1_GMTP-WT_GMTP
ENSMUSG00000040855.15	Reps2	0.851405	6.00783	7.91826	3.40659358952663e-06	0.000112172	4.30294	PG1_GMTP-WT_GMTP
ENSMUSG00000026656.15	Fcgr2b	-0.386997	7.34384	-7.91785	3.40842961245872e-06	0.000112172	4.26288	PG1_GMTP-WT_GMTP
ENSMUSG00000014599.10	Csf1	-0.727662	3.35191	-7.91089	3.43999421134303e-06	0.000112891	4.52759	PG1_GMTP-WT_GMTP
ENSMUSG00000017493.12	Igfbp4	0.587745	6.49635	7.9108	3.44040940104551e-06	0.000112891	4.27525	PG1_GMTP-WT_GMTP
ENSMUSG00000020695.14	Mrc2	-2.11824	-0.120513	-7.87805	3.59322990529753e-06	0.000117732	4.82722	PG1_GMTP-WT_GMTP
ENSMUSG00000031799.10	Tpm4	-0.386055	7.33317	-7.85534	3.70342387685793e-06	0.000121165	4.17559	PG1_GMTP-WT_GMTP
ENSMUSG00000037544.14	Dlgap5	0.857598	3.04686	7.84611	3.74922117144457e-06	0.000122445	4.48374	PG1_GMTP-WT_GMTP
ENSMUSG00000103174.1	Gm37168	1.20503	1.86645	7.84525	3.75353419984101e-06	0.000122445	4.65006	PG1_GMTP-WT_GMTP
ENSMUSG00000030161.8	Gabarapl1	0.415965	7.01521	7.8394	3.78289624051454e-06	0.00012319	4.16062	PG1_GMTP-WT_GMTP
ENSMUSG00000030403.9	Vasp	-0.463135	7.49983	-7.83851	3.7873980261821e-06	0.00012319	4.14848	PG1_GMTP-WT_GMTP
ENSMUSG00000072946.12	Ptgr2	0.42653	5.52582	7.83529	3.80370814799511e-06	0.00012354	4.20853	PG1_GMTP-WT_GMTP
ENSMUSG00000026797.16	Stxbp1	-0.586053	5.36549	-7.82806	3.84058573352224e-06	0.000124557	4.20689	PG1_GMTP-WT_GMTP
ENSMUSG00000028763.18	Hspg2	-1.49552	0.875802	-7.82646	3.84875459071612e-06	0.00012464	4.72244	PG1_GMTP-WT_GMTP
ENSMUSG00000035697.14	Arhgap45	0.41524	8.35005	7.82473	3.85768715013293e-06	0.000124749	4.11559	PG1_GMTP-WT_GMTP
ENSMUSG00000024799.16	Tm7sf2	-0.828256	2.90909	-7.81988	3.88272328210301e-06	0.000125377	4.46842	PG1_GMTP-WT_GMTP
ENSMUSG00000038894.7	Irs2	0.678049	4.29078	7.81867	3.88904722492573e-06	0.000125399	4.27805	PG1_GMTP-WT_GMTP
ENSMUSG00000028088.14	Fmo5	0.686647	4.0671	7.8158	3.90395807589386e-06	0.000125698	4.29917	PG1_GMTP-WT_GMTP
ENSMUSG00000030894.5	Tpp1	0.354079	8.57672	7.81171	3.92535806637019e-06	0.000125987	4.09472	PG1_GMTP-WT_GMTP
ENSMUSG00000035914.11	Cd276	-0.929329	2.7406	-7.81156	3.92614754128643e-06	0.000125987	4.4824	PG1_GMTP-WT_GMTP
ENSMUSG00000035385.5	Ccl2	-1.43242	1.34547	-7.81085	3.92985517333906e-06	0.000125987	4.66097	PG1_GMTP-WT_GMTP
ENSMUSG00000005973.6	Rcn1	-0.839384	2.75593	-7.80685	3.95093510727491e-06	0.000126468	4.47355	PG1_GMTP-WT_GMTP
ENSMUSG00000032334.10	Loxl1	-1.50642	0.739659	-7.80585	3.95621383710493e-06	0.000126468	4.70434	PG1_GMTP-WT_GMTP
ENSMUSG00000046080.17	Clec9a	1.74228	0.447335	7.79786	3.99877057660001e-06	0.000127646	4.71005	PG1_GMTP-WT_GMTP
ENSMUSG00000035107.13	Dcbld2	-0.831305	3.98449	-7.79136	4.03367638049931e-06	0.000128392	4.27489	PG1_GMTP-WT_GMTP
ENSMUSG00000017715.11	Pgs1	-0.559235	5.17666	-7.79114	4.03486607140214e-06	0.000128392	4.16605	PG1_GMTP-WT_GMTP
ENSMUSG00000044456.16	Rin3	0.524708	5.87844	7.7903	4.0394032086921e-06	0.000128392	4.12874	PG1_GMTP-WT_GMTP
ENSMUSG00000026482.13	Rgl1	-0.525045	6.08169	-7.78846	4.04939577242758e-06	0.00012842	4.11794	PG1_GMTP-WT_GMTP
ENSMUSG00000086291.1	Gm15513	0.771674	2.79483	7.78802	4.05180650828549e-06	0.00012842	4.44144	PG1_GMTP-WT_GMTP
ENSMUSG00000052102.15	Gnpda1	0.359412	7.57275	7.78515	4.06738426577065e-06	0.000128731	4.07182	PG1_GMTP-WT_GMTP
ENSMUSG00000024600.8	Slc27a6	0.670424	3.21824	7.77892	4.1014880247718e-06	0.000129627	4.36418	PG1_GMTP-WT_GMTP
ENSMUSG00000057522.15	Spop	0.360941	8.01734	7.77771	4.10814995969357e-06	0.000129654	4.05371	PG1_GMTP-WT_GMTP
ENSMUSG00000027435.8	Cd93	0.688858	9.53906	7.77655	4.11453352275893e-06	0.000129672	4.03851	PG1_GMTP-WT_GMTP
ENSMUSG00000005125.13	Ndrg1	0.441924	6.27854	7.77493	4.12348761379855e-06	0.000129771	4.09165	PG1_GMTP-WT_GMTP
ENSMUSG00000039981.6	Zc3h12d	0.509465	6.51168	7.77114	4.14450378662018e-06	0.000130248	4.07856	PG1_GMTP-WT_GMTP
ENSMUSG00000039115.13	Itga9	0.677789	3.85406	7.76689	4.16820193201481e-06	0.000130615	4.25689	PG1_GMTP-WT_GMTP
ENSMUSG00000021880.7	Rnase6	0.837166	3.14402	7.76647	4.17056240303962e-06	0.000130615	4.35819	PG1_GMTP-WT_GMTP
ENSMUSG00000024187.15	Fam234a	0.450386	7.65784	7.7659	4.17374528216404e-06	0.000130615	4.043	PG1_GMTP-WT_GMTP
ENSMUSG00000026809.15	Spaca9	1.29611	1.85381	7.75874	4.2140298865791e-06	0.000131691	4.53312	PG1_GMTP-WT_GMTP
ENSMUSG00000027660.16	Skil	-0.572797	6.55691	-7.75647	4.22689887771198e-06	0.000131909	4.05641	PG1_GMTP-WT_GMTP
ENSMUSG00000032046.15	Abhd12	0.402649	8.60713	7.75477	4.23658839552066e-06	0.000132027	4.01393	PG1_GMTP-WT_GMTP
ENSMUSG00000047798.15	Cd300lf	0.57965	3.51393	7.75239	4.25013754385214e-06	0.000132264	4.28283	PG1_GMTP-WT_GMTP
ENSMUSG00000018983.9	E2f2	0.555385	4.2125	7.74365	4.30040148734826e-06	0.000133642	4.18112	PG1_GMTP-WT_GMTP
ENSMUSG00000053581.13	Zfand2a	0.351991	7.398	7.73503	4.3505550696784e-06	0.000135012	4.00439	PG1_GMTP-WT_GMTP
ENSMUSG00000024140.10	Epas1	0.644635	3.28176	7.72464	4.41179300618156e-06	0.000136723	4.27842	PG1_GMTP-WT_GMTP
ENSMUSG00000060012.9	Kif13b	0.629616	7.22106	7.71883	4.44648678501063e-06	0.000137533	3.98531	PG1_GMTP-WT_GMTP
ENSMUSG00000037411.10	Serpine1	-1.20163	1.58234	-7.7182	4.45027990921638e-06	0.000137533	4.50945	PG1_GMTP-WT_GMTP
ENSMUSG00000046027.17	Stard5	0.432655	5.66723	7.71024	4.4982725057115e-06	0.000138824	4.02494	PG1_GMTP-WT_GMTP
ENSMUSG00000020629.12	Adi1	0.448459	5.41713	7.70701	4.5179328684922e-06	0.000139093	4.03307	PG1_GMTP-WT_GMTP
ENSMUSG00000028793.15	Rnf19b	-0.493108	7.22416	-7.70676	4.51946208252515e-06	0.000139093	3.96808	PG1_GMTP-WT_GMTP
ENSMUSG00000058756.13	Thra	0.567796	3.80784	7.70344	4.53972556628816e-06	0.000139525	4.17359	PG1_GMTP-WT_GMTP
ENSMUSG00000026458.13	Ppfia4	0.501319	5.18211	7.70073	4.55635845173618e-06	0.000139843	4.03785	PG1_GMTP-WT_GMTP
ENSMUSG00000111535.1	Gm35154	1.45524	0.345724	7.69524	4.59023942926855e-06	0.00014069	4.57818	PG1_GMTP-WT_GMTP
ENSMUSG00000024087.4	Cyp1b1	-1.13606	2.07987	-7.69347	4.60127570723422e-06	0.000140834	4.41377	PG1_GMTP-WT_GMTP
ENSMUSG00000078122.4	F630028O10Rik	0.739037	3.66073	7.68979	4.62421437154299e-06	0.000141343	4.17395	PG1_GMTP-WT_GMTP
ENSMUSG00000004552.16	Ctse	0.900401	2.18832	7.68769	4.63734243882808e-06	0.00014155	4.39088	PG1_GMTP-WT_GMTP
ENSMUSG00000006360.11	Crip1	0.469899	7.00436	7.68314	4.6659287482803e-06	0.000142228	3.93975	PG1_GMTP-WT_GMTP
ENSMUSG00000020212.14	Mdm1	0.846424	2.08524	7.68131	4.67747567352098e-06	0.000142385	4.39616	PG1_GMTP-WT_GMTP
ENSMUSG00000076613.4	Ighg2b	4.65753	-6.04719	7.67008	4.74908829227016e-06	0.000144368	2.70111	PG1_GMTP-WT_GMTP
ENSMUSG00000021190.14	Lgmn	0.4258	11.0766	7.66588	4.77616301104018e-06	0.000144994	3.88221	PG1_GMTP-WT_GMTP
ENSMUSG00000020709.15	Adap2	0.521196	6.46527	7.66103	4.80762966344924e-06	0.000145663	3.92369	PG1_GMTP-WT_GMTP
ENSMUSG00000037697.19	Ddhd1	-0.491878	5.68757	-7.66047	4.81126640247672e-06	0.000145663	3.95317	PG1_GMTP-WT_GMTP
ENSMUSG00000074934.3	Grem1	-1.22318	2.01676	-7.65792	4.82795835388207e-06	0.000145971	4.37276	PG1_GMTP-WT_GMTP
ENSMUSG00000032412.8	Atp1b3	-0.4001	8.52667	-7.65428	4.85184100371275e-06	0.000146494	3.87174	PG1_GMTP-WT_GMTP
ENSMUSG00000020250.10	Txnrd1	-0.451818	7.27588	-7.65271	4.86216640807249e-06	0.000146607	3.88988	PG1_GMTP-WT_GMTP
ENSMUSG00000028559.17	Osbpl9	0.353408	7.34918	7.64418	4.91872600316714e-06	0.000148113	3.87605	PG1_GMTP-WT_GMTP
ENSMUSG00000031266.7	Gla	0.333056	8.46194	7.63439	4.98453952160071e-06	0.000149892	3.84399	PG1_GMTP-WT_GMTP
ENSMUSG00000025375.15	Aatk	0.666523	5.09063	7.62979	5.01577376028319e-06	0.000150628	3.94279	PG1_GMTP-WT_GMTP
ENSMUSG00000005667.8	Mthfd2	-0.560785	4.05316	-7.62571	5.0436357496733e-06	0.000151262	4.03238	PG1_GMTP-WT_GMTP
ENSMUSG00000035674.13	Ndufa3	-0.51842	5.0489	-7.61091	5.14614474646639e-06	0.000154129	3.91853	PG1_GMTP-WT_GMTP
ENSMUSG00000050022.16	Amz1	0.439649	6.28077	7.60293	5.20237127126096e-06	0.000155604	3.84675	PG1_GMTP-WT_GMTP
ENSMUSG00000027215.13	Cd82	-0.542101	6.39491	-7.60065	5.21855299428229e-06	0.000155682	3.83961	PG1_GMTP-WT_GMTP
ENSMUSG00000037331.15	Larp1	-0.381492	7.30683	-7.60045	5.2199471606303e-06	0.000155682	3.81435	PG1_GMTP-WT_GMTP
ENSMUSG00000082109.1	Rpl19-ps12	5.12417	-5.53939	7.59873	5.23219832299185e-06	0.000155682	2.86976	PG1_GMTP-WT_GMTP
ENSMUSG00000029177.9	Cenpa	0.756743	4.31777	7.59863	5.23289877748732e-06	0.000155682	3.96368	PG1_GMTP-WT_GMTP
ENSMUSG00000040724.5	Kcna2	1.32682	1.40093	7.59498	5.25901578742986e-06	0.000156251	4.35954	PG1_GMTP-WT_GMTP
ENSMUSG00000023067.14	Cdkn1a	-0.456767	7.0307	-7.58905	5.30165136613563e-06	0.000157308	3.80449	PG1_GMTP-WT_GMTP
ENSMUSG00000032487.8	Ptgs2	-2.97116	1.4323	-7.57996	5.3677716443241e-06	0.000159059	4.33532	PG1_GMTP-WT_GMTP
ENSMUSG00000027765.6	P2ry1	0.613059	3.34511	7.56624	5.46926764292899e-06	0.000161851	4.04478	PG1_GMTP-WT_GMTP
ENSMUSG00000004609.11	Cd33	-0.883489	3.3702	-7.56451	5.48219658453788e-06	0.000162019	4.03851	PG1_GMTP-WT_GMTP
ENSMUSG00000027715.9	Ccna2	0.688467	3.32592	7.54049	5.66528183722952e-06	0.000167104	4.01094	PG1_GMTP-WT_GMTP
ENSMUSG00000035596.14	Mboat7	-0.376456	6.13382	-7.5398	5.67062617148934e-06	0.000167104	3.76134	PG1_GMTP-WT_GMTP
ENSMUSG00000032413.12	Rasa2	-0.765141	3.50026	-7.53902	5.6767191870808e-06	0.000167104	3.98236	PG1_GMTP-WT_GMTP
ENSMUSG00000028678.13	Kif2c	0.924196	2.58785	7.5322	5.72999870327446e-06	0.00016845	4.11376	PG1_GMTP-WT_GMTP
ENSMUSG00000109876.1	Gm45449	1.96565	-0.280669	7.53116	5.73818907399272e-06	0.000168469	4.37359	PG1_GMTP-WT_GMTP
ENSMUSG00000026938.10	Fcna	0.804076	3.01574	7.50883	5.91660025576143e-06	0.000173362	4.01385	PG1_GMTP-WT_GMTP
ENSMUSG00000023050.9	Map3k12	0.498571	4.31058	7.50837	5.92039548238204e-06	0.000173362	3.83493	PG1_GMTP-WT_GMTP
ENSMUSG00000032000.17	Birc3	-0.436565	6.28795	-7.50091	5.98132078822125e-06	0.000174701	3.69954	PG1_GMTP-WT_GMTP
ENSMUSG00000028412.17	Slc44a1	-0.402681	7.12298	-7.50086	5.98180011631902e-06	0.000174701	3.67502	PG1_GMTP-WT_GMTP
ENSMUSG00000055322.16	Tns1	0.575514	5.63405	7.49548	6.02613943981433e-06	0.000175564	3.71878	PG1_GMTP-WT_GMTP
ENSMUSG00000011148.14	Adssl1	0.499069	5.97552	7.49537	6.02707044545027e-06	0.000175564	3.70342	PG1_GMTP-WT_GMTP
ENSMUSG00000027955.16	Gask1b	0.460731	6.51179	7.4905	6.06755010658057e-06	0.000176513	3.67699	PG1_GMTP-WT_GMTP
ENSMUSG00000021759.14	Plpp1	-2.41869	-0.146139	-7.48354	6.12595349858082e-06	0.00017798	4.30928	PG1_GMTP-WT_GMTP
ENSMUSG00000034413.14	Neurl1b	0.707849	2.36573	7.47731	6.17865579392487e-06	0.000179277	4.06943	PG1_GMTP-WT_GMTP
ENSMUSG00000031429.14	Psmd10	-0.47109	5.44056	-7.47548	6.19428888176754e-06	0.000179498	3.69975	PG1_GMTP-WT_GMTP
ENSMUSG00000026558.13	Uck2	-1.55264	1.32095	-7.46947	6.24573519454302e-06	0.000180754	4.19344	PG1_GMTP-WT_GMTP
ENSMUSG00000019876.15	Pkib	0.443587	5.69133	7.46566	6.27860492963888e-06	0.00018147	3.67283	PG1_GMTP-WT_GMTP
ENSMUSG00000032218.7	Ccnb2	1.10142	3.32953	7.46158	6.31404600916114e-06	0.000182258	3.89726	PG1_GMTP-WT_GMTP
ENSMUSG00000039568.6	Ubald1	0.558463	6.30661	7.45642	6.35919261905719e-06	0.000183324	3.63437	PG1_GMTP-WT_GMTP
ENSMUSG00000030717.9	Nupr1	-0.863022	3.47706	-7.45229	6.39546853271471e-06	0.000184132	3.86127	PG1_GMTP-WT_GMTP
ENSMUSG00000049327.17	Kmt5a	-0.453436	6.28655	-7.45078	6.40882172694852e-06	0.000184278	3.62689	PG1_GMTP-WT_GMTP
ENSMUSG00000049866.12	Arl4c	0.356855	7.93973	7.44906	6.42402977636064e-06	0.000184478	3.58357	PG1_GMTP-WT_GMTP
ENSMUSG00000071637.5	Cebpd	-1.26637	3.38328	-7.44806	6.43294386568197e-06	0.000184496	3.86957	PG1_GMTP-WT_GMTP
ENSMUSG00000034205.16	Loxl2	-1.60268	-0.368737	-7.4458	6.45301170887935e-06	0.000184834	4.25987	PG1_GMTP-WT_GMTP
ENSMUSG00000023988.8	Bysl	-0.503494	3.65144	-7.44389	6.47009632441752e-06	0.000185086	3.82396	PG1_GMTP-WT_GMTP
ENSMUSG00000007659.18	Bcl2l1	-0.425643	6.53904	-7.44109	6.49513337152728e-06	0.000185565	3.6044	PG1_GMTP-WT_GMTP
ENSMUSG00000039747.11	Orai2	-0.401287	5.19264	-7.43618	6.5393428982465e-06	0.000186589	3.65717	PG1_GMTP-WT_GMTP
ENSMUSG00000026687.14	Aldh9a1	0.389592	6.56576	7.42727	6.62044154958684e-06	0.000188661	3.58345	PG1_GMTP-WT_GMTP
ENSMUSG00000024030.7	Abcg1	0.355084	9.57558	7.42063	6.68154987949401e-06	0.00019016	3.52706	PG1_GMTP-WT_GMTP
ENSMUSG00000025332.14	Kdm5c	-0.495071	6.84918	-7.40819	6.79759720740807e-06	0.000193216	3.54738	PG1_GMTP-WT_GMTP
ENSMUSG00000027306.15	Nusap1	0.688899	3.03791	7.40694	6.80935008833377e-06	0.000193304	3.86406	PG1_GMTP-WT_GMTP
ENSMUSG00000029581.14	Fscn1	-1.75246	0.818043	-7.40542	6.82370610470785e-06	0.000193466	4.15241	PG1_GMTP-WT_GMTP
ENSMUSG00000020102.15	Slc16a7	0.650351	5.8614	7.40326	6.84413656485545e-06	0.000193799	3.57434	PG1_GMTP-WT_GMTP
ENSMUSG00000022261.6	Sdc2	-1.29291	0.649865	-7.40146	6.86124492385988e-06	0.000193842	4.16032	PG1_GMTP-WT_GMTP
ENSMUSG00000052593.16	Adam17	-0.338247	8.741	-7.40127	6.86304681826018e-06	0.000193842	3.50396	PG1_GMTP-WT_GMTP
ENSMUSG00000027367.16	Stard7	-0.413547	5.24899	-7.39777	6.89649254502084e-06	0.00019454	3.59773	PG1_GMTP-WT_GMTP
ENSMUSG00000022255.16	Mtdh	-0.470245	7.38936	-7.39548	6.91839860245426e-06	0.000194912	3.51564	PG1_GMTP-WT_GMTP
ENSMUSG00000071068.7	Treml2	1.26227	1.82734	7.39432	6.92951117829849e-06	0.000194979	4.02686	PG1_GMTP-WT_GMTP
ENSMUSG00000020838.12	Slc6a4	-1.83726	-0.639496	-7.39315	6.94080631980587e-06	0.000195051	4.18549	PG1_GMTP-WT_GMTP
ENSMUSG00000020652.17	Cenpo	0.463035	3.71433	7.38993	6.97183090972082e-06	0.000195556	3.73699	PG1_GMTP-WT_GMTP
ENSMUSG00000052698.15	Tln2	-1.92903	-0.847581	-7.38947	6.97630213550548e-06	0.000195556	4.17249	PG1_GMTP-WT_GMTP
ENSMUSG00000041324.14	Inhba	-1.8803	0.930887	-7.38372	7.03221537559856e-06	0.000196876	4.11223	PG1_GMTP-WT_GMTP
ENSMUSG00000025150.10	Cbr2	1.32707	1.04586	7.37829	7.08544941641842e-06	0.0001978	4.09381	PG1_GMTP-WT_GMTP
ENSMUSG00000027611.12	Procr	-0.755776	4.70296	-7.37816	7.08676179972505e-06	0.0001978	3.60857	PG1_GMTP-WT_GMTP
ENSMUSG00000004113.18	Cacna1b	0.857289	2.08828	7.37764	7.09182147121894e-06	0.0001978	3.96755	PG1_GMTP-WT_GMTP
ENSMUSG00000029998.14	Pcyox1	0.354288	8.11666	7.37427	7.1251154317236e-06	0.00019848	3.47172	PG1_GMTP-WT_GMTP
ENSMUSG00000047824.13	Pygo2	-0.370174	5.5147	-7.37129	7.15470643922821e-06	0.000199056	3.54424	PG1_GMTP-WT_GMTP
ENSMUSG00000080917.2	Gm15925	2.77208	-1.5044	7.36893	7.17822725398021e-06	0.000199462	4.08882	PG1_GMTP-WT_GMTP
ENSMUSG00000001517.14	Foxm1	0.607864	2.87688	7.36642	7.20326995036491e-06	0.000199857	3.83112	PG1_GMTP-WT_GMTP
ENSMUSG00000029298.15	Gbp9	0.748995	6.5528	7.36572	7.21037276460714e-06	0.000199857	3.49395	PG1_GMTP-WT_GMTP
ENSMUSG00000032265.14	Tent5a	0.465971	7.16863	7.36034	7.26453328383233e-06	0.000201109	3.46921	PG1_GMTP-WT_GMTP
ENSMUSG00000045948.8	Mrps12	-0.668639	3.71079	-7.35615	7.30702376921282e-06	0.000202034	3.68835	PG1_GMTP-WT_GMTP
ENSMUSG00000025743.14	Sdc3	0.416084	10.375	7.34876	7.3825832312354e-06	0.000203871	3.42102	PG1_GMTP-WT_GMTP
ENSMUSG00000024696.9	Lpxn	0.380008	7.47602	7.34477	7.42367593139193e-06	0.000204752	3.43957	PG1_GMTP-WT_GMTP
ENSMUSG00000062585.11	Cnr2	0.363016	5.79245	7.33896	7.48399755725409e-06	0.000206161	3.48339	PG1_GMTP-WT_GMTP
ENSMUSG00000022433.20	Csnk1e	0.41692	5.40378	7.33799	7.49420215410413e-06	0.000206188	3.50138	PG1_GMTP-WT_GMTP
ENSMUSG00000111171.1	Gm47815	1.37769	0.745704	7.32706	7.60924950758831e-06	0.000208729	4.04911	PG1_GMTP-WT_GMTP
ENSMUSG00000034165.16	Ccnd3	-0.553804	5.08951	-7.32674	7.61272342623981e-06	0.000208729	3.50417	PG1_GMTP-WT_GMTP
ENSMUSG00000036587.13	Fut7	0.773447	3.18979	7.32656	7.61463859721579e-06	0.000208729	3.72372	PG1_GMTP-WT_GMTP
ENSMUSG00000031502.11	Col4a1	-1.03607	1.90984	-7.31962	7.68867728267731e-06	0.0002105	3.90918	PG1_GMTP-WT_GMTP
ENSMUSG00000062373.8	Tmem65	0.371676	7.11009	7.3177	7.70935361385199e-06	0.000210807	3.40803	PG1_GMTP-WT_GMTP
ENSMUSG00000026683.14	Nuf2	0.833831	2.55498	7.3111	7.78073029585393e-06	0.000212499	3.802	PG1_GMTP-WT_GMTP
ENSMUSG00000056749.7	Nfil3	-0.694606	3.40961	-7.3036	7.86282521409664e-06	0.000214312	3.65593	PG1_GMTP-WT_GMTP
ENSMUSG00000090125.3	Pou3f1	1.03529	3.22969	7.30328	7.86632898271361e-06	0.000214312	3.68344	PG1_GMTP-WT_GMTP
ENSMUSG00000092009.1	Myh15	2.13178	-0.645992	7.30054	7.89648262734827e-06	0.000214871	4.0621	PG1_GMTP-WT_GMTP
ENSMUSG00000019929.16	Dcn	-1.32195	-0.0039238	-7.28488	8.07145389226594e-06	0.000219365	4.03616	PG1_GMTP-WT_GMTP
ENSMUSG00000049225.14	Pdp1	0.415637	5.77472	7.28389	8.08272562934583e-06	0.000219404	3.40322	PG1_GMTP-WT_GMTP
ENSMUSG00000041729.15	Coro2b	2.0668	-0.643414	7.27856	8.1433406599189e-06	0.000220781	4.03273	PG1_GMTP-WT_GMTP
ENSMUSG00000022114.5	Spry2	-0.60067	2.61715	-7.2689	8.25435181940594e-06	0.000223519	3.73089	PG1_GMTP-WT_GMTP
ENSMUSG00000040584.8	Abcb1a	0.990698	2.46754	7.25236	8.44827792177792e-06	0.000228493	3.73047	PG1_GMTP-WT_GMTP
ENSMUSG00000021384.14	Susd3	0.469762	5.66287	7.24801	8.50000660570888e-06	0.000229613	3.35544	PG1_GMTP-WT_GMTP
ENSMUSG00000030772.6	Dkk3	-1.42992	0.197315	-7.24323	8.55733617763717e-06	0.000230883	3.96969	PG1_GMTP-WT_GMTP
ENSMUSG00000006019.15	Dhx34	-0.461238	5.26168	-7.24203	8.5718116420781e-06	0.000230994	3.36833	PG1_GMTP-WT_GMTP
ENSMUSG00000029923.4	Rab19	0.456374	4.47056	7.24055	8.58969830808041e-06	0.000231197	3.42808	PG1_GMTP-WT_GMTP
ENSMUSG00000032290.7	Ptpn9	-0.373556	5.08669	-7.23833	8.61651571349049e-06	0.000231525	3.37416	PG1_GMTP-WT_GMTP
ENSMUSG00000019850.11	Tnfaip3	-0.407651	5.54636	-7.23782	8.62264727598729e-06	0.000231525	3.3463	PG1_GMTP-WT_GMTP
ENSMUSG00000027737.10	Slc7a11	-1.00051	3.87994	-7.23551	8.65080738533512e-06	0.000232002	3.48885	PG1_GMTP-WT_GMTP
ENSMUSG00000090075.1	Gm16251	5.93724	-5.42461	7.22948	8.72444121541641e-06	0.000233696	2.61162	PG1_GMTP-WT_GMTP
ENSMUSG00000041734.15	Kirrel	-1.24565	-0.225633	-7.22804	8.74211535185182e-06	0.000233888	3.9643	PG1_GMTP-WT_GMTP
ENSMUSG00000034957.10	Cebpa	0.452766	7.98422	7.22569	8.77114426070756e-06	0.000234384	3.25467	PG1_GMTP-WT_GMTP
ENSMUSG00000072949.6	Acot1	0.800919	1.67685	7.22269	8.80832166119415e-06	0.000234924	3.80066	PG1_GMTP-WT_GMTP
ENSMUSG00000024795.11	Kif20b	0.633906	3.70081	7.22236	8.81240077400836e-06	0.000234924	3.49378	PG1_GMTP-WT_GMTP
ENSMUSG00000069607.4	Cd300ld3	0.878088	4.58111	7.21664	8.88371712958791e-06	0.000236542	3.38194	PG1_GMTP-WT_GMTP
ENSMUSG00000042364.11	Snx18	-0.359544	5.9655	-7.21422	8.91401590573246e-06	0.000237066	3.2919	PG1_GMTP-WT_GMTP
ENSMUSG00000058454.15	Dhcr7	-0.402521	5.06025	-7.20368	9.04747062471798e-06	0.000240329	3.32462	PG1_GMTP-WT_GMTP
ENSMUSG00000023367.14	Tmem176a	-0.532051	5.14934	-7.19745	9.12740243403774e-06	0.000242068	3.30944	PG1_GMTP-WT_GMTP
ENSMUSG00000092178.2	Gm45351	-4.53919	-5.29411	-7.19689	9.13464131484653e-06	0.000242068	2.63539	PG1_GMTP-WT_GMTP
ENSMUSG00000001942.8	Siae	0.395693	5.99323	7.19598	9.14642770694305e-06	0.000242093	3.26367	PG1_GMTP-WT_GMTP
ENSMUSG00000036402.13	Gng12	-0.453196	7.03186	-7.18324	9.31244586242831e-06	0.000246174	3.211	PG1_GMTP-WT_GMTP
ENSMUSG00000034641.2	Cd300ld	0.375486	7.84369	7.18247	9.32266596119951e-06	0.000246174	3.19268	PG1_GMTP-WT_GMTP
ENSMUSG00000027173.7	Depdc7	0.628034	2.55974	7.17094	9.47593933919261e-06	0.000249925	3.59703	PG1_GMTP-WT_GMTP
ENSMUSG00000030630.16	Fah	0.910083	1.60321	7.16676	9.53220121107467e-06	0.000251112	3.72933	PG1_GMTP-WT_GMTP
ENSMUSG00000015568.16	Lpl	-0.410644	12.0857	-7.16486	9.55776085502949e-06	0.000251489	3.15733	PG1_GMTP-WT_GMTP
ENSMUSG00000051379.12	Flrt3	-1.29779	0.505738	-7.15425	9.70260864320196e-06	0.000254999	3.82494	PG1_GMTP-WT_GMTP
ENSMUSG00000081666.1	Gm11677	4.32457	-6.47813	7.151	9.74736137764811e-06	0.000255874	2.12586	PG1_GMTP-WT_GMTP
ENSMUSG00000034659.14	Tmem109	-0.352346	6.1327	-7.14562	9.82194931449422e-06	0.000257529	3.18311	PG1_GMTP-WT_GMTP
ENSMUSG00000039616.10	Mocos	0.343608	7.08945	7.14441	9.83887998413272e-06	0.00025767	3.15166	PG1_GMTP-WT_GMTP
ENSMUSG00000040345.10	Arhgap9	0.455502	7.85476	7.14063	9.89182616632189e-06	0.000258586	3.13007	PG1_GMTP-WT_GMTP
ENSMUSG00000058135.12	Gstm1	0.507239	6.88426	7.13986	9.90252508758931e-06	0.000258586	3.15019	PG1_GMTP-WT_GMTP
ENSMUSG00000058056.16	Palld	0.637179	3.48053	7.13943	9.90860400829271e-06	0.000258586	3.40337	PG1_GMTP-WT_GMTP
ENSMUSG00000031805.17	Jak3	-0.475714	5.00757	-7.13688	9.94448081627173e-06	0.000259219	3.22885	PG1_GMTP-WT_GMTP
ENSMUSG00000025932.14	Eya1	-0.538093	4.15376	-7.13581	9.95970472531376e-06	0.000259313	3.30692	PG1_GMTP-WT_GMTP
ENSMUSG00000021200.14	Asb2	1.15274	0.830112	7.13113	1.00260549206621e-05	0.000260736	3.76432	PG1_GMTP-WT_GMTP
ENSMUSG00000027890.17	Gstm4	0.706266	3.37214	7.127	1.00850191484551e-05	0.000261683	3.40193	PG1_GMTP-WT_GMTP
ENSMUSG00000040548.16	Tex2	0.366917	5.8634	7.12694	1.0085932259502e-05	0.000261683	3.16623	PG1_GMTP-WT_GMTP
ENSMUSG00000046949.16	Nqo2	0.420749	5.37935	7.12442	1.01220942272925e-05	0.000262099	3.18668	PG1_GMTP-WT_GMTP
ENSMUSG00000046805.10	Mpeg1	0.331068	12.978	7.12386	1.01301273194884e-05	0.000262099	3.10466	PG1_GMTP-WT_GMTP
ENSMUSG00000025076.11	Casp7	-0.51594	4.73766	-7.12337	1.01372220821994e-05	0.000262099	3.22953	PG1_GMTP-WT_GMTP
ENSMUSG00000060512.7	0610040J01Rik	1.2346	0.672142	7.12035	1.01808392185504e-05	0.000262923	3.76322	PG1_GMTP-WT_GMTP
ENSMUSG00000031101.6	Sash3	0.331446	7.00342	7.11563	1.02493685926995e-05	0.000264273	3.11076	PG1_GMTP-WT_GMTP
ENSMUSG00000000326.13	Comt	0.393409	6.51819	7.11512	1.02568201449889e-05	0.000264273	3.12399	PG1_GMTP-WT_GMTP
ENSMUSG00000021185.16	Dglucy	0.45857	5.29707	7.11241	1.02963595147257e-05	0.000264859	3.17355	PG1_GMTP-WT_GMTP
ENSMUSG00000039774.12	Galnt12	0.524729	3.95906	7.11194	1.0303292498769e-05	0.000264859	3.29552	PG1_GMTP-WT_GMTP
ENSMUSG00000022270.16	Retreg1	0.366791	6.71653	7.10256	1.04417366968575e-05	0.000268109	3.09909	PG1_GMTP-WT_GMTP
ENSMUSG00000072844.6	G530011O06Rik	-0.964828	1.53201	-7.10111	1.04633217614769e-05	0.000268354	3.6431	PG1_GMTP-WT_GMTP
ENSMUSG00000032091.15	Tmprss4	1.68867	-1.87187	7.09668	1.05295447447262e-05	0.000269743	3.69252	PG1_GMTP-WT_GMTP
ENSMUSG00000105741.1	C79130	1.37172	-1.07264	7.09517	1.05521745224182e-05	0.000270012	3.77075	PG1_GMTP-WT_GMTP
ENSMUSG00000020900.15	Myh10	1.08348	1.62824	7.09161	1.06059147275567e-05	0.000270791	3.61694	PG1_GMTP-WT_GMTP
ENSMUSG00000036948.17	Map11	-0.484145	5.9899	-7.09155	1.06068710805248e-05	0.000270791	3.10794	PG1_GMTP-WT_GMTP
ENSMUSG00000063506.14	Arhgap22	0.451473	4.43697	7.08984	1.06327358964319e-05	0.000271141	3.20753	PG1_GMTP-WT_GMTP
ENSMUSG00000097471.8	5830432E09Rik	0.696366	3.18951	7.08477	1.07097763955462e-05	0.000272794	3.36821	PG1_GMTP-WT_GMTP
ENSMUSG00000109036.1	2210406H18Rik	-0.703155	3.2458	-7.08273	1.07410186008767e-05	0.000273277	3.35603	PG1_GMTP-WT_GMTP
ENSMUSG00000024190.7	Dusp1	-0.401316	5.08334	-7.08155	1.07591050633109e-05	0.000273426	3.14099	PG1_GMTP-WT_GMTP
ENSMUSG00000027399.1	Il1a	-1.90363	0.928862	-7.07976	1.07866912130808e-05	0.000273815	3.68095	PG1_GMTP-WT_GMTP
ENSMUSG00000027961.7	Lrrc39	1.38194	0.964389	7.07149	1.09146469317815e-05	0.000276748	3.66545	PG1_GMTP-WT_GMTP
ENSMUSG00000021125.6	Arg2	-1.39065	-0.368897	-7.06751	1.09768766306649e-05	0.00027801	3.74552	PG1_GMTP-WT_GMTP
ENSMUSG00000057193.8	Slc44a2	0.355602	6.69778	7.06408	1.10309187273912e-05	0.000279062	3.04188	PG1_GMTP-WT_GMTP
ENSMUSG00000006281.8	Tep1	0.386609	8.08693	7.0566	1.11493971655451e-05	0.00028174	3.00037	PG1_GMTP-WT_GMTP
ENSMUSG00000037306.13	Man1c1	0.388107	7.77614	7.05536	1.11692615578156e-05	0.000281923	3.00352	PG1_GMTP-WT_GMTP
ENSMUSG00000079523.8	Tmsb10	0.479026	8.50537	7.05048	1.1247355335055e-05	0.000283573	2.98578	PG1_GMTP-WT_GMTP
ENSMUSG00000046456.14	Tmem150b	0.528369	3.8119	7.04832	1.12822875351233e-05	0.000284049	3.22011	PG1_GMTP-WT_GMTP
ENSMUSG00000022419.16	Deptor	0.56976	5.07547	7.04773	1.12916829783454e-05	0.000284049	3.09075	PG1_GMTP-WT_GMTP
ENSMUSG00000001053.15	N4bp3	0.616004	3.06004	7.04296	1.13690507986082e-05	0.000285673	3.32679	PG1_GMTP-WT_GMTP
ENSMUSG00000022346.16	Myc	-0.706925	2.0241	-7.03725	1.14623548611002e-05	0.000287694	3.4825	PG1_GMTP-WT_GMTP
ENSMUSG00000030605.15	Mfge8	0.428144	10.5705	7.02951	1.15902563160083e-05	0.000290577	2.94601	PG1_GMTP-WT_GMTP
ENSMUSG00000035273.14	Hpse	0.330227	7.94676	7.0285	1.16070777317827e-05	0.000290672	2.96017	PG1_GMTP-WT_GMTP
ENSMUSG00000022303.9	Dcstamp	-0.526513	4.72507	-7.01307	1.18667872680031e-05	0.000296586	3.06524	PG1_GMTP-WT_GMTP
ENSMUSG00000037185.9	Krt80	1.68898	0.809665	7.01289	1.18698118976103e-05	0.000296586	3.59628	PG1_GMTP-WT_GMTP
ENSMUSG00000079481.11	Nhsl2	1.3857	1.78219	7.01205	1.18840878844192e-05	0.00029661	3.47966	PG1_GMTP-WT_GMTP
ENSMUSG00000037533.20	Rapgef6	0.688721	6.00396	7.00073	1.20788437738008e-05	0.000301134	2.97065	PG1_GMTP-WT_GMTP
ENSMUSG00000032860.5	P2ry2	-0.52526	4.56864	-6.99868	1.21145433411507e-05	0.000301687	3.05753	PG1_GMTP-WT_GMTP
ENSMUSG00000004707.14	Ly9	0.32608	9.23191	6.99283	1.22169276615663e-05	0.000303898	2.89267	PG1_GMTP-WT_GMTP
ENSMUSG00000031838.8	Ifi30	0.40834	7.45047	6.98736	1.23133635383685e-05	0.000305956	2.90714	PG1_GMTP-WT_GMTP
ENSMUSG00000079414.3	Gm11110	-1.66037	-0.559086	-6.97736	1.24919065561215e-05	0.000310047	3.62236	PG1_GMTP-WT_GMTP
ENSMUSG00000030214.7	Plbd1	0.798338	2.26642	6.97611	1.25144177398993e-05	0.00031026	3.35545	PG1_GMTP-WT_GMTP
ENSMUSG00000027331.15	Knstrn	0.752848	3.49783	6.97102	1.26064618126166e-05	0.000311985	3.14914	PG1_GMTP-WT_GMTP
ENSMUSG00000024770.14	Lipn	0.652754	3.20365	6.97072	1.26119462890498e-05	0.000311985	3.19546	PG1_GMTP-WT_GMTP
ENSMUSG00000030314.16	Atg7	0.338179	6.53149	6.96625	1.26934932328142e-05	0.000313484	2.89925	PG1_GMTP-WT_GMTP
ENSMUSG00000079547.4	H2-DMb1	0.478629	7.31609	6.96585	1.27006575323595e-05	0.000313484	2.87749	PG1_GMTP-WT_GMTP
ENSMUSG00000045328.11	Cenpe	0.743194	4.09709	6.96025	1.28037618513259e-05	0.00031568	3.05055	PG1_GMTP-WT_GMTP
ENSMUSG00000016349.10	Eef1a2	0.954556	3.67585	6.95684	1.28667347613714e-05	0.000316882	3.10148	PG1_GMTP-WT_GMTP
ENSMUSG00000014601.13	Strip1	-0.476985	4.76815	-6.95225	1.2952220366312e-05	0.000318636	2.9696	PG1_GMTP-WT_GMTP
ENSMUSG00000005615.15	Pcyt1a	0.398777	8.13989	6.951	1.29756629016464e-05	0.000318861	2.83989	PG1_GMTP-WT_GMTP
ENSMUSG00000029860.16	Zyx	0.478095	6.70667	6.9485	1.30226567097048e-05	0.000319664	2.86692	PG1_GMTP-WT_GMTP
ENSMUSG00000041064.14	Pif1	1.47334	0.436504	6.94115	1.31615859292927e-05	0.000322506	3.52584	PG1_GMTP-WT_GMTP
ENSMUSG00000055745.4	Rtl6	0.767547	2.75623	6.94085	1.3167348229459e-05	0.000322506	3.22393	PG1_GMTP-WT_GMTP
ENSMUSG00000030677.8	Kif22	0.607358	3.06008	6.93877	1.32069024728183e-05	0.00032312	3.17075	PG1_GMTP-WT_GMTP
ENSMUSG00000020256.14	Aldh1l2	-1.81026	-2.10746	-6.9341	1.32963334003076e-05	0.000324693	3.44798	PG1_GMTP-WT_GMTP
ENSMUSG00000061132.13	Blnk	0.367349	7.45049	6.93389	1.33003084243815e-05	0.000324693	2.82598	PG1_GMTP-WT_GMTP
ENSMUSG00000028646.16	Rragc	0.339035	7.85065	6.92212	1.35286969634164e-05	0.000329908	2.80042	PG1_GMTP-WT_GMTP
ENSMUSG00000022469.17	Rapgef3	0.997544	2.75855	6.92131	1.35446108056691e-05	0.000329935	3.1942	PG1_GMTP-WT_GMTP
ENSMUSG00000066151.12	Fkbp15	0.341546	7.6474	6.91889	1.359211802527e-05	0.000330425	2.79916	PG1_GMTP-WT_GMTP
ENSMUSG00000026031.15	Cflar	-0.560503	7.08138	-6.91878	1.35943112995553e-05	0.000330425	2.8115	PG1_GMTP-WT_GMTP
ENSMUSG00000037847.14	Nmrk1	0.664271	2.87322	6.91767	1.36160930215261e-05	0.000330594	3.1698	PG1_GMTP-WT_GMTP
ENSMUSG00000040690.15	Col16a1	-2.34281	-0.937815	-6.91395	1.36896471017671e-05	0.000332019	3.53036	PG1_GMTP-WT_GMTP
ENSMUSG00000024677.13	Ms4a6b	0.440297	7.54177	6.91092	1.37497916983398e-05	0.000333081	2.78911	PG1_GMTP-WT_GMTP
ENSMUSG00000040857.15	Erf	-0.361645	5.67329	-6.91002	1.37678071786594e-05	0.000333081	2.84775	PG1_GMTP-WT_GMTP
ENSMUSG00000030539.13	Sema4b	-0.571453	3.34916	-6.9095	1.37782506937754e-05	0.000333081	3.07987	PG1_GMTP-WT_GMTP
ENSMUSG00000079049.9	Serpinb1c	1.50088	0.623479	6.90701	1.3828066638118e-05	0.000333924	3.46031	PG1_GMTP-WT_GMTP
ENSMUSG00000052837.7	Junb	-0.644362	7.34416	-6.90283	1.39119181120318e-05	0.000335586	2.78096	PG1_GMTP-WT_GMTP
ENSMUSG00000059743.12	Fdps	-2.07889	-0.522974	-6.89792	1.40114492742434e-05	0.000337621	3.51114	PG1_GMTP-WT_GMTP
ENSMUSG00000032501.9	Trib1	-0.340567	4.46095	-6.89322	1.41071768600649e-05	0.000339561	2.90849	PG1_GMTP-WT_GMTP
ENSMUSG00000038615.17	Nfe2l1	-0.310351	7.9458	-6.88624	1.42508939383206e-05	0.000342651	2.74413	PG1_GMTP-WT_GMTP
ENSMUSG00000024330.17	Col11a2	1.3144	0.841414	6.87878	1.44061221691344e-05	0.000345767	3.39782	PG1_GMTP-WT_GMTP
ENSMUSG00000003228.9	Grk5	0.491054	4.47825	6.87852	1.44114678400938e-05	0.000345767	2.88435	PG1_GMTP-WT_GMTP
ENSMUSG00000000056.7	Narf	0.390568	4.99456	6.87635	1.44571352983417e-05	0.00034649	2.83672	PG1_GMTP-WT_GMTP
ENSMUSG00000005043.13	Sgsh	0.58302	6.13382	6.8683	1.46272225589212e-05	0.00035019	2.7641	PG1_GMTP-WT_GMTP
ENSMUSG00000037523.13	Mavs	0.320637	5.69769	6.86382	1.47228694567531e-05	0.000352102	2.77609	PG1_GMTP-WT_GMTP
ENSMUSG00000029299.14	Abcg3	0.977725	2.40242	6.85743	1.48603140024872e-05	0.000354534	3.15633	PG1_GMTP-WT_GMTP
ENSMUSG00000019874.11	Fabp7	1.14396	1.69529	6.85716	1.48662276544371e-05	0.000354534	3.26206	PG1_GMTP-WT_GMTP
ENSMUSG00000024084.8	Qpct	-0.430812	5.30145	-6.85688	1.48722026020721e-05	0.000354534	2.78685	PG1_GMTP-WT_GMTP
ENSMUSG00000013089.15	Etv5	-0.754272	4.25651	-6.85503	1.4912303633006e-05	0.00035511	2.87217	PG1_GMTP-WT_GMTP
ENSMUSG00000032530.14	Lyzl4	1.342	0.949496	6.85105	1.49990488071527e-05	0.000356795	3.34564	PG1_GMTP-WT_GMTP
ENSMUSG00000002996.17	Hbp1	0.355857	6.32609	6.84931	1.50371875726191e-05	0.000357321	2.72791	PG1_GMTP-WT_GMTP
ENSMUSG00000031442.21	Mcf2l	-0.511326	3.67287	-6.8438	1.51583103207011e-05	0.000359816	2.93054	PG1_GMTP-WT_GMTP
ENSMUSG00000048677.9	Tpcn2	0.368427	6.97474	6.83339	1.53900923477158e-05	0.00036493	2.68364	PG1_GMTP-WT_GMTP
ENSMUSG00000029816.10	Gpnmb	0.348304	14.3924	6.82437	1.55939720201785e-05	0.000369372	2.6665	PG1_GMTP-WT_GMTP
ENSMUSG00000064370.1	mt-Cytb	-0.390499	9.19355	-6.81794	1.57410603839164e-05	0.000372461	2.62601	PG1_GMTP-WT_GMTP
ENSMUSG00000060275.14	Nrg2	2.69542	-1.67796	6.81671	1.57694152729877e-05	0.000372736	3.35133	PG1_GMTP-WT_GMTP
ENSMUSG00000006611.15	Hfe	0.414953	6.25079	6.80703	1.59940547280388e-05	0.000377646	2.66577	PG1_GMTP-WT_GMTP
ENSMUSG00000055069.3	Rab39	0.723205	2.54675	6.80431	1.60577962943411e-05	0.00037875	3.05258	PG1_GMTP-WT_GMTP
ENSMUSG00000024014.8	Pim1	-0.514349	6.26318	-6.80342	1.60788804282551e-05	0.000378847	2.65975	PG1_GMTP-WT_GMTP
ENSMUSG00000004044.9	Cavin1	-0.981759	1.21041	-6.80259	1.60982450407622e-05	0.000378903	3.24388	PG1_GMTP-WT_GMTP
ENSMUSG00000004105.8	Angptl2	0.4382	5.92625	6.79719	1.62259180938013e-05	0.000381506	2.66351	PG1_GMTP-WT_GMTP
ENSMUSG00000037260.8	Hgsnat	-0.322607	8.11131	-6.79506	1.6276755424319e-05	0.000382298	2.60168	PG1_GMTP-WT_GMTP
ENSMUSG00000048285.9	Frmd6	0.560673	4.53831	6.79029	1.63907265317685e-05	0.000384531	2.7433	PG1_GMTP-WT_GMTP
ENSMUSG00000046546.3	Fam43a	1.41528	2.25577	6.78964	1.64062708661544e-05	0.000384531	3.0774	PG1_GMTP-WT_GMTP
ENSMUSG00000067149.6	Jchain	4.90086	-3.48715	6.77517	1.67578343303135e-05	0.000392358	2.8916	PG1_GMTP-WT_GMTP
ENSMUSG00000087187.1	Gm13431	2.0819	-2.38926	6.7724	1.68261005238021e-05	0.000393544	3.1916	PG1_GMTP-WT_GMTP
ENSMUSG00000003882.5	Il7r	0.401183	8.97201	6.76649	1.6972706210104e-05	0.000396557	2.5482	PG1_GMTP-WT_GMTP
ENSMUSG00000030263.13	Lrmp	0.337277	6.54977	6.76213	1.70817317918223e-05	0.000398687	2.58633	PG1_GMTP-WT_GMTP
ENSMUSG00000019838.11	Slc16a10	-0.307482	7.40064	-6.75468	1.72694036281606e-05	0.000402646	2.5522	PG1_GMTP-WT_GMTP
ENSMUSG00000066800.11	Rnasel	0.458676	6.73865	6.7497	1.73962687020505e-05	0.000405181	2.56133	PG1_GMTP-WT_GMTP
ENSMUSG00000026185.8	Igfbp5	-1.76535	-1.35905	-6.74815	1.74360059916407e-05	0.000405647	3.28414	PG1_GMTP-WT_GMTP
ENSMUSG00000012443.4	Kif11	0.746963	4.03989	6.7475	1.74526501149325e-05	0.000405647	2.73337	PG1_GMTP-WT_GMTP
ENSMUSG00000027859.10	Ngf	-4.63231	-4.53784	-6.73984	1.76504010734219e-05	0.000409816	2.47858	PG1_GMTP-WT_GMTP
ENSMUSG00000044583.13	Tlr7	0.526221	8.23215	6.73832	1.76897927952362e-05	0.000410304	2.51236	PG1_GMTP-WT_GMTP
ENSMUSG00000055491.14	Pprc1	-0.412835	4.95875	-6.73696	1.77253151070506e-05	0.000410701	2.62537	PG1_GMTP-WT_GMTP
ENSMUSG00000034522.10	Zfp395	0.433364	5.43375	6.73446	1.7790742807023e-05	0.000411587	2.59087	PG1_GMTP-WT_GMTP
ENSMUSG00000046519.15	Golph3l	0.347547	6.60652	6.73409	1.78004703269866e-05	0.000411587	2.54123	PG1_GMTP-WT_GMTP
ENSMUSG00000006782.16	Cnp	0.339079	6.14776	6.73264	1.78384910809555e-05	0.00041204	2.5549	PG1_GMTP-WT_GMTP
ENSMUSG00000016529.5	Il10	1.29728	1.76707	6.72591	1.80160429240599e-05	0.00041571	3.05478	PG1_GMTP-WT_GMTP
ENSMUSG00000031403.14	Dkc1	-0.52211	3.2775	-6.72474	1.80469969816966e-05	0.000415994	2.80971	PG1_GMTP-WT_GMTP
ENSMUSG00000038332.13	Sesn1	0.403756	7.67607	6.71994	1.81753051970224e-05	0.00041852	2.49284	PG1_GMTP-WT_GMTP
ENSMUSG00000042622.14	Maff	-0.897464	1.35549	-6.71479	1.83136546563092e-05	0.000421271	3.09434	PG1_GMTP-WT_GMTP
ENSMUSG00000024989.15	Cep55	0.769414	2.49303	6.71247	1.83763051080734e-05	0.000422277	2.92175	PG1_GMTP-WT_GMTP
ENSMUSG00000038677.14	Scube3	-1.72183	-0.797273	-6.71111	1.84132233188981e-05	0.00042269	3.24943	PG1_GMTP-WT_GMTP
ENSMUSG00000020176.17	Grb10	-1.94017	-0.931488	-6.70996	1.84446458651088e-05	0.000422976	3.24677	PG1_GMTP-WT_GMTP
ENSMUSG00000084331.1	Gm8163	-3.08253	-7.29063	-6.70661	1.85359722669362e-05	0.000424559	1.48001	PG1_GMTP-WT_GMTP
ENSMUSG00000031570.17	Plpp5	-0.648285	3.22976	-6.70603	1.8551733649081e-05	0.000424559	2.78882	PG1_GMTP-WT_GMTP
ENSMUSG00000027243.8	Harbi1	0.531675	2.7882	6.70422	1.8601323052192e-05	0.000425258	2.8597	PG1_GMTP-WT_GMTP
ENSMUSG00000024335.20	Brd2	-0.285298	8.20102	-6.70266	1.86442113381295e-05	0.000425784	2.45751	PG1_GMTP-WT_GMTP
ENSMUSG00000029385.14	Ccng2	0.33848	5.61703	6.702	1.86625325079711e-05	0.000425784	2.5309	PG1_GMTP-WT_GMTP
ENSMUSG00000043445.7	Pgp	-0.545745	4.97116	-6.70126	1.86828034040163e-05	0.000425811	2.56923	PG1_GMTP-WT_GMTP
ENSMUSG00000081778.1	Gm6325	1.03118	1.13677	6.69799	1.87732105646075e-05	0.000427435	3.09652	PG1_GMTP-WT_GMTP
ENSMUSG00000054766.13	Set	-0.352846	7.22438	-6.69334	1.89027878940435e-05	0.000429947	2.46117	PG1_GMTP-WT_GMTP
ENSMUSG00000035164.8	Zc3h12c	-0.941661	4.11155	-6.69207	1.89381083678753e-05	0.000430312	2.6387	PG1_GMTP-WT_GMTP
ENSMUSG00000022236.10	Ropn1l	0.794462	1.56052	6.69087	1.89717587419298e-05	0.000430638	3.03086	PG1_GMTP-WT_GMTP
ENSMUSG00000054203.7	Ifi205	-1.02633	3.50152	-6.68904	1.90230148757437e-05	0.000431362	2.71884	PG1_GMTP-WT_GMTP
ENSMUSG00000035513.19	Ntng2	-0.799453	1.61619	-6.68394	1.91671546659596e-05	0.00043419	3.01269	PG1_GMTP-WT_GMTP
ENSMUSG00000021127.7	Zfp36l1	0.388461	7.16965	6.68272	1.92017402757544e-05	0.000434532	2.44596	PG1_GMTP-WT_GMTP
ENSMUSG00000024066.9	Xdh	0.399855	8.94881	6.67968	1.92882032293579e-05	0.000436046	2.41378	PG1_GMTP-WT_GMTP
ENSMUSG00000024165.9	Jpt2	-0.361961	5.5443	-6.67761	1.93473004613798e-05	0.00043694	2.49687	PG1_GMTP-WT_GMTP
ENSMUSG00000006740.14	Kif5b	-0.357368	7.32711	-6.67296	1.9480841207821e-05	0.000439511	2.42712	PG1_GMTP-WT_GMTP
ENSMUSG00000029771.12	Irf5	0.32927	8.11124	6.66897	1.95961493780512e-05	0.000441666	2.40639	PG1_GMTP-WT_GMTP
ENSMUSG00000033880.11	Lgals3bp	0.356312	10.4366	6.6666	1.96651489604437e-05	0.000442773	2.38915	PG1_GMTP-WT_GMTP
ENSMUSG00000020092.9	Pald1	-0.966121	2.65589	-6.66537	1.97009389618368e-05	0.000443132	2.82233	PG1_GMTP-WT_GMTP
ENSMUSG00000042608.15	Stk40	-0.404809	4.67549	-6.65969	1.98675766151821e-05	0.00044643	2.52886	PG1_GMTP-WT_GMTP
ENSMUSG00000030189.15	Ybx3	-0.51417	5.45425	-6.65065	2.01354954310867e-05	0.000451995	2.45969	PG1_GMTP-WT_GMTP
ENSMUSG00000028917.14	Plekhm2	0.393396	7.20049	6.64967	2.01646298812167e-05	0.000452194	2.39376	PG1_GMTP-WT_GMTP
ENSMUSG00000024538.8	Ppic	-0.846877	1.45974	-6.64805	2.02132695119772e-05	0.000452686	2.9798	PG1_GMTP-WT_GMTP
ENSMUSG00000022240.10	Ctnnd2	1.70696	-0.773806	6.64759	2.02271173457635e-05	0.000452686	3.15916	PG1_GMTP-WT_GMTP
ENSMUSG00000029552.19	Tes	-0.409619	5.06552	-6.64643	2.02619788422942e-05	0.000453012	2.47739	PG1_GMTP-WT_GMTP
ENSMUSG00000024049.15	Myom1	0.95179	1.48627	6.64281	2.03708631900669e-05	0.00045499	2.96824	PG1_GMTP-WT_GMTP
ENSMUSG00000008398.16	Elk3	-0.369772	5.28865	-6.64106	2.04239810377077e-05	0.00045572	2.45443	PG1_GMTP-WT_GMTP
ENSMUSG00000041842.15	Fhdc1	0.805389	1.57545	6.63963	2.04673923845467e-05	0.00045599	2.95113	PG1_GMTP-WT_GMTP
ENSMUSG00000050106.17	Tmc8	0.836915	1.72952	6.63932	2.04769402565409e-05	0.00045599	2.92878	PG1_GMTP-WT_GMTP
ENSMUSG00000085761.1	4930455G09Rik	0.69822	2.58751	6.63713	2.05433744646209e-05	0.000457013	2.79038	PG1_GMTP-WT_GMTP
ENSMUSG00000054555.11	Adam12	-2.39344	-2.80229	-6.62309	2.09765327593299e-05	0.000466185	2.91516	PG1_GMTP-WT_GMTP
ENSMUSG00000036880.10	Acaa2	0.379837	5.55423	6.61865	2.11155271214379e-05	0.000468807	2.40449	PG1_GMTP-WT_GMTP
ENSMUSG00000045136.6	Tubb2b	-0.925656	1.90254	-6.61429	2.12526778613604e-05	0.000471383	2.86512	PG1_GMTP-WT_GMTP
ENSMUSG00000033031.13	Cip2a	0.66017	3.16511	6.61277	2.13007409307626e-05	0.000471719	2.65563	PG1_GMTP-WT_GMTP
ENSMUSG00000078813.3	Leng1	-0.446688	3.63656	-6.61248	2.13101422159736e-05	0.000471719	2.57991	PG1_GMTP-WT_GMTP
ENSMUSG00000036853.5	Mcoln3	0.401743	6.29856	6.60889	2.14242769289443e-05	0.000473129	2.35672	PG1_GMTP-WT_GMTP
ENSMUSG00000028461.12	Ccdc107	-0.697415	3.77347	-6.60852	2.14361111432176e-05	0.000473129	2.55398	PG1_GMTP-WT_GMTP
ENSMUSG00000023150.14	Ivns1abp	0.345064	6.36928	6.60848	2.14374231197068e-05	0.000473129	2.3536	PG1_GMTP-WT_GMTP
ENSMUSG00000037253.8	Mex3c	-0.366525	5.39353	-6.60455	2.1562995962863e-05	0.00047543	2.39121	PG1_GMTP-WT_GMTP
ENSMUSG00000060183.6	Cxcl11	-3.03693	-0.690191	-6.60309	2.16101910111351e-05	0.000476	3.09462	PG1_GMTP-WT_GMTP
ENSMUSG00000038022.11	Mindy4	1.14531	0.964289	6.59998	2.17104274628576e-05	0.000477736	2.96958	PG1_GMTP-WT_GMTP
ENSMUSG00000053931.11	Cnn3	-1.74999	0.158568	-6.59734	2.17960553892189e-05	0.000479148	3.04528	PG1_GMTP-WT_GMTP
ENSMUSG00000037940.17	Inpp4b	-0.863086	1.64016	-6.59413	2.19003057879665e-05	0.000480966	2.87272	PG1_GMTP-WT_GMTP
ENSMUSG00000024053.11	Emilin2	-0.383905	6.94545	-6.58876	2.20764161131914e-05	0.000483924	2.30499	PG1_GMTP-WT_GMTP
ENSMUSG00000045231.5	BC106179	2.66446	-2.94355	6.58803	2.21006184505144e-05	0.000483924	2.8366	PG1_GMTP-WT_GMTP
ENSMUSG00000076441.9	Ass1	-0.497916	5.94124	-6.58777	2.21090143746514e-05	0.000483924	2.33777	PG1_GMTP-WT_GMTP
ENSMUSG00000028583.14	Pdpn	-0.801969	3.79632	-6.58739	2.21217222910098e-05	0.000483924	2.51787	PG1_GMTP-WT_GMTP
ENSMUSG00000045414.7	Dipk2a	0.444657	5.30397	6.57623	2.24930833821084e-05	0.000491565	2.35221	PG1_GMTP-WT_GMTP
ENSMUSG00000038967.13	Pdk2	0.486839	3.9824	6.57539	2.25212836891676e-05	0.0004917	2.47384	PG1_GMTP-WT_GMTP
ENSMUSG00000002981.10	Clptm1	-0.338571	7.48987	-6.57085	2.26745430206111e-05	0.000494437	2.26393	PG1_GMTP-WT_GMTP
ENSMUSG00000089722.2	Cd300ld5	0.987584	2.05481	6.57036	2.26909454001734e-05	0.000494437	2.77436	PG1_GMTP-WT_GMTP
ENSMUSG00000037820.15	Tgm2	0.459012	5.49606	6.56588	2.28433415541887e-05	0.000497272	2.32497	PG1_GMTP-WT_GMTP
ENSMUSG00000043807.6	Ly6g5b	-4.55872	-4.68228	-6.56489	2.287707821149e-05	0.000497521	2.24936	PG1_GMTP-WT_GMTP
ENSMUSG00000026389.16	Steap3	0.346497	6.93611	6.56233	2.29649748284413e-05	0.000498946	2.26376	PG1_GMTP-WT_GMTP
ENSMUSG00000000149.10	Gna12	0.48943	7.77781	6.56093	2.30129222024587e-05	0.000499501	2.24275	PG1_GMTP-WT_GMTP
ENSMUSG00000023055.10	Calcoco1	0.365579	6.09934	6.5534	2.327366297186e-05	0.00050467	2.27725	PG1_GMTP-WT_GMTP
ENSMUSG00000021054.6	Sgpp1	0.335641	7.12246	6.55142	2.33425540813191e-05	0.000505311	2.24181	PG1_GMTP-WT_GMTP
ENSMUSG00000062646.12	Ganc	0.479422	4.28709	6.55125	2.33485462163391e-05	0.000505311	2.39884	PG1_GMTP-WT_GMTP
ENSMUSG00000072889.9	Nfxl1	0.500734	5.54948	6.54305	2.36369269870437e-05	0.000511057	2.28629	PG1_GMTP-WT_GMTP
ENSMUSG00000033192.5	Lpcat2	-0.45999	5.85089	-6.54021	2.37375491366537e-05	0.000512736	2.26704	PG1_GMTP-WT_GMTP
ENSMUSG00000052563.13	D930048N14Rik	1.01459	1.46342	6.53267	2.40074062085908e-05	0.000518063	2.80345	PG1_GMTP-WT_GMTP
ENSMUSG00000048756.11	Foxo3	0.441357	7.31377	6.53113	2.40629134992622e-05	0.000518404	2.20531	PG1_GMTP-WT_GMTP
ENSMUSG00000027287.14	Snap23	0.295386	7.56196	6.53094	2.40696521544229e-05	0.000518404	2.19965	PG1_GMTP-WT_GMTP
ENSMUSG00000024521.8	Pmaip1	0.475204	4.42552	6.53011	2.40996490714394e-05	0.000518549	2.35066	PG1_GMTP-WT_GMTP
ENSMUSG00000037568.12	Vash2	0.636156	2.62283	6.52697	2.42132057308109e-05	0.000520491	2.61393	PG1_GMTP-WT_GMTP
ENSMUSG00000028751.13	Pla2g2e	1.69811	0.0362934	6.52395	2.43234085164193e-05	0.000522356	2.94562	PG1_GMTP-WT_GMTP
ENSMUSG00000022898.13	Vps26c	0.318241	6.62168	6.52223	2.4385956880575e-05	0.000522906	2.20986	PG1_GMTP-WT_GMTP
ENSMUSG00000009585.18	Apobec3	-0.329118	5.79928	-6.52196	2.43958968003358e-05	0.000522906	2.24071	PG1_GMTP-WT_GMTP
ENSMUSG00000024966.9	Stip1	-0.322995	6.40444	-6.5192	2.44970487482094e-05	0.000524571	2.21221	PG1_GMTP-WT_GMTP
ENSMUSG00000031493.10	Ggn	-3.10173	-0.666621	-6.51534	2.46394948637861e-05	0.000527115	2.96739	PG1_GMTP-WT_GMTP
ENSMUSG00000029640.17	Usp12	0.307139	6.7228	6.50982	2.48445644200706e-05	0.000530993	2.18715	PG1_GMTP-WT_GMTP
ENSMUSG00000037972.7	Snn	-0.672018	3.03146	-6.50908	2.48720523082512e-05	0.000531072	2.51654	PG1_GMTP-WT_GMTP
ENSMUSG00000041313.14	Slc7a1	-0.560831	3.38913	-6.50587	2.4992343623203e-05	0.000533009	2.45208	PG1_GMTP-WT_GMTP
ENSMUSG00000027947.11	Il6ra	0.373924	7.01552	6.50539	2.50105730512189e-05	0.000533009	2.17198	PG1_GMTP-WT_GMTP
ENSMUSG00000041220.10	Elovl6	-0.968291	1.71733	-6.50458	2.50410640066453e-05	0.00053315	2.72407	PG1_GMTP-WT_GMTP
ENSMUSG00000020598.16	Nrcam	2.08856	-0.0976017	6.50284	2.51064361304289e-05	0.000533916	2.92362	PG1_GMTP-WT_GMTP
ENSMUSG00000022797.16	Tfrc	0.436747	6.78695	6.50235	2.51248766585258e-05	0.000533916	2.17348	PG1_GMTP-WT_GMTP
ENSMUSG00000074785.5	Plxnc1	0.442277	8.01759	6.50071	2.51867769127045e-05	0.000534722	2.14383	PG1_GMTP-WT_GMTP
ENSMUSG00000030306.14	Tmtc1	2.65083	-3.22681	6.49938	2.52372150156055e-05	0.000535283	2.65004	PG1_GMTP-WT_GMTP
ENSMUSG00000031924.4	Cyb5b	-0.471886	6.92085	-6.49841	2.52742328570007e-05	0.000535559	2.16348	PG1_GMTP-WT_GMTP
ENSMUSG00000029291.11	Rufy3	0.289751	6.94282	6.49604	2.53645455132546e-05	0.000536963	2.15913	PG1_GMTP-WT_GMTP
ENSMUSG00000110388.1	Gm30329	0.806099	2.76858	6.49178	2.55273434513149e-05	0.000539897	2.53431	PG1_GMTP-WT_GMTP
ENSMUSG00000062203.15	Gspt1	-0.378699	6.36285	-6.49075	2.55669041205984e-05	0.000540222	2.16872	PG1_GMTP-WT_GMTP
ENSMUSG00000029426.8	Scarb2	0.270599	7.86646	6.48926	2.56245091838062e-05	0.000540643	2.12817	PG1_GMTP-WT_GMTP
ENSMUSG00000046245.13	Pilra	-0.428605	4.41842	-6.48898	2.56353047948983e-05	0.000540643	2.28666	PG1_GMTP-WT_GMTP
ENSMUSG00000017652.16	Cd40	-0.937424	3.60714	-6.48725	2.57020306929139e-05	0.000541539	2.38864	PG1_GMTP-WT_GMTP
ENSMUSG00000018395.19	Kif3a	0.334207	5.84018	6.48064	2.59588575069965e-05	0.000546434	2.17358	PG1_GMTP-WT_GMTP
ENSMUSG00000026473.16	Glul	0.323559	8.34219	6.47662	2.61167466192466e-05	0.000549239	2.10116	PG1_GMTP-WT_GMTP
ENSMUSG00000026880.11	Stom	0.295437	8.98584	6.47193	2.63019258658934e-05	0.000552613	2.08729	PG1_GMTP-WT_GMTP
ENSMUSG00000063146.11	Clip2	-0.327825	5.83266	-6.47015	2.63724483803408e-05	0.000553105	2.15733	PG1_GMTP-WT_GMTP
ENSMUSG00000037661.14	Gpr160	0.630705	2.56355	6.47009	2.63749402080444e-05	0.000553105	2.53543	PG1_GMTP-WT_GMTP
ENSMUSG00000025969.15	Nrp2	-0.454914	9.09049	-6.46705	2.64957657317324e-05	0.000555117	2.07881	PG1_GMTP-WT_GMTP
ENSMUSG00000073590.3	3222401L13Rik	1.01291	0.205016	6.45906	2.68170991452543e-05	0.000561323	2.8351	PG1_GMTP-WT_GMTP
ENSMUSG00000048031.15	Fcrl5	-1.16618	0.368487	-6.45432	2.70097497216711e-05	0.000564825	2.8131	PG1_GMTP-WT_GMTP
ENSMUSG00000038085.13	Cnbd2	0.913809	2.05234	6.45049	2.71662314606929e-05	0.000567566	2.5892	PG1_GMTP-WT_GMTP
ENSMUSG00000047554.14	Tmem41b	-0.382276	5.04152	-6.44922	2.7218353783182e-05	0.000568123	2.16932	PG1_GMTP-WT_GMTP
ENSMUSG00000002055.9	Spag5	0.75927	2.53364	6.44783	2.72754222421461e-05	0.000568385	2.50577	PG1_GMTP-WT_GMTP
ENSMUSG00000033952.14	Aspm	1.15751	2.71564	6.44768	2.72818680614675e-05	0.000568385	2.47441	PG1_GMTP-WT_GMTP
ENSMUSG00000086795.1	Gm11579	2.51466	-2.68114	6.44145	2.75396765071442e-05	0.000573221	2.70884	PG1_GMTP-WT_GMTP
ENSMUSG00000024900.5	Cpt1a	0.316702	7.49578	6.44015	2.75940383979821e-05	0.000573817	2.0574	PG1_GMTP-WT_GMTP
ENSMUSG00000044206.3	Vsig4	1.22873	0.957038	6.43883	2.76487572681202e-05	0.00057442	2.72537	PG1_GMTP-WT_GMTP
ENSMUSG00000044786.6	Zfp36	-0.35475	6.60498	-6.43807	2.76808407658957e-05	0.000574551	2.07723	PG1_GMTP-WT_GMTP
ENSMUSG00000018381.15	Abi3	0.477604	3.99512	6.43435	2.78369222510846e-05	0.000577254	2.25049	PG1_GMTP-WT_GMTP
ENSMUSG00000034579.17	Pla2g3	2.53164	-2.67081	6.43229	2.79236647808501e-05	0.000578515	2.69894	PG1_GMTP-WT_GMTP
ENSMUSG00000003484.4	Cyp4f18	1.01332	2.2108	6.42931	2.80497109371214e-05	0.000580587	2.53063	PG1_GMTP-WT_GMTP
ENSMUSG00000022788.16	Fgd4	0.751772	7.84137	6.42834	2.80909524383671e-05	0.000580902	2.032	PG1_GMTP-WT_GMTP
ENSMUSG00000004098.7	Col5a3	-2.77396	-0.534891	-6.42705	2.81458526644173e-05	0.000581499	2.83431	PG1_GMTP-WT_GMTP
ENSMUSG00000036086.16	Zranb3	-0.476379	4.7728	-6.42156	2.83807654036036e-05	0.000585809	2.14619	PG1_GMTP-WT_GMTP
ENSMUSG00000111943.1	Gm47862	1.59757	-0.758967	6.42022	2.84382746384033e-05	0.000586454	2.83073	PG1_GMTP-WT_GMTP
ENSMUSG00000036362.2	P2ry13	0.661106	2.96456	6.40911	2.89206919504417e-05	0.000595852	2.37113	PG1_GMTP-WT_GMTP
ENSMUSG00000040722.7	Scamp5	0.36054	6.43971	6.40752	2.89907576721288e-05	0.000596744	2.03408	PG1_GMTP-WT_GMTP
ENSMUSG00000041939.14	Mvk	-0.572954	3.76467	-6.40595	2.90598787598253e-05	0.000597616	2.23714	PG1_GMTP-WT_GMTP
ENSMUSG00000038780.14	Smurf1	-0.361019	5.60115	-6.40292	2.91937230567048e-05	0.000599815	2.06189	PG1_GMTP-WT_GMTP
ENSMUSG00000026749.11	Nek6	-0.447249	5.27788	-6.39975	2.93342649975939e-05	0.000602149	2.07509	PG1_GMTP-WT_GMTP
ENSMUSG00000098320.1	Vis1	1.21247	-0.0485212	6.39823	2.94018791123818e-05	0.000602982	2.76403	PG1_GMTP-WT_GMTP
ENSMUSG00000022807.9	Osbpl11	0.379596	7.09022	6.39717	2.9449214410239e-05	0.000603398	1.99842	PG1_GMTP-WT_GMTP
ENSMUSG00000018931.3	Natd1	0.370679	5.40011	6.39522	2.95366792523092e-05	0.000604635	2.06056	PG1_GMTP-WT_GMTP
ENSMUSG00000038843.18	Gcnt1	0.426933	6.40062	6.39388	2.95967253431132e-05	0.000604759	2.01369	PG1_GMTP-WT_GMTP
ENSMUSG00000106019.1	Gm43672	0.914241	1.46026	6.39374	2.960289038452e-05	0.000604759	2.58966	PG1_GMTP-WT_GMTP
ENSMUSG00000030109.15	Slc6a12	-0.950094	3.95532	-6.39327	2.96240489722648e-05	0.000604759	2.19054	PG1_GMTP-WT_GMTP
ENSMUSG00000045216.7	Hs6st1	0.420662	5.99837	6.3859	2.99574539335818e-05	0.000611006	2.01631	PG1_GMTP-WT_GMTP
ENSMUSG00000029455.14	Aldh2	0.35046	9.59938	6.38191	3.01393669873601e-05	0.000614155	1.9408	PG1_GMTP-WT_GMTP
ENSMUSG00000031938.15	4931406C07Rik	0.392156	5.64265	6.37832	3.03042567608939e-05	0.000616952	2.02055	PG1_GMTP-WT_GMTP
ENSMUSG00000029553.10	Tfec	-0.466612	4.35944	-6.37605	3.04090138692632e-05	0.000618024	2.11394	PG1_GMTP-WT_GMTP
ENSMUSG00000073555.1	Gm4951	0.532796	3.57672	6.37598	3.04123509276104e-05	0.000618024	2.21756	PG1_GMTP-WT_GMTP
ENSMUSG00000021213.12	Akr1c13	0.328572	4.81613	6.37161	3.06148321084468e-05	0.000621573	2.06314	PG1_GMTP-WT_GMTP
ENSMUSG00000017412.15	Cacnb4	1.00169	0.659604	6.37049	3.06669508505348e-05	0.000621962	2.65531	PG1_GMTP-WT_GMTP
ENSMUSG00000038564.11	Ift172	0.500953	5.40012	6.37	3.06897224501004e-05	0.000621962	2.02038	PG1_GMTP-WT_GMTP
ENSMUSG00000031907.9	Zfp90	0.486682	4.64593	6.35657	3.13234246282149e-05	0.000634228	2.05422	PG1_GMTP-WT_GMTP
ENSMUSG00000110631.1	Gm42047	0.400663	4.78223	6.35439	3.14278417471864e-05	0.000635766	2.03848	PG1_GMTP-WT_GMTP
ENSMUSG00000035354.9	Uvrag	0.3226	6.36143	6.35245	3.15208117733998e-05	0.000637069	1.9489	PG1_GMTP-WT_GMTP
ENSMUSG00000087484.1	2900089D17Rik	0.967609	1.21704	6.34879	3.1697152078109e-05	0.000640053	2.55333	PG1_GMTP-WT_GMTP
ENSMUSG00000026827.12	Gpd2	-0.520484	4.61285	-6.34542	3.18602217541354e-05	0.000642764	2.03942	PG1_GMTP-WT_GMTP
ENSMUSG00000050271.12	Prag1	-0.88602	2.53659	-6.33998	3.21254324873856e-05	0.000647529	2.33568	PG1_GMTP-WT_GMTP
ENSMUSG00000073125.10	Xlr3b	-1.28987	0.420625	-6.33577	3.23321379682199e-05	0.000651107	2.62771	PG1_GMTP-WT_GMTP
ENSMUSG00000071172.13	Srsf3	-0.34374	6.41877	-6.33459	3.2390622201718e-05	0.000651697	1.91835	PG1_GMTP-WT_GMTP
ENSMUSG00000036478.8	Btg1	-0.383116	7.99681	-6.33398	3.24205746451304e-05	0.000651712	1.87881	PG1_GMTP-WT_GMTP
ENSMUSG00000053398.11	Phgdh	-1.39456	1.06811	-6.33224	3.25070595972848e-05	0.000652862	2.54713	PG1_GMTP-WT_GMTP
ENSMUSG00000056145.5	AI504432	-0.949434	1.83697	-6.32857	3.26893892869197e-05	0.000655734	2.43231	PG1_GMTP-WT_GMTP
ENSMUSG00000021756.12	Il6st	0.567833	8.19606	6.32818	3.27088228032913e-05	0.000655734	1.86656	PG1_GMTP-WT_GMTP
ENSMUSG00000048120.16	Entpd1	0.33407	7.84957	6.31999	3.31207592768443e-05	0.000663396	1.85879	PG1_GMTP-WT_GMTP
ENSMUSG00000031756.5	Cenpn	0.674477	1.49314	6.31377	3.34369214687489e-05	0.000669128	2.46036	PG1_GMTP-WT_GMTP
ENSMUSG00000020397.15	Med7	-0.36854	3.72959	-6.31222	3.35163174841311e-05	0.000669648	2.093	PG1_GMTP-WT_GMTP
ENSMUSG00000003528.15	Slc25a1	-0.358796	6.1144	-6.31209	3.35229331434614e-05	0.000669648	1.89347	PG1_GMTP-WT_GMTP
ENSMUSG00000020538.15	Srebf1	-0.424359	6.40527	-6.30792	3.37375133840757e-05	0.000673332	1.87604	PG1_GMTP-WT_GMTP
ENSMUSG00000071669.14	Snx29	0.625853	4.96243	6.30728	3.37703996954787e-05	0.000673386	1.9489	PG1_GMTP-WT_GMTP
ENSMUSG00000035004.3	Igsf6	-0.28162	8.47056	-6.30641	3.38153013655744e-05	0.000673679	1.82808	PG1_GMTP-WT_GMTP
ENSMUSG00000024013.15	Fgd2	0.472852	5.95368	6.30272	3.40068785294136e-05	0.000676892	1.88513	PG1_GMTP-WT_GMTP
ENSMUSG00000037664.13	Cdkn1c	0.665903	4.94259	6.29158	3.45914362305649e-05	0.000687913	1.92526	PG1_GMTP-WT_GMTP
ENSMUSG00000031383.8	Dusp9	0.771037	2.09465	6.28819	3.47716047401256e-05	0.000690881	2.32791	PG1_GMTP-WT_GMTP
ENSMUSG00000022848.8	Slc49a4	0.38165	5.20716	6.28568	3.49057668511658e-05	0.000692526	1.89712	PG1_GMTP-WT_GMTP
ENSMUSG00000022432.7	Smc1b	2.49129	-2.29766	6.28548	3.49164971122719e-05	0.000692526	2.56259	PG1_GMTP-WT_GMTP
ENSMUSG00000051969.7	Tlr11	2.16311	-1.37473	6.28106	3.5153747759062e-05	0.000696612	2.62636	PG1_GMTP-WT_GMTP
ENSMUSG00000036718.17	Micall2	-0.510527	4.12807	-6.27932	3.524769733353e-05	0.000697854	1.98638	PG1_GMTP-WT_GMTP
ENSMUSG00000015665.8	Awat1	1.90642	-0.722106	6.27734	3.53546452625248e-05	0.000698744	2.61924	PG1_GMTP-WT_GMTP
ENSMUSG00000020681.14	Ace	1.17875	-0.474069	6.27733	3.53552535783395e-05	0.000698744	2.60911	PG1_GMTP-WT_GMTP
ENSMUSG00000030144.4	Clec4d	-0.378177	7.93929	-6.27573	3.54421933279469e-05	0.000699842	1.78615	PG1_GMTP-WT_GMTP
ENSMUSG00000037628.10	Cdkn3	0.896598	1.0494	6.27094	3.57036002272062e-05	0.000704381	2.45423	PG1_GMTP-WT_GMTP
ENSMUSG00000000753.15	Serpinf1	-1.46547	0.0230858	-6.26816	3.58561578799279e-05	0.000706765	2.56159	PG1_GMTP-WT_GMTP
ENSMUSG00000073000.3	Gm10451	-1.47014	-0.455455	-6.26576	3.59885689223923e-05	0.000708222	2.59079	PG1_GMTP-WT_GMTP
ENSMUSG00000093388.1	Gm22655	1.74682	-0.342624	6.26567	3.59935425612212e-05	0.000708222	2.58432	PG1_GMTP-WT_GMTP
ENSMUSG00000026110.15	Mgat4a	-0.429624	5.26404	-6.25858	3.63872716249982e-05	0.000715338	1.84994	PG1_GMTP-WT_GMTP
ENSMUSG00000059479.7	B3gnt8	0.40337	5.6157	6.25723	3.64628676822297e-05	0.000716194	1.82784	PG1_GMTP-WT_GMTP
ENSMUSG00000023087.15	Noct	-0.763383	2.75198	-6.25108	3.68092257018393e-05	0.000722361	2.15721	PG1_GMTP-WT_GMTP
ENSMUSG00000022092.11	Ppp3cc	-0.611463	2.33346	-6.24994	3.68738092201442e-05	0.000722992	2.22765	PG1_GMTP-WT_GMTP
ENSMUSG00000047281.3	Sfn	-0.803567	1.89778	-6.24767	3.70027035458441e-05	0.000724883	2.29534	PG1_GMTP-WT_GMTP
ENSMUSG00000026504.17	Sdccag8	0.326894	5.28356	6.24497	3.71561818465663e-05	0.000727251	1.82684	PG1_GMTP-WT_GMTP
ENSMUSG00000043157.8	Arl11	0.332406	7.41659	6.24346	3.72426653966219e-05	0.000728305	1.74407	PG1_GMTP-WT_GMTP
ENSMUSG00000037762.6	Slc16a9	1.07658	0.706513	6.23459	3.77547622047028e-05	0.000737673	2.44015	PG1_GMTP-WT_GMTP
ENSMUSG00000028108.15	Ecm1	0.447704	6.65388	6.23303	3.78454937430174e-05	0.000738798	1.74728	PG1_GMTP-WT_GMTP
ENSMUSG00000112023.1	Lilr4b	-0.364723	8.37447	-6.22852	3.81088755813417e-05	0.00074329	1.7037	PG1_GMTP-WT_GMTP
ENSMUSG00000041671.13	Pyroxd1	0.508375	2.5933	6.22715	3.81894809124556e-05	0.000743643	2.14659	PG1_GMTP-WT_GMTP
ENSMUSG00000045664.5	Cdc42ep2	-1.07951	2.08677	-6.22708	3.81936648478694e-05	0.000743643	2.23239	PG1_GMTP-WT_GMTP
ENSMUSG00000026385.16	Dbi	-0.436184	6.11091	-6.22335	3.84140526851043e-05	0.000747282	1.75068	PG1_GMTP-WT_GMTP
ENSMUSG00000038807.19	Rap1gap2	1.00955	1.44923	6.20382	3.95886513321283e-05	0.000769196	2.29395	PG1_GMTP-WT_GMTP
ENSMUSG00000017309.11	Cd300lg	1.57507	-0.0564773	6.20347	3.96094789709308e-05	0.000769196	2.4694	PG1_GMTP-WT_GMTP
ENSMUSG00000038235.4	F11r	-0.730202	1.25708	-6.20221	3.96870294248685e-05	0.000770032	2.31869	PG1_GMTP-WT_GMTP
ENSMUSG00000024781.16	Lipa	0.2997	11.1825	6.20088	3.97681348691562e-05	0.000770935	1.65127	PG1_GMTP-WT_GMTP
ENSMUSG00000034203.8	Chchd4	-0.365534	3.77898	-6.19616	4.00593246314031e-05	0.000775906	1.89975	PG1_GMTP-WT_GMTP
ENSMUSG00000030516.14	Tjp1	-1.28217	-0.786465	-6.19244	4.02901447485051e-05	0.0007797	2.4947	PG1_GMTP-WT_GMTP
ENSMUSG00000042647.13	Acad12	0.483661	4.57302	6.19009	4.04365419854209e-05	0.000781229	1.79349	PG1_GMTP-WT_GMTP
ENSMUSG00000101059.1	Gm4017	4.79769	-5.71377	6.19005	4.04392080665695e-05	0.000781229	1.5387	PG1_GMTP-WT_GMTP
ENSMUSG00000116234.1	Gm49550	4.63184	-5.5925	6.18228	4.092776008309e-05	0.000789984	1.5679	PG1_GMTP-WT_GMTP
ENSMUSG00000048249.14	Crebrf	0.526009	6.4738	6.18028	4.1054851679703e-05	0.000791552	1.66766	PG1_GMTP-WT_GMTP
ENSMUSG00000086564.9	Cd101	0.501385	2.32264	6.17988	4.10799774943937e-05	0.000791552	2.11781	PG1_GMTP-WT_GMTP
ENSMUSG00000070390.12	Nlrp1b	0.696951	4.03364	6.17552	4.13580658740861e-05	0.000796223	1.83146	PG1_GMTP-WT_GMTP
ENSMUSG00000025137.15	Pcyt2	-0.496242	4.94036	-6.1733	4.1500414891922e-05	0.000798275	1.73462	PG1_GMTP-WT_GMTP
ENSMUSG00000028439.14	Fam219a	0.364943	5.5998	6.16884	4.17877511879554e-05	0.000803109	1.68574	PG1_GMTP-WT_GMTP
ENSMUSG00000021298.8	Gpr132	-0.44832	4.24423	-6.16383	4.21133701056654e-05	0.000808671	1.78643	PG1_GMTP-WT_GMTP
ENSMUSG00000032946.16	Rasgrp2	1.08505	1.00284	6.16126	4.22815148712022e-05	0.000811138	2.28853	PG1_GMTP-WT_GMTP
ENSMUSG00000025279.7	Dnase1l3	0.658457	1.46981	6.16021	4.2350301050907e-05	0.000811138	2.22195	PG1_GMTP-WT_GMTP
ENSMUSG00000105703.2	Gm43305	0.920579	2.16656	6.1602	4.23509218616714e-05	0.000811138	2.11256	PG1_GMTP-WT_GMTP
ENSMUSG00000048142.9	Nat8l	0.885369	2.7201	6.15908	4.242461960388e-05	0.000811508	2.01546	PG1_GMTP-WT_GMTP
ENSMUSG00000026229.17	Psmd1	-0.284397	6.85392	-6.1588	4.24429590231703e-05	0.000811508	1.621	PG1_GMTP-WT_GMTP
ENSMUSG00000052459.13	Atp6v1a	0.288038	10.1279	6.15338	4.28013654327315e-05	0.00081766	1.57141	PG1_GMTP-WT_GMTP
ENSMUSG00000042105.18	Inpp5f	0.39621	5.31528	6.15206	4.28888268692492e-05	0.00081863	1.67452	PG1_GMTP-WT_GMTP
ENSMUSG00000062345.10	Serpinb2	-3.75389	-0.984434	-6.15119	4.29466820592372e-05	0.000819034	2.43785	PG1_GMTP-WT_GMTP
ENSMUSG00000019943.10	Atp2b1	0.378996	8.87794	6.14758	4.3187656343084e-05	0.000822926	1.56709	PG1_GMTP-WT_GMTP
ENSMUSG00000036545.9	Adamts2	-1.23741	0.244276	-6.1455	4.33273720334743e-05	0.000824884	2.35248	PG1_GMTP-WT_GMTP
ENSMUSG00000000275.16	Trim25	0.306863	8.53996	6.14397	4.34301670392838e-05	0.000826136	1.56451	PG1_GMTP-WT_GMTP
ENSMUSG00000029484.12	Anxa3	0.3039	6.91601	6.142	4.35635343744537e-05	0.000827967	1.59189	PG1_GMTP-WT_GMTP
ENSMUSG00000022425.16	Enpp2	-0.979868	0.863137	-6.14079	4.36451839052441e-05	0.000828813	2.27427	PG1_GMTP-WT_GMTP
ENSMUSG00000000409.14	Lck	-2.28434	-1.88987	-6.14009	4.36923898571314e-05	0.000829004	2.39943	PG1_GMTP-WT_GMTP
ENSMUSG00000017607.9	Tns4	0.97838	1.58848	6.13915	4.3756422129862e-05	0.000829513	2.17083	PG1_GMTP-WT_GMTP
ENSMUSG00000003382.18	Etv3	-0.307365	7.64081	-6.13738	4.38769912976074e-05	0.000831093	1.56733	PG1_GMTP-WT_GMTP
ENSMUSG00000116380.1	Gm39556	1.70263	-0.445906	6.13613	4.39620594154074e-05	0.000831998	2.39425	PG1_GMTP-WT_GMTP
ENSMUSG00000029070.9	Mxra8	-1.24334	0.00654653	-6.13286	4.41860284428626e-05	0.000835528	2.35547	PG1_GMTP-WT_GMTP
ENSMUSG00000071076.6	Jund	-0.493204	5.51749	-6.12256	4.48991128799542e-05	0.000848293	1.61487	PG1_GMTP-WT_GMTP
ENSMUSG00000039691.10	Tspan10	1.11565	0.739069	6.12052	4.50415871543524e-05	0.000850265	2.25794	PG1_GMTP-WT_GMTP
ENSMUSG00000037995.15	Igsf9	-0.57913	2.7312	-6.11522	4.54142237849539e-05	0.000856574	1.94286	PG1_GMTP-WT_GMTP
ENSMUSG00000028163.17	Nfkb1	-0.266509	6.99739	-6.11032	4.57620174733681e-05	0.000861785	1.53802	PG1_GMTP-WT_GMTP
ENSMUSG00000022090.10	Pdlim2	0.452628	4.45372	6.11024	4.57677479225255e-05	0.000861785	1.67612	PG1_GMTP-WT_GMTP
ENSMUSG00000017707.9	Serinc3	0.277658	9.64165	6.10551	4.61058364538838e-05	0.00086742	1.49413	PG1_GMTP-WT_GMTP
ENSMUSG00000004296.14	Il12b	-5.73188	-2.38464	-6.09753	4.66823615652703e-05	0.000877526	2.29292	PG1_GMTP-WT_GMTP
ENSMUSG00000026519.16	Tmem63a	-0.32981	4.95924	-6.09554	4.68273062896745e-05	0.00087951	1.60664	PG1_GMTP-WT_GMTP
ENSMUSG00000037580.10	Gch1	-0.579816	5.04695	-6.08788	4.73898600803598e-05	0.000889327	1.58771	PG1_GMTP-WT_GMTP
ENSMUSG00000025007.13	Aldh18a1	-0.430971	2.97019	-6.08229	4.78054973718218e-05	0.000896373	1.84762	PG1_GMTP-WT_GMTP
ENSMUSG00000036769.14	Wdr44	0.408887	4.71934	6.07939	4.80222487991147e-05	0.000899681	1.59999	PG1_GMTP-WT_GMTP
ENSMUSG00000028019.9	Pdgfc	0.483497	3.37307	6.0769	4.82088355898628e-05	0.000901911	1.76977	PG1_GMTP-WT_GMTP
ENSMUSG00000024397.14	Aif1	0.327964	7.03152	6.07673	4.82220869324855e-05	0.000901911	1.48221	PG1_GMTP-WT_GMTP
ENSMUSG00000038014.7	Fam120a	0.269765	8.42121	6.07555	4.83110955480524e-05	0.000902819	1.45409	PG1_GMTP-WT_GMTP
ENSMUSG00000078945.10	Naip2	0.397951	6.98567	6.06431	4.91666115086344e-05	0.000918037	1.46305	PG1_GMTP-WT_GMTP
ENSMUSG00000113010.1	Gm34084	0.951638	1.46128	6.06107	4.94157196538249e-05	0.000921917	2.06534	PG1_GMTP-WT_GMTP
ENSMUSG00000100486.7	Gm4131	2.01475	-2.28057	6.05862	4.96059632709988e-05	0.000924693	2.25026	PG1_GMTP-WT_GMTP
ENSMUSG00000026490.18	Cdc42bpa	-0.997811	1.58615	-6.05568	4.98340635598134e-05	0.00092817	2.03788	PG1_GMTP-WT_GMTP
ENSMUSG00000025730.14	Rab40c	0.334941	5.03917	6.05473	4.99080408251851e-05	0.000928772	1.53402	PG1_GMTP-WT_GMTP
ENSMUSG00000033082.10	Clec1a	1.27841	1.76515	6.05279	5.00599401648535e-05	0.000930823	2.00544	PG1_GMTP-WT_GMTP
ENSMUSG00000003283.15	Hck	-0.365594	7.47138	-6.05027	5.0257750973872e-05	0.000933723	1.42836	PG1_GMTP-WT_GMTP
ENSMUSG00000011257.19	Pabpc4	-0.387537	5.24844	-6.04733	5.04893564446116e-05	0.000937245	1.50761	PG1_GMTP-WT_GMTP
ENSMUSG00000027233.4	Patl2	3.21689	-2.52812	6.044	5.07531477962677e-05	0.000941359	2.20043	PG1_GMTP-WT_GMTP
ENSMUSG00000024812.11	Tjp2	-0.405311	4.66928	-6.04064	5.10210127102539e-05	0.000945541	1.5412	PG1_GMTP-WT_GMTP
ENSMUSG00000027797.15	Dclk1	-1.21232	-0.636631	-6.03945	5.11162983687317e-05	0.000945559	2.25737	PG1_GMTP-WT_GMTP
ENSMUSG00000102918.1	Pcdhgc3	-1.20582	-0.151612	-6.03905	5.11480933769155e-05	0.000945559	2.22395	PG1_GMTP-WT_GMTP
ENSMUSG00000020178.6	Adora2a	-2.00226	0.503856	-6.03898	5.11540826334459e-05	0.000945559	2.15767	PG1_GMTP-WT_GMTP
ENSMUSG00000025068.8	Gsto1	0.336572	6.18715	6.03792	5.12391745084272e-05	0.000945559	1.44563	PG1_GMTP-WT_GMTP
ENSMUSG00000039050.8	Osbpl2	0.306898	5.42462	6.03784	5.12455815667326e-05	0.000945559	1.48143	PG1_GMTP-WT_GMTP
ENSMUSG00000031826.20	Usp10	-0.366781	4.17626	-6.03746	5.12762241180074e-05	0.000945559	1.58859	PG1_GMTP-WT_GMTP
ENSMUSG00000039943.16	Plcb4	-0.711939	1.43705	-6.03641	5.13602170471436e-05	0.000946326	2.02947	PG1_GMTP-WT_GMTP
ENSMUSG00000022665.15	Ccdc80	-0.976801	0.047285	-6.03586	5.14045862263753e-05	0.000946362	2.20122	PG1_GMTP-WT_GMTP
ENSMUSG00000032243.8	Itga11	-3.51295	-1.85814	-6.0341	5.15461880199153e-05	0.00094761	2.24922	PG1_GMTP-WT_GMTP
ENSMUSG00000026893.4	Gca	-0.552282	2.914	-6.03397	5.15573495415825e-05	0.00094761	1.77899	PG1_GMTP-WT_GMTP
ENSMUSG00000032332.17	Col12a1	-1.68842	1.78689	-6.03129	5.17737627980431e-05	0.000950805	1.96745	PG1_GMTP-WT_GMTP
ENSMUSG00000098557.1	Kctd12	0.386236	8.97278	6.02918	5.19454953911049e-05	0.000953174	1.37255	PG1_GMTP-WT_GMTP
ENSMUSG00000019088.14	Dnase1l1	0.301866	7.89874	6.02828	5.20186620714102e-05	0.000953732	1.38405	PG1_GMTP-WT_GMTP
ENSMUSG00000017802.14	Retreg3	0.269955	6.8102	6.026	5.22053117255401e-05	0.000956369	1.40509	PG1_GMTP-WT_GMTP
ENSMUSG00000044201.10	Cdc25c	1.01232	-0.00723344	6.01066	5.34770028313621e-05	0.000978862	2.167	PG1_GMTP-WT_GMTP
ENSMUSG00000018906.14	P4ha2	-0.850626	1.59826	-6.00602	5.38685525664742e-05	0.000985221	1.95623	PG1_GMTP-WT_GMTP
ENSMUSG00000014547.10	Wdfy2	0.49444	6.85631	5.99614	5.4711405077598e-05	0.000999448	1.35461	PG1_GMTP-WT_GMTP
ENSMUSG00000019188.16	H13	-0.315814	6.71426	-5.99585	5.47360634218185e-05	0.000999448	1.35829	PG1_GMTP-WT_GMTP
ENSMUSG00000024664.5	Fads3	-0.844159	1.50356	-5.98928	5.53045093039994e-05	0.00100851	1.94372	PG1_GMTP-WT_GMTP
ENSMUSG00000028229.11	Rmdn1	0.578713	3.22563	5.98907	5.53228957633337e-05	0.00100851	1.6513	PG1_GMTP-WT_GMTP
ENSMUSG00000043953.12	Ccrl2	-0.42763	5.19186	-5.97976	5.61398941403536e-05	0.00102257	1.40023	PG1_GMTP-WT_GMTP
ENSMUSG00000016087.13	Fli1	0.343533	6.54972	5.97895	5.62109314232171e-05	0.00102303	1.3356	PG1_GMTP-WT_GMTP
ENSMUSG00000020393.16	Kremen1	-0.323943	5.0953	-5.97836	5.62638533802754e-05	0.00102316	1.40462	PG1_GMTP-WT_GMTP
ENSMUSG00000031530.6	Dusp4	-0.653531	4.61868	-5.97283	5.6755592377034e-05	0.00103126	1.43441	PG1_GMTP-WT_GMTP
ENSMUSG00000069516.8	Lyz2	-0.351376	14.0389	-5.97118	5.69035297712e-05	0.00103311	1.30355	PG1_GMTP-WT_GMTP
ENSMUSG00000021892.14	Sh3bp5	0.323187	6.14586	5.96699	5.72807106030333e-05	0.00103911	1.3304	PG1_GMTP-WT_GMTP
ENSMUSG00000036533.9	Cdc42ep3	0.549596	3.75442	5.95986	5.79278753707091e-05	0.00105	1.51824	PG1_GMTP-WT_GMTP
ENSMUSG00000055538.7	Zcchc24	0.429818	4.8251	5.95828	5.80730346661387e-05	0.00105177	1.39191	PG1_GMTP-WT_GMTP
ENSMUSG00000030711.16	Sult1a1	0.894353	1.97896	5.95672	5.82153179234445e-05	0.00105274	1.81573	PG1_GMTP-WT_GMTP
ENSMUSG00000040618.7	Pck2	0.432569	4.93305	5.95636	5.82490552713426e-05	0.00105274	1.38021	PG1_GMTP-WT_GMTP
ENSMUSG00000018930.3	Ccl4	-0.538874	4.05653	-5.95608	5.82749518363854e-05	0.00105274	1.47014	PG1_GMTP-WT_GMTP
ENSMUSG00000108574.1	Gm44981	1.75102	-2.58805	5.95564	5.83153862156528e-05	0.00105274	2.06983	PG1_GMTP-WT_GMTP
ENSMUSG00000005802.12	Slc30a4	-0.572871	3.63312	-5.95486	5.83869044118388e-05	0.00105318	1.52823	PG1_GMTP-WT_GMTP
ENSMUSG00000017132.17	Cyth1	0.283579	5.99256	5.95071	5.87705340350883e-05	0.00105925	1.30982	PG1_GMTP-WT_GMTP
ENSMUSG00000061024.8	Rrs1	-0.443385	4.48096	-5.9465	5.9162394764343e-05	0.00106545	1.40476	PG1_GMTP-WT_GMTP
ENSMUSG00000031930.11	Wwp2	0.317063	6.69092	5.94544	5.9261937656698e-05	0.00106638	1.27574	PG1_GMTP-WT_GMTP
ENSMUSG00000033318.7	Gstt2	0.561898	2.53311	5.9423	5.95560754482451e-05	0.00107081	1.69694	PG1_GMTP-WT_GMTP
ENSMUSG00000055866.9	Per2	1.12647	1.76502	5.9411	5.96694795915529e-05	0.00107198	1.82507	PG1_GMTP-WT_GMTP
ENSMUSG00000031133.12	Arhgef6	0.427697	7.31059	5.93691	6.00657547499737e-05	0.00107824	1.24501	PG1_GMTP-WT_GMTP
ENSMUSG00000112095.1	A130077B15Rik	0.452383	2.63964	5.9352	6.02284976715383e-05	0.00108029	1.66623	PG1_GMTP-WT_GMTP
ENSMUSG00000024736.15	Tmem132a	-0.464002	5.16277	-5.93398	6.03446653454773e-05	0.0010815	1.32662	PG1_GMTP-WT_GMTP
ENSMUSG00000046997.5	Spsb4	-0.575555	3.06657	-5.93303	6.04355572831156e-05	0.00108226	1.58695	PG1_GMTP-WT_GMTP
ENSMUSG00000032440.13	Tgfbr2	0.326975	7.64179	5.93091	6.06383148463962e-05	0.00108502	1.22792	PG1_GMTP-WT_GMTP
ENSMUSG00000055826.5	Tescl	6.95913	-4.36925	5.92944	6.07789502861266e-05	0.00108667	1.63062	PG1_GMTP-WT_GMTP
ENSMUSG00000024778.13	Fas	-0.847371	2.61232	-5.9263	6.10817117788543e-05	0.00109121	1.65653	PG1_GMTP-WT_GMTP
ENSMUSG00000091243.2	Vgll3	-1.55205	-1.06063	-5.92277	6.14238863865228e-05	0.00109596	2.09563	PG1_GMTP-WT_GMTP
ENSMUSG00000066441.14	Rdh11	-0.373812	5.21705	-5.92254	6.14459042501976e-05	0.00109596	1.304	PG1_GMTP-WT_GMTP
ENSMUSG00000002332.16	Dhrs1	0.314831	6.51429	5.92086	6.1609911297043e-05	0.001098	1.24066	PG1_GMTP-WT_GMTP
ENSMUSG00000020260.9	Pofut2	-0.332296	5.62621	-5.91807	6.18831263540366e-05	0.00110199	1.27291	PG1_GMTP-WT_GMTP
ENSMUSG00000002668.8	Dennd1c	0.361958	5.21811	5.91551	6.21335799328683e-05	0.00110557	1.29228	PG1_GMTP-WT_GMTP
ENSMUSG00000033581.17	Igf2bp2	-0.425494	5.6081	-5.91256	6.24245137578164e-05	0.00110986	1.26475	PG1_GMTP-WT_GMTP
ENSMUSG00000026365.15	Cfh	0.419653	4.76574	5.90923	6.27553225826444e-05	0.00111486	1.3158	PG1_GMTP-WT_GMTP
ENSMUSG00000022967.13	Ifnar1	-0.317644	7.29876	-5.9065	6.30268987345658e-05	0.00111879	1.19485	PG1_GMTP-WT_GMTP
ENSMUSG00000071379.2	Hpcal1	0.413887	7.25866	5.90505	6.31722006503483e-05	0.00112048	1.19338	PG1_GMTP-WT_GMTP
ENSMUSG00000032477.14	Cdc25a	-0.376183	3.8929	-5.89586	6.40997983092755e-05	0.00113603	1.39262	PG1_GMTP-WT_GMTP
ENSMUSG00000025745.12	Hadha	0.248383	7.44691	5.89153	6.45417691567949e-05	0.00114295	1.16658	PG1_GMTP-WT_GMTP
ENSMUSG00000054455.5	Vapb	0.280665	7.87725	5.88788	6.49164596131918e-05	0.00114868	1.15214	PG1_GMTP-WT_GMTP
ENSMUSG00000032842.13	Abcc10	0.519456	2.52673	5.88045	6.56868145893188e-05	0.00116139	1.59665	PG1_GMTP-WT_GMTP
ENSMUSG00000092349.1	Smim40	0.895486	0.773064	5.87878	6.58614860934796e-05	0.00116355	1.86922	PG1_GMTP-WT_GMTP
ENSMUSG00000063193.9	Cd300lb	0.274192	8.3542	5.87755	6.59904861485268e-05	0.00116434	1.12785	PG1_GMTP-WT_GMTP
ENSMUSG00000001707.8	Eef1e1	-0.480772	3.85547	-5.87736	6.60102239268871e-05	0.00116434	1.36735	PG1_GMTP-WT_GMTP
ENSMUSG00000006403.13	Adamts4	-3.39057	-2.76894	-5.87113	6.66663620526666e-05	0.00117498	1.92696	PG1_GMTP-WT_GMTP
ENSMUSG00000026622.15	Nek2	0.783663	2.54995	5.86952	6.68377488829068e-05	0.00117687	1.57449	PG1_GMTP-WT_GMTP
ENSMUSG00000051615.14	Rap2a	0.280874	7.52414	5.86913	6.68790985212312e-05	0.00117687	1.12767	PG1_GMTP-WT_GMTP
ENSMUSG00000038497.7	Tmco3	-0.264988	5.71125	-5.86108	6.77404095443508e-05	0.00119109	1.17394	PG1_GMTP-WT_GMTP
ENSMUSG00000035373.2	Ccl7	-1.25342	-0.435491	-5.85301	6.86168403565398e-05	0.00120555	1.9564	PG1_GMTP-WT_GMTP
ENSMUSG00000030315.15	Vgll4	0.363908	5.07366	5.85094	6.88434833441202e-05	0.00120858	1.19496	PG1_GMTP-WT_GMTP
ENSMUSG00000041930.7	Fam222a	1.4538	0.444719	5.84352	6.96620920797528e-05	0.00122145	1.85388	PG1_GMTP-WT_GMTP
ENSMUSG00000022758.14	P2rx6	1.44513	-1.12946	5.8433	6.96860337364593e-05	0.00122145	1.97614	PG1_GMTP-WT_GMTP
ENSMUSG00000024097.11	Srsf7	-0.370521	5.1076	-5.83596	7.05065669386655e-05	0.00123486	1.16762	PG1_GMTP-WT_GMTP
ENSMUSG00000014496.8	Ankrd28	-0.530338	5.24856	-5.83269	7.08745076795673e-05	0.00124033	1.15256	PG1_GMTP-WT_GMTP
ENSMUSG00000019763.11	Rmnd1	0.473026	3.78925	5.8297	7.12141028369537e-05	0.0012453	1.29783	PG1_GMTP-WT_GMTP
ENSMUSG00000030036.8	Mogs	-0.47725	5.15043	-5.82667	7.15587305772799e-05	0.00125034	1.14912	PG1_GMTP-WT_GMTP
ENSMUSG00000028937.14	Acot7	-0.475939	4.64669	-5.82345	7.19277667480105e-05	0.00125581	1.1841	PG1_GMTP-WT_GMTP
ENSMUSG00000011008.13	Mcoln2	-0.384158	5.92847	-5.82043	7.22748844570165e-05	0.00126088	1.09595	PG1_GMTP-WT_GMTP
ENSMUSG00000021277.16	Traf3	-0.399581	5.30351	-5.81733	7.2634689426373e-05	0.00126593	1.12355	PG1_GMTP-WT_GMTP
ENSMUSG00000000184.12	Ccnd2	-1.11101	1.10153	-5.81696	7.26776518937186e-05	0.00126593	1.72408	PG1_GMTP-WT_GMTP
ENSMUSG00000035852.11	Misp	0.97273	1.03239	5.81437	7.29782483701299e-05	0.00127017	1.72973	PG1_GMTP-WT_GMTP
ENSMUSG00000050737.13	Ptges	-1.20827	2.1548	-5.8122	7.32323818059613e-05	0.0012736	1.54951	PG1_GMTP-WT_GMTP
ENSMUSG00000037752.4	Xkr8	-0.558809	3.30492	-5.81096	7.33769755246202e-05	0.00127456	1.34381	PG1_GMTP-WT_GMTP
ENSMUSG00000032577.16	Mapkapk3	0.277025	6.35806	5.8106	7.34199416535196e-05	0.00127456	1.06238	PG1_GMTP-WT_GMTP
ENSMUSG00000024404.7	Riok3	-0.289473	7.05432	-5.81027	7.34584724762826e-05	0.00127456	1.04042	PG1_GMTP-WT_GMTP
ENSMUSG00000028680.14	Plk3	-0.6454	1.59679	-5.80225	7.44060300368449e-05	0.00128999	1.62536	PG1_GMTP-WT_GMTP
ENSMUSG00000036528.16	Ppfibp2	0.344182	5.4044	5.79995	7.46804488421026e-05	0.00129375	1.08835	PG1_GMTP-WT_GMTP
ENSMUSG00000064215.13	Ifi27	-0.577148	5.19934	-5.79845	7.48597724770584e-05	0.00129585	1.09857	PG1_GMTP-WT_GMTP
ENSMUSG00000040957.15	Cables1	0.940945	-0.584593	5.79661	7.50806856331387e-05	0.0012982	1.87861	PG1_GMTP-WT_GMTP
ENSMUSG00000027832.5	Ptx3	-2.13528	-2.3663	-5.79635	7.51120495280601e-05	0.0012982	1.86866	PG1_GMTP-WT_GMTP
ENSMUSG00000029204.7	Rhoh	0.484733	3.95455	5.79549	7.5214616184656e-05	0.00129897	1.21728	PG1_GMTP-WT_GMTP
ENSMUSG00000037936.15	Scarb1	-0.271419	6.90094	-5.79153	7.56930584212206e-05	0.00130622	1.01318	PG1_GMTP-WT_GMTP
ENSMUSG00000022051.15	Bnip3l	0.278815	7.48221	5.7885	7.60612637653788e-05	0.00131156	0.993765	PG1_GMTP-WT_GMTP
ENSMUSG00000024570.7	Rbfa	0.36464	4.64053	5.78287	7.67503935096678e-05	0.00132242	1.11684	PG1_GMTP-WT_GMTP
ENSMUSG00000019944.14	Rhobtb1	0.896761	3.15477	5.78129	7.69447590881534e-05	0.00132386	1.3206	PG1_GMTP-WT_GMTP
ENSMUSG00000109324.2	Prmt1	-0.313939	5.16738	-5.78123	7.69526731332117e-05	0.00132386	1.07192	PG1_GMTP-WT_GMTP
ENSMUSG00000086111.1	Gm15326	1.12777	1.01446	5.77913	7.72117503823009e-05	0.00132729	1.67494	PG1_GMTP-WT_GMTP
ENSMUSG00000034110.8	Kctd7	-0.407765	3.20168	-5.77846	7.72950313325877e-05	0.0013277	1.30761	PG1_GMTP-WT_GMTP
ENSMUSG00000030054.4	Gp9	4.12697	-5.69276	5.77479	7.77509986592838e-05	0.00133373	1.1099	PG1_GMTP-WT_GMTP
ENSMUSG00000068566.12	Myadm	-0.255425	7.48143	-5.77421	7.78230413135749e-05	0.00133373	0.969798	PG1_GMTP-WT_GMTP
ENSMUSG00000020409.10	Slu7	0.267468	6.53355	5.77406	7.78418340546905e-05	0.00133373	0.99508	PG1_GMTP-WT_GMTP
ENSMUSG00000039853.18	Trim14	0.350307	6.09877	5.77348	7.79147057523088e-05	0.00133373	1.01005	PG1_GMTP-WT_GMTP
ENSMUSG00000048163.13	Selplg	0.368077	8.27646	5.77323	7.79451456823178e-05	0.00133373	0.954369	PG1_GMTP-WT_GMTP
ENSMUSG00000049643.15	2310022A10Rik	0.322151	6.77217	5.7698	7.83753243804798e-05	0.00134007	0.980412	PG1_GMTP-WT_GMTP
ENSMUSG00000030766.15	Arhgap17	0.304764	7.58027	5.76842	7.8548618705051e-05	0.001342	0.957984	PG1_GMTP-WT_GMTP
ENSMUSG00000005813.12	Metap1	-0.331832	5.11549	-5.76304	7.92306289448247e-05	0.00135262	1.04505	PG1_GMTP-WT_GMTP
ENSMUSG00000026548.4	Slamf9	-0.258749	6.27603	-5.76213	7.93456608055235e-05	0.00135355	0.984113	PG1_GMTP-WT_GMTP
ENSMUSG00000027133.3	Nop10	-0.371965	4.50312	-5.76011	7.96029787438301e-05	0.0013569	1.09226	PG1_GMTP-WT_GMTP
ENSMUSG00000038026.12	Kcnj9	1.59603	-0.255846	5.75678	8.0029821653847e-05	0.00136313	1.78984	PG1_GMTP-WT_GMTP
ENSMUSG00000068551.12	Zfp467	0.345078	4.72251	5.75611	8.01164576564543e-05	0.00136357	1.06438	PG1_GMTP-WT_GMTP
ENSMUSG00000006014.16	Prg4	-1.56826	-1.82875	-5.75398	8.03909689688641e-05	0.0013672	1.83875	PG1_GMTP-WT_GMTP
ENSMUSG00000022951.16	Rcan1	-0.303646	4.86979	-5.75187	8.06644628636271e-05	0.0013708	1.04472	PG1_GMTP-WT_GMTP
ENSMUSG00000070942.8	Il1rl2	-0.618505	2.4395	-5.74718	8.1273723412381e-05	0.00138011	1.39195	PG1_GMTP-WT_GMTP
ENSMUSG00000044952.5	Kctd21	0.337781	4.83286	5.74458	8.1614791898813e-05	0.00138484	1.03541	PG1_GMTP-WT_GMTP
ENSMUSG00000034610.14	Tut4	0.452603	6.10999	5.74162	8.20034421048662e-05	0.00139038	0.956062	PG1_GMTP-WT_GMTP
ENSMUSG00000058486.11	Wdr91	0.274341	7.67762	5.7411	8.20725339338445e-05	0.0013905	0.910107	PG1_GMTP-WT_GMTP
ENSMUSG00000087150.7	BC064078	1.21764	1.11652	5.73861	8.24013846731488e-05	0.00139501	1.59406	PG1_GMTP-WT_GMTP
ENSMUSG00000038412.8	Higd1a	-0.418147	3.80539	-5.73802	8.24798180591994e-05	0.00139528	1.14236	PG1_GMTP-WT_GMTP
ENSMUSG00000027544.16	Nfatc2	0.69884	5.79995	5.73149	8.3351301296137e-05	0.00140895	0.952636	PG1_GMTP-WT_GMTP
ENSMUSG00000006526.13	Stimate	-0.458915	3.26027	-5.72509	8.42137462115538e-05	0.00142245	1.20818	PG1_GMTP-WT_GMTP
ENSMUSG00000064065.15	Ipcef1	0.802483	1.98703	5.72246	8.45711357916538e-05	0.00142741	1.42987	PG1_GMTP-WT_GMTP
ENSMUSG00000052353.13	Cemip	-1.68164	-0.676889	-5.72191	8.46458870844596e-05	0.00142759	1.7674	PG1_GMTP-WT_GMTP
ENSMUSG00000070469.12	Adamtsl3	-3.88128	-6.14041	-5.72038	8.48549553452534e-05	0.00143004	0.93191	PG1_GMTP-WT_GMTP
ENSMUSG00000051048.17	P4ha3	-3.174	-2.98469	-5.71792	8.51921554832041e-05	0.00143464	1.68088	PG1_GMTP-WT_GMTP
ENSMUSG00000020715.9	Ern1	0.428705	6.22811	5.71668	8.53628802041251e-05	0.00143643	0.909461	PG1_GMTP-WT_GMTP
ENSMUSG00000071714.7	Csf2rb2	0.263314	9.4795	5.71401	8.57306577343275e-05	0.001441	0.844336	PG1_GMTP-WT_GMTP
ENSMUSG00000042500.11	Ago4	0.417173	5.3402	5.71377	8.57638446297281e-05	0.001441	0.947519	PG1_GMTP-WT_GMTP
ENSMUSG00000032633.12	Flcn	0.403677	6.74244	5.70771	8.66059697485337e-05	0.0014534	0.876773	PG1_GMTP-WT_GMTP
ENSMUSG00000044350.14	Lacc1	-0.242583	7.11841	-5.7071	8.6690786220399e-05	0.0014534	0.86533	PG1_GMTP-WT_GMTP
ENSMUSG00000025980.14	Hspd1	-0.323357	6.85256	-5.70706	8.66972009655938e-05	0.0014534	0.872463	PG1_GMTP-WT_GMTP
ENSMUSG00000034252.14	Senp6	-0.296024	5.39022	-5.70384	8.71485509563856e-05	0.00145987	0.927704	PG1_GMTP-WT_GMTP
ENSMUSG00000018583.5	G3bp1	-0.321775	6.62577	-5.70124	8.7514572925655e-05	0.0014649	0.869527	PG1_GMTP-WT_GMTP
ENSMUSG00000014543.14	Klra17	1.47319	-0.0181211	5.70076	8.75825596758139e-05	0.00146494	1.67708	PG1_GMTP-WT_GMTP
ENSMUSG00000038893.12	Fam117a	0.501763	3.72252	5.69562	8.83117980106827e-05	0.00147576	1.0832	PG1_GMTP-WT_GMTP
ENSMUSG00000017716.15	Birc5	0.693873	2.80757	5.69527	8.83616770221159e-05	0.00147576	1.23878	PG1_GMTP-WT_GMTP
ENSMUSG00000006442.10	Srm	-0.479489	3.39478	-5.69335	8.86363462839195e-05	0.00147924	1.13203	PG1_GMTP-WT_GMTP
ENSMUSG00000030255.13	Sspn	-1.58958	-2.8638	-5.69263	8.87395213589357e-05	0.00147985	1.66363	PG1_GMTP-WT_GMTP
ENSMUSG00000025810.9	Nrp1	0.478673	8.37923	5.69207	8.88197112579553e-05	0.00148009	0.816284	PG1_GMTP-WT_GMTP
ENSMUSG00000045625.5	Pigz	0.631884	3.38805	5.69128	8.89322603897716e-05	0.00148085	1.12971	PG1_GMTP-WT_GMTP
ENSMUSG00000046714.7	Foxc2	-4.43172	-4.97119	-5.68938	8.9206371603811e-05	0.00148431	1.19796	PG1_GMTP-WT_GMTP
ENSMUSG00000051403.9	Ppp1r37	0.353459	5.49976	5.67977	9.06022537665744e-05	0.00150555	0.880825	PG1_GMTP-WT_GMTP
ENSMUSG00000045502.6	Hcar2	-1.55247	0.161636	-5.67923	9.06809940018768e-05	0.00150555	1.62264	PG1_GMTP-WT_GMTP
ENSMUSG00000041733.10	Coq5	0.291952	4.80423	5.67886	9.07356601309063e-05	0.00150555	0.927014	PG1_GMTP-WT_GMTP
ENSMUSG00000001416.13	Cct3	-0.331874	6.47454	-5.67874	9.07528884575964e-05	0.00150555	0.836474	PG1_GMTP-WT_GMTP
ENSMUSG00000031444.16	F10	-0.508508	6.80719	-5.67828	9.08200283152721e-05	0.00150555	0.825149	PG1_GMTP-WT_GMTP
ENSMUSG00000036768.6	Kif15	0.612402	2.44689	5.67696	9.10148526919243e-05	0.00150766	1.2736	PG1_GMTP-WT_GMTP
ENSMUSG00000079057.4	Cyp4v3	0.247911	7.63856	5.67427	9.14112651372917e-05	0.0015131	0.798021	PG1_GMTP-WT_GMTP
ENSMUSG00000031659.13	Adcy7	0.422911	8.74423	5.67278	9.16315170478458e-05	0.00151562	0.779618	PG1_GMTP-WT_GMTP
ENSMUSG00000031827.13	Cotl1	0.373608	9.3318	5.66388	9.29611759596713e-05	0.00153648	0.760226	PG1_GMTP-WT_GMTP
ENSMUSG00000037526.7	Atg14	0.365774	4.88133	5.66069	9.34425733312958e-05	0.00154262	0.89014	PG1_GMTP-WT_GMTP
ENSMUSG00000017446.14	C1qtnf1	3.86942	-3.57055	5.6605	9.34712550044474e-05	0.00154262	1.48769	PG1_GMTP-WT_GMTP
ENSMUSG00000028551.14	Cdkn2c	0.476474	4.23566	5.65802	9.38478678691393e-05	0.00154769	0.950304	PG1_GMTP-WT_GMTP
ENSMUSG00000026037.14	Orc2	-0.435921	3.87196	-5.65534	9.42554042848935e-05	0.00155281	0.993518	PG1_GMTP-WT_GMTP
ENSMUSG00000032688.9	Malt1	-0.557794	6.02713	-5.65507	9.4297258125801e-05	0.00155281	0.8134	PG1_GMTP-WT_GMTP
ENSMUSG00000030148.15	Clec4a2	-0.303453	6.94144	-5.65158	9.48308025383664e-05	0.00156044	0.776079	PG1_GMTP-WT_GMTP
ENSMUSG00000028136.15	Snx27	0.332226	7.62732	5.6501	9.50585615208224e-05	0.00156304	0.757296	PG1_GMTP-WT_GMTP
ENSMUSG00000091649.3	Phf11b	0.408061	6.03401	5.64258	9.62257098972656e-05	0.00158106	0.791931	PG1_GMTP-WT_GMTP
ENSMUSG00000045322.10	Tlr9	0.557998	6.54447	5.64197	9.63208218059974e-05	0.00158132	0.771807	PG1_GMTP-WT_GMTP
ENSMUSG00000021754.17	Map3k1	0.489287	7.02939	5.64157	9.63827711113125e-05	0.00158132	0.756738	PG1_GMTP-WT_GMTP
ENSMUSG00000024975.13	Pdcd4	0.347206	5.14286	5.64	9.66280063160893e-05	0.00158405	0.835637	PG1_GMTP-WT_GMTP
ENSMUSG00000040751.12	Lat2	0.373842	7.27204	5.6396	9.6691298538245e-05	0.00158405	0.747298	PG1_GMTP-WT_GMTP
ENSMUSG00000036986.16	Pml	0.338787	6.43734	5.63549	9.73381956872492e-05	0.00159348	0.764497	PG1_GMTP-WT_GMTP
ENSMUSG00000032328.12	Tmem30a	-0.285242	7.32714	-5.62694	9.86991446445828e-05	0.00161391	0.724486	PG1_GMTP-WT_GMTP
ENSMUSG00000020100.15	Slc29a3	0.488326	7.72043	5.62674	9.87312677764785e-05	0.00161391	0.715854	PG1_GMTP-WT_GMTP
ENSMUSG00000026023.16	Cdk15	1.05411	0.912606	5.61815	0.000100119	0.00163539	1.42542	PG1_GMTP-WT_GMTP
ENSMUSG00000036461.16	Elf1	0.328734	7.07601	5.61614	0.000100446	0.00163953	0.712328	PG1_GMTP-WT_GMTP
ENSMUSG00000038936.13	Sccpdh	-0.755282	2.40905	-5.61081	0.00010132	0.0016526	1.16953	PG1_GMTP-WT_GMTP
ENSMUSG00000101903.1	Gm29291	1.03692	0.546423	5.60769	0.000101836	0.00165981	1.45857	PG1_GMTP-WT_GMTP
ENSMUSG00000056305.4	Usp39	-0.280919	5.04189	-5.60588	0.000102137	0.00166349	0.78481	PG1_GMTP-WT_GMTP
ENSMUSG00000030203.17	Dusp16	-0.54926	3.53309	-5.60435	0.000102391	0.00166642	0.958884	PG1_GMTP-WT_GMTP
ENSMUSG00000019370.10	Calm3	-0.321292	7.78672	-5.60234	0.000102725	0.00167063	0.673105	PG1_GMTP-WT_GMTP
ENSMUSG00000044827.10	Tlr1	-0.31642	7.07632	-5.60112	0.00010293	0.00167274	0.686763	PG1_GMTP-WT_GMTP
ENSMUSG00000022893.14	Adamts1	-0.857549	1.32117	-5.59753	0.000103533	0.00168132	1.33049	PG1_GMTP-WT_GMTP
ENSMUSG00000040451.18	Sgms1	0.283098	5.81934	5.59674	0.000103666	0.00168226	0.723611	PG1_GMTP-WT_GMTP
ENSMUSG00000035944.17	Ttc38	0.359012	4.41189	5.59056	0.000104715	0.00169804	0.815704	PG1_GMTP-WT_GMTP
ENSMUSG00000030835.6	Nomo1	-0.37549	5.70805	-5.58923	0.000104942	0.00170049	0.716218	PG1_GMTP-WT_GMTP
ENSMUSG00000049521.2	Cdc42ep1	-4.57354	-3.48765	-5.5885	0.000105066	0.00170127	1.40951	PG1_GMTP-WT_GMTP
ENSMUSG00000029217.16	Tec	0.2348	6.46328	5.58766	0.000105212	0.00170239	0.682243	PG1_GMTP-WT_GMTP
ENSMUSG00000003812.13	Dnase2a	0.341289	7.17498	5.58692	0.000105338	0.00170319	0.66003	PG1_GMTP-WT_GMTP
ENSMUSG00000034708.12	Grn	0.312942	11.6816	5.5767	0.000107108	0.00173056	0.615653	PG1_GMTP-WT_GMTP
ENSMUSG00000030126.17	Tmcc1	0.348067	5.44978	5.57592	0.000107243	0.00173149	0.707339	PG1_GMTP-WT_GMTP
ENSMUSG00000031400.10	G6pdx	0.261593	7.67584	5.57321	0.000107719	0.00173792	0.625548	PG1_GMTP-WT_GMTP
ENSMUSG00000024660.9	Incenp	0.333266	6.17806	5.57085	0.000108135	0.00174307	0.664094	PG1_GMTP-WT_GMTP
ENSMUSG00000030614.8	Tmem126b	0.274734	5.2781	5.57051	0.000108195	0.00174307	0.70851	PG1_GMTP-WT_GMTP
ENSMUSG00000078453.3	Abracl	-0.467893	5.07339	-5.5682	0.000108603	0.00174799	0.718483	PG1_GMTP-WT_GMTP
ENSMUSG00000073421.6	H2-Ab1	0.388229	10.4465	5.5679	0.000108657	0.00174799	0.595097	PG1_GMTP-WT_GMTP
ENSMUSG00000038400.15	Pmepa1	-1.6466	-1.33293	-5.55218	0.000111483	0.00179217	1.53134	PG1_GMTP-WT_GMTP
ENSMUSG00000024104.11	Washc2	0.277764	7.24872	5.55116	0.000111669	0.00179386	0.597209	PG1_GMTP-WT_GMTP
ENSMUSG00000034459.8	Ifit1	-0.549567	6.64997	-5.5488	0.0001121	0.00179949	0.609789	PG1_GMTP-WT_GMTP
ENSMUSG00000029406.15	Pitpnm2	0.714941	0.969728	5.54623	0.000112573	0.00180578	1.29813	PG1_GMTP-WT_GMTP
ENSMUSG00000027381.16	Bcl2l11	0.320807	7.37134	5.54321	0.00011313	0.00181282	0.580712	PG1_GMTP-WT_GMTP
ENSMUSG00000030515.9	Tarsl2	0.419895	3.32031	5.54297	0.000113174	0.00181282	0.890655	PG1_GMTP-WT_GMTP
ENSMUSG00000028803.18	Nipal3	0.357774	5.68698	5.54103	0.000113533	0.00181689	0.635017	PG1_GMTP-WT_GMTP
ENSMUSG00000034266.6	Batf	-0.731191	2.52772	-5.54062	0.00011361	0.00181689	1.02968	PG1_GMTP-WT_GMTP
ENSMUSG00000107429.2	Gm44206	0.576545	1.4164	5.54028	0.000113673	0.00181689	1.22012	PG1_GMTP-WT_GMTP
ENSMUSG00000028885.8	Smpdl3b	-0.7161	2.86724	-5.53976	0.00011377	0.00181715	0.966011	PG1_GMTP-WT_GMTP
ENSMUSG00000025464.15	Paox	0.312618	4.6635	5.53874	0.00011396	0.00181855	0.701924	PG1_GMTP-WT_GMTP
ENSMUSG00000004151.17	Etv1	-0.799187	1.89614	-5.53809	0.000114081	0.00181855	1.13742	PG1_GMTP-WT_GMTP
ENSMUSG00000034028.16	Cd226	3.79212	-3.88187	5.53759	0.000114174	0.00181855	1.25318	PG1_GMTP-WT_GMTP
ENSMUSG00000062515.3	Fabp4	0.431491	7.44012	5.53728	0.000114234	0.00181855	0.569022	PG1_GMTP-WT_GMTP
ENSMUSG00000047180.8	Neurl3	0.293982	8.29701	5.53692	0.0001143	0.00181855	0.553398	PG1_GMTP-WT_GMTP
ENSMUSG00000039275.9	Foxk2	-0.314732	5.47087	-5.53667	0.000114347	0.00181855	0.639152	PG1_GMTP-WT_GMTP
ENSMUSG00000070002.7	Ell	0.412524	5.04525	5.53436	0.000114779	0.00182413	0.662707	PG1_GMTP-WT_GMTP
ENSMUSG00000069456.4	Rdh16	-2.65998	-7.33774	-5.53336	0.000114969	0.00182583	0.432032	PG1_GMTP-WT_GMTP
ENSMUSG00000031708.17	Tecr	-0.355711	6.55469	-5.53112	0.000115391	0.00183124	0.582587	PG1_GMTP-WT_GMTP
ENSMUSG00000073985.2	Gm10602	0.713129	0.905354	5.52846	0.000115894	0.00183749	1.27791	PG1_GMTP-WT_GMTP
ENSMUSG00000014686.8	Ceacam16	1.35375	0.173708	5.52817	0.00011595	0.00183749	1.37517	PG1_GMTP-WT_GMTP
ENSMUSG00000049709.4	Nlrp10	0.690507	2.43441	5.52688	0.000116194	0.00183933	1.02346	PG1_GMTP-WT_GMTP
ENSMUSG00000065037.1	Rn7sk	1.32749	0.403859	5.52669	0.000116231	0.00183933	1.34393	PG1_GMTP-WT_GMTP
ENSMUSG00000091415.5	Ak9	1.85119	-2.79572	5.52548	0.000116462	0.00184164	1.43382	PG1_GMTP-WT_GMTP
ENSMUSG00000032750.13	Gab3	0.666042	2.94119	5.52506	0.000116542	0.00184164	0.927729	PG1_GMTP-WT_GMTP
ENSMUSG00000030852.18	Tacc2	0.49396	3.29231	5.52396	0.000116752	0.00184365	0.863084	PG1_GMTP-WT_GMTP
ENSMUSG00000063694.5	Cycs	-0.443396	5.86602	-5.51923	0.000117661	0.00185669	0.589076	PG1_GMTP-WT_GMTP
ENSMUSG00000029814.10	Igf2bp3	0.64303	2.26039	5.51795	0.000117907	0.00185926	1.03975	PG1_GMTP-WT_GMTP
ENSMUSG00000023966.8	Rsph9	0.699761	2.13256	5.51623	0.00011824	0.0018632	1.05954	PG1_GMTP-WT_GMTP
ENSMUSG00000024410.15	Rmc1	-0.375866	4.84842	-5.51005	0.000119445	0.00188086	0.63643	PG1_GMTP-WT_GMTP
ENSMUSG00000019795.17	Pcmt1	-0.295968	6.11837	-5.50843	0.000119763	0.00188347	0.559684	PG1_GMTP-WT_GMTP
ENSMUSG00000029330.8	Cds1	-0.344035	4.58254	-5.50834	0.000119779	0.00188347	0.657566	PG1_GMTP-WT_GMTP
ENSMUSG00000008393.9	Carhsp1	-0.258121	5.89215	-5.50781	0.000119884	0.00188378	0.568325	PG1_GMTP-WT_GMTP
ENSMUSG00000067194.6	Eif1ax	-0.290777	5.68442	-5.50487	0.000120464	0.00189078	0.573246	PG1_GMTP-WT_GMTP
ENSMUSG00000020917.17	Acly	-0.256363	7.72452	-5.50457	0.000120523	0.00189078	0.507177	PG1_GMTP-WT_GMTP
ENSMUSG00000092274.3	Neat1	0.536909	8.09318	5.50415	0.000120607	0.00189078	0.50015	PG1_GMTP-WT_GMTP
ENSMUSG00000034462.9	Pkd2	-0.280467	5.00251	-5.50342	0.00012075	0.00189078	0.612882	PG1_GMTP-WT_GMTP
ENSMUSG00000027469.16	Tpx2	0.356455	4.55279	5.50341	0.000120753	0.00189078	0.652119	PG1_GMTP-WT_GMTP
ENSMUSG00000009292.18	Trpm2	0.584033	2.99373	5.50256	0.000120922	0.0018921	0.879882	PG1_GMTP-WT_GMTP
ENSMUSG00000033446.7	Lpar6	0.37787	5.29309	5.5021	0.000121014	0.0018922	0.59066	PG1_GMTP-WT_GMTP
ENSMUSG00000038060.15	Dlec1	1.51618	-1.8871	5.49949	0.000121533	0.00189788	1.45245	PG1_GMTP-WT_GMTP
ENSMUSG00000051343.11	Rab11fip5	0.288625	8.00822	5.49942	0.000121547	0.00189788	0.493357	PG1_GMTP-WT_GMTP
ENSMUSG00000033033.10	Calhm2	0.282395	5.20846	5.4989	0.000121651	0.00189817	0.590558	PG1_GMTP-WT_GMTP
ENSMUSG00000033949.12	Trim36	0.325732	4.54391	5.49772	0.000121887	0.00190036	0.643293	PG1_GMTP-WT_GMTP
ENSMUSG00000026648.18	Dclre1c	0.465247	5.46349	5.49735	0.000121961	0.00190036	0.572233	PG1_GMTP-WT_GMTP
ENSMUSG00000032479.15	Map4	-0.285148	7.52844	-5.49461	0.00012251	0.00190706	0.494005	PG1_GMTP-WT_GMTP
ENSMUSG00000073722.3	4931408C20Rik	2.40933	-7.30827	5.49413	0.000122606	0.00190706	0.400494	PG1_GMTP-WT_GMTP
ENSMUSG00000096316.7	Faiml	-3.22791	-6.82425	-5.49393	0.000122648	0.00190706	0.519007	PG1_GMTP-WT_GMTP
ENSMUSG00000030401.16	Rtn2	-1.53619	0.0320939	-5.49267	0.000122901	0.00190866	1.33366	PG1_GMTP-WT_GMTP
ENSMUSG00000031934.14	Panx1	-0.363256	3.80126	-5.49257	0.000122921	0.00190866	0.727363	PG1_GMTP-WT_GMTP
ENSMUSG00000086851.1	A430108G06Rik	1.72407	-0.565055	5.49194	0.00012305	0.00190933	1.3925	PG1_GMTP-WT_GMTP
ENSMUSG00000028617.10	Lrrc42	-0.432555	4.30473	-5.4859	0.000124277	0.00192702	0.649103	PG1_GMTP-WT_GMTP
ENSMUSG00000038836.15	Agbl3	0.976193	0.603159	5.48483	0.000124495	0.00192907	1.24812	PG1_GMTP-WT_GMTP
ENSMUSG00000001555.10	Fkbp10	-1.42485	-0.262798	-5.48219	0.000125037	0.00193612	1.34862	PG1_GMTP-WT_GMTP
ENSMUSG00000061353.11	Cxcl12	-1.15749	-0.0445326	-5.48172	0.000125134	0.00193628	1.32446	PG1_GMTP-WT_GMTP
ENSMUSG00000036928.14	Stag3	1.48411	-0.38783	5.47873	0.000125751	0.00194448	1.35527	PG1_GMTP-WT_GMTP
ENSMUSG00000067818.6	Myl9	-1.44536	-0.662173	-5.47303	0.000126935	0.00196142	1.36986	PG1_GMTP-WT_GMTP
ENSMUSG00000041975.17	Mettl8	0.472193	3.47575	5.47213	0.000127124	0.00196224	0.743166	PG1_GMTP-WT_GMTP
ENSMUSG00000117527.1	Gm50058	-2.80539	-7.01656	-5.47194	0.000127163	0.00196224	0.449079	PG1_GMTP-WT_GMTP
ENSMUSG00000028800.15	Hdac1	-0.332963	5.86797	-5.47053	0.000127459	0.00196544	0.505435	PG1_GMTP-WT_GMTP
ENSMUSG00000040907.15	Atp1a3	0.323822	8.68726	5.46697	0.000128207	0.00197561	0.428793	PG1_GMTP-WT_GMTP
ENSMUSG00000030469.10	Zfp719	-0.634164	1.89883	-5.46394	0.000128849	0.00198413	1.01185	PG1_GMTP-WT_GMTP
ENSMUSG00000031584.16	Gsr	-0.317257	5.84196	-5.46193	0.000129275	0.00198933	0.491882	PG1_GMTP-WT_GMTP
ENSMUSG00000030410.16	Dmwd	-1.96223	-1.13893	-5.45955	0.000129784	0.00199578	1.37841	PG1_GMTP-WT_GMTP
ENSMUSG00000074364.6	Ehd2	-0.912932	-0.243076	-5.45414	0.000130947	0.00201227	1.3008	PG1_GMTP-WT_GMTP
ENSMUSG00000033016.16	Nfatc1	0.311755	5.99905	5.453	0.000131191	0.00201464	0.469531	PG1_GMTP-WT_GMTP
ENSMUSG00000055053.18	Nfic	0.380444	6.39141	5.45209	0.000131389	0.00201629	0.452568	PG1_GMTP-WT_GMTP
ENSMUSG00000023809.10	Rps6ka2	0.46289	5.37868	5.4493	0.000131995	0.0020242	0.494704	PG1_GMTP-WT_GMTP
ENSMUSG00000020808.3	Pimreg	0.84454	2.10006	5.44639	0.000132629	0.00203253	0.947028	PG1_GMTP-WT_GMTP
ENSMUSG00000032320.7	Rcn2	-0.293112	5.34763	-5.44141	0.000133725	0.00204791	0.483037	PG1_GMTP-WT_GMTP
ENSMUSG00000028034.15	Fubp1	-0.346886	5.34408	-5.44041	0.000133946	0.00204988	0.481536	PG1_GMTP-WT_GMTP
ENSMUSG00000015176.11	Nolc1	-0.352084	4.82169	-5.43168	0.000135889	0.0020782	0.504009	PG1_GMTP-WT_GMTP
ENSMUSG00000085795.8	Zfp703	0.321829	5.69063	5.42741	0.000136851	0.00209147	0.439772	PG1_GMTP-WT_GMTP
ENSMUSG00000000530.16	Acvrl1	0.381311	5.45757	5.42513	0.000137366	0.00209791	0.448395	PG1_GMTP-WT_GMTP
ENSMUSG00000026430.16	Rassf5	0.275424	5.793	5.42158	0.000138176	0.00210883	0.424737	PG1_GMTP-WT_GMTP
ENSMUSG00000114869.1	Gm48876	4.24109	-6.15551	5.41872	0.00013883	0.00211737	0.602018	PG1_GMTP-WT_GMTP
ENSMUSG00000030042.15	Pole4	-0.43437	4.54914	-5.41635	0.000139374	0.00212422	0.502963	PG1_GMTP-WT_GMTP
ENSMUSG00000087221.3	BC037032	1.75949	-1.59819	5.41543	0.000139586	0.002126	1.32278	PG1_GMTP-WT_GMTP
ENSMUSG00000053846.5	Lipg	-1.98802	-0.292177	-5.41491	0.000139707	0.00212639	1.24172	PG1_GMTP-WT_GMTP
ENSMUSG00000039357.2	Fut11	-0.323733	5.18342	-5.41444	0.000139815	0.00212659	0.447038	PG1_GMTP-WT_GMTP
ENSMUSG00000005950.14	P2rx5	-1.0167	1.2818	-5.4105	0.000140731	0.00213905	1.02331	PG1_GMTP-WT_GMTP
ENSMUSG00000031497.9	Tnfsf13b	0.91053	1.50723	5.408	0.000141312	0.00214643	0.982799	PG1_GMTP-WT_GMTP
ENSMUSG00000071311.2	Gpr31b	0.980274	0.862951	5.40666	0.000141628	0.0021483	1.08062	PG1_GMTP-WT_GMTP
ENSMUSG00000025795.8	Rassf3	0.244296	7.36028	5.40666	0.000141628	0.0021483	0.346173	PG1_GMTP-WT_GMTP
ENSMUSG00000030748.9	Il4ra	-0.344893	6.62919	-5.39891	0.000143455	0.00217454	0.352775	PG1_GMTP-WT_GMTP
ENSMUSG00000082481.1	Rps12-ps19	3.68054	-4.53726	5.39482	0.000144432	0.00218786	0.935154	PG1_GMTP-WT_GMTP
ENSMUSG00000009687.14	Fxyd5	0.26175	8.43507	5.39365	0.000144712	0.00219061	0.305045	PG1_GMTP-WT_GMTP
ENSMUSG00000026228.6	Htr2b	0.565315	2.7216	5.39177	0.000145162	0.00219594	0.740509	PG1_GMTP-WT_GMTP
ENSMUSG00000027293.13	Ehd4	0.242924	9.4521	5.39082	0.000145392	0.00219792	0.291904	PG1_GMTP-WT_GMTP
ENSMUSG00000020261.15	Slc36a1	0.358715	6.61073	5.3897	0.000145661	0.00220049	0.337437	PG1_GMTP-WT_GMTP
ENSMUSG00000005034.15	Prkacb	0.311944	7.48334	5.38897	0.000145839	0.00220169	0.312843	PG1_GMTP-WT_GMTP
ENSMUSG00000053835.17	H2-T24	0.365967	7.12873	5.38549	0.000146682	0.00221292	0.315186	PG1_GMTP-WT_GMTP
ENSMUSG00000030259.12	Rassf8	0.404385	5.71837	5.38354	0.000147156	0.00221745	0.36265	PG1_GMTP-WT_GMTP
ENSMUSG00000001248.15	Gramd1a	-0.357138	5.40153	-5.38344	0.000147181	0.00221745	0.379679	PG1_GMTP-WT_GMTP
ENSMUSG00000050953.10	Gja1	-1.37859	0.303379	-5.38276	0.000147347	0.00221846	1.11856	PG1_GMTP-WT_GMTP
ENSMUSG00000029108.14	Pcdh7	-0.422979	6.11927	-5.37921	0.000148216	0.00223004	0.337049	PG1_GMTP-WT_GMTP
ENSMUSG00000020399.14	Havcr2	0.470842	3.93911	5.37684	0.000148801	0.00223733	0.508462	PG1_GMTP-WT_GMTP
ENSMUSG00000035824.7	Tk2	0.3497	5.69977	5.37468	0.000149335	0.00224384	0.34822	PG1_GMTP-WT_GMTP
ENSMUSG00000003541.6	Ier3	-0.541326	2.72714	-5.37212	0.00014997	0.00225043	0.705776	PG1_GMTP-WT_GMTP
ENSMUSG00000047592.17	Nxpe5	-0.443335	4.9939	-5.3721	0.000149975	0.00225043	0.387418	PG1_GMTP-WT_GMTP
ENSMUSG00000032724.5	Abtb2	-1.56223	0.0106086	-5.37168	0.000150081	0.00225051	1.13674	PG1_GMTP-WT_GMTP
ENSMUSG00000020032.14	Nuak1	0.465293	4.7963	5.37023	0.000150441	0.00225392	0.400061	PG1_GMTP-WT_GMTP
ENSMUSG00000019139.10	Isyna1	-0.412419	5.92351	-5.36995	0.000150511	0.00225392	0.329405	PG1_GMTP-WT_GMTP
ENSMUSG00000026358.13	Rgs1	-0.344242	6.04631	-5.36734	0.000151165	0.0022622	0.319534	PG1_GMTP-WT_GMTP
ENSMUSG00000028641.16	P3h1	-0.354943	3.89467	-5.36659	0.000151352	0.00226231	0.497096	PG1_GMTP-WT_GMTP
ENSMUSG00000055531.12	Cpsf6	-0.263814	5.59872	-5.3665	0.000151375	0.00226231	0.339326	PG1_GMTP-WT_GMTP
ENSMUSG00000085051.1	Gm11542	2.08848	-2.43549	5.36383	0.000152048	0.00227085	1.22591	PG1_GMTP-WT_GMTP
ENSMUSG00000042747.12	Krtcap2	-0.337229	4.66229	-5.36066	0.00015285	0.00228131	0.395864	PG1_GMTP-WT_GMTP
ENSMUSG00000037849.8	Ifi206	0.650713	5.33675	5.35624	0.000153977	0.00229659	0.336582	PG1_GMTP-WT_GMTP
ENSMUSG00000109176.1	Zfp264	2.40933	-7.2968	5.35435	0.000154464	0.0023023	0.262561	PG1_GMTP-WT_GMTP
ENSMUSG00000014778.10	Fhod1	-0.416578	4.85438	-5.35299	0.000154812	0.00230596	0.365454	PG1_GMTP-WT_GMTP
ENSMUSG00000024773.15	Atg2a	0.328121	6.0973	5.35249	0.000154941	0.00230633	0.29164	PG1_GMTP-WT_GMTP
ENSMUSG00000066306.13	Numa1	0.40203	7.75188	5.35098	0.000155332	0.00231061	0.241567	PG1_GMTP-WT_GMTP
ENSMUSG00000022221.14	Ripk3	0.365336	4.2143	5.3485	0.000155972	0.00231859	0.423434	PG1_GMTP-WT_GMTP
ENSMUSG00000108371.1	Gm38832	3.49944	-2.32984	5.34482	0.000156929	0.00233127	1.20262	PG1_GMTP-WT_GMTP
ENSMUSG00000074227.12	Spint2	-1.67895	-0.83277	-5.3425	0.000157536	0.00233872	1.17178	PG1_GMTP-WT_GMTP
ENSMUSG00000001056.3	Nhp2	-0.388841	4.93335	-5.342	0.000157668	0.00233912	0.340038	PG1_GMTP-WT_GMTP
ENSMUSG00000048621.3	Gm6377	0.477679	3.51826	5.34151	0.000157796	0.00233947	0.511606	PG1_GMTP-WT_GMTP
ENSMUSG00000031485.15	Plpbp	0.290956	5.54518	5.34082	0.000157977	0.0023406	0.297732	PG1_GMTP-WT_GMTP
ENSMUSG00000056724.15	Nbeal2	0.410685	6.26929	5.33967	0.000158281	0.00234355	0.262618	PG1_GMTP-WT_GMTP
ENSMUSG00000043795.10	Prr33	2.41259	-1.66444	5.33683	0.000159031	0.00235309	1.20034	PG1_GMTP-WT_GMTP
ENSMUSG00000013418.8	B4galnt2	0.736845	0.713252	5.33261	0.000160151	0.00236636	0.977976	PG1_GMTP-WT_GMTP
ENSMUSG00000026669.14	Mcm10	0.444507	2.99156	5.33258	0.00016016	0.00236636	0.589016	PG1_GMTP-WT_GMTP
ENSMUSG00000048371.8	Pdp2	-0.348795	4.53794	-5.33199	0.000160316	0.00236636	0.358268	PG1_GMTP-WT_GMTP
ENSMUSG00000022505.9	Emp2	-0.375614	3.8477	-5.33186	0.000160352	0.00236636	0.443931	PG1_GMTP-WT_GMTP
ENSMUSG00000021236.16	Entpd5	-0.361287	4.87921	-5.33085	0.000160621	0.00236826	0.325063	PG1_GMTP-WT_GMTP
ENSMUSG00000043017.9	Ptgir	0.437503	4.28285	5.33058	0.000160693	0.00236826	0.384064	PG1_GMTP-WT_GMTP
ENSMUSG00000055612.15	Cdca7	-0.600091	1.79	-5.32991	0.000160875	0.00236937	0.80253	PG1_GMTP-WT_GMTP
ENSMUSG00000020120.15	Plek	-0.303533	8.81514	-5.32303	0.000162729	0.0023951	0.178496	PG1_GMTP-WT_GMTP
ENSMUSG00000022295.8	Atp6v1c1	0.257757	8.33035	5.32114	0.000163241	0.00240105	0.180556	PG1_GMTP-WT_GMTP
ENSMUSG00000074657.5	Kif5a	0.587274	2.68057	5.31969	0.000163636	0.00240528	0.624205	PG1_GMTP-WT_GMTP
ENSMUSG00000038612.16	Mcl1	0.240292	10.1335	5.30947	0.00016645	0.00244503	0.149104	PG1_GMTP-WT_GMTP
ENSMUSG00000027332.11	Ivd	0.31834	5.26513	5.30787	0.000166894	0.00244994	0.257014	PG1_GMTP-WT_GMTP
ENSMUSG00000078429.9	Ctdsp2	0.306042	7.5551	5.30464	0.000167798	0.00246158	0.164866	PG1_GMTP-WT_GMTP
ENSMUSG00000022013.4	Dnajc15	0.331682	4.85365	5.30398	0.000167982	0.00246267	0.28043	PG1_GMTP-WT_GMTP
ENSMUSG00000024953.17	Prdx5	-0.398011	8.21619	-5.30279	0.000168315	0.00246593	0.150145	PG1_GMTP-WT_GMTP
ENSMUSG00000068246.6	Apol9b	0.952473	0.992464	5.30139	0.000168709	0.00246877	0.88362	PG1_GMTP-WT_GMTP
ENSMUSG00000103009.1	Gm4430	-0.931703	0.766553	-5.30132	0.00016873	0.00246877	0.917395	PG1_GMTP-WT_GMTP
ENSMUSG00000117239.1	Gpr31c	0.755293	2.9283	5.29976	0.000169168	0.00247355	0.544011	PG1_GMTP-WT_GMTP
ENSMUSG00000118026.1	Gm50335	2.41975	-3.51873	5.29929	0.000169303	0.0024739	1.00513	PG1_GMTP-WT_GMTP
ENSMUSG00000037351.9	Actr1b	-0.254849	6.42206	-5.294	0.000170803	0.00249335	0.177637	PG1_GMTP-WT_GMTP
ENSMUSG00000019122.8	Ccl9	-0.388595	9.63056	-5.29355	0.000170934	0.00249335	0.122202	PG1_GMTP-WT_GMTP
ENSMUSG00000026113.17	Inpp4a	0.360562	5.88794	5.29342	0.000170969	0.00249335	0.198025	PG1_GMTP-WT_GMTP
ENSMUSG00000036138.16	Acaa1a	-0.41317	6.94991	-5.28817	0.000172477	0.0025137	0.150829	PG1_GMTP-WT_GMTP
ENSMUSG00000024339.12	Tap2	-0.404761	6.11006	-5.28546	0.000173259	0.00252345	0.174539	PG1_GMTP-WT_GMTP
ENSMUSG00000016477.18	E2f3	-0.329068	4.51289	-5.28397	0.000173692	0.0025281	0.277458	PG1_GMTP-WT_GMTP
ENSMUSG00000048824.7	Gm568	1.65316	-1.2831	5.27877	0.000175208	0.00254711	1.09634	PG1_GMTP-WT_GMTP
ENSMUSG00000054720.12	Lrrc8c	-0.415707	4.63557	-5.27871	0.000175226	0.00254711	0.256059	PG1_GMTP-WT_GMTP
ENSMUSG00000033420.12	Antxr1	-0.758943	1.28004	-5.27749	0.000175583	0.00255064	0.797856	PG1_GMTP-WT_GMTP
ENSMUSG00000039512.12	Uhrf1bp1	0.502119	5.75225	5.27627	0.000175943	0.00255421	0.174636	PG1_GMTP-WT_GMTP
ENSMUSG00000022676.7	Snai2	-2.65417	-2.2398	-5.27228	0.000177121	0.0025693	1.09514	PG1_GMTP-WT_GMTP
ENSMUSG00000008129.14	4930432K21Rik	1.03687	-0.294118	5.27152	0.000177348	0.0025693	1.00551	PG1_GMTP-WT_GMTP
ENSMUSG00000034343.14	Ube2f	-0.33253	5.63041	-5.27138	0.000177387	0.0025693	0.17224	PG1_GMTP-WT_GMTP
ENSMUSG00000068874.13	Selenbp1	0.505807	4.36443	5.2712	0.000177443	0.0025693	0.271215	PG1_GMTP-WT_GMTP
ENSMUSG00000021211.4	Akr1c12	0.664962	2.15344	5.26809	0.000178369	0.0025791	0.632406	PG1_GMTP-WT_GMTP
ENSMUSG00000055371.17	Stam2	0.277482	5.84975	5.26799	0.000178399	0.0025791	0.155448	PG1_GMTP-WT_GMTP
ENSMUSG00000112148.1	Lilrb4a	-0.375739	6.43126	-5.267	0.000178695	0.0025791	0.130198	PG1_GMTP-WT_GMTP
ENSMUSG00000099974.1	Bcl2a1d	-0.596661	3.99256	-5.26699	0.000178696	0.0025791	0.310833	PG1_GMTP-WT_GMTP
ENSMUSG00000028756.12	Pink1	0.34275	6.52574	5.26684	0.000178742	0.0025791	0.126624	PG1_GMTP-WT_GMTP
ENSMUSG00000052512.17	Nav2	0.628617	5.02169	5.26648	0.000178848	0.0025791	0.20182	PG1_GMTP-WT_GMTP
ENSMUSG00000000320.10	Alox12	1.47164	-1.52425	5.26621	0.000178929	0.0025791	1.08547	PG1_GMTP-WT_GMTP
ENSMUSG00000059060.15	Rad51b	1.31224	-0.159482	5.25548	0.000182177	0.00262405	0.963659	PG1_GMTP-WT_GMTP
ENSMUSG00000034271.16	Jdp2	-0.570263	2.73443	-5.25513	0.000182283	0.00262405	0.502643	PG1_GMTP-WT_GMTP
ENSMUSG00000073418.4	C4b	1.56477	-0.956991	5.25385	0.000182673	0.00262796	1.03667	PG1_GMTP-WT_GMTP
ENSMUSG00000066595.9	Flvcr1	0.294955	6.71513	5.25287	0.000182974	0.00263061	0.0961025	PG1_GMTP-WT_GMTP
ENSMUSG00000021830.14	Txndc16	0.364395	5.85595	5.25076	0.000183622	0.00263822	0.125067	PG1_GMTP-WT_GMTP
ENSMUSG00000021983.16	Atp8a2	-1.10478	-0.818236	-5.2492	0.000184103	0.00264311	1.01853	PG1_GMTP-WT_GMTP
ENSMUSG00000030407.2	Qpctl	-0.392937	4.10313	-5.24877	0.000184237	0.00264311	0.264082	PG1_GMTP-WT_GMTP
ENSMUSG00000053411.16	Cbx7	0.490707	2.95744	5.24851	0.000184317	0.00264311	0.449858	PG1_GMTP-WT_GMTP
ENSMUSG00000046808.17	Atp10d	0.759917	2.4723	5.24755	0.000184613	0.00264565	0.538497	PG1_GMTP-WT_GMTP
ENSMUSG00000071072.12	Ptges3	-0.339885	6.14366	-5.24677	0.000184856	0.00264742	0.105654	PG1_GMTP-WT_GMTP
ENSMUSG00000051378.10	Kif18b	0.813704	1.80279	5.24346	0.000185885	0.00265904	0.652084	PG1_GMTP-WT_GMTP
ENSMUSG00000032827.15	Ppp1r9a	1.25247	0.604222	5.24339	0.000185905	0.00265904	0.842963	PG1_GMTP-WT_GMTP
ENSMUSG00000031295.13	Phka2	0.290906	6.25352	5.24298	0.000186033	0.00265917	0.0947217	PG1_GMTP-WT_GMTP
ENSMUSG00000028195.4	Ccn1	-1.6655	0.235506	-5.24022	0.000186896	0.00266979	0.888767	PG1_GMTP-WT_GMTP
ENSMUSG00000027200.17	Sema6d	0.859421	1.2841	5.23874	0.000187364	0.00267476	0.730961	PG1_GMTP-WT_GMTP
ENSMUSG00000040289.8	Hey1	0.779729	2.31264	5.23472	0.000188633	0.00269111	0.545818	PG1_GMTP-WT_GMTP
ENSMUSG00000020869.8	Lrrc59	-0.284242	7.28635	-5.23434	0.000188751	0.00269111	0.048142	PG1_GMTP-WT_GMTP
ENSMUSG00000040616.3	Tmem51	0.304298	5.54045	5.23393	0.000188882	0.00269126	0.111722	PG1_GMTP-WT_GMTP
ENSMUSG00000020264.5	Slc36a2	1.14628	0.714335	5.2332	0.000189113	0.00269284	0.809614	PG1_GMTP-WT_GMTP
ENSMUSG00000040006.13	Ginm1	-0.362716	4.50635	-5.23266	0.000189284	0.00269346	0.18868	PG1_GMTP-WT_GMTP
ENSMUSG00000070730.11	Rmdn3	-0.302678	4.57531	-5.2323	0.000189398	0.00269346	0.180853	PG1_GMTP-WT_GMTP
ENSMUSG00000069094.12	Pde7a	0.532779	3.72758	5.23022	0.000190062	0.00270117	0.285083	PG1_GMTP-WT_GMTP
ENSMUSG00000037509.21	Arhgef4	0.666277	1.64732	5.2286	0.000190578	0.00270679	0.653255	PG1_GMTP-WT_GMTP
ENSMUSG00000047712.8	Ust	-0.571879	3.14206	-5.22641	0.000191282	0.00271409	0.377771	PG1_GMTP-WT_GMTP
ENSMUSG00000040990.17	Sh3kbp1	0.245472	7.28697	5.22609	0.000191383	0.00271409	0.0336817	PG1_GMTP-WT_GMTP
ENSMUSG00000029810.15	Tmem176b	-0.338515	6.55101	-5.22586	0.000191457	0.00271409	0.0541141	PG1_GMTP-WT_GMTP
ENSMUSG00000002297.16	Dbf4	0.432837	3.92135	5.22521	0.000191669	0.00271537	0.247719	PG1_GMTP-WT_GMTP
ENSMUSG00000006390.15	Elovl1	-0.323217	6.77776	-5.22192	0.000192732	0.0027287	0.0400013	PG1_GMTP-WT_GMTP
ENSMUSG00000037235.13	Mxd4	0.316107	6.98797	5.22067	0.000193135	0.00273267	0.0317827	PG1_GMTP-WT_GMTP
ENSMUSG00000079553.11	Kifc1	0.658429	3.28452	5.22015	0.000193304	0.00273301	0.341167	PG1_GMTP-WT_GMTP
ENSMUSG00000044629.5	Cnrip1	0.608704	3.29251	5.21984	0.000193404	0.00273301	0.339241	PG1_GMTP-WT_GMTP
ENSMUSG00000018909.15	Arrb1	0.393938	8.20516	5.21862	0.000193801	0.00273689	0.00318461	PG1_GMTP-WT_GMTP
ENSMUSG00000024556.4	Me2	0.291722	5.16177	5.21814	0.00019396	0.0027374	0.10735	PG1_GMTP-WT_GMTP
ENSMUSG00000024675.19	Ms4a4c	0.524012	6.41231	5.21498	0.000194993	0.00275024	0.0398573	PG1_GMTP-WT_GMTP
ENSMUSG00000009654.4	Oit3	0.398781	3.61127	5.21088	0.000196341	0.00276751	0.269724	PG1_GMTP-WT_GMTP
ENSMUSG00000029752.12	Asns	-0.529792	2.63124	-5.21047	0.000196478	0.00276768	0.44432	PG1_GMTP-WT_GMTP
ENSMUSG00000085914.1	Gm14320	2.84839	-3.08192	5.20662	0.000197753	0.00278389	0.936427	PG1_GMTP-WT_GMTP
ENSMUSG00000022962.15	Gart	-0.288451	5.53246	-5.20492	0.000198321	0.00279012	0.0613535	PG1_GMTP-WT_GMTP
ENSMUSG00000048696.11	Mex3d	-0.28763	3.78433	-5.20426	0.000198541	0.00279146	0.231352	PG1_GMTP-WT_GMTP
ENSMUSG00000002409.18	Dyrk1b	0.467229	4.25343	5.20265	0.000199078	0.00279649	0.164778	PG1_GMTP-WT_GMTP
ENSMUSG00000032849.14	Abcc4	-0.394112	4.50231	-5.20226	0.00019921	0.00279649	0.135933	PG1_GMTP-WT_GMTP
ENSMUSG00000020873.15	Slc35b1	-0.302788	5.04558	-5.20207	0.000199275	0.00279649	0.087467	PG1_GMTP-WT_GMTP
ENSMUSG00000024817.13	Uhrf2	0.248708	7.00492	5.19887	0.00020035	0.00280981	-0.00690363	PG1_GMTP-WT_GMTP
ENSMUSG00000087518.1	Gm13561	-3.49817	-7.29107	-5.19801	0.00020064	0.00281211	0.102127	PG1_GMTP-WT_GMTP
ENSMUSG00000020400.17	Tnip1	-0.292743	7.02593	-5.19747	0.000200823	0.00281291	-0.00991628	PG1_GMTP-WT_GMTP
ENSMUSG00000020865.16	Abcc3	0.469837	7.08312	5.19376	0.000202081	0.00282875	-0.017929	PG1_GMTP-WT_GMTP
ENSMUSG00000090877.3	Hspa1b	-0.826096	1.60762	-5.19307	0.000202316	0.00283027	0.598814	PG1_GMTP-WT_GMTP
ENSMUSG00000026842.16	Abl1	0.342104	6.78677	5.18832	0.000203944	0.00285125	-0.019208	PG1_GMTP-WT_GMTP
ENSMUSG00000036019.8	Tmtc2	-0.945842	1.09614	-5.18506	0.000205065	0.00286387	0.669028	PG1_GMTP-WT_GMTP
ENSMUSG00000027130.15	Slc12a6	0.27922	5.94846	5.18495	0.000205103	0.00286387	0.00561386	PG1_GMTP-WT_GMTP
ENSMUSG00000002504.15	Slc9a3r2	1.47184	0.645005	5.18379	0.000205507	0.00286638	0.735719	PG1_GMTP-WT_GMTP
ENSMUSG00000052861.13	Dnah6	1.91923	-1.37961	5.18369	0.00020554	0.00286638	0.947607	PG1_GMTP-WT_GMTP
ENSMUSG00000063810.7	Alms1	0.886288	2.58498	5.18225	0.000206039	0.00287155	0.403995	PG1_GMTP-WT_GMTP
ENSMUSG00000016528.10	Mapkapk2	-0.335624	8.18594	-5.1786	0.000207311	0.00288747	-0.0668042	PG1_GMTP-WT_GMTP
ENSMUSG00000028445.7	Enho	2.43089	-2.46736	5.17784	0.000207577	0.00288924	0.941391	PG1_GMTP-WT_GMTP
ENSMUSG00000029430.13	Ran	-0.326409	6.83029	-5.1775	0.000207697	0.00288924	-0.0394824	PG1_GMTP-WT_GMTP
ENSMUSG00000005683.8	Cs	-0.240051	7.53371	-5.17705	0.000207854	0.00288963	-0.0579801	PG1_GMTP-WT_GMTP
ENSMUSG00000042498.16	Radx	-1.33234	-0.201838	-5.17302	0.000209271	0.00290751	0.830718	PG1_GMTP-WT_GMTP
ENSMUSG00000028268.14	Gbp3	-0.420614	6.60301	-5.16848	0.000210883	0.00292808	-0.0482902	PG1_GMTP-WT_GMTP
ENSMUSG00000026832.12	Cytip	0.440958	4.85451	5.16634	0.000211647	0.00293686	0.0397559	PG1_GMTP-WT_GMTP
ENSMUSG00000027496.15	Aurka	0.615112	2.95664	5.16578	0.000211844	0.00293713	0.305972	PG1_GMTP-WT_GMTP
ENSMUSG00000003421.13	Nosip	0.340836	5.67226	5.16555	0.000211929	0.00293713	-0.0153502	PG1_GMTP-WT_GMTP
ENSMUSG00000029468.17	P2rx7	0.318598	6.7324	5.16047	0.000213755	0.00296059	-0.0665343	PG1_GMTP-WT_GMTP
ENSMUSG00000026586.16	Prrx1	-1.13574	0.0775959	-5.15894	0.000214309	0.00296642	0.772472	PG1_GMTP-WT_GMTP
ENSMUSG00000022858.16	Tra2b	-0.323812	6.13015	-5.1497	0.00021768	0.00301122	-0.0641557	PG1_GMTP-WT_GMTP
ENSMUSG00000034485.10	Uaca	0.542948	2.99172	5.1439	0.000219824	0.00303899	0.261183	PG1_GMTP-WT_GMTP
ENSMUSG00000029066.12	Mrpl20	-0.376271	4.44717	-5.13804	0.000222017	0.00306741	0.0291484	PG1_GMTP-WT_GMTP
ENSMUSG00000029409.7	U90926	-4.91204	-6.70023	-5.13664	0.000222541	0.00307275	0.164522	PG1_GMTP-WT_GMTP
ENSMUSG00000034707.7	Gns	0.260704	10.277	5.13615	0.000222728	0.00307342	-0.154702	PG1_GMTP-WT_GMTP
ENSMUSG00000022010.19	Tsc22d1	0.280573	6.04294	5.13193	0.000224322	0.00309351	-0.0918248	PG1_GMTP-WT_GMTP
ENSMUSG00000006931.15	P3h4	-1.9619	-1.34499	-5.12839	0.000225673	0.00311022	0.85628	PG1_GMTP-WT_GMTP
ENSMUSG00000025790.14	Slco3a1	-0.561882	4.06179	-5.12736	0.000226066	0.0031132	0.0570249	PG1_GMTP-WT_GMTP
ENSMUSG00000074282.10	Zfp94	0.636368	1.42704	5.12709	0.000226169	0.0031132	0.515362	PG1_GMTP-WT_GMTP
ENSMUSG00000020423.6	Btg2	-0.305223	5.48079	-5.12653	0.000226385	0.00311374	-0.0736318	PG1_GMTP-WT_GMTP
ENSMUSG00000024659.15	Anxa1	0.243359	11.3353	5.12626	0.000226487	0.00311374	-0.168628	PG1_GMTP-WT_GMTP
ENSMUSG00000114536.1	Gm48837	1.33101	-0.134593	5.12559	0.000226744	0.00311536	0.742936	PG1_GMTP-WT_GMTP
ENSMUSG00000031004.8	Mki67	0.751004	5.5035	5.12355	0.000227528	0.00312309	-0.0801244	PG1_GMTP-WT_GMTP
ENSMUSG00000024174.9	Pot1b	0.387077	4.6901	5.1234	0.000227587	0.00312309	-0.0211856	PG1_GMTP-WT_GMTP
ENSMUSG00000023072.14	Cep89	0.601228	2.93589	5.12286	0.000227796	0.00312404	0.234737	PG1_GMTP-WT_GMTP
ENSMUSG00000017146.12	Brca1	0.432817	3.2022	5.12223	0.000228039	0.00312546	0.184795	PG1_GMTP-WT_GMTP
ENSMUSG00000038264.8	Sema7a	-1.37742	-0.172022	-5.12078	0.000228602	0.00312991	0.739336	PG1_GMTP-WT_GMTP
ENSMUSG00000059714.13	Flot1	-0.410705	5.74419	-5.12067	0.000228645	0.00312991	-0.0979473	PG1_GMTP-WT_GMTP
ENSMUSG00000029249.15	Rest	-0.320661	5.578	-5.11761	0.00022983	0.00314421	-0.0947128	PG1_GMTP-WT_GMTP
ENSMUSG00000021242.9	Npc2	0.246177	11.3025	5.11556	0.000230633	0.00315325	-0.187723	PG1_GMTP-WT_GMTP
ENSMUSG00000031447.7	Lamp1	0.260139	10.835	5.11338	0.000231487	0.003163	-0.193726	PG1_GMTP-WT_GMTP
ENSMUSG00000015709.9	Arnt2	1.4067	-0.432018	5.11215	0.000231971	0.00316685	0.754714	PG1_GMTP-WT_GMTP
ENSMUSG00000051606.5	2010001K21Rik	1.98989	-1.16108	5.11194	0.000232053	0.00316685	0.81865	PG1_GMTP-WT_GMTP
ENSMUSG00000032737.13	Inppl1	0.252705	8.12645	5.11103	0.00023241	0.00316979	-0.185048	PG1_GMTP-WT_GMTP
ENSMUSG00000072596.4	Ear2	0.635451	1.64453	5.10725	0.000233905	0.00318822	0.444	PG1_GMTP-WT_GMTP
ENSMUSG00000020653.12	Klf11	0.49672	3.08897	5.10685	0.000234063	0.00318843	0.178355	PG1_GMTP-WT_GMTP
ENSMUSG00000072109.11	A530040E14Rik	-0.546412	2.87196	-5.10025	0.000236699	0.00322237	0.20691	PG1_GMTP-WT_GMTP
ENSMUSG00000004677.17	Myo9b	0.31533	8.52809	5.09786	0.00023766	0.00323349	-0.213635	PG1_GMTP-WT_GMTP
ENSMUSG00000107704.1	Gm36355	3.63233	-5.83821	5.09724	0.000237913	0.00323496	0.301773	PG1_GMTP-WT_GMTP
ENSMUSG00000029270.10	Dipk1a	0.346779	4.9113	5.09525	0.000238719	0.00324393	-0.0900755	PG1_GMTP-WT_GMTP
ENSMUSG00000048232.12	Fbxo10	0.420401	3.20489	5.08568	0.000242631	0.00329509	0.12009	PG1_GMTP-WT_GMTP
ENSMUSG00000001034.17	Mapk7	0.335711	5.64094	5.08107	0.000244541	0.003319	-0.162717	PG1_GMTP-WT_GMTP
ENSMUSG00000040557.14	Mettl27	0.527907	2.33956	5.07953	0.000245182	0.00332568	0.270741	PG1_GMTP-WT_GMTP
ENSMUSG00000026649.14	Cfap126	1.33645	0.857248	5.07328	0.000247801	0.00335505	0.514173	PG1_GMTP-WT_GMTP
ENSMUSG00000029490.4	Mfsd7a	-0.505394	4.28212	-5.07306	0.000247891	0.00335505	-0.066657	PG1_GMTP-WT_GMTP
ENSMUSG00000004263.15	Atn1	-0.562325	2.75091	-5.07277	0.000248016	0.00335505	0.181409	PG1_GMTP-WT_GMTP
ENSMUSG00000018547.8	Pip4k2b	-0.31611	6.40343	-5.07258	0.000248095	0.00335505	-0.210726	PG1_GMTP-WT_GMTP
ENSMUSG00000060591.9	Ifitm2	-0.441414	6.06433	-5.07242	0.000248162	0.00335505	-0.197898	PG1_GMTP-WT_GMTP
ENSMUSG00000105843.1	Gm19439	0.981642	-0.546116	5.07205	0.000248319	0.00335505	0.699685	PG1_GMTP-WT_GMTP
ENSMUSG00000064120.14	Mocs1	-0.283114	5.89189	-5.07186	0.0002484	0.00335505	-0.19134	PG1_GMTP-WT_GMTP
ENSMUSG00000006920.14	Ezh1	0.237013	6.45798	5.06794	0.000250061	0.00337545	-0.220884	PG1_GMTP-WT_GMTP
ENSMUSG00000017697.3	Ada	0.839293	1.4622	5.06729	0.000250339	0.00337592	0.405725	PG1_GMTP-WT_GMTP
ENSMUSG00000033540.18	Idua	0.246779	6.06808	5.06692	0.000250497	0.00337592	-0.207804	PG1_GMTP-WT_GMTP
ENSMUSG00000026222.16	Sp100	0.265852	7.81796	5.06679	0.00025055	0.00337592	-0.258256	PG1_GMTP-WT_GMTP
ENSMUSG00000020053.18	Igf1	0.315794	8.7004	5.06352	0.000251948	0.00339271	-0.276313	PG1_GMTP-WT_GMTP
ENSMUSG00000025089.15	Gfra1	-3.92288	-4.91034	-5.06154	0.000252802	0.00340065	0.43658	PG1_GMTP-WT_GMTP
ENSMUSG00000081406.4	Rps6-ps4	-0.4491	2.84296	-5.06144	0.000252842	0.00340065	0.144099	PG1_GMTP-WT_GMTP
ENSMUSG00000044783.16	Hjurp	0.370457	5.43824	5.06053	0.000253234	0.00340387	-0.187843	PG1_GMTP-WT_GMTP
ENSMUSG00000090799.2	Klhl33	1.85298	-1.67632	5.05908	0.00025386	0.00341023	0.757824	PG1_GMTP-WT_GMTP
ENSMUSG00000110618.1	Gm39822	3.14013	-3.00601	5.05807	0.000254297	0.00341404	0.723576	PG1_GMTP-WT_GMTP
ENSMUSG00000056091.12	St3gal5	0.311333	6.17469	5.05521	0.000255541	0.00342867	-0.232868	PG1_GMTP-WT_GMTP
ENSMUSG00000027878.11	Notch2	0.584789	7.50863	5.05396	0.000256086	0.00343392	-0.274853	PG1_GMTP-WT_GMTP
ENSMUSG00000039725.6	Trp53rka	-0.391355	4.13395	-5.05334	0.000256356	0.00343548	-0.0832531	PG1_GMTP-WT_GMTP
ENSMUSG00000067847.13	Romo1	-0.432529	4.08513	-5.0512	0.000257291	0.00344593	-0.0805283	PG1_GMTP-WT_GMTP
ENSMUSG00000052609.9	Plekhg3	0.308952	5.61727	5.04908	0.000258225	0.00345458	-0.218102	PG1_GMTP-WT_GMTP
ENSMUSG00000004071.13	Cdip1	0.26006	5.12738	5.04903	0.000258246	0.00345458	-0.188106	PG1_GMTP-WT_GMTP
ENSMUSG00000019806.13	Aig1	-0.315233	4.76181	-5.0443	0.000260337	0.00348046	-0.167707	PG1_GMTP-WT_GMTP
ENSMUSG00000028873.16	Cdca8	0.426116	3.68482	5.04297	0.000260929	0.00348629	-0.0371759	PG1_GMTP-WT_GMTP
ENSMUSG00000010663.5	Fads1	-0.222703	6.92269	-5.04187	0.000261416	0.00349071	-0.281781	PG1_GMTP-WT_GMTP
ENSMUSG00000036943.9	Rab8b	0.332313	9.39799	5.04103	0.000261791	0.00349362	-0.321327	PG1_GMTP-WT_GMTP
ENSMUSG00000026202.13	Tuba4a	-0.415479	4.32113	-5.04007	0.000262219	0.00349606	-0.129757	PG1_GMTP-WT_GMTP
ENSMUSG00000028410.13	Dnaja1	-0.261875	7.42878	-5.03964	0.000262413	0.00349606	-0.298539	PG1_GMTP-WT_GMTP
ENSMUSG00000079037.9	Prnp	-0.255886	5.50021	-5.03924	0.000262595	0.00349606	-0.229094	PG1_GMTP-WT_GMTP
ENSMUSG00000032115.14	Hyou1	-0.271308	7.08854	-5.03899	0.000262703	0.00349606	-0.291379	PG1_GMTP-WT_GMTP
ENSMUSG00000061852.9	Gm7582	-3.45307	-5.292	-5.03887	0.000262757	0.00349606	0.337422	PG1_GMTP-WT_GMTP
ENSMUSG00000074281.3	Gm12522	1.58975	-3.36659	5.03693	0.000263629	0.00350362	0.652691	PG1_GMTP-WT_GMTP
ENSMUSG00000028549.17	Itgb3bp	1.19343	0.0142326	5.03691	0.000263639	0.00350362	0.573642	PG1_GMTP-WT_GMTP
ENSMUSG00000038147.13	Cd84	0.241713	9.77394	5.03564	0.000264213	0.00350915	-0.332262	PG1_GMTP-WT_GMTP
ENSMUSG00000070822.5	Zscan18	0.930216	-0.0697283	5.03503	0.000264485	0.00351068	0.581405	PG1_GMTP-WT_GMTP
ENSMUSG00000032402.12	Smad3	0.321237	4.06635	5.03283	0.00026548	0.00352053	-0.110469	PG1_GMTP-WT_GMTP
ENSMUSG00000026664.7	Phyh	0.249495	5.55619	5.03269	0.000265543	0.00352053	-0.243796	PG1_GMTP-WT_GMTP
ENSMUSG00000047875.6	Gpr157	0.302113	5.21861	5.03171	0.00026599	0.00352436	-0.225256	PG1_GMTP-WT_GMTP
ENSMUSG00000040747.9	Cd53	0.300774	8.90988	5.03075	0.000266425	0.00352652	-0.336415	PG1_GMTP-WT_GMTP
ENSMUSG00000032783.9	Troap	0.979113	0.793302	5.03065	0.000266468	0.00352652	0.450565	PG1_GMTP-WT_GMTP
ENSMUSG00000032575.16	Manf	-0.314625	5.42789	-5.02695	0.00026816	0.0035468	-0.2468	PG1_GMTP-WT_GMTP
ENSMUSG00000027522.15	Stx16	0.282196	6.37374	5.02542	0.000268859	0.00355394	-0.293326	PG1_GMTP-WT_GMTP
ENSMUSG00000073968.4	Trim68	0.507006	2.40355	5.02248	0.000270215	0.00356975	0.158637	PG1_GMTP-WT_GMTP
ENSMUSG00000006127.9	Inpp5k	0.265922	6.11514	5.01991	0.000271404	0.00358333	-0.293186	PG1_GMTP-WT_GMTP
ENSMUSG00000067714.13	Lpar5	0.360829	4.80186	5.01659	0.000272948	0.00360159	-0.220454	PG1_GMTP-WT_GMTP
ENSMUSG00000029456.12	Acad10	0.450374	2.93079	5.01496	0.000273706	0.00360873	0.0459219	PG1_GMTP-WT_GMTP
ENSMUSG00000102715.1	Gm6209	0.843797	1.72814	5.01474	0.000273813	0.00360873	0.268135	PG1_GMTP-WT_GMTP
ENSMUSG00000063480.8	Snu13	-0.341624	4.91298	-5.0103	0.000275895	0.00363245	-0.240682	PG1_GMTP-WT_GMTP
ENSMUSG00000037148.8	Arhgap10	0.22446	6.86116	5.01021	0.000275938	0.00363245	-0.33625	PG1_GMTP-WT_GMTP
ENSMUSG00000022146.12	Osmr	-2.5613	-2.38295	-5.00927	0.000276383	0.00363427	0.682569	PG1_GMTP-WT_GMTP
ENSMUSG00000023106.15	Denr	-0.322473	5.55747	-5.00923	0.000276402	0.00363427	-0.28555	PG1_GMTP-WT_GMTP
ENSMUSG00000021930.14	Spryd7	-0.34497	5.36365	-5.00696	0.000277479	0.00364628	-0.278384	PG1_GMTP-WT_GMTP
ENSMUSG00000037992.16	Rara	0.479982	4.24281	5.00531	0.000278259	0.00365268	-0.181828	PG1_GMTP-WT_GMTP
ENSMUSG00000033863.2	Klf9	0.439119	4.49429	5.005	0.000278411	0.00365268	-0.211155	PG1_GMTP-WT_GMTP
ENSMUSG00000039217.13	Il18	0.441577	2.74544	5.0049	0.000278457	0.00365268	0.0629506	PG1_GMTP-WT_GMTP
ENSMUSG00000031652.11	N4bp1	-0.335226	6.38146	-5.00422	0.000278782	0.00365389	-0.331307	PG1_GMTP-WT_GMTP
ENSMUSG00000029372.7	Ppbp	2.47476	-1.07433	5.00402	0.000278877	0.00365389	0.634389	PG1_GMTP-WT_GMTP
ENSMUSG00000031144.15	Syp	0.545307	1.77838	5.00108	0.000280281	0.00367014	0.235376	PG1_GMTP-WT_GMTP
ENSMUSG00000052298.12	Cdc42se2	0.212475	8.14555	4.99949	0.000281047	0.00367625	-0.38321	PG1_GMTP-WT_GMTP
ENSMUSG00000002844.9	Adprh	-0.328618	6.24475	-4.99942	0.000281078	0.00367625	-0.334733	PG1_GMTP-WT_GMTP
ENSMUSG00000030609.18	Aen	-0.32278	4.05411	-4.99759	0.000281961	0.00368564	-0.171281	PG1_GMTP-WT_GMTP
ENSMUSG00000003518.13	Dusp3	0.248448	7.941	4.99716	0.000282169	0.0036862	-0.384109	PG1_GMTP-WT_GMTP
ENSMUSG00000037503.12	Fam168b	0.221013	8.04733	4.99634	0.000282563	0.00368919	-0.387331	PG1_GMTP-WT_GMTP
ENSMUSG00000050232.6	Cxcr3	0.70975	2.24243	4.99554	0.000282951	0.00369048	0.141399	PG1_GMTP-WT_GMTP
ENSMUSG00000021360.16	Gcnt2	-1.16643	1.15678	-4.99546	0.000282992	0.00369048	0.33162	PG1_GMTP-WT_GMTP
ENSMUSG00000042804.13	Gpr153	-2.46755	-3.26681	-4.99406	0.000283669	0.00369714	0.601619	PG1_GMTP-WT_GMTP
ENSMUSG00000072082.7	Ccnf	0.514849	3.01279	4.99068	0.000285314	0.00371642	-0.0123644	PG1_GMTP-WT_GMTP
ENSMUSG00000039062.15	Anpep	0.293574	10.908	4.99024	0.000285529	0.00371704	-0.411988	PG1_GMTP-WT_GMTP
ENSMUSG00000004460.17	Dnajb11	-0.242363	7.04014	-4.98885	0.000286212	0.00372376	-0.379294	PG1_GMTP-WT_GMTP
ENSMUSG00000036777.8	Anln	0.668321	3.28946	4.98617	0.000287528	0.00373871	-0.0709307	PG1_GMTP-WT_GMTP
ENSMUSG00000048706.3	Lurap1l	-2.12644	-2.23668	-4.98516	0.000288028	0.00374302	0.646649	PG1_GMTP-WT_GMTP
ENSMUSG00000024143.15	Rhoq	-0.348495	5.80959	-4.98364	0.000288778	0.00375058	-0.344093	PG1_GMTP-WT_GMTP
ENSMUSG00000022283.15	Pabpc1	-0.223044	9.81536	-4.9804	0.000290383	0.00376737	-0.430659	PG1_GMTP-WT_GMTP
ENSMUSG00000028156.12	Eif4e	-0.320714	5.69293	-4.98035	0.000290408	0.00376737	-0.344208	PG1_GMTP-WT_GMTP
ENSMUSG00000041607.17	Mbp	0.270147	6.538	4.97821	0.000291479	0.00377906	-0.383139	PG1_GMTP-WT_GMTP
ENSMUSG00000021614.16	Vcan	-0.927898	1.63785	-4.97727	0.000291945	0.00378291	0.218388	PG1_GMTP-WT_GMTP
ENSMUSG00000086032.1	Gm15929	-3.34885	-6.87417	-4.9761	0.000292535	0.00378835	-0.0515042	PG1_GMTP-WT_GMTP
ENSMUSG00000020189.15	Osbpl8	0.416834	9.5587	4.97424	0.000293465	0.00379819	-0.440922	PG1_GMTP-WT_GMTP
ENSMUSG00000090035.3	Galnt4	0.320236	5.11198	4.97216	0.000294518	0.00380961	-0.323616	PG1_GMTP-WT_GMTP
ENSMUSG00000002814.15	Top3a	0.310326	4.95457	4.97053	0.00029534	0.00381803	-0.314842	PG1_GMTP-WT_GMTP
ENSMUSG00000033319.5	Fem1c	0.332371	6.53779	4.96974	0.000295739	0.00382098	-0.398225	PG1_GMTP-WT_GMTP
ENSMUSG00000023992.14	Trem2	0.287671	9.7818	4.96918	0.000296024	0.00382244	-0.450619	PG1_GMTP-WT_GMTP
ENSMUSG00000106365.1	Gm43568	1.76388	-2.88746	4.96478	0.000298269	0.00384882	0.591453	PG1_GMTP-WT_GMTP
ENSMUSG00000039410.16	Prdm16	0.731701	1.31686	4.96437	0.000298478	0.00384882	0.25078	PG1_GMTP-WT_GMTP
ENSMUSG00000072568.4	Lratd2	0.35551	5.21076	4.96416	0.000298584	0.00384882	-0.344876	PG1_GMTP-WT_GMTP
ENSMUSG00000073676.4	Hspe1	-0.36318	5.99147	-4.96374	0.000298803	0.00384941	-0.387889	PG1_GMTP-WT_GMTP
ENSMUSG00000023118.15	Sympk	-0.283436	6.92834	-4.96266	0.000299357	0.00385433	-0.422953	PG1_GMTP-WT_GMTP
ENSMUSG00000070047.14	Fat1	-1.31951	0.415506	-4.96006	0.000300695	0.00386932	0.385591	PG1_GMTP-WT_GMTP
ENSMUSG00000033717.6	Adra2a	-4.64363	-3.13165	-4.95963	0.000300917	0.00386936	0.564056	PG1_GMTP-WT_GMTP
ENSMUSG00000039703.15	Nploc4	-0.224579	6.51262	-4.95906	0.00030121	0.00386936	-0.416425	PG1_GMTP-WT_GMTP
ENSMUSG00000061751.16	Kalrn	-1.48814	-1.59565	-4.95905	0.000301218	0.00386936	0.592139	PG1_GMTP-WT_GMTP
ENSMUSG00000058624.13	Gda	-0.459903	4.4507	-4.95804	0.00030174	0.00387383	-0.289963	PG1_GMTP-WT_GMTP
ENSMUSG00000042712.10	Tceal9	0.301511	5.65474	4.9577	0.000301914	0.00387384	-0.38264	PG1_GMTP-WT_GMTP
ENSMUSG00000037971.10	1110032A03Rik	0.443785	3.43597	4.95494	0.000303351	0.00389003	-0.152152	PG1_GMTP-WT_GMTP
ENSMUSG00000117234.1	Gm7818	-1.29596	-0.502652	-4.95316	0.00030428	0.00389971	0.494516	PG1_GMTP-WT_GMTP
ENSMUSG00000075232.6	Amd1	-0.306358	5.4019	-4.95167	0.000305057	0.00390742	-0.379242	PG1_GMTP-WT_GMTP
ENSMUSG00000061130.13	Ppm1b	-0.252396	5.74323	-4.95088	0.000305473	0.00391051	-0.399251	PG1_GMTP-WT_GMTP
ENSMUSG00000035863.14	Palm	0.534623	2.56363	4.95021	0.000305825	0.00391277	0.00078453	PG1_GMTP-WT_GMTP
ENSMUSG00000015968.18	Cacna1d	0.530143	4.54793	4.94902	0.00030645	0.00391853	-0.316532	PG1_GMTP-WT_GMTP
ENSMUSG00000025268.15	Maged2	-0.284993	4.48049	-4.94622	0.000307927	0.00393515	-0.314266	PG1_GMTP-WT_GMTP
ENSMUSG00000025583.15	Rptor	0.334491	6.34485	4.94557	0.000308271	0.00393577	-0.434573	PG1_GMTP-WT_GMTP
ENSMUSG00000021624.9	Cd180	0.3117	8.964	4.94546	0.000308328	0.00393577	-0.48887	PG1_GMTP-WT_GMTP
ENSMUSG00000036894.3	Rap2b	-0.29595	6.64153	-4.94464	0.000308762	0.00393616	-0.44641	PG1_GMTP-WT_GMTP
ENSMUSG00000034041.5	Lyl1	0.366588	5.95343	4.94463	0.000308772	0.00393616	-0.420333	PG1_GMTP-WT_GMTP
ENSMUSG00000021809.10	Nudt13	0.290598	4.4667	4.94441	0.000308888	0.00393616	-0.316001	PG1_GMTP-WT_GMTP
ENSMUSG00000015759.11	Cnih1	-0.311651	5.26768	-4.93904	0.000311752	0.00396819	-0.393425	PG1_GMTP-WT_GMTP
ENSMUSG00000021071.17	Trim9	3.39968	-6.85192	4.93903	0.000311757	0.00396819	-0.0889565	PG1_GMTP-WT_GMTP
ENSMUSG00000020021.4	Fgd6	0.532878	6.54426	4.93708	0.000312804	0.00397924	-0.456774	PG1_GMTP-WT_GMTP
ENSMUSG00000028668.5	Eloa	0.249845	6.96868	4.93622	0.000313267	0.00398204	-0.471324	PG1_GMTP-WT_GMTP
ENSMUSG00000020728.17	Cep112	0.983943	-0.00928074	4.93601	0.000313381	0.00398204	0.404165	PG1_GMTP-WT_GMTP
ENSMUSG00000087259.7	2610035D17Rik	0.507961	2.41359	4.93558	0.000313611	0.0039827	0.00343247	PG1_GMTP-WT_GMTP
ENSMUSG00000030530.15	Furin	-0.256852	6.97161	-4.93386	0.000314539	0.00399221	-0.47562	PG1_GMTP-WT_GMTP
ENSMUSG00000030268.17	Bcat1	-2.09182	-2.21263	-4.93289	0.000315068	0.00399665	0.563635	PG1_GMTP-WT_GMTP
ENSMUSG00000045672.15	Col27a1	-1.7372	-2.23557	-4.9289	0.000317237	0.00401768	0.557238	PG1_GMTP-WT_GMTP
ENSMUSG00000028211.11	Trp53inp1	0.351098	5.81703	4.92866	0.000317367	0.00401768	-0.442586	PG1_GMTP-WT_GMTP
ENSMUSG00000036667.14	Tcaf1	-0.831956	1.17186	-4.9286	0.000317402	0.00401768	0.212412	PG1_GMTP-WT_GMTP
ENSMUSG00000024393.14	Prrc2a	-0.275551	8.16886	-4.92851	0.000317446	0.00401768	-0.510259	PG1_GMTP-WT_GMTP
ENSMUSG00000038252.13	Ncapd2	0.5466	4.20445	4.92454	0.000319625	0.00404297	-0.320923	PG1_GMTP-WT_GMTP
ENSMUSG00000028214.13	Gem	-1.49459	-0.379763	-4.92405	0.000319897	0.00404407	0.430817	PG1_GMTP-WT_GMTP
ENSMUSG00000016559.14	H3f3b	-0.254363	8.80674	-4.92372	0.000320075	0.00404407	-0.526401	PG1_GMTP-WT_GMTP
ENSMUSG00000000876.11	Pxmp4	0.28307	4.30235	4.92208	0.00032098	0.00405321	-0.337365	PG1_GMTP-WT_GMTP
ENSMUSG00000030187.15	Klra2	-0.90056	0.837258	-4.91673	0.000323954	0.00408845	0.245797	PG1_GMTP-WT_GMTP
ENSMUSG00000090231.10	Cfb	-0.846798	1.89239	-4.91448	0.000325211	0.004102	0.062737	PG1_GMTP-WT_GMTP
ENSMUSG00000075514.4	Gm13375	-0.955013	1.25194	-4.91255	0.000326293	0.00411332	0.170948	PG1_GMTP-WT_GMTP
ENSMUSG00000024164.15	C3	-0.418505	9.02234	-4.91047	0.000327465	0.00412576	-0.551941	PG1_GMTP-WT_GMTP
ENSMUSG00000020358.17	Hnrnpab	-0.265279	7.45242	-4.90981	0.000327838	0.00412813	-0.53063	PG1_GMTP-WT_GMTP
ENSMUSG00000085586.1	Gm11613	-0.768259	2.33794	-4.90934	0.000328102	0.00412913	-0.0287159	PG1_GMTP-WT_GMTP
ENSMUSG00000023021.15	Cers5	-0.236774	6.15016	-4.9082	0.000328746	0.00413258	-0.49386	PG1_GMTP-WT_GMTP
ENSMUSG00000026220.6	Slc16a14	1.18062	-0.201115	4.9082	0.000328747	0.00413258	0.381611	PG1_GMTP-WT_GMTP
ENSMUSG00000062867.13	Impdh2	-0.359495	5.65832	-4.90682	0.000329531	0.00414011	-0.473777	PG1_GMTP-WT_GMTP
ENSMUSG00000025016.11	Tm9sf3	-0.241716	8.27543	-4.90639	0.000329778	0.00414088	-0.551433	PG1_GMTP-WT_GMTP
ENSMUSG00000025986.6	Slc39a10	0.365756	6.46798	4.90474	0.000330717	0.00415033	-0.512011	PG1_GMTP-WT_GMTP
ENSMUSG00000028633.7	Ctps	-0.789615	1.5689	-4.90007	0.000333391	0.00418153	0.0947027	PG1_GMTP-WT_GMTP
ENSMUSG00000042213.17	Zfand4	0.517042	1.71696	4.89944	0.000333752	0.00418371	0.0675326	PG1_GMTP-WT_GMTP
ENSMUSG00000060128.5	Gm2710	-3.2269	-6.09442	-4.89295	0.000337511	0.00422846	0.00490136	PG1_GMTP-WT_GMTP
ENSMUSG00000114863.1	Gm48824	4.14935	-6.13903	4.89101	0.000338639	0.00424021	-0.00589442	PG1_GMTP-WT_GMTP
ENSMUSG00000029428.13	Stx2	-0.245058	6.58278	-4.88991	0.000339284	0.00424426	-0.542489	PG1_GMTP-WT_GMTP
ENSMUSG00000044813.15	Shb	-0.449329	2.91631	-4.88981	0.000339343	0.00424426	-0.173308	PG1_GMTP-WT_GMTP
ENSMUSG00000084347.3	Akt2-ps	1.20313	-0.883047	4.88891	0.000339869	0.00424846	0.425273	PG1_GMTP-WT_GMTP
ENSMUSG00000043065.12	Spice1	0.48423	3.66078	4.88736	0.000340782	0.00425749	-0.30993	PG1_GMTP-WT_GMTP
ENSMUSG00000079243.4	Xirp1	-4.8239	-6.10296	-4.88408	0.000342717	0.00427926	-0.00746767	PG1_GMTP-WT_GMTP
ENSMUSG00000021403.3	Serpinb9b	1.69038	-0.862967	4.88332	0.000343168	0.00428082	0.413909	PG1_GMTP-WT_GMTP
ENSMUSG00000079435.9	Rpl36a	-0.246498	7.00341	-4.88322	0.000343225	0.00428082	-0.567202	PG1_GMTP-WT_GMTP
ENSMUSG00000031779.3	Ccl22	-2.66278	0.10435	-4.88089	0.000344611	0.00429514	0.293661	PG1_GMTP-WT_GMTP
ENSMUSG00000085208.3	Brip1os	-0.248177	5.79915	-4.88056	0.000344805	0.00429514	-0.527845	PG1_GMTP-WT_GMTP
ENSMUSG00000018848.4	Rars	-0.296179	6.20266	-4.88032	0.000344951	0.00429514	-0.545924	PG1_GMTP-WT_GMTP
ENSMUSG00000050439.7	Enthd1	1.93817	-2.45796	4.87946	0.000345461	0.00429909	0.476498	PG1_GMTP-WT_GMTP
ENSMUSG00000111792.1	Gm33858	-4.49329	-5.48176	-4.87392	0.000348782	0.004338	0.0937488	PG1_GMTP-WT_GMTP
ENSMUSG00000070369.13	Itgad	0.649657	2.03412	4.8736	0.000348978	0.00433802	-0.0353905	PG1_GMTP-WT_GMTP
ENSMUSG00000029447.11	Cct6a	-0.262488	6.52881	-4.86769	0.000352558	0.00438009	-0.58058	PG1_GMTP-WT_GMTP
ENSMUSG00000029863.13	Casp2	0.289845	5.0195	4.865	0.000354206	0.00439811	-0.508588	PG1_GMTP-WT_GMTP
ENSMUSG00000090000.2	Ier3ip1	-0.301022	4.21239	-4.86439	0.00035458	0.0044003	-0.429495	PG1_GMTP-WT_GMTP
ENSMUSG00000039633.7	Lonrf1	-0.456862	3.12263	-4.86349	0.000355133	0.00440472	-0.258718	PG1_GMTP-WT_GMTP
ENSMUSG00000021876.15	Rnase4	0.383304	4.48259	4.86269	0.00035562	0.00440631	-0.463881	PG1_GMTP-WT_GMTP
ENSMUSG00000006235.6	Epor	1.13801	0.477238	4.86264	0.000355656	0.00440631	0.207352	PG1_GMTP-WT_GMTP
ENSMUSG00000030322.12	Mbd4	0.386118	3.244	4.86218	0.000355936	0.00440732	-0.283393	PG1_GMTP-WT_GMTP
ENSMUSG00000026103.14	Gls	-0.307986	6.78812	-4.85995	0.000357311	0.00442189	-0.602796	PG1_GMTP-WT_GMTP
ENSMUSG00000049625.6	Tifab	0.206583	7.41978	4.85872	0.000358073	0.00442887	-0.621606	PG1_GMTP-WT_GMTP
ENSMUSG00000028124.15	Gclm	-0.301291	5.3609	-4.85816	0.00035842	0.0044307	-0.544109	PG1_GMTP-WT_GMTP
ENSMUSG00000034156.16	Tspoap1	1.08599	-0.595226	4.85459	0.000360643	0.00445293	0.337285	PG1_GMTP-WT_GMTP
ENSMUSG00000015947.10	Fcgr1	0.237507	9.2285	4.85424	0.000360857	0.00445293	-0.654279	PG1_GMTP-WT_GMTP
ENSMUSG00000038520.15	Tbc1d17	0.303811	5.87609	4.854	0.000361009	0.00445293	-0.579251	PG1_GMTP-WT_GMTP
ENSMUSG00000020806.15	Rhbdf2	-0.297639	5.9008	-4.85399	0.000361016	0.00445293	-0.580413	PG1_GMTP-WT_GMTP
ENSMUSG00000015880.13	Ncapg	0.670394	2.1918	4.85315	0.000361544	0.00445698	-0.101045	PG1_GMTP-WT_GMTP
ENSMUSG00000039232.12	Stx11	-0.483313	3.47577	-4.85028	0.000363344	0.0044767	-0.345802	PG1_GMTP-WT_GMTP
ENSMUSG00000096606.2	Tpbgl	1.14291	-0.280113	4.84839	0.000364532	0.00448886	0.289066	PG1_GMTP-WT_GMTP
ENSMUSG00000021728.8	Emb	0.243046	7.80247	4.84791	0.000364839	0.00449016	-0.648881	PG1_GMTP-WT_GMTP
ENSMUSG00000024885.9	Aldh3b1	0.279091	7.02444	4.8473	0.000365223	0.0044924	-0.632299	PG1_GMTP-WT_GMTP
ENSMUSG00000110105.1	Gm45844	-2.54219	-2.9118	-4.84657	0.000365681	0.00449556	0.408167	PG1_GMTP-WT_GMTP
ENSMUSG00000027253.15	Lrp4	0.387572	4.55835	4.84162	0.000368832	0.0045318	-0.509849	PG1_GMTP-WT_GMTP
ENSMUSG00000068744.12	Psrc1	0.616093	2.23247	4.83835	0.000370926	0.00455344	-0.134937	PG1_GMTP-WT_GMTP
ENSMUSG00000023206.16	Il15ra	-0.614725	2.409	-4.83824	0.000371002	0.00455344	-0.168556	PG1_GMTP-WT_GMTP
ENSMUSG00000047759.6	Hs3st3a1	4.21371	-4.89919	4.83444	0.00037345	0.00458097	0.139697	PG1_GMTP-WT_GMTP
ENSMUSG00000020674.17	Pxdn	-1.6435	-1.06048	-4.83349	0.000374065	0.00458599	0.348025	PG1_GMTP-WT_GMTP
ENSMUSG00000022836.11	Mylk	-0.832595	-0.73321	-4.83236	0.000374798	0.00459246	0.314458	PG1_GMTP-WT_GMTP
ENSMUSG00000052727.6	Map1b	-1.41447	-1.58552	-4.83199	0.00037504	0.0045929	0.382619	PG1_GMTP-WT_GMTP
ENSMUSG00000039824.4	Myl6b	0.789658	0.8105	4.83025	0.000376172	0.00460253	0.098789	PG1_GMTP-WT_GMTP
ENSMUSG00000041135.15	Ripk2	-0.279528	3.93715	-4.83015	0.000376239	0.00460253	-0.454196	PG1_GMTP-WT_GMTP
ENSMUSG00000063888.7	Rpl7l1	-0.22137	6.89552	-4.82834	0.000377418	0.00461443	-0.662813	PG1_GMTP-WT_GMTP
ENSMUSG00000033644.5	Piwil2	-0.90429	0.19755	-4.82707	0.000378255	0.00462213	0.187012	PG1_GMTP-WT_GMTP
ENSMUSG00000039116.7	Adgrg6	-0.397623	4.68537	-4.82622	0.000378812	0.00462639	-0.549846	PG1_GMTP-WT_GMTP
ENSMUSG00000042272.17	Sestd1	0.28851	6.4497	4.82275	0.0003811	0.00465179	-0.658647	PG1_GMTP-WT_GMTP
ENSMUSG00000061576.15	Dpp6	4.45812	-5.42926	4.82071	0.000382448	0.00466569	0.0346576	PG1_GMTP-WT_GMTP
ENSMUSG00000027326.13	Knl1	0.751237	2.21362	4.81314	0.000387511	0.00472488	-0.176329	PG1_GMTP-WT_GMTP
ENSMUSG00000032369.13	Plscr1	-0.273205	4.6395	-4.80945	0.00039	0.00475263	-0.575645	PG1_GMTP-WT_GMTP
ENSMUSG00000052485.7	Tmem171	0.387852	4.34439	4.80693	0.000391709	0.00476921	-0.548834	PG1_GMTP-WT_GMTP
ENSMUSG00000053746.8	Ptrh1	-0.416545	2.99397	-4.80682	0.000391788	0.00476921	-0.33622	PG1_GMTP-WT_GMTP
ENSMUSG00000038122.9	Tbc1d32	0.432274	3.75894	4.80088	0.000395849	0.00481602	-0.480166	PG1_GMTP-WT_GMTP
ENSMUSG00000032309.15	Fbxo22	-0.277826	4.92717	-4.79561	0.00039949	0.00485767	-0.626086	PG1_GMTP-WT_GMTP
ENSMUSG00000006411.12	Nectin4	0.273009	5.02544	4.79459	0.000400199	0.00486364	-0.635674	PG1_GMTP-WT_GMTP
ENSMUSG00000041782.14	Lad1	-3.26042	-2.34044	-4.79374	0.000400793	0.00486821	0.340846	PG1_GMTP-WT_GMTP
ENSMUSG00000037410.13	Tbc1d2b	0.305878	7.05545	4.78739	0.000405242	0.00491924	-0.741088	PG1_GMTP-WT_GMTP
ENSMUSG00000032089.16	Il10ra	0.241241	7.61836	4.78712	0.000405435	0.00491924	-0.754894	PG1_GMTP-WT_GMTP
ENSMUSG00000040264.10	Gbp2b	1.78841	0.117783	4.78423	0.000407475	0.0049413	0.124076	PG1_GMTP-WT_GMTP
ENSMUSG00000037712.16	Fermt2	-1.88428	-0.98208	-4.78375	0.000407815	0.00494274	0.25684	PG1_GMTP-WT_GMTP
ENSMUSG00000024855.10	Pacs1	0.339392	5.38996	4.78214	0.000408962	0.00495394	-0.682802	PG1_GMTP-WT_GMTP
ENSMUSG00000021947.11	Cryl1	0.282767	4.6336	4.77611	0.000413275	0.00500348	-0.635157	PG1_GMTP-WT_GMTP
ENSMUSG00000037341.14	Slc9a7	0.729889	4.90915	4.77303	0.000415502	0.00502771	-0.665348	PG1_GMTP-WT_GMTP
ENSMUSG00000068854.7	H2bc21	0.59594	2.99015	4.77076	0.000417148	0.00504321	-0.400172	PG1_GMTP-WT_GMTP
ENSMUSG00000026974.11	Zmynd19	-0.472511	3.44468	-4.77064	0.000417235	0.00504321	-0.483295	PG1_GMTP-WT_GMTP
ENSMUSG00000054263.12	Lifr	0.574205	2.75621	4.76809	0.000419092	0.00506291	-0.360542	PG1_GMTP-WT_GMTP
ENSMUSG00000024896.9	Minpp1	-0.252634	4.72454	-4.76744	0.000419562	0.00506544	-0.6595	PG1_GMTP-WT_GMTP
ENSMUSG00000026203.16	Dnajb2	-0.393124	3.64044	-4.76718	0.000419755	0.00506544	-0.522216	PG1_GMTP-WT_GMTP
ENSMUSG00000028076.12	Cd1d1	0.394971	3.14698	4.76673	0.000420085	0.00506668	-0.436564	PG1_GMTP-WT_GMTP
ENSMUSG00000028175.15	Depdc1a	1.04625	0.0500659	4.76507	0.0004213	0.00507714	0.100367	PG1_GMTP-WT_GMTP
ENSMUSG00000039519.6	Cyp7b1	-4.77079	-6.1882	-4.76493	0.000421408	0.00507714	-0.168561	PG1_GMTP-WT_GMTP
ENSMUSG00000038173.15	Enpp6	2.08337	-1.12402	4.76379	0.000422242	0.00508445	0.235927	PG1_GMTP-WT_GMTP
ENSMUSG00000113019.1	Gm47467	1.13528	-0.697627	4.76339	0.000422538	0.00508526	0.192857	PG1_GMTP-WT_GMTP
ENSMUSG00000032911.6	Cspg4	-2.09209	-2.08169	-4.75919	0.000425641	0.00511964	0.281975	PG1_GMTP-WT_GMTP
ENSMUSG00000038489.8	Polr2l	-0.483715	3.26392	-4.7589	0.000425853	0.00511964	-0.472241	PG1_GMTP-WT_GMTP
ENSMUSG00000022744.12	Cldnd1	-0.321945	4.83602	-4.75704	0.000427242	0.00513358	-0.688241	PG1_GMTP-WT_GMTP
ENSMUSG00000024219.16	Anks1	0.258405	5.85767	4.75483	0.000428888	0.00514933	-0.757168	PG1_GMTP-WT_GMTP
ENSMUSG00000025537.12	Phkg1	-1.61011	-2.79878	-4.75449	0.000429142	0.00514933	0.270034	PG1_GMTP-WT_GMTP
ENSMUSG00000079685.10	Ulbp1	0.344615	4.89743	4.75435	0.000429245	0.00514933	-0.698111	PG1_GMTP-WT_GMTP
ENSMUSG00000024913.16	Lrp5	0.379154	5.49375	4.75387	0.000429608	0.00515092	-0.739952	PG1_GMTP-WT_GMTP
ENSMUSG00000030323.13	Ift122	0.36582	3.85744	4.75292	0.000430318	0.00515618	-0.581425	PG1_GMTP-WT_GMTP
ENSMUSG00000025794.9	Rpl14	-0.273513	8.09411	-4.7523	0.000430789	0.00515618	-0.82634	PG1_GMTP-WT_GMTP
ENSMUSG00000005732.14	Ranbp1	-0.471562	3.84158	-4.75218	0.000430878	0.00515618	-0.580358	PG1_GMTP-WT_GMTP
ENSMUSG00000105990.1	Gm43307	-3.34693	-5.0971	-4.75196	0.000431042	0.00515618	-0.00135072	PG1_GMTP-WT_GMTP
ENSMUSG00000014856.12	Tmem208	-0.354218	4.58561	-4.75134	0.00043151	0.00515618	-0.675285	PG1_GMTP-WT_GMTP
ENSMUSG00000032508.8	Myd88	-0.244574	6.41393	-4.75121	0.000431608	0.00515618	-0.786525	PG1_GMTP-WT_GMTP
ENSMUSG00000097328.7	Tnfsf12	0.375313	5.26208	4.75113	0.000431665	0.00515618	-0.730794	PG1_GMTP-WT_GMTP
ENSMUSG00000028894.18	Inpp5b	-0.314332	5.503	-4.75074	0.000431959	0.00515693	-0.746123	PG1_GMTP-WT_GMTP
ENSMUSG00000031097.15	Tnni2	1.1926	1.01509	4.74677	0.000434961	0.00518999	-0.0816838	PG1_GMTP-WT_GMTP
ENSMUSG00000048807.2	Slc35e4	-0.291036	4.91553	-4.74585	0.000435664	0.00519434	-0.714975	PG1_GMTP-WT_GMTP
ENSMUSG00000039067.5	Psmd7	-0.290974	6.07716	-4.74568	0.000435791	0.00519434	-0.783497	PG1_GMTP-WT_GMTP
ENSMUSG00000089931.1	Gm8459	1.54793	-1.55207	4.74437	0.000436784	0.00520244	0.235083	PG1_GMTP-WT_GMTP
ENSMUSG00000055320.18	Tead1	-1.29018	-1.1715	-4.74417	0.000436937	0.00520244	0.206864	PG1_GMTP-WT_GMTP
ENSMUSG00000017776.15	Crk	-0.23609	7.21684	-4.74332	0.00043759	0.00520744	-0.824977	PG1_GMTP-WT_GMTP
ENSMUSG00000085337.1	Gm15964	0.762058	0.405416	4.74301	0.000437823	0.00520744	0.00912761	PG1_GMTP-WT_GMTP
ENSMUSG00000017737.2	Mmp9	-0.460558	3.25643	-4.74241	0.000438281	0.00521011	-0.500567	PG1_GMTP-WT_GMTP
ENSMUSG00000039958.17	Etfbkmt	0.543306	1.57017	4.74152	0.000438967	0.00521282	-0.18638	PG1_GMTP-WT_GMTP
ENSMUSG00000033545.14	Znrf1	-0.262105	5.74441	-4.74151	0.000438976	0.00521282	-0.775711	PG1_GMTP-WT_GMTP
ENSMUSG00000035352.3	Ccl12	-1.90166	-1.19978	-4.74038	0.000439838	0.00521934	0.202848	PG1_GMTP-WT_GMTP
ENSMUSG00000076437.10	Selenoh	0.387407	2.74118	4.74018	0.000439994	0.00521934	-0.407749	PG1_GMTP-WT_GMTP
ENSMUSG00000023460.13	Rab12	-0.277675	6.13954	-4.73904	0.000440869	0.00522695	-0.798075	PG1_GMTP-WT_GMTP
ENSMUSG00000047539.9	Fbxo28	0.249137	5.90151	4.73443	0.000444432	0.00526391	-0.796132	PG1_GMTP-WT_GMTP
ENSMUSG00000038463.8	Olfml2b	-1.19093	0.000389918	-4.7344	0.000444459	0.00526391	0.0539447	PG1_GMTP-WT_GMTP
ENSMUSG00000063410.8	Stk24	0.230655	7.13362	4.73265	0.000445821	0.00527724	-0.842194	PG1_GMTP-WT_GMTP
ENSMUSG00000047415.12	Gpr68	0.304036	3.91116	4.72716	0.000450118	0.00532528	-0.635953	PG1_GMTP-WT_GMTP
ENSMUSG00000032666.16	1700025G04Rik	0.339234	4.4859	4.72333	0.000453139	0.00535818	-0.715332	PG1_GMTP-WT_GMTP
ENSMUSG00000041235.12	Chd7	-0.49382	4.03608	-4.72111	0.000454898	0.00537614	-0.664285	PG1_GMTP-WT_GMTP
ENSMUSG00000021003.10	Galc	0.204042	7.86274	4.72022	0.000455607	0.00538166	-0.880626	PG1_GMTP-WT_GMTP
ENSMUSG00000061119.7	Prcp	0.213491	7.46939	4.71924	0.000456388	0.00538803	-0.87454	PG1_GMTP-WT_GMTP
ENSMUSG00000054072.12	Iigp1	0.470524	4.02402	4.71848	0.000456994	0.00539234	-0.667368	PG1_GMTP-WT_GMTP
ENSMUSG00000107310.1	Gm7452	5.66412	-5.50296	4.71646	0.000458618	0.00540864	-0.112517	PG1_GMTP-WT_GMTP
ENSMUSG00000116480.1	Gm49512	3.72347	-6.69054	4.71471	0.000460022	0.00542233	-0.31946	PG1_GMTP-WT_GMTP
ENSMUSG00000050605.17	Zfp61	0.541404	3.19626	4.71024	0.000463635	0.00546115	-0.547449	PG1_GMTP-WT_GMTP
ENSMUSG00000038943.16	Prc1	0.595676	3.30241	4.71003	0.000463805	0.00546115	-0.56725	PG1_GMTP-WT_GMTP
ENSMUSG00000054027.8	Nt5dc3	0.237997	4.88308	4.70965	0.000464112	0.00546188	-0.777839	PG1_GMTP-WT_GMTP
ENSMUSG00000027035.10	Cers6	-0.411397	7.40849	-4.70881	0.00046479	0.00546697	-0.892121	PG1_GMTP-WT_GMTP
ENSMUSG00000080316.11	Spaca6	-0.721126	1.76233	-4.70821	0.000465284	0.0054699	-0.280312	PG1_GMTP-WT_GMTP
ENSMUSG00000039849.6	Pcif1	0.248653	5.46905	4.70644	0.000466727	0.00548398	-0.824476	PG1_GMTP-WT_GMTP
ENSMUSG00000031503.13	Col4a2	-1.25329	1.46771	-4.70263	0.00046985	0.00551777	-0.237571	PG1_GMTP-WT_GMTP
ENSMUSG00000044068.7	Zrsr1	0.306475	3.62511	4.69917	0.000472701	0.00554706	-0.642425	PG1_GMTP-WT_GMTP
ENSMUSG00000056019.12	Zfp709	0.47656	4.45759	4.699	0.000472841	0.00554706	-0.756287	PG1_GMTP-WT_GMTP
ENSMUSG00000021252.11	Erg28	-0.281707	4.20928	-4.69631	0.000475077	0.00557036	-0.732019	PG1_GMTP-WT_GMTP
ENSMUSG00000002365.10	Snx9	0.21204	7.11153	4.69547	0.000475776	0.00557562	-0.909046	PG1_GMTP-WT_GMTP
ENSMUSG00000020475.3	Pgam2	-0.727553	1.00201	-4.69183	0.000478823	0.00560838	-0.176918	PG1_GMTP-WT_GMTP
ENSMUSG00000051220.2	Ercc6l	0.433025	2.76257	4.69119	0.000479355	0.00561167	-0.50006	PG1_GMTP-WT_GMTP
ENSMUSG00000034724.18	Cnot6l	0.343256	6.87527	4.68973	0.000480584	0.00562311	-0.912946	PG1_GMTP-WT_GMTP
ENSMUSG00000044072.14	Eml6	0.605897	2.3811	4.68878	0.00048139	0.00562959	-0.43081	PG1_GMTP-WT_GMTP
ENSMUSG00000020895.14	Tmem107	0.651426	1.85925	4.68796	0.000482074	0.00563464	-0.334138	PG1_GMTP-WT_GMTP
ENSMUSG00000017858.12	Ift52	0.305273	5.40199	4.68673	0.000483115	0.00564384	-0.856254	PG1_GMTP-WT_GMTP
ENSMUSG00000046876.16	Atxn1	0.41079	4.53504	4.68509	0.000484509	0.00565717	-0.789959	PG1_GMTP-WT_GMTP
ENSMUSG00000026478.14	Lamc1	-0.470029	5.39222	-4.68369	0.000485701	0.00566527	-0.861185	PG1_GMTP-WT_GMTP
ENSMUSG00000042564.13	Fam227a	1.06431	-1.43542	4.68368	0.000485711	0.00566527	0.12553	PG1_GMTP-WT_GMTP
ENSMUSG00000097313.2	Gm26569	1.138	-0.0744535	4.6798	0.000489027	0.00570098	-0.0307605	PG1_GMTP-WT_GMTP
ENSMUSG00000038650.15	Rnh1	0.314803	9.04785	4.67942	0.000489349	0.00570175	-0.969274	PG1_GMTP-WT_GMTP
ENSMUSG00000020023.18	Tmcc3	0.368927	6.59732	4.67857	0.000490077	0.00570725	-0.924581	PG1_GMTP-WT_GMTP
ENSMUSG00000035960.14	Apex1	-0.321162	3.73475	-4.67708	0.000491359	0.0057192	-0.69996	PG1_GMTP-WT_GMTP
ENSMUSG00000024340.15	Btnl2	4.52734	-4.62979	4.67581	0.000492455	0.00572896	-0.0372147	PG1_GMTP-WT_GMTP
ENSMUSG00000081099.2	Gm5270	3.25724	-6.85267	4.67512	0.000493053	0.00573293	-0.395214	PG1_GMTP-WT_GMTP
ENSMUSG00000028708.16	Mknk1	0.217075	6.9447	4.67405	0.000493981	0.00574073	-0.943475	PG1_GMTP-WT_GMTP
ENSMUSG00000091119.2	Ccdc152	0.809907	0.0825154	4.67316	0.000494757	0.00574675	-0.0649383	PG1_GMTP-WT_GMTP
ENSMUSG00000072893.12	4933439C10Rik	0.609639	0.843695	4.67258	0.00049526	0.00574953	-0.184926	PG1_GMTP-WT_GMTP
ENSMUSG00000105889.1	Gm42776	1.94211	-2.51475	4.67229	0.000495512	0.00574953	0.145146	PG1_GMTP-WT_GMTP
ENSMUSG00000018001.18	Cyth3	0.23687	5.66018	4.67135	0.000496326	0.00575599	-0.898732	PG1_GMTP-WT_GMTP
ENSMUSG00000000247.11	Lhx2	-1.04172	-0.752776	-4.67064	0.000496942	0.00576014	0.0397737	PG1_GMTP-WT_GMTP
ENSMUSG00000022965.8	Ifngr2	-0.231052	7.63568	-4.66941	0.000498016	0.00576959	-0.968609	PG1_GMTP-WT_GMTP
ENSMUSG00000058070.14	Eml1	-1.34817	-2.16931	-4.66776	0.000499463	0.00578335	0.134529	PG1_GMTP-WT_GMTP
ENSMUSG00000024732.7	Ccdc86	-0.329256	5.18885	-4.66721	0.00049995	0.00578598	-0.878021	PG1_GMTP-WT_GMTP
ENSMUSG00000070972.13	Dnajc25	-0.400755	2.59948	-4.66485	0.000502025	0.00580699	-0.516175	PG1_GMTP-WT_GMTP
ENSMUSG00000033629.6	Hacd3	-0.302716	5.5169	-4.66231	0.000504269	0.00582992	-0.907279	PG1_GMTP-WT_GMTP
ENSMUSG00000000532.11	Acvr1b	-0.229041	6.03259	-4.66043	0.000505936	0.00584131	-0.936257	PG1_GMTP-WT_GMTP
ENSMUSG00000020886.17	Dlg4	0.281857	4.19462	4.66036	0.000505999	0.00584131	-0.795419	PG1_GMTP-WT_GMTP
ENSMUSG00000018500.2	Adora2b	-0.952154	0.967552	-4.66031	0.00050604	0.00584131	-0.227193	PG1_GMTP-WT_GMTP
ENSMUSG00000053797.10	Krt16	-6.20634	-4.32565	-4.65711	0.000508889	0.005871	-0.024223	PG1_GMTP-WT_GMTP
ENSMUSG00000025612.5	Bach1	0.330898	7.83699	4.65684	0.000509138	0.005871	-0.995357	PG1_GMTP-WT_GMTP
ENSMUSG00000014226.10	Cacybp	-0.391158	5.57117	-4.65652	0.000509424	0.00587127	-0.920838	PG1_GMTP-WT_GMTP
ENSMUSG00000034786.17	Gpsm3	0.275738	6.40708	4.65345	0.000512172	0.0058999	-0.963698	PG1_GMTP-WT_GMTP
ENSMUSG00000038517.15	Tbkbp1	0.369282	5.73016	4.65149	0.000513941	0.00591722	-0.938381	PG1_GMTP-WT_GMTP
ENSMUSG00000043301.16	Kcnj6	4.24872	-4.63551	4.64812	0.000516994	0.00594575	-0.0765411	PG1_GMTP-WT_GMTP
ENSMUSG00000002900.17	Lamb1	-1.11129	-0.26587	-4.64793	0.00051717	0.00594575	-0.0600093	PG1_GMTP-WT_GMTP
ENSMUSG00000115230.1	AU022793	0.375758	4.01152	4.64787	0.000517218	0.00594575	-0.793616	PG1_GMTP-WT_GMTP
ENSMUSG00000028676.17	Srsf10	-0.257973	6.04245	-4.64686	0.00051814	0.00595328	-0.961384	PG1_GMTP-WT_GMTP
ENSMUSG00000030980.17	Knop1	0.30995	6.47785	4.64534	0.00051953	0.00596617	-0.981011	PG1_GMTP-WT_GMTP
ENSMUSG00000021978.9	Extl3	-0.331364	6.59144	-4.645	0.000519838	0.00596664	-0.985477	PG1_GMTP-WT_GMTP
ENSMUSG00000031939.16	Taf1d	-0.371195	4.27749	-4.64399	0.000520765	0.0059742	-0.83543	PG1_GMTP-WT_GMTP
ENSMUSG00000035397.8	Klf16	-0.305603	3.83839	-4.64323	0.000521456	0.00597906	-0.777066	PG1_GMTP-WT_GMTP
ENSMUSG00000040328.16	Olfr56	-0.829824	0.906245	-4.64188	0.000522699	0.00599023	-0.249851	PG1_GMTP-WT_GMTP
ENSMUSG00000039206.13	Daglb	0.23548	7.94953	4.64081	0.000523681	0.00599841	-1.02648	PG1_GMTP-WT_GMTP
ENSMUSG00000099481.6	Xndc1	0.739983	0.399072	4.63995	0.000524472	0.00600439	-0.171419	PG1_GMTP-WT_GMTP
ENSMUSG00000040713.12	Creg1	0.216318	9.75748	4.63877	0.000525561	0.00601377	-1.04674	PG1_GMTP-WT_GMTP
ENSMUSG00000053819.16	Camk2d	-0.229745	6.15085	-4.63783	0.000526432	0.0060182	-0.982347	PG1_GMTP-WT_GMTP
ENSMUSG00000057914.15	Cacnb2	-5.12847	-5.87475	-4.63768	0.000526576	0.0060182	-0.27454	PG1_GMTP-WT_GMTP
ENSMUSG00000022995.16	Enah	-1.4334	0.249134	-4.63748	0.000526757	0.0060182	-0.152658	PG1_GMTP-WT_GMTP
ENSMUSG00000025037.6	Maoa	-0.328291	3.59285	-4.63626	0.000527894	0.0060281	-0.751099	PG1_GMTP-WT_GMTP
ENSMUSG00000030421.9	Uri1	-0.376513	4.36921	-4.63578	0.000528342	0.00602869	-0.861424	PG1_GMTP-WT_GMTP
ENSMUSG00000045374.18	Wdr81	0.257646	7.50099	4.63562	0.000528486	0.00602869	-1.02728	PG1_GMTP-WT_GMTP
ENSMUSG00000099600.1	Gm29126	4.29725	-6.45543	4.63435	0.000529672	0.00603912	-0.375549	PG1_GMTP-WT_GMTP
ENSMUSG00000039084.8	Chad	2.0855	-3.44078	4.63402	0.000529979	0.00603954	0.0425768	PG1_GMTP-WT_GMTP
ENSMUSG00000046417.14	Lrrc75a	-0.376493	3.05704	-4.63314	0.000530797	0.00604577	-0.661091	PG1_GMTP-WT_GMTP
ENSMUSG00000028480.14	Glipr2	-0.579628	1.51455	-4.63084	0.000532947	0.00606716	-0.374299	PG1_GMTP-WT_GMTP
ENSMUSG00000022971.18	Ifnar2	0.229466	6.84794	4.62972	0.000534004	0.0060761	-1.02136	PG1_GMTP-WT_GMTP
ENSMUSG00000070348.5	Ccnd1	-0.416589	4.92799	-4.62728	0.000536298	0.00609776	-0.931174	PG1_GMTP-WT_GMTP
ENSMUSG00000026766.16	Mmadhc	-0.271756	5.10678	-4.62695	0.00053661	0.00609776	-0.945362	PG1_GMTP-WT_GMTP
ENSMUSG00000030447.15	Cyfip1	-0.249633	8.24663	-4.62683	0.000536727	0.00609776	-1.0566	PG1_GMTP-WT_GMTP
ENSMUSG00000006301.17	Tmbim1	-0.290943	6.42969	-4.62534	0.000538136	0.00611066	-1.01573	PG1_GMTP-WT_GMTP
ENSMUSG00000062169.13	Cnih4	-0.286347	5.68927	-4.62371	0.000539683	0.00612509	-0.98696	PG1_GMTP-WT_GMTP
ENSMUSG00000037905.13	Bri3bp	-0.357077	5.02088	-4.62305	0.000540305	0.0061276	-0.946246	PG1_GMTP-WT_GMTP
ENSMUSG00000032966.14	Fkbp1a	-0.260955	7.00156	-4.62282	0.000540524	0.0061276	-1.03835	PG1_GMTP-WT_GMTP
ENSMUSG00000042055.13	Wdr11	0.240285	6.99662	4.62261	0.000540727	0.0061276	-1.0386	PG1_GMTP-WT_GMTP
ENSMUSG00000026725.17	Tnn	-2.28866	-2.98432	-4.6214	0.000541881	0.00613756	0.053274	PG1_GMTP-WT_GMTP
ENSMUSG00000032782.19	Cntrob	0.433311	2.70296	4.62078	0.000542473	0.00614115	-0.615732	PG1_GMTP-WT_GMTP
ENSMUSG00000027219.13	Slc28a2	-0.281784	5.94409	-4.61872	0.000544445	0.00616034	-1.00831	PG1_GMTP-WT_GMTP
ENSMUSG00000034959.8	Rubcnl	0.419759	3.22214	4.61715	0.000545952	0.00617426	-0.720747	PG1_GMTP-WT_GMTP
ENSMUSG00000075273.4	Ttc30b	0.43544	2.67759	4.61632	0.00054675	0.00618016	-0.618919	PG1_GMTP-WT_GMTP
ENSMUSG00000066682.11	Pilrb2	0.400324	2.71481	4.61601	0.000547052	0.00618045	-0.626659	PG1_GMTP-WT_GMTP
ENSMUSG00000033628.15	Pik3c3	0.253314	5.85425	4.61532	0.000547714	0.00618479	-1.0104	PG1_GMTP-WT_GMTP
ENSMUSG00000064363.1	mt-Nd4	-0.374168	7.81049	-4.61464	0.000548376	0.00618913	-1.0718	PG1_GMTP-WT_GMTP
ENSMUSG00000004933.17	Matk	0.407673	5.56186	4.61201	0.00055092	0.0062136	-1.00139	PG1_GMTP-WT_GMTP
ENSMUSG00000035967.15	Ints6l	0.309061	5.17399	4.61182	0.000551101	0.0062136	-0.977798	PG1_GMTP-WT_GMTP
ENSMUSG00000042379.8	Esm1	3.42606	-6.18422	4.60931	0.000553549	0.00623805	-0.361156	PG1_GMTP-WT_GMTP
ENSMUSG00000026942.13	Traf2	-0.329399	4.76609	-4.60855	0.000554289	0.00623831	-0.95168	PG1_GMTP-WT_GMTP
ENSMUSG00000015340.10	Cybb	-0.308915	11.4773	-4.60851	0.000554326	0.00623831	-1.09795	PG1_GMTP-WT_GMTP
ENSMUSG00000004891.16	Nes	0.377015	3.73906	4.60843	0.000554411	0.00623831	-0.825266	PG1_GMTP-WT_GMTP
ENSMUSG00000034334.8	Fam151b	0.477768	2.42507	4.60684	0.000555964	0.00625263	-0.587064	PG1_GMTP-WT_GMTP
ENSMUSG00000037499.9	Nenf	-0.287443	4.0625	-4.6047	0.000558066	0.00627279	-0.879228	PG1_GMTP-WT_GMTP
ENSMUSG00000039831.16	Arhgap29	-0.913507	0.00707962	-4.60444	0.000558318	0.00627279	-0.174683	PG1_GMTP-WT_GMTP
ENSMUSG00000062743.9	Zfp677	0.514418	3.34051	4.60343	0.000559313	0.0062808	-0.767095	PG1_GMTP-WT_GMTP
ENSMUSG00000038482.11	Tfdp1	-0.22881	5.30246	-4.60289	0.000559854	0.00628372	-1.00262	PG1_GMTP-WT_GMTP
ENSMUSG00000033213.16	AA467197	-1.60881	0.170973	-4.60173	0.000561	0.00629341	-0.203839	PG1_GMTP-WT_GMTP
ENSMUSG00000025911.14	Adhfe1	-1.00516	-0.0756792	-4.60058	0.000562134	0.00630297	-0.169434	PG1_GMTP-WT_GMTP
ENSMUSG00000090017.1	Gm16213	4.25943	-3.05582	4.59524	0.000567455	0.00635943	0.00896277	PG1_GMTP-WT_GMTP
ENSMUSG00000037852.8	Cpe	0.365695	3.81848	4.59428	0.000568415	0.00636477	-0.863058	PG1_GMTP-WT_GMTP
ENSMUSG00000028581.17	Laptm5	0.224993	10.8762	4.59392	0.000568781	0.00636477	-1.12771	PG1_GMTP-WT_GMTP
ENSMUSG00000102752.1	Gm7694	0.604765	2.04988	4.59391	0.000568788	0.00636477	-0.538722	PG1_GMTP-WT_GMTP
ENSMUSG00000090217.1	Gm16116	1.82666	-2.54041	4.59334	0.000569363	0.00636801	0.0176489	PG1_GMTP-WT_GMTP
ENSMUSG00000035692.7	Isg15	-0.472426	6.17565	-4.59254	0.000570164	0.00637098	-1.06596	PG1_GMTP-WT_GMTP
ENSMUSG00000021203.15	Otub2	0.56854	1.38887	4.59251	0.000570199	0.00637098	-0.420715	PG1_GMTP-WT_GMTP
ENSMUSG00000025579.14	Gaa	0.283781	7.31592	4.59177	0.00057094	0.00637606	-1.10308	PG1_GMTP-WT_GMTP
ENSMUSG00000053477.17	Tcf4	0.283204	6.30002	4.59116	0.000571553	0.00637972	-1.07339	PG1_GMTP-WT_GMTP
[truncated: 4,656 more rows]
