# Supplementary material for: PGLYRP-1 mediated intracellular peptidoglycan detection promotes mucosal protection
Source: Research Square preprint supplement (doi:10.21203/rs.3.rs-5118704/v1), 2024-10-14
Supplement: Supplementary file 4 [file 1de4b6eab2bb2b9a395a792e.xlsx]

## Sheet: Sheet1
PGLYRP-1/NOD2 colocalization/ %of RO1 material colocalized/Pearson's coefficient in ROI volume
Cell	%NOD2	% GM130	P-Co		%PG1colocalized	% NOD2 colocalized	P-Co		%PGLTYRP-1	%GM130	P-Co
1	0.93	26.09	0.2182		41.65	36.99	0.525		9.82	38.1	0.5201
2	2.16	31.56	0.1136		48.78	14.02	0.569		12.28	33.68	0.3821
3	0.68	30.12	0.2292		36.32	5.32	0.4523		16.16	55.1	0.5883
4	2.76	77.24	0.1779		41.9	13.68	0.571		9.48	60.05	0.5447
5	1.8	28.97	0.3516		63.21	19.75	0.5148		13.26	28.96	0.7733
6	2.05	63.28	0.1804		50.87	15.25	0.4747		14.8	61.21	0.606
7	2.76	69.21	0.1545		48.92	17.42	0.4938		8.96	35.29	0.4549
8	0.52	11.18	0.1582		7.51	7.43	0.3747		12.38	53.33	0.575
9	2.07	58.64	0.2072		65.06	18	0.4932		9.67	57.53	0.4226
10	2.6	42.43	0.2054		77.23	21.25	0.4888		10.12	39.22	0.3727
11	3.26	53.17	0.2909		67.84	24.53	0.5636		13.85	52.31	0.5922
12	4.2	64.37	0.2444		63.45	22.2	0.5224		17.97	59.91	0.5682
Mean	2.149	46.36	0.211		51.06	17.99	0.5036		12.4	47.89	0.5333
STD	1.08	20.74	0.0641		18.49	8.254	0.05548		2.915	11.89	0.1127
SEM	0.3117	5.988	0.0185		5.337	2.383	0.01602		0.8414	3.431	0.03253
