# Supplementary material for: PGLYRP-1 mediated intracellular peptidoglycan detection promotes mucosal protection
Source: Research Square preprint supplement (doi:10.21203/rs.3.rs-5118704/v1), 2024-10-14
Supplement: Supplementary file 5 [file 451ff77bd38c7bfc62ea43f7.xlsx]

## Sheet: Sheet1
GeneID	GeneSymbol	logFC	AveExpr	t	P.Value	adj.P.Val	B	Contrast
ENSG00000153395.10	LPCAT1	-2.59185	3.41612	-16.584	2.11726907519791e-13	3.65856010289104e-09	20.6569	Healthy-Active
ENSG00000117115.13	PADI2	3.19122	7.82164	16.4856	2.37406969461798e-13	3.65856010289104e-09	20.7658	Healthy-Active
ENSG00000119681.12	LTBP2	-2.48209	4.13141	-15.7541	5.66989348664413e-13	5.82505957172863e-09	19.7787	Healthy-Active
ENSG00000211896.7	IGHG1	-6.56536	9.17132	-15.2529	1.0503859194623e-12	8.09348610593689e-09	19.2536	Healthy-Active
ENSG00000182492.16	BGN	-4.08696	4.16794	-15.0697	1.32158292585545e-12	8.14650147155814e-09	18.9943	Healthy-Active
ENSG00000226742.4	HSBP1L1	1.39669	4.98798	14.9205	1.59635644810777e-12	8.20021701452161e-09	18.8607	Healthy-Active
ENSG00000156284.6	CLDN8	7.66471	4.01402	14.5524	2.56071338359798e-12	1.12748210279819e-08	18.2787	Healthy-Active
ENSG00000177181.15	RIMKLA	2.06567	4.8478	14.1284	4.4691902177997e-12	1.62104242772538e-08	17.8481	Healthy-Active
ENSG00000148346.12	LCN2	-5.09055	5.80867	-13.9861	5.40378341522334e-12	1.62104242772538e-08	17.6586	Healthy-Active
ENSG00000211897.9	IGHG3	-7.60766	6.43155	-13.9073	6.0079066645136e-12	1.62104242772538e-08	17.5583	Healthy-Active
ENSG00000205403.14	CFI	-3.45116	0.53639	-13.8727	6.29458310966272e-12	1.62104242772538e-08	16.5061	Healthy-Active
ENSG00000124256.15	ZBP1	-2.54791	3.86889	-13.8707	6.31144645946095e-12	1.62104242772538e-08	17.4803	Healthy-Active
ENSG00000100219.16	XBP1	-1.77343	8.55333	-13.4952	1.05368345587496e-11	2.49812136873248e-08	16.9357	Healthy-Active
ENSG00000071575.11	TRIB2	-2.60838	4.3803	-13.3224	1.33909292580491e-11	2.76428166359595e-08	16.7631	Healthy-Active
ENSG00000062038.15	CDH3	-6.11114	0.566513	-13.27	1.44069434045063e-11	2.76428166359595e-08	15.8049	Healthy-Active
ENSG00000040199.18	PHLPP2	2.10255	6.18441	13.2403	1.50186503776796e-11	2.76428166359595e-08	16.6414	Healthy-Active
ENSG00000082146.13	STRADB	1.56999	5.41989	13.2101	1.56687202032888e-11	2.76428166359595e-08	16.6116	Healthy-Active
ENSG00000143387.14	CTSK	-2.71311	5.47655	-13.1889	1.61438856444395e-11	2.76428166359595e-08	16.5817	Healthy-Active
ENSG00000013016.16	EHD3	-2.58232	2.48407	-13.079	1.88489017585875e-11	3.05758947948118e-08	16.2088	Healthy-Active
ENSG00000143297.19	FCRL5	-2.57534	4.88112	-12.9256	2.3442755426848e-11	3.48136490605517e-08	16.2157	Healthy-Active
ENSG00000092621.13	PHGDH	-1.90046	2.53527	-12.9174	2.37204059008983e-11	3.48136490605517e-08	16.0117	Healthy-Active
ENSG00000140937.14	CDH11	-2.34084	4.78443	-12.8844	2.48674706128575e-11	3.483819598904e-08	16.1574	Healthy-Active
ENSG00000124253.11	PCK1	5.6608	7.20357	12.603	3.73370711511326e-11	4.51841604301939e-08	15.702	Healthy-Active
ENSG00000137673.9	MMP7	-8.4373	-1.48541	-12.5956	3.77406282064271e-11	4.51841604301939e-08	13.7316	Healthy-Active
ENSG00000155850.8	SLC26A2	4.78239	9.89181	12.5559	3.99967483085882e-11	4.51841604301939e-08	15.5434	Healthy-Active
ENSG00000244437.1	IGKV3-15	-3.07275	7.82247	-12.5247	4.18639035592171e-11	4.51841604301939e-08	15.5663	Healthy-Active
ENSG00000132357.14	CARD6	-2.27206	2.67022	-12.506	4.3023399381187e-11	4.51841604301939e-08	15.4873	Healthy-Active
ENSG00000127914.19	AKAP9	1.10165	8.62799	12.4724	4.51978496424829e-11	4.51841604301939e-08	15.4565	Healthy-Active
ENSG00000143416.21	SELENBP1	3.27289	9.29747	12.4581	4.61599139834217e-11	4.51841604301939e-08	15.4115	Healthy-Active
ENSG00000171385.10	KCND3	-3.23203	2.70011	-12.4511	4.66395421702865e-11	4.51841604301939e-08	15.4814	Healthy-Active
ENSG00000162745.11	OLFML2B	-3.11239	2.15581	-12.4385	4.75073073565774e-11	4.51841604301939e-08	15.2796	Healthy-Active
ENSG00000106415.13	GLCCI1	-1.58352	4.8246	-12.427	4.83175511980828e-11	4.51841604301939e-08	15.5001	Healthy-Active
ENSG00000162391.12	FAM151A	2.64876	1.75302	12.4224	4.86497970767426e-11	4.51841604301939e-08	15.1486	Healthy-Active
ENSG00000152990.14	ADGRA3	1.45425	6.32888	12.3961	5.05725776177029e-11	4.51841604301939e-08	15.4185	Healthy-Active
ENSG00000140274.14	DUOXA2	-7.77843	2.12617	-12.3847	5.14321745735787e-11	4.51841604301939e-08	15.3697	Healthy-Active
ENSG00000197375.13	SLC22A5	2.09832	5.64837	12.3444	5.45934095060441e-11	4.51841604301939e-08	15.3613	Healthy-Active
ENSG00000172716.16	SLFN11	-1.77237	4.62619	-12.3342	5.54222799766157e-11	4.51841604301939e-08	15.3651	Healthy-Active
ENSG00000167107.13	ACSF2	2.38239	5.99726	12.3219	5.64442799673942e-11	4.51841604301939e-08	15.3201	Healthy-Active
ENSG00000176834.14	VSIG10	1.72002	6.20223	12.3132	5.71747268673166e-11	4.51841604301939e-08	15.3005	Healthy-Active
ENSG00000005882.12	PDK2	1.54846	4.66729	12.2949	5.87465068021378e-11	4.52656521537173e-08	15.3078	Healthy-Active
ENSG00000075142.14	SRI	1.64429	7.7495	12.242	6.35586020159402e-11	4.77790164081291e-08	15.1381	Healthy-Active
ENSG00000135074.16	ADAM19	-2.11714	4.97648	-12.094	7.93239937668878e-11	5.74548394225443e-08	15.0064	Healthy-Active
ENSG00000184232.9	OAF	1.57818	6.7906	12.0871	8.0158271800701e-11	5.74548394225443e-08	14.9456	Healthy-Active
ENSG00000141401.12	IMPA2	1.4931	6.29979	12.071	8.21257041532758e-11	5.75271892660935e-08	14.9313	Healthy-Active
ENSG00000105784.15	RUNDC3B	2.1887	2.71421	11.9837	9.36970089832406e-11	6.04840897924441e-08	14.7468	Healthy-Active
ENSG00000111046.4	MYF6	-4.39342	-4.70678	-11.9812	9.40594806287752e-11	6.04840897924441e-08	10.481	Healthy-Active
ENSG00000115841.21	RMDN2	1.98707	3.93163	11.9629	9.66980579559105e-11	6.04840897924441e-08	14.8146	Healthy-Active
ENSG00000162390.18	ACOT11	1.40446	5.51061	11.9489	9.87762799046181e-11	6.04840897924441e-08	14.7712	Healthy-Active
ENSG00000102096.9	PIM2	-2.6925	5.90631	-11.9421	9.97996757759766e-11	6.04840897924441e-08	14.7482	Healthy-Active
ENSG00000104870.13	FCGRT	1.29191	8.06941	11.9408	9.99934460190195e-11	6.04840897924441e-08	14.6717	Healthy-Active
ENSG00000167232.14	ZNF91	1.4021	6.30737	11.9402	1.0008398752197e-10	6.04840897924441e-08	14.7325	Healthy-Active
ENSG00000108352.13	RAPGEFL1	1.8889	7.07247	11.9213	1.03005988071916e-10	6.06220005063515e-08	14.6744	Healthy-Active
ENSG00000139540.12	SLC39A5	2.46329	6.64685	11.8965	1.06964216184331e-10	6.06220005063515e-08	14.6511	Healthy-Active
ENSG00000168502.17	MTCL1	-2.57513	2.41404	-11.8852	1.08833674825e-10	6.06220005063515e-08	14.5657	Healthy-Active
ENSG00000010818.10	HIVEP2	-1.40822	4.48804	-11.8821	1.09340560011173e-10	6.06220005063515e-08	14.6923	Healthy-Active
ENSG00000163359.16	COL6A3	-3.20397	7.22204	-11.876	1.10363944289943e-10	6.06220005063515e-08	14.6042	Healthy-Active
ENSG00000272636.4	DOC2B	-2.74276	0.102627	-11.8584	1.13376136867377e-10	6.06220005063515e-08	13.9143	Healthy-Active
ENSG00000099958.15	DERL3	-2.60084	4.03595	-11.8543	1.1408053046197e-10	6.06220005063515e-08	14.6525	Healthy-Active
ENSG00000137825.11	ITPKA	2.29635	4.875	11.8418	1.16286086264632e-10	6.07466688942749e-08	14.6291	Healthy-Active
ENSG00000122756.15	CNTFR	4.87173	1.60554	11.7869	1.26480179914477e-10	6.42751157162583e-08	14.2731	Healthy-Active
ENSG00000268104.3	SLC6A14	-6.27843	1.90849	-11.7831	1.27211383754315e-10	6.42751157162583e-08	14.4338	Healthy-Active
ENSG00000075239.14	ACAT1	1.60131	6.00935	11.7274	1.38589297386664e-10	6.83088108619103e-08	14.4158	Healthy-Active
ENSG00000133985.3	TTC9	-2.75156	2.33927	-11.7226	1.39627367194457e-10	6.83088108619103e-08	14.3214	Healthy-Active
ENSG00000109819.9	PPARGC1A	2.32706	4.9609	11.7039	1.43705905073614e-10	6.8460524810985e-08	14.412	Healthy-Active
ENSG00000242076.2	IGKV1-33	-3.04518	6.35035	-11.7008	1.4437993941514e-10	6.8460524810985e-08	14.3676	Healthy-Active
ENSG00000151746.15	BICD1	-1.79982	2.71672	-11.687	1.47492370195843e-10	6.88767021485771e-08	14.3226	Healthy-Active
ENSG00000101049.17	SGK2	2.5383	5.6548	11.6741	1.50462835644112e-10	6.92151501102562e-08	14.3448	Healthy-Active
ENSG00000211592.8	IGKC	-2.61589	12.3863	-11.5529	1.81595353112253e-10	8.04401754578897e-08	13.9305	Healthy-Active
ENSG00000162734.13	PEA15	-1.41342	6.08854	-11.5494	1.82590677828544e-10	8.04401754578897e-08	14.1339	Healthy-Active
ENSG00000256193.6	LINC00507	5.02404	-1.61396	11.549	1.82694016483965e-10	8.04401754578897e-08	12.3629	Healthy-Active
ENSG00000168268.11	NT5DC2	-1.5328	4.28499	-11.5192	1.9138898026697e-10	8.06189048857658e-08	14.1396	Healthy-Active
ENSG00000163453.11	IGFBP7	-1.98814	6.33984	-11.518	1.91733152269155e-10	8.06189048857658e-08	14.0776	Healthy-Active
ENSG00000114812.13	VIPR1	2.45224	6.5131	11.5156	1.92467075297265e-10	8.06189048857658e-08	14.0652	Healthy-Active
ENSG00000134352.20	IL6ST	-1.03721	7.19036	-11.5119	1.93562796844576e-10	8.06189048857658e-08	14.0316	Healthy-Active
ENSG00000122591.13	FAM126A	-1.69274	3.81328	-11.4953	1.98673791399763e-10	8.11620814424389e-08	14.1036	Healthy-Active
ENSG00000169855.20	ROBO1	-2.62633	4.26217	-11.4869	2.01272465412223e-10	8.11620814424389e-08	14.0917	Healthy-Active
ENSG00000197043.14	ANXA6	-1.85463	5.98148	-11.4631	2.08940973701772e-10	8.11620814424389e-08	14.0065	Healthy-Active
ENSG00000132170.23	PPARG	1.72498	6.09489	11.4622	2.09231057762768e-10	8.11620814424389e-08	13.9951	Healthy-Active
ENSG00000103257.9	SLC7A5	-2.60699	3.69299	-11.4616	2.09415011147213e-10	8.11620814424389e-08	14.0517	Healthy-Active
ENSG00000224041.3	IGKV3D-15	-2.69432	3.72812	-11.4578	2.10666964582431e-10	8.11620814424389e-08	14.0374	Healthy-Active
ENSG00000244116.3	IGKV2-28	-3.13301	6.91728	-11.4401	2.16585300715121e-10	8.24120438684042e-08	13.9246	Healthy-Active
ENSG00000149485.19	FADS1	-2.56403	2.96763	-11.4007	2.30438803098905e-10	8.58900075251179e-08	13.9215	Healthy-Active
ENSG00000173706.14	HEG1	-2.08644	5.03305	-11.3926	2.33372008276445e-10	8.58900075251179e-08	13.9262	Healthy-Active
ENSG00000182158.15	CREB3L2	-1.34748	6.23551	-11.3852	2.36110992301166e-10	8.58900075251179e-08	13.8681	Healthy-Active
ENSG00000182871.16	COL18A1	-2.60716	6.00262	-11.3832	2.36872607625808e-10	8.58900075251179e-08	13.8804	Healthy-Active
ENSG00000088882.8	CPXM1	-4.70945	2.62221	-11.3616	2.45035958317323e-10	8.6883493428933e-08	13.8349	Healthy-Active
ENSG00000128595.17	CALU	-1.55259	6.70236	-11.359	2.46079701339359e-10	8.6883493428933e-08	13.8098	Healthy-Active
ENSG00000170476.16	MZB1	-2.45329	6.33163	-11.3488	2.50054603438395e-10	8.6883493428933e-08	13.8111	Healthy-Active
ENSG00000181104.7	F2R	-2.14338	4.9682	-11.3378	2.54412373998206e-10	8.6883493428933e-08	13.8408	Healthy-Active
ENSG00000068745.15	IP6K2	1.15553	6.9467	11.3358	2.55247348912227e-10	8.6883493428933e-08	13.7644	Healthy-Active
ENSG00000154096.14	THY1	-3.2889	4.23264	-11.3275	2.58608748319372e-10	8.6883493428933e-08	13.8449	Healthy-Active
ENSG00000198944.6	SOWAHA	2.11101	4.76552	11.3206	2.61446189362253e-10	8.6883493428933e-08	13.8176	Healthy-Active
ENSG00000122188.13	LAX1	-3.08633	3.59609	-11.3189	2.62164267508866e-10	8.6883493428933e-08	13.8311	Healthy-Active
ENSG00000104886.12	PLEKHJ1	1.09352	6.57997	11.3011	2.69627435735331e-10	8.81627657437213e-08	13.7202	Healthy-Active
ENSG00000261371.6	PECAM1	-2.56009	6.5028	-11.2962	2.71745327719851e-10	8.81627657437213e-08	13.7176	Healthy-Active
ENSG00000157654.19	PALM2AKAP2	-1.59679	5.87484	-11.2804	2.78612127928457e-10	8.94490041133645e-08	13.7214	Healthy-Active
ENSG00000161013.17	MGAT4B	1.27871	8.17078	11.2624	2.86685215885807e-10	9.1092010709448e-08	13.5932	Healthy-Active
ENSG00000165376.12	CLDN2	-6.14089	0.175643	-11.2343	2.99749615005229e-10	9.42712539191446e-08	13.211	Healthy-Active
ENSG00000182022.18	CHST15	-2.1985	4.58834	-11.2142	3.09507827417689e-10	9.6356977261016e-08	13.6595	Healthy-Active
ENSG00000174358.16	SLC6A19	6.79224	2.76221	11.199	3.17094573481147e-10	9.70884109524108e-08	13.5871	Healthy-Active
ENSG00000073417.15	PDE8A	1.17782	6.60133	11.1933	3.19986883951903e-10	9.70884109524108e-08	13.5454	Healthy-Active
ENSG00000078098.14	FAP	-5.26373	-0.0892632	-11.1907	3.21307482467989e-10	9.70884109524108e-08	12.7692	Healthy-Active
ENSG00000061918.14	GUCY1B1	-3.09698	2.43594	-11.1693	3.32463026108374e-10	9.94839119192834e-08	13.5142	Healthy-Active
ENSG00000204991.11	SPIRE2	1.6432	6.23033	11.1495	3.43152455274417e-10	1.01695209846277e-07	13.4928	Healthy-Active
ENSG00000132386.11	SERPINF1	-1.74846	5.55522	-11.1425	3.4700839435566e-10	1.01858530689865e-07	13.5151	Healthy-Active
ENSG00000122863.6	CHST3	-2.70013	2.2789	-11.1152	3.6250292554683e-10	1.04910642944621e-07	13.4188	Healthy-Active
ENSG00000004468.13	CD38	-2.51298	3.76577	-11.1055	3.68181822169954e-10	1.04910642944621e-07	13.498	Healthy-Active
ENSG00000132915.11	PDE6A	4.35994	2.61881	11.104	3.69101556952336e-10	1.04910642944621e-07	13.4468	Healthy-Active
ENSG00000168081.9	PNOC	-2.44747	0.764363	-11.0918	3.76380317637924e-10	1.04910642944621e-07	12.9904	Healthy-Active
ENSG00000148090.12	AUH	1.12971	4.69304	11.0893	3.77906881367741e-10	1.04910642944621e-07	13.4558	Healthy-Active
ENSG00000103811.18	CTSH	-1.81308	5.78075	-11.0869	3.79367948523155e-10	1.04910642944621e-07	13.4142	Healthy-Active
ENSG00000187764.12	SEMA4D	-1.48762	5.25443	-11.0838	3.81233315265487e-10	1.04910642944621e-07	13.4285	Healthy-Active
ENSG00000137819.14	PAQR5	2.23327	5.25111	11.0625	3.94516834016242e-10	1.07605339302784e-07	13.3924	Healthy-Active
ENSG00000180535.4	BHLHA15	-2.16628	3.60611	-11.0485	4.03487797434584e-10	1.09086819339748e-07	13.4071	Healthy-Active
ENSG00000218274.2	AL121949.2	6.58515	-0.213883	11.0217	4.21270385619498e-10	1.10257531169964e-07	12.5894	Healthy-Active
ENSG00000111799.22	COL12A1	-3.50349	5.3367	-11.0214	4.21510761013743e-10	1.10257531169964e-07	13.3335	Healthy-Active
ENSG00000253686.2	LINC01484	-4.94411	-0.546413	-11.0101	4.2924064123064e-10	1.10257531169964e-07	12.4244	Healthy-Active
ENSG00000100629.17	CEP128	-1.80307	2.73295	-11.009	4.29997154886299e-10	1.10257531169964e-07	13.3075	Healthy-Active
ENSG00000140511.12	HAPLN3	-3.42679	2.42886	-11.008	4.30687458889086e-10	1.10257531169964e-07	13.29	Healthy-Active
ENSG00000117461.15	PIK3R3	-2.03404	3.72744	-11.0079	4.30795702131777e-10	1.10257531169964e-07	13.3432	Healthy-Active
ENSG00000129128.13	SPCS3	-0.825227	6.94858	-11.0029	4.34251738445378e-10	1.10257531169964e-07	13.2204	Healthy-Active
ENSG00000211651.3	IGLV1-44	-2.83859	7.48941	-10.9998	4.36436806162538e-10	1.10257531169964e-07	13.1958	Healthy-Active
ENSG00000165548.11	TMEM63C	3.44618	2.73373	10.9699	4.58032988715331e-10	1.14772640204839e-07	13.2423	Healthy-Active
ENSG00000128298.18	BAIAP2L2	1.46361	6.19889	10.9572	4.67550528546771e-10	1.15501620848296e-07	13.1806	Healthy-Active
ENSG00000162493.17	PDPN	-3.96023	2.7659	-10.9472	4.75235306999728e-10	1.15501620848296e-07	13.2191	Healthy-Active
ENSG00000143603.19	KCNN3	-2.27563	2.94951	-10.9416	4.79531643769524e-10	1.15501620848296e-07	13.2111	Healthy-Active
ENSG00000172965.17	MIR4435-2HG	-2.35901	2.41317	-10.9416	4.79561823682177e-10	1.15501620848296e-07	13.185	Healthy-Active
ENSG00000119121.22	TRPM6	4.2909	6.0794	10.9414	4.79679681664509e-10	1.15501620848296e-07	13.1598	Healthy-Active
ENSG00000147065.17	MSN	-1.91064	6.889	-10.9243	4.93188807805198e-10	1.17833893374915e-07	13.0969	Healthy-Active
ENSG00000033170.17	FUT8	-1.5723	4.89589	-10.9099	5.04840962120114e-10	1.19690025334646e-07	13.1571	Healthy-Active
ENSG00000175497.17	DPP10	5.43033	1.42965	10.8832	5.27219582377524e-10	1.22952258518035e-07	12.8765	Healthy-Active
ENSG00000070190.13	DAPP1	-2.70398	3.13619	-10.8803	5.29686245694073e-10	1.22952258518035e-07	13.1385	Healthy-Active
ENSG00000155304.6	HSPA13	-1.26488	4.95618	-10.8793	5.30568456016959e-10	1.22952258518035e-07	13.1057	Healthy-Active
ENSG00000177191.2	B3GNT8	1.8087	4.32363	10.8723	5.36689282578814e-10	1.23258254322117e-07	13.1165	Healthy-Active
ENSG00000162545.6	CAMK2N1	1.8695	7.66212	10.8686	5.39887230572851e-10	1.23258254322117e-07	12.9712	Healthy-Active
ENSG00000213626.13	LBH	-2.20153	5.00452	-10.8632	5.44686992063757e-10	1.23439689576449e-07	13.0822	Healthy-Active
ENSG00000253549.6	CA3-AS1	2.39593	2.09806	10.8209	5.83573890417365e-10	1.31287086690172e-07	12.9619	Healthy-Active
ENSG00000029153.14	ARNTL2	-2.64846	3.04965	-10.7941	6.09762043752697e-10	1.36077398887268e-07	12.9929	Healthy-Active
ENSG00000144821.10	MYH15	2.10915	2.46005	10.7901	6.13697104095594e-10	1.36077398887268e-07	12.9461	Healthy-Active
ENSG00000122971.9	ACADS	1.80545	6.97741	10.785	6.18877626692088e-10	1.36245909516263e-07	12.8611	Healthy-Active
ENSG00000240498.9	CDKN2B-AS1	3.91293	5.05584	10.7743	6.29772516340361e-10	1.37217443053708e-07	12.9384	Healthy-Active
ENSG00000012660.14	ELOVL5	-2.22152	4.5254	-10.772	6.32194831888211e-10	1.37217443053708e-07	12.9454	Healthy-Active
ENSG00000167792.13	NDUFV1	0.89541	7.52979	10.7672	6.37204219081038e-10	1.37337561092984e-07	12.8067	Healthy-Active
ENSG00000133065.11	SLC41A1	-1.86497	3.35141	-10.7624	6.42257055413064e-10	1.37465310450597e-07	12.9478	Healthy-Active
ENSG00000135069.14	PSAT1	-1.84693	2.68511	-10.7552	6.49823024891674e-10	1.37945985057251e-07	12.9057	Healthy-Active
ENSG00000090924.15	PLEKHG2	-2.15518	4.14842	-10.7518	6.53454262300337e-10	1.37945985057251e-07	12.9269	Healthy-Active
ENSG00000261183.5	SPINT1-AS1	1.8308	2.77096	10.7476	6.58005473255737e-10	1.37961814225953e-07	12.9044	Healthy-Active
ENSG00000188186.10	LAMTOR4	0.996384	6.00776	10.7343	6.72551115625672e-10	1.39668292851736e-07	12.8263	Healthy-Active
ENSG00000151835.16	SACS	-1.63314	3.33516	-10.7319	6.75207671227692e-10	1.39668292851736e-07	12.8977	Healthy-Active
ENSG00000109790.17	KLHL5	-2.37165	3.55761	-10.7163	6.92705308550362e-10	1.42332468765538e-07	12.8759	Healthy-Active
ENSG00000148842.18	CNNM2	1.46454	5.28554	10.7111	6.98745133339407e-10	1.42470802064756e-07	12.8187	Healthy-Active
ENSG00000182326.15	C1S	-2.05712	7.70374	-10.7077	7.02623597996268e-10	1.42470802064756e-07	12.7045	Healthy-Active
ENSG00000068078.20	FGFR3	2.29839	5.67514	10.6902	7.23120586251221e-10	1.45237371337242e-07	12.7641	Healthy-Active
ENSG00000173153.17	ESRRA	1.12215	7.1179	10.6881	7.25692066640774e-10	1.45237371337242e-07	12.6921	Healthy-Active
ENSG00000167476.10	JSRP1	-3.10621	1.6759	-10.6496	7.73287218702577e-10	1.53727552857323e-07	12.5751	Healthy-Active
ENSG00000103375.11	AQP8	7.10409	7.28259	10.6455	7.78524402058534e-10	1.53727552857323e-07	12.6073	Healthy-Active
ENSG00000128309.17	MPST	1.40391	7.08649	10.642	7.83077310878937e-10	1.53727552857323e-07	12.6191	Healthy-Active
ENSG00000164626.9	KCNK5	1.61788	5.69167	10.6156	8.17959781403839e-10	1.59559103940808e-07	12.6389	Healthy-Active
ENSG00000176658.17	MYO1D	1.6726	8.80917	10.6022	8.3637372656628e-10	1.60951093915081e-07	12.4751	Healthy-Active
ENSG00000115461.5	IGFBP5	-4.04367	6.46972	-10.5954	8.45866044541928e-10	1.60951093915081e-07	12.5759	Healthy-Active
ENSG00000106351.13	AGFG2	1.49832	6.16319	10.5948	8.46703450112628e-10	1.60951093915081e-07	12.5835	Healthy-Active
ENSG00000163501.7	IHH	1.65608	6.10927	10.5937	8.4822130268198e-10	1.60951093915081e-07	12.5829	Healthy-Active
ENSG00000239975.2	IGKV1D-33	-2.91845	3.32354	-10.5916	8.51206265473482e-10	1.60951093915081e-07	12.6678	Healthy-Active
ENSG00000144815.16	NXPE3	-2.0538	3.79631	-10.579	8.69108836057111e-10	1.63334167293392e-07	12.651	Healthy-Active
ENSG00000058668.15	ATP2B4	-1.44126	5.77038	-10.5682	8.84906447525767e-10	1.64719661432941e-07	12.5627	Healthy-Active
ENSG00000165804.16	ZNF219	1.0622	5.50439	10.5666	8.87283379666178e-10	1.64719661432941e-07	12.5695	Healthy-Active
ENSG00000166130.15	IKBIP	-1.92546	3.36731	-10.563	8.92514307105581e-10	1.64719661432941e-07	12.626	Healthy-Active
ENSG00000243466.1	IGKV1-5	-2.67529	8.50004	-10.5503	9.1154377194461e-10	1.66578406769612e-07	12.4018	Healthy-Active
ENSG00000162437.14	RAVER2	1.67562	6.5113	10.5447	9.20177299550695e-10	1.66578406769612e-07	12.4794	Healthy-Active
ENSG00000161714.12	PLCD3	1.48471	7.51734	10.5411	9.25716622534244e-10	1.66578406769612e-07	12.4305	Healthy-Active
ENSG00000167123.19	CERCAM	-2.11163	4.25221	-10.5392	9.28610813709193e-10	1.66578406769612e-07	12.578	Healthy-Active
ENSG00000254645.2	AC087379.1	5.13135	3.03784	10.5385	9.29609226318851e-10	1.66578406769612e-07	12.5721	Healthy-Active
ENSG00000141447.18	OSBPL1A	1.16623	5.2129	10.5138	9.68693648826445e-10	1.72578652892947e-07	12.4952	Healthy-Active
ENSG00000159403.18	C1R	-2.19306	5.49102	-10.5051	9.82843792411447e-10	1.74093267390306e-07	12.4657	Healthy-Active
ENSG00000198959.12	TGM2	-2.89013	5.72656	-10.4945	1.0004981150051e-09	1.76207728014698e-07	12.4279	Healthy-Active
ENSG00000239951.1	IGKV3-20	-2.71683	9.10016	-10.4833	1.01926939561768e-09	1.78493761604163e-07	12.2657	Healthy-Active
ENSG00000102265.12	TIMP1	-2.92138	5.60069	-10.4666	1.04824790520948e-09	1.82531348511082e-07	12.396	Healthy-Active
ENSG00000026508.20	CD44	-1.70834	7.11703	-10.4618	1.05667186781551e-09	1.82964514819898e-07	12.3092	Healthy-Active
ENSG00000130529.16	TRPM4	1.56379	7.87921	10.452	1.07416940128665e-09	1.84955168251708e-07	12.2583	Healthy-Active
ENSG00000100364.19	KIAA0930	-1.08443	5.87665	-10.4442	1.0881695778104e-09	1.86284275213939e-07	12.344	Healthy-Active
ENSG00000008323.15	PLEKHG6	1.80132	6.25841	10.4376	1.10025062841429e-09	1.86284275213939e-07	12.3114	Healthy-Active
ENSG00000198894.8	CIPC	1.31923	5.34437	10.4347	1.10574276880794e-09	1.86284275213939e-07	12.3545	Healthy-Active
ENSG00000170581.14	STAT2	-0.956653	6.59909	-10.4345	1.10606477285458e-09	1.86284275213939e-07	12.2923	Healthy-Active
ENSG00000241351.3	IGKV3-11	-2.7447	8.03979	-10.4211	1.13110151099912e-09	1.88691203805855e-07	12.2088	Healthy-Active
ENSG00000275234.1	AC010503.4	1.53277	3.86586	10.4204	1.1326002629403e-09	1.88691203805855e-07	12.3849	Healthy-Active
ENSG00000166821.9	PEX11A	1.62972	4.60435	10.4138	1.14513766637729e-09	1.89335587675925e-07	12.3497	Healthy-Active
ENSG00000111341.10	MGP	-3.03061	2.65196	-10.4112	1.15017316428509e-09	1.89335587675925e-07	12.3482	Healthy-Active
ENSG00000163430.12	FSTL1	-2.17492	6.70113	-10.4055	1.16115076913006e-09	1.89335587675925e-07	12.2392	Healthy-Active
ENSG00000137094.15	DNAJB5	-2.2069	2.12948	-10.4054	1.16142339743631e-09	1.89335587675925e-07	12.2884	Healthy-Active
ENSG00000211956.2	IGHV4-34	-3.81862	5.19822	-10.4024	1.16718346771441e-09	1.89335587675925e-07	12.3102	Healthy-Active
ENSG00000141542.11	RAB40B	1.47958	4.81562	10.3943	1.18330357118637e-09	1.90945546426886e-07	12.3124	Healthy-Active
ENSG00000177989.13	ODF3B	-1.9005	3.34783	-10.3894	1.19294180359028e-09	1.91498225669042e-07	12.3414	Healthy-Active
ENSG00000122641.11	INHBA	-4.81316	1.21408	-10.3839	1.20418571485228e-09	1.92301595427265e-07	12.1313	Healthy-Active
ENSG00000128294.16	TPST2	-1.37484	4.71967	-10.3696	1.23341826114621e-09	1.95954557870037e-07	12.2733	Healthy-Active
ENSG00000065308.5	TRAM2	-1.14175	6.26831	-10.36	1.25362292404653e-09	1.97866847757202e-07	12.179	Healthy-Active
ENSG00000142273.13	CBLC	1.20729	5.30092	10.3545	1.2653044423735e-09	1.97866847757202e-07	12.2161	Healthy-Active
ENSG00000135093.13	USP30	1.25715	4.65025	10.3508	1.27312330628736e-09	1.97866847757202e-07	12.2443	Healthy-Active
ENSG00000014914.21	MTMR11	1.67395	7.294	10.3491	1.27677893552074e-09	1.97866847757202e-07	12.109	Healthy-Active
ENSG00000234460.2	AL772337.3	4.76535	-2.75841	10.3487	1.27755435267133e-09	1.97866847757202e-07	10.0169	Healthy-Active
ENSG00000074181.9	NOTCH3	-3.05573	4.31876	-10.3276	1.32391608036502e-09	2.04022087564651e-07	12.2198	Healthy-Active
ENSG00000104415.14	CCN4	-4.55614	1.52072	-10.3052	1.37500801673435e-09	2.10841403401837e-07	12.0656	Healthy-Active
ENSG00000140279.13	DUOX2	-6.71765	5.19292	-10.2957	1.39716126048042e-09	2.11227008681196e-07	12.083	Healthy-Active
ENSG00000134871.19	COL4A2	-2.33537	7.1267	-10.2929	1.40392636239883e-09	2.11227008681196e-07	12.0264	Healthy-Active
ENSG00000136048.14	DRAM1	-1.915	4.05691	-10.2912	1.40785975223806e-09	2.11227008681196e-07	12.1612	Healthy-Active
ENSG00000111335.14	OAS2	-1.98879	4.21828	-10.2904	1.40972382659011e-09	2.11227008681196e-07	12.1512	Healthy-Active
ENSG00000066248.15	NGEF	1.55413	4.99827	10.2872	1.41739035172046e-09	2.11227008681196e-07	12.1186	Healthy-Active
ENSG00000110799.14	VWF	-2.69492	5.65382	-10.2867	1.41864283433398e-09	2.11227008681196e-07	12.0872	Healthy-Active
ENSG00000074657.14	ZNF532	-1.48849	4.43098	-10.2832	1.4270972774431e-09	2.11464255711893e-07	12.1404	Healthy-Active
ENSG00000171310.11	CHST11	-2.04846	3.90267	-10.2719	1.45475589784707e-09	2.13595683023179e-07	12.1389	Healthy-Active
ENSG00000198624.13	CCDC69	-1.90895	5.20948	-10.2716	1.45534192384632e-09	2.13595683023179e-07	12.0869	Healthy-Active
ENSG00000132718.9	SYT11	-2.19849	2.97688	-10.2686	1.46294711341535e-09	2.13694279538268e-07	12.1347	Healthy-Active
ENSG00000073711.11	PPP2R3A	1.38004	4.41075	10.2583	1.48862091871398e-09	2.15455396562682e-07	12.0949	Healthy-Active
ENSG00000266010.2	GATA6-AS1	2.34867	2.87341	10.2547	1.49774050767679e-09	2.15455396562682e-07	12.1088	Healthy-Active
ENSG00000151090.20	THRB	2.21705	4.68321	10.2533	1.50140764000419e-09	2.15455396562682e-07	12.0801	Healthy-Active
ENSG00000226197.3	AL583785.1	-5.42914	-3.97284	-10.2526	1.50296584345014e-09	2.15455396562682e-07	9.42632	Healthy-Active
ENSG00000157350.13	ST3GAL2	-1.66555	4.53317	-10.2448	1.52300497197997e-09	2.17317297413864e-07	12.0718	Healthy-Active
ENSG00000171503.12	ETFDH	1.20246	5.81726	10.2351	1.54849973959578e-09	2.19840745687225e-07	11.9882	Healthy-Active
ENSG00000111424.12	VDR	1.40393	7.261	10.2326	1.55495547061468e-09	2.19840745687225e-07	11.9114	Healthy-Active
ENSG00000147883.12	CDKN2B	2.30936	6.94135	10.2281	1.5668873022406e-09	2.20111950442715e-07	11.9206	Healthy-Active
ENSG00000187498.16	COL4A1	-2.92628	6.66703	-10.2253	1.57443734801561e-09	2.20111950442715e-07	11.9302	Healthy-Active
ENSG00000174233.12	ADCY6	1.29275	7.27925	10.2238	1.57829859666591e-09	2.20111950442715e-07	11.8957	Healthy-Active
ENSG00000185070.11	FLRT2	-2.55881	2.65997	-10.2082	1.6209987354372e-09	2.24359777793639e-07	12.0186	Healthy-Active
ENSG00000054938.16	CHRDL2	-7.20682	-0.933563	-10.2073	1.62345700423865e-09	2.24359777793639e-07	11.0292	Healthy-Active
ENSG00000087116.16	ADAMTS2	-2.86264	3.74416	-10.2047	1.63059570506392e-09	2.24359777793639e-07	12.0307	Healthy-Active
ENSG00000166147.14	FBN1	-2.25733	5.33428	-10.1961	1.65445998926531e-09	2.26631605907316e-07	11.9547	Healthy-Active
ENSG00000225697.13	SLC26A6	1.09949	6.48508	10.1817	1.69566948403206e-09	2.31248801625451e-07	11.8658	Healthy-Active
ENSG00000172367.16	PDZD3	2.22113	5.78366	10.1723	1.72314077044012e-09	2.33535354268824e-07	11.887	Healthy-Active
ENSG00000118985.16	ELL2	-1.67578	5.61471	-10.1708	1.72759030444476e-09	2.33535354268824e-07	11.8872	Healthy-Active
ENSG00000157184.7	CPT2	1.14886	5.01533	10.1671	1.73830603955706e-09	2.33957774869817e-07	11.912	Healthy-Active
ENSG00000235026.6	DPP10-AS1	5.81583	0.156932	10.1605	1.75816709835953e-09	2.35602035384953e-07	11.3312	Healthy-Active
ENSG00000135940.7	COX5B	1.17031	7.13619	10.1547	1.77567262395355e-09	2.3691777464447e-07	11.7812	Healthy-Active
ENSG00000211949.3	IGHV3-23	-2.92958	7.81896	-10.1447	1.80636026464645e-09	2.39973403951156e-07	11.7379	Healthy-Active
ENSG00000140848.17	CPNE2	1.00932	5.95434	10.1418	1.81533777259914e-09	2.40131010683598e-07	11.8221	Healthy-Active
ENSG00000011083.9	SLC6A7	1.99234	4.08035	10.1361	1.83296431502031e-09	2.41426466466841e-07	11.9032	Healthy-Active
ENSG00000188747.8	NOXA1	1.01969	5.06673	10.13	1.85215896791427e-09	2.42528716893373e-07	11.8467	Healthy-Active
ENSG00000211677.2	IGLC2	-2.74036	10.0044	-10.1285	1.85707073705707e-09	2.42528716893373e-07	11.6189	Healthy-Active
ENSG00000154217.15	PITPNC1	-1.5581	4.0911	-10.1169	1.89409598035466e-09	2.46320389073886e-07	11.8627	Healthy-Active
ENSG00000120896.13	SORBS3	1.02378	6.10805	10.079	2.02124770327497e-09	2.60135333270615e-07	11.7099	Healthy-Active
ENSG00000175115.13	PACS1	-1.6014	4.87786	-10.0789	2.02162642433292e-09	2.60135333270615e-07	11.7682	Healthy-Active
ENSG00000243649.9	CFB	-2.70826	0.728513	-10.0778	2.02564744768008e-09	2.60135333270615e-07	11.5872	Healthy-Active
ENSG00000211648.2	IGLV1-47	-2.99521	6.67708	-10.0716	2.04709033624757e-09	2.61798220968823e-07	11.6762	Healthy-Active
ENSG00000110090.13	CPT1A	1.33591	8.03385	10.0625	2.07929553682942e-09	2.64818048514957e-07	11.5762	Healthy-Active
ENSG00000144452.15	ABCA12	-6.67155	-0.928003	-10.0567	2.10041207870163e-09	2.65461946013214e-07	11.0619	Healthy-Active
ENSG00000129667.13	RHBDF2	-1.55333	4.31921	-10.0563	2.10157732803038e-09	2.65461946013214e-07	11.7556	Healthy-Active
ENSG00000089327.15	FXYD5	-1.81252	3.93156	-10.0427	2.15162875608552e-09	2.70674897515559e-07	11.7506	Healthy-Active
ENSG00000211964.3	IGHV3-48	-2.74907	5.60019	-10.0227	2.22692683503629e-09	2.79008585295339e-07	11.6389	Healthy-Active
ENSG00000156381.9	ANKRD9	1.59978	6.75777	10.0171	2.24855677930267e-09	2.8057801010076e-07	11.5652	Healthy-Active
ENSG00000131143.10	COX4I1	0.958303	8.39787	10.0034	2.3021473952672e-09	2.86106793828751e-07	11.4585	Healthy-Active
ENSG00000164379.7	FOXQ1	-3.76515	0.72311	-9.99309	2.34352872471129e-09	2.87702376577486e-07	11.4562	Healthy-Active
ENSG00000113140.11	SPARC	-2.40192	8.09989	-9.9929	2.34432560649505e-09	2.87702376577486e-07	11.4598	Healthy-Active
ENSG00000204564.12	C6orf136	1.32786	4.33875	9.99161	2.34955782555209e-09	2.87702376577486e-07	11.6421	Healthy-Active
ENSG00000113721.14	PDGFRB	-2.4531	5.37379	-9.99092	2.35232467789904e-09	2.87702376577486e-07	11.5969	Healthy-Active
ENSG00000131378.14	RFTN1	-2.06758	4.36245	-9.98122	2.39210001954094e-09	2.91410730048503e-07	11.6279	Healthy-Active
ENSG00000108846.16	ABCC3	1.08584	8.09383	9.97768	2.40675220697975e-09	2.92041377052453e-07	11.4269	Healthy-Active
ENSG00000008513.16	ST3GAL1	-1.9738	4.62322	-9.97132	2.43337789555477e-09	2.93938166858492e-07	11.5893	Healthy-Active
ENSG00000278535.5	DHRS11	2.6611	6.14524	9.9694	2.44145779552169e-09	2.93938166858492e-07	11.5104	Healthy-Active
ENSG00000042445.14	RETSAT	1.64644	8.01335	9.96236	2.47139184881965e-09	2.96384311955138e-07	11.4035	Healthy-Active
ENSG00000148218.16	ALAD	0.931647	6.3733	9.95375	2.50845331657323e-09	2.99375297485632e-07	11.4753	Healthy-Active
ENSG00000130734.10	ATG4D	1.20437	5.12546	9.95207	2.51575880240027e-09	2.99375297485632e-07	11.5353	Healthy-Active
ENSG00000159674.12	SPON2	-1.84205	5.53721	-9.9231	2.64532534454571e-09	3.13214836916165e-07	11.4741	Healthy-Active
ENSG00000142484.7	TM4SF5	1.48088	2.90391	9.92156	2.65238222105444e-09	3.13214836916165e-07	11.5535	Healthy-Active
ENSG00000153012.12	LGI2	-3.32391	1.05819	-9.9119	2.69721676371867e-09	3.17293579673943e-07	11.3354	Healthy-Active
ENSG00000158467.16	AHCYL2	1.87026	8.33706	9.89848	2.76082565026976e-09	3.23541472878191e-07	11.2764	Healthy-Active
ENSG00000279249.3	AC007614.1	2.24323	0.678648	9.89508	2.77719887914517e-09	3.24227449447475e-07	11.1918	Healthy-Active
ENSG00000148158.17	SNX30	1.35319	5.95323	9.89234	2.79043716114307e-09	3.24543636768266e-07	11.3892	Healthy-Active
ENSG00000135363.12	LMO2	-1.63361	3.51711	-9.87691	2.86635375725344e-09	3.30967378076215e-07	11.4771	Healthy-Active
ENSG00000167705.12	RILP	1.06458	4.69902	9.87675	2.86714545103499e-09	3.30967378076215e-07	11.4242	Healthy-Active
ENSG00000198189.11	HSD17B11	1.24546	7.37639	9.86648	2.91886023290293e-09	3.35679818053362e-07	11.268	Healthy-Active
ENSG00000185565.12	LSAMP	-2.88596	2.67244	-9.86374	2.93283118470299e-09	3.36032676370746e-07	11.4476	Healthy-Active
ENSG00000138448.12	ITGAV	-1.17856	6.80245	-9.85091	2.99910539349402e-09	3.41923620758746e-07	11.2663	Healthy-Active
ENSG00000211951.2	IGHV2-26	-4.07536	2.77683	-9.84951	3.00643396468707e-09	3.41923620758746e-07	11.429	Healthy-Active
ENSG00000164330.17	EBF1	-2.59756	1.93556	-9.83841	3.06519654297953e-09	3.47325083276368e-07	11.3398	Healthy-Active
ENSG00000071054.16	MAP4K4	-1.31121	6.1063	-9.83552	3.08073037670831e-09	3.4780656022171e-07	11.282	Healthy-Active
ENSG00000160991.16	ORAI2	-1.91634	4.97471	-9.82994	3.11087940236978e-09	3.49237062177503e-07	11.3332	Healthy-Active
ENSG00000164220.7	F2RL2	-3.09722	1.822	-9.82898	3.11606346642917e-09	3.49237062177503e-07	11.3379	Healthy-Active
ENSG00000105369.10	CD79A	-2.70381	5.59061	-9.81535	3.19113196214086e-09	3.56099553498162e-07	11.283	Healthy-Active
ENSG00000204262.14	COL5A2	-2.45634	6.28443	-9.80621	3.2425617167438e-09	3.56099553498162e-07	11.2242	Healthy-Active
ENSG00000117480.16	FAAH	1.58855	5.7541	9.80613	3.24298902458086e-09	3.56099553498162e-07	11.2428	Healthy-Active
ENSG00000186204.15	CYP4F12	2.01155	6.03983	9.80498	3.24949863072169e-09	3.56099553498162e-07	11.2304	Healthy-Active
ENSG00000166869.3	CHP2	3.57793	7.2014	9.80431	3.25334057091898e-09	3.56099553498162e-07	11.1623	Healthy-Active
ENSG00000166278.15	C2	-2.35602	1.35819	-9.80108	3.27176645194738e-09	3.56099553498162e-07	11.2476	Healthy-Active
ENSG00000070882.13	OSBPL3	-1.47039	4.67962	-9.79976	3.27933941734932e-09	3.56099553498162e-07	11.2927	Healthy-Active
ENSG00000143515.19	ATP8B2	-1.79849	4.90794	-9.79664	3.29728226175187e-09	3.56099553498162e-07	11.2776	Healthy-Active
ENSG00000104267.10	CA2	2.44552	9.31367	9.79647	3.29826688528465e-09	3.56099553498162e-07	11.048	Healthy-Active
ENSG00000136457.10	CHAD	2.96178	2.44354	9.79577	3.30231804460558e-09	3.56099553498162e-07	11.3231	Healthy-Active
ENSG00000183853.18	KIRREL1	-2.01825	4.56713	-9.79386	3.31337960892854e-09	3.56099553498162e-07	11.2928	Healthy-Active
ENSG00000069966.19	GNB5	-1.52782	2.85246	-9.79259	3.32074781780382e-09	3.56099553498162e-07	11.3344	Healthy-Active
ENSG00000147684.10	NDUFB9	1.01271	5.56624	9.79143	3.32749331324326e-09	3.56099553498162e-07	11.2289	Healthy-Active
ENSG00000106605.11	BLVRA	-1.69614	3.21556	-9.78807	3.34712706092154e-09	3.56961256555926e-07	11.3284	Healthy-Active
ENSG00000108821.14	COL1A1	-3.31812	8.49676	-9.76498	3.48529208014877e-09	3.70349601678909e-07	11.0411	Healthy-Active
ENSG00000106333.13	PCOLCE	-2.34986	4.33563	-9.76311	3.49669816321866e-09	3.70349601678909e-07	11.2515	Healthy-Active
ENSG00000164692.18	COL1A2	-2.95321	8.37326	-9.75913	3.5212377744906e-09	3.71081668245538e-07	11.035	Healthy-Active
ENSG00000156298.13	TSPAN7	1.47506	5.18305	9.75808	3.52768984769938e-09	3.71081668245538e-07	11.1975	Healthy-Active
ENSG00000143179.16	UCK2	1.17094	5.50655	9.74312	3.62156644015715e-09	3.79660881809808e-07	11.15	Healthy-Active
ENSG00000267940.1	AC022762.2	1.54161	1.77144	9.73828	3.65245874857219e-09	3.81601461321165e-07	11.1813	Healthy-Active
ENSG00000106299.8	WASL	1.10108	7.23788	9.73319	3.68525861094013e-09	3.83106979415638e-07	11.0337	Healthy-Active
ENSG00000153317.15	ASAP1	-1.43828	4.62237	-9.73126	3.69781323870939e-09	3.83106979415638e-07	11.1784	Healthy-Active
ENSG00000171488.15	LRRC8C	-1.7343	3.36789	-9.7293	3.71055919994108e-09	3.83106979415638e-07	11.2258	Healthy-Active
ENSG00000179314.14	WSCD1	1.90057	4.70119	9.72838	3.71658891162765e-09	3.83106979415638e-07	11.1638	Healthy-Active
ENSG00000196628.20	TCF4	-1.63611	6.0921	-9.72642	3.72937077693979e-09	3.83143122386871e-07	11.0924	Healthy-Active
ENSG00000152256.14	PDK1	-1.26915	5.61878	-9.72371	3.74721826488532e-09	3.83697721402094e-07	11.1091	Healthy-Active
ENSG00000100767.17	PAPLN	-2.01814	4.1876	-9.71784	3.78608176693629e-09	3.86393464035575e-07	11.1796	Healthy-Active
ENSG00000172985.11	SH3RF3	-1.50035	3.19367	-9.71188	3.82597162715461e-09	3.89175813599116e-07	11.1976	Healthy-Active
ENSG00000173890.17	GPR160	1.29164	6.42465	9.70755	3.85528478172417e-09	3.90502851452715e-07	11.0319	Healthy-Active
ENSG00000113319.13	RASGRF2	-1.81249	2.56357	-9.70621	3.86435773313903e-09	3.90502851452715e-07	11.1793	Healthy-Active
ENSG00000134013.16	LOXL2	-2.67888	4.61925	-9.68124	4.03815063942434e-09	4.06013729998081e-07	11.0927	Healthy-Active
ENSG00000173432.12	SAA1	-7.25535	-1.36226	-9.68039	4.04419762854582e-09	4.06013729998081e-07	10.6401	Healthy-Active
ENSG00000074695.6	LMAN1	-0.825157	7.17481	-9.67013	4.11812177115789e-09	4.12092958145641e-07	10.9231	Healthy-Active
ENSG00000145623.13	OSMR	-2.37501	4.08172	-9.66437	4.16020235038908e-09	4.14956623434764e-07	11.0866	Healthy-Active
ENSG00000153303.17	FRMD1	4.49849	4.99821	9.6491	4.27387347468904e-09	4.21590863207672e-07	11.0024	Healthy-Active
ENSG00000132640.15	BTBD3	1.00658	6.02765	9.64543	4.3017303146979e-09	4.21590863207672e-07	10.947	Healthy-Active
ENSG00000099139.14	PCSK5	1.21117	5.94319	9.64541	4.30187568438399e-09	4.21590863207672e-07	10.9496	Healthy-Active
ENSG00000111145.8	ELK3	-1.88337	4.69664	-9.64507	4.30445254796134e-09	4.21590863207672e-07	11.0227	Healthy-Active
ENSG00000137501.17	SYTL2	1.45642	7.75399	9.64471	4.30723214935623e-09	4.21590863207672e-07	10.8516	Healthy-Active
ENSG00000128512.23	DOCK4	-1.3403	3.75184	-9.6445	4.30878692808204e-09	4.21590863207672e-07	11.0577	Healthy-Active
ENSG00000249167.2	SEMA6A-AS2	2.60294	-0.097434	9.63923	4.34911867521814e-09	4.23472833576745e-07	10.6366	Healthy-Active
ENSG00000145050.19	MANF	-1.09421	6.06033	-9.6384	4.35550073793284e-09	4.23472833576745e-07	10.9221	Healthy-Active
ENSG00000164403.15	SHROOM1	1.27102	6.42338	9.6125	4.55985399266694e-09	4.4194735820122e-07	10.8606	Healthy-Active
ENSG00000161395.14	PGAP3	1.20773	5.62426	9.60489	4.62175087920182e-09	4.45732509976131e-07	10.8961	Healthy-Active
ENSG00000140464.20	PML	-1.2366	5.29441	-9.60415	4.62783177678732e-09	4.45732509976131e-07	10.9061	Healthy-Active
ENSG00000151388.11	ADAMTS12	-2.91498	1.63428	-9.59804	4.67822282352815e-09	4.49011538700463e-07	10.9089	Healthy-Active
ENSG00000148516.22	ZEB1	-1.49531	4.51451	-9.5965	4.69101312292103e-09	4.49011538700463e-07	10.9467	Healthy-Active
ENSG00000173681.16	BCLAF3	1.04406	4.94281	9.58914	4.75270366338709e-09	4.53042517096811e-07	10.9075	Healthy-Active
ENSG00000183722.9	LHFPL6	-1.80802	3.87933	-9.58797	4.76252475712556e-09	4.53042517096811e-07	10.9639	Healthy-Active
ENSG00000086015.22	MAST2	1.13903	6.96752	9.58169	4.81593314583287e-09	4.56713463039123e-07	10.7782	Healthy-Active
ENSG00000144857.14	BOC	-2.08797	2.58392	-9.5776	4.85104751988259e-09	4.5863231782301e-07	10.9556	Healthy-Active
ENSG00000140474.14	ULK3	0.913795	6.36834	9.57446	4.87814115149963e-09	4.59162401262599e-07	10.8015	Healthy-Active
ENSG00000166128.13	RAB8B	-1.49542	4.76476	-9.57325	4.88868522723345e-09	4.59162401262599e-07	10.8875	Healthy-Active
ENSG00000114023.15	FAM162A	1.56907	6.4939	9.57179	4.90134745840158e-09	4.59162401262599e-07	10.7852	Healthy-Active
ENSG00000006747.15	SCIN	1.87805	6.29179	9.56886	4.92695456473362e-09	4.60162626180772e-07	10.7951	Healthy-Active
ENSG00000102554.14	KLF5	1.61754	8.80304	9.56039	5.00166678511675e-09	4.6572922049572e-07	10.6467	Healthy-Active
ENSG00000163947.12	ARHGEF3	-1.36499	4.14528	-9.55821	5.02110057582174e-09	4.6613054472109e-07	10.8955	Healthy-Active
ENSG00000070778.13	PTPN21	0.938559	5.42751	9.55354	5.06301220281309e-09	4.68609907215923e-07	10.8139	Healthy-Active
ENSG00000240250.3	RN7SL541P	2.8731	-0.89366	9.54333	5.15575693526803e-09	4.75765223059569e-07	10.1645	Healthy-Active
ENSG00000184985.16	SORCS2	-2.94205	2.01242	-9.52896	5.28944236168765e-09	4.86644486655448e-07	10.824	Healthy-Active
ENSG00000227502.3	MROCKI	1.71553	2.54476	9.51965	5.37796403097842e-09	4.93316158924958e-07	10.8592	Healthy-Active
ENSG00000163882.9	POLR2H	0.769144	5.82325	9.51487	5.42398742697966e-09	4.96061473255015e-07	10.7227	Healthy-Active
ENSG00000185338.6	SOCS1	-2.71933	2.39214	-9.50888	5.48227375249042e-09	4.99740488717475e-07	10.8431	Healthy-Active
ENSG00000157193.18	LRP8	-2.33004	1.9647	-9.50595	5.5110043138057e-09	4.99740488717475e-07	10.8168	Healthy-Active
ENSG00000072110.15	ACTN1	-1.15561	6.85414	-9.50576	5.51285701839464e-09	4.99740488717475e-07	10.6474	Healthy-Active
ENSG00000136783.10	NIPSNAP3A	1.40238	5.32312	9.49474	5.62233904000214e-09	5.08170415108229e-07	10.7097	Healthy-Active
ENSG00000061656.11	SPAG4	-2.70078	2.54489	-9.48843	5.68613926774868e-09	5.11201980780973e-07	10.801	Healthy-Active
ENSG00000064692.20	SNCAIP	-2.28883	1.57809	-9.48789	5.69160657379542e-09	5.11201980780973e-07	10.7114	Healthy-Active
ENSG00000128311.14	TST	1.68204	7.63158	9.48644	5.70639064441358e-09	5.11201980780973e-07	10.5655	Healthy-Active
ENSG00000100889.12	PCK2	1.49082	6.02527	9.48186	5.75327368141429e-09	5.11201980780973e-07	10.6498	Healthy-Active
ENSG00000139433.11	GLTP	1.01053	6.3474	9.48058	5.76641864013391e-09	5.11201980780973e-07	10.6294	Healthy-Active
ENSG00000111700.13	SLCO1B3	-6.00481	-3.15133	-9.48023	5.77001343962461e-09	5.11201980780973e-07	8.79161	Healthy-Active
ENSG00000138684.9	IL21	-5.92051	-3.43343	-9.48004	5.77198304116604e-09	5.11201980780973e-07	8.87389	Healthy-Active
ENSG00000139182.15	CLSTN3	-1.71078	4.36741	-9.47839	5.7890150854117e-09	5.11241358015685e-07	10.7421	Healthy-Active
ENSG00000110887.8	DAO	4.01608	0.131428	9.47422	5.83239133888368e-09	5.13600381302097e-07	10.3287	Healthy-Active
ENSG00000100234.12	TIMP3	-2.18652	6.10467	-9.45941	5.98898933945451e-09	5.25887864476717e-07	10.6133	Healthy-Active
ENSG00000186827.11	TNFRSF4	-2.5695	1.77543	-9.45227	6.06609673618947e-09	5.31145362233227e-07	10.7028	Healthy-Active
ENSG00000151617.17	EDNRA	-2.9358	2.34925	-9.4487	6.10495385596312e-09	5.3153892216654e-07	10.7283	Healthy-Active
ENSG00000125652.8	ALKBH7	0.914868	5.65396	9.44802	6.11245953453593e-09	5.3153892216654e-07	10.6113	Healthy-Active
ENSG00000250479.9	CHCHD10	1.35296	6.42422	9.44564	6.13854691525616e-09	5.3153892216654e-07	10.5579	Healthy-Active
ENSG00000123643.13	SLC36A1	1.78325	6.05948	9.44552	6.13984237275123e-09	5.3153892216654e-07	10.5908	Healthy-Active
ENSG00000185386.15	MAPK11	-2.16506	2.27923	-9.44398	6.15682149227653e-09	5.3153892216654e-07	10.7139	Healthy-Active
ENSG00000143753.13	DEGS1	-1.22543	4.9291	-9.44038	6.19670106387121e-09	5.33487495780935e-07	10.6395	Healthy-Active
ENSG00000187583.11	PLEKHN1	-2.49638	0.453564	-9.43391	6.26895879783479e-09	5.36819399921311e-07	10.4491	Healthy-Active
ENSG00000172831.14	CES2	1.57918	8.58083	9.43286	6.28080890523175e-09	5.36819399921311e-07	10.4287	Healthy-Active
ENSG00000113621.15	TXNDC15	-1.01637	5.38447	-9.43112	6.300431613688e-09	5.36819399921311e-07	10.5993	Healthy-Active
ENSG00000133742.14	CA1	4.55252	9.11213	9.43071	6.3050719565074e-09	5.36819399921311e-07	10.4094	Healthy-Active
ENSG00000114999.8	TTL	-0.874849	4.60206	-9.42532	6.36637108831806e-09	5.39389902980598e-07	10.6309	Healthy-Active
ENSG00000103222.20	ABCC1	-1.35799	4.33217	-9.42497	6.37026458210109e-09	5.39389902980598e-07	10.6398	Healthy-Active
ENSG00000155545.20	MIER3	1.76642	6.76807	9.41994	6.42811268562691e-09	5.42796879681389e-07	10.4868	Healthy-Active
ENSG00000198804.2	MT-CO1	1.38538	15.5227	9.41827	6.44736897263529e-09	5.42919234016285e-07	10.1983	Healthy-Active
ENSG00000187688.15	TRPV2	-1.47764	3.22008	-9.41677	6.46479215093529e-09	5.42919234016285e-07	10.6821	Healthy-Active
ENSG00000175040.6	CHST2	-2.76466	3.5634	-9.41259	6.51353378391758e-09	5.45526154223162e-07	10.6646	Healthy-Active
ENSG00000118263.15	KLF7	-1.60179	3.91126	-9.41102	6.53188514863092e-09	5.45580574975484e-07	10.6481	Healthy-Active
ENSG00000169826.8	CSGALNACT2	-1.63653	4.45768	-9.40705	6.57860243561328e-09	5.47997582886587e-07	10.6121	Healthy-Active
ENSG00000004399.13	PLXND1	-1.6541	5.6308	-9.39613	6.70895145755985e-09	5.57349306936529e-07	10.5215	Healthy-Active
ENSG00000095066.12	HOOK2	1.02223	6.47268	9.38838	6.80320315221397e-09	5.63660011705341e-07	10.4533	Healthy-Active
ENSG00000155380.13	SLC16A1	2.13769	4.80339	9.38309	6.86824039100216e-09	5.6752288764364e-07	10.5447	Healthy-Active
ENSG00000174175.17	SELP	-3.58636	2.15038	-9.38084	6.89610134140182e-09	5.68301442361886e-07	10.596	Healthy-Active
ENSG00000240671.4	IGKV1-8	-2.28647	3.52412	-9.37601	6.95626697090263e-09	5.71730944827173e-07	10.6087	Healthy-Active
ENSG00000154783.12	FGD5	-1.69139	3.80349	-9.37438	6.97678535062638e-09	5.71892290669297e-07	10.5883	Healthy-Active
ENSG00000167969.13	ECI1	0.997442	5.92542	9.37081	7.02172697798725e-09	5.74049462038581e-07	10.4549	Healthy-Active
ENSG00000131389.17	SLC6A6	-2.22962	4.47112	-9.36456	7.10127196645098e-09	5.79016675338587e-07	10.5285	Healthy-Active
ENSG00000095539.15	SEMA4G	1.45829	6.40058	9.36154	7.14005649066818e-09	5.79377468858078e-07	10.41	Healthy-Active
ENSG00000116132.12	PRRX1	-4.25683	1.8729	-9.36128	7.14329314967293e-09	5.79377468858078e-07	10.542	Healthy-Active
ENSG00000110777.12	POU2AF1	-2.20767	5.53091	-9.35883	7.17495209045663e-09	5.80417843516966e-07	10.4614	Healthy-Active
ENSG00000165269.13	AQP7	3.23053	3.17004	9.35563	7.21650668365467e-09	5.82251184546913e-07	10.5753	Healthy-Active
ENSG00000117385.16	P3H1	-1.75381	4.08193	-9.35182	7.26623082312564e-09	5.84623555649966e-07	10.533	Healthy-Active
ENSG00000104059.4	FAM189A1	3.16987	0.981633	9.35048	7.2838469020988e-09	5.84623555649966e-07	10.3563	Healthy-Active
ENSG00000222375.1	RN7SKP127	5.64505	-1.14677	9.34085	7.41144817915986e-09	5.93320115142561e-07	9.56846	Healthy-Active
ENSG00000163295.5	ALPI	2.89734	3.94144	9.33205	7.53016690740126e-09	6.01262368531125e-07	10.5095	Healthy-Active
ENSG00000176014.13	TUBB6	-1.90105	4.2892	-9.32713	7.59741304576663e-09	6.05064257063497e-07	10.4783	Healthy-Active
ENSG00000241360.2	PDXP	1.36523	2.31202	9.32105	7.68120358479772e-09	6.10160762080027e-07	10.5017	Healthy-Active
ENSG00000080573.7	COL5A3	-2.40151	3.78277	-9.31062	7.82751617742979e-09	6.19735514521188e-07	10.4723	Healthy-Active
ENSG00000172366.20	MCRIP2	1.19054	5.92441	9.3096	7.84195355969188e-09	6.19735514521188e-07	10.3415	Healthy-Active
ENSG00000186567.13	CEACAM19	1.2545	3.05065	9.30705	7.87811707827644e-09	6.20792269578279e-07	10.4884	Healthy-Active
ENSG00000274993.1	AC254629.1	1.847	4.89352	9.30583	7.89560915202899e-09	6.20792269578279e-07	10.3974	Healthy-Active
ENSG00000067836.13	ROGDI	1.3194	4.72105	9.30305	7.93545274845854e-09	6.22337376998068e-07	10.4041	Healthy-Active
ENSG00000115902.11	SLC1A4	-1.22747	5.19905	-9.30087	7.96674516726517e-09	6.23205717767208e-07	10.368	Healthy-Active
ENSG00000239264.9	TXNDC5	-1.22741	4.23538	-9.29748	8.01575546183748e-09	6.24293845279135e-07	10.4212	Healthy-Active
ENSG00000173193.15	PARP14	-1.31056	6.24767	-9.29711	8.02116617665025e-09	6.24293845279135e-07	10.2891	Healthy-Active
ENSG00000104823.9	ECH1	1.02502	6.22856	9.2937	8.0708422351965e-09	6.25665223171264e-07	10.295	Healthy-Active
ENSG00000049768.16	FOXP3	-2.69265	0.597948	-9.29311	8.0793860946161e-09	6.25665223171264e-07	10.2468	Healthy-Active
ENSG00000279756.1	AC012317.2	3.48394	2.7029	9.29031	8.12057677846494e-09	6.26822014970509e-07	10.4608	Healthy-Active
ENSG00000184307.16	ZDHHC23	1.64436	5.49681	9.28933	8.13499905870036e-09	6.26822014970509e-07	10.3282	Healthy-Active
ENSG00000068650.18	ATP11A	-1.36061	4.58827	-9.2817	8.24814250367092e-09	6.3324690455492e-07	10.3706	Healthy-Active
ENSG00000177301.16	KCNA2	-2.12445	1.49307	-9.28094	8.25947424259686e-09	6.3324690455492e-07	10.3595	Healthy-Active
ENSG00000168918.14	INPP5D	-1.80239	4.10119	-9.26463	8.50746659755894e-09	6.502697889013e-07	10.3687	Healthy-Active
ENSG00000157570.12	TSPAN18	-2.33143	2.90902	-9.26292	8.53379525211008e-09	6.502697889013e-07	10.4125	Healthy-Active
ENSG00000164932.13	CTHRC1	-4.01272	1.41517	-9.26221	8.54479947130289e-09	6.502697889013e-07	10.3194	Healthy-Active
ENSG00000176641.11	RNF152	2.07464	5.26476	9.26042	8.57268610170823e-09	6.50785119065885e-07	10.2969	Healthy-Active
ENSG00000164294.14	GPX8	-2.09499	3.36017	-9.25685	8.62845493331389e-09	6.52962876671706e-07	10.3913	Healthy-Active
ENSG00000196924.19	FLNA	-1.8666	8.0779	-9.25587	8.64374464430278e-09	6.52962876671706e-07	10.132	Healthy-Active
ENSG00000198938.2	MT-CO3	1.54231	13.4661	9.25058	8.7270980465381e-09	6.57647650103547e-07	9.92638	Healthy-Active
ENSG00000101342.10	TLDC2	1.29177	2.98689	9.24296	8.84880179733221e-09	6.6427762001862e-07	10.3752	Healthy-Active
ENSG00000070759.17	TESK2	1.31644	3.76171	9.24238	8.85818441412196e-09	6.6427762001862e-07	10.3503	Healthy-Active
ENSG00000118707.11	TGIF2	-1.51344	2.87741	-9.23862	8.91889847986331e-09	6.65864177514703e-07	10.3693	Healthy-Active
ENSG00000079335.20	CDC14A	1.57933	4.22105	9.23839	8.92254973276572e-09	6.65864177514703e-07	10.3203	Healthy-Active
ENSG00000182985.18	CADM1	-2.0866	3.82999	-9.23518	8.9748712055619e-09	6.67457454500821e-07	10.3386	Healthy-Active
ENSG00000100731.16	PCNX1	-0.958223	5.53013	-9.23442	8.98721143434155e-09	6.67457454500821e-07	10.2284	Healthy-Active
ENSG00000106624.11	AEBP1	-2.25692	6.32016	-9.2223	9.1874747846482e-09	6.77565474272858e-07	10.1686	Healthy-Active
ENSG00000119403.15	PHF19	-1.10274	4.11123	-9.22113	9.20716287594852e-09	6.77565474272858e-07	10.2894	Healthy-Active
ENSG00000116649.10	SRM	-1.41738	4.32984	-9.22101	9.20910293614109e-09	6.77565474272858e-07	10.2725	Healthy-Active
ENSG00000070610.14	GBA2	0.897911	7.26286	9.22088	9.21124991792374e-09	6.77565474272858e-07	10.1025	Healthy-Active
ENSG00000164116.17	GUCY1A1	-3.21361	3.43216	-9.20397	9.49932253213144e-09	6.97091951816245e-07	10.2987	Healthy-Active
ENSG00000010256.11	UQCRC1	1.08981	7.94718	9.19638	9.63147491400479e-09	7.05110898633116e-07	10.0169	Healthy-Active
ENSG00000154127.10	UBASH3B	-1.39476	2.7235	-9.1943	9.66811927535157e-09	7.06116360629409e-07	10.2905	Healthy-Active
ENSG00000170827.9	CELP	4.91986	-0.417875	9.19094	9.72755477112435e-09	7.08777696455848e-07	9.80671	Healthy-Active
ENSG00000142765.18	SYTL1	-1.53702	4.88573	-9.1896	9.75133096569896e-09	7.08834367202376e-07	10.1933	Healthy-Active
ENSG00000178764.8	ZHX2	-1.21693	4.12883	-9.18097	9.90611580555884e-09	7.18391518219127e-07	10.2183	Healthy-Active
ENSG00000166396.13	SERPINB7	-8.36956	-1.7193	-9.17044	1.00982560371072e-08	7.30606453802066e-07	9.25727	Healthy-Active
ENSG00000145214.14	DGKQ	1.03501	6.35136	9.1659	1.01822866084461e-08	7.34960785852262e-07	10.054	Healthy-Active
ENSG00000134954.14	ETS1	-1.33904	6.81048	-9.1595	1.03021491939959e-08	7.41875094177916e-07	10.0155	Healthy-Active
ENSG00000144843.11	ADPRH	-1.86645	2.56616	-9.1566	1.03568048847142e-08	7.44072455365443e-07	10.2216	Healthy-Active
ENSG00000018408.15	WWTR1	-1.6674	4.36859	-9.14381	1.06019283022398e-08	7.59911702798446e-07	10.137	Healthy-Active
ENSG00000102890.16	ELMO3	1.18932	5.81961	9.13921	1.06915480812592e-08	7.645573165023e-07	10.0328	Healthy-Active
ENSG00000117592.9	PRDX6	1.99656	8.0532	9.13686	1.07374908773922e-08	7.6606529243543e-07	9.91009	Healthy-Active
ENSG00000100417.12	PMM1	1.18925	4.70412	9.1255	1.09632334417875e-08	7.80364475541187e-07	10.0836	Healthy-Active
ENSG00000127603.30	MACF1	-0.746547	7.35092	-9.1156	1.11639090487968e-08	7.92195688284996e-07	9.90452	Healthy-Active
ENSG00000239887.6	C1orf226	1.39935	4.42209	9.11393	1.11979785185028e-08	7.92195688284996e-07	10.0714	Healthy-Active
ENSG00000176273.15	SLC35G1	2.07179	4.3989	9.1131	1.12152157178848e-08	7.92195688284996e-07	10.0697	Healthy-Active
ENSG00000167280.17	ENGASE	0.988868	6.85242	9.11227	1.12322609837625e-08	7.92195688284996e-07	9.92612	Healthy-Active
ENSG00000133048.13	CHI3L1	-7.24771	1.46849	-9.10969	1.12855590206889e-08	7.94137476202403e-07	10.1161	Healthy-Active
ENSG00000134240.12	HMGCS2	4.84841	7.92953	9.1066	1.13495095689923e-08	7.95886534082479e-07	9.86355	Healthy-Active
ENSG00000211653.2	IGLV1-40	-2.74372	7.21982	-9.106	1.13620607701337e-08	7.95886534082479e-07	9.89173	Healthy-Active
ENSG00000005102.14	MEOX1	-3.16019	1.57504	-9.10451	1.13931415745226e-08	7.96205501516232e-07	10.08	Healthy-Active
ENSG00000244187.8	TMEM141	1.51499	5.09662	9.10331	1.1418280771882e-08	7.96205501516232e-07	10.0123	Healthy-Active
ENSG00000198832.10	SELENOM	-1.80928	4.36232	-9.10002	1.14874066373527e-08	7.96305529819355e-07	10.0579	Healthy-Active
ENSG00000233493.4	TMEM238	1.0533	4.76416	9.09963	1.14957041350765e-08	7.96305529819355e-07	10.0254	Healthy-Active
ENSG00000124067.17	SLC12A4	-1.52025	4.5393	-9.09955	1.1497224644548e-08	7.96305529819355e-07	10.0471	Healthy-Active
ENSG00000020181.18	ADGRA2	-1.87219	5.10044	-9.09428	1.16091316842472e-08	8.00560384370582e-07	10.005	Healthy-Active
ENSG00000134109.11	EDEM1	-0.927742	6.49642	-9.09225	1.1652407713935e-08	8.00560384370582e-07	9.90596	Healthy-Active
ENSG00000175183.10	CSRP2	-2.57567	2.37934	-9.09178	1.16624158651739e-08	8.00560384370582e-07	10.1015	Healthy-Active
ENSG00000172340.15	SUCLG2	1.44471	8.09168	9.09177	1.16625551598712e-08	8.00560384370582e-07	9.81406	Healthy-Active
ENSG00000090339.9	ICAM1	-2.62705	3.70486	-9.08861	1.17304321943822e-08	8.03430334806789e-07	10.0666	Healthy-Active
ENSG00000164919.11	COX6C	0.943381	5.72438	9.08005	1.19163213114322e-08	8.12538027688776e-07	9.92761	Healthy-Active
ENSG00000085552.17	IGSF9	2.93129	5.48183	9.07954	1.19275719723392e-08	8.12538027688776e-07	9.93646	Healthy-Active
ENSG00000174807.4	CD248	-2.66624	3.19731	-9.07886	1.19424978599986e-08	8.12538027688776e-07	10.0808	Healthy-Active
ENSG00000108001.15	EBF3	-3.32361	-0.625468	-9.0623	1.23115150046094e-08	8.35800008716004e-07	9.51507	Healthy-Active
ENSG00000272686.1	WASL-DT	1.68513	3.47024	9.06058	1.23506160040752e-08	8.36006133489914e-07	10.0283	Healthy-Active
ENSG00000170801.10	HTRA3	-2.72694	3.27037	-9.05966	1.23715491485164e-08	8.36006133489914e-07	10.0431	Healthy-Active
ENSG00000101470.10	TNNC2	3.15629	0.934803	9.05859	1.2395924953924e-08	8.36006133489914e-07	9.89896	Healthy-Active
ENSG00000149131.17	SERPING1	-1.80397	5.7603	-9.05453	1.24888053186368e-08	8.40431154422935e-07	9.88687	Healthy-Active
ENSG00000133107.15	TRPC4	-2.88933	-0.268577	-9.05187	1.25501248394633e-08	8.40960336972099e-07	9.66966	Healthy-Active
ENSG00000101365.21	IDH3B	0.714039	6.13871	9.05182	1.25512395771443e-08	8.40960336972099e-07	9.85245	Healthy-Active
ENSG00000117280.13	RAB29	-1.35674	4.05076	-9.04629	1.26797714828245e-08	8.47729364147797e-07	9.97292	Healthy-Active
ENSG00000113657.13	DPYSL3	-2.07667	5.31819	-9.04231	1.27731307539234e-08	8.5084104319876e-07	9.89062	Healthy-Active
ENSG00000076706.17	MCAM	-2.37647	4.89476	-9.04195	1.27815256805758e-08	8.5084104319876e-07	9.91605	Healthy-Active
ENSG00000166073.11	GPR176	-2.96759	1.92733	-9.03922	1.28459996726253e-08	8.53289991185309e-07	9.97618	Healthy-Active
ENSG00000176532.4	PRR15	1.91661	7.03808	9.03251	1.30057945076808e-08	8.60706132600389e-07	9.76031	Healthy-Active
ENSG00000118473.22	SGIP1	-3.26527	1.60679	-9.03142	1.30318160590724e-08	8.60706132600389e-07	9.96064	Healthy-Active
ENSG00000178078.12	STAP2	1.69145	7.07302	9.03103	1.30414251297616e-08	8.60706132600389e-07	9.75438	Healthy-Active
ENSG00000135083.16	CCNJL	1.94562	4.44628	9.0287	1.30974938752305e-08	8.62559527197606e-07	9.91794	Healthy-Active
ENSG00000168461.13	RAB31	-2.21376	5.07037	-9.02322	1.32305503191808e-08	8.69464373960496e-07	9.86088	Healthy-Active
ENSG00000006042.12	TMEM98	1.33907	6.47645	9.01618	1.34033416477145e-08	8.78945516860021e-07	9.77031	Healthy-Active
ENSG00000102760.13	RGCC	-2.05631	3.20029	-9.00987	1.356031197464e-08	8.87158497722646e-07	9.95056	Healthy-Active
ENSG00000234771.3	SLC25A25-AS1	1.52437	6.08667	9.00884	1.35861526532263e-08	8.87158497722646e-07	9.77126	Healthy-Active
ENSG00000150995.20	ITPR1	-1.56991	4.19223	-8.99916	1.38313508055338e-08	9.0126017585065e-07	9.88464	Healthy-Active
ENSG00000127184.13	COX7C	0.781385	7.18805	8.99756	1.38721142450618e-08	9.02009352630908e-07	9.68721	Healthy-Active
ENSG00000111802.14	TDP2	1.64657	8.14519	8.99219	1.40105641492482e-08	9.09040961295297e-07	9.62391	Healthy-Active
ENSG00000162298.19	SYVN1	-0.906078	6.23701	-8.99108	1.40392426454872e-08	9.09040961295297e-07	9.73455	Healthy-Active
ENSG00000162733.19	DDR2	-1.77757	5.06462	-8.98928	1.40862300798332e-08	9.09971046834746e-07	9.80806	Healthy-Active
ENSG00000112531.17	QKI	-1.31796	5.47223	-8.98826	1.4112655669414e-08	9.09971046834746e-07	9.77884	Healthy-Active
ENSG00000157227.14	MMP14	-1.53547	7.42352	-8.98572	1.4179207084885e-08	9.1096743485498e-07	9.65958	Healthy-Active
ENSG00000263400.8	TMEM220-AS1	1.46317	0.900504	8.9845	1.42112560284586e-08	9.1096743485498e-07	9.80067	Healthy-Active
ENSG00000100983.12	GSS	0.775353	6.14313	8.98429	1.42167786952158e-08	9.1096743485498e-07	9.72459	Healthy-Active
ENSG00000196843.17	ARID5A	-1.78822	3.80536	-8.98176	1.42832625493471e-08	9.13328703388854e-07	9.87095	Healthy-Active
ENSG00000166866.13	MYO1A	1.89548	7.4818	8.97957	1.43412958175045e-08	9.13532224881805e-07	9.6365	Healthy-Active
ENSG00000140859.16	KIFC3	-2.11235	3.24582	-8.97878	1.43623945513207e-08	9.13532224881805e-07	9.89334	Healthy-Active
ENSG00000187097.13	ENTPD5	2.44555	7.62785	8.97829	1.43753651428466e-08	9.13532224881805e-07	9.62835	Healthy-Active
ENSG00000183508.5	TENT5C	-1.26093	6.96697	-8.97496	1.44642481859053e-08	9.16462379114401e-07	9.66427	Healthy-Active
ENSG00000156345.18	CDK20	1.5934	3.47823	8.97433	1.44809441169564e-08	9.16462379114401e-07	9.87487	Healthy-Active
ENSG00000168060.16	NAALADL1	2.63589	4.25908	8.96994	1.45992092538856e-08	9.20024905136831e-07	9.83557	Healthy-Active
ENSG00000112210.12	RAB23	-1.52128	2.61795	-8.96893	1.46264385433687e-08	9.20024905136831e-07	9.88577	Healthy-Active
ENSG00000196839.13	ADA	-2.13202	1.98168	-8.96892	1.46267870451007e-08	9.20024905136831e-07	9.87439	Healthy-Active
ENSG00000141756.19	FKBP10	-2.06966	4.8041	-8.95898	1.48984204966097e-08	9.35202073576389e-07	9.76964	Healthy-Active
ENSG00000166986.15	MARS1	-0.816868	6.16788	-8.95405	1.5035330775626e-08	9.40844215595882e-07	9.6673	Healthy-Active
ENSG00000166822.13	TMEM170A	1.05815	5.92229	8.95354	1.50493559030781e-08	9.40844215595882e-07	9.68103	Healthy-Active
ENSG00000186854.11	TRABD2A	1.96749	6.5024	8.93446	1.55914816642123e-08	9.71298836559556e-07	9.60811	Healthy-Active
ENSG00000125459.17	MSTO1	-1.07187	3.25281	-8.93386	1.56086943019879e-08	9.71298836559556e-07	9.8047	Healthy-Active
ENSG00000101298.15	SNPH	-2.62809	2.42191	-8.93309	1.56310380238649e-08	9.71298836559556e-07	9.82089	Healthy-Active
ENSG00000180879.14	SSR4	-1.23972	7.182	-8.92861	1.57616731907513e-08	9.77445733223632e-07	9.56177	Healthy-Active
ENSG00000223573.7	TINCR	3.6706	2.12006	8.92485	1.58719959491856e-08	9.82310817569982e-07	9.79692	Healthy-Active
ENSG00000213694.6	S1PR3	-2.69089	2.56939	-8.92248	1.59421520678604e-08	9.84675488744538e-07	9.79913	Healthy-Active
ENSG00000138669.9	PRKG2	3.8556	2.63817	8.9184	1.6063161171671e-08	9.90165380944145e-07	9.7944	Healthy-Active
ENSG00000114353.17	GNAI2	-1.46082	6.91978	-8.91289	1.62284330320633e-08	9.98356356249943e-07	9.54773	Healthy-Active
ENSG00000107186.17	MPDZ	-1.79085	3.22522	-8.90818	1.63713989103507e-08	1.00274182938057e-06	9.76769	Healthy-Active
ENSG00000134827.8	TCN1	-7.79672	-1.4101	-8.90759	1.63890998919188e-08	1.00274182938057e-06	9.1734	Healthy-Active
ENSG00000006740.17	ARHGAP44	2.18569	5.93527	8.90732	1.63973226698617e-08	1.00274182938057e-06	9.59135	Healthy-Active
ENSG00000167608.12	TMC4	1.23216	6.67051	8.90225	1.65528326672253e-08	1.00952956402176e-06	9.53916	Healthy-Active
ENSG00000105088.8	OLFM2	-1.82608	1.57049	-8.90157	1.65738282143672e-08	1.00952956402176e-06	9.70674	Healthy-Active
ENSG00000136098.17	NEK3	1.09121	4.95478	8.89948	1.66384079494468e-08	1.01146424341203e-06	9.64167	Healthy-Active
ENSG00000249992.2	TMEM158	-3.10393	1.99908	-8.89234	1.6860610698112e-08	1.02295449276872e-06	9.73275	Healthy-Active
ENSG00000140105.18	WARS1	-1.64353	6.56103	-8.88927	1.69573599625032e-08	1.02680312653106e-06	9.51159	Healthy-Active
ENSG00000100097.12	LGALS1	-1.70874	6.50204	-8.88734	1.70184286636658e-08	1.02848037224087e-06	9.52911	Healthy-Active
ENSG00000163586.10	FABP1	2.33755	10.1809	8.88355	1.71389924350822e-08	1.03373950262558e-06	9.32975	Healthy-Active
ENSG00000189233.12	NUGGC	-1.81288	2.71552	-8.88124	1.72127063455618e-08	1.03615785600891e-06	9.72689	Healthy-Active
ENSG00000076258.10	FMO4	1.63489	3.02945	8.87942	1.72712668464331e-08	1.03765636544623e-06	9.7177	Healthy-Active
ENSG00000159216.19	RUNX1	-1.16498	4.98939	-8.87227	1.75028671908937e-08	1.04952503830844e-06	9.58681	Healthy-Active
ENSG00000170989.10	S1PR1	-2.19897	3.62538	-8.86996	1.75783705396792e-08	1.05200574447272e-06	9.67547	Healthy-Active
ENSG00000049249.9	TNFRSF9	-4.19689	-0.0251837	-8.8673	1.76656664058753e-08	1.05518120987496e-06	9.4659	Healthy-Active
ENSG00000100614.18	PPM1A	0.773429	6.79381	8.86511	1.77378125393691e-08	1.05744123844467e-06	9.46046	Healthy-Active
ENSG00000136010.14	ALDH1L2	-1.91458	3.40128	-8.86309	1.78048386881004e-08	1.05822352970985e-06	9.6778	Healthy-Active
ENSG00000142089.17	IFITM3	-1.6863	6.40315	-8.86265	1.78196039038128e-08	1.05822352970985e-06	9.47078	Healthy-Active
ENSG00000092421.17	SEMA6A	1.28643	6.2291	8.8614	1.78610763214747e-08	1.05864660250802e-06	9.48873	Healthy-Active
ENSG00000104447.13	TRPS1	-1.77941	2.76867	-8.85632	1.80309979952619e-08	1.06666677391932e-06	9.68107	Healthy-Active
ENSG00000101098.13	RIMS4	5.55723	-0.296296	8.85398	1.81101481803785e-08	1.06853781363397e-06	9.15354	Healthy-Active
ENSG00000051009.11	FAM160A2	0.869564	6.76722	8.85333	1.81319644570444e-08	1.06853781363397e-06	9.43977	Healthy-Active
ENSG00000149218.5	ENDOD1	1.53004	6.9066	8.84788	1.83174214382336e-08	1.07740695829733e-06	9.42504	Healthy-Active
ENSG00000106683.15	LIMK1	-1.24406	4.6684	-8.846	1.83816841255374e-08	1.07788011892886e-06	9.56301	Healthy-Active
ENSG00000170382.12	LRRN2	2.77599	4.21223	8.8456	1.83954103551663e-08	1.07788011892886e-06	9.6062	Healthy-Active
ENSG00000159792.10	PSKH1	0.693188	5.32618	8.83499	1.87634496230989e-08	1.09735916666704e-06	9.49729	Healthy-Active
ENSG00000114554.11	PLXNA1	-1.15651	5.28086	-8.83317	1.88274761489786e-08	1.09901826209786e-06	9.49549	Healthy-Active
ENSG00000136859.10	ANGPTL2	-2.89764	4.40033	-8.83085	1.89092187250547e-08	1.10044588394384e-06	9.55778	Healthy-Active
ENSG00000258311.5	AC009779.3	1.46268	1.21566	8.83045	1.89233418283065e-08	1.10044588394384e-06	9.55992	Healthy-Active
ENSG00000148700.15	ADD3	0.856687	7.49591	8.82658	1.9060999303063e-08	1.10636357724991e-06	9.35203	Healthy-Active
ENSG00000260027.5	HOXB7	0.924143	4.73633	8.80899	1.96983325133142e-08	1.14120734284371e-06	9.48548	Healthy-Active
ENSG00000004700.16	RECQL	-1.0125	4.01122	-8.80257	1.99366610480324e-08	1.15227053392401e-06	9.52122	Healthy-Active
ENSG00000196923.14	PDLIM7	-2.03134	4.62285	-8.80183	1.99640655759197e-08	1.15227053392401e-06	9.48906	Healthy-Active
ENSG00000125246.15	CLYBL	1.52289	3.50771	8.79788	2.01125241669257e-08	1.1586693595305e-06	9.54484	Healthy-Active
ENSG00000153029.15	MR1	-1.16842	4.07939	-8.79169	2.03469417799904e-08	1.16998711306173e-06	9.50171	Healthy-Active
ENSG00000158186.13	MRAS	-1.9975	2.46864	-8.78284	2.06872076330046e-08	1.18733785187493e-06	9.54696	Healthy-Active
ENSG00000135472.9	FAIM2	-2.72233	0.55255	-8.77973	2.08082419030178e-08	1.19206472805374e-06	9.39679	Healthy-Active
ENSG00000107819.13	SFXN3	-1.20469	4.72828	-8.77179	2.11204608920084e-08	1.2046882901279e-06	9.42422	Healthy-Active
ENSG00000113361.13	CDH6	-2.52482	1.2844	-8.77127	2.11412723113912e-08	1.2046882901279e-06	9.45584	Healthy-Active
ENSG00000007216.15	SLC13A2	5.90753	2.62762	8.77115	2.11458539618829e-08	1.2046882901279e-06	9.525	Healthy-Active
ENSG00000145103.15	ILDR1	1.65908	4.21144	8.76911	2.12271965024367e-08	1.20709118708783e-06	9.44611	Healthy-Active
ENSG00000124839.13	RAB17	1.60484	4.99016	8.7679	2.12751435730476e-08	1.20758968704402e-06	9.38965	Healthy-Active
ENSG00000058091.17	CDK14	-1.87417	2.89914	-8.7637	2.14435326006951e-08	1.21491014390813e-06	9.51078	Healthy-Active
ENSG00000206432.4	TMEM200C	-3.48246	-0.0789019	-8.76208	2.15091291972779e-08	1.2163905889712e-06	9.14927	Healthy-Active
ENSG00000259834.1	AL365361.1	-1.77324	3.83978	-8.75042	2.19851363320403e-08	1.24103275987145e-06	9.44509	Healthy-Active
ENSG00000270550.1	IGHV3-30	-3.53509	6.60196	-8.74761	2.21015498681023e-08	1.24449042743593e-06	9.24846	Healthy-Active
ENSG00000149256.16	TENM4	-2.69838	0.896758	-8.747	2.21271455901784e-08	1.24449042743593e-06	9.37155	Healthy-Active
ENSG00000162461.8	SLC25A34	2.09871	3.0507	8.74074	2.23887174439044e-08	1.25690830662765e-06	9.46352	Healthy-Active
ENSG00000226715.4	LINC01709	-4.93716	-4.20505	-8.73818	2.24969751150877e-08	1.25849056647275e-06	7.48818	Healthy-Active
ENSG00000061273.18	HDAC7	-1.55218	5.46645	-8.73788	2.25095970765498e-08	1.25849056647275e-06	9.30747	Healthy-Active
ENSG00000211659.2	IGLV3-25	-2.67207	7.06147	-8.73718	2.25393982250076e-08	1.25849056647275e-06	9.21282	Healthy-Active
ENSG00000163541.12	SUCLG1	1.25249	6.91226	8.7357	2.26022987212858e-08	1.25887575367378e-06	9.20495	Healthy-Active
ENSG00000137648.19	TMPRSS4	1.26959	7.94618	8.73509	2.26279863578493e-08	1.25887575367378e-06	9.14438	Healthy-Active
ENSG00000183773.15	AIFM3	2.98345	5.80483	8.7336	2.2691807554764e-08	1.26015171287456e-06	9.26663	Healthy-Active
ENSG00000179583.20	CIITA	-1.994	4.79591	-8.73172	2.27721330221205e-08	1.2623379709978e-06	9.3226	Healthy-Active
ENSG00000178075.20	GRAMD1C	1.28534	4.19323	8.7256	2.3035714688726e-08	1.27465666502913e-06	9.36392	Healthy-Active
ENSG00000172830.13	SSH3	0.777962	5.77409	8.7236	2.312286514262e-08	1.27718606910518e-06	9.25724	Healthy-Active
ENSG00000135100.18	HNF1A	1.37778	3.44602	8.71979	2.32893230226828e-08	1.28212012205961e-06	9.39952	Healthy-Active
ENSG00000237172.4	B3GNT9	-1.72217	2.79652	-8.71965	2.32953917249077e-08	1.28212012205961e-06	9.4298	Healthy-Active
ENSG00000116096.6	SPR	1.29252	5.78089	8.71575	2.34668571106723e-08	1.28741382376706e-06	9.24045	Healthy-Active
ENSG00000011028.14	MRC2	-2.03849	5.16276	-8.71557	2.34751166074134e-08	1.28741382376706e-06	9.28885	Healthy-Active
ENSG00000131781.13	FMO5	1.63784	6.03374	8.71196	2.36352296273561e-08	1.29356623091253e-06	9.22241	Healthy-Active
ENSG00000131828.14	PDHA1	1.06604	6.74651	8.71115	2.36712421477132e-08	1.29356623091253e-06	9.16633	Healthy-Active
ENSG00000166341.9	DCHS1	-1.75347	4.30798	-8.70928	2.37545727898374e-08	1.29530268389786e-06	9.33215	Healthy-Active
ENSG00000093167.18	LRRFIP2	0.787649	6.60002	8.70856	2.37870711231364e-08	1.29530268389786e-06	9.17321	Healthy-Active
ENSG00000124225.16	PMEPA1	-1.54989	5.71782	-8.70236	2.40665928132306e-08	1.30821244637845e-06	9.21696	Healthy-Active
ENSG00000111666.11	CHPT1	1.26607	5.91322	8.69142	2.45685424447294e-08	1.33314620895951e-06	9.18502	Healthy-Active
ENSG00000187736.13	NHEJ1	2.09601	4.20712	8.68628	2.48075371523525e-08	1.34374886216635e-06	9.29209	Healthy-Active
ENSG00000181458.10	TMEM45A	-2.10001	2.58287	-8.68394	2.49175506648634e-08	1.34734005095045e-06	9.36594	Healthy-Active
ENSG00000105552.15	BCAT2	1.35427	5.33895	8.68002	2.51025845117219e-08	1.35496805120102e-06	9.20367	Healthy-Active
ENSG00000225421.2	AC019330.1	5.66085	0.710734	8.67547	2.53192571720771e-08	1.36427417010593e-06	9.25775	Healthy-Active
ENSG00000163565.19	IFI16	-1.60064	5.47582	-8.67295	2.54402084033514e-08	1.36637154831117e-06	9.17883	Healthy-Active
ENSG00000039523.20	RIPOR1	-1.53865	4.31619	-8.67281	2.54468469138123e-08	1.36637154831117e-06	9.26613	Healthy-Active
ENSG00000041982.16	TNC	-3.78337	5.48243	-8.66951	2.56061020751109e-08	1.36969613328122e-06	9.18738	Healthy-Active
ENSG00000124102.5	PI3	-4.14653	5.35326	-8.66906	2.56278435328664e-08	1.36969613328122e-06	9.15441	Healthy-Active
ENSG00000129657.16	SEC14L1	-1.3096	6.06345	-8.66876	2.56420839331386e-08	1.36969613328122e-06	9.13288	Healthy-Active
ENSG00000110900.16	TSPAN11	-1.77182	4.65912	-8.66355	2.5896224961964e-08	1.38087811341296e-06	9.22139	Healthy-Active
ENSG00000172578.12	KLHL6	-1.6781	4.72024	-8.66143	2.59999402508126e-08	1.38401409062227e-06	9.21178	Healthy-Active
ENSG00000143248.13	RGS5	-2.84861	6.42952	-8.65639	2.6249046777569e-08	1.3941096307543e-06	9.08852	Healthy-Active
ENSG00000142156.15	COL6A1	-2.15844	8.11276	-8.65576	2.62800589036127e-08	1.3941096307543e-06	8.996	Healthy-Active
ENSG00000182934.12	SRPRA	-0.777812	6.91423	-8.6509	2.65227547865282e-08	1.40456671009551e-06	9.04524	Healthy-Active
ENSG00000171747.9	LGALS4	1.88116	11.1115	8.64986	2.65752067079557e-08	1.40493043901527e-06	8.84879	Healthy-Active
ENSG00000128609.16	NDUFA5	0.875038	6.61015	8.64886	2.66252969891188e-08	1.40516828510553e-06	9.05904	Healthy-Active
ENSG00000129474.16	AJUBA	-1.60953	2.02075	-8.64746	2.66960188683037e-08	1.40649230348716e-06	9.29232	Healthy-Active
ENSG00000211632.4	IGKV3D-11	-2.48662	2.36803	-8.64274	2.69359064441499e-08	1.41578154587129e-06	9.28689	Healthy-Active
ENSG00000166025.18	AMOTL1	-1.86847	3.45029	-8.64218	2.69642051661674e-08	1.41578154587129e-06	9.26294	Healthy-Active
ENSG00000131873.7	CHSY1	-1.47763	4.51386	-8.63872	2.71416720842992e-08	1.42267597841868e-06	9.18205	Healthy-Active
ENSG00000186318.17	BACE1	-1.09173	3.53647	-8.63355	2.74087461748378e-08	1.43247779758895e-06	9.23318	Healthy-Active
ENSG00000151790.9	TDO2	-5.30252	0.830579	-8.6333	2.74216248848992e-08	1.43247779758895e-06	9.18742	Healthy-Active
ENSG00000169991.11	IFFO2	-1.02508	3.95825	-8.62924	2.76330021353166e-08	1.44107742607884e-06	9.19089	Healthy-Active
ENSG00000100342.21	APOL1	-2.53838	6.04346	-8.62312	2.79554613576239e-08	1.45543120693129e-06	9.02749	Healthy-Active
ENSG00000135503.13	ACVR1B	1.26058	6.84518	8.62071	2.80836720506393e-08	1.45839846993582e-06	8.98978	Healthy-Active
ENSG00000154451.14	GBP5	-2.74473	3.42288	-8.61953	2.81462066615739e-08	1.45839846993582e-06	9.20122	Healthy-Active
ENSG00000154122.14	ANKH	0.902759	6.72779	8.61857	2.81979709241125e-08	1.45839846993582e-06	8.99436	Healthy-Active
ENSG00000181350.12	LRRC75A	1.64215	5.62788	8.6185	2.82017289536923e-08	1.45839846993582e-06	9.06221	Healthy-Active
ENSG00000089356.18	FXYD3	2.26352	4.84584	8.61671	2.829717700884e-08	1.46088323716827e-06	9.11454	Healthy-Active
ENSG00000128590.5	DNAJB9	-1.40103	5.27729	-8.61394	2.84462729602464e-08	1.46612471389257e-06	9.07563	Healthy-Active
ENSG00000174705.13	SH3PXD2B	-1.70127	4.49263	-8.61115	2.85975497830658e-08	1.47146090461414e-06	9.13141	Healthy-Active
ENSG00000148082.10	SHC3	-3.65088	0.222407	-8.60825	2.87552084469602e-08	1.47710713257293e-06	8.97662	Healthy-Active
ENSG00000165757.9	JCAD	-2.40114	2.8557	-8.60639	2.88565475597038e-08	1.47984634332384e-06	9.21737	Healthy-Active
ENSG00000090376.11	IRAK3	-1.98957	3.78193	-8.60364	2.90075452210263e-08	1.48324233750886e-06	9.15536	Healthy-Active
ENSG00000134470.21	IL15RA	-1.08031	3.91446	-8.60344	2.90190172128692e-08	1.48324233750886e-06	9.14532	Healthy-Active
ENSG00000133561.15	GIMAP6	-1.52164	4.65349	-8.60073	2.91682915457703e-08	1.48648436853621e-06	9.09443	Healthy-Active
ENSG00000085117.12	CD82	-1.84231	5.25935	-8.60054	2.91789053880279e-08	1.48648436853621e-06	9.05941	Healthy-Active
ENSG00000141385.10	AFG3L2	1.07688	6.35012	8.59549	2.946000969664e-08	1.49832831495073e-06	8.97204	Healthy-Active
ENSG00000138795.10	LEF1	-2.27078	2.31549	-8.59114	2.97043716061594e-08	1.50826760671077e-06	9.19364	Healthy-Active
ENSG00000197933.13	ZNF823	0.938722	3.69788	8.58419	3.00993400404138e-08	1.52386069605558e-06	9.12683	Healthy-Active
ENSG00000132274.16	TRIM22	-1.78149	5.40636	-8.584	3.01103521591723e-08	1.52386069605558e-06	9.00417	Healthy-Active
ENSG00000137076.21	TLN1	-0.792534	7.56356	-8.58158	3.02490721690562e-08	1.52837156282374e-06	8.87551	Healthy-Active
ENSG00000108557.19	RAI1	-0.816913	4.68092	-8.57259	3.07703743825232e-08	1.54944232308093e-06	9.04133	Healthy-Active
ENSG00000121361.5	KCNJ8	-3.72792	-0.0722441	-8.5722	3.07936174435181e-08	1.54944232308093e-06	8.89088	Healthy-Active
ENSG00000170703.15	TTLL6	2.10678	3.79196	8.5718	3.08169152217193e-08	1.54944232308093e-06	9.09693	Healthy-Active
ENSG00000168077.14	SCARA3	-1.74631	3.31156	-8.56845	3.10140548725095e-08	1.55681463391794e-06	9.1279	Healthy-Active
ENSG00000198535.5	C2CD4A	-3.85721	0.477057	-8.56498	3.12195372543681e-08	1.56458106945834e-06	9.0572	Healthy-Active
ENSG00000103742.12	IGDCC4	-2.72145	2.73923	-8.56141	3.14323519195643e-08	1.57268915343002e-06	9.13648	Healthy-Active
ENSG00000188677.15	PARVB	-1.58088	3.10511	-8.55966	3.15369885249197e-08	1.57536713667188e-06	9.12309	Healthy-Active
ENSG00000134339.9	SAA2	-6.84213	-2.3311	-8.55837	3.16146182219549e-08	1.57668956022471e-06	8.35007	Healthy-Active
ENSG00000134716.11	CYP2J2	1.74248	4.8411	8.55165	3.20217249905613e-08	1.59441290134748e-06	8.98512	Healthy-Active
ENSG00000101224.18	CDC25B	-1.63022	5.12602	-8.5469	3.23129230410854e-08	1.6063170984666e-06	8.95142	Healthy-Active
ENSG00000110721.12	CHKA	1.28324	5.0135	8.54537	3.24068402602835e-08	1.60839166451239e-06	8.96782	Healthy-Active
ENSG00000115935.18	WIPF1	-1.74696	5.67668	-8.54186	3.26244880632852e-08	1.61483823504887e-06	8.9159	Healthy-Active
ENSG00000275832.5	ARHGAP23	-2.27412	2.11246	-8.53993	3.27447897329629e-08	1.61483823504887e-06	9.09542	Healthy-Active
ENSG00000119227.8	PIGZ	2.17462	6.10455	8.53969	3.27599985143892e-08	1.61483823504887e-06	8.88085	Healthy-Active
ENSG00000066468.23	FGFR2	1.93171	5.1479	8.53839	3.28408473119797e-08	1.61483823504887e-06	8.93507	Healthy-Active
ENSG00000079739.17	PGM1	1.06215	6.34373	8.53832	3.28453118110251e-08	1.61483823504887e-06	8.86068	Healthy-Active
ENSG00000091039.17	OSBPL8	-1.14232	5.71756	-8.53823	3.28510941687693e-08	1.61483823504887e-06	8.90624	Healthy-Active
ENSG00000026751.17	SLAMF7	-1.71187	6.06813	-8.53471	3.30724332743609e-08	1.62312972284885e-06	8.87438	Healthy-Active
ENSG00000109113.20	RAB34	-1.68863	3.68258	-8.53335	3.31582549944949e-08	1.62475449473025e-06	9.04522	Healthy-Active
ENSG00000073712.15	FERMT2	-1.6449	4.27516	-8.53145	3.32789530850324e-08	1.62772561407892e-06	8.9955	Healthy-Active
ENSG00000163638.13	ADAMTS9	-2.5213	3.20109	-8.53073	3.33245145350182e-08	1.62772561407892e-06	9.05743	Healthy-Active
ENSG00000235106.10	BRD3OS	-1.27005	2.51708	-8.52987	3.33787765315853e-08	1.6277963156329e-06	9.0804	Healthy-Active
ENSG00000171813.14	PWWP2B	1.0586	5.63571	8.52862	3.34586668839714e-08	1.62911464775811e-06	8.89022	Healthy-Active
ENSG00000095203.15	EPB41L4B	2.23913	7.50956	8.522	3.38841165800272e-08	1.64722769260728e-06	8.75648	Healthy-Active
ENSG00000135736.6	CCDC102A	-1.78504	2.22148	-8.51868	3.40996735270085e-08	1.65509612248178e-06	9.05882	Healthy-Active
ENSG00000170088.14	TMEM192	0.970445	5.0685	8.51633	3.42527212958342e-08	1.65892461662875e-06	8.91201	Healthy-Active
ENSG00000090861.17	AARS1	-0.731751	6.361	-8.51563	3.4298445236905e-08	1.65892461662875e-06	8.81636	Healthy-Active
ENSG00000074964.17	ARHGEF10L	1.06803	6.66205	8.515	3.43400248340139e-08	1.65892461662875e-06	8.79489	Healthy-Active
ENSG00000164983.8	TMEM65	0.918382	5.29465	8.51348	3.44400142676848e-08	1.6611512985044e-06	8.88838	Healthy-Active
ENSG00000140577.16	CRTC3	-0.860606	4.9124	-8.50631	3.49150120606868e-08	1.68143060425379e-06	8.89906	Healthy-Active
ENSG00000169756.16	LIMS1	-0.88385	5.90118	-8.4994	3.53785529061818e-08	1.7010780871563e-06	8.81711	Healthy-Active
ENSG00000181191.12	PJA1	-1.03307	3.62733	-8.49859	3.54333776306527e-08	1.7010780871563e-06	8.97451	Healthy-Active
ENSG00000153721.19	CNKSR3	1.46206	4.33894	8.49752	3.55064845519544e-08	1.70193679685192e-06	8.92809	Healthy-Active
ENSG00000133104.14	SPART	-1.40564	3.82466	-8.49509	3.56712957839562e-08	1.70476827036384e-06	8.95616	Healthy-Active
ENSG00000037280.16	FLT4	-2.19156	2.17283	-8.49502	3.56761796951649e-08	1.70476827036384e-06	9.01378	Healthy-Active
ENSG00000119630.14	PGF	-2.46179	1.82598	-8.49358	3.57747773543455e-08	1.70683345640601e-06	8.99543	Healthy-Active
ENSG00000027075.15	PRKCH	-1.41335	3.98639	-8.48841	3.61303720546407e-08	1.72113477140043e-06	8.93384	Healthy-Active
ENSG00000225377.6	NRSN2-AS1	1.5892	3.40456	8.48386	3.64461421998275e-08	1.7334977604026e-06	8.96113	Healthy-Active
ENSG00000138744.16	NAAA	1.58563	6.44077	8.4802	3.67021245395365e-08	1.74098435627735e-06	8.75052	Healthy-Active
ENSG00000143627.19	PKLR	4.16359	-1.47101	8.47946	3.67539679261529e-08	1.74098435627735e-06	8.07354	Healthy-Active
ENSG00000116157.6	GPX7	-2.13607	1.78118	-8.47919	3.67730059354516e-08	1.74098435627735e-06	8.96909	Healthy-Active
ENSG00000172638.13	EFEMP2	-1.7287	4.04633	-8.47734	3.69034810766295e-08	1.74448188690613e-06	8.91291	Healthy-Active
ENSG00000277938.1	AL035252.3	1.88564	1.88035	8.4705	3.73905699075592e-08	1.76480054382983e-06	8.96184	Healthy-Active
ENSG00000266094.8	RASSF5	-1.84988	4.65061	-8.46669	3.7664317596436e-08	1.77500295510666e-06	8.84051	Healthy-Active
ENSG00000047597.7	XK	1.49674	5.63619	8.46565	3.77392436503349e-08	1.77581866953736e-06	8.76245	Healthy-Active
ENSG00000178882.15	RFLNA	2.32045	5.47064	8.46301	3.79307187354037e-08	1.78067309507705e-06	8.77328	Healthy-Active
ENSG00000184575.12	XPOT	-0.687664	5.71918	-8.46255	3.79639909390071e-08	1.78067309507705e-06	8.75601	Healthy-Active
ENSG00000070019.5	GUCY2C	1.30942	6.27803	8.46184	3.80157326680087e-08	1.78067309507705e-06	8.71512	Healthy-Active
ENSG00000115919.15	KYNU	-3.46673	1.87654	-8.45869	3.82461355672623e-08	1.78874680473231e-06	8.94639	Healthy-Active
ENSG00000116670.15	MAD2L2	-1.48747	2.87895	-8.45514	3.85074897206255e-08	1.79602489847438e-06	8.93169	Healthy-Active
ENSG00000136872.20	ALDOB	-4.25703	3.62889	-8.45499	3.85182978453511e-08	1.79602489847438e-06	8.88385	Healthy-Active
ENSG00000179981.11	TSHZ1	0.957373	5.37924	8.45086	3.8824153349487e-08	1.80557207228341e-06	8.76216	Healthy-Active
ENSG00000179776.19	CDH5	-2.3524	4.09753	-8.45065	3.8840215564839e-08	1.80557207228341e-06	8.84983	Healthy-Active
ENSG00000115355.17	CCDC88A	-1.55337	5.11885	-8.44714	3.91024722135339e-08	1.81502604833333e-06	8.77793	Healthy-Active
ENSG00000184731.6	FAM110C	1.55387	5.21087	8.44597	3.91905013943856e-08	1.81637660673137e-06	8.75541	Healthy-Active
ENSG00000138080.14	EMILIN1	-1.63035	6.6224	-8.44417	3.93258945417178e-08	1.81836123108445e-06	8.6678	Healthy-Active
ENSG00000049192.15	ADAMTS6	-2.99207	0.494722	-8.44383	3.93513169959874e-08	1.81836123108445e-06	8.74734	Healthy-Active
ENSG00000214357.9	NEURL1B	1.3455	6.5598	8.43296	4.01813841989668e-08	1.8539377880185e-06	8.64859	Healthy-Active
ENSG00000119771.15	KLHL29	-1.46303	3.00262	-8.4301	4.04024245711694e-08	1.8591064303784e-06	8.87974	Healthy-Active
ENSG00000177469.13	CAVIN1	-2.16341	5.99631	-8.42995	4.04140458892809e-08	1.8591064303784e-06	8.68318	Healthy-Active
ENSG00000005059.16	MCUB	-1.23201	3.44403	-8.42589	4.07303256068257e-08	1.87086343595824e-06	8.84083	Healthy-Active
ENSG00000163347.6	CLDN1	-3.16829	1.75868	-8.42504	4.0796968092588e-08	1.87113594282984e-06	8.88382	Healthy-Active
ENSG00000162069.16	BICDL2	1.40238	6.8185	8.42182	4.10507390939864e-08	1.87997745856724e-06	8.60303	Healthy-Active
ENSG00000142686.8	C1orf216	-1.76279	2.46821	-8.42017	4.11804793380183e-08	1.88110046862636e-06	8.87614	Healthy-Active
ENSG00000085563.15	ABCB1	2.50465	6.08416	8.41945	4.12376403815189e-08	1.88110046862636e-06	8.65214	Healthy-Active
ENSG00000088888.18	MAVS	0.895612	7.96168	8.41919	4.12583601048447e-08	1.88110046862636e-06	8.53267	Healthy-Active
ENSG00000112078.14	KCTD20	-0.708037	5.91362	-8.41191	4.18401955619326e-08	1.90234406660902e-06	8.64774	Healthy-Active
ENSG00000163701.19	IL17RE	1.29483	6.1323	8.41181	4.18477426806696e-08	1.90234406660902e-06	8.63039	Healthy-Active
ENSG00000114859.16	CLCN2	1.9638	5.50803	8.41064	4.19418639949829e-08	1.90381471309185e-06	8.67161	Healthy-Active
ENSG00000142949.17	PTPRF	1.32723	9.00099	8.40504	4.23964608278244e-08	1.92161958702114e-06	8.45365	Healthy-Active
ENSG00000155324.10	GRAMD2B	1.34942	5.15807	8.40404	4.24784486507509e-08	1.92180651311896e-06	8.67428	Healthy-Active
ENSG00000122679.8	RAMP3	-2.62177	2.91749	-8.40346	4.25252925585521e-08	1.92180651311896e-06	8.82917	Healthy-Active
ENSG00000139329.5	LUM	-2.57477	7.52183	-8.40053	4.27658949812742e-08	1.92985014526772e-06	8.53224	Healthy-Active
ENSG00000138162.19	TACC2	1.02333	6.23992	8.3989	4.29002522565541e-08	1.93308285789365e-06	8.59758	Healthy-Active
ENSG00000198682.13	PAPSS2	1.18962	7.87363	8.3969	4.30661002790488e-08	1.93772303167965e-06	8.48911	Healthy-Active
ENSG00000234608.8	MAPKAPK5-AS1	0.922577	4.67924	8.39321	4.33728974991693e-08	1.94868232335554e-06	8.69725	Healthy-Active
ENSG00000254087.8	LYN	-1.63453	5.44788	-8.3876	4.38438736089307e-08	1.96697529621667e-06	8.62079	Healthy-Active
ENSG00000142227.11	EMP3	-1.66562	4.0499	-8.38642	4.39439986909434e-08	1.96860172042669e-06	8.74047	Healthy-Active
ENSG00000140678.17	ITGAX	-2.83796	3.94031	-8.38352	4.41903356400793e-08	1.97418646793535e-06	8.72213	Healthy-Active
ENSG00000150667.8	FSIP1	2.55459	0.645991	8.38344	4.41967704771225e-08	1.97418646793535e-06	8.69043	Healthy-Active
ENSG00000133789.15	SWAP70	-1.21162	5.56391	-8.37449	4.49657477731228e-08	2.00562852693982e-06	8.60042	Healthy-Active
ENSG00000189221.10	MAOA	1.91569	8.18346	8.36817	4.55172885557352e-08	2.02729530430103e-06	8.42074	Healthy-Active
ENSG00000131196.18	NFATC1	-2.44523	2.53377	-8.3623	4.6035517164947e-08	2.04741800078042e-06	8.76719	Healthy-Active
ENSG00000124772.12	CPNE5	-1.65809	4.54087	-8.35874	4.63530984940767e-08	2.05857182807772e-06	8.64455	Healthy-Active
ENSG00000133606.11	MKRN1	0.950755	7.6799	8.35385	4.67922223750081e-08	2.0750835767196e-06	8.42087	Healthy-Active
ENSG00000162813.18	BPNT1	0.903455	6.22816	8.34849	4.72790868048738e-08	2.09332316053722e-06	8.49976	Healthy-Active
ENSG00000148848.14	ADAM12	-3.51616	1.29573	-8.34783	4.73393544302404e-08	2.09332316053722e-06	8.69291	Healthy-Active
ENSG00000111775.3	COX6A1	1.01426	5.04248	8.34486	4.7611898016975e-08	2.09932436974054e-06	8.57157	Healthy-Active
ENSG00000165795.23	NDRG2	1.32297	6.86372	8.34376	4.77127487066439e-08	2.09932436974054e-06	8.4462	Healthy-Active
ENSG00000235029.1	MNX1-AS2	2.25954	-0.289762	8.34352	4.77354540348621e-08	2.09932436974054e-06	8.3895	Healthy-Active
ENSG00000240990.10	HOXA11-AS	2.15221	3.36722	8.34339	4.77475222474325e-08	2.09932436974054e-06	8.70514	Healthy-Active
ENSG00000120254.16	MTHFD1L	-1.29211	2.89639	-8.34071	4.79953187957892e-08	2.10636274688572e-06	8.70898	Healthy-Active
ENSG00000211662.2	IGLV3-21	-3.62636	6.6224	-8.33948	4.81090739978136e-08	2.10636274688572e-06	8.45412	Healthy-Active
ENSG00000151276.23	MAGI1	1.01784	5.48518	8.33944	4.81126301485203e-08	2.10636274688572e-06	8.53701	Healthy-Active
ENSG00000146094.16	DOK3	-2.31788	3.7477	-8.33837	4.821269301195e-08	2.1077495196047e-06	8.66311	Healthy-Active
ENSG00000233006.8	MIR3936HG	2.18152	2.9902	8.33434	4.85896985684591e-08	2.11880429684811e-06	8.69898	Healthy-Active
ENSG00000107537.14	PHYH	1.27281	5.42153	8.3342	4.86030510973561e-08	2.11880429684811e-06	8.52788	Healthy-Active
ENSG00000141738.14	GRB7	1.50297	4.35275	8.33194	4.88154280441037e-08	2.1250569318465e-06	8.59803	Healthy-Active
ENSG00000211459.2	MT-RNR1	1.36022	11.9164	8.32973	4.90244139494792e-08	2.1311445166952e-06	8.19499	Healthy-Active
ENSG00000075618.18	FSCN1	-2.32107	4.37635	-8.32118	4.9841940354713e-08	2.16205986375976e-06	8.5849	Healthy-Active
ENSG00000168118.12	RAB4A	0.79096	5.41886	8.32083	4.98758821301447e-08	2.16205986375976e-06	8.50217	Healthy-Active
ENSG00000198759.12	EGFL6	-5.65134	-0.665571	-8.31777	5.0171924866044e-08	2.17183833749486e-06	8.30846	Healthy-Active
ENSG00000122861.16	PLAU	-2.54252	4.26829	-8.31497	5.04449614960596e-08	2.18059489238437e-06	8.5724	Healthy-Active
ENSG00000155926.14	SLA	-2.03235	4.19646	-8.3136	5.05786578198768e-08	2.18272343064018e-06	8.57395	Healthy-Active
ENSG00000184014.9	DENND5A	-1.68138	4.51352	-8.31302	5.0635840917158e-08	2.18272343064018e-06	8.55665	Healthy-Active
ENSG00000077782.21	FGFR1	-1.8258	4.61791	-8.31156	5.07787344367861e-08	2.18516188955783e-06	8.55401	Healthy-Active
ENSG00000142173.16	COL6A2	-1.84587	8.55202	-8.311	5.08342063791884e-08	2.18516188955783e-06	8.29912	Healthy-Active
ENSG00000166963.13	MAP1A	-2.0473	2.24592	-8.30749	5.1180642079068e-08	2.189460677544e-06	8.66448	Healthy-Active
ENSG00000060982.15	BCAT1	-1.83124	3.00771	-8.30723	5.12066188207374e-08	2.189460677544e-06	8.6562	Healthy-Active
ENSG00000214530.10	STARD10	1.70411	7.53563	8.30693	5.12361136328882e-08	2.189460677544e-06	8.3377	Healthy-Active
ENSG00000112208.11	BAG2	-1.64071	2.01261	-8.30661	5.12678846782584e-08	2.189460677544e-06	8.66136	Healthy-Active
ENSG00000176894.10	PXMP2	1.85121	2.29821	8.30639	5.12894003824265e-08	2.189460677544e-06	8.66246	Healthy-Active
ENSG00000148468.17	FAM171A1	0.877391	6.12463	8.30486	5.14415457186704e-08	2.19291823042205e-06	8.42211	Healthy-Active
ENSG00000091140.14	DLD	0.768993	7.01611	8.30114	5.18136623735234e-08	2.20573050830713e-06	8.35461	Healthy-Active
ENSG00000163513.19	TGFBR2	-0.969196	7.10907	-8.29977	5.19514842005127e-08	2.20854716488828e-06	8.35207	Healthy-Active
ENSG00000106976.21	DNM1	-1.89384	3.68455	-8.29612	5.23202583696719e-08	2.22116072067722e-06	8.59245	Healthy-Active
ENSG00000123739.11	PLA2G12A	1.08526	5.13621	8.29152	5.27896355364945e-08	2.23800461742819e-06	8.46374	Healthy-Active
ENSG00000112304.11	ACOT13	1.04458	5.04021	8.28623	5.33331300706168e-08	2.2579401125089e-06	8.45957	Healthy-Active
ENSG00000050767.18	COL23A1	-3.19809	1.71309	-8.27939	5.40463218905101e-08	2.28499545540111e-06	8.60547	Healthy-Active
ENSG00000278484.1	AC010998.3	3.15834	-0.0666314	8.2774	5.42545342242818e-08	2.28966547484766e-06	8.33747	Healthy-Active
ENSG00000184076.13	UQCR10	0.963743	3.68694	8.27692	5.4305358752592e-08	2.28966547484766e-06	8.54115	Healthy-Active
ENSG00000124496.12	TRERF1	-1.21297	4.0389	-8.26703	5.53579626157111e-08	2.33079266591793e-06	8.49812	Healthy-Active
ENSG00000156127.8	BATF	-2.77689	1.2171	-8.26582	5.5488849313448e-08	2.33079266591793e-06	8.55196	Healthy-Active
ENSG00000122585.8	NPY	4.63266	-0.802767	8.26564	5.550766739508e-08	2.33079266591793e-06	8.03033	Healthy-Active
ENSG00000071242.12	RPS6KA2	-1.49977	4.73629	-8.26065	5.60481342152184e-08	2.35028509475816e-06	8.42913	Healthy-Active
ENSG00000153786.13	ZDHHC7	0.714189	6.79378	8.25358	5.6824343312937e-08	2.37959658321743e-06	8.27959	Healthy-Active
ENSG00000117620.15	SLC35A3	1.14112	7.46231	8.24805	5.743847983412e-08	2.40205072858536e-06	8.22105	Healthy-Active
ENSG00000102109.9	PCSK1N	2.71703	3.18808	8.24652	5.76091714592651e-08	2.40592448989974e-06	8.52477	Healthy-Active
ENSG00000101017.14	CD40	-2.3045	3.41654	-8.24254	5.80567408409351e-08	2.42133533079629e-06	8.4908	Healthy-Active
ENSG00000120875.9	DUSP4	-2.85616	2.52137	-8.24084	5.82495875666781e-08	2.42480047381035e-06	8.53698	Healthy-Active
ENSG00000173821.19	RNF213	-0.882751	7.50658	-8.24018	5.83238210272394e-08	2.42480047381035e-06	8.20036	Healthy-Active
ENSG00000133687.16	TMTC1	-1.8504	3.47112	-8.23972	5.83758460649323e-08	2.42480047381035e-06	8.48988	Healthy-Active
ENSG00000198886.2	MT-ND4	1.34356	14.0245	8.23728	5.86536081780493e-08	2.43162690237341e-06	7.95863	Healthy-Active
ENSG00000111348.9	ARHGDIB	-1.81372	6.1066	-8.23597	5.88041738394252e-08	2.43162690237341e-06	8.2879	Healthy-Active
ENSG00000147853.17	AK3	0.831165	6.92982	8.23568	5.88370111062726e-08	2.43162690237341e-06	8.23477	Healthy-Active
ENSG00000117305.15	HMGCL	0.953957	5.99579	8.23501	5.89143931254878e-08	2.43162690237341e-06	8.29191	Healthy-Active
ENSG00000198561.15	CTNND1	1.12866	5.39357	8.23472	5.89472808257441e-08	2.43162690237341e-06	8.32926	Healthy-Active
ENSG00000167077.13	MEI1	-2.01301	3.26611	-8.23414	5.90135596825317e-08	2.43162690237341e-06	8.4953	Healthy-Active
ENSG00000136295.15	TTYH3	-1.43536	6.21731	-8.23241	5.9213236932019e-08	2.4365970300157e-06	8.27007	Healthy-Active
ENSG00000006118.15	TMEM132A	-2.62237	3.50739	-8.23088	5.93893293415596e-08	2.43700119241557e-06	8.46768	Healthy-Active
ENSG00000148175.13	STOM	-2.06598	6.18893	-8.23075	5.94047144430942e-08	2.43700119241557e-06	8.25464	Healthy-Active
ENSG00000091879.14	ANGPT2	-2.57525	2.06619	-8.23027	5.94602672430002e-08	2.43700119241557e-06	8.51799	Healthy-Active
ENSG00000211947.2	IGHV3-21	-2.70186	6.6009	-8.22695	5.98452498170985e-08	2.44716490054251e-06	8.23867	Healthy-Active
ENSG00000270170.2	NCBP2AS2	0.981799	4.49435	8.22677	5.98670495768811e-08	2.44716490054251e-06	8.38427	Healthy-Active
ENSG00000117118.10	SDHB	0.949536	6.29978	8.22565	5.99973233046356e-08	2.44924172393666e-06	8.25176	Healthy-Active
ENSG00000103522.16	IL21R	-3.63469	1.39322	-8.22342	6.02579451221779e-08	2.45662715160138e-06	8.48255	Healthy-Active
ENSG00000140931.20	CMTM3	-1.33283	3.70314	-8.21895	6.07848653858589e-08	2.47483531843799e-06	8.43703	Healthy-Active
ENSG00000198727.2	MT-CYB	1.2841	12.8295	8.21314	6.14776162488521e-08	2.49790453995604e-06	7.93816	Healthy-Active
ENSG00000080493.18	SLC4A4	2.52661	7.81058	8.21236	6.15708634732277e-08	2.49790453995604e-06	8.13413	Healthy-Active
ENSG00000132313.15	MRPL35	1.0416	6.20074	8.21216	6.15946092069236e-08	2.49790453995604e-06	8.2319	Healthy-Active
ENSG00000211970.3	IGHV4-61	-3.11619	4.44658	-8.21112	6.17203608044486e-08	2.49971516472262e-06	8.34621	Healthy-Active
ENSG00000128284.19	APOL3	-1.56472	4.64912	-8.20776	6.21255189468521e-08	2.51282233525056e-06	8.32407	Healthy-Active
ENSG00000273066.5	AL355987.4	2.38565	2.34989	8.2059	6.23513911345106e-08	2.51865298316743e-06	8.47278	Healthy-Active
ENSG00000123989.14	CHPF	-1.39972	5.51519	-8.2032	6.26809266084923e-08	2.52865031282767e-06	8.2614	Healthy-Active
ENSG00000169957.10	ZNF768	0.974454	5.67461	8.19703	6.3439425051904e-08	2.55590394709115e-06	8.24092	Healthy-Active
ENSG00000074410.14	CA12	1.73172	8.6146	8.19591	6.35783157784388e-08	2.55815570575361e-06	8.05589	Healthy-Active
ENSG00000093183.14	SEC22C	-1.00594	4.37069	-8.19214	6.40482959299785e-08	2.57284263495613e-06	8.33207	Healthy-Active
ENSG00000177106.16	EPS8L2	1.24699	7.46164	8.19118	6.416831485473e-08	2.57284263495613e-06	8.10998	Healthy-Active
ENSG00000158158.12	CNNM4	1.563	7.24202	8.1904	6.42655723253013e-08	2.57284263495613e-06	8.11908	Healthy-Active
ENSG00000276116.2	FUT8-AS1	-2.68714	-1.00177	-8.19031	6.4277240482665e-08	2.57284263495613e-06	8.02861	Healthy-Active
ENSG00000144837.9	PLA1A	-3.28106	0.108306	-8.18875	6.44731081935176e-08	2.57733549628068e-06	8.29355	Healthy-Active
ENSG00000110723.12	EXPH5	2.66604	4.99908	8.1872	6.46691414284067e-08	2.58182332637943e-06	8.26368	Healthy-Active
ENSG00000167693.17	NXN	-2.19537	2.99116	-8.18215	6.53097249303886e-08	2.60402462106017e-06	8.4113	Healthy-Active
ENSG00000173894.11	CBX2	-2.76149	0.247558	-8.17899	6.5713882233117e-08	2.61675395905284e-06	8.29186	Healthy-Active
ENSG00000156711.17	MAPK13	1.1318	7.2876	8.17669	6.60100191800733e-08	2.62409729268231e-06	8.08862	Healthy-Active
ENSG00000132849.21	PATJ	1.1924	6.54948	8.17624	6.6068573346792e-08	2.62409729268231e-06	8.14017	Healthy-Active
ENSG00000054690.14	PLEKHH1	1.4417	6.0434	8.17141	6.6694786978937e-08	2.64555988349783e-06	8.15673	Healthy-Active
ENSG00000169902.15	TPST1	-2.13728	2.36468	-8.16226	6.78986773764104e-08	2.68985235914954e-06	8.3897	Healthy-Active
ENSG00000120915.14	EPHX2	1.83487	6.24325	8.15999	6.82008577045003e-08	2.6983551159312e-06	8.13302	Healthy-Active
ENSG00000169432.18	SCN9A	2.17112	3.95999	8.1587	6.83727934255157e-08	2.70104256523524e-06	8.2938	Healthy-Active
ENSG00000267534.4	S1PR2	-1.80542	2.37353	-8.15817	6.84440557882199e-08	2.70104256523524e-06	8.38178	Healthy-Active
ENSG00000185133.14	INPP5J	2.50214	4.27299	8.15403	6.90006658824508e-08	2.71952624445398e-06	8.26159	Healthy-Active
ENSG00000205189.12	ZBTB10	1.29775	5.01977	8.15145	6.93495067165684e-08	2.72978435058921e-06	8.19372	Healthy-Active
ENSG00000214796.8	TUBA5P	1.96276	1.78389	8.14685	6.99774198435969e-08	2.7509873176014e-06	8.35406	Healthy-Active
ENSG00000057657.17	PRDM1	-1.40538	5.24345	-8.14387	7.03864804712805e-08	2.7635435854845e-06	8.16489	Healthy-Active
ENSG00000131370.16	SH3BP5	-1.94842	2.06785	-8.13775	7.12353752305804e-08	2.79331488547292e-06	8.34268	Healthy-Active
ENSG00000185432.12	METTL7A	1.05772	7.4013	8.13428	7.17217994816282e-08	2.80881522468013e-06	8.00702	Healthy-Active
ENSG00000010278.15	CD9	1.02758	8.67177	8.13288	7.19187341016534e-08	2.81295343115109e-06	7.92869	Healthy-Active
ENSG00000102024.18	PLS3	-1.41891	5.27273	-8.13166	7.20901993428303e-08	2.81608622806765e-06	8.14033	Healthy-Active
ENSG00000110042.8	DTX4	0.946112	7.00208	8.12997	7.23298821713392e-08	2.8196005301071e-06	8.01883	Healthy-Active
ENSG00000173660.12	UQCRH	0.728785	6.79594	8.12933	7.24204357012391e-08	2.8196005301071e-06	8.02857	Healthy-Active
ENSG00000211673.2	IGLV3-1	-2.79422	7.11392	-8.12909	7.24546127589899e-08	2.8196005301071e-06	8.01507	Healthy-Active
ENSG00000228672.4	PROB1	1.08434	3.95651	8.12718	7.27266930686267e-08	2.82661968104432e-06	8.22954	Healthy-Active
ENSG00000251039.2	IGKV2D-40	-3.40996	0.847342	-8.12524	7.30035093978804e-08	2.83380499137541e-06	8.28039	Healthy-Active
ENSG00000066629.18	EML1	-1.86884	3.46803	-8.1226	7.33818956478081e-08	2.84490994435358e-06	8.26649	Healthy-Active
ENSG00000110955.9	ATP5F1B	0.996729	9.6648	8.12129	7.35712889798483e-08	2.84866921815063e-06	7.85896	Healthy-Active
ENSG00000239713.9	APOBEC3G	-1.74241	3.34709	-8.12039	7.37018364562193e-08	2.84889813990245e-06	8.26006	Healthy-Active
ENSG00000130675.15	MNX1	1.79736	3.81798	8.11997	7.37620685779876e-08	2.84889813990245e-06	8.23128	Healthy-Active
ENSG00000197273.4	GUCA2A	4.35585	7.05721	8.11864	7.39551397081237e-08	2.84938780085884e-06	7.98841	Healthy-Active
ENSG00000106991.14	ENG	-1.84825	5.46818	-8.11861	7.39596457184087e-08	2.84938780085884e-06	8.10175	Healthy-Active
ENSG00000135636.14	DYSF	-2.69994	3.45409	-8.11316	7.4753841804478e-08	2.87638971068142e-06	8.24043	Healthy-Active
ENSG00000259237.1	LINC02490	4.43118	-0.998858	8.11203	7.4920598552927e-08	2.87921168079771e-06	7.83857	Healthy-Active
ENSG00000148584.15	A1CF	1.85988	5.98013	8.11073	7.51121708743243e-08	2.88113443389404e-06	8.04022	Healthy-Active
ENSG00000134817.11	APLNR	-2.39199	4.54061	-8.11029	7.5176425401133e-08	2.88113443389404e-06	8.15513	Healthy-Active
ENSG00000073350.14	LLGL2	1.29171	8.22781	8.10959	7.52801348076783e-08	2.88113443389404e-06	7.90244	Healthy-Active
ENSG00000101825.8	MXRA5	-1.88248	5.90839	-8.10907	7.53567478439063e-08	2.88113443389404e-06	8.05845	Healthy-Active
ENSG00000025708.14	TYMP	-2.10943	5.20947	-8.10852	7.54380288813632e-08	2.88113443389404e-06	8.08093	Healthy-Active
ENSG00000105135.16	ILVBL	0.796644	6.09828	8.10424	7.60748691548648e-08	2.90140097585268e-06	8.02548	Healthy-Active
ENSG00000007255.10	TRAPPC6A	0.950874	4.48811	8.10369	7.61569510874021e-08	2.90140097585268e-06	8.14673	Healthy-Active
ENSG00000151376.18	ME3	1.31348	4.69487	8.09888	7.68795285396344e-08	2.92531351743219e-06	8.12348	Healthy-Active
ENSG00000159871.15	LYPD5	-3.09215	0.335171	-8.09685	7.71862483367509e-08	2.93336295929346e-06	8.20541	Healthy-Active
ENSG00000180398.13	MCFD2	-0.801163	5.77149	-8.09491	7.74814193817179e-08	2.93852114450094e-06	8.02914	Healthy-Active
ENSG00000211893.4	IGHG2	-4.51337	7.77989	-8.09471	7.75126598903107e-08	2.93852114450094e-06	7.90425	Healthy-Active
ENSG00000129038.16	LOXL1	-2.49489	2.73856	-8.09349	7.76978121402813e-08	2.94192170512974e-06	8.253	Healthy-Active
ENSG00000146535.14	GNA12	-0.858231	5.40937	-8.08977	7.82687299356385e-08	2.9599024850875e-06	8.05101	Healthy-Active
ENSG00000138185.20	ENTPD1	-1.5071	4.85239	-8.08838	7.84824959318357e-08	2.96434927342538e-06	8.08974	Healthy-Active
ENSG00000150593.18	PDCD4	1.49892	8.58213	8.08715	7.86716132149895e-08	2.96785531321811e-06	7.84484	Healthy-Active
ENSG00000137266.15	SLC22A23	1.48489	6.36375	8.08604	7.88440210100924e-08	2.97072319260643e-06	7.97241	Healthy-Active
ENSG00000213949.10	ITGA1	-1.19125	5.94506	-8.08372	7.92039193070972e-08	2.97970038763041e-06	7.99786	Healthy-Active
ENSG00000005810.18	MYCBP2	-0.991851	5.40161	-8.08326	7.92756340760175e-08	2.97970038763041e-06	8.03607	Healthy-Active
ENSG00000268001.1	CARD8-AS1	-1.34658	2.24127	-8.08057	7.96960226750132e-08	2.99185275866819e-06	8.23412	Healthy-Active
ENSG00000184828.10	ZBTB7C	1.64745	5.78701	8.0798	7.98179059673664e-08	2.9927830654747e-06	7.99594	Healthy-Active
ENSG00000255248.9	MIR100HG	-2.38939	2.23326	-8.07814	8.00784321181575e-08	2.99585499280436e-06	8.22936	Healthy-Active
ENSG00000088256.9	GNA11	1.28539	7.68133	8.07804	8.00942381516108e-08	2.99585499280436e-06	7.86834	Healthy-Active
ENSG00000198873.12	GRK5	-1.70654	4.70028	-8.07301	8.08913112446033e-08	3.02200133802414e-06	8.06336	Healthy-Active
ENSG00000179091.5	CYC1	1.03293	7.4822	8.07176	8.10905561660742e-08	3.02577727795953e-06	7.86855	Healthy-Active
ENSG00000186340.17	THBS2	-5.31952	0.573068	-8.06991	8.1386519112494e-08	3.02879419156639e-06	8.07815	Healthy-Active
ENSG00000135414.10	GDF11	-1.43587	3.07107	-8.06973	8.14150179947534e-08	3.02879419156639e-06	8.18711	Healthy-Active
ENSG00000067955.15	CBFB	-0.763232	5.25845	-8.06941	8.14662205901346e-08	3.02879419156639e-06	8.01603	Healthy-Active
ENSG00000129518.9	EAPP	0.9662	5.47595	8.0642	8.2306467266502e-08	3.05634653930224e-06	7.98892	Healthy-Active
ENSG00000101236.17	RNF24	-1.71801	3.14203	-8.05823	8.32794162648123e-08	3.08615867712991e-06	8.15456	Healthy-Active
ENSG00000008853.17	RHOBTB2	-1.52875	2.69764	-8.05765	8.33739863138607e-08	3.08615867712991e-06	8.18322	Healthy-Active
ENSG00000285314.1	AC002470.2	4.25447	-2.55093	8.05743	8.3409693976484e-08	3.08615867712991e-06	7.15666	Healthy-Active
ENSG00000108622.11	ICAM2	-1.72753	2.16401	-8.05437	8.39144767881513e-08	3.09943257227793e-06	8.18411	Healthy-Active
ENSG00000113722.17	CDX1	1.34356	7.60253	8.05404	8.3969572624252e-08	3.09943257227793e-06	7.82579	Healthy-Active
ENSG00000000003.15	TSPAN6	1.46163	6.27606	8.05333	8.40863697630746e-08	3.10003110343029e-06	7.90366	Healthy-Active
ENSG00000211593.2	IGKJ5	-1.9274	1.98953	-8.0511	8.44579434011655e-08	3.10945596533917e-06	8.17689	Healthy-Active
ENSG00000116962.15	NID1	-1.83255	5.98606	-8.05022	8.46029702798767e-08	3.10945596533917e-06	7.93185	Healthy-Active
ENSG00000250067.12	YJEFN3	1.3731	3.31918	8.04976	8.46806581652567e-08	3.10945596533917e-06	8.12867	Healthy-Active
ENSG00000069122.19	ADGRF5	-2.1283	4.02521	-8.04937	8.47455634432661e-08	3.10945596533917e-06	8.07577	Healthy-Active
ENSG00000104972.15	LILRB1	-1.61204	2.74985	-8.04795	8.49832868946832e-08	3.11318817839179e-06	8.16047	Healthy-Active
ENSG00000135862.6	LAMC1	-1.49704	6.61625	-8.04713	8.51213403539597e-08	3.11318817839179e-06	7.88473	Healthy-Active
ENSG00000121905.10	HPCA	2.12072	0.52241	8.0466	8.52091756197036e-08	3.11318817839179e-06	8.08575	Healthy-Active
ENSG00000152763.17	DNAI4	1.81406	3.44243	8.04635	8.52513163934548e-08	3.11318817839179e-06	8.10979	Healthy-Active
ENSG00000116793.16	PHTF1	-1.12238	3.52289	-8.04318	8.57863121243681e-08	3.12849318574361e-06	8.09854	Healthy-Active
ENSG00000064666.15	CNN2	-1.22081	5.9004	-8.04247	8.59064675588729e-08	3.12849318574361e-06	7.91623	Healthy-Active
ENSG00000134824.14	FADS2	-3.08985	3.07794	-8.04206	8.59749433284072e-08	3.12849318574361e-06	8.13114	Healthy-Active
ENSG00000101265.16	RASSF2	-1.91756	4.82153	-8.03313	8.75039333259945e-08	3.18037585971754e-06	7.98329	Healthy-Active
ENSG00000198855.7	FICD	-1.3508	3.02273	-8.02746	8.84871619017434e-08	3.21232369490416e-06	8.10043	Healthy-Active
ENSG00000263429.3	TMEM238L	2.01838	1.74345	8.02371	8.91446663119387e-08	3.2323856004709e-06	8.12459	Healthy-Active
ENSG00000100985.7	MMP9	-3.74674	3.43498	-8.02284	8.92986508586627e-08	3.23416418109852e-06	8.06134	Healthy-Active
ENSG00000206075.14	SERPINB5	-3.58929	3.43125	-8.0209	8.9641063152953e-08	3.24275493830653e-06	8.06098	Healthy-Active
ENSG00000137265.15	IRF4	-1.9808	5.60571	-8.01889	8.99983346807278e-08	3.25186245392112e-06	7.89722	Healthy-Active
ENSG00000143390.18	RFX5	-0.806985	5.13697	-8.01406	9.08598967674558e-08	3.27582138755087e-06	7.91649	Healthy-Active
ENSG00000187021.15	PNLIPRP1	3.9021	-0.93826	8.01399	9.08739913161802e-08	3.27582138755087e-06	7.64898	Healthy-Active
ENSG00000138411.13	HECW2	-2.19185	1.8716	-8.01299	9.1053138029801e-08	3.2784448215146e-06	8.101	Healthy-Active
ENSG00000196689.12	TRPV1	1.27088	3.11931	8.0104	9.15196874154953e-08	3.28873820709318e-06	8.06768	Healthy-Active
ENSG00000092929.12	UNC13D	-1.46721	5.71339	-8.01022	9.15524279447763e-08	3.28873820709318e-06	7.86241	Healthy-Active
ENSG00000135045.7	C9orf40	1.28092	3.84912	8.00833	9.18955571700483e-08	3.29504676804607e-06	8.00237	Healthy-Active
ENSG00000105755.8	ETHE1	1.70561	6.29192	8.00807	9.19418649790603e-08	3.29504676804607e-06	7.81357	Healthy-Active
ENSG00000130517.14	PGPEP1	0.832837	6.53124	8.00675	9.21823742795907e-08	3.29982921913039e-06	7.80564	Healthy-Active
ENSG00000115170.15	ACVR1	-1.01655	4.22311	-8.0049	9.25197016594846e-08	3.3054233897232e-06	7.96811	Healthy-Active
ENSG00000059377.18	TBXAS1	-1.3352	4.03876	-8.00459	9.25771646007221e-08	3.3054233897232e-06	7.98098	Healthy-Active
ENSG00000152078.10	TLCD4	2.04091	5.77868	8.00413	9.26603876811539e-08	3.3054233897232e-06	7.84007	Healthy-Active
ENSG00000168404.13	MLKL	-1.06357	4.6546	-8.00039	9.33493090012097e-08	3.32614919390322e-06	7.9187	Healthy-Active
ENSG00000140832.10	MARVELD3	1.34881	6.08544	7.99834	9.37282376923315e-08	3.33559680548063e-06	7.81299	Healthy-Active
ENSG00000254695.2	AC087379.2	4.38848	-2.07788	7.99723	9.39340957548475e-08	3.33559680548063e-06	7.11768	Healthy-Active
ENSG00000136044.12	APPL2	1.3916	7.15063	7.9972	9.39391332908468e-08	3.33559680548063e-06	7.74153	Healthy-Active
ENSG00000173080.6	RXFP4	2.28106	1.38325	7.99629	9.41098072158948e-08	3.33619294479048e-06	8.05313	Healthy-Active
ENSG00000136436.15	CALCOCO2	0.800759	7.23849	7.99595	9.41724104333968e-08	3.33619294479048e-06	7.73576	Healthy-Active
ENSG00000151702.17	FLI1	-1.63715	4.40354	-7.98941	9.53979286641964e-08	3.37201899364666e-06	7.92506	Healthy-Active
ENSG00000204370.13	SDHD	0.997914	6.69746	7.98939	9.54025035676938e-08	3.37201899364666e-06	7.75274	Healthy-Active
ENSG00000197860.10	SGTB	-1.32198	2.69188	-7.98767	9.5727110395369e-08	3.37961657445094e-06	8.04491	Healthy-Active
ENSG00000060237.19	WNK1	-0.570531	6.62286	-7.98262	9.66895527343882e-08	3.40867766442506e-06	7.74987	Healthy-Active
ENSG00000122786.20	CALD1	-1.67826	7.22339	-7.98219	9.67714531122264e-08	3.40867766442506e-06	7.71714	Healthy-Active
ENSG00000127507.18	ADGRE2	-2.55608	2.8155	-7.98021	9.71525323895798e-08	3.41819429312698e-06	8.01726	Healthy-Active
ENSG00000127554.13	GFER	0.72753	4.23605	7.97789	9.75982385250404e-08	3.42996044421924e-06	7.91615	Healthy-Active
ENSG00000141424.13	SLC39A6	-1.12146	4.66621	-7.97574	9.80158627357418e-08	3.43277901337428e-06	7.88064	Healthy-Active
ENSG00000137868.19	STRA6	-5.87762	-2.48633	-7.97529	9.81024148707713e-08	3.43277901337428e-06	6.86699	Healthy-Active
ENSG00000166033.13	HTRA1	-2.05367	4.27926	-7.97511	9.81382582763108e-08	3.43277901337428e-06	7.91647	Healthy-Active
ENSG00000111817.19	DSE	-1.34181	4.10961	-7.97462	9.82340481841289e-08	3.43277901337428e-06	7.92116	Healthy-Active
ENSG00000144711.16	IQSEC1	-1.15401	5.58495	-7.97461	9.82353294765296e-08	3.43277901337428e-06	7.81011	Healthy-Active
ENSG00000183034.13	OTOP2	5.20019	4.27928	7.97321	9.85085176402033e-08	3.43842697869616e-06	7.88942	Healthy-Active
ENSG00000178623.12	GPR35	0.991347	5.5178	7.96835	9.94611146773445e-08	3.46775001750049e-06	7.7954	Healthy-Active
ENSG00000163683.12	SMIM14	1.16072	7.68664	7.96227	1.00666145439793e-07	3.50579804361565e-06	7.6401	Healthy-Active
ENSG00000161267.12	BDH1	1.66218	5.7372	7.95837	1.01447742530538e-07	3.52585068877728e-06	7.75233	Healthy-Active
ENSG00000157823.17	AP3S2	1.28038	5.10928	7.95826	1.01470736217042e-07	3.52585068877728e-06	7.80751	Healthy-Active
ENSG00000044012.4	GUCA2B	4.37529	5.06366	7.95212	1.02713562753162e-07	3.56501657389098e-06	7.78493	Healthy-Active
ENSG00000242371.1	IGKV1-39	-2.45278	7.839	-7.94857	1.03440855851581e-07	3.58622116783081e-06	7.60726	Healthy-Active
ENSG00000204131.9	NHSL2	-2.16101	2.23963	-7.94738	1.03684460747259e-07	3.58792315963573e-06	7.97822	Healthy-Active
ENSG00000182809.11	CRIP2	-2.01335	4.48466	-7.94719	1.0372371770328e-07	3.58792315963573e-06	7.84077	Healthy-Active
ENSG00000131069.20	ACSS2	1.57601	7.76671	7.94663	1.03839182972489e-07	3.58792315963573e-06	7.60074	Healthy-Active
ENSG00000112759.19	SLC29A1	-1.3372	4.16659	-7.94288	1.04614608520678e-07	3.61066836418345e-06	7.85168	Healthy-Active
ENSG00000141736.14	ERBB2	1.22619	7.76716	7.93907	1.05408929974496e-07	3.63401412834891e-06	7.58885	Healthy-Active
ENSG00000103710.11	RASL12	-1.82667	2.83462	-7.93791	1.05652880281201e-07	3.63829652991495e-06	7.94521	Healthy-Active
ENSG00000178814.17	OPLAH	1.26491	5.20645	7.93735	1.05769238207839e-07	3.63829652991495e-06	7.75904	Healthy-Active
ENSG00000278908.1	AC132154.1	3.27781	-4.21077	7.93657	1.05934386434967e-07	3.63991496578833e-06	6.37149	Healthy-Active
ENSG00000165424.7	ZCCHC24	-1.5387	4.39233	-7.93308	1.06670142691101e-07	3.6611141067733e-06	7.82035	Healthy-Active
ENSG00000125967.17	NECAB3	1.04062	4.62054	7.93188	1.06925108876657e-07	3.66578284837312e-06	7.79763	Healthy-Active
ENSG00000162512.16	SDC3	-1.3483	5.40786	-7.93024	1.07274219499411e-07	3.67366524354593e-06	7.72385	Healthy-Active
ENSG00000160746.13	ANO10	0.991383	5.83892	7.9249	1.08418828946056e-07	3.70874220526791e-06	7.68461	Healthy-Active
ENSG00000138435.16	CHRNA1	2.80516	0.561047	7.91998	1.09483953062851e-07	3.73933985820465e-06	7.79055	Healthy-Active
ENSG00000243279.4	PRAF2	-1.71325	0.572802	-7.91912	1.09671191098736e-07	3.73933985820465e-06	7.83764	Healthy-Active
ENSG00000160255.18	ITGB2	-1.93226	5.67997	-7.91909	1.09677273022193e-07	3.73933985820465e-06	7.68328	Healthy-Active
ENSG00000034053.14	APBA2	-2.80207	0.973567	-7.9182	1.09872538556266e-07	3.74185802303057e-06	7.88269	Healthy-Active
ENSG00000166387.13	PPFIBP2	0.781388	5.75975	7.91422	1.10744127662107e-07	3.76737832083201e-06	7.66986	Healthy-Active
ENSG00000085265.11	FCN1	-4.68811	0.744473	-7.91225	1.11180274576886e-07	3.77502497452131e-06	7.87627	Healthy-Active
ENSG00000063245.15	EPN1	0.687768	7.66476	7.91209	1.11213936250657e-07	3.77502497452131e-06	7.54019	Healthy-Active
ENSG00000211594.2	IGKJ4	-1.9298	2.00292	-7.91154	1.11336351897728e-07	3.77502497452131e-06	7.90898	Healthy-Active
ENSG00000074416.14	MGLL	1.15711	8.4539	7.91015	1.11644805475066e-07	3.78132368082089e-06	7.49042	Healthy-Active
ENSG00000166446.15	CDYL2	-1.47898	2.92704	-7.90823	1.12071922756653e-07	3.79162319570013e-06	7.87995	Healthy-Active
ENSG00000089022.14	MAPKAPK5	0.787804	5.57989	7.90504	1.12786318493557e-07	3.81160868672141e-06	7.66314	Healthy-Active
ENSG00000162654.9	GBP4	-1.89756	4.73042	-7.90347	1.13139033537752e-07	3.81614607242477e-06	7.70532	Healthy-Active
ENSG00000232434.2	AJM1	1.23491	4.31585	7.9029	1.13267739590899e-07	3.81614607242477e-06	7.76239	Healthy-Active
ENSG00000184497.13	TMEM255B	-1.97418	2.08131	-7.90216	1.13433519943161e-07	3.81614607242477e-06	7.89153	Healthy-Active
ENSG00000126822.17	PLEKHG3	0.848209	5.86889	7.9019	1.13494032815603e-07	3.81614607242477e-06	7.63789	Healthy-Active
ENSG00000262877.5	AC110285.2	1.79216	2.67156	7.90169	1.1353966284071e-07	3.81614607242477e-06	7.87427	Healthy-Active
ENSG00000101445.10	PPP1R16B	-1.81889	4.55695	-7.90013	1.13894252541445e-07	3.82389407143777e-06	7.73532	Healthy-Active
ENSG00000157110.16	RBPMS	-1.6334	4.43087	-7.89865	1.14230175798848e-07	3.82826202858131e-06	7.7468	Healthy-Active
ENSG00000121057.13	AKAP1	1.27163	7.35231	7.89846	1.14272770717848e-07	3.82826202858131e-06	7.52694	Healthy-Active
ENSG00000157554.19	ERG	-1.87495	3.03295	-7.89446	1.1518589741685e-07	3.85466291453283e-06	7.84544	Healthy-Active
ENSG00000115594.12	IL1R1	-1.40523	6.18431	-7.89302	1.1551731543387e-07	3.85860896588631e-06	7.59999	Healthy-Active
ENSG00000166750.10	SLFN5	-1.90537	5.21191	-7.89286	1.15554202508454e-07	3.85860896588631e-06	7.65635	Healthy-Active
ENSG00000148730.7	EIF4EBP2	0.932729	8.16058	7.89068	1.16056678979174e-07	3.87119361776744e-06	7.4711	Healthy-Active
ENSG00000271952.2	LINC01954	4.65065	-2.11125	7.8882	1.1663160265198e-07	3.88616500036398e-06	6.9926	Healthy-Active
ENSG00000117266.16	CDK18	1.19098	5.10883	7.88343	1.17746650776771e-07	3.9190815589534e-06	7.65912	Healthy-Active
ENSG00000179403.12	VWA1	-1.64144	5.45916	-7.8822	1.18034846016801e-07	3.92443580267942e-06	7.6203	Healthy-Active
ENSG00000160685.13	ZBTB7B	1.05767	7.58846	7.88023	1.18498868167976e-07	3.93561812047973e-06	7.47934	Healthy-Active
ENSG00000128340.15	RAC2	-1.877	5.24529	-7.87869	1.1886298717766e-07	3.94321955608695e-06	7.6346	Healthy-Active
ENSG00000219438.9	TAFA5	-2.3988	-0.0262566	-7.87765	1.19110845067972e-07	3.94321955608695e-06	7.64461	Healthy-Active
ENSG00000253313.6	C1orf210	1.59097	5.45347	7.87764	1.1911156051773e-07	3.94321955608695e-06	7.61304	Healthy-Active
ENSG00000101144.13	BMP7	-1.92994	2.50942	-7.87652	1.19379611327573e-07	3.94785300507202e-06	7.83486	Healthy-Active
ENSG00000163251.4	FZD5	1.59145	7.1758	7.87346	1.20108566790875e-07	3.96770218334573e-06	7.4844	Healthy-Active
ENSG00000024422.12	EHD2	-1.91764	5.1219	-7.86874	1.21246862851715e-07	4.00101665947826e-06	7.63515	Healthy-Active
ENSG00000198417.7	MT1F	3.0866	3.8693	7.8678	1.21473641807733e-07	4.00125997360833e-06	7.74352	Healthy-Active
ENSG00000115165.10	CYTIP	-1.81147	3.94782	-7.86729	1.21596584591672e-07	4.00125997360833e-06	7.71771	Healthy-Active
ENSG00000099624.8	ATP5F1D	0.814775	6.14746	7.8671	1.21643703814639e-07	4.00125997360833e-06	7.54491	Healthy-Active
ENSG00000100412.17	ACO2	1.02635	7.07176	7.86622	1.21857337722597e-07	4.00401386561638e-06	7.48109	Healthy-Active
ENSG00000262406.3	MMP12	-3.91257	4.48105	-7.8652	1.22104586264971e-07	4.00786523245226e-06	7.64722	Healthy-Active
ENSG00000164088.18	PPM1M	-1.42015	3.63839	-7.86452	1.22270411154006e-07	4.00903866189108e-06	7.74414	Healthy-Active
ENSG00000163536.13	SERPINI1	-2.26841	1.48888	-7.86355	1.22508108205901e-07	4.0125636588885e-06	7.80732	Healthy-Active
ENSG00000141448.11	GATA6	1.21937	5.23592	7.86141	1.230319296674e-07	4.02451645705479e-06	7.59802	Healthy-Active
ENSG00000150457.9	LATS2	-1.30929	3.92533	-7.86036	1.23290296669709e-07	4.02451645705479e-06	7.70651	Healthy-Active
ENSG00000165475.15	CRYL1	1.13341	6.14335	7.86028	1.23308871941781e-07	4.02451645705479e-06	7.52996	Healthy-Active
ENSG00000115616.3	SLC9A2	2.10355	6.27857	7.85993	1.23395349012581e-07	4.02451645705479e-06	7.51581	Healthy-Active
ENSG00000008382.16	MPND	1.03894	4.19667	7.85751	1.23994954824388e-07	4.03593753244541e-06	7.67588	Healthy-Active
ENSG00000162664.17	ZNF326	0.76412	5.90175	7.85745	1.24007424912423e-07	4.03593753244541e-06	7.54115	Healthy-Active
ENSG00000149948.14	HMGA2	1.50911	3.31318	7.85675	1.24182283493695e-07	4.03616768210043e-06	7.75042	Healthy-Active
ENSG00000101294.18	HM13	-0.91492	6.37175	-7.85637	1.24276406680942e-07	4.03616768210043e-06	7.50633	Healthy-Active
ENSG00000275897.1	AC021491.4	4.06552	-0.100401	7.85398	1.24871294275557e-07	4.05121911670205e-06	7.63313	Healthy-Active
ENSG00000010810.17	FYN	-1.89515	4.6566	-7.85324	1.25056407741426e-07	4.05295850998789e-06	7.63282	Healthy-Active
ENSG00000050730.16	TNIP3	-4.83223	1.27557	-7.85114	1.25580231315414e-07	4.06257220864897e-06	7.79243	Healthy-Active
ENSG00000109458.8	GAB1	1.02673	5.92469	7.851	1.25616667688994e-07	4.06257220864897e-06	7.52991	Healthy-Active
ENSG00000051108.15	HERPUD1	-0.868608	7.50535	-7.84949	1.25996286495951e-07	4.07057814055735e-06	7.42165	Healthy-Active
ENSG00000145391.14	SETD7	-1.00551	5.6346	-7.84665	1.26713107717856e-07	4.08944994028487e-06	7.53483	Healthy-Active
ENSG00000023902.14	PLEKHO1	-1.54483	4.70877	-7.84609	1.26854006777908e-07	4.08971479383045e-06	7.60957	Healthy-Active
ENSG00000112541.18	PDE10A	-2.6724	0.963512	-7.84541	1.27027165571564e-07	4.09101804606183e-06	7.74226	Healthy-Active
ENSG00000119042.17	SATB2	2.16358	7.01859	7.8447	1.27207535994981e-07	4.09255059175501e-06	7.43431	Healthy-Active
ENSG00000129451.12	KLK10	-5.09349	0.177091	-7.83961	1.28508252667918e-07	4.13008639778717e-06	7.54656	Healthy-Active
ENSG00000287750.1	AL353572.4	2.19976	1.00476	7.83882	1.2871014984106e-07	4.13226617526177e-06	7.741	Healthy-Active
ENSG00000084754.12	HADHA	0.809326	8.17667	7.83591	1.29461644819462e-07	4.14598379600682e-06	7.35403	Healthy-Active
ENSG00000178033.6	CALHM5	-1.82553	1.57557	-7.83541	1.29590450898969e-07	4.14598379600682e-06	7.7535	Healthy-Active
ENSG00000166741.8	NNMT	-3.01411	2.98591	-7.83532	1.29613987348325e-07	4.14598379600682e-06	7.72585	Healthy-Active
ENSG00000211904.2	IGHJ2	-3.60548	-1.88536	-7.83508	1.29675493311397e-07	4.14598379600682e-06	7.12702	Healthy-Active
ENSG00000065923.10	SLC9A7	-1.59191	2.48513	-7.83331	1.30136557720049e-07	4.15641331138821e-06	7.74854	Healthy-Active
ENSG00000109670.16	FBXW7	-0.932052	4.90059	-7.83108	1.30717727394523e-07	4.16904281230428e-06	7.56924	Healthy-Active
ENSG00000234690.7	EPCAM-DT	2.07253	1.99744	7.83076	1.30802517747583e-07	4.16904281230428e-06	7.75264	Healthy-Active
ENSG00000125810.10	CD93	-2.05179	5.55328	-7.82238	1.33012398890755e-07	4.23509829154127e-06	7.50194	Healthy-Active
ENSG00000123685.9	BATF3	-2.41929	0.592419	-7.82161	1.3321746289898e-07	4.23725017957634e-06	7.66473	Healthy-Active
ENSG00000253755.1	IGHGP	-7.27465	2.70573	-7.81876	1.33981505770842e-07	4.25715875192074e-06	7.70853	Healthy-Active
ENSG00000114779.20	ABHD14B	0.735045	5.76796	7.81791	1.34209686560021e-07	4.26001724970794e-06	7.47557	Healthy-Active
ENSG00000166670.10	MMP10	-6.98299	-1.16986	-7.81296	1.35544100201959e-07	4.29794723490182e-06	7.46987	Healthy-Active
ENSG00000140990.15	NDUFB10	0.782681	5.93021	7.81183	1.35852764328486e-07	4.30101601136639e-06	7.45005	Healthy-Active
ENSG00000180543.5	TSPYL5	-1.40442	2.23378	-7.81157	1.35922139490409e-07	4.30101601136639e-06	7.71413	Healthy-Active
ENSG00000178741.12	COX5A	1.12094	7.11796	7.81107	1.36059524709848e-07	4.30101601136639e-06	7.36267	Healthy-Active
ENSG00000117228.11	GBP1	-1.85119	4.98358	-7.81034	1.36258584779825e-07	4.30289532940471e-06	7.4967	Healthy-Active
ENSG00000168542.16	COL3A1	-2.27641	9.74806	-7.80937	1.36522025457293e-07	4.30680178773717e-06	7.2353	Healthy-Active
ENSG00000145423.5	SFRP2	-5.36169	-0.584047	-7.80827	1.36823402887254e-07	4.30714349581482e-06	7.2661	Healthy-Active
ENSG00000134285.11	FKBP11	-1.36678	4.99084	-7.80788	1.36930493193418e-07	4.30714349581482e-06	7.51411	Healthy-Active
ENSG00000211666.2	IGLV2-14	-2.47383	8.23246	-7.8078	1.36952098436083e-07	4.30714349581482e-06	7.2976	Healthy-Active
ENSG00000242247.11	ARFGAP3	-1.26497	5.67694	-7.80611	1.37417593449572e-07	4.31737782641106e-06	7.45069	Healthy-Active
ENSG00000112679.14	DUSP22	-0.73872	5.21627	-7.80363	1.38101068073978e-07	4.32613209152839e-06	7.49075	Healthy-Active
ENSG00000286346.1	AC021613.3	4.90249	-1.44528	7.80355	1.38125397752803e-07	4.32613209152839e-06	7.28002	Healthy-Active
ENSG00000161798.7	AQP5	-4.62943	-4.24187	-7.80303	1.38267507983518e-07	4.32613209152839e-06	6.12085	Healthy-Active
ENSG00000116171.19	SCP2	0.822781	7.70635	7.80282	1.38327196596588e-07	4.32613209152839e-06	7.31334	Healthy-Active
ENSG00000048471.14	SNX29	-1.16021	4.09287	-7.80256	1.38398048157003e-07	4.32613209152839e-06	7.57947	Healthy-Active
ENSG00000159618.16	ADGRG5	-1.65984	2.73865	-7.8012	1.3877675334957e-07	4.32988118429374e-06	7.67403	Healthy-Active
ENSG00000171100.15	MTM1	1.29813	5.68274	7.80112	1.38798955584901e-07	4.32988118429374e-06	7.44125	Healthy-Active
ENSG00000250073.3	AP000866.2	1.42367	1.78505	7.80013	1.39074999122867e-07	4.33155743186727e-06	7.69267	Healthy-Active
ENSG00000277972.2	CISD3	0.987871	5.93077	7.79992	1.39133767805996e-07	4.33155743186727e-06	7.42047	Healthy-Active
ENSG00000198964.14	SGMS1	-1.02638	4.51516	-7.79727	1.39874372685484e-07	4.35022002072585e-06	7.52022	Healthy-Active
ENSG00000137478.15	FCHSD2	-1.0163	4.53301	-7.79527	1.40436983650248e-07	4.36331479141562e-06	7.52826	Healthy-Active
ENSG00000229719.5	MIR194-2HG	1.84155	5.47297	7.79255	1.41203637352764e-07	4.3827163210972e-06	7.43867	Healthy-Active
ENSG00000138095.19	LRPPRC	0.864724	7.33272	7.78856	1.42337217185968e-07	4.41345610753392e-06	7.30622	Healthy-Active
ENSG00000087245.13	MMP2	-2.58172	7.21637	-7.78805	1.42484583882663e-07	4.41358528627896e-06	7.32803	Healthy-Active
ENSG00000184434.8	LRRC19	1.98011	6.88737	7.7874	1.42668197624447e-07	4.4148358624328e-06	7.32711	Healthy-Active
ENSG00000071205.12	ARHGAP10	-1.2505	2.56368	-7.78642	1.42950589947534e-07	4.41851643311967e-06	7.65754	Healthy-Active
ENSG00000111450.14	STX2	-1.38817	3.18731	-7.78599	1.43073858740905e-07	4.41851643311967e-06	7.62759	Healthy-Active
ENSG00000210082.2	MT-RNR2	1.29222	14.6312	7.78508	1.4333505813241e-07	4.42215197867767e-06	7.02695	Healthy-Active
ENSG00000163739.5	CXCL1	-4.93206	3.72164	-7.784	1.43644614295546e-07	4.42727065720303e-06	7.53012	Healthy-Active
ENSG00000152137.8	HSPB8	-2.47984	1.63761	-7.77423	1.46490876995119e-07	4.51048483503152e-06	7.63319	Healthy-Active
ENSG00000054967.13	RELT	-1.92008	2.14455	-7.77354	1.46693740258654e-07	4.51222332186824e-06	7.64094	Healthy-Active
ENSG00000020129.16	NCDN	-0.965053	3.64469	-7.76758	1.48458722752679e-07	4.55991054675099e-06	7.54413	Healthy-Active
ENSG00000198879.12	SFMBT2	-1.31314	3.94273	-7.76731	1.4853996265332e-07	4.55991054675099e-06	7.52178	Healthy-Active
ENSG00000127995.17	CASD1	1.04355	5.87557	7.7665	1.48780965821862e-07	4.56276432596577e-06	7.36074	Healthy-Active
ENSG00000114450.11	GNB4	-1.32555	3.92363	-7.76436	1.49422699904786e-07	4.57788969559187e-06	7.513	Healthy-Active
ENSG00000146039.11	SLC17A4	2.9618	5.94625	7.76373	1.49613139066725e-07	4.57917235270657e-06	7.34361	Healthy-Active
ENSG00000147251.16	DOCK11	-1.48952	4.00231	-7.76248	1.499877912883e-07	4.58207696160098e-06	7.50595	Healthy-Active
ENSG00000169604.21	ANTXR1	-1.67434	5.758	-7.76242	1.50005374720333e-07	4.58207696160098e-06	7.37296	Healthy-Active
ENSG00000177409.12	SAMD9L	-1.53078	5.31122	-7.76179	1.50196217346308e-07	4.58336397507978e-06	7.37232	Healthy-Active
ENSG00000250137.1	AC093607.1	3.20647	0.0488097	7.76059	1.50558226113613e-07	4.58986655494328e-06	7.43134	Healthy-Active
ENSG00000112414.15	ADGRG6	-1.60354	4.83308	-7.75301	1.52871277675565e-07	4.6557763332397e-06	7.3993	Healthy-Active
ENSG00000186198.4	SLC51B	2.35872	4.74487	7.75238	1.53062639319604e-07	4.65681930284951e-06	7.40708	Healthy-Active
ENSG00000128578.10	STRIP2	-2.83282	1.22236	-7.75191	1.53207708156432e-07	4.65681930284951e-06	7.59346	Healthy-Active
ENSG00000026652.15	AGPAT4	-1.91233	3.14371	-7.75129	1.53399253599677e-07	4.65804767999571e-06	7.53523	Healthy-Active
ENSG00000278192.1	AL118505.1	2.67417	1.2019	7.74969	1.53895600329537e-07	4.66851997810695e-06	7.58288	Healthy-Active
ENSG00000178860.9	MSC	-2.37781	1.84706	-7.74635	1.54932697589092e-07	4.694939093769e-06	7.5893	Healthy-Active
ENSG00000185567.7	AHNAK2	-2.36576	2.88536	-7.74579	1.5510589294844e-07	4.694939093769e-06	7.567	Healthy-Active
ENSG00000198478.8	SH3BGRL2	1.3974	7.52539	7.74541	1.55223481929548e-07	4.694939093769e-06	7.20082	Healthy-Active
ENSG00000140254.12	DUOXA1	-4.00317	-1.3418	-7.74287	1.56021363295489e-07	4.71444552757868e-06	7.29383	Healthy-Active
ENSG00000182271.13	TMIGD1	4.40527	5.85503	7.74062	1.56727866289039e-07	4.73115530547941e-06	7.31676	Healthy-Active
ENSG00000121989.15	ACVR2A	0.862145	4.33681	7.73783	1.57609716338747e-07	4.75154086513349e-06	7.42278	Healthy-Active
ENSG00000038427.16	VCAN	-1.77665	5.55544	-7.73751	1.57711505305849e-07	4.75154086513349e-06	7.33583	Healthy-Active
ENSG00000076662.10	ICAM3	-2.20979	1.50748	-7.73378	1.58900797087374e-07	4.78041740439288e-06	7.55793	Healthy-Active
ENSG00000184588.18	PDE4B	-2.37849	3.41052	-7.73353	1.58980170646725e-07	4.78041740439288e-06	7.48568	Healthy-Active
ENSG00000106524.9	ANKMY2	0.712122	4.95951	7.73251	1.59306949634053e-07	4.78557455620969e-06	7.36186	Healthy-Active
ENSG00000196782.12	MAML3	0.95444	4.33519	7.73189	1.5950553038891e-07	4.78687434480682e-06	7.41405	Healthy-Active
ENSG00000101347.10	SAMHD1	-0.942261	6.29273	-7.72943	1.60297808716757e-07	4.80597155881241e-06	7.2531	Healthy-Active
ENSG00000167363.14	FN3K	1.27728	4.92675	7.72893	1.60458047389666e-07	4.80610056229047e-06	7.35887	Healthy-Active
ENSG00000185215.11	TNFAIP2	-1.73448	5.93109	-7.72801	1.6075637935721e-07	4.81036152249375e-06	7.2735	Healthy-Active
ENSG00000028277.21	POU2F2	-2.58554	4.29905	-7.72592	1.61436314691049e-07	4.82249005057249e-06	7.41818	Healthy-Active
ENSG00000152234.16	ATP5F1A	0.75885	8.89476	7.7258	1.61474635222439e-07	4.82249005057249e-06	7.09158	Healthy-Active
ENSG00000172935.9	MRGPRF	-2.32877	2.33056	-7.72404	1.62047815582629e-07	4.83492325660425e-06	7.54278	Healthy-Active
ENSG00000160972.9	PPP1R16A	0.98167	5.48904	7.7235	1.62222317807403e-07	4.83544879800963e-06	7.29883	Healthy-Active
ENSG00000134324.12	LPIN1	-1.31213	5.24873	-7.72162	1.62838236328611e-07	4.8422586277153e-06	7.30877	Healthy-Active
ENSG00000242498.8	ARPIN	0.913474	6.11985	7.72143	1.62901610100713e-07	4.8422586277153e-06	7.25231	Healthy-Active
ENSG00000115425.14	PECR	1.1929	3.96685	7.72137	1.62922104958981e-07	4.8422586277153e-06	7.42425	Healthy-Active
ENSG00000165886.5	UBTD1	-2.27083	1.25716	-7.71954	1.63522669675587e-07	4.85542601355614e-06	7.51626	Healthy-Active
ENSG00000198162.12	MAN1A2	-0.561188	6.37157	-7.71805	1.64015491089701e-07	4.86537194501989e-06	7.22595	Healthy-Active
ENSG00000126561.18	STAT5A	-1.03849	5.20046	-7.71605	1.64678100295499e-07	4.87908738742052e-06	7.30829	Healthy-Active
ENSG00000253234.1	IGLV2-5	-2.33873	0.782236	-7.7157	1.64794457360396e-07	4.87908738742052e-06	7.46884	Healthy-Active
ENSG00000172575.12	RASGRP1	-1.85184	2.4372	-7.71027	1.6660718541588e-07	4.92013368041625e-06	7.50532	Healthy-Active
ENSG00000196642.19	RABL6	0.620515	7.17589	7.71019	1.66634640437602e-07	4.92013368041625e-06	7.15966	Healthy-Active
ENSG00000198840.2	MT-ND3	1.44958	10.7692	7.71011	1.66659730779487e-07	4.92013368041625e-06	6.98271	Healthy-Active
ENSG00000197301.7	HMGA2-AS1	2.26988	-0.305017	7.70692	1.67736323663963e-07	4.94717821210239e-06	7.33206	Healthy-Active
ENSG00000169021.6	UQCRFS1	0.887596	6.58644	7.70385	1.6877842496998e-07	4.97315471892903e-06	7.17855	Healthy-Active
ENSG00000153814.13	JAZF1	-1.31478	2.90464	-7.70281	1.69132550295004e-07	4.97465527541416e-06	7.47878	Healthy-Active
ENSG00000086300.16	SNX10	-1.95178	2.69338	-7.70275	1.69152160171118e-07	4.97465527541416e-06	7.47788	Healthy-Active
ENSG00000172115.9	CYCS	1.08845	8.41714	7.70038	1.69963317969233e-07	4.99312055867566e-06	7.06113	Healthy-Active
ENSG00000225614.4	ZNF469	-2.5695	1.63301	-7.69997	1.70104039019157e-07	4.99312055867566e-06	7.49658	Healthy-Active
ENSG00000205629.12	LCMT1	0.764885	4.66892	7.6973	1.71022670299269e-07	5.01530896412346e-06	7.31126	Healthy-Active
ENSG00000109814.12	UGDH	1.41763	7.46948	7.69578	1.71548778866743e-07	5.02595524092385e-06	7.10044	Healthy-Active
ENSG00000225953.3	SATB2-AS1	3.40511	4.96928	7.69511	1.71782542131089e-07	5.02802443591862e-06	7.2647	Healthy-Active
ENSG00000184313.20	MROH7	2.54965	1.13729	7.69242	1.72715637521791e-07	5.05053952946787e-06	7.46919	Healthy-Active
ENSG00000049759.20	NEDD4L	1.56173	7.01413	7.69068	1.7332274068106e-07	5.06348833225684e-06	7.12799	Healthy-Active
ENSG00000224389.9	C4B	-3.49149	2.25858	-7.68973	1.7365644705308e-07	5.06409352201313e-06	7.47221	Healthy-Active
ENSG00000164691.18	TAGAP	-2.22873	3.11653	-7.68969	1.73672069458093e-07	5.06409352201313e-06	7.42622	Healthy-Active
ENSG00000143799.14	PARP1	-0.779536	6.60394	-7.68584	1.75027237908363e-07	5.09878497124165e-06	7.14531	Healthy-Active
ENSG00000154518.10	ATP5MC3	0.988969	7.71598	7.68425	1.75589404029505e-07	5.11033146514956e-06	7.06638	Healthy-Active
ENSG00000149823.9	VPS51	0.634661	6.78104	7.6836	1.75818982631866e-07	5.11218572046863e-06	7.13029	Healthy-Active
ENSG00000115112.8	TFCP2L1	1.6427	7.14403	7.67962	1.77239817621469e-07	5.14864129963366e-06	7.09637	Healthy-Active
ENSG00000143479.17	DYRK3	-1.94362	1.90134	-7.67905	1.7744253323108e-07	5.14967638108768e-06	7.45788	Healthy-Active
ENSG00000166165.13	CKB	2.80629	9.5715	7.67826	1.77727738902942e-07	5.15310126126771e-06	6.97394	Healthy-Active
ENSG00000164054.15	SHISA5	-0.685185	6.38305	-7.67611	1.78500529880734e-07	5.17064363858469e-06	7.13797	Healthy-Active
ENSG00000105329.11	TGFB1	-1.5635	5.1512	-7.6742	1.79191980066647e-07	5.18427014504799e-06	7.23276	Healthy-Active
ENSG00000152642.11	GPD1L	1.46242	6.69124	7.67388	1.79307354551155e-07	5.18427014504799e-06	7.10708	Healthy-Active
ENSG00000173068.18	BNC2	-1.94822	2.8215	-7.67327	1.79526202683827e-07	5.18573298305365e-06	7.42374	Healthy-Active
ENSG00000261211.1	AL031123.2	2.00569	1.39327	7.67151	1.80166273068515e-07	5.19934897213922e-06	7.43927	Healthy-Active
ENSG00000106031.9	HOXA13	1.29763	5.73984	7.67017	1.80655909378856e-07	5.20860222915407e-06	7.18511	Healthy-Active
ENSG00000198833.7	UBE2J1	-0.598035	7.50213	-7.66941	1.80935811053366e-07	5.21179685278112e-06	7.05159	Healthy-Active
ENSG00000125354.24	SEPTIN6	-1.52442	4.98495	-7.66795	1.81468499170416e-07	5.22226014279307e-06	7.22819	Healthy-Active
ENSG00000000938.13	FGR	-2.69295	2.71169	-7.66454	1.82725781752842e-07	5.2506268382597e-06	7.39973	Healthy-Active
ENSG00000183496.6	MEX3B	-1.70879	1.49921	-7.66435	1.82794931944215e-07	5.2506268382597e-06	7.42236	Healthy-Active
ENSG00000077150.20	NFKB2	-1.41946	5.5216	-7.66378	1.8300515581447e-07	5.25127616301538e-06	7.17889	Healthy-Active
ENSG00000162522.11	KIAA1522	1.05635	7.94608	7.66337	1.83158297110461e-07	5.25127616301538e-06	7.01251	Healthy-Active
ENSG00000161642.18	ZNF385A	-1.13615	3.39726	-7.66103	1.84025777156216e-07	5.2712439384124e-06	7.35118	Healthy-Active
ENSG00000079432.8	CIC	-0.633341	5.91221	-7.66034	1.84283103536748e-07	5.27371358784225e-06	7.14401	Healthy-Active
ENSG00000129988.6	LBP	-4.99927	-3.70552	-7.65969	1.84527084877434e-07	5.27407321700589e-06	6.15046	Healthy-Active
ENSG00000149557.14	FEZ1	-1.57418	2.15815	-7.65939	1.84637909255033e-07	5.27407321700589e-06	7.41575	Healthy-Active
ENSG00000267480.1	AP001542.3	2.16046	0.680912	7.65687	1.8557999715134e-07	5.29147322402042e-06	7.37249	Healthy-Active
ENSG00000257512.1	AC124947.2	1.96041	0.767426	7.65685	1.85590427149219e-07	5.29147322402042e-06	7.38271	Healthy-Active
ENSG00000120137.7	PANK3	1.20669	7.47692	7.65431	1.86546207668208e-07	5.31380837942867e-06	7.02089	Healthy-Active
ENSG00000184922.14	FMNL1	-1.88648	4.71405	-7.64846	1.88768159945652e-07	5.37213615668046e-06	7.21527	Healthy-Active
ENSG00000140545.15	MFGE8	-1.31034	5.89998	-7.64787	1.8899279164946e-07	5.3735671876642e-06	7.12828	Healthy-Active
ENSG00000198885.10	ITPRIPL1	-1.72107	1.04653	-7.64607	1.89682172470498e-07	5.38819745411357e-06	7.37486	Healthy-Active
ENSG00000198435.4	NRARP	1.58344	7.01062	7.64416	1.90417737494897e-07	5.40411149846245e-06	7.02788	Healthy-Active
ENSG00000029534.21	ANK1	-3.13423	0.174679	-7.64097	1.91651589596491e-07	5.43191062223171e-06	7.27987	Healthy-Active
ENSG00000138193.16	PLCE1	1.39671	6.49574	7.64065	1.91776519022466e-07	5.43191062223171e-06	7.05524	Healthy-Active
ENSG00000211595.2	IGKJ3	-2.27705	0.915817	-7.64027	1.9192598123391e-07	5.43191062223171e-06	7.3485	Healthy-Active
ENSG00000139874.6	SSTR1	2.02224	3.70207	7.63932	1.92292429419148e-07	5.43232113269357e-06	7.2747	Healthy-Active
ENSG00000130414.13	NDUFA10	0.906809	6.9975	7.63932	1.92292993600749e-07	5.43232113269357e-06	7.02121	Healthy-Active
ENSG00000091592.16	NLRP1	-1.64545	4.46103	-7.63418	1.94307879235907e-07	5.48421533510062e-06	7.2106	Healthy-Active
ENSG00000108819.11	PPP1R9B	-0.942505	5.84496	-7.63281	1.94846637745234e-07	5.49438995603464e-06	7.09635	Healthy-Active
ENSG00000010318.21	PHF7	1.32515	3.45797	7.63007	1.95931213330436e-07	5.51992314996104e-06	7.2844	Healthy-Active
ENSG00000164038.16	SLC9B2	-1.78708	1.89407	-7.62935	1.96216669475315e-07	5.52291686748739e-06	7.3605	Healthy-Active
ENSG00000161791.14	FMNL3	-1.55718	4.67561	-7.62869	1.96480876762487e-07	5.5253075754531e-06	7.17887	Healthy-Active
ENSG00000214022.11	REPIN1	0.667723	7.61437	7.62651	1.97353021072524e-07	5.54048206148684e-06	6.96018	Healthy-Active
ENSG00000169554.22	ZEB2	-1.2004	5.68754	-7.62644	1.97380010496498e-07	5.54048206148684e-06	7.09512	Healthy-Active
ENSG00000165566.13	AMER2	-3.8139	-4.44032	-7.62064	1.99713469604289e-07	5.60088157113176e-06	5.94047	Healthy-Active
ENSG00000114853.15	ZBTB47	-1.48265	2.90431	-7.61922	2.00290748596798e-07	5.61196469318356e-06	7.30742	Healthy-Active
ENSG00000171016.13	PYGO1	-1.77194	1.57454	-7.61859	2.00548677287982e-07	5.61408790435323e-06	7.33682	Healthy-Active
ENSG00000224373.3	IGHV4-59	-2.41874	6.98851	-7.61727	2.01082448195529e-07	5.62392208333429e-06	6.98382	Healthy-Active
ENSG00000114850.7	SSR3	-0.662512	7.06406	-7.61664	2.01341745607377e-07	5.62606884983224e-06	6.96831	Healthy-Active
ENSG00000119431.9	HDHD3	1.30093	6.46251	7.61519	2.01932994623116e-07	5.63297002563286e-06	7.001	Healthy-Active
ENSG00000125648.15	SLC25A23	1.31898	6.83982	7.61514	2.01954248023241e-07	5.63297002563286e-06	6.98774	Healthy-Active
ENSG00000153250.20	RBMS1	-1.55794	4.81002	-7.61371	2.02542585860899e-07	5.64427218699708e-06	7.13672	Healthy-Active
ENSG00000158552.13	ZFAND2B	0.757548	5.09377	7.61104	2.03642785612844e-07	5.66545663852304e-06	7.10586	Healthy-Active
ENSG00000158486.13	DNAH3	1.55624	2.24934	7.61097	2.03670418074804e-07	5.66545663852304e-06	7.31657	Healthy-Active
ENSG00000143851.15	PTPN7	-1.92599	3.96125	-7.61035	2.03928672124779e-07	5.66752534135061e-06	7.19877	Healthy-Active
ENSG00000127946.17	HIP1	-1.46436	4.08594	-7.60916	2.04419493427171e-07	5.67604793416111e-06	7.18236	Healthy-Active
ENSG00000170190.16	SLC16A5	1.02481	4.8873	7.60852	2.04685363790572e-07	5.6783146691172e-06	7.11478	Healthy-Active
ENSG00000101473.17	ACOT8	0.995661	4.5574	7.60724	2.0521956971519e-07	5.6880147106042e-06	7.14223	Healthy-Active
ENSG00000243290.3	IGKV1-12	-2.38536	6.56534	-7.60504	2.06138948776507e-07	5.70836346832051e-06	6.98279	Healthy-Active
ENSG00000244005.13	NFS1	0.735374	4.06894	7.60421	2.06485844015783e-07	5.70868739105428e-06	7.1755	Healthy-Active
ENSG00000132688.11	NES	-1.43523	4.60273	-7.604	2.06573258380066e-07	5.70868739105428e-06	7.13191	Healthy-Active
ENSG00000187955.12	COL14A1	-2.16794	5.69795	-7.60364	2.06725217833834e-07	5.70868739105428e-06	7.05611	Healthy-Active
ENSG00000179477.11	ALOX12B	3.06817	-0.407204	7.60324	2.06891529016178e-07	5.70868739105428e-06	7.09079	Healthy-Active
ENSG00000130755.13	GMFG	-1.73096	3.99307	-7.60097	2.07846861034311e-07	5.72991780316504e-06	7.18131	Healthy-Active
ENSG00000175414.7	ARL10	-1.39467	2.55842	-7.60031	2.08127469505194e-07	5.73252612834637e-06	7.28922	Healthy-Active
ENSG00000145332.14	KLHL8	0.834212	5.27926	7.59904	2.08663283063376e-07	5.74215272080027e-06	7.0628	Healthy-Active
ENSG00000107317.13	PTGDS	-4.06602	0.184039	-7.59818	2.09030611527298e-07	5.74712977509622e-06	7.20722	Healthy-Active
ENSG00000163599.17	CTLA4	-3.67406	0.482932	-7.59751	2.09314080374384e-07	5.74979435937512e-06	7.23458	Healthy-Active
ENSG00000140948.13	ZCCHC14	0.617398	5.92269	7.59492	2.10417252280962e-07	5.77206615905296e-06	7.01085	Healthy-Active
ENSG00000128422.17	KRT17	-5.74135	-1.43601	-7.59369	2.10945874543997e-07	5.77206615905296e-06	6.86012	Healthy-Active
ENSG00000164111.15	ANXA5	-1.35198	6.93882	-7.59368	2.10947834544124e-07	5.77206615905296e-06	6.9331	Healthy-Active
ENSG00000196700.9	ZNF512B	-1.53899	3.1137	-7.59361	2.10980921763009e-07	5.77206615905296e-06	7.24124	Healthy-Active
ENSG00000152785.8	BMP3	4.60286	4.76136	7.59342	2.1106124269987e-07	5.77206615905296e-06	7.11047	Healthy-Active
ENSG00000162415.7	ZSWIM5	1.42666	4.11291	7.5924	2.11500674841067e-07	5.77895593907494e-06	7.14181	Healthy-Active
ENSG00000060558.4	GNA15	-2.30499	2.24925	-7.58828	2.13276695651689e-07	5.82208788530702e-06	7.26417	Healthy-Active
ENSG00000203747.12	FCGR3A	-3.04527	3.44881	-7.58787	2.13457036124621e-07	5.82208788530702e-06	7.18095	Healthy-Active
ENSG00000178562.18	CD28	-2.23832	2.22382	-7.58635	2.14116488053342e-07	5.83491094455532e-06	7.26856	Healthy-Active
ENSG00000128656.15	CHN1	-2.54825	2.48595	-7.57862	2.17508842704396e-07	5.92212017755494e-06	7.25148	Healthy-Active
ENSG00000169946.14	ZFPM2	-2.02294	0.73599	-7.57722	2.18129549690984e-07	5.93377833276771e-06	7.22631	Healthy-Active
ENSG00000171219.9	CDC42BPG	1.15092	6.0109	7.57458	2.19301322343308e-07	5.9603933473925e-06	6.95194	Healthy-Active
ENSG00000156411.10	ATP5MPL	0.740522	5.39295	7.57116	2.20833251834711e-07	5.99674154607721e-06	6.99477	Healthy-Active
ENSG00000123143.13	PKN1	-1.15801	5.59657	-7.56861	2.21983832967315e-07	6.0226793273641e-06	6.98182	Healthy-Active
ENSG00000156587.16	UBE2L6	-1.61256	5.05016	-7.56784	2.22329247905931e-07	6.02674560220641e-06	6.99701	Healthy-Active
ENSG00000197562.10	RAB40C	0.797989	5.48151	7.56532	2.23475021085727e-07	6.05117600482647e-06	6.97633	Healthy-Active
ENSG00000026025.16	VIM	-1.63312	6.88668	-7.56499	2.23623161788954e-07	6.05117600482647e-06	6.88806	Healthy-Active
ENSG00000115561.16	CHMP3	0.699894	6.77552	7.56383	2.24152621717337e-07	6.06018241574566e-06	6.882	Healthy-Active
ENSG00000182963.11	GJC1	-2.87672	1.90075	-7.55707	2.27259519904824e-07	6.13879549779719e-06	7.21818	Healthy-Active
ENSG00000100644.17	HIF1A	-1.4859	6.92792	-7.55657	2.27492724145246e-07	6.1397138799305e-06	6.84992	Healthy-Active
ENSG00000146729.10	NIPSNAP2	0.791263	5.87131	7.55296	2.29169889600234e-07	6.17956707556327e-06	6.92059	Healthy-Active
ENSG00000073464.13	CLCN4	-1.67614	1.71896	-7.55226	2.29497523170618e-07	6.18107369485782e-06	7.20882	Healthy-Active
ENSG00000077585.14	GPR137B	-1.20028	3.65121	-7.55198	2.29626857681847e-07	6.18107369485782e-06	7.10748	Healthy-Active
ENSG00000147224.13	PRPS1	-0.9088	4.12522	-7.5508	2.30180995217768e-07	6.18987259959207e-06	7.05929	Healthy-Active
ENSG00000134758.14	RNF138	0.883386	5.41852	7.55043	2.30355402865971e-07	6.18987259959207e-06	6.94953	Healthy-Active
ENSG00000118804.9	STBD1	1.9719	2.24305	7.54728	2.31837893516021e-07	6.22428198262828e-06	7.18945	Healthy-Active
ENSG00000240024.5	LINC00888	-1.47125	1.36801	-7.54439	2.3320771595152e-07	6.25560923702506e-06	7.18728	Healthy-Active
ENSG00000185880.13	TRIM69	-1.24974	2.52649	-7.54317	2.33786494532187e-07	6.26568134606654e-06	7.16147	Healthy-Active
ENSG00000187513.9	GJA4	-3.02174	1.00846	-7.5425	2.34108717914956e-07	6.26886602507113e-06	7.16788	Healthy-Active
ENSG00000196154.12	S100A4	-1.71054	4.967	-7.54169	2.34495891922962e-07	6.27341363799521e-06	6.98105	Healthy-Active
ENSG00000006756.16	ARSD	1.3528	6.11095	7.54097	2.34839058182102e-07	6.27341363799521e-06	6.87066	Healthy-Active
ENSG00000150760.13	DOCK1	0.674035	6.04863	7.54087	2.34889177451947e-07	6.27341363799521e-06	6.88845	Healthy-Active
ENSG00000243989.9	ACY1	1.633	-0.296829	7.537	2.36748017992754e-07	6.31758498922483e-06	7.00884	Healthy-Active
ENSG00000023697.13	DERA	0.832696	5.60587	7.52931	2.40490247964766e-07	6.40133624081795e-06	6.89336	Healthy-Active
ENSG00000110446.12	SLC15A3	-1.36924	4.41217	-7.52931	2.40493548830749e-07	6.40133624081795e-06	6.98701	Healthy-Active
ENSG00000130300.9	PLVAP	-1.46216	6.79507	-7.52927	2.40509631967398e-07	6.40133624081795e-06	6.81124	Healthy-Active
ENSG00000117528.14	ABCD3	1.0564	7.0551	7.52846	2.40910315761453e-07	6.40149701055343e-06	6.78582	Healthy-Active
ENSG00000141959.17	PFKL	0.663119	8.3085	7.52842	2.40931070771292e-07	6.40149701055343e-06	6.71575	Healthy-Active
ENSG00000241839.10	PLEKHO2	-1.7461	4.32224	-7.52673	2.41759722535387e-07	6.41798140246611e-06	6.9939	Healthy-Active
ENSG00000110811.20	P3H3	-1.70855	3.03069	-7.52517	2.42534187806838e-07	6.43300017417777e-06	7.11136	Healthy-Active
ENSG00000162496.9	DHRS3	0.794896	5.90433	7.52388	2.43171657678845e-07	6.44023980641207e-06	6.85952	Healthy-Active
ENSG00000176472.10	ZNF575	1.56549	3.05549	7.52377	2.43225045737116e-07	6.44023980641207e-06	7.09508	Healthy-Active
ENSG00000254042.2	SLIT3-AS2	3.19239	0.680422	7.52271	2.43754901902881e-07	6.44872946914052e-06	7.11703	Healthy-Active
ENSG00000189060.5	H1-0	0.928768	8.38882	7.51824	2.45989643221489e-07	6.50226997746957e-06	6.68684	Healthy-Active
ENSG00000266028.7	SRGAP2	-1.23858	3.72058	-7.51737	2.46423962107735e-07	6.50816875417523e-06	7.03556	Healthy-Active
ENSG00000128791.12	TWSG1	-1.31234	5.45066	-7.51478	2.47730683499975e-07	6.53707825013077e-06	6.88442	Healthy-Active
ENSG00000123472.12	ATPAF1	0.857124	5.82844	7.51237	2.48955937993861e-07	6.56016529094478e-06	6.84664	Healthy-Active
ENSG00000172053.18	QARS1	0.616029	7.67035	7.51222	2.49031290042678e-07	6.56016529094478e-06	6.71676	Healthy-Active
ENSG00000135046.14	ANXA1	-2.35008	5.99065	-7.50865	2.50852631705695e-07	6.60250124833581e-06	6.82179	Healthy-Active
ENSG00000103569.10	AQP9	-7.38893	-1.95323	-7.50803	2.51171161143232e-07	6.60524433241941e-06	6.72779	Healthy-Active
ENSG00000137962.13	ARHGAP29	-1.75307	3.4906	-7.50657	2.51922075314931e-07	6.6124227751401e-06	7.03518	Healthy-Active
ENSG00000105974.13	CAV1	-1.78705	5.38167	-7.5063	2.52060065758837e-07	6.6124227751401e-06	6.87425	Healthy-Active
ENSG00000019102.12	VSIG2	1.39496	6.93717	7.50623	2.5209856764366e-07	6.6124227751401e-06	6.7498	Healthy-Active
ENSG00000211679.2	IGLC3	-2.41375	9.08824	-7.50583	2.52302299846363e-07	6.6124227751401e-06	6.63402	Healthy-Active
ENSG00000137960.6	GIPC2	1.40955	5.43707	7.50488	2.52794165311576e-07	6.61968476556336e-06	6.84991	Healthy-Active
ENSG00000011465.18	DCN	-1.83058	7.69089	-7.49247	2.59290828882967e-07	6.78404298557041e-06	6.68849	Healthy-Active
ENSG00000088340.17	FER1L4	-2.66587	4.32184	-7.4916	2.59754318802527e-07	6.79040530942552e-06	6.9302	Healthy-Active
ENSG00000144810.16	COL8A1	-3.70561	1.99521	-7.48985	2.60686643393948e-07	6.80900257291937e-06	7.08543	Healthy-Active
ENSG00000259087.5	AL121790.2	3.00486	1.4657	7.48803	2.6165603375552e-07	6.82853566162479e-06	7.08157	Healthy-Active
ENSG00000150867.14	PIP4K2A	-1.17682	4.6628	-7.48667	2.62384272749116e-07	6.84174760609178e-06	6.88502	Healthy-Active
ENSG00000166582.10	CENPV	1.21389	4.4116	7.48449	2.63558209876446e-07	6.86654910110053e-06	6.89013	Healthy-Active
ENSG00000081052.13	COL4A4	-1.50974	2.51191	-7.48356	2.64062647180722e-07	6.87388078442317e-06	7.05904	Healthy-Active
ENSG00000065911.13	MTHFD2	-0.859819	4.88722	-7.47972	2.66144864983602e-07	6.92223703262412e-06	6.84137	Healthy-Active
ENSG00000104164.12	BLOC1S6	-0.658731	5.72564	-7.47593	2.68220557980007e-07	6.9639707213073e-06	6.77644	Healthy-Active
ENSG00000197245.6	FAM110D	-1.81501	1.29347	-7.47564	2.68379428781664e-07	6.9639707213073e-06	7.05068	Healthy-Active
ENSG00000158122.12	PRXL2C	-1.38806	2.57072	-7.47555	2.68427280649981e-07	6.9639707213073e-06	7.03526	Healthy-Active
ENSG00000119632.4	IFI27L2	-1.08381	3.44055	-7.47344	2.69590351471152e-07	6.98826259267651e-06	6.967	Healthy-Active
ENSG00000174059.17	CD34	-1.90772	4.3433	-7.47267	2.70014826113089e-07	6.99338399632901e-06	6.88631	Healthy-Active
ENSG00000102401.20	ARMCX3	-0.835837	5.74623	-7.47213	2.70313641751653e-07	6.99524496425498e-06	6.7648	Healthy-Active
ENSG00000160307.10	S100B	-1.9676	1.76508	-7.4712	2.7082754136471e-07	7.00266413792091e-06	7.04875	Healthy-Active
ENSG00000130475.14	FCHO1	-1.64814	2.99977	-7.47045	2.71245850964201e-07	7.00624842353136e-06	7.00305	Healthy-Active
ENSG00000100368.14	CSF2RB	-2.04134	5.23687	-7.47013	2.71420804571443e-07	7.00624842353136e-06	6.79819	Healthy-Active
ENSG00000251322.9	SHANK3	-1.96308	1.97503	-7.4684	2.72387546540464e-07	7.02531930704908e-06	7.04031	Healthy-Active
ENSG00000151067.22	CACNA1C	-2.79038	0.695449	-7.4655	2.74009238978643e-07	7.05082799062659e-06	7.00419	Healthy-Active
ENSG00000223547.10	ZNF844	0.901052	3.32423	7.4654	2.74064061795398e-07	7.05082799062659e-06	6.9616	Healthy-Active
ENSG00000224650.2	IGHV3-74	-2.1681	5.74251	-7.46508	2.74245759858158e-07	7.05082799062659e-06	6.75592	Healthy-Active
ENSG00000176788.9	BASP1	-2.45815	4.37663	-7.465	2.74291644033655e-07	7.05082799062659e-06	6.86517	Healthy-Active
ENSG00000148600.15	CDHR1	3.97625	6.54214	7.46056	2.76798585858925e-07	7.10934101229828e-06	6.68032	Healthy-Active
ENSG00000226777.7	FAM30A	-2.19436	0.946832	-7.45812	2.78186951802138e-07	7.13905082555679e-06	6.99514	Healthy-Active
ENSG00000062485.19	CS	0.80202	7.44657	7.45758	2.78494416818559e-07	7.13915057131802e-06	6.6151	Healthy-Active
ENSG00000173852.15	DPY19L1	-0.960822	5.07231	-7.4573	2.7865410393224e-07	7.13915057131802e-06	6.77939	Healthy-Active
ENSG00000186283.14	TOR3A	-0.842582	5.68568	-7.45592	2.79444801091296e-07	7.15346197212195e-06	6.73446	Healthy-Active
ENSG00000070214.16	SLC44A1	1.10868	8.31788	7.45436	2.80337791289627e-07	7.1703660293258e-06	6.55822	Healthy-Active
ENSG00000007516.14	BAIAP3	1.62489	3.31114	7.4516	2.81928637040313e-07	7.20082712289972e-06	6.94788	Healthy-Active
ENSG00000146112.12	PPP1R18	-2.0304	2.32414	-7.45149	2.8199598771422e-07	7.20082712289972e-06	6.99646	Healthy-Active
ENSG00000232216.1	IGHV3-43	-3.12667	3.55215	-7.44876	2.83576132216355e-07	7.23518209523201e-06	6.91315	Healthy-Active
ENSG00000091527.16	CDV3	-0.765932	7.31172	-7.4478	2.84137128588337e-07	7.24202332177783e-06	6.60029	Healthy-Active
ENSG00000169403.12	PTAFR	-2.08196	4.01643	-7.4474	2.8436823272138e-07	7.24202332177783e-06	6.85563	Healthy-Active
ENSG00000185989.11	RASA3	-1.16435	3.67498	-7.44654	2.84872543384234e-07	7.24202332177783e-06	6.8953	Healthy-Active
ENSG00000040933.16	INPP4A	-0.809688	5.15518	-7.44652	2.84883114145175e-07	7.24202332177783e-06	6.76118	Healthy-Active
ENSG00000054148.18	PHPT1	0.651475	6.13046	7.44629	2.85019119733834e-07	7.24202332177783e-06	6.68541	Healthy-Active
ENSG00000224961.3	LINC01752	1.82083	1.32958	7.44313	2.8687010379212e-07	7.28305063342416e-06	6.98816	Healthy-Active
ENSG00000225335.3	AC016027.1	2.0288	2.14766	7.44236	2.87324826009256e-07	7.28413128293863e-06	6.9811	Healthy-Active
ENSG00000123131.13	PRDX4	-1.22697	5.55692	-7.44226	2.87385342463041e-07	7.28413128293863e-06	6.71776	Healthy-Active
ENSG00000178694.10	NSUN3	0.790154	4.52549	7.44015	2.88632751980013e-07	7.30973709841904e-06	6.79817	Healthy-Active
ENSG00000214135.8	AC132008.2	0.990023	5.21267	7.43899	2.89318953552968e-07	7.31615060177268e-06	6.74125	Healthy-Active
ENSG00000171793.16	CTPS1	-1.17969	3.68719	-7.43892	2.89360747008887e-07	7.31615060177268e-06	6.85902	Healthy-Active
ENSG00000213213.14	CCDC183	1.84785	1.63105	7.43812	2.89836900311142e-07	7.32218287253254e-06	6.98044	Healthy-Active
ENSG00000187098.17	MITF	-1.24257	2.80629	-7.43465	2.91909164934731e-07	7.36849498153428e-06	6.93998	Healthy-Active
ENSG00000105639.20	JAK3	-2.70629	4.19124	-7.43226	2.93343617743375e-07	7.39864455193826e-06	6.80829	Healthy-Active
ENSG00000212907.2	MT-ND4L	1.3452	10.8062	7.43035	2.94501039208284e-07	7.42176331106992e-06	6.39811	Healthy-Active
ENSG00000161940.11	BCL6B	-2.26326	2.34444	-7.42955	2.94985036857914e-07	7.4278871086583e-06	6.95621	Healthy-Active
ENSG00000164237.9	CMBL	1.83344	7.43717	7.42356	2.98633301089747e-07	7.51361385541805e-06	6.54202	Healthy-Active
ENSG00000160796.18	NBEAL2	-0.885842	6.77353	-7.41799	3.02071204278437e-07	7.59391238749241e-06	6.57609	Healthy-Active
ENSG00000167283.8	ATP5MG	0.675134	4.70837	7.41687	3.02766839814094e-07	7.6051970414916e-06	6.72881	Healthy-Active
ENSG00000171105.14	INSR	0.820987	6.86517	7.41608	3.03264263394773e-07	7.61148848704421e-06	6.56806	Healthy-Active
ENSG00000136052.9	SLC41A2	0.833176	5.80035	7.41566	3.03524890870243e-07	7.6118312949648e-06	6.63831	Healthy-Active
ENSG00000198712.1	MT-CO2	1.06305	13.0888	7.41247	3.05522659117138e-07	7.65475648304271e-06	6.28794	Healthy-Active
ENSG00000175707.9	KDF1	1.16423	3.80132	7.41213	3.05733273762226e-07	7.65475648304271e-06	6.79905	Healthy-Active
ENSG00000117122.14	MFAP2	-2.38045	1.79616	-7.40996	3.07104222504204e-07	7.68276481735867e-06	6.92724	Healthy-Active
ENSG00000147036.12	LANCL3	1.65841	2.24362	7.40957	3.07350475967789e-07	7.68276481735867e-06	6.91453	Healthy-Active
ENSG00000088992.18	TESC	-2.59173	0.930215	-7.40741	3.08715402446799e-07	7.71062999903792e-06	6.89883	Healthy-Active
ENSG00000254709.8	IGLL5	-1.91836	2.73173	-7.40549	3.09936921172222e-07	7.73487113153769e-06	6.88995	Healthy-Active
ENSG00000099795.7	NDUFB7	0.766384	5.75079	7.40435	3.10664061804089e-07	7.74379064675077e-06	6.62254	Healthy-Active
ENSG00000115525.18	ST3GAL5	-1.52969	3.34648	-7.40415	3.10796827813202e-07	7.74379064675077e-06	6.8342	Healthy-Active
ENSG00000065600.13	PACC1	-1.13925	2.11206	-7.40307	3.11482662278136e-07	7.75460996290343e-06	6.90763	Healthy-Active
ENSG00000104998.4	IL27RA	-1.56779	2.69189	-7.40229	3.11987427217498e-07	7.76090758213923e-06	6.87822	Healthy-Active
ENSG00000105559.12	PLEKHA4	-1.52544	3.82633	-7.40062	3.13062136005573e-07	7.78136136599013e-06	6.78098	Healthy-Active
ENSG00000150977.11	RILPL2	-1.61484	3.14187	-7.39993	3.13503778085701e-07	7.786059584512e-06	6.84265	Healthy-Active
ENSG00000281333.2	AC024941.2	2.77296	-0.426717	7.396	3.16051624900486e-07	7.83241397971795e-06	6.73263	Healthy-Active
ENSG00000159592.11	GPBP1L1	0.66312	7.47147	7.39593	3.1609730741426e-07	7.83241397971795e-06	6.48525	Healthy-Active
ENSG00000215845.11	TSTD1	1.03208	4.40341	7.39587	3.16132604093609e-07	7.83241397971795e-06	6.71905	Healthy-Active
ENSG00000256643.1	LINC02441	4.43842	1.82147	7.39375	3.1752073312446e-07	7.86048716114778e-06	6.88797	Healthy-Active
ENSG00000105137.13	SYDE1	-1.70299	3.04194	-7.39303	3.17987152440052e-07	7.86571591119971e-06	6.84151	Healthy-Active
ENSG00000025293.17	PHF20	-0.606558	5.12854	-7.39033	3.19759943749077e-07	7.90082599161289e-06	6.64406	Healthy-Active
ENSG00000139835.14	GRTP1	1.4911	4.95205	7.39009	3.19919238101713e-07	7.90082599161289e-06	6.65382	Healthy-Active
ENSG00000115825.11	PRKD3	-0.722339	5.15496	-7.38903	3.20619523926935e-07	7.91178090228347e-06	6.63755	Healthy-Active
ENSG00000130775.16	THEMIS2	-2.02137	4.39679	-7.38765	3.21529610395118e-07	7.92789129759035e-06	6.69911	Healthy-Active
ENSG00000287263.1	AC008875.3	-1.75553	2.43263	-7.38725	3.21799160505575e-07	7.92819498476606e-06	6.864	Healthy-Active
ENSG00000184602.6	SNN	-1.79697	3.76722	-7.38568	3.22838130009522e-07	7.94743930113696e-06	6.75362	Healthy-Active
ENSG00000138029.14	HADHB	0.800317	7.19307	7.38286	3.24717180409152e-07	7.98731701308097e-06	6.4745	Healthy-Active
ENSG00000126267.11	COX6B1	0.781823	6.88899	7.38156	3.255868057351e-07	8.00232132341428e-06	6.49171	Healthy-Active
ENSG00000242534.2	IGKV2D-28	-2.53972	3.80847	-7.38084	3.26074171259031e-07	8.0079139700196e-06	6.74958	Healthy-Active
ENSG00000123352.18	SPATS2	-0.867051	4.96733	-7.37991	3.26698988858075e-07	8.01687064935886e-06	6.63768	Healthy-Active
ENSG00000181061.14	HIGD1A	1.49105	7.22326	7.37878	3.27457405512805e-07	8.02908885863974e-06	6.46295	Healthy-Active
ENSG00000213445.10	SIPA1	-1.39138	5.23186	-7.37505	3.29984318998451e-07	8.07377702536674e-06	6.61086	Healthy-Active
ENSG00000198467.16	TPM2	-1.9063	5.53097	-7.37498	3.30034899413779e-07	8.07377702536674e-06	6.59118	Healthy-Active
ENSG00000187017.17	ESPN	1.99711	5.11627	7.37494	3.30065833424032e-07	8.07377702536674e-06	6.60609	Healthy-Active
ENSG00000272079.2	AC004233.2	1.87847	2.11473	7.37345	3.3107501061026e-07	8.09204036639082e-06	6.84429	Healthy-Active
ENSG00000010030.14	ETV7	-1.8117	2.01897	-7.37263	3.31635056778194e-07	8.09930593103068e-06	6.83461	Healthy-Active
ENSG00000197183.14	NOL4L	0.83802	6.36169	7.37107	3.32709256596644e-07	8.11910688643322e-06	6.51015	Healthy-Active
ENSG00000170004.17	CHD3	-0.763024	7.15349	-7.36949	3.33793004469285e-07	8.13910932812328e-06	6.45219	Healthy-Active
ENSG00000163354.15	DCST2	1.56613	1.42119	7.36757	3.35115246662257e-07	8.164890922828e-06	6.84141	Healthy-Active
ENSG00000133818.14	RRAS2	0.667358	4.89429	7.36632	3.35981699778346e-07	8.17953552043318e-06	6.61242	Healthy-Active
ENSG00000262814.8	MRPL12	0.961543	2.59822	7.36379	3.37735696553957e-07	8.2157473587131e-06	6.8022	Healthy-Active
ENSG00000204054.14	LINC00963	-1.0474	4.17264	-7.36265	3.38537187475745e-07	8.22874972806778e-06	6.66508	Healthy-Active
ENSG00000257845.1	LINC02294	3.21607	-3.99788	7.36148	3.39352630249078e-07	8.24207046249554e-06	5.63326	Healthy-Active
ENSG00000135617.4	PRADC1	0.863413	4.36267	7.36107	3.39636985193022e-07	8.24248151231033e-06	6.6436	Healthy-Active
ENSG00000042062.13	RIPOR3	-1.82687	3.47211	-7.36023	3.40228065875879e-07	8.2460631058197e-06	6.73336	Healthy-Active
ENSG00000072958.9	AP1M1	-0.933666	4.36343	-7.3601	3.40319660965013e-07	8.2460631058197e-06	6.65129	Healthy-Active
ENSG00000228742.11	LINC02577	-5.21402	-2.53205	-7.3596	3.40668983115558e-07	8.24804299183395e-06	6.18457	Healthy-Active
ENSG00000116574.6	RHOU	1.85548	3.00482	7.35774	3.41979712754924e-07	8.27327843549413e-06	6.76606	Healthy-Active
ENSG00000153561.13	RMND5A	1.25063	6.97091	7.35711	3.42427314777782e-07	8.27760962256158e-06	6.4348	Healthy-Active
ENSG00000149091.15	DGKZ	-0.541075	5.99998	-7.35381	3.4476804347956e-07	8.32766133862345e-06	6.49737	Healthy-Active
ENSG00000138399.18	FASTKD1	0.938832	5.55808	7.35198	3.46072855720143e-07	8.35263233057989e-06	6.52993	Healthy-Active
ENSG00000076604.15	TRAF4	0.814125	6.00421	7.35051	3.47121382077818e-07	8.3683626246885e-06	6.49298	Healthy-Active
ENSG00000162618.15	ADGRL4	-2.12253	3.44253	-7.35031	3.47267635604834e-07	8.3683626246885e-06	6.71576	Healthy-Active
ENSG00000123843.13	C4BPB	-3.11721	2.11026	-7.34743	3.49339341393186e-07	8.41170925084328e-06	6.77922	Healthy-Active
ENSG00000118946.12	PCDH17	-3.04543	2.33448	-7.34597	3.50390094119557e-07	8.4304239585159e-06	6.77825	Healthy-Active
ENSG00000135953.11	MFSD9	0.79369	5.37444	7.34453	3.51437834092293e-07	8.44484817501409e-06	6.52488	Healthy-Active
ENSG00000172572.7	PDE3A	1.37	5.99842	7.34423	3.51655686404347e-07	8.44484817501409e-06	6.47801	Healthy-Active
ENSG00000004897.12	CDC27	-0.575235	5.39099	-7.34401	3.51811591340907e-07	8.44484817501409e-06	6.52353	Healthy-Active
ENSG00000211959.2	IGHV4-39	-2.54706	6.82961	-7.34058	3.54317623303341e-07	8.49838402165936e-06	6.40589	Healthy-Active
ENSG00000211952.3	IGHV4-28	-2.52103	1.67096	-7.33989	3.5481807749237e-07	8.50376980279341e-06	6.7862	Healthy-Active
ENSG00000112655.16	PTK7	-1.52409	4.92527	-7.33323	3.59735798894424e-07	8.60931122419584e-06	6.54862	Healthy-Active
ENSG00000165914.15	TTC7B	-1.35218	2.15163	-7.33317	3.59780437259149e-07	8.60931122419584e-06	6.76642	Healthy-Active
ENSG00000243364.8	EFNA4	1.00547	3.60829	7.33275	3.60097556308032e-07	8.61021472689671e-06	6.66518	Healthy-Active
ENSG00000196954.14	CASP4	-1.3839	5.23881	-7.33169	3.60886588675665e-07	8.62121732162743e-06	6.51321	Healthy-Active
ENSG00000114650.20	SCAP	0.833446	6.67868	7.33138	3.61117146173745e-07	8.62121732162743e-06	6.40656	Healthy-Active
ENSG00000187091.14	PLCD1	1.75966	5.63201	7.33075	3.61583746178108e-07	8.62567541869618e-06	6.47792	Healthy-Active
ENSG00000142959.5	BEST4	3.81164	5.6703	7.32867	3.63147674136171e-07	8.65443367873442e-06	6.4532	Healthy-Active
ENSG00000134215.16	VAV3	1.91711	6.79773	7.3284	3.63350870519527e-07	8.65443367873442e-06	6.38489	Healthy-Active
ENSG00000184164.15	CRELD2	-1.16373	5.75545	-7.32774	3.63846062404759e-07	8.65953628523327e-06	6.45297	Healthy-Active
ENSG00000172037.14	LAMB2	-1.48572	5.94929	-7.32482	3.66045081533572e-07	8.70515081631653e-06	6.45237	Healthy-Active
ENSG00000211597.2	IGKJ1	-2.34543	0.15793	-7.32432	3.66424498013071e-07	8.70745524538231e-06	6.66839	Healthy-Active
ENSG00000198909.8	MAP3K3	-1.01349	4.70063	-7.32048	3.69344727270737e-07	8.77008770355269e-06	6.5376	Healthy-Active
ENSG00000165496.5	RPL10L	2.57676	-0.326703	7.3185	3.70864988830826e-07	8.79940709834864e-06	6.60842	Healthy-Active
ENSG00000204291.11	COL15A1	-2.48666	5.36525	-7.31742	3.71691177759495e-07	8.81222599209645e-06	6.47865	Healthy-Active
ENSG00000180353.11	HCLS1	-1.69881	5.63567	-7.31691	3.72085480507622e-07	8.81479369310177e-06	6.45082	Healthy-Active
ENSG00000163644.15	PPM1K	-1.25101	4.4768	-7.31579	3.72946190370021e-07	8.82839825913551e-06	6.55335	Healthy-Active
ENSG00000271447.6	MMP28	1.74986	4.51532	7.31169	3.76129575431944e-07	8.89692221365153e-06	6.55091	Healthy-Active
ENSG00000211966.2	IGHV5-51	-2.88619	6.26046	-7.3111	3.76589111671334e-07	8.90096089786977e-06	6.39482	Healthy-Active
ENSG00000196177.13	ACADSB	1.07529	5.55679	7.30835	3.78738786657876e-07	8.94491045485241e-06	6.43188	Healthy-Active
ENSG00000260173.1	AC020779.2	4.7717	-2.07211	7.3079	3.79088193593267e-07	8.94630720883466e-06	6.18507	Healthy-Active
ENSG00000120885.22	CLU	-2.36001	5.57088	-7.30525	3.8117518737282e-07	8.98867670238538e-06	6.45181	Healthy-Active
ENSG00000147443.13	DOK2	-1.50661	3.4818	-7.30484	3.81499284191488e-07	8.9894414664112e-06	6.60735	Healthy-Active
ENSG00000100258.18	LMF2	-0.583406	6.04801	-7.30327	3.82739700697383e-07	9.01178022551111e-06	6.39188	Healthy-Active
ENSG00000095370.20	SH2D3C	-2.07948	3.19383	-7.3007	3.84785126607101e-07	9.05302472302097e-06	6.6382	Healthy-Active
ENSG00000125730.17	C3	-3.9967	5.68388	-7.29966	3.85615251839238e-07	9.06563514640514e-06	6.40691	Healthy-Active
ENSG00000147799.11	ARHGAP39	1.00319	3.70341	7.29884	3.86269493849773e-07	9.07409456550599e-06	6.58042	Healthy-Active
ENSG00000204257.15	HLA-DMA	-1.39643	4.46823	-7.29695	3.87786516466441e-07	9.10279377304812e-06	6.48523	Healthy-Active
ENSG00000071282.12	LMCD1	-1.61696	3.0282	-7.2964	3.88227421429861e-07	9.10620803340162e-06	6.6415	Healthy-Active
ENSG00000107130.10	NCS1	-2.21037	2.0808	-7.29357	3.90511875162675e-07	9.14790569055424e-06	6.68619	Healthy-Active
ENSG00000169439.12	SDC2	-1.35362	5.0795	-7.29346	3.90598743998228e-07	9.14790569055424e-06	6.45834	Healthy-Active
ENSG00000224822.1	THRB-IT1	3.60654	-1.81575	7.28661	3.96180399771926e-07	9.2715839797802e-06	6.13363	Healthy-Active
ENSG00000211640.4	IGLV6-57	-2.65595	4.52864	-7.28528	3.97277518293592e-07	9.28447350099156e-06	6.48253	Healthy-Active
ENSG00000159842.15	ABR	0.951741	6.73916	7.28521	3.97333653931017e-07	9.28447350099156e-06	6.30078	Healthy-Active
ENSG00000275025.1	AC002401.3	3.81286	-2.26573	7.28393	3.98391338295906e-07	9.30213593758949e-06	6.04993	Healthy-Active
ENSG00000005206.17	SPPL2B	0.706097	6.59784	7.28081	4.0097544491945e-07	9.35538545636819e-06	6.30684	Healthy-Active
ENSG00000012232.9	EXTL3	-0.875724	4.78429	-7.27847	4.02930493305267e-07	9.39388860375313e-06	6.43931	Healthy-Active
ENSG00000120708.17	TGFBI	-1.73175	6.8352	-7.27769	4.03577246384119e-07	9.40185511020781e-06	6.28346	Healthy-Active
ENSG00000107742.13	SPOCK2	-2.27239	4.35375	-7.27706	4.04110633344392e-07	9.40511569133735e-06	6.47304	Healthy-Active
ENSG00000170412.18	GPRC5C	1.29229	5.76633	7.27643	4.04636813939807e-07	9.40511569133735e-06	6.35074	Healthy-Active
ENSG00000143183.18	TMCO1	0.844804	7.23221	7.27638	4.04678284425782e-07	9.40511569133735e-06	6.25236	Healthy-Active
ENSG00000019582.16	CD74	-1.45366	9.95611	-7.27607	4.0493781909752e-07	9.40511569133735e-06	6.0999	Healthy-Active
ENSG00000274576.2	IGHV2-70	-4.07514	3.92751	-7.27511	4.05748154928959e-07	9.41396528561589e-06	6.54516	Healthy-Active
ENSG00000183018.9	SPNS2	-2.37061	4.25116	-7.27489	4.05929718847004e-07	9.41396528561589e-06	6.4595	Healthy-Active
ENSG00000106952.8	TNFSF8	-2.15323	1.75098	-7.27416	4.06547028016107e-07	9.42119244397327e-06	6.65476	Healthy-Active
ENSG00000151468.11	CCDC3	-3.36061	1.82775	-7.27266	4.07813245344244e-07	9.44343503738163e-06	6.65054	Healthy-Active
ENSG00000197646.8	PDCD1LG2	-1.98746	1.07351	-7.27149	4.08809181023046e-07	9.44542461104958e-06	6.64631	Healthy-Active
ENSG00000150961.15	SEC24D	-0.908319	6.05457	-7.27146	4.08830850647659e-07	9.44542461104958e-06	6.31539	Healthy-Active
ENSG00000088826.18	SMOX	-2.4502	2.73101	-7.27111	4.09128223059282e-07	9.44542461104958e-06	6.60298	Healthy-Active
ENSG00000197380.11	DACT3	-1.64025	2.12562	-7.27089	4.09312669750394e-07	9.44542461104958e-06	6.64299	Healthy-Active
ENSG00000119729.12	RHOQ	-1.09901	5.08376	-7.27057	4.09588124777346e-07	9.44542461104958e-06	6.40056	Healthy-Active
ENSG00000165516.11	KLHDC2	0.738783	5.60297	7.27039	4.09737928846348e-07	9.44542461104958e-06	6.35745	Healthy-Active
ENSG00000148187.18	MRRF	0.720367	5.18876	7.26981	4.10236189040197e-07	9.44644245994549e-06	6.3844	Healthy-Active
ENSG00000173198.6	CYSLTR1	-1.32174	2.66134	-7.26962	4.10395070045327e-07	9.44644245994549e-06	6.61125	Healthy-Active
ENSG00000185862.7	EVI2B	-1.72125	4.6591	-7.26742	4.12273524819954e-07	9.48208249877772e-06	6.42976	Healthy-Active
ENSG00000154265.16	ABCA5	1.16761	6.48505	7.26709	4.12558730439017e-07	9.48208249877772e-06	6.28315	Healthy-Active
ENSG00000110719.10	TCIRG1	-0.852208	6.85355	-7.26587	4.13606039254161e-07	9.48562825744948e-06	6.25071	Healthy-Active
ENSG00000136193.17	SCRN1	-1.02376	4.62647	-7.26558	4.13850554518516e-07	9.48562825744948e-06	6.43316	Healthy-Active
ENSG00000114315.4	HES1	1.39113	6.27645	7.2655	4.13918083418774e-07	9.48562825744948e-06	6.2943	Healthy-Active
ENSG00000125910.6	S1PR4	-2.76897	1.53604	-7.26547	4.13944064315549e-07	9.48562825744948e-06	6.63893	Healthy-Active
ENSG00000286158.1	AL034548.2	1.81441	1.17226	7.265	4.1434895848543e-07	9.48785233988071e-06	6.63162	Healthy-Active
ENSG00000106078.19	COBL	1.44981	5.8128	7.26445	4.14821959700872e-07	9.49163149216078e-06	6.32366	Healthy-Active
ENSG00000169508.7	GPR183	-1.81977	3.2992	-7.26393	4.15269999063435e-07	9.49483430351197e-06	6.5517	Healthy-Active
ENSG00000196743.9	GM2A	-0.855043	5.78952	-7.26261	4.16413354313702e-07	9.51391845315241e-06	6.32326	Healthy-Active
ENSG00000137714.3	FDX1	0.858924	5.20706	7.25814	4.20295092135712e-07	9.59549261830724e-06	6.35849	Healthy-Active
ENSG00000101213.7	PTK6	1.21824	6.82039	7.25758	4.20785851931914e-07	9.59958604174206e-06	6.23455	Healthy-Active
ENSG00000105270.15	CLIP3	-1.42969	2.98468	-7.25663	4.21611810057246e-07	9.60907291400964e-06	6.56998	Healthy-Active
ENSG00000169715.15	MT1E	2.67876	6.0565	7.25639	4.21825237748776e-07	9.60907291400964e-06	6.29574	Healthy-Active
ENSG00000164867.11	NOS3	-2.05844	2.25184	-7.25233	4.25396693019588e-07	9.68231741915785e-06	6.59605	Healthy-Active
ENSG00000172818.10	OVOL1	1.49967	4.15817	7.25202	4.25668865479994e-07	9.68231741915785e-06	6.42935	Healthy-Active
ENSG00000126709.16	IFI6	-2.11691	4.33941	-7.25018	4.27306602936412e-07	9.71240177662475e-06	6.39952	Healthy-Active
ENSG00000073792.16	IGF2BP2	0.959447	5.65876	7.24932	4.28067720780462e-07	9.72253148281107e-06	6.30556	Healthy-Active
ENSG00000116459.11	ATP5PB	0.886256	7.7752	7.24524	4.31709553647638e-07	9.79802662221933e-06	6.14732	Healthy-Active
ENSG00000164086.10	DUSP7	-1.23942	3.8674	-7.24264	4.34055987168761e-07	9.84403206808563e-06	6.4471	Healthy-Active
ENSG00000137171.15	KLC4	1.14194	6.42533	7.23697	4.39202026159436e-07	9.95341591783822e-06	6.22082	Healthy-Active
ENSG00000178462.12	TUBAL3	2.39795	4.01361	7.23652	4.39609229127097e-07	9.95532406386939e-06	6.41276	Healthy-Active
ENSG00000197872.11	CYRIA	-1.73556	3.05069	-7.23615	4.39946030122843e-07	9.95563626609115e-06	6.50992	Healthy-Active
ENSG00000059573.9	ALDH18A1	1.01435	7.45458	7.23485	4.41144941791439e-07	9.97544259057515e-06	6.1515	Healthy-Active
ENSG00000124508.17	BTN2A2	-1.24716	3.85407	-7.23131	4.44404374168325e-07	1.00354149950485e-05	6.42433	Healthy-Active
ENSG00000125850.11	OVOL2	1.55538	3.60987	7.23126	4.44448313430494e-07	1.00354149950485e-05	6.44396	Healthy-Active
ENSG00000136732.16	GYPC	-1.73619	3.61111	-7.23041	4.45231370145102e-07	1.00457365001773e-05	6.45596	Healthy-Active
ENSG00000130309.11	COLGALT1	-0.628813	6.44123	-7.22975	4.45849354917945e-07	1.00467106764464e-05	6.20962	Healthy-Active
ENSG00000158485.11	CD1B	-4.90201	-3.1731	-7.22942	4.46153420793463e-07	1.00467106764464e-05	5.68262	Healthy-Active
ENSG00000174007.9	CEP19	-2.18087	0.786733	-7.22931	4.46252455016225e-07	1.00467106764464e-05	6.54887	Healthy-Active
ENSG00000135604.10	STX11	-2.18149	2.12949	-7.22781	4.47646398477197e-07	1.00707369689531e-05	6.54886	Healthy-Active
ENSG00000166250.12	CLMP	-1.85255	4.1677	-7.22579	4.49538677361167e-07	1.01059311268771e-05	6.40171	Healthy-Active
ENSG00000162729.14	IGSF8	0.600409	5.92733	7.22362	4.51571393768864e-07	1.0144228810022e-05	6.23444	Healthy-Active
ENSG00000158480.11	SPATA2	0.811189	4.76502	7.22299	4.52160454215466e-07	1.01448135480692e-05	6.32355	Healthy-Active
ENSG00000071246.11	VASH1	-1.42809	4.0674	-7.22289	4.52255728725448e-07	1.01448135480692e-05	6.391	Healthy-Active
ENSG00000130813.18	SHFL	-0.774365	3.74035	-7.22075	4.54274162790712e-07	1.01826792519073e-05	6.41316	Healthy-Active
ENSG00000166562.9	SEC11C	-0.919226	5.83839	-7.21662	4.58197054769881e-07	1.02631478379815e-05	6.21992	Healthy-Active
ENSG00000168936.11	TMEM129	0.648265	5.86493	7.21365	4.6103893685227e-07	1.03193036112736e-05	6.21771	Healthy-Active
ENSG00000143401.15	ANP32E	-0.834201	5.46015	-7.21191	4.62718264980179e-07	1.03493756494587e-05	6.23913	Healthy-Active
ENSG00000111725.11	PRKAB1	0.785782	5.91682	7.21103	4.63562991060738e-07	1.0360750505789e-05	6.20432	Healthy-Active
ENSG00000197457.10	STMN3	-1.60702	3.14514	-7.2087	4.65825093685374e-07	1.04037646467224e-05	6.44613	Healthy-Active
ENSG00000251292.1	ERVH-1	4.89716	-1.47408	7.20734	4.67143432517567e-07	1.04197946925842e-05	6.20578	Healthy-Active
ENSG00000232354.8	VIPR1-AS1	2.45666	2.66791	7.20726	4.67218982679063e-07	1.04197946925842e-05	6.48003	Healthy-Active
ENSG00000257185.2	LINC02293	3.50853	-0.51531	7.20643	4.68030381682745e-07	1.04303430179638e-05	6.29744	Healthy-Active
ENSG00000151135.10	TMEM263	-0.844326	5.4471	-7.20599	4.68459149592096e-07	1.04323550936257e-05	6.22846	Healthy-Active
ENSG00000166886.13	NAB2	-1.55253	3.42179	-7.20479	4.69633390851743e-07	1.04509536024849e-05	6.42345	Healthy-Active
ENSG00000171115.4	GIMAP8	-1.45169	3.96422	-7.20314	4.71250987465818e-07	1.04793843323838e-05	6.35091	Healthy-Active
ENSG00000123684.13	LPGAT1	-0.846288	5.89459	-7.20116	4.73198690247939e-07	1.05151094680113e-05	6.17925	Healthy-Active
ENSG00000185101.13	ANO9	1.03374	7.06011	7.19893	4.7540907239374e-07	1.05566160088238e-05	6.09901	Healthy-Active
ENSG00000145703.16	IQGAP2	0.854503	6.99972	7.19752	4.76805600448432e-07	1.05800038959115e-05	6.09662	Healthy-Active
ENSG00000125144.14	MT1G	3.8576	5.80004	7.19703	4.7729526549304e-07	1.05832499120583e-05	6.19203	Healthy-Active
ENSG00000137571.11	SLCO5A1	-1.50052	1.14957	-7.19664	4.77684549927531e-07	1.05842670836207e-05	6.49738	Healthy-Active
ENSG00000143641.10	GALNT2	-0.951313	6.27521	-7.1931	4.81217435273149e-07	1.06548869055702e-05	6.13337	Healthy-Active
ENSG00000152465.18	NMT2	0.815825	4.6172	7.19127	4.83065141215128e-07	1.06881196822624e-05	6.27705	Healthy-Active
ENSG00000111801.16	BTN3A3	-1.10441	5.18762	-7.18798	4.86390823825422e-07	1.07539824828718e-05	6.20764	Healthy-Active
ENSG00000130055.14	GDPD2	1.54874	3.27323	7.18607	4.88334087640904e-07	1.07826797807309e-05	6.39577	Healthy-Active
ENSG00000139278.10	GLIPR1	-1.49982	3.94672	-7.18601	4.8838846805426e-07	1.07826797807309e-05	6.33664	Healthy-Active
ENSG00000100077.15	GRK3	-1.46578	3.53064	-7.18491	4.89517698981218e-07	1.07998747317825e-05	6.36351	Healthy-Active
ENSG00000152784.16	PRDM8	-1.70806	1.72328	-7.18425	4.90190918668855e-07	1.0806991633972e-05	6.47557	Healthy-Active
ENSG00000126777.18	KTN1	0.635264	8.67633	7.18316	4.91299738025792e-07	1.08236949433116e-05	5.96713	Healthy-Active
ENSG00000176142.13	TMEM39A	-0.677918	5.13468	-7.18229	4.92198848202748e-07	1.08357576431835e-05	6.20513	Healthy-Active
ENSG00000116663.11	FBXO6	-1.32067	2.90226	-7.17928	4.9529563792641e-07	1.08926966262922e-05	6.38927	Healthy-Active
ENSG00000116852.15	KIF21B	-1.12563	4.235	-7.17905	4.9553789646802e-07	1.08926966262922e-05	6.2756	Healthy-Active
ENSG00000257842.6	LINC02588	3.59096	-1.37991	7.17875	4.95845474406669e-07	1.08926966262922e-05	6.09263	Healthy-Active
ENSG00000134874.18	DZIP1	-1.45808	2.98463	-7.17693	4.97739161344927e-07	1.09265090397521e-05	6.40818	Healthy-Active
ENSG00000180828.3	BHLHE22	-3.42411	0.223826	-7.17608	4.98622248919769e-07	1.0938104152282e-05	6.39259	Healthy-Active
ENSG00000149311.19	ATM	-1.07996	6.05897	-7.17502	4.99724182483516e-07	1.09544801054939e-05	6.12275	Healthy-Active
ENSG00000176971.4	FIBIN	-3.64042	1.41516	-7.17396	5.00829098280672e-07	1.09589184270217e-05	6.45409	Healthy-Active
ENSG00000143158.11	MPC2	1.03168	5.58357	7.17388	5.0091748952866e-07	1.09589184270217e-05	6.14948	Healthy-Active
ENSG00000106571.15	GLI3	-1.95978	2.20605	-7.17381	5.00993350756741e-07	1.09589184270217e-05	6.44425	Healthy-Active
ENSG00000164221.13	CCDC112	0.783016	4.5059	7.17311	5.01722599452234e-07	1.09670866934165e-05	6.24138	Healthy-Active
ENSG00000185201.17	IFITM2	-2.29315	4.63703	-7.17114	5.03793861733301e-07	1.1004557485813e-05	6.2179	Healthy-Active
ENSG00000134516.18	DOCK2	-1.47743	4.88814	-7.17035	5.04619616168487e-07	1.10147883781366e-05	6.20628	Healthy-Active
ENSG00000101076.17	HNF4A	1.52334	7.98326	7.16831	5.06779597615318e-07	1.1054107557043e-05	5.97067	Healthy-Active
ENSG00000242110.8	AMACR	1.71671	2.90157	7.16786	5.07253002532212e-07	1.10566087631155e-05	6.38509	Healthy-Active
ENSG00000135124.15	P2RX4	1.09889	6.29833	7.16575	5.09489251506043e-07	1.10975040428747e-05	6.0807	Healthy-Active
ENSG00000118492.18	ADGB	2.51412	-0.719083	7.16329	5.12120368476967e-07	1.11469363536925e-05	6.27355	Healthy-Active
ENSG00000161533.12	ACOX1	1.38366	7.23342	7.16135	5.14202542431054e-07	1.11843588992714e-05	6.00354	Healthy-Active
ENSG00000168899.5	VAMP5	-1.48612	3.57711	-7.15864	5.17120948932299e-07	1.12399046312006e-05	6.29844	Healthy-Active
ENSG00000185479.6	KRT6B	-5.79772	-3.17996	-7.15828	5.17511293103446e-07	1.12404619906563e-05	5.58681	Healthy-Active
ENSG00000165629.20	ATP5F1C	0.878167	7.59216	7.15629	5.1966338527494e-07	1.12792571813795e-05	5.96869	Healthy-Active
ENSG00000100003.18	SEC14L2	-1.90767	1.50051	-7.15422	5.21917739961195e-07	1.13202158081239e-05	6.4155	Healthy-Active
ENSG00000224051.7	CPTP	0.816291	5.70276	7.15093	5.25530385899978e-07	1.13905569787786e-05	6.09638	Healthy-Active
ENSG00000128602.11	SMO	-1.26234	3.18721	-7.14983	5.26732066413262e-07	1.14036659114102e-05	6.32391	Healthy-Active
ENSG00000196352.16	CD55	-2.94627	6.01023	-7.1497	5.26875190871424e-07	1.14036659114102e-05	6.05246	Healthy-Active
ENSG00000036672.16	USP2	1.69782	3.82584	7.14728	5.29557235870262e-07	1.14536726784262e-05	6.23144	Healthy-Active
ENSG00000206073.11	SERPINB4	-4.91171	-4.53433	-7.14596	5.31016507128304e-07	1.14669575323336e-05	5.24236	Healthy-Active
ENSG00000095209.12	TMEM38B	1.19381	4.27548	7.14542	5.31611832376229e-07	1.14669575323336e-05	6.2063	Healthy-Active
ENSG00000133574.10	GIMAP4	-1.55825	4.62336	-7.14542	5.31612434082028e-07	1.14669575323336e-05	6.16957	Healthy-Active
ENSG00000093072.18	ADA2	-1.59524	5.85255	-7.14512	5.31956262052924e-07	1.14669575323336e-05	6.07081	Healthy-Active
ENSG00000271601.4	LIX1L	-1.20656	3.74705	-7.14505	5.32031707966552e-07	1.14669575323336e-05	6.27018	Healthy-Active
ENSG00000104312.8	RIPK2	-1.39462	3.2253	-7.14426	5.32910673303562e-07	1.1477875514947e-05	6.30245	Healthy-Active
ENSG00000090971.5	NAT14	-1.48866	1.88052	-7.14284	5.34499277035521e-07	1.15040518278714e-05	6.3872	Healthy-Active
ENSG00000203943.9	SAMD13	1.84118	3.10921	7.14166	5.35812838507122e-07	1.15242759913664e-05	6.30498	Healthy-Active
ENSG00000164405.11	UQCRQ	0.734271	5.40617	7.13994	5.37743450109966e-07	1.15577342230399e-05	6.09225	Healthy-Active
ENSG00000115604.12	IL18R1	-1.59562	2.72849	-7.13927	5.38506176099696e-07	1.15660619188632e-05	6.33189	Healthy-Active
ENSG00000145088.9	EAF2	-1.32578	3.41872	-7.13389	5.44604127822569e-07	1.16853291712466e-05	6.26877	Healthy-Active
ENSG00000222041.11	CYTOR	-1.84008	1.63199	-7.1337	5.44817430293676e-07	1.16853291712466e-05	6.37275	Healthy-Active
ENSG00000144045.14	DQX1	1.26207	4.92168	7.13199	5.46769359285599e-07	1.1719039236816e-05	6.1248	Healthy-Active
ENSG00000249453.1	AC092834.1	3.69277	1.19417	7.12941	5.49733745590865e-07	1.17662125375943e-05	6.36247	Healthy-Active
ENSG00000186918.14	ZNF395	0.706339	5.61729	7.12941	5.49733819607925e-07	1.17662125375943e-05	6.05687	Healthy-Active
ENSG00000077463.15	SIRT6	1.00521	6.08886	7.12861	5.50658722557329e-07	1.17778296238303e-05	6.01518	Healthy-Active
ENSG00000148541.13	FAM13C	-2.04852	1.06793	-7.12714	5.52349206675866e-07	1.18057939659895e-05	6.35353	Healthy-Active
ENSG00000011347.10	SYT7	1.27715	4.6089	7.12582	5.53887303205863e-07	1.18304647069355e-05	6.13696	Healthy-Active
ENSG00000140740.11	UQCRC2	0.993927	8.10976	7.12343	5.56668130172186e-07	1.18816263435159e-05	5.86813	Healthy-Active
ENSG00000131174.7	COX7B	0.883593	6.10943	7.12289	5.57297133844846e-07	1.18868200430671e-05	5.9989	Healthy-Active
ENSG00000139209.16	SLC38A4	4.61588	2.16263	7.12176	5.58611008621359e-07	1.19066043545774e-05	6.33809	Healthy-Active
ENSG00000187601.5	MAGEH1	-1.34095	3.36275	-7.12115	5.59323670419688e-07	1.19135555259193e-05	6.2523	Healthy-Active
ENSG00000182621.18	PLCB1	-1.61704	2.64767	-7.11931	5.61494378678448e-07	1.19515319373263e-05	6.29717	Healthy-Active
ENSG00000118257.17	NRP2	-1.61437	3.55979	-7.11813	5.62882258728499e-07	1.19728047593313e-05	6.22847	Healthy-Active
ENSG00000005001.10	PRSS22	-3.51576	0.573287	-7.11778	5.63290140617124e-07	1.19732175337658e-05	6.32886	Healthy-Active
ENSG00000149260.18	CAPN5	1.11294	8.11211	7.11691	5.64320385330898e-07	1.19781902711787e-05	5.85353	Healthy-Active
ENSG00000167191.12	GPRC5B	-1.57061	3.04668	-7.11669	5.64583540611077e-07	1.19781902711787e-05	6.26111	Healthy-Active
ENSG00000173482.17	PTPRM	-1.50548	4.68111	-7.11633	5.65003224252152e-07	1.19781902711787e-05	6.11557	Healthy-Active
ENSG00000119185.13	ITGB1BP1	-0.738976	4.60723	-7.11627	5.6507863645871e-07	1.19781902711787e-05	6.11152	Healthy-Active
ENSG00000176058.13	TPRN	1.41452	6.52608	7.11444	5.67246600856838e-07	1.20158814329956e-05	5.95011	Healthy-Active
ENSG00000006611.17	USH1C	1.02073	7.08179	7.11332	5.68586318063486e-07	1.20359882616997e-05	5.91185	Healthy-Active
ENSG00000124568.12	SLC17A1	3.5654	-1.97234	7.11236	5.69728348529341e-07	1.20518856760623e-05	5.87278	Healthy-Active
ENSG00000106348.18	IMPDH1	-1.04693	4.9699	-7.11115	5.71171195718814e-07	1.20741203177295e-05	6.07326	Healthy-Active
ENSG00000180425.11	C11orf71	1.00332	2.84999	7.11012	5.7240831089954e-07	1.20886416860924e-05	6.26663	Healthy-Active
ENSG00000211943.2	IGHV3-15	-2.62167	6.4453	-7.10993	5.72642576869503e-07	1.20886416860924e-05	5.95669	Healthy-Active
ENSG00000134802.18	SLC43A3	-1.59496	2.20219	-7.10831	5.7458475664135e-07	1.21213393459569e-05	6.30586	Healthy-Active
ENSG00000117054.15	ACADM	0.998927	6.56763	7.10751	5.75556161229148e-07	1.21335269803308e-05	5.93516	Healthy-Active
ENSG00000112115.7	IL17A	-5.34755	-3.06582	-7.10588	5.77518698038843e-07	1.21665781218422e-05	5.60405	Healthy-Active
ENSG00000112874.10	NUDT12	1.06867	5.13581	7.10531	5.78216636435172e-07	1.21729610324921e-05	6.03778	Healthy-Active
ENSG00000131238.18	PPT1	-0.916098	5.90983	-7.10426	5.79486892924903e-07	1.21913757862378e-05	5.98098	Healthy-Active
ENSG00000134398.15	ERN2	1.1034	7.23742	7.10303	5.80984039771715e-07	1.22145355319264e-05	5.87927	Healthy-Active
ENSG00000130303.14	BST2	-1.61485	5.39999	-7.10189	5.82372494956034e-07	1.22353801411315e-05	6.01061	Healthy-Active
ENSG00000128394.17	APOBEC3F	-1.13893	2.48828	-7.10015	5.84508897898865e-07	1.22686368264636e-05	6.27202	Healthy-Active
ENSG00000211945.2	IGHV1-18	-2.66725	6.41082	-7.09995	5.84751549205901e-07	1.22686368264636e-05	5.93178	Healthy-Active
ENSG00000259345.7	AC013652.1	2.42689	-0.680089	7.09915	5.85733679325491e-07	1.22806949346583e-05	6.13351	Healthy-Active
ENSG00000173546.7	CSPG4	-1.85812	2.89242	-7.09883	5.86123170853714e-07	1.22806949346583e-05	6.25525	Healthy-Active
ENSG00000214888.3	AL772337.1	4.87884	-1.38396	7.0963	5.89251675926845e-07	1.23378572715634e-05	5.9326	Healthy-Active
ENSG00000135480.16	KRT7	-4.27105	-0.380544	-7.09542	5.90337176984791e-07	1.23506861188918e-05	6.18065	Healthy-Active
ENSG00000065361.16	ERBB3	1.58692	8.1579	7.09516	5.90665823277845e-07	1.23506861188918e-05	5.80552	Healthy-Active
ENSG00000163191.6	S100A11	-1.45467	5.83475	-7.09352	5.92692609730882e-07	1.23846636776376e-05	5.95269	Healthy-Active
ENSG00000088756.13	ARHGAP28	-1.70041	2.55655	-7.09234	5.94163419588204e-07	1.24069856064553e-05	6.25695	Healthy-Active
ENSG00000163629.13	PTPN13	-1.60201	3.19471	-7.09099	5.9585742248158e-07	1.24271543193095e-05	6.18552	Healthy-Active
ENSG00000197142.10	ACSL5	1.0463	7.81485	7.09092	5.95935695919647e-07	1.24271543193095e-05	5.81349	Healthy-Active
ENSG00000132305.21	IMMT	0.740374	6.63059	7.0901	5.9696313023831e-07	1.24317092955314e-05	5.8936	Healthy-Active
ENSG00000253522.6	MIR3142HG	-2.495	1.57837	-7.08984	5.97292961763273e-07	1.24317092955314e-05	6.27262	Healthy-Active
ENSG00000164949.8	GEM	-2.13226	3.21044	-7.08978	5.97364182430224e-07	1.24317092955314e-05	6.1998	Healthy-Active
ENSG00000076356.7	PLXNA2	1.0479	6.53482	7.08886	5.98520318711831e-07	1.24473648738309e-05	5.90096	Healthy-Active
ENSG00000164970.15	FAM219A	-0.924167	3.9669	-7.08853	5.98938336740862e-07	1.24476591211666e-05	6.11611	Healthy-Active
ENSG00000160113.6	NR2F6	1.04643	6.66333	7.08663	6.0133373859907e-07	1.24890209955269e-05	5.88409	Healthy-Active
ENSG00000164251.5	F2RL1	1.33047	7.10498	7.0825	6.06566328128882e-07	1.25806464603418e-05	5.83845	Healthy-Active
ENSG00000121064.13	SCPEP1	-0.886689	5.14562	-7.08245	6.06637013473224e-07	1.25806464603418e-05	6.00186	Healthy-Active
ENSG00000167081.18	PBX3	-1.18237	3.45378	-7.08219	6.06969964846313e-07	1.25806464603418e-05	6.16365	Healthy-Active
ENSG00000115295.20	CLIP4	-1.57307	3.01186	-7.08	6.09770351709261e-07	1.26301962433005e-05	6.19699	Healthy-Active
ENSG00000132182.12	NUP210	-1.21523	5.23896	-7.07734	6.13177982449462e-07	1.2685649026525e-05	5.97578	Healthy-Active
ENSG00000181026.15	AEN	-1.20417	3.76731	-7.077	6.13625559955962e-07	1.2685649026525e-05	6.10864	Healthy-Active
ENSG00000237989.1	LINC01679	-3.95569	-1.03921	-7.07695	6.13682317204139e-07	1.2685649026525e-05	5.99223	Healthy-Active
ENSG00000159840.16	ZYX	-1.28354	5.3164	-7.07341	6.18265710068942e-07	1.27718280496212e-05	5.9629	Healthy-Active
ENSG00000178719.17	GRINA	-1.30358	5.61594	-7.07235	6.19646985106398e-07	1.27917881634054e-05	5.92438	Healthy-Active
ENSG00000287401.1	AC034139.1	2.11404	-0.39717	7.07088	6.21569944312924e-07	1.28169666515207e-05	6.10524	Healthy-Active
ENSG00000213619.11	NDUFS3	0.850243	5.82733	7.07049	6.22072662252274e-07	1.28169666515207e-05	5.91069	Healthy-Active
ENSG00000138496.16	PARP9	-1.21451	5.66601	-7.07046	6.22114211436196e-07	1.28169666515207e-05	5.90652	Healthy-Active
ENSG00000162949.16	CAPN13	3.80705	4.49778	7.06923	6.23730140153453e-07	1.28416744486771e-05	6.02704	Healthy-Active
ENSG00000129675.16	ARHGEF6	-1.35584	4.69673	-7.06764	6.25815974191479e-07	1.28760174503041e-05	6.00604	Healthy-Active
ENSG00000130545.16	CRB3	1.04053	4.802	7.06694	6.26731244700534e-07	1.2886246626361e-05	5.98174	Healthy-Active
ENSG00000107864.15	CPEB3	0.989874	3.6754	7.06563	6.28468204787134e-07	1.29133456931628e-05	6.09637	Healthy-Active
ENSG00000053770.12	AP5M1	0.685671	6.37856	7.06483	6.29523212799117e-07	1.29264056906606e-05	5.85808	Healthy-Active
ENSG00000110274.16	CEP164	-0.670093	4.59614	-7.06319	6.31698892172889e-07	1.29624444445144e-05	6.00393	Healthy-Active
ENSG00000165449.12	SLC16A9	2.49691	5.42221	7.06212	6.33121205205172e-07	1.29829864708108e-05	5.952	Healthy-Active
ENSG00000184867.14	ARMCX2	-1.49654	3.02015	-7.05997	6.35983378496535e-07	1.30330077850011e-05	6.15206	Healthy-Active
ENSG00000145779.8	TNFAIP8	-1.47151	4.81818	-7.05674	6.4032873326032e-07	1.31060066427601e-05	5.9687	Healthy-Active
ENSG00000010295.20	IFFO1	-1.40009	4.02019	-7.05669	6.40396028811416e-07	1.31060066427601e-05	6.04687	Healthy-Active
ENSG00000101856.10	PGRMC1	0.750955	7.10277	7.05567	6.4176320581552e-07	1.31252712451494e-05	5.78945	Healthy-Active
ENSG00000198888.2	MT-ND1	1.33972	12.814	7.05467	6.43123360350769e-07	1.3142118378671e-05	5.5326	Healthy-Active
ENSG00000188015.10	S100A3	-4.05906	-1.69632	-7.05443	6.43439753201213e-07	1.3142118378671e-05	5.82798	Healthy-Active
ENSG00000143061.18	IGSF3	1.30224	5.57425	7.05322	6.4508801386034e-07	1.31670580630394e-05	5.8929	Healthy-Active
ENSG00000107796.13	ACTA2	-1.94418	5.38742	-7.05266	6.45846072451968e-07	1.31685977130861e-05	5.92485	Healthy-Active
ENSG00000166289.6	PLEKHF1	-1.52803	2.47464	-7.05214	6.46548303063834e-07	1.31685977130861e-05	6.16898	Healthy-Active
ENSG00000241388.5	HNF1A-AS1	2.34931	5.2075	7.05213	6.46561706450363e-07	1.31685977130861e-05	5.92143	Healthy-Active
ENSG00000143013.13	LMO4	-1.08195	5.53319	-7.05191	6.46872487512163e-07	1.31685977130861e-05	5.90256	Healthy-Active
ENSG00000184349.14	EFNA5	1.24579	2.78176	7.05105	6.48043344831608e-07	1.3183725367033e-05	6.14725	Healthy-Active
ENSG00000128335.14	APOL2	-1.25965	5.45247	-7.05027	6.49107430941231e-07	1.31923181126643e-05	5.88582	Healthy-Active
ENSG00000160710.18	ADAR	-0.550812	7.75976	-7.05011	6.49321779855025e-07	1.31923181126643e-05	5.73263	Healthy-Active
ENSG00000164175.15	SLC45A2	4.6298	-2.57301	7.04811	6.5205945252801e-07	1.3239212375735e-05	5.40147	Healthy-Active
ENSG00000187699.10	C2orf88	1.98934	6.50145	7.04519	6.56084907530009e-07	1.33121744140766e-05	5.80534	Healthy-Active
ENSG00000078401.7	EDN1	1.35122	4.12464	7.04248	6.59837104581052e-07	1.33794996054557e-05	6.00517	Healthy-Active
ENSG00000162889.11	MAPKAPK2	-0.873925	6.77231	-7.04144	6.61279761059675e-07	1.33817020647694e-05	5.78518	Healthy-Active
ENSG00000069424.15	KCNAB2	-1.46841	4.24985	-7.04143	6.61303629646441e-07	1.33817020647694e-05	5.99205	Healthy-Active
ENSG00000137038.8	DMAC1	0.742844	5.12004	7.04108	6.6178204593118e-07	1.33817020647694e-05	5.90283	Healthy-Active
ENSG00000144852.20	NR1I2	1.6543	5.60782	7.04095	6.61965222462557e-07	1.33817020647694e-05	5.85919	Healthy-Active
ENSG00000157111.13	TMEM171	2.03606	5.58859	7.04084	6.62116597409989e-07	1.33817020647694e-05	5.86439	Healthy-Active
ENSG00000211892.4	IGHG4	-5.4787	4.22413	-7.04008	6.63185062210862e-07	1.33945129766717e-05	6.00481	Healthy-Active
ENSG00000062524.16	LTK	1.78185	4.61621	7.03883	6.64929377366283e-07	1.3420948487103e-05	5.96999	Healthy-Active
ENSG00000023445.16	BIRC3	-1.91702	6.46958	-7.03826	6.6572152563716e-07	1.34281434173187e-05	5.78515	Healthy-Active
ENSG00000166598.16	HSP90B1	-0.865365	9.33829	-7.03634	6.6842500788453e-07	1.34738568790118e-05	5.61807	Healthy-Active
ENSG00000278794.1	Metazoa_SRP	3.14383	-4.03944	7.03498	6.70341957233724e-07	1.34983113920022e-05	5.12715	Healthy-Active
ENSG00000285128.1	AC092306.1	1.67849	1.4557	7.03486	6.70514089132583e-07	1.34983113920022e-05	6.17379	Healthy-Active
ENSG00000261664.5	TTC39A-AS1	1.75279	-0.287046	7.03402	6.71700096714609e-07	1.35133607577291e-05	6.06778	Healthy-Active
ENSG00000132622.11	HSPA12B	-2.16394	2.23309	-7.03363	6.72248374674439e-07	1.3515568920966e-05	6.15145	Healthy-Active
ENSG00000197381.16	ADARB1	-1.48752	3.6047	-7.03283	6.73388723526647e-07	1.35296700442078e-05	6.03644	Healthy-Active
ENSG00000245812.3	LINC02202	-2.92916	-1.98937	-7.03191	6.74686935235737e-07	1.35469224957007e-05	5.63397	Healthy-Active
ENSG00000172890.13	NADSYN1	0.633947	6.83454	7.0303	6.7698286282855e-07	1.35841724057544e-05	5.75093	Healthy-Active
ENSG00000126778.12	SIX1	-4.22267	-3.98021	-7.0289	6.78991227016686e-07	1.36156074221739e-05	5.12713	Healthy-Active
ENSG00000142798.20	HSPG2	-1.11296	6.93646	-7.02806	6.80191181014858e-07	1.36308012939265e-05	5.74714	Healthy-Active
ENSG00000204872.4	NAT8B	3.65221	-0.183619	7.02533	6.84109384496936e-07	1.36921282623933e-05	6.07791	Healthy-Active
ENSG00000162747.12	FCGR3B	-6.40399	-0.334228	-7.02531	6.84139954060076e-07	1.36921282623933e-05	6.11795	Healthy-Active
ENSG00000091436.17	MAP3K20	-1.60007	4.89036	-7.02453	6.85264232919031e-07	1.36959066825855e-05	5.90011	Healthy-Active
ENSG00000088682.14	COQ9	0.979279	6.18964	7.02451	6.85302111081213e-07	1.36959066825855e-05	5.78578	Healthy-Active
ENSG00000158711.14	ELK4	-0.650285	5.72041	-7.02426	6.85661854295107e-07	1.36959066825855e-05	5.82477	Healthy-Active
ENSG00000185155.12	MIXL1	-2.61599	0.445648	-7.02145	6.89737233814347e-07	1.37683881369119e-05	6.11429	Healthy-Active
ENSG00000180011.7	ZADH2	0.852665	5.90453	7.02016	6.91614899279286e-07	1.37969338580497e-05	5.80199	Healthy-Active
ENSG00000165915.14	SLC39A13	-0.925797	4.54913	-7.01944	6.92661203422527e-07	1.38074518880441e-05	5.92025	Healthy-Active
ENSG00000184292.7	TACSTD2	-2.18899	0.431557	-7.01918	6.93038125654722e-07	1.38074518880441e-05	6.11763	Healthy-Active
ENSG00000108950.12	FAM20A	-2.58008	1.97667	-7.01726	6.95856057522552e-07	1.38546379514874e-05	6.13144	Healthy-Active
ENSG00000180525.13	DIP2C-AS1	2.06704	3.28338	7.015	6.99187076852732e-07	1.3911972172807e-05	6.01549	Healthy-Active
ENSG00000132437.18	DDC	1.99155	5.50799	7.0146	6.99773816919796e-07	1.39146637492161e-05	5.81271	Healthy-Active
ENSG00000119514.7	GALNT12	1.95701	6.47262	7.01415	7.00432385177537e-07	1.39187792028091e-05	5.74342	Healthy-Active
ENSG00000108239.9	TBC1D12	0.839751	4.97146	7.01356	7.01310518092952e-07	1.39272496637519e-05	5.86193	Healthy-Active
ENSG00000158864.13	NDUFS2	0.692183	7.11047	7.0113	7.04664274920902e-07	1.39792682706303e-05	5.69215	Healthy-Active
ENSG00000138944.8	SHISAL1	-1.97664	2.19069	-7.0111	7.04963109985306e-07	1.39792682706303e-05	6.10673	Healthy-Active
ENSG00000167208.15	SNX20	-2.25142	2.4469	-7.01088	7.05290618760912e-07	1.39792682706303e-05	6.08379	Healthy-Active
ENSG00000150054.18	MPP7	1.31228	5.10399	7.0095	7.07336345002719e-07	1.40094296048249e-05	5.83351	Healthy-Active
ENSG00000242472.1	IGHJ5	-2.80799	-1.31705	-7.00925	7.07721420288519e-07	1.40094296048249e-05	5.8392	Healthy-Active
ENSG00000145040.4	UCN2	-5.00792	-3.55465	-7.0058	7.12888972642999e-07	1.4102664329801e-05	5.13596	Healthy-Active
ENSG00000106261.17	ZKSCAN1	0.735775	7.51828	7.00393	7.15708950748423e-07	1.41493685510052e-05	5.65419	Healthy-Active
ENSG00000157510.14	AFAP1L1	-1.73371	2.3626	-7.00241	7.18013122449674e-07	1.4185822081424e-05	6.07923	Healthy-Active
ENSG00000138172.11	CALHM2	-1.41436	3.22944	-7.00124	7.19787386928772e-07	1.42117662091811e-05	6.01294	Healthy-Active
ENSG00000161405.17	IKZF3	-1.97937	4.5331	-6.99975	7.22052723875387e-07	1.4247366839029e-05	5.87693	Healthy-Active
ENSG00000146374.14	RSPO3	-2.56552	1.37	-6.99876	7.23568258595467e-07	1.42681364671599e-05	6.09692	Healthy-Active
ENSG00000215021.10	PHB2	0.586147	7.27304	6.9969	7.26412515624402e-07	1.43150640307287e-05	5.65127	Healthy-Active
ENSG00000114270.18	COL7A1	-3.06879	4.61739	-6.99638	7.27210071700277e-07	1.43216240382583e-05	5.87371	Healthy-Active
ENSG00000137563.13	GGH	1.28337	5.63013	6.99227	7.33542606089608e-07	1.4437111534028e-05	5.75652	Healthy-Active
ENSG00000148942.15	SLC5A12	4.48825	-1.36811	6.98968	7.37572293401465e-07	1.45071574058242e-05	5.77392	Healthy-Active
ENSG00000145246.14	ATP10D	-1.04483	3.9917	-6.98899	7.38644756452698e-07	1.45189859940233e-05	5.90013	Healthy-Active
ENSG00000204219.11	TCEA3	1.93454	6.30704	6.98811	7.40021610626506e-07	1.453677887898e-05	5.69748	Healthy-Active
ENSG00000183048.12	SLC25A10	0.974685	3.23861	6.98712	7.41579311435088e-07	1.45571904249131e-05	5.96795	Healthy-Active
ENSG00000138755.6	CXCL9	-4.29031	2.78867	-6.98685	7.42005326158737e-07	1.45571904249131e-05	5.97514	Healthy-Active
ENSG00000183486.14	MX2	-1.74108	3.57539	-6.98587	7.43537251654427e-07	1.45779654155478e-05	5.93982	Healthy-Active
ENSG00000134533.6	RERG	-2.02188	1.86884	-6.98383	7.46749393207004e-07	1.46316357584444e-05	6.06787	Healthy-Active
ENSG00000127249.15	ATP13A4	2.2873	3.38684	6.98221	7.49314426326884e-07	1.46725666669764e-05	5.94288	Healthy-Active
ENSG00000239205.1	LINC02023	3.28795	1.6614	6.98014	7.5259580844937e-07	1.47244509741035e-05	6.05664	Healthy-Active
ENSG00000010610.10	CD4	-1.29737	5.57216	-6.97994	7.5291959168058e-07	1.47244509741035e-05	5.74234	Healthy-Active
ENSG00000134901.13	POGLUT2	-1.43439	1.76003	-6.97717	7.57340436306483e-07	1.48015152741928e-05	6.0527	Healthy-Active
ENSG00000143337.19	TOR1AIP1	-0.621451	5.46724	-6.97373	7.62870002775465e-07	1.49001371074414e-05	5.73814	Healthy-Active
ENSG00000176485.13	PLAAT3	-1.59253	2.6299	-6.97077	7.67655845666648e-07	1.49841170483165e-05	5.98095	Healthy-Active
ENSG00000188175.10	HEPACAM2	2.78621	6.47748	6.96913	7.7032261065587e-07	1.50266539133067e-05	5.64834	Healthy-Active
ENSG00000134061.5	CD180	-2.00592	3.06336	-6.96827	7.71734217250516e-07	1.50446681276902e-05	5.95957	Healthy-Active
ENSG00000186998.16	EMID1	-1.61029	3.97673	-6.96797	7.72226344147989e-07	1.50447459879805e-05	5.86363	Healthy-Active
ENSG00000198792.13	TMEM184B	-0.867921	5.92208	-6.96739	7.7316682507776e-07	1.50535532000768e-05	5.68909	Healthy-Active
ENSG00000267107.8	PCAT19	-2.32622	0.852244	-6.96647	7.74670884901843e-07	1.50733152421463e-05	6.02403	Healthy-Active
ENSG00000187079.20	TEAD1	-0.733927	5.4978	-6.96466	7.77647221858959e-07	1.51092440020691e-05	5.71444	Healthy-Active
ENSG00000108187.16	PBLD	2.00743	6.22436	6.96429	7.78252753246944e-07	1.51092440020691e-05	5.65338	Healthy-Active
ENSG00000135917.16	SLC19A3	2.10012	3.20239	6.96414	7.78508301663066e-07	1.51092440020691e-05	5.9338	Healthy-Active
ENSG00000263508.6	AC015908.2	1.9748	0.0072868	6.96395	7.78819064882909e-07	1.51092440020691e-05	5.97392	Healthy-Active
ENSG00000130762.15	ARHGEF16	1.07792	6.42182	6.96386	7.78968518843899e-07	1.51092440020691e-05	5.63564	Healthy-Active
ENSG00000119471.15	HSDL2	0.886291	5.94544	6.96263	7.80994364583713e-07	1.51390108873174e-05	5.67241	Healthy-Active
ENSG00000177272.9	KCNA3	-1.89204	1.99377	-6.96116	7.83423352432733e-07	1.51765500599178e-05	6.01021	Healthy-Active
ENSG00000150510.17	FAM124A	-1.9466	0.308175	-6.95772	7.89157920320043e-07	1.52780378531307e-05	5.97227	Healthy-Active
ENSG00000197535.15	MYO5A	-1.19174	4.6084	-6.95662	7.90989101760648e-07	1.53038764001035e-05	5.78076	Healthy-Active
ENSG00000158109.15	TPRG1L	0.838951	6.62642	6.95518	7.93413480037591e-07	1.5333067684609e-05	5.60988	Healthy-Active
ENSG00000223572.10	CKMT1A	1.339	4.55323	6.95513	7.93492844390231e-07	1.5333067684609e-05	5.76397	Healthy-Active
ENSG00000107554.17	DNMBP	1.02466	6.11534	6.95416	7.95129479690288e-07	1.5355066224019e-05	5.63802	Healthy-Active
ENSG00000121297.8	TSHZ3	-1.55984	2.74773	-6.95292	7.97210104918705e-07	1.53856059133998e-05	5.95518	Healthy-Active
ENSG00000009765.15	IYD	1.44639	4.96142	6.95238	7.98123372822228e-07	1.53935922864542e-05	5.72672	Healthy-Active
ENSG00000167741.11	GGT6	1.38204	7.30811	6.95201	7.98759834683251e-07	1.53962331862242e-05	5.54652	Healthy-Active
ENSG00000130669.17	PAK4	0.965918	6.50978	6.95123	8.00071993574477e-07	1.54118868212243e-05	5.60575	Healthy-Active
ENSG00000168209.6	DDIT4	-1.67039	5.28444	-6.95009	8.02003150806398e-07	1.54341373696413e-05	5.69835	Healthy-Active
ENSG00000143702.16	CEP170	-1.39515	1.98522	-6.94996	8.02228612509827e-07	1.54341373696413e-05	5.99029	Healthy-Active
ENSG00000215193.14	PEX26	1.53222	7.27462	6.94959	8.02863089788865e-07	1.54367082285606e-05	5.54895	Healthy-Active
ENSG00000204482.11	LST1	-1.80653	2.26071	-6.94897	8.03908434689095e-07	1.54471707391226e-05	5.96369	Healthy-Active
ENSG00000170439.7	METTL7B	1.29962	3.97661	6.94849	8.04732374408301e-07	1.54522787577278e-05	5.81573	Healthy-Active
ENSG00000113532.13	ST8SIA4	-1.43042	4.09831	-6.94823	8.05176979491609e-07	1.54522787577278e-05	5.81663	Healthy-Active
ENSG00000130559.19	CAMSAP1	-0.606976	4.27643	-6.94501	8.10684168288377e-07	1.55482867148824e-05	5.78478	Healthy-Active
ENSG00000076826.10	CAMSAP3	1.02592	5.71961	6.94302	8.14111519088164e-07	1.55933923083539e-05	5.6421	Healthy-Active
ENSG00000127124.16	HIVEP3	-1.27952	2.98787	-6.94288	8.14354235856015e-07	1.55933923083539e-05	5.90793	Healthy-Active
ENSG00000229314.5	ORM1	-3.86115	-4.87796	-6.94276	8.1455376582362e-07	1.55933923083539e-05	4.82189	Healthy-Active
ENSG00000124523.17	SIRT5	0.82828	4.63429	6.93874	8.21533820992821e-07	1.57172525740656e-05	5.73455	Healthy-Active
ENSG00000151553.15	FAM160B1	-0.680816	4.69282	-6.93824	8.22402129808149e-07	1.57191126862594e-05	5.72749	Healthy-Active
ENSG00000060656.20	PTPRU	-1.80415	1.70249	-6.93781	8.23156122961673e-07	1.57191126862594e-05	5.9739	Healthy-Active
ENSG00000113749.7	HRH2	-2.8285	1.02875	-6.93768	8.23383503075428e-07	1.57191126862594e-05	5.97517	Healthy-Active
ENSG00000095321.18	CRAT	0.986221	5.84406	6.93751	8.23671100493463e-07	1.57191126862594e-05	5.63187	Healthy-Active
ENSG00000166086.13	JAM3	-1.25395	2.88304	-6.93636	8.25692710065654e-07	1.57479424609737e-05	5.9128	Healthy-Active
ENSG00000161091.13	MFSD12	-0.704407	5.01115	-6.93601	8.26301252810522e-07	1.57498026672066e-05	5.69447	Healthy-Active
ENSG00000278857.1	IGKV1D-12	-2.55703	2.66982	-6.93497	8.28126626669335e-07	1.57685841543931e-05	5.9204	Healthy-Active
ENSG00000065833.9	ME1	-1.76857	4.08831	-6.93486	8.28309845428844e-07	1.57685841543931e-05	5.76188	Healthy-Active
ENSG00000167748.11	KLK1	2.34121	5.92846	6.93397	8.29881808438614e-07	1.57887575419053e-05	5.61648	Healthy-Active
ENSG00000222001.2	AC106876.1	1.94663	0.440609	6.93344	8.3082007049745e-07	1.57968571207908e-05	5.94069	Healthy-Active
ENSG00000079308.19	TNS1	-1.65811	5.69	-6.93189	8.33546322469697e-07	1.58389218278906e-05	5.64253	Healthy-Active
ENSG00000113758.13	DBN1	-1.51348	4.21637	-6.92793	8.40584575659494e-07	1.59628202134327e-05	5.76725	Healthy-Active
ENSG00000147100.11	SLC16A2	-1.57232	2.38895	-6.9271	8.42061915136672e-07	1.59810285014947e-05	5.92696	Healthy-Active
ENSG00000138073.14	PREB	-0.692905	5.68712	-6.92348	8.48544863036521e-07	1.60941545991684e-05	5.60853	Healthy-Active
ENSG00000187118.14	CMC1	0.625745	4.46265	6.92275	8.49876509439303e-07	1.61094980918996e-05	5.71573	Healthy-Active
ENSG00000189077.11	TMEM120A	0.85873	5.55937	6.92183	8.51524228011446e-07	1.61227910167332e-05	5.62281	Healthy-Active
ENSG00000170542.6	SERPINB9	-1.84529	4.1281	-6.92178	8.51624015289628e-07	1.61227910167332e-05	5.74446	Healthy-Active
ENSG00000143772.9	ITPKB	-1.09025	4.44673	-6.92125	8.52585675813245e-07	1.6131088467919e-05	5.7243	Healthy-Active
ENSG00000125430.9	HS3ST3B1	-1.31711	2.84149	-6.91948	8.55786300361263e-07	1.61817113886101e-05	5.87759	Healthy-Active
ENSG00000162645.13	GBP2	-1.08804	6.20987	-6.91876	8.57090633629234e-07	1.61964380251911e-05	5.55038	Healthy-Active
ENSG00000175600.16	SUGCT	1.94084	2.27173	6.91821	8.58090529558837e-07	1.62053971884393e-05	5.89671	Healthy-Active
ENSG00000163577.8	EIF5A2	-1.34059	1.80923	-6.91734	8.59673032195182e-07	1.62253414116887e-05	5.92418	Healthy-Active
ENSG00000182919.15	C11orf54	1.07519	5.35351	6.91695	8.6038585899875e-07	1.62288571359856e-05	5.62462	Healthy-Active
ENSG00000255474.1	GAU1	1.99209	3.37105	6.91616	8.61844643596008e-07	1.62386188209919e-05	5.79708	Healthy-Active
ENSG00000106077.18	ABHD11	0.966549	5.78568	6.91609	8.6195711985798e-07	1.62386188209919e-05	5.58207	Healthy-Active
ENSG00000135362.14	PRR5L	1.3911	6.19758	6.91542	8.63183162054999e-07	1.6243748192848e-05	5.54283	Healthy-Active
ENSG00000101670.12	LIPG	-1.59916	4.33125	-6.91537	8.63283460623762e-07	1.6243748192848e-05	5.68853	Healthy-Active
ENSG00000068366.20	ACSL4	-2.17693	5.45318	-6.91503	8.63899456346789e-07	1.62454210763053e-05	5.61059	Healthy-Active
ENSG00000122870.12	BICC1	-1.70133	3.05542	-6.91407	8.65667963403731e-07	1.62687514024795e-05	5.83942	Healthy-Active
ENSG00000154240.17	CEP112	-1.23528	2.02255	-6.91327	8.67145073312282e-07	1.62865803196574e-05	5.90969	Healthy-Active
ENSG00000158023.10	CFAP251	-1.77453	-0.169381	-6.91282	8.6796729112318e-07	1.62920949328304e-05	5.82763	Healthy-Active
ENSG00000071537.14	SEL1L	-0.763866	7.76251	-6.91201	8.69471302172036e-07	1.6310392577142e-05	5.43949	Healthy-Active
ENSG00000187630.17	DHRS4L2	1.39159	2.74404	6.91027	8.72679752138946e-07	1.635152062881e-05	5.85443	Healthy-Active
ENSG00000111961.18	SASH1	-0.912687	4.66497	-6.9101	8.72994913578171e-07	1.635152062881e-05	5.66838	Healthy-Active
ENSG00000111684.11	LPCAT3	0.931374	4.70949	6.90996	8.73255343922042e-07	1.635152062881e-05	5.66117	Healthy-Active
ENSG00000154016.14	GRAP	-2.5124	-0.770226	-6.90787	8.77137108018236e-07	1.64142336406983e-05	5.72262	Healthy-Active
ENSG00000197448.14	GSTK1	0.536052	7.47002	6.90603	8.8057619311726e-07	1.64628236946242e-05	5.44155	Healthy-Active
ENSG00000225361.4	PPP1R26-AS1	1.80834	3.01023	6.90591	8.80801929607583e-07	1.64628236946242e-05	5.82245	Healthy-Active
ENSG00000110324.11	IL10RA	-1.265	5.06628	-6.90535	8.81844128846299e-07	1.64723138758617e-05	5.62668	Healthy-Active
ENSG00000100055.21	CYTH4	-1.72199	4.73001	-6.9042	8.84010373630543e-07	1.65027763329297e-05	5.65613	Healthy-Active
ENSG00000113742.14	CPEB4	-0.92848	5.64604	-6.90158	8.88942062053491e-07	1.6584796183142e-05	5.56851	Healthy-Active
ENSG00000187609.16	EXD3	0.822671	4.67068	6.90099	8.90057195854272e-07	1.65955552531304e-05	5.6488	Healthy-Active
ENSG00000102316.17	MAGED2	-0.658392	6.18385	-6.89996	8.92010022892469e-07	1.66219110734999e-05	5.52458	Healthy-Active
ENSG00000286190.2	AC055839.2	-1.50101	1.78932	-6.89689	8.9784616407207e-07	1.67205538506739e-05	5.88677	Healthy-Active
ENSG00000071889.17	FAM3A	0.697311	5.60871	6.89555	9.00398989514744e-07	1.6754375904569e-05	5.55909	Healthy-Active
ENSG00000101194.18	SLC17A9	-1.62405	5.15793	-6.89537	9.00749517337883e-07	1.6754375904569e-05	5.59197	Healthy-Active
ENSG00000168748.14	CA7	3.97192	5.07574	6.89384	9.03687505599478e-07	1.67818548220801e-05	5.5719	Healthy-Active
ENSG00000131771.14	PPP1R1B	1.52642	7.82494	6.89382	9.03711521647287e-07	1.67818548220801e-05	5.39295	Healthy-Active
ENSG00000182463.16	TSHZ2	-1.88035	2.70818	-6.89375	9.0386032265835e-07	1.67818548220801e-05	5.83313	Healthy-Active
ENSG00000116704.8	SLC35D1	1.01916	6.89266	6.89256	9.06147817871674e-07	1.68141974079608e-05	5.44831	Healthy-Active
ENSG00000130244.12	FAM98C	0.669827	4.98272	6.89224	9.06764556232262e-07	1.68155176820906e-05	5.60345	Healthy-Active
ENSG00000179918.19	SEPHS2	1.11246	7.36392	6.88764	9.15664323692997e-07	1.69698308111119e-05	5.41072	Healthy-Active
ENSG00000235049.1	LINC00940	3.88085	-3.14111	6.88717	9.1658918129594e-07	1.69698308111119e-05	5.00507	Healthy-Active
ENSG00000164414.18	SLC35A1	0.814307	4.34917	6.88709	9.16737558823571e-07	1.69698308111119e-05	5.65155	Healthy-Active
ENSG00000227908.3	FLJ31104	2.12365	-0.756352	6.88617	9.18540736168597e-07	1.69877537443324e-05	5.72862	Healthy-Active
ENSG00000091490.11	SEL1L3	-0.666149	7.99479	-6.88603	9.18808133798454e-07	1.69877537443324e-05	5.36883	Healthy-Active
ENSG00000178927.18	CYBC1	-0.919109	6.28999	-6.88424	9.22310861493581e-07	1.70422920036533e-05	5.48471	Healthy-Active
ENSG00000211968.3	IGHV1-58	-3.55266	1.81156	-6.8832	9.24366120672288e-07	1.70700348743203e-05	5.85774	Healthy-Active
ENSG00000160999.10	SH2B2	-1.7011	2.32117	-6.87907	9.32517272312711e-07	1.72102484131438e-05	5.82289	Healthy-Active
ENSG00000237476.1	LINC01637	1.87365	2.3919	6.87427	9.42089389239111e-07	1.73765033307831e-05	5.80583	Healthy-Active
ENSG00000088836.14	SLC4A11	-2.72008	0.586708	-6.87358	9.43473417260407e-07	1.73909302625582e-05	5.82008	Healthy-Active
ENSG00000196456.13	ZNF775	1.4048	3.11685	6.87332	9.44000075573791e-07	1.73909302625582e-05	5.76028	Healthy-Active
ENSG00000112276.14	BVES	-1.52438	1.23462	-6.8716	9.47456654676049e-07	1.74441825291341e-05	5.84112	Healthy-Active
ENSG00000145365.11	TIFA	-1.15408	3.3635	-6.86561	9.59616973775783e-07	1.76575252231304e-05	5.69731	Healthy-Active
ENSG00000185168.5	LINC00482	1.81224	2.41241	6.85658	9.78265460476582e-07	1.79899282561747e-05	5.7725	Healthy-Active
ENSG00000043462.13	LCP2	-1.76877	4.66709	-6.85483	9.81907563284628e-07	1.80461377507427e-05	5.54568	Healthy-Active
ENSG00000254827.6	SLC22A18AS	1.74886	3.05702	6.85408	9.8348608195499e-07	1.8064376955861e-05	5.70464	Healthy-Active
ENSG00000102038.16	SMARCA1	-1.43032	3.25165	-6.8535	9.8468840948341e-07	1.80756887842098e-05	5.70075	Healthy-Active
ENSG00000006210.7	CX3CL1	-1.67312	3.0977	-6.85221	9.87402820980001e-07	1.81147275865623e-05	5.70306	Healthy-Active
ENSG00000164241.13	C5orf63	1.07859	3.57451	6.8515	9.88901408214253e-07	1.81314279015892e-05	5.6536	Healthy-Active
ENSG00000257556.2	LINC02298	1.93015	1.11314	6.85072	9.90551673793672e-07	1.81508877158114e-05	5.79758	Healthy-Active
ENSG00000126107.15	HECTD3	0.682485	6.75415	6.85011	9.91846795396026e-07	1.81638206065959e-05	5.37093	Healthy-Active
ENSG00000168924.15	LETM1	1.03351	6.83358	6.84961	9.92903846841278e-07	1.81723208693701e-05	5.36176	Healthy-Active
ENSG00000164488.12	DACT2	2.72232	1.16973	6.84889	9.94428213415676e-07	1.81723208693701e-05	5.79226	Healthy-Active
ENSG00000154589.7	LY96	-1.95813	1.83731	-6.84879	9.94634642449026e-07	1.81723208693701e-05	5.78453	Healthy-Active
ENSG00000184809.13	B3GALT5-AS1	4.66293	4.01685	6.8485	9.95253115200452e-07	1.81723208693701e-05	5.60521	Healthy-Active
ENSG00000115286.20	NDUFS7	0.732237	3.56024	6.84849	9.95258999626773e-07	1.81723208693701e-05	5.64713	Healthy-Active
ENSG00000176454.14	LPCAT4	0.790453	6.96775	6.84658	9.99328782130054e-07	1.82305511178901e-05	5.34812	Healthy-Active
ENSG00000178996.14	SNX18	-0.946307	4.47731	-6.84624	1.00004223131844e-06	1.82305511178901e-05	5.55206	Healthy-Active
ENSG00000105928.16	GSDME	-1.72288	0.834596	-6.84616	1.00022263847222e-06	1.82305511178901e-05	5.77778	Healthy-Active
ENSG00000132535.21	DLG4	-1.30135	3.42271	-6.84551	1.00161849150592e-06	1.82452030299669e-05	5.66471	Healthy-Active
ENSG00000123612.16	ACVR1C	2.30582	4.02212	6.84428	1.00424421950364e-06	1.82822274597292e-05	5.57463	Healthy-Active
ENSG00000133026.13	MYH10	-1.81943	3.78871	-6.84315	1.00665561119354e-06	1.83153084962197e-05	5.62694	Healthy-Active
ENSG00000166923.12	GREM1	-5.08259	-2.53023	-6.83963	1.0142519571762e-06	1.84426310160045e-05	5.10843	Healthy-Active
ENSG00000127328.22	RAB3IP	1.04614	4.89374	6.83575	1.02268809271709e-06	1.85850646849254e-05	5.48383	Healthy-Active
ENSG00000227748.2	AL138916.1	3.57138	-2.76082	6.83451	1.0253887071124e-06	1.86231616628823e-05	5.0482	Healthy-Active
ENSG00000172183.16	ISG20	-1.65395	5.1904	-6.83397	1.02657497285989e-06	1.86337262888778e-05	5.44311	Healthy-Active
ENSG00000154133.15	ROBO4	-2.12091	2.7265	-6.83334	1.02795290585137e-06	1.86477554509977e-05	5.70113	Healthy-Active
ENSG00000116833.14	NR5A2	1.2563	5.60744	6.83195	1.03100664587547e-06	1.86921504897222e-05	5.41639	Healthy-Active
ENSG00000125356.7	NDUFA1	0.700764	5.74153	6.83027	1.03471193778112e-06	1.87482990207831e-05	5.40125	Healthy-Active
ENSG00000107669.18	ATE1	0.653629	5.6331	6.82919	1.03709753520868e-06	1.87804836267137e-05	5.4092	Healthy-Active
ENSG00000228253.1	MT-ATP8	1.04814	9.53828	6.82881	1.03794426526375e-06	1.878113549782e-05	5.16401	Healthy-Active
ENSG00000166391.15	MOGAT2	1.90023	6.54027	6.82862	1.03835225619822e-06	1.878113549782e-05	5.33836	Healthy-Active
ENSG00000125863.20	MKKS	0.792954	4.71854	6.82815	1.03939206531054e-06	1.8788916624596e-05	5.48782	Healthy-Active
ENSG00000182240.16	BACE2	-1.73864	6.19199	-6.82741	1.04103665972548e-06	1.88076148237977e-05	5.34713	Healthy-Active
ENSG00000010671.16	BTK	-1.85361	3.72367	-6.82653	1.04300625895198e-06	1.88321592894897e-05	5.58632	Healthy-Active
ENSG00000141582.15	CBX4	-1.12008	4.41276	-6.82623	1.04366681449828e-06	1.88330532140816e-05	5.51763	Healthy-Active
ENSG00000182173.14	TSEN54	0.562242	5.09182	6.82489	1.04665077233835e-06	1.88758475449037e-05	5.44888	Healthy-Active
ENSG00000112559.15	MDFI	-3.28924	0.7097	-6.82367	1.04938827223915e-06	1.89063462208166e-05	5.73997	Healthy-Active
ENSG00000244586.1	WNT5A-AS1	-2.45034	-1.11574	-6.82359	1.04956874805546e-06	1.89063462208166e-05	5.52196	Healthy-Active
ENSG00000112695.11	COX7A2	0.773776	6.92381	6.82077	1.05589794520583e-06	1.90092468277973e-05	5.29133	Healthy-Active
ENSG00000105483.18	CARD8	-1.15702	5.18967	-6.81893	1.06006184789209e-06	1.90696829050906e-05	5.42997	Healthy-Active
ENSG00000164219.10	PGGT1B	0.663493	5.87463	6.81874	1.06049240775203e-06	1.90696829050906e-05	5.36848	Healthy-Active
ENSG00000189157.14	FAM47E	1.72791	1.28305	6.81685	1.06477885236037e-06	1.9135597089562e-05	5.7295	Healthy-Active
ENSG00000165215.6	CLDN3	1.12535	8.0716	6.81532	1.06826655719996e-06	1.91870883213637e-05	5.20565	Healthy-Active
ENSG00000155962.13	CLIC2	-1.05865	3.75973	-6.8127	1.07426112553411e-06	1.92835190157757e-05	5.55185	Healthy-Active
ENSG00000253217.1	AP001574.1	3.52414	-2.91324	6.81156	1.07688924198019e-06	1.93194431473058e-05	5.01018	Healthy-Active
ENSG00000211598.2	IGKV4-1	-2.30531	8.28213	-6.81041	1.0795197484154e-06	1.93553683338633e-05	5.19134	Healthy-Active
ENSG00000183049.13	CAMK1D	1.14405	6.22234	6.80802	1.08505239561277e-06	1.94432557471984e-05	5.3189	Healthy-Active
ENSG00000164258.12	NDUFS4	0.657725	4.91463	6.80725	1.08685317353638e-06	1.94511042120538e-05	5.4193	Healthy-Active
ENSG00000137573.14	SULF1	-2.37483	4.92063	-6.80702	1.08738269866562e-06	1.94511042120538e-05	5.42874	Healthy-Active
ENSG00000171867.18	PRNP	-1.11963	5.71266	-6.80702	1.08738368506436e-06	1.94511042120538e-05	5.36412	Healthy-Active
ENSG00000072786.13	STK10	-0.991355	5.44187	-6.8059	1.08997604788312e-06	1.94861669210009e-05	5.3754	Healthy-Active
ENSG00000005249.13	PRKAR2B	-1.13118	3.38275	-6.80363	1.09529532421807e-06	1.95699114131739e-05	5.5717	Healthy-Active
ENSG00000197943.10	PLCG2	-1.65347	5.13568	-6.80307	1.09658792516967e-06	1.95816549488149e-05	5.39917	Healthy-Active
ENSG00000251546.1	IGKV1D-39	-2.07784	4.748	-6.80087	1.1017611524359e-06	1.96569308719022e-05	5.43597	Healthy-Active
ENSG00000170469.11	SPATA24	1.39919	2.71841	6.8002	1.10333379286375e-06	1.96569308719022e-05	5.62781	Healthy-Active
ENSG00000122862.5	SRGN	-2.09963	6.05771	-6.8002	1.10334817062711e-06	1.96569308719022e-05	5.31434	Healthy-Active
ENSG00000165959.12	CLMN	1.22021	7.02391	6.80007	1.10364956080632e-06	1.96569308719022e-05	5.24199	Healthy-Active
ENSG00000152104.12	PTPN14	-1.41013	3.50394	-6.79993	1.10399232144521e-06	1.96569308719022e-05	5.55534	Healthy-Active
ENSG00000154856.13	APCDD1	-1.65987	4.11983	-6.7986	1.10713579269061e-06	1.97015197843633e-05	5.49308	Healthy-Active
ENSG00000126882.13	FAM78A	-1.72372	3.49501	-6.79655	1.11199518588979e-06	1.97765745091225e-05	5.54302	Healthy-Active
ENSG00000136167.15	LCP1	-1.99635	6.37766	-6.79565	1.11413793442231e-06	1.97829462659154e-05	5.27881	Healthy-Active
ENSG00000151327.13	FAM177A1	0.750574	6.41252	6.79564	1.11414925031983e-06	1.97829462659154e-05	5.27711	Healthy-Active
ENSG00000135439.11	AGAP2	-1.61154	2.47341	-6.79559	1.1142790538149e-06	1.97829462659154e-05	5.63938	Healthy-Active
ENSG00000178802.18	MPI	0.662999	5.42288	6.79488	1.11596160077553e-06	1.97833480841722e-05	5.35335	Healthy-Active
ENSG00000143119.14	CD53	-1.75475	5.42308	-6.7948	1.11615166516878e-06	1.97833480841722e-05	5.35671	Healthy-Active
ENSG00000140995.17	DEF8	-0.912754	5.27097	-6.79451	1.11684593313239e-06	1.97833480841722e-05	5.37229	Healthy-Active
ENSG00000120498.14	TEX11	2.23397	1.32849	6.7945	1.11686920172803e-06	1.97833480841722e-05	5.6821	Healthy-Active
ENSG00000162413.16	KLHL21	-0.80272	4.68897	-6.7936	1.1190332244853e-06	1.98102946650553e-05	5.42131	Healthy-Active
ENSG00000132361.18	CLUH	0.866388	7.12621	6.79194	1.12300466692515e-06	1.98691887711251e-05	5.21459	Healthy-Active
ENSG00000250602.6	AC093535.1	1.77177	-0.0320475	6.79063	1.12616063914546e-06	1.99102807294601e-05	5.63241	Healthy-Active
ENSG00000176463.14	SLCO3A1	-1.17213	3.84451	-6.79037	1.12677794412105e-06	1.99102807294601e-05	5.48791	Healthy-Active
ENSG00000073910.23	FRY	-1.11518	3.65627	-6.79017	1.12726517221725e-06	1.99102807294601e-05	5.52305	Healthy-Active
ENSG00000204304.12	PBX2	-0.691292	4.65023	-6.78978	1.12820108505751e-06	1.99153984207088e-05	5.41812	Healthy-Active
ENSG00000177542.11	SLC25A22	-0.752894	4.01815	-6.78409	1.14203615630339e-06	2.01480803511314e-05	5.45318	Healthy-Active
ENSG00000198695.2	MT-ND6	0.872688	11.5971	6.78161	1.14810384664675e-06	2.02435404219105e-05	4.97909	Healthy-Active
ENSG00000183386.10	FHL3	-1.95911	2.01653	-6.78093	1.14977526995244e-06	2.02614200086931e-05	5.63843	Healthy-Active
ENSG00000267121.6	AC008105.2	-2.17002	2.44069	-6.78031	1.15131587837912e-06	2.02769752500131e-05	5.60951	Healthy-Active
ENSG00000151150.22	ANK3	1.61017	5.57939	6.77955	1.1531903586738e-06	2.02983895172389e-05	5.31158	Healthy-Active
ENSG00000123178.15	SPRYD7	0.841888	4.50452	6.77871	1.15524759581273e-06	2.03229943781645e-05	5.3925	Healthy-Active
ENSG00000124875.10	CXCL6	-5.21357	0.655571	-6.77802	1.15695970719846e-06	2.03415032148111e-05	5.64789	Healthy-Active
ENSG00000196588.20	MRTFA	-0.569233	5.01971	-6.77435	1.16608429308607e-06	2.04902417315883e-05	5.3426	Healthy-Active
ENSG00000155307.19	SAMSN1	-1.75723	3.59811	-6.77265	1.17035120161279e-06	2.05535010740215e-05	5.48488	Healthy-Active
ENSG00000090263.16	MRPS33	0.816807	5.13554	6.77177	1.17256379709992e-06	2.05806314296223e-05	5.32635	Healthy-Active
ENSG00000132024.18	CC2D1A	0.937914	6.24226	6.77088	1.17479184137461e-06	2.06080019026789e-05	5.23419	Healthy-Active
ENSG00000130005.13	GAMT	-1.40346	1.3099	-6.77029	1.17627491590086e-06	2.06222805363939e-05	5.63395	Healthy-Active
ENSG00000274536.7	MIR223HG	-2.35716	1.74332	-6.7694	1.17851383461628e-06	2.06385137528067e-05	5.61518	Healthy-Active
ENSG00000168314.17	MOBP	4.1587	-1.17266	6.76939	1.17854009295415e-06	2.06385137528067e-05	5.43644	Healthy-Active
ENSG00000135744.9	AGT	-1.99994	3.1898	-6.76846	1.18090673934564e-06	2.06665658123423e-05	5.51675	Healthy-Active
ENSG00000166265.13	CYYR1	-1.70208	3.61173	-6.76823	1.18148304601885e-06	2.06665658123423e-05	5.4774	Healthy-Active
ENSG00000083444.17	PLOD1	-1.02987	5.77926	-6.76733	1.18374712158457e-06	2.06944242962892e-05	5.26945	Healthy-Active
ENSG00000096070.19	BRPF3	0.906734	6.51337	6.76447	1.19104102540912e-06	2.08101334717315e-05	5.19824	Healthy-Active
ENSG00000017483.15	SLC38A5	-1.12532	4.07663	-6.76339	1.19380266625714e-06	2.08465676921877e-05	5.39507	Healthy-Active
ENSG00000173269.14	MMRN2	-1.79544	3.73424	-6.76132	1.19910642501542e-06	2.09273267980749e-05	5.4465	Healthy-Active
ENSG00000273962.1	IGKV2-40	-3.0355	1.13461	-6.75908	1.20487130261705e-06	2.10160375879797e-05	5.61028	Healthy-Active
ENSG00000196189.13	SEMA4A	-1.29433	3.98656	-6.7588	1.20558786962064e-06	2.10166423809829e-05	5.41286	Healthy-Active
ENSG00000280219.1	AC093908.1	-3.22376	-1.32957	-6.7561	1.2125833531205e-06	2.112664303365e-05	5.33242	Healthy-Active
ENSG00000130159.14	ECSIT	0.777326	5.32247	6.75487	1.21579802297021e-06	2.11706841050649e-05	5.27527	Healthy-Active
ENSG00000225385.3	AL353572.1	2.7889	-1.02944	6.75436	1.21712267246298e-06	2.11817831100969e-05	5.42608	Healthy-Active
ENSG00000166780.11	BMERB1	-1.74474	1.49575	-6.75263	1.22164411517101e-06	2.124847250208e-05	5.59682	Healthy-Active
ENSG00000166145.14	SPINT1	1.21552	7.98262	6.7487	1.23198285449583e-06	2.14162118208776e-05	5.06958	Healthy-Active
ENSG00000144369.13	FAM171B	-1.49781	2.43167	-6.74817	1.2333931139123e-06	2.14265528116738e-05	5.54487	Healthy-Active
ENSG00000072133.11	RPS6KA6	2.28303	3.96508	6.74795	1.23396811397168e-06	2.14265528116738e-05	5.37349	Healthy-Active
ENSG00000166819.12	PLIN1	2.2065	0.430917	6.74738	1.23547314895503e-06	2.14406069391571e-05	5.56359	Healthy-Active
ENSG00000185187.13	SIGIRR	0.611242	5.97884	6.74395	1.24459551343149e-06	2.15867632636309e-05	5.1981	Healthy-Active
ENSG00000234770.1	GULOP	3.76692	-3.17655	6.74211	1.24953942191143e-06	2.16603231286457e-05	4.80731	Healthy-Active
ENSG00000139180.11	NDUFA9	0.840448	3.58525	6.74113	1.25217119704125e-06	2.1693742812821e-05	5.40641	Healthy-Active
ENSG00000206538.9	VGLL3	-2.36749	1.39393	-6.73976	1.2558406264127e-06	2.17245046841259e-05	5.57106	Healthy-Active
ENSG00000176903.5	PNMA1	-1.05463	4.74993	-6.73946	1.25666061281089e-06	2.17245046841259e-05	5.2953	Healthy-Active
ENSG00000231437.3	LINC01750	-3.45089	-1.66587	-6.7394	1.25680261624211e-06	2.17245046841259e-05	5.36124	Healthy-Active
ENSG00000172273.13	HINFP	0.653019	4.76138	6.73939	1.25683708273846e-06	2.17245046841259e-05	5.29425	Healthy-Active
ENSG00000233041.8	PHGR1	2.15064	9.42998	6.73916	1.25747108648261e-06	2.17245046841259e-05	4.96597	Healthy-Active
ENSG00000164741.15	DLC1	-1.68855	2.45532	-6.73853	1.25916322951182e-06	2.1741551762904e-05	5.52138	Healthy-Active
ENSG00000068001.14	HYAL2	-1.3966	4.2218	-6.73698	1.26336871929876e-06	2.18019525741921e-05	5.34436	Healthy-Active
ENSG00000132793.12	LPIN3	1.09655	5.69595	6.73618	1.26553680701893e-06	2.18271460151821e-05	5.20593	Healthy-Active
ENSG00000119917.15	IFIT3	-1.8165	3.7209	-6.73494	1.26890745719455e-06	2.18730406813161e-05	5.35132	Healthy-Active
ENSG00000101665.9	SMAD7	0.888403	5.52769	6.7325	1.27557105050127e-06	2.1975615062884e-05	5.21109	Healthy-Active
ENSG00000072840.13	EVC	-1.33727	2.79472	-6.73074	1.28039540128318e-06	2.20464059569548e-05	5.48749	Healthy-Active
ENSG00000101695.9	RNF125	1.03832	4.951	6.72984	1.28287361114983e-06	2.20767434780843e-05	5.26074	Healthy-Active
ENSG00000249763.1	AC114786.1	3.366	-3.29897	6.72946	1.28393263905331e-06	2.20826383193426e-05	4.7414	Healthy-Active
ENSG00000137634.10	NXPE4	2.70517	7.14369	6.72826	1.28724488120861e-06	2.21272584962245e-05	5.07315	Healthy-Active
ENSG00000233532.6	LINC00460	-3.91333	-4.28671	-6.72703	1.29063652184934e-06	2.21731929988397e-05	4.52654	Healthy-Active
ENSG00000064932.16	SBNO2	-1.3389	6.13845	-6.7267	1.29156273147081e-06	2.21767437028757e-05	5.13947	Healthy-Active
ENSG00000147408.14	CSGALNACT1	-2.22614	2.87718	-6.72437	1.29802736768588e-06	2.22753349106049e-05	5.45695	Healthy-Active
ENSG00000224259.7	LINC01133	1.68363	5.51897	6.72399	1.29909566474423e-06	2.22792963032041e-05	5.18516	Healthy-Active
ENSG00000167552.15	TUBA1A	-1.32241	5.37663	-6.72377	1.29970392761951e-06	2.22792963032041e-05	5.21247	Healthy-Active
ENSG00000259823.6	LYPD8	2.74426	6.21214	6.72264	1.30286022198192e-06	2.23209866046163e-05	5.13488	Healthy-Active
ENSG00000135842.17	NIBAN1	-1.70046	4.47987	-6.71937	1.31204574805437e-06	2.24513376460782e-05	5.28657	Healthy-Active
ENSG00000175309.15	PHYKPL	0.755777	7.03303	6.71926	1.31235531769317e-06	2.24513376460782e-05	5.06829	Healthy-Active
ENSG00000188906.17	LRRK2	-2.07795	3.13818	-6.71916	1.31265404880545e-06	2.24513376460782e-05	5.41763	Healthy-Active
ENSG00000099834.19	CDHR5	1.38475	7.87193	6.71748	1.31738147679799e-06	2.2519452551704e-05	5.00761	Healthy-Active
ENSG00000172889.16	EGFL7	-1.68692	3.68639	-6.71723	1.31809780355193e-06	2.2519452551704e-05	5.35837	Healthy-Active
ENSG00000287335.1	AL139351.3	-4.43559	-3.512	-6.71663	1.31980898208593e-06	2.25361953666872e-05	4.71725	Healthy-Active
ENSG00000226015.2	CCT8P1	1.50438	1.91379	6.71558	1.32277436484863e-06	2.25743237535989e-05	5.50239	Healthy-Active
ENSG00000152661.9	GJA1	-1.73307	5.10532	-6.71411	1.32697593699619e-06	2.26334949386606e-05	5.21039	Healthy-Active
ENSG00000171658.8	NMRAL2P	1.69655	2.79743	6.71365	1.32827857734657e-06	2.26431825400436e-05	5.4243	Healthy-Active
ENSG00000142515.15	KLK3	2.65764	1.48818	6.71203	1.33291620121446e-06	2.26992184423792e-05	5.50943	Healthy-Active
ENSG00000167699.13	GLOD4	0.665904	6.3601	6.71199	1.33303868728161e-06	2.26992184423792e-05	5.09941	Healthy-Active
ENSG00000049283.18	EPN3	1.69702	4.5142	6.70975	1.33945539602976e-06	2.27958888796429e-05	5.24066	Healthy-Active
ENSG00000137700.18	SLC37A4	1.19439	3.41513	6.70942	1.34042533152312e-06	2.27998063702395e-05	5.35443	Healthy-Active
ENSG00000091138.13	SLC26A3	2.74163	10.7365	6.70598	1.35037570274168e-06	2.29476326378401e-05	4.838	Healthy-Active
ENSG00000056558.11	TRAF1	-1.73646	3.53307	-6.7059	1.35060528876551e-06	2.29476326378401e-05	5.35382	Healthy-Active
ENSG00000114251.15	WNT5A	-2.65106	4.42784	-6.70481	1.35375827509259e-06	2.29885310174263e-05	5.25413	Healthy-Active
ENSG00000068912.14	ERLEC1	-0.748552	6.5315	-6.70306	1.35888410148845e-06	2.3062867231264e-05	5.06501	Healthy-Active
ENSG00000169896.18	ITGAM	-1.88807	3.2842	-6.70252	1.36043858785734e-06	2.30765424966159e-05	5.3711	Healthy-Active
ENSG00000159164.10	SV2A	-1.54462	1.78643	-6.70055	1.36622115238364e-06	2.31618823639254e-05	5.48229	Healthy-Active
ENSG00000176435.7	CLEC14A	-1.76172	3.20074	-6.6989	1.37108937546957e-06	2.32269041917093e-05	5.3737	Healthy-Active
ENSG00000198744.5	MTCO3P12	1.79721	1.29002	6.69848	1.37231188046383e-06	2.32269041917093e-05	5.48393	Healthy-Active
ENSG00000136828.19	RALGPS1	1.05627	5.06532	6.69848	1.37231733341237e-06	2.32269041917093e-05	5.17614	Healthy-Active
ENSG00000205846.4	CLEC6A	-4.2103	-4.18023	-6.69767	1.37470477806245e-06	2.32545422418567e-05	4.63328	Healthy-Active
ENSG00000143369.15	ECM1	-1.74389	4.23502	-6.69711	1.37638710857165e-06	2.32652053476947e-05	5.26641	Healthy-Active
ENSG00000102362.15	SYTL4	0.984567	4.63162	6.69695	1.37684483158221e-06	2.32652053476947e-05	5.21051	Healthy-Active
ENSG00000260963.2	AC026462.3	2.19092	-0.0189539	6.69666	1.3777065842942e-06	2.32670107586474e-05	5.43122	Healthy-Active
ENSG00000072778.20	ACADVL	0.542512	9.26129	6.69626	1.37889699818976e-06	2.32743616545491e-05	4.88726	Healthy-Active
ENSG00000279368.1	AL031123.3	2.14754	-0.135533	6.69308	1.38835902905889e-06	2.34110401422077e-05	5.42783	Healthy-Active
ENSG00000185000.12	DGAT1	0.815283	6.68218	6.69293	1.38882452461544e-06	2.34110401422077e-05	5.03346	Healthy-Active
ENSG00000172817.4	CYP7B1	-2.12584	2.79431	-6.69265	1.38964437090599e-06	2.34110401422077e-05	5.38865	Healthy-Active
ENSG00000079263.19	SP140	-2.15997	2.91954	-6.69245	1.39025722760453e-06	2.34110401422077e-05	5.38171	Healthy-Active
ENSG00000001626.16	CFTR	1.49535	7.31138	6.69227	1.39079246294352e-06	2.34110401422077e-05	4.98431	Healthy-Active
ENSG00000064989.13	CALCRL	-1.62417	3.94207	-6.69177	1.39226947633057e-06	2.34141261373993e-05	5.2889	Healthy-Active
ENSG00000131018.24	SYNE1	-1.01371	5.30967	-6.6917	1.39249515621988e-06	2.34141261373993e-05	5.14859	Healthy-Active
ENSG00000205364.4	MT1M	4.63886	2.89257	6.69116	1.39410710155073e-06	2.34166524942853e-05	5.38012	Healthy-Active
ENSG00000066056.14	TIE1	-1.85031	3.63536	-6.69103	1.39450211368399e-06	2.34166524942853e-05	5.31488	Healthy-Active
ENSG00000072952.19	IRAG1	-1.54274	4.445	-6.69089	1.39492469353713e-06	2.34166524942853e-05	5.22516	Healthy-Active
ENSG00000104154.7	SLC30A4	0.805915	4.97097	6.68863	1.40173897881129e-06	2.35182346575628e-05	5.16328	Healthy-Active
ENSG00000149257.16	SERPINH1	-1.2653	6.38016	-6.68782	1.40418590874108e-06	2.35464711062617e-05	5.0496	Healthy-Active
ENSG00000249896.2	LINC02495	-4.15957	-3.86534	-6.68734	1.40561515887625e-06	2.35576208872893e-05	4.59741	Healthy-Active
ENSG00000117090.15	SLAMF1	-1.9104	2.71943	-6.68708	1.40641958881372e-06	2.3558292471102e-05	5.38584	Healthy-Active
ENSG00000131459.13	GFPT2	-2.93964	0.878578	-6.68646	1.40828681224459e-06	2.35683738371756e-05	5.45418	Healthy-Active
ENSG00000185885.17	IFITM1	-1.40674	5.05667	-6.68628	1.40882526514368e-06	2.35683738371756e-05	5.1285	Healthy-Active
ENSG00000014641.21	MDH1	0.695809	6.80593	6.68593	1.40990446562732e-06	2.35683738371756e-05	5.00887	Healthy-Active
ENSG00000114948.13	ADAM23	-1.64089	1.54784	-6.68583	1.41019203959565e-06	2.35683738371756e-05	5.45627	Healthy-Active
ENSG00000164430.17	CGAS	-1.36029	2.78688	-6.68562	1.41084486971834e-06	2.35683738371756e-05	5.37438	Healthy-Active
ENSG00000146555.19	SDK1	-2.23236	3.12472	-6.68532	1.41173647041859e-06	2.35704928249032e-05	5.36777	Healthy-Active
ENSG00000135899.19	SP110	-1.17688	4.67639	-6.68506	1.41255099818627e-06	2.35713233974548e-05	5.18098	Healthy-Active
ENSG00000196372.13	ASB13	0.989205	5.46373	6.68349	1.41733216687377e-06	2.3634105077188e-05	5.1141	Healthy-Active
ENSG00000047936.11	ROS1	2.41043	0.918397	6.68332	1.41784693188802e-06	2.3634105077188e-05	5.44935	Healthy-Active
ENSG00000211941.3	IGHV3-11	-2.17156	5.93933	-6.68207	1.42167050261596e-06	2.36850305735819e-05	5.0832	Healthy-Active
ENSG00000141338.14	ABCA8	1.84426	5.15613	6.68036	1.42692026993749e-06	2.37559687951823e-05	5.14916	Healthy-Active
ENSG00000214293.9	APTR	0.8572	3.92279	6.68018	1.42747004343395e-06	2.37559687951823e-05	5.24005	Healthy-Active
ENSG00000063587.15	ZNF275	-0.797671	4.43283	-6.67838	1.43300962159192e-06	2.38352884765701e-05	5.1931	Healthy-Active
ENSG00000115956.10	PLEK	-2.46576	4.47036	-6.67777	1.43488998276556e-06	2.38536915635476e-05	5.175	Healthy-Active
ENSG00000211655.3	IGLV1-36	-3.29443	3.43973	-6.6757	1.44130936877376e-06	2.39386866629131e-05	5.35021	Healthy-Active
ENSG00000171970.13	ZNF57	1.30354	0.0152212	6.6756	1.44162884486425e-06	2.39386866629131e-05	5.40116	Healthy-Active
ENSG00000027869.12	SH2D2A	-1.43701	1.80207	-6.67537	1.44233286178351e-06	2.39386866629131e-05	5.4189	Healthy-Active
ENSG00000258918.1	AL355922.4	3.27137	-3.56042	6.67028	1.45822007347568e-06	2.41893438560785e-05	4.64518	Healthy-Active
ENSG00000079337.16	RAPGEF3	-1.2352	3.83549	-6.66926	1.4614478187403e-06	2.42279512478045e-05	5.23743	Healthy-Active
ENSG00000213563.7	C8orf82	0.89765	5.39514	6.66905	1.46211963664113e-06	2.42279512478045e-05	5.08211	Healthy-Active
ENSG00000080561.14	MID2	-1.31466	2.33566	-6.66749	1.46701599100159e-06	2.42958357155576e-05	5.37918	Healthy-Active
ENSG00000167566.17	NCKAP5L	-1.46235	3.07954	-6.66706	1.46839189233467e-06	2.42958357155576e-05	5.31349	Healthy-Active
ENSG00000241224.8	C3orf85	2.03079	3.42418	6.66682	1.46914988834474e-06	2.42958357155576e-05	5.26698	Healthy-Active
ENSG00000178935.5	ZNF552	0.839208	4.14107	6.66675	1.46936951344211e-06	2.42958357155576e-05	5.18984	Healthy-Active
ENSG00000234593.3	KAZN-AS1	3.67441	-2.15883	6.66174	1.48531968436822e-06	2.45464010680498e-05	4.96925	Healthy-Active
ENSG00000138660.12	AP1AR	0.816336	5.55603	6.65948	1.49258912406885e-06	2.4647556209712e-05	5.04362	Healthy-Active
ENSG00000176720.6	BOK	-1.05737	3.78386	-6.65934	1.49304005202726e-06	2.4647556209712e-05	5.2194	Healthy-Active
ENSG00000124786.12	SLC35B3	0.627535	5.80229	6.65855	1.49556530175933e-06	2.46760268552058e-05	5.02253	Healthy-Active
ENSG00000241837.7	ATP5PO	0.765836	3.89748	6.65739	1.49931243775739e-06	2.47246167170254e-05	5.19964	Healthy-Active
ENSG00000120280.6	TASL	-1.4589	2.14724	-6.65707	1.50034944820379e-06	2.47284868144861e-05	5.3692	Healthy-Active
ENSG00000136848.17	DAB2IP	0.78533	7.37311	6.6564	1.50254706543201e-06	2.47514714610796e-05	4.90563	Healthy-Active
ENSG00000169860.7	P2RY1	2.06818	5.24108	6.65554	1.50531428166575e-06	2.47838095487287e-05	5.05634	Healthy-Active
ENSG00000168005.9	SPINDOC	-1.04798	3.25005	-6.65411	1.5099876038228e-06	2.48474788774279e-05	5.26816	Healthy-Active
ENSG00000180182.11	MED14	0.634672	6.07324	6.65328	1.51266842590874e-06	2.48783103281394e-05	4.99325	Healthy-Active
ENSG00000096968.14	JAK2	-0.829623	5.15145	-6.65233	1.51578245906835e-06	2.49162299578376e-05	5.06057	Healthy-Active
ENSG00000113790.11	EHHADH	0.965912	5.04261	6.65136	1.51895448937448e-06	2.4955062002671e-05	5.06666	Healthy-Active
ENSG00000058262.10	SEC61A1	-0.636176	7.94416	-6.65072	1.5210528115052e-06	2.4976222005009e-05	4.85573	Healthy-Active
ENSG00000107099.16	DOCK8	-1.36607	5.12119	-6.65019	1.52279970335058e-06	2.49915919366178e-05	5.07069	Healthy-Active
ENSG00000106004.5	HOXA5	1.41743	4.17576	6.64962	1.52466287421244e-06	2.50088528185746e-05	5.14962	Healthy-Active
ENSG00000178188.14	SH2B1	0.587996	6.70837	6.64873	1.52758428486134e-06	2.50434442785699e-05	4.93884	Healthy-Active
ENSG00000108387.15	SEPTIN4	-1.45309	2.21594	-6.64808	1.52973097547603e-06	2.50653048352721e-05	5.3473	Healthy-Active
ENSG00000168994.14	PXDC1	-1.55767	2.65274	-6.64701	1.53327164381397e-06	2.51099709532361e-05	5.30692	Healthy-Active
ENSG00000089876.12	DHX32	0.899535	5.83893	6.64646	1.53509033217169e-06	2.51264042102304e-05	4.99164	Healthy-Active
ENSG00000116017.11	ARID3A	-1.20761	4.27684	-6.64567	1.53771782575267e-06	2.51560515432712e-05	5.13901	Healthy-Active
ENSG00000196391.11	ZNF774	1.25867	3.56148	6.64514	1.53949696125554e-06	2.51717962031071e-05	5.21064	Healthy-Active
ENSG00000188833.10	ENTPD8	1.32714	6.35661	6.64342	1.54521782335354e-06	2.52519398375289e-05	4.9538	Healthy-Active
ENSG00000203739.4	PRDX6-AS1	1.53674	2.54483	6.64306	1.54639369281071e-06	2.52577636492416e-05	5.32658	Healthy-Active
ENSG00000211938.2	IGHV3-7	-2.08733	6.67029	-6.64141	1.55191991895731e-06	2.53345994820885e-05	4.92834	Healthy-Active
ENSG00000110108.10	TMEM109	-0.826307	5.59315	-6.64021	1.55594591119691e-06	2.53755339391289e-05	5.00803	Healthy-Active
ENSG00000170955.10	CAVIN3	-1.93823	2.73324	-6.64017	1.55607407757548e-06	2.53755339391289e-05	5.30111	Healthy-Active
ENSG00000091428.18	RAPGEF4	-1.67073	1.82196	-6.63928	1.5590813671217e-06	2.54111299926271e-05	5.34375	Healthy-Active
ENSG00000109501.14	WFS1	-1.22355	4.03164	-6.63877	1.5607931291452e-06	2.54255840556999e-05	5.15257	Healthy-Active
ENSG00000091986.16	CCDC80	-2.29955	4.90062	-6.63811	1.56302817596712e-06	2.5448542742463e-05	5.08072	Healthy-Active
ENSG00000172469.16	MANEA	-0.744366	4.75097	-6.63661	1.56809080513109e-06	2.55174903405202e-05	5.07303	Healthy-Active
ENSG00000063176.16	SPHK2	0.852096	4.82122	6.6359	1.57050952192926e-06	2.55433635753994e-05	5.06682	Healthy-Active
ENSG00000214402.7	LCNL1	-4.76823	-1.59071	-6.63514	1.57306836265312e-06	2.55714873445843e-05	5.05446	Healthy-Active
ENSG00000164715.6	LMTK2	1.07584	6.42285	6.63485	1.57406267864522e-06	2.5574162265959e-05	4.92484	Healthy-Active
ENSG00000113615.13	SEC24A	-0.777266	5.73314	-6.63088	1.58761161386156e-06	2.57610715662723e-05	4.96743	Healthy-Active
ENSG00000204033.10	LRIT2	4.33868	0.427482	6.63061	1.58853827292293e-06	2.57610715662723e-05	5.3332	Healthy-Active
ENSG00000255398.3	HCAR3	-6.09406	-3.2909	-6.63058	1.58865687026333e-06	2.57610715662723e-05	4.73523	Healthy-Active
ENSG00000152583.13	SPARCL1	-1.59134	6.78227	-6.6305	1.58891006286246e-06	2.57610715662723e-05	4.89946	Healthy-Active
ENSG00000075234.17	TTC38	1.32243	6.84812	6.62831	1.59645055669479e-06	2.58617327381216e-05	4.88238	Healthy-Active
ENSG00000115738.10	ID2	1.04408	6.54742	6.62821	1.59679690472877e-06	2.58617327381216e-05	4.8999	Healthy-Active
ENSG00000211660.3	IGLV2-23	-2.05984	7.41233	-6.62642	1.60299999986112e-06	2.59485624977519e-05	4.83946	Healthy-Active
ENSG00000264522.6	OTUD7B	0.730612	5.5774	6.62516	1.60735241120006e-06	2.60053588795784e-05	4.97454	Healthy-Active
ENSG00000062598.18	ELMO2	-0.652761	4.49102	-6.62322	1.61412663657371e-06	2.60929612867805e-05	5.06907	Healthy-Active
ENSG00000225492.6	GBP1P1	-1.61463	0.641951	-6.62292	1.61515786452021e-06	2.60929612867805e-05	5.32788	Healthy-Active
ENSG00000139193.4	CD27	-1.79426	2.79367	-6.62288	1.61530677574307e-06	2.60929612867805e-05	5.24727	Healthy-Active
ENSG00000061337.15	LZTS1	-3.72491	-0.316544	-6.62263	1.61616345335952e-06	2.60931240419036e-05	5.28159	Healthy-Active
ENSG00000165487.14	MICU2	0.687514	5.99236	6.622	1.61836620795965e-06	2.61150077987039e-05	4.92815	Healthy-Active
ENSG00000197283.17	SYNGAP1	-1.16573	2.56054	-6.6198	1.62610402368916e-06	2.62261392538585e-05	5.26545	Healthy-Active
ENSG00000161638.11	ITGA5	-2.40633	4.78937	-6.61838	1.6310897084713e-06	2.62927907451852e-05	5.03739	Healthy-Active
ENSG00000128274.17	A4GALT	-1.96304	2.62488	-6.61617	1.6389029456955e-06	2.64049282223111e-05	5.25315	Healthy-Active
ENSG00000187231.14	SESTD1	-1.00237	4.42701	-6.6153	1.64200004329526e-06	2.64410048769087e-05	5.05439	Healthy-Active
ENSG00000136261.15	BZW2	0.716599	5.37065	6.6139	1.64696795362001e-06	2.65071536806905e-05	4.96336	Healthy-Active
ENSG00000173918.15	C1QTNF1	-1.44678	4.05137	-6.61277	1.65101335002301e-06	2.655839376882e-05	5.0959	Healthy-Active
ENSG00000103528.17	SYT17	1.57352	2.05755	6.61041	1.65944555815254e-06	2.66801103535834e-05	5.28352	Healthy-Active
ENSG00000256518.3	FOLR1P1	4.3529	-3.48712	6.6099	1.66126088244692e-06	2.66887966067095e-05	4.56907	Healthy-Active
ENSG00000232070.9	TMEM253	1.70812	1.24098	6.60978	1.66171768236837e-06	2.66887966067095e-05	5.30184	Healthy-Active
ENSG00000163600.13	ICOS	-2.73486	0.846407	-6.60822	1.66733555791784e-06	2.67650777242634e-05	5.29916	Healthy-Active
ENSG00000259953.2	AL138756.1	1.22804	3.39793	6.60734	1.67048844226885e-06	2.67930939037264e-05	5.14461	Healthy-Active
ENSG00000241755.1	IGKV1-9	-2.60694	6.62568	-6.60725	1.67081945695993e-06	2.67930939037264e-05	4.84817	Healthy-Active
ENSG00000143850.16	PLEKHA6	1.17001	7.1804	6.60669	1.67285954990373e-06	2.68106269935007e-05	4.80554	Healthy-Active
ENSG00000116685.16	KIAA2013	0.696818	6.86151	6.60647	1.67365258542861e-06	2.68106269935007e-05	4.83506	Healthy-Active
ENSG00000122420.10	PTGFR	-2.49134	2.31542	-6.60613	1.67487162619289e-06	2.68162173459174e-05	5.25864	Healthy-Active
ENSG00000133135.14	RNF128	1.11354	5.83174	6.60538	1.67758959081917e-06	2.68457885662708e-05	4.91501	Healthy-Active
ENSG00000162627.17	SNX7	0.750494	5.36805	6.60462	1.6803589457574e-06	2.68761510468027e-05	4.94134	Healthy-Active
ENSG00000146521.10	LINC01558	1.99629	1.4194	6.60339	1.68483078279664e-06	2.6933697902788e-05	5.28921	Healthy-Active
ENSG00000084652.16	TXLNA	-0.491412	6.1483	-6.60237	1.68854811951786e-06	2.69568958992402e-05	4.87616	Healthy-Active
ENSG00000155256.17	ZFYVE27	0.562542	5.99882	6.60235	1.6886390760605e-06	2.69568958992402e-05	4.88805	Healthy-Active
ENSG00000242515.5	UGT1A10	2.0996	4.42517	6.60228	1.68890581037062e-06	2.69568958992402e-05	5.03066	Healthy-Active
ENSG00000284428.1	AC092329.4	1.15363	1.62588	6.60122	1.69275665397782e-06	2.69926309619517e-05	5.2765	Healthy-Active
ENSG00000105376.5	ICAM5	-1.95037	0.0736035	-6.60119	1.69289626064867e-06	2.69926309619517e-05	5.23919	Healthy-Active
ENSG00000138600.10	SPPL2A	0.801124	7.25849	6.5979	1.70498132374076e-06	2.71712664834612e-05	4.7839	Healthy-Active
ENSG00000239862.1	IGKV1-37	-3.01803	-0.0181593	-6.59706	1.70806019092335e-06	2.72062651909295e-05	5.21209	Healthy-Active
ENSG00000081237.20	PTPRC	-2.03756	6.39775	-6.59675	1.70920717104642e-06	2.72104722204657e-05	4.8456	Healthy-Active
ENSG00000087237.12	CETP	-2.7635	-0.313442	-6.59644	1.71035931889288e-06	2.72147571335041e-05	5.22011	Healthy-Active
ENSG00000211637.2	IGLV4-69	-2.43399	4.55502	-6.59555	1.71367437733648e-06	2.72534354922021e-05	5.00382	Healthy-Active
ENSG00000166920.13	C15orf48	1.46698	6.7875	6.59442	1.71788544950715e-06	2.73063163688807e-05	4.80778	Healthy-Active
ENSG00000166816.15	LDHD	1.88162	5.62495	6.59322	1.72234036145956e-06	2.73630166394562e-05	4.89705	Healthy-Active
ENSG00000116667.15	C1orf21	0.8024	6.54696	6.59298	1.72323828707582e-06	2.7363177354953e-05	4.82655	Healthy-Active
ENSG00000123094.15	RASSF8	-1.89694	2.49985	-6.59004	1.73423557403371e-06	2.75236223621488e-05	5.21102	Healthy-Active
ENSG00000150630.4	VEGFC	-2.02777	0.92753	-6.58729	1.74457760174595e-06	2.76735081129243e-05	5.25489	Healthy-Active
ENSG00000188522.15	FAM83G	0.862285	5.32282	6.58699	1.74571983323561e-06	2.76773821914376e-05	4.90675	Healthy-Active
ENSG00000153898.13	MCOLN2	2.37874	4.59842	6.58668	1.7469196070947e-06	2.76821641183885e-05	4.97603	Healthy-Active
ENSG00000100014.20	SPECC1L	0.798952	5.48153	6.58594	1.74968885148475e-06	2.77117986082279e-05	4.89821	Healthy-Active
ENSG00000140374.16	ETFA	0.843592	7.52193	6.58534	1.75199639003633e-06	2.77340938558344e-05	4.73756	Healthy-Active
ENSG00000101842.14	VSIG1	-5.59757	-0.876332	-6.58409	1.75671977388141e-06	2.7794589399794e-05	5.12808	Healthy-Active
ENSG00000101460.13	MAP1LC3A	0.790313	4.66107	6.58193	1.76498586815383e-06	2.79110464044994e-05	4.96859	Healthy-Active
ENSG00000259207.9	ITGB3	-1.71587	3.00362	-6.58016	1.77176560673027e-06	2.80038911615557e-05	5.13685	Healthy-Active
ENSG00000162804.14	SNED1	-1.46441	3.93648	-6.57712	1.78348064099224e-06	2.81746062716667e-05	5.04086	Healthy-Active
ENSG00000102226.10	USP11	-0.749086	4.95703	-6.57667	1.78519163253002e-06	2.81828693814681e-05	4.92519	Healthy-Active
ENSG00000010438.17	PRSS3	1.1462	6.20142	6.57651	1.78583251361108e-06	2.81828693814681e-05	4.80809	Healthy-Active
ENSG00000134030.14	CTIF	-1.07725	1.75875	-6.57523	1.79079975653984e-06	2.8246795955125e-05	5.21372	Healthy-Active
ENSG00000174004.6	NRROS	-1.66845	2.05431	-6.57499	1.79173005887126e-06	2.824701388464e-05	5.19678	Healthy-Active
ENSG00000113805.8	CNTN3	3.51063	2.81833	6.57396	1.79572901974613e-06	2.82955849271961e-05	5.11769	Healthy-Active
ENSG00000167207.14	NOD2	-1.88712	1.74925	-6.57342	1.79781192358076e-06	2.83139301464908e-05	5.20867	Healthy-Active
ENSG00000158089.15	GALNT14	-4.369	-2.64453	-6.57129	1.80614337398492e-06	2.84306153879414e-05	4.75149	Healthy-Active
ENSG00000182195.9	LDOC1	-1.69021	1.09504	-6.57081	1.80802741486083e-06	2.84408019386781e-05	5.22189	Healthy-Active
ENSG00000230006.7	ANKRD36BP2	-1.59544	5.37256	-6.57058	1.80893265037696e-06	2.84408019386781e-05	4.88279	Healthy-Active
ENSG00000130958.13	SLC35D2	0.97139	4.42111	6.57042	1.80955882683066e-06	2.84408019386781e-05	4.9537	Healthy-Active
ENSG00000255468.7	AP001107.9	1.23591	3.08568	6.56913	1.81463717250928e-06	2.85060816992398e-05	5.09705	Healthy-Active
ENSG00000137965.11	IFI44	-1.51629	3.01676	-6.56889	1.81556991952501e-06	2.85062050380439e-05	5.08654	Healthy-Active
ENSG00000035862.12	TIMP2	-1.56632	6.69382	-6.5678	1.81986068425028e-06	2.85590255342556e-05	4.77708	Healthy-Active
ENSG00000114446.5	IFT57	0.795571	5.39377	6.56709	1.82267421714783e-06	2.85886219067243e-05	4.86395	Healthy-Active
ENSG00000259459.6	LINC02568	2.38587	2.07237	6.5652	1.83015757901061e-06	2.86913971224241e-05	5.16983	Healthy-Active
ENSG00000153551.14	CMTM7	-1.61156	2.68791	-6.56459	1.83256467057491e-06	2.871108660781e-05	5.13218	Healthy-Active
ENSG00000181817.6	LSM10	-0.885309	3.64393	-6.56441	1.83327661153661e-06	2.871108660781e-05	5.03065	Healthy-Active
ENSG00000188042.8	ARL4C	-1.58233	4.33379	-6.564	1.83491995086255e-06	2.87222284436437e-05	4.95063	Healthy-Active
ENSG00000075240.17	GRAMD4	0.923565	6.8205	6.56316	1.8382630784075e-06	2.87599524566485e-05	4.73874	Healthy-Active
ENSG00000081026.19	MAGI3	0.993842	5.80284	6.56232	1.84161344542341e-06	2.87855112979912e-05	4.80791	Healthy-Active
ENSG00000115415.20	STAT1	-1.18301	7.09984	-6.56228	1.84176465006452e-06	2.87855112979912e-05	4.70322	Healthy-Active
ENSG00000147689.16	FAM83A	-4.77773	-1.54149	-6.55978	1.85180128679342e-06	2.89277077852306e-05	5.03507	Healthy-Active
ENSG00000138443.17	ABI2	-0.688717	4.68524	-6.55917	1.85426063502137e-06	2.89514523971598e-05	4.90935	Healthy-Active
ENSG00000167157.11	PRRX2	-2.41211	0.239736	-6.55707	1.86272635877566e-06	2.90689058753543e-05	5.17241	Healthy-Active
ENSG00000262050.1	AC005696.1	2.09014	-0.504151	6.55526	1.87003256787338e-06	2.91681547441424e-05	5.10413	Healthy-Active
ENSG00000122126.17	OCRL	0.764392	5.67227	6.5544	1.87354197422984e-06	2.92081118804946e-05	4.80922	Healthy-Active
ENSG00000139722.7	VPS37B	0.822044	5.9571	6.55302	1.87914511628572e-06	2.92708193918963e-05	4.78024	Healthy-Active
ENSG00000065413.20	ANKRD44	-1.40746	4.42935	-6.55294	1.87946372851506e-06	2.92708193918963e-05	4.92242	Healthy-Active
ENSG00000130956.14	HABP4	-1.35754	2.47769	-6.55271	1.88041792492967e-06	2.92708893253826e-05	5.12664	Healthy-Active
ENSG00000123338.13	NCKAP1L	-1.45522	5.23349	-6.55167	1.88466823110692e-06	2.93222410655964e-05	4.84113	Healthy-Active
ENSG00000169071.15	ROR2	-1.42297	2.69365	-6.5513	1.88619964368771e-06	2.93312609576685e-05	5.09328	Healthy-Active
ENSG00000205038.12	PKHD1L1	-1.53123	2.57634	-6.55077	1.88836802519786e-06	2.9350171913577e-05	5.12204	Healthy-Active
ENSG00000168101.14	NUDT16L1	0.615979	5.06715	6.55037	1.89000616415447e-06	2.93608266055469e-05	4.85304	Healthy-Active
ENSG00000183723.13	CMTM4	1.55501	7.43631	6.54983	1.89219616448735e-06	2.93800392874885e-05	4.66278	Healthy-Active
ENSG00000165410.15	CFL2	-1.09162	3.68879	-6.54811	1.89929673240201e-06	2.94754403773225e-05	4.99792	Healthy-Active
ENSG00000110651.12	CD81	-0.950396	7.00636	-6.54682	1.90462347643918e-06	2.95432310857232e-05	4.69831	Healthy-Active
ENSG00000212978.6	AC016747.1	-1.61908	0.465505	-6.5444	1.91463664834111e-06	2.96836097276265e-05	5.15661	Healthy-Active
ENSG00000137507.11	LRRC32	-1.85031	3.96591	-6.54381	1.91711844904345e-06	2.97071431462886e-05	4.94878	Healthy-Active
ENSG00000196660.11	SLC30A10	3.54675	4.88977	6.54037	1.93148104337257e-06	2.99146619285357e-05	4.83172	Healthy-Active
ENSG00000182938.7	OTOP3	4.69072	-0.554151	6.54008	1.93271229859636e-06	2.99186970140826e-05	5.05848	Healthy-Active
ENSG00000225663.8	MCRIP1	-0.899854	3.63038	-6.53937	1.93568334638526e-06	2.99496467966567e-05	4.9793	Healthy-Active
ENSG00000163328.14	GPR155	-1.01365	4.06865	-6.53707	1.94536605668205e-06	3.00843588725527e-05	4.92445	Healthy-Active
ENSG00000198369.10	SPRED2	0.670543	5.73576	6.53657	1.94748872239968e-06	3.01020812001407e-05	4.7667	Healthy-Active
ENSG00000148660.21	CAMK2G	0.6792	6.11489	6.53604	1.94973539506142e-06	3.01082315086368e-05	4.73727	Healthy-Active
ENSG00000131368.8	MRPS25	0.772014	5.65733	6.53601	1.94984037154015e-06	3.01082315086368e-05	4.76859	Healthy-Active
ENSG00000172270.22	BSG	1.14765	9.53037	6.53472	1.95531873791338e-06	3.01777059695684e-05	4.51797	Healthy-Active
ENSG00000277200.1	AC005696.4	2.18902	0.24632	6.53339	1.96100021779432e-06	3.02502441004199e-05	5.1332	Healthy-Active
ENSG00000068028.17	RASSF1	-0.78617	4.73941	-6.53175	1.96798727828708e-06	3.03327262326325e-05	4.84326	Healthy-Active
[truncated: 28,822 more rows]
