# Supplementary material for: PGLYRP-1 mediated intracellular peptidoglycan detection promotes mucosal protection
Source: Research Square preprint supplement (doi:10.21203/rs.3.rs-5118704/v1), 2024-10-14
Supplement: Supplementary file 6 [file 4fe1925117a02ae31eab3413.docx]

**Key resources table**

| REAGENT or RESOURCE | SOURCE | IDENTIFIER |
| --- | --- | --- |
| Antibodies | | | |
| Goat anti-mouse Pgylrp1 | R&D system, Minneapolis, MN | AF2696 |
| Rabbit anti-mouse Pgylrp1 | Cell signaling, Danvers, MA | 36302 |
| Sheep anti mouse GEFH1 | Exalpha Biologicals, Shirley, MA | X1089 |
| Rabbit anti-GEFH1 | Abcam, Waltham, MA | ab155785 |
| Mouse anti-Nod2(2D9) | Santa cruz biotech, Dallas, TX | sc-56168 |
| Rabbit anti-Nod2 | Invitrogen, Carlsbad, CA | PA5-104317 |
| Mouse anti-GM130 | BD biosciences, Franklin Lakes, NJ | 610822 |
| Rabbit anti-Sec61b(D5Q1W) | Cell signaling, Danvers, MA | 14648 |
| RB anti-GAPDH | Cell signaling, Danvers, MA | 92310 |
| Mouse anti-β-Actin (8H10D10) | Cell signaling, Danvers, MA | 3700s |
| RB anti-phospho-stat1(Tyr701) (58D6) | Cell signaling, Danvers, MA | 9197 |
| RB anti-stat1 | Cell signaling, Danvers, MA | 9172s |
| Anti-rabbit-Ig G-HRP | Cell signaling, Danvers, MA | 7074 |
| Anti-mouse-Ig G-HRP | Cell signaling, Danvers, MA | 7078 |
| Anti-sheep-Ig G-HRP | Invitrogen, Carlsbad, CA | A16041 |
| Anti-goat-Ig G-HRP | Santa Cruz biotech., Dallas, TX | SC-2354 |
| Anti-PGLYRP1 | R&D Systems, Minneapolis, MN | MAB2590 |
| Anti-PGLYRP3 | Novus Biologicals, Centennial CO, CO | NB100-56729SS |
| Anti-PGLYRP4 | Novus Biologicals, Centennial CO, CO | NB100-56721SS |
| Cy3 goat anti-mouse IgG | Invitrogen, Carlsbad, CA | A10521 |
| Cy3 anti-human IgG | Jackson ImmunoResearch Lab, West Grove, PA | 109-165-170 |
| Anti-MDP 2E7 | https://www.nature.com/articles/s41564-019-0381-1 | N/A |
| Anti-F4/80 | Cell Signaling Technologies, Danvers, MA | 70076 |
| Anti-CD68 | Cell Signaling Technologies, Danvers, MA |  |
| Anti-Goat IgG AF488 | Invitrogen, Carlsbad, CA | A32814TR |
| Anti-Rabbit IgG AF594 | Life Technologies, Carlsbad, CA | A11037 |
|  |  |  |
| Bacterial and virus strains | | | |
| One shot Top 10 Competent E. Coli | Invitrogen, Carlsbad, CA | C404003 |
|  |  |  |
|  |  |  |
|  |  |  |
|  |  |  |
| Biological samples |  |  |
|  |  |  |
|  |  |  |
| Chemicals, peptides, and recombinant proteins | | | |
| m-CSF | biolend | 576404 |
| IFN gamma | biolend | 575304 |
| IFN beta1 | biolend | 581302 |
| c-di-GMP | Invivogen | Tlrl-nacdg |
| MDP | Invivogen | Tlrl-mdp |
| GMTP | from Grimes lab |  |
| FBS | Gibco | 26140-079, 500ML |
| Penicillin/ streptomycin | Sigma-Aldrich | P4458-100ML |
| RPMI-1640 | Sigma | RO883-500ML |
| DMEM/high glucose | Cytiva (Hyclone) | SH30243-01 |
| ACK lysis buffer | Gibco | A10492-01 100ML |
| 0.25% trypsin | Gibco | 25200-056 100ML |
| 70 um cell strainers | Falcon | 352350 |
| 10 cm Petri dish | Fisherbrand | FB0875713 |
| 15 ml tube | Falcon | 352097 |
| 50 ml tube | Falcon | 352098 |
| 1.5mL microcentrifuge tube | Eppendorf | 022363204 |
| 384-well PCR plates | Bio-Rad | HSP3805 |
| PCR film | Eppendorf | 0030127781 |
| PCR 8-tube strips | USA scientific | 21102 |
| 6-well plate | Corning Incorporated | 3506 |
| 10-cm culture dish | Corning | 430167 |
| PBS (tablet) | Millipore Sigma | 524650-1EA |
| Pierce RIPA buffer | Thermo Scientific | 89900 |
| protease and phosphatase single-use inhibitor cocktail | Thermo Scientific | 78430 |
| Tween 20 (CAS: 9005-64-5) | Fisher | BP337-500 |
| 10X Tris/glycine buffer | Bio-Rad | 1610771 |
| 10X Tris/glycine/SDS buffer | Bio-Rad | 1610772 |
| Methanol (CAS: 67-56-1) | Sigma-Aldrich | 179337-500ML |
| 8-16% Tris-Glycine Gel | Invitrogen, Carlsbad, CA | XP08162BOX |
| 4-12% Tris-Glycine Gel | Invitrogen, Carlsbad, CA | NW04122BOX |
| Immobilon western chemiluminescent HRP substrate | Millipore | WBKLS0100 |
| Pierce IP lysis buffer | Thermo Scientific | 87787 |
| Pierce Protein A/G plus agarose | Thermo Scientific | 20423 |
| Bio-Rad XT sample buffer X4 | Bio-Rad | 1610791 |
| 10% SDS | Invitrogen | 15553-035 100ML |
| 50X TAE buffer | Invitrogen | 24710-030 1000ML |
| Luria agar | Research Product International | L24020-500 |
| Luria broth | Research Product International | L24040-1000 |
| UltraPure Agarose | Invitrogen, Carlsbad, CA | 16500-500 |
| Coomassie brilliant blue r-250 | Bio-Rad | 1610436 |
| Recombinant Human PGLYRP1/PGRP-S | R&D Systems | 2590-PGB-050 |
| Recombinant Human PGLYRP3/PGRP-I alpha | R&D Systems | 8507-PG-050 |
| Recombinant Human PGLYRP4/PGRP-I beta | R&D Systems | 8389-PG-050 |
| Prolong gold antifade Mountant with DAPI | Invitrogen, Carlsbad, CA | P36931 |
| Normal Donkey Serum | Jackson Immuno Research Lab | NC9624464 |
| Picrylsulfonic acid solution | Sigma-Aldrich | P2297 |
| Critical commercial assays | | | |
| RNeasy plus mini RNA kit | Qiagen | 74134 |
| QuantiTect Reverse Transcription kit | Qiagen | 205311 |
| Qiaquick gel extraction kit | Qiagen | 28704 |
| Endofree plasmid maxi kit | Qiagen | 12362 |
| PowerTrack sybr green master mix | Applied biosystems | A46109 |
| Primescript RT reagent kit | TaKaRa | RR037a |
| Pierce BCA protein assay kit | Thermo scientific | 23227 |
| Deposited data | | | |
|  |  |  |
|  |  |  |
|  |  |  |
| Experimental models: Cell lines | | | |
| 293T | ATCC | CRL-3216 |
| Experimental models: Organisms/strains | | | |
| PGLYRP1-/- mice | The Jackson Laboratory | 015861 |
| NOD2-/- mice | The Jackson Laboratory | 005763 |
| GEF-H1-/- mice | https://www.ncbi.nlm.nih.gov/pmc/articles/PMC4066330/ | n/a |
| C57BL/6 | The Jackson Laboratory | 000664 |
| Oligonucleotides | | | |
| NOD2-F | CCC TAC AGC TGG ATT ACA ACT C | n/a |
| NOD2-R | GCA CCT CGG TCT GAG ATA TTG | n/a |
| Pglyrp1-f | GAG GAC GGT CAT GTC TAT GAA G | n/a |
| Pglyrp1-r | CCA TGA AGG TGA TGC CAA TAG A | n/a |
| CXCL1-f | GCT GGG ATT CAC CTC AAG AA | n/a |
| CXCL1-r | TGG CTA TGA CTT CGG TTT GG | n/a |
| CXCL2-F | GTG AAC TGC GCT GTC AAT G | n/a |
| CXCL2-R | GTG GCT ATG ACT TCT GTC TGG | n/a |
| CXCL3-f | CAC CCT ACC AAG GGT TGA TTT | n/a |
| CXCL3-r | CAT CCT TGA GAG TGG CTA TGA | n/a |
| CXCL9-f | CAA ATC CCT CAA AGA CCT CAA AC | n/a |
| CXCL9-r | CCC ATT CTT TCA TCA GCT TCT TC | n/a |
| CXCL10-f | GCT GCA ACT GCA TCC ATA TC | n/a |
| CXCL10-r | CGT GGC AAT GAT CTC AAC AC | n/a |
| IL6-f | CTT CAC AAG TCG GAG GCT TAA T | n/a |
| IL6-r | ACT CCA GGT AGC TAT GGT ACT | n/a |
| SG15-f | GAA GCA GAT TGC CCA GAA GA | n/a |
| ISG15-r | CTA CAG TCT GCG TCA GAA AGA C | n/a |
| zbp1-f | GGA ATG ACG ACA GCC AAA GA | n/a |
| zbp1-r | TTC CTG ACG TGA GTG GTA GA | n/a |
| Socs3-f | ACC TTT CTT ATC CGC GAC AG | n/a |
| Socs3-r | CAC TGG ATG CGT AGG TTC TT | n/a |
| IFN gamma-f | CTC TTC CTC ATG GCT GTT TCT | n/a |
| IFN gamma-r | TTC TTC CAC ATC TAT GCC ACT T | n/a |
| IFN beta-f | GAT GAC GGA GAA GAT GCA GAA G | n/a |
| IFN beta-r | ACC CAG TGC TGG AGA AAT TG | n/a |
| TNF alpha-f | AGA CCC TCA CAC TCA GAT CA | n/a |
| TNF alpha-r | AAG AGA ACC TGG GAG TAG ACA | n/a |
| Ptgs2-F | GGC CAT GGA GTG GAC TTA AA | n/a |
| Ptgs2-R | GAT ACA CCT CTC CAC CAA TGA C | n/a |
| tNFSF15-F | CAC CAA GAA CGG GAT GAA GTA | n/a |
| tNFSF15-R | GGA ATG TGA TCT GGG AGT AGA TG | n/a |
| GAPDH -F | GGA GAA ACC TGC CAA GTA TGA | n/a |
| GAPDH -R | CCT GTT GCT GTA GCC GTA TT | n/a |
| IL1a-F | GAA GAA GAG ACG GCT GAG TTT | n/a |
| IL1a-R | TCA CTC TGG TAG GTG TAA GGT | n/a |
| IL1b-F | GAG GAC ATG AGC ACC TTC TTT | n/a |
| IL1b-R | GCC TGT AGT GCA GTT GTC TAA | n/a |
| IL12b-F | GGA CCA AAG GGA CTA TGA GAA G | n/a |
| IL12b-R | GAA GAA GCT GGT GCT GTA GT | n/a |
| IL12a-F | GAC CAA ACC AGC ACA TTG AAG | n/a |
| IL12a-R | CTC CCT CTT GTT GTG GAA GAA | n/a |
| Acod1-f | GGT GAG AGA GTT GCT CAA GAA G | n/a |
| Acod1-r | CGA ATG AGG ACA TGC TGG ATA G | n/a |
| Clec4e-f | CAA ATT TCC GGG CAG AAC TTA C | n/a |
| Clec4e-r | CTC TTC CTG TGT GTC GAT AAC C | n/a |
|  |  |  |
|  |  |  |
| Recombinant DNA | | | |
|  |  |  |
|  |  |  |
|  |  |  |
|  |  |  |
|  |  |  |
|  |  |  |
| Software and algorithms | | | |
| Excel | Microsoft Office | N/A |
| GenePix Pro 7 | Molecular Devices | N/A |
| GraphPad Prism 9 | GraphPad | N/A |
| MestReNova Software | Mestrelab Research S.L. | N/A |
|  |  |  |
|  |  |  |
|  |  |  |
| Other | | |
| Slides, Nexterion Slide H | Schott Minifab | N/A |
| 16 Well Slide Module (Multi-Array Slide System) | Grace Bio-Labs | 206862 |
| Stainless Steel Spring Clips | Grace Bio-Labs | 204838 |
| MicroAmpTM Optical Adhesive Film | Applied Biosystems | 4311971 |
| FoilSealTM | Excel Scientific | XTRFOIL100 |
