# Supplementary material for: PGLYRP-1 mediated intracellular peptidoglycan detection promotes mucosal protection
Source: Research Square preprint supplement (doi:10.21203/rs.3.rs-5118704/v1), 2024-10-14
Supplement: Supplementary file 7 [file 516d99bc1cc6e6a5d094c5c2.xlsx]

## Sheet: Sheet1
GeneID	GeneSymbol	logFC	AveExpr	t	P.Value	adj.P.Val	B	Contrast
ENSMUSG00000024164.15	C3	-1.49996	9.02234	-17.5902	3.89781123037406e-10	8.69718619833365e-06	13.3158	PG1_0-PG1_GMTP
ENSMUSG00000076441.9	Ass1	-1.2055	5.94124	-15.8979	1.29901275322789e-09	1.10959953609762e-05	12.1657	PG1_0-PG1_GMTP
ENSMUSG00000039899.5	Fgl2	-1.00195	7.64351	-15.3527	1.96310898193895e-09	1.10959953609762e-05	11.9038	PG1_0-PG1_GMTP
ENSMUSG00000040026.8	Saa3	-1.14959	5.4037	-15.0652	2.45396697078764e-09	1.10959953609762e-05	11.576	PG1_0-PG1_GMTP
ENSMUSG00000075602.10	Ly6a	-1.1631	4.07878	-14.9807	2.62226028829581e-09	1.10959953609762e-05	11.2505	PG1_0-PG1_GMTP
ENSMUSG00000026548.4	Slamf9	-0.667194	6.27603	-14.8173	2.98373020955752e-09	1.10959953609762e-05	11.4798	PG1_0-PG1_GMTP
ENSMUSG00000000386.16	Mx1	-0.982673	5.70478	-14.5869	3.58796930230154e-09	1.14369084346077e-05	11.2799	PG1_0-PG1_GMTP
ENSMUSG00000000957.11	Mmp14	-1.0567	6.32816	-14.033	5.65043680916602e-09	1.57597745653652e-05	10.9227	PG1_0-PG1_GMTP
ENSMUSG00000025498.15	Irf7	-0.873017	8.77935	-13.7464	7.19250000804076e-09	1.78318058532682e-05	10.7689	PG1_0-PG1_GMTP
ENSMUSG00000028037.13	Ifi44	-1.21247	6.32089	-13.554	8.47834792709187e-09	1.89177377297201e-05	10.5611	PG1_0-PG1_GMTP
ENSMUSG00000016283.13	H2-M2	-0.998418	5.87325	-13.4039	9.65369579322917e-09	1.95820831122111e-05	10.4225	PG1_0-PG1_GMTP
ENSMUSG00000024675.19	Ms4a4c	-1.33545	6.41231	-13.2566	1.09786318691366e-08	2.04138510746704e-05	10.3328	PG1_0-PG1_GMTP
ENSMUSG00000062488.9	Ifit3b	-0.977225	5.58084	-12.9059	1.49883590693391e-08	2.57257889164741e-05	10.0114	PG1_0-PG1_GMTP
ENSMUSG00000035042.2	Ccl5	-0.941448	7.52066	-12.7968	1.65368695555439e-08	2.63562264566322e-05	9.98976	PG1_0-PG1_GMTP
ENSMUSG00000021322.8	Aoah	-0.650577	6.74166	-12.406	2.36635572116839e-08	3.52003301376202e-05	9.64283	PG1_0-PG1_GMTP
ENSMUSG00000078763.2	Slfn1	-1.29151	5.23489	-12.2398	2.76432215181295e-08	3.63642982565123e-05	9.43711	PG1_0-PG1_GMTP
ENSMUSG00000074896.3	Ifit3	-0.957979	7.98333	-12.2374	2.77055111531712e-08	3.63642982565123e-05	9.51835	PG1_0-PG1_GMTP
ENSMUSG00000075010.5	AW112010	-0.941315	5.03862	-12.0913	3.18078411960474e-08	3.93525964547387e-05	9.2957	PG1_0-PG1_GMTP
ENSMUSG00000031304.18	Il2rg	-0.626195	6.1832	-12.0366	3.35095833209356e-08	3.93525964547387e-05	9.30609	PG1_0-PG1_GMTP
ENSMUSG00000003617.16	Cp	-0.938551	3.53847	-11.72	4.54777138818763e-08	4.87815840972861e-05	8.73084	PG1_0-PG1_GMTP
ENSMUSG00000060550.16	H2-Q7	-1.06086	5.39641	-11.7103	4.59110503313319e-08	4.87815840972861e-05	8.9845	PG1_0-PG1_GMTP
ENSMUSG00000022587.14	Ly6e	-0.586163	10.0819	-11.5322	5.46945666913712e-08	5.44390253595875e-05	8.88778	PG1_0-PG1_GMTP
ENSMUSG00000031722.10	Hp	-1.0935	3.10504	-11.5063	5.61151608152428e-08	5.44390253595875e-05	8.40806	PG1_0-PG1_GMTP
ENSMUSG00000030107.10	Usp18	-0.847712	5.62035	-11.3209	6.75127526445084e-08	6.13693121721931e-05	8.63795	PG1_0-PG1_GMTP
ENSMUSG00000028270.12	Gbp2	-0.823536	7.64735	-11.2893	6.96949824104914e-08	6.13693121721931e-05	8.64737	PG1_0-PG1_GMTP
ENSMUSG00000032661.9	Oas3	-0.766632	8.99753	-11.2638	7.15099769854802e-08	6.13693121721931e-05	8.63093	PG1_0-PG1_GMTP
ENSMUSG00000041827.15	Oasl1	-0.949219	4.89285	-11.1182	8.28950172850153e-08	6.85050563215017e-05	8.41193	PG1_0-PG1_GMTP
ENSMUSG00000054072.12	Iigp1	-1.10126	4.02402	-10.934	1.00155483895148e-07	7.98131897197298e-05	8.14867	PG1_0-PG1_GMTP
ENSMUSG00000032193.9	Ldlr	-0.665693	6.59665	-10.8464	1.09683585936754e-07	8.43920638967861e-05	8.20511	PG1_0-PG1_GMTP
ENSMUSG00000009585.18	Apobec3	-0.538239	5.79928	-10.6293	1.37749171049368e-07	9.66602216799648e-05	7.97495	PG1_0-PG1_GMTP
ENSMUSG00000015947.10	Fcgr1	-0.51921	9.2285	-10.6072	1.41008423862915e-07	9.66602216799648e-05	7.98109	PG1_0-PG1_GMTP
ENSMUSG00000037997.12	Parp11	-0.544996	5.26051	-10.5948	1.42874366181023e-07	9.66602216799648e-05	7.92475	PG1_0-PG1_GMTP
ENSMUSG00000039942.15	Ptger4	-0.585615	5.25954	-10.5943	1.42956452087968e-07	9.66602216799648e-05	7.92418	PG1_0-PG1_GMTP
ENSMUSG00000023367.14	Tmem176a	-0.776864	5.14934	-10.4565	1.65596637521124e-07	0.000108675	7.78215	PG1_0-PG1_GMTP
ENSMUSG00000027514.14	Zbp1	-1.01391	6.49587	-10.3942	1.77074440506155e-07	0.000112887	7.74785	PG1_0-PG1_GMTP
ENSMUSG00000029810.15	Tmem176b	-0.660724	6.55101	-10.1752	2.24679015056678e-07	0.000139257	7.52046	PG1_0-PG1_GMTP
ENSMUSG00000029009.17	Mthfr	-0.608981	6.80048	-10.1457	2.32069053593113e-07	0.00013995	7.49145	PG1_0-PG1_GMTP
ENSMUSG00000091649.3	Phf11b	-0.731516	6.03401	-10.0844	2.48282709540728e-07	0.000141926	7.41908	PG1_0-PG1_GMTP
ENSMUSG00000029366.10	Dck	-0.603206	7.09448	-10.0822	2.48887637139236e-07	0.000141926	7.42597	PG1_0-PG1_GMTP
ENSMUSG00000066861.14	Oas1g	-0.655085	5.47877	-10.0623	2.54426950562776e-07	0.000141926	7.38628	PG1_0-PG1_GMTP
ENSMUSG00000078921.3	Tgtp2	-1.06793	4.65966	-9.92652	2.95895649272292e-07	0.000161032	7.21587	PG1_0-PG1_GMTP
ENSMUSG00000022014.15	Epsti1	-0.503014	6.92021	-9.7804	3.48756109122239e-07	0.000183698	7.09916	PG1_0-PG1_GMTP
ENSMUSG00000040033.16	Stat2	-0.699822	8.09386	-9.75479	3.59024090249088e-07	0.000183698	7.07405	PG1_0-PG1_GMTP
ENSMUSG00000045932.12	Ifit2	-0.993715	9.30263	-9.74692	3.6224260784507e-07	0.000183698	7.06626	PG1_0-PG1_GMTP
ENSMUSG00000017830.15	Dhx58	-0.592389	6.79796	-9.7052	3.79830783060624e-07	0.00018585	7.01599	PG1_0-PG1_GMTP
ENSMUSG00000078920.3	Ifi47	-0.791234	6.43011	-9.68039	3.90722975967792e-07	0.00018585	6.98676	PG1_0-PG1_GMTP
ENSMUSG00000027078.14	Ube2l6	-0.669605	6.90939	-9.67871	3.91474252690071e-07	0.00018585	6.98719	PG1_0-PG1_GMTP
ENSMUSG00000073409.12	H2-Q6	-1.03068	5.34687	-9.60343	4.26692885179513e-07	0.000194756	6.89065	PG1_0-PG1_GMTP
ENSMUSG00000052776.10	Oas1a	-0.502758	7.26343	-9.60139	4.2769027328642e-07	0.000194756	6.90231	PG1_0-PG1_GMTP
ENSMUSG00000044703.5	Phf11a	-0.845126	3.57776	-9.5772	4.3974630007189e-07	0.000196241	6.74935	PG1_0-PG1_GMTP
ENSMUSG00000056116.18	H2-T22	-0.526443	7.76908	-9.5222	4.68535153858161e-07	0.000204989	6.81424	PG1_0-PG1_GMTP
ENSMUSG00000024677.13	Ms4a6b	-0.604723	7.54177	-9.47748	4.93428199600016e-07	0.000211728	6.76351	PG1_0-PG1_GMTP
ENSMUSG00000070034.13	Sp110	-0.47961	6.45273	-9.41169	5.3266046744785e-07	0.00022425	6.68676	PG1_0-PG1_GMTP
ENSMUSG00000082292.3	Gm12250	-0.713088	5.34492	-9.35442	5.69533232994075e-07	0.000235333	6.61381	PG1_0-PG1_GMTP
ENSMUSG00000026222.16	Sp100	-0.490541	7.81796	-9.33674	5.81458880436461e-07	0.000235893	6.60329	PG1_0-PG1_GMTP
ENSMUSG00000062960.10	Kdr	-0.710942	5.86662	-9.30207	6.05636363573003e-07	0.000238473	6.55951	PG1_0-PG1_GMTP
ENSMUSG00000053835.17	H2-T24	-0.632934	7.12873	-9.29709	6.09193971292701e-07	0.000238473	6.55746	PG1_0-PG1_GMTP
ENSMUSG00000079419.4	Ms4a6c	-0.478711	7.5752	-9.27995	6.21617392594759e-07	0.000238952	6.53793	PG1_0-PG1_GMTP
ENSMUSG00000024397.14	Aif1	-0.501066	7.03152	-9.26613	6.31835897896265e-07	0.000238952	6.52176	PG1_0-PG1_GMTP
ENSMUSG00000020638.8	Cmpk2	-0.673137	7.67576	-9.23079	6.58781032132717e-07	0.000243137	6.48108	PG1_0-PG1_GMTP
ENSMUSG00000050395.9	Tnfsf15	-0.853193	2.77031	-9.22324	6.64696007975179e-07	0.000243137	6.21621	PG1_0-PG1_GMTP
ENSMUSG00000036381.13	P2ry14	-0.488651	6.0964	-9.20406	6.79978799024108e-07	0.000244716	6.44842	PG1_0-PG1_GMTP
ENSMUSG00000029561.17	Oasl2	-0.606174	8.548	-9.1864	6.94386500231107e-07	0.000245934	6.42907	PG1_0-PG1_GMTP
ENSMUSG00000021591.8	Glrx	-0.47572	5.73424	-9.16551	7.11841990621585e-07	0.000247683	6.40232	PG1_0-PG1_GMTP
ENSMUSG00000035692.7	Isg15	-0.944378	6.17565	-9.15416	7.21525902986654e-07	0.000247683	6.39104	PG1_0-PG1_GMTP
ENSMUSG00000040296.15	Ddx58	-0.652783	7.40725	-9.09032	7.78692756078845e-07	0.000263257	6.31734	PG1_0-PG1_GMTP
ENSMUSG00000079339.7	Ifit1bl1	-0.877595	5.50357	-9.01965	8.47666407139281e-07	0.000282298	6.23183	PG1_0-PG1_GMTP
ENSMUSG00000026104.14	Stat1	-0.474136	6.2195	-8.97763	8.9175658425622e-07	0.000292614	6.18485	PG1_0-PG1_GMTP
ENSMUSG00000026536.9	Ifi211	-0.656899	7.22937	-8.94027	9.33021715590581e-07	0.000301718	6.14016	PG1_0-PG1_GMTP
ENSMUSG00000073489.6	Ifi204	-0.507656	8.47493	-8.90734	9.71084122635983e-07	0.00030954	6.09909	PG1_0-PG1_GMTP
ENSMUSG00000066152.11	Slc31a2	-0.470765	7.03457	-8.89511	9.85645686241457e-07	0.000309757	6.08656	PG1_0-PG1_GMTP
ENSMUSG00000073555.1	Gm4951	-0.750431	3.57672	-8.87218	1.01356176815915e-06	0.000313793	5.98681	PG1_0-PG1_GMTP
ENSMUSG00000028459.11	Cd72	-0.477538	9.54059	-8.86169	1.02661565340944e-06	0.000313793	6.04323	PG1_0-PG1_GMTP
ENSMUSG00000025279.7	Dnase1l3	-0.948473	1.46981	-8.7438	1.18636275528064e-06	0.000349321	5.26815	PG1_0-PG1_GMTP
ENSMUSG00000022586.11	Ly6i	-2.77584	0.704965	-8.73596	1.19789173200695e-06	0.000349321	4.84468	PG1_0-PG1_GMTP
ENSMUSG00000034459.8	Ifit1	-0.866829	6.64997	-8.73214	1.20355500069457e-06	0.000349321	5.89119	PG1_0-PG1_GMTP
ENSMUSG00000094796.2	BC147527	-0.915364	2.57945	-8.73085	1.20547260998948e-06	0.000349321	5.65174	PG1_0-PG1_GMTP
ENSMUSG00000022906.15	Parp9	-0.482826	7.16714	-8.61472	1.39224456890795e-06	0.000398271	5.74664	PG1_0-PG1_GMTP
ENSMUSG00000066677.12	Ifi208	-1.18148	4.00696	-8.57741	1.4586430948546e-06	0.000411984	5.68015	PG1_0-PG1_GMTP
ENSMUSG00000037321.17	Tap1	-0.520224	7.58643	-8.53125	1.5454878026158e-06	0.000431056	5.6423	PG1_0-PG1_GMTP
ENSMUSG00000069874.7	Irgm2	-0.558166	6.68985	-8.49653	1.6144540337113e-06	0.000444732	5.60233	PG1_0-PG1_GMTP
ENSMUSG00000029484.12	Anxa3	0.417458	6.91601	8.42001	1.77832193821234e-06	0.00047973	5.50615	PG1_0-PG1_GMTP
ENSMUSG00000079017.3	Ifi27l2a	-0.448295	6.50302	-8.40691	1.80812021700173e-06	0.00047973	5.49149	PG1_0-PG1_GMTP
ENSMUSG00000046879.7	Irgm1	-0.545122	7.65827	-8.40683	1.80829729196128e-06	0.00047973	5.48674	PG1_0-PG1_GMTP
ENSMUSG00000060519.11	Tor3a	-0.525824	8.11802	-8.39851	1.82750235160785e-06	0.00047973	5.47476	PG1_0-PG1_GMTP
ENSMUSG00000039236.18	Isg20	-0.962057	4.08004	-8.28211	2.12020691375162e-06	0.000544716	5.3284	PG1_0-PG1_GMTP
ENSMUSG00000033880.11	Lgals3bp	-0.44211	10.4366	-8.27273	2.14587707007657e-06	0.000544716	5.31205	PG1_0-PG1_GMTP
ENSMUSG00000033207.7	Mamdc2	0.491423	7.23001	8.27185	2.14829793399746e-06	0.000544716	5.31796	PG1_0-PG1_GMTP
ENSMUSG00000029417.9	Cxcl9	-0.930603	1.9845	-8.21349	2.31590005851818e-06	0.000580614	4.92785	PG1_0-PG1_GMTP
ENSMUSG00000040829.14	Zmynd15	-0.643695	3.81121	-8.17469	2.43499182205646e-06	0.000603689	5.18632	PG1_0-PG1_GMTP
ENSMUSG00000029063.16	Nadk	-0.374118	8.45819	-8.14211	2.54005214558288e-06	0.000622815	5.14677	PG1_0-PG1_GMTP
ENSMUSG00000032596.14	Uba7	-0.499242	7.0521	-8.1261	2.59345502743805e-06	0.000628997	5.13235	PG1_0-PG1_GMTP
ENSMUSG00000028268.14	Gbp3	-0.66167	6.60301	-8.11143	2.64343557955993e-06	0.000634226	5.11612	PG1_0-PG1_GMTP
ENSMUSG00000023341.15	Mx2	-0.613594	3.58391	-8.07506	2.77183670044161e-06	0.000656253	5.05169	PG1_0-PG1_GMTP
ENSMUSG00000021990.16	Spata13	-0.41721	4.79956	-8.06894	2.79406900471894e-06	0.000656253	5.0717	PG1_0-PG1_GMTP
ENSMUSG00000112627.1	4933412E12Rik	-0.64271	2.70562	-8.0561	2.84137337251577e-06	0.000660412	4.92586	PG1_0-PG1_GMTP
ENSMUSG00000068245.14	Phf11d	-0.766796	5.8212	-8.00292	3.04658995317013e-06	0.00070081	4.98136	PG1_0-PG1_GMTP
ENSMUSG00000018920.11	Cxcl16	-0.417299	7.86663	-7.96007	3.22342678946589e-06	0.000733922	4.91199	PG1_0-PG1_GMTP
ENSMUSG00000001123.15	Lgals9	-0.395271	7.65155	-7.90283	3.47694664160594e-06	0.000783648	4.83774	PG1_0-PG1_GMTP
ENSMUSG00000090272.9	Mndal	-0.479717	7.24526	-7.88439	3.56305074752942e-06	0.000790076	4.81586	PG1_0-PG1_GMTP
ENSMUSG00000038352.15	Arl5c	-0.456191	5.71224	-7.87821	3.59244460749256e-06	0.000790076	4.8198	PG1_0-PG1_GMTP
ENSMUSG00000037849.8	Ifi206	-0.96019	5.33675	-7.8687	3.63816479966055e-06	0.000790076	4.81063	PG1_0-PG1_GMTP
ENSMUSG00000024308.15	Tapbp	-0.424564	9.33598	-7.86685	3.64710576897751e-06	0.000790076	4.78397	PG1_0-PG1_GMTP
ENSMUSG00000038507.6	Parp12	-0.456628	7.29525	-7.83047	3.82823521847686e-06	0.000821341	4.74412	PG1_0-PG1_GMTP
ENSMUSG00000005667.8	Mthfd2	-0.580632	4.05316	-7.81826	3.89115852294977e-06	0.000823843	4.74708	PG1_0-PG1_GMTP
ENSMUSG00000064373.12	Selenop	0.419642	10.5915	7.81393	3.91374462963432e-06	0.000823843	4.71281	PG1_0-PG1_GMTP
ENSMUSG00000020641.16	Rsad2	-0.694425	7.8281	-7.78147	4.08750217127845e-06	0.000852378	4.67555	PG1_0-PG1_GMTP
ENSMUSG00000036986.16	Pml	-0.467541	6.43734	-7.75777	4.21955430326823e-06	0.000871768	4.65406	PG1_0-PG1_GMTP
ENSMUSG00000056144.14	Trim34a	-0.463193	5.5076	-7.6678	4.76379655465926e-06	0.00097518	4.54346	PG1_0-PG1_GMTP
ENSMUSG00000017144.8	Rnd3	-0.562323	4.77772	-7.64318	4.92539023349782e-06	0.000994829	4.51872	PG1_0-PG1_GMTP
ENSMUSG00000039994.15	Timeless	-0.652237	3.2445	-7.63966	4.9489558339146e-06	0.000994829	4.48562	PG1_0-PG1_GMTP
ENSMUSG00000030403.9	Vasp	-0.451464	7.49983	-7.62921	5.01973255891225e-06	0.00100005	4.47267	PG1_0-PG1_GMTP
ENSMUSG00000046718.8	Bst2	-0.587211	8.55616	-7.60239	5.20614182344709e-06	0.00102325	4.43038	PG1_0-PG1_GMTP
ENSMUSG00000068246.6	Apol9b	-1.38519	0.992464	-7.59742	5.24154188750518e-06	0.00102325	3.91119	PG1_0-PG1_GMTP
ENSMUSG00000078853.8	Igtp	-0.598129	5.59408	-7.59292	5.27375329374498e-06	0.00102325	4.44198	PG1_0-PG1_GMTP
ENSMUSG00000034926.3	Dhcr24	-0.469261	4.84725	-7.55803	5.5310126487268e-06	0.00106391	4.40438	PG1_0-PG1_GMTP
ENSMUSG00000040483.15	Xaf1	-0.647532	5.59297	-7.51025	5.90512132959283e-06	0.00112616	4.33016	PG1_0-PG1_GMTP
ENSMUSG00000104713.4	Gbp6	-1.14897	2.8281	-7.47487	6.19947712266872e-06	0.00117228	4.2384	PG1_0-PG1_GMTP
ENSMUSG00000025790.14	Slco3a1	-0.82427	4.06179	-7.44831	6.43068412119508e-06	0.00120578	4.26331	PG1_0-PG1_GMTP
ENSMUSG00000046245.13	Pilra	-0.495184	4.41842	-7.43608	6.54024500830549e-06	0.0012161	4.24527	PG1_0-PG1_GMTP
ENSMUSG00000057596.13	Trim30d	-0.534962	6.40022	-7.3919	6.95288467915082e-06	0.00127274	4.15792	PG1_0-PG1_GMTP
ENSMUSG00000076613.4	Ighg2b	-4.52299	-6.04719	-7.39014	6.96988653221828e-06	0.00127274	-1.55923	PG1_0-PG1_GMTP
ENSMUSG00000043263.13	Ifi209	-0.683089	7.65708	-7.38539	7.0159781570901e-06	0.00127274	4.13693	PG1_0-PG1_GMTP
ENSMUSG00000049723.14	Mmp12	0.44296	10.1576	7.34895	7.38061560050598e-06	0.00132809	4.07717	PG1_0-PG1_GMTP
ENSMUSG00000031613.9	Hpgd	0.636502	4.67581	7.33677	7.50696880955838e-06	0.00134002	4.10713	PG1_0-PG1_GMTP
ENSMUSG00000052270.7	Fpr2	-1.27961	1.34446	-7.28483	8.07209728068332e-06	0.00142947	3.69608	PG1_0-PG1_GMTP
ENSMUSG00000022463.8	Srebf2	-0.378164	7.18425	-7.26953	8.24704958048319e-06	0.00144895	3.9792	PG1_0-PG1_GMTP
ENSMUSG00000002103.16	Acp2	-0.333393	8.4589	-7.25426	8.42569723039355e-06	0.00146877	3.9484	PG1_0-PG1_GMTP
ENSMUSG00000051457.7	Spn	-0.520854	5.36812	-7.24256	8.56538340213442e-06	0.00148155	3.96531	PG1_0-PG1_GMTP
ENSMUSG00000037816.10	Fbxw17	-0.462019	5.40866	-7.21953	8.8476359233474e-06	0.00151859	3.93249	PG1_0-PG1_GMTP
ENSMUSG00000030990.18	Pgap2	-0.385429	5.90203	-7.20702	9.00495215552237e-06	0.00152543	3.90704	PG1_0-PG1_GMTP
ENSMUSG00000064215.13	Ifi27	0.720123	5.19934	7.19894	9.10823769435652e-06	0.00152543	3.90747	PG1_0-PG1_GMTP
ENSMUSG00000048031.15	Fcrl5	-1.32044	0.368487	-7.19877	9.11046574600488e-06	0.00152543	3.21062	PG1_0-PG1_GMTP
ENSMUSG00000012519.14	Mlkl	-0.532477	5.36801	-7.19351	9.17835076852273e-06	0.00152543	3.89683	PG1_0-PG1_GMTP
ENSMUSG00000072596.4	Ear2	0.907778	1.64453	7.18959	9.22925821501998e-06	0.00152543	3.67042	PG1_0-PG1_GMTP
ENSMUSG00000030047.14	Arhgap25	0.319623	8.18702	7.10059	1.04711421055929e-05	0.00171796	3.73177	PG1_0-PG1_GMTP
ENSMUSG00000006411.12	Nectin4	-0.404985	5.02544	-7.0731	1.08896849235886e-05	0.00177339	3.73417	PG1_0-PG1_GMTP
ENSMUSG00000090231.10	Cfb	-1.23592	1.89239	-7.06808	1.09679632461266e-05	0.00177339	3.57979	PG1_0-PG1_GMTP
ENSMUSG00000029474.7	Rnf34	-0.354532	5.87959	-7.0518	1.12262192005171e-05	0.00180209	3.68786	PG1_0-PG1_GMTP
ENSMUSG00000037731.5	Themis2	-0.354329	8.49771	-7.00962	1.19255933544443e-05	0.00190068	3.59923	PG1_0-PG1_GMTP
ENSMUSG00000040253.15	Gbp7	-0.573106	5.52666	-6.97749	1.24896076345267e-05	0.00197646	3.58804	PG1_0-PG1_GMTP
ENSMUSG00000059498.13	Fcgr3	0.357275	8.77502	6.97045	1.261675814256e-05	0.00198252	3.54119	PG1_0-PG1_GMTP
ENSMUSG00000002307.16	Daxx	-0.420653	6.65473	-6.95999	1.28085119501392e-05	0.00199858	3.54459	PG1_0-PG1_GMTP
ENSMUSG00000074578.14	Zfas1	-0.379132	5.90824	-6.93837	1.32146047286244e-05	0.00204762	3.52479	PG1_0-PG1_GMTP
ENSMUSG00000049502.17	Dtx3l	-0.482492	7.59243	-6.9261	1.34511193413562e-05	0.0020699	3.48489	PG1_0-PG1_GMTP
ENSMUSG00000024732.7	Ccdc86	-0.490609	5.18885	-6.91985	1.35731334526818e-05	0.00207437	3.51242	PG1_0-PG1_GMTP
ENSMUSG00000105324.1	Gm42705	3.03487	-7.30395	6.8982	1.40058099371579e-05	0.00212593	-2.16255	PG1_0-PG1_GMTP
ENSMUSG00000063268.12	Parp10	-0.415623	5.94373	-6.8703	1.4584743990803e-05	0.00219127	3.42571	PG1_0-PG1_GMTP
ENSMUSG00000039501.14	Znfx1	-0.585584	9.3815	-6.86804	1.46326927108067e-05	0.00219127	3.38981	PG1_0-PG1_GMTP
ENSMUSG00000049037.8	Clec4a1	-0.39259	7.37627	-6.84959	1.50310232028074e-05	0.0022298	3.37551	PG1_0-PG1_GMTP
ENSMUSG00000071350.12	Setdb2	-0.514131	3.99912	-6.84691	1.5089821461589e-05	0.0022298	3.43648	PG1_0-PG1_GMTP
ENSMUSG00000024679.10	Ms4a6d	-0.405506	8.00888	-6.81952	1.57049098076544e-05	0.00229828	3.32557	PG1_0-PG1_GMTP
ENSMUSG00000026088.15	Mitd1	-0.513623	3.93521	-6.8136	1.58412442557146e-05	0.00229828	3.39033	PG1_0-PG1_GMTP
ENSMUSG00000032690.16	Oas2	-0.444004	6.17149	-6.81269	1.58623067686903e-05	0.00229828	3.33785	PG1_0-PG1_GMTP
ENSMUSG00000025993.10	Slc40a1	0.450969	6.62365	6.80626	1.60121300322998e-05	0.00230502	3.32141	PG1_0-PG1_GMTP
ENSMUSG00000046223.10	Plaur	0.585591	5.32243	6.78366	1.6550779191385e-05	0.00236729	3.31231	PG1_0-PG1_GMTP
ENSMUSG00000028238.6	Atp6v0d2	0.323533	9.48828	6.77915	1.66603493785961e-05	0.00236779	3.25877	PG1_0-PG1_GMTP
ENSMUSG00000026866.16	Kynu	-0.676346	3.0304	-6.77007	1.68837560847189e-05	0.00237834	3.32344	PG1_0-PG1_GMTP
ENSMUSG00000033450.8	Tagap	-0.604903	2.94552	-6.76749	1.69477924795137e-05	0.00237834	3.31612	PG1_0-PG1_GMTP
ENSMUSG00000074345.4	Tnfaip8l3	-1.82589	-1.24569	-6.75392	1.72888296897637e-05	0.00240536	1.78139	PG1_0-PG1_GMTP
ENSMUSG00000027848.12	Olfml3	-0.638807	3.96807	-6.74953	1.7400797290075e-05	0.00240536	3.29832	PG1_0-PG1_GMTP
ENSMUSG00000035356.17	Nfkbiz	-0.595075	4.78728	-6.74691	1.7467768887197e-05	0.00240536	3.2725	PG1_0-PG1_GMTP
ENSMUSG00000034118.15	Tpst1	-0.44299	5.17751	-6.74288	1.75715438941845e-05	0.00240536	3.25628	PG1_0-PG1_GMTP
ENSMUSG00000029798.11	Herc6	-0.639077	5.93466	-6.70344	1.86228547050415e-05	0.00253373	3.18166	PG1_0-PG1_GMTP
ENSMUSG00000027962.14	Vcam1	0.466995	5.18285	6.68991	1.89986219815221e-05	0.00256001	3.17852	PG1_0-PG1_GMTP
ENSMUSG00000036067.12	Slc2a6	-0.636196	6.20799	-6.68824	1.90454896699277e-05	0.00256001	3.15418	PG1_0-PG1_GMTP
ENSMUSG00000033355.6	Rtp4	-0.439059	7.87134	-6.61138	2.13450549942161e-05	0.00285193	3.01784	PG1_0-PG1_GMTP
ENSMUSG00000073491.11	Ifi213	-0.87639	4.83298	-6.5784	2.24203897295348e-05	0.00297777	3.0239	PG1_0-PG1_GMTP
ENSMUSG00000074151.13	Nlrc5	-0.649532	5.8877	-6.56603	2.28382594069542e-05	0.00301533	2.97849	PG1_0-PG1_GMTP
ENSMUSG00000048498.7	Cd300e	-0.861796	2.86716	-6.54836	2.34499496216586e-05	0.00307787	3.00815	PG1_0-PG1_GMTP
ENSMUSG00000058317.12	Ube2e2	-0.652213	2.26077	-6.53864	2.37934235479318e-05	0.00310469	2.94989	PG1_0-PG1_GMTP
ENSMUSG00000038390.11	Gpr162	-0.542165	7.02218	-6.51806	2.45391455532545e-05	0.00318338	2.88713	PG1_0-PG1_GMTP
ENSMUSG00000029472.13	Anapc5	-0.312436	7.59581	-6.51145	2.478378635829e-05	0.00319654	2.87012	PG1_0-PG1_GMTP
ENSMUSG00000027883.15	Gpsm2	-0.388606	4.07989	-6.48651	2.57306118863021e-05	0.00327084	2.91304	PG1_0-PG1_GMTP
ENSMUSG00000106734.3	Gm20559	-0.402952	6.10559	-6.48647	2.57320670861084e-05	0.00327084	2.8546	PG1_0-PG1_GMTP
ENSMUSG00000035929.11	H2-Q4	-0.441602	7.0846	-6.48473	2.5799629365255e-05	0.00327084	2.83589	PG1_0-PG1_GMTP
ENSMUSG00000029780.14	Nt5c3	-0.554498	5.70817	-6.47006	2.63758517540364e-05	0.003325	2.83837	PG1_0-PG1_GMTP
ENSMUSG00000024899.7	Papss2	-0.336635	4.36568	-6.46282	2.66653974067534e-05	0.00334261	2.86809	PG1_0-PG1_GMTP
ENSMUSG00000042719.17	Naa25	-0.410286	5.21113	-6.44635	2.73365338820958e-05	0.0034076	2.81548	PG1_0-PG1_GMTP
ENSMUSG00000026896.14	Ifih1	-0.53637	7.08722	-6.43387	2.7857183639806e-05	0.00345321	2.75864	PG1_0-PG1_GMTP
ENSMUSG00000035208.16	Slfn8	-0.510486	7.19577	-6.42146	2.83849551356059e-05	0.00349475	2.73829	PG1_0-PG1_GMTP
ENSMUSG00000041936.18	Agrn	-0.536013	5.52187	-6.41866	2.85055769344827e-05	0.00349475	2.76527	PG1_0-PG1_GMTP
ENSMUSG00000021250.13	Fos	-0.377501	5.6056	-6.36498	3.09251000989662e-05	0.00374741	2.68165	PG1_0-PG1_GMTP
ENSMUSG00000044468.14	Tent5c	-0.483751	5.69855	-6.36365	3.09878902731627e-05	0.00374741	2.67734	PG1_0-PG1_GMTP
ENSMUSG00000087064.1	Sap30bpos	3.30367	-6.69596	6.35878	3.1218533791743e-05	0.00374741	-2.07413	PG1_0-PG1_GMTP
ENSMUSG00000027639.16	Samhd1	-0.301068	9.70209	-6.35724	3.12915850014808e-05	0.00374741	2.62211	PG1_0-PG1_GMTP
ENSMUSG00000039518.7	Cdsn	-4.00594	-5.04588	-6.35484	3.14061615849468e-05	0.00374741	-1.35859	PG1_0-PG1_GMTP
ENSMUSG00000019082.18	Slc25a22	-0.446522	5.05404	-6.33694	3.22747641513879e-05	0.00383057	2.65478	PG1_0-PG1_GMTP
ENSMUSG00000041164.15	Zmiz2	-0.355657	7.14723	-6.31448	3.34007802886929e-05	0.00394324	2.57507	PG1_0-PG1_GMTP
ENSMUSG00000044350.14	Lacc1	-0.268269	7.11841	-6.29979	3.41592170436404e-05	0.00400072	2.55286	PG1_0-PG1_GMTP
ENSMUSG00000018339.11	Gpx3	0.378171	5.14526	6.29813	3.4246286923305e-05	0.00400072	2.59276	PG1_0-PG1_GMTP
ENSMUSG00000091387.2	Gcnt4	-4.19546	-5.09308	-6.29246	3.4545018807985e-05	0.00400336	-1.40465	PG1_0-PG1_GMTP
ENSMUSG00000018395.19	Kif3a	0.325481	5.84018	6.28999	3.4676015067197e-05	0.00400336	2.56128	PG1_0-PG1_GMTP
ENSMUSG00000030745.9	Il21r	-0.380687	5.36804	-6.28752	3.48071430786077e-05	0.00400336	2.5698	PG1_0-PG1_GMTP
ENSMUSG00000069910.2	Spdl1	-0.37589	5.10641	-6.2559	3.6537263071979e-05	0.0041808	2.52943	PG1_0-PG1_GMTP
ENSMUSG00000037868.15	Egr2	0.388939	5.48356	6.23549	3.7702550180487e-05	0.00428157	2.48666	PG1_0-PG1_GMTP
ENSMUSG00000002227.15	Mov10	-0.437311	6.0197	-6.23378	3.78017272162346e-05	0.00428157	2.4706	PG1_0-PG1_GMTP
ENSMUSG00000029605.16	Oas1b	-0.585099	2.86877	-6.2301	3.80167333637102e-05	0.00428418	2.5535	PG1_0-PG1_GMTP
ENSMUSG00000020010.7	Vnn3	-0.704072	2.13969	-6.22474	3.83314770074981e-05	0.00429794	2.50522	PG1_0-PG1_GMTP
ENSMUSG00000085295.7	4930430E12Rik	-0.323656	5.76563	-6.20737	3.93722399581469e-05	0.00439256	2.43579	PG1_0-PG1_GMTP
ENSMUSG00000060675.13	Plaat3	-0.610393	4.01705	-6.17428	4.14377015245069e-05	0.0046	2.44788	PG1_0-PG1_GMTP
ENSMUSG00000027995.10	Tlr2	-0.453669	6.51136	-6.1513	4.29396295999701e-05	0.00474313	2.33247	PG1_0-PG1_GMTP
ENSMUSG00000025492.6	Ifitm3	-0.433278	9.40022	-6.14433	4.34060540061345e-05	0.0047533	2.292	PG1_0-PG1_GMTP
ENSMUSG00000068747.14	Sort1	0.390929	6.6457	6.14356	4.34577663191718e-05	0.0047533	2.31794	PG1_0-PG1_GMTP
ENSMUSG00000060183.6	Cxcl11	2.86347	-0.690191	6.13154	4.42769769149142e-05	0.00481928	1.55129	PG1_0-PG1_GMTP
ENSMUSG00000037921.15	Ddx60	-0.653756	5.69234	-6.10855	4.58878948719142e-05	0.00497037	2.28417	PG1_0-PG1_GMTP
ENSMUSG00000117042.1	2700054A10Rik	-4.43341	-4.70788	-6.09716	4.67096424309967e-05	0.00502111	-1.2828	PG1_0-PG1_GMTP
ENSMUSG00000048120.16	Entpd1	0.322641	7.84957	6.09583	4.68063507334906e-05	0.00502111	2.22604	PG1_0-PG1_GMTP
ENSMUSG00000039304.11	Tnfsf10	-0.659217	2.84766	-6.08861	4.73359354622941e-05	0.00503253	2.34598	PG1_0-PG1_GMTP
ENSMUSG00000030921.17	Trim30a	-0.453654	7.99856	-6.08824	4.73638961314743e-05	0.00503253	2.21254	PG1_0-PG1_GMTP
ENSMUSG00000013367.5	Iglon5	-2.21595	-1.36692	-6.07924	4.80334719544949e-05	0.00507948	1.10265	PG1_0-PG1_GMTP
ENSMUSG00000000682.7	Cd52	-0.280257	8.70726	-6.07394	4.84327017010427e-05	0.00509754	2.18436	PG1_0-PG1_GMTP
ENSMUSG00000004891.16	Nes	0.501685	3.73906	6.06216	4.93319809288172e-05	0.00516781	2.2887	PG1_0-PG1_GMTP
ENSMUSG00000064225.6	Paqr9	0.802321	0.85497	6.05872	4.95976124864111e-05	0.00517136	2.06709	PG1_0-PG1_GMTP
ENSMUSG00000036887.5	C1qa	-0.347442	9.25579	-6.05105	5.01965339200321e-05	0.00520947	2.14546	PG1_0-PG1_GMTP
ENSMUSG00000040084.9	Bub1b	-0.412294	4.37873	-6.04749	5.04772953988384e-05	0.00521435	2.23697	PG1_0-PG1_GMTP
ENSMUSG00000029822.15	Osbpl3	-0.331282	5.56995	-5.99938	5.44330158326784e-05	0.00559707	2.11637	PG1_0-PG1_GMTP
ENSMUSG00000115338.2	Pnp	-0.467057	5.73994	-5.96363	5.75844448610191e-05	0.00589395	2.05511	PG1_0-PG1_GMTP
ENSMUSG00000030737.17	Slco2b1	0.516397	3.92491	5.94921	5.89102003247032e-05	0.00600212	2.10644	PG1_0-PG1_GMTP
ENSMUSG00000053101.3	Gpr141	-0.39047	5.66459	-5.93776	5.99854667542684e-05	0.00608389	2.01622	PG1_0-PG1_GMTP
ENSMUSG00000032000.17	Birc3	-0.34435	6.28795	-5.90034	6.36454955260702e-05	0.00642589	1.94098	PG1_0-PG1_GMTP
ENSMUSG00000042726.14	Trafd1	-0.341722	8.19629	-5.89608	6.40765789788115e-05	0.00644027	1.90522	PG1_0-PG1_GMTP
ENSMUSG00000046031.7	Calhm6	-0.492209	4.61463	-5.87119	6.66602009020173e-05	0.00662585	1.94987	PG1_0-PG1_GMTP
ENSMUSG00000100714.6	2010308F09Rik	3.05484	-7.35538	5.87076	6.67062973572593e-05	0.00662585	-2.41603	PG1_0-PG1_GMTP
ENSMUSG00000027580.17	Helz2	-0.707492	7.33188	-5.86974	6.68137711468938e-05	0.00662585	1.87315	PG1_0-PG1_GMTP
ENSMUSG00000030717.9	Nupr1	-0.68598	3.47706	-5.84741	6.92314603108928e-05	0.00683523	1.96947	PG1_0-PG1_GMTP
ENSMUSG00000043807.6	Ly6g5b	4.09657	-4.68228	5.84345	6.96694415380121e-05	0.00684817	-1.37759	PG1_0-PG1_GMTP
ENSMUSG00000081929.1	Rps11-ps2	-3.48349	-5.16564	-5.83742	7.03425141393702e-05	0.006884	-1.61193	PG1_0-PG1_GMTP
ENSMUSG00000070031.11	Sp140	-0.284317	6.13108	-5.83427	7.06962512851811e-05	0.00688841	1.83889	PG1_0-PG1_GMTP
ENSMUSG00000054580.14	Pla2r1	-0.761537	1.22788	-5.82776	7.14343391252193e-05	0.00693006	1.83597	PG1_0-PG1_GMTP
ENSMUSG00000022126.6	Acod1	-1.07276	5.84823	-5.81322	7.31127896127821e-05	0.00706219	1.81233	PG1_0-PG1_GMTP
ENSMUSG00000008845.9	Cd163	1.14721	0.655526	5.80392	7.42080768989158e-05	0.00713709	1.68662	PG1_0-PG1_GMTP
ENSMUSG00000027219.13	Slc28a2	-0.354621	5.94409	-5.79379	7.54197992629395e-05	0.00721792	1.77855	PG1_0-PG1_GMTP
ENSMUSG00000033538.13	Casp4	-0.419804	5.30045	-5.79151	7.56954549041534e-05	0.00721792	1.7946	PG1_0-PG1_GMTP
ENSMUSG00000039809.10	Gabbr2	0.588035	2.30602	5.77797	7.73560299336449e-05	0.00731969	1.87225	PG1_0-PG1_GMTP
ENSMUSG00000039531.8	Zup1	-0.316847	4.55952	-5.77531	7.76865346207192e-05	0.00731969	1.80025	PG1_0-PG1_GMTP
ENSMUSG00000049093.9	Il23r	3.2591	-4.56864	5.77252	7.80337313541066e-05	0.00731969	-1.35215	PG1_0-PG1_GMTP
ENSMUSG00000064542.1	Gm22980	-3.48539	-6.90759	-5.77219	7.80749326896582e-05	0.00731969	-2.30818	PG1_0-PG1_GMTP
ENSMUSG00000030255.13	Sspn	1.63163	-2.8638	5.75651	8.00644072941646e-05	0.0074748	-0.206724	PG1_0-PG1_GMTP
ENSMUSG00000030187.15	Klra2	-1.06894	0.837258	-5.75005	8.08994249392871e-05	0.00752129	1.65681	PG1_0-PG1_GMTP
ENSMUSG00000045322.10	Tlr9	-0.568873	6.54447	-5.73789	8.24972382606119e-05	0.00763801	1.67418	PG1_0-PG1_GMTP
ENSMUSG00000015134.15	Aldh1a3	-3.39298	-5.22956	-5.72731	8.39134689296835e-05	0.00773703	-1.68523	PG1_0-PG1_GMTP
ENSMUSG00000091549.1	Gm6548	-0.408286	4.85088	-5.7227	8.45386795435559e-05	0.0077626	1.70209	PG1_0-PG1_GMTP
ENSMUSG00000004266.15	Ptpn6	-0.279223	8.89362	-5.70084	8.75702134955113e-05	0.00800801	1.58398	PG1_0-PG1_GMTP
ENSMUSG00000078349.3	AW011738	-0.675196	1.78198	-5.67559	9.12166437293268e-05	0.00830742	1.68927	PG1_0-PG1_GMTP
ENSMUSG00000045294.11	Insig1	-0.293278	5.91427	-5.6559	9.41702835082074e-05	0.00854155	1.55607	PG1_0-PG1_GMTP
ENSMUSG00000047945.6	Marcksl1	-0.572061	4.22583	-5.64024	9.65913066157864e-05	0.00872568	1.60215	PG1_0-PG1_GMTP
ENSMUSG00000026669.14	Mcm10	-0.474835	2.99156	-5.61674	0.000100348	0.00902844	1.62881	PG1_0-PG1_GMTP
ENSMUSG00000051043.16	Gprc5c	0.526308	3.43679	5.59107	0.000104628	0.00937575	1.56959	PG1_0-PG1_GMTP
ENSMUSG00000021950.15	Anxa8	2.7959	-6.13561	5.56797	0.000108645	0.00965774	-2.11133	PG1_0-PG1_GMTP
ENSMUSG00000042349.13	Ikbke	-0.282962	7.00195	-5.56634	0.000108934	0.00965774	1.38491	PG1_0-PG1_GMTP
ENSMUSG00000026748.13	Plxdc2	0.472268	5.24816	5.56556	0.000109073	0.00965774	1.43048	PG1_0-PG1_GMTP
ENSMUSG00000028885.8	Smpdl3b	-0.729172	2.86724	-5.56003	0.000110062	0.00970679	1.54368	PG1_0-PG1_GMTP
ENSMUSG00000030054.4	Gp9	-3.99244	-5.69276	-5.5406	0.000113613	0.00998053	-1.9537	PG1_0-PG1_GMTP
ENSMUSG00000050439.7	Enthd1	-2.23061	-2.45796	-5.53368	0.000114908	0.0100547	-0.0878121	PG1_0-PG1_GMTP
ENSMUSG00000030966.13	Trim21	-0.311129	5.75744	-5.527	0.000116173	0.0101256	1.34951	PG1_0-PG1_GMTP
ENSMUSG00000110631.1	Gm42047	-0.350059	4.78223	-5.51537	0.000118406	0.0102802	1.36893	PG1_0-PG1_GMTP
ENSMUSG00000003283.15	Hck	-0.332122	7.47138	-5.48765	0.00012392	0.010717	1.24701	PG1_0-PG1_GMTP
ENSMUSG00000027951.16	Adar	-0.363894	7.02563	-5.4853	0.000124398	0.010717	1.25044	PG1_0-PG1_GMTP
ENSMUSG00000042333.16	Tnfrsf14	-0.347686	5.1582	-5.46353	0.000128935	0.0110651	1.26646	PG1_0-PG1_GMTP
ENSMUSG00000069793.12	Slfn9	-0.730769	5.73868	-5.45992	0.000129704	0.0110684	1.23933	PG1_0-PG1_GMTP
ENSMUSG00000072620.3	Slfn2	-0.298839	9.05682	-5.4587	0.000129965	0.0110684	1.1833	PG1_0-PG1_GMTP
ENSMUSG00000025743.14	Sdc3	-0.308733	10.375	-5.45312	0.000131165	0.0111281	1.1711	PG1_0-PG1_GMTP
ENSMUSG00000020415.16	Pttg1	-0.375257	4.18756	-5.44493	0.00013295	0.0111936	1.2879	PG1_0-PG1_GMTP
ENSMUSG00000030560.17	Ctsc	-0.236428	8.07397	-5.4445	0.000133044	0.0111936	1.16742	PG1_0-PG1_GMTP
ENSMUSG00000028266.17	Lmo4	-0.382923	6.0075	-5.44269	0.000133442	0.0111936	1.20271	PG1_0-PG1_GMTP
ENSMUSG00000062007.13	Hsh2d	-1.9314	-1.50761	-5.43415	0.000135336	0.01131	0.391367	PG1_0-PG1_GMTP
ENSMUSG00000061232.16	H2-K1	-0.371016	11.7034	-5.41595	0.000139467	0.0116117	1.11265	PG1_0-PG1_GMTP
ENSMUSG00000095788.6	Sirpb1a	-0.463683	3.67805	-5.39785	0.000143707	0.0119024	1.24465	PG1_0-PG1_GMTP
ENSMUSG00000038776.13	Ephx1	0.30731	5.58939	5.39652	0.000144025	0.0119024	1.13897	PG1_0-PG1_GMTP
ENSMUSG00000038213.7	Tapbpl	-0.36273	5.67043	-5.39359	0.000144725	0.011916	1.13137	PG1_0-PG1_GMTP
ENSMUSG00000030208.15	Emp1	0.253638	7.61139	5.3861	0.000146532	0.0120205	1.07553	PG1_0-PG1_GMTP
ENSMUSG00000052593.16	Adam17	-0.245763	8.741	-5.37379	0.000149555	0.0122235	1.04308	PG1_0-PG1_GMTP
ENSMUSG00000023961.16	Enpp4	-0.564597	3.54704	-5.36643	0.000151393	0.0123286	1.20229	PG1_0-PG1_GMTP
ENSMUSG00000030402.5	Ppm1n	-1.87172	-1.41895	-5.35301	0.000154808	0.0125609	0.353154	PG1_0-PG1_GMTP
ENSMUSG00000036526.8	Card11	-0.372826	5.68205	-5.34545	0.000156765	0.0126735	1.05065	PG1_0-PG1_GMTP
ENSMUSG00000039997.16	Ifi203	-0.537262	7.51284	-5.3389	0.000158483	0.0127399	0.997708	PG1_0-PG1_GMTP
ENSMUSG00000101746.1	2310043L19Rik	-3.12243	-5.27442	-5.33668	0.00015907	0.0127399	-1.8714	PG1_0-PG1_GMTP
ENSMUSG00000027322.11	Siglec1	-0.610578	8.25846	-5.33582	0.000159298	0.0127399	0.983265	PG1_0-PG1_GMTP
ENSMUSG00000035493.10	Tgfbi	-0.341483	8.67405	-5.33263	0.000160147	0.012762	0.974286	PG1_0-PG1_GMTP
ENSMUSG00000020034.7	Tcp11l2	0.318519	5.56398	5.32655	0.000161777	0.012846	1.02308	PG1_0-PG1_GMTP
ENSMUSG00000006818.5	Sod2	-0.374785	6.5018	-5.31645	0.000164523	0.0129798	0.979076	PG1_0-PG1_GMTP
ENSMUSG00000032554.15	Trf	0.292351	8.83401	5.31608	0.000164625	0.0129798	0.945246	PG1_0-PG1_GMTP
ENSMUSG00000019302.16	Atp6v0a1	0.26505	8.87779	5.30946	0.000166453	0.0130777	0.93378	PG1_0-PG1_GMTP
ENSMUSG00000043323.17	Fbrsl1	-0.329754	4.96181	-5.30435	0.000167877	0.0131433	1.01096	PG1_0-PG1_GMTP
ENSMUSG00000072109.11	A530040E14Rik	-0.575945	2.87196	-5.29895	0.000169397	0.0132159	1.13089	PG1_0-PG1_GMTP
ENSMUSG00000067377.12	Tspan6	-3.38125	-4.27934	-5.29562	0.000170343	0.0132434	-1.44862	PG1_0-PG1_GMTP
ENSMUSG00000022216.17	Psme1	-0.308982	7.7429	-5.27964	0.000174952	0.0135365	0.894458	PG1_0-PG1_GMTP
ENSMUSG00000032625.14	Thsd7a	-3.40965	-4.57667	-5.27837	0.000175326	0.0135365	-1.59851	PG1_0-PG1_GMTP
ENSMUSG00000053395.15	Cacng8	-4.23641	-4.44491	-5.275	0.000176317	0.0135661	-1.53925	PG1_0-PG1_GMTP
ENSMUSG00000026466.16	Tor1aip1	-0.251514	7.68649	-5.2673	0.000178604	0.0136948	0.874354	PG1_0-PG1_GMTP
ENSMUSG00000117234.1	Gm7818	-1.3986	-0.502652	-5.26458	0.000179418	0.0137101	0.648298	PG1_0-PG1_GMTP
ENSMUSG00000028874.14	Fgr	-0.36447	4.69052	-5.25926	0.000181026	0.0137858	0.949938	PG1_0-PG1_GMTP
ENSMUSG00000024601.9	Isoc1	-0.289424	6.53543	-5.21602	0.000194652	0.014773	0.808697	PG1_0-PG1_GMTP
ENSMUSG00000024640.9	Psat1	0.353415	3.44807	5.21048	0.000196475	0.0148608	0.954098	PG1_0-PG1_GMTP
ENSMUSG00000064370.1	mt-Cytb	0.297905	9.19355	5.19892	0.000200332	0.015057	0.744451	PG1_0-PG1_GMTP
ENSMUSG00000020868.15	Xylt2	-0.298424	7.82252	-5.19867	0.000200418	0.015057	0.755977	PG1_0-PG1_GMTP
ENSMUSG00000044162.12	Tnip3	-0.297692	5.61527	-5.19185	0.000202732	0.0151797	0.794445	PG1_0-PG1_GMTP
ENSMUSG00000019929.16	Dcn	0.955425	-0.0039238	5.18516	0.000205031	0.0153006	0.700707	PG1_0-PG1_GMTP
ENSMUSG00000049401.10	Ogfr	-0.361765	6.99421	-5.16995	0.000210358	0.0156457	0.720551	PG1_0-PG1_GMTP
ENSMUSG00000071311.2	Gpr31b	-0.95097	0.862951	-5.16754	0.000211219	0.0156576	0.848641	PG1_0-PG1_GMTP
ENSMUSG00000079197.10	Psme2	-0.385439	7.49847	-5.15883	0.000214347	0.015798	0.692726	PG1_0-PG1_GMTP
ENSMUSG00000031382.14	Asb11	-1.73284	-2.90037	-5.15833	0.00021453	0.015798	-0.684749	PG1_0-PG1_GMTP
ENSMUSG00000073722.3	4931408C20Rik	-2.27478	-7.30827	-5.15381	0.000216174	0.0158283	-2.6162	PG1_0-PG1_GMTP
ENSMUSG00000039456.10	Morc3	-0.253443	6.60965	-5.1533	0.00021636	0.0158283	0.700339	PG1_0-PG1_GMTP
ENSMUSG00000045094.8	Arhgef37	-0.587485	1.9709	-5.13414	0.000223485	0.0162962	0.881219	PG1_0-PG1_GMTP
ENSMUSG00000044309.8	Apol7c	-1.40536	0.434988	-5.12856	0.000225606	0.0163747	0.723034	PG1_0-PG1_GMTP
ENSMUSG00000025324.8	Atp10a	-0.624472	3.21197	-5.12606	0.000226566	0.0163747	0.831593	PG1_0-PG1_GMTP
ENSMUSG00000016496.7	Cd274	-0.34694	7.3463	-5.12554	0.000226764	0.0163747	0.638292	PG1_0-PG1_GMTP
ENSMUSG00000054404.13	Slfn5	-0.467919	9.39494	-5.12313	0.000227691	0.0163886	0.613975	PG1_0-PG1_GMTP
ENSMUSG00000078616.2	Trim30c	-0.63051	3.78271	-5.10819	0.000233531	0.0167549	0.759561	PG1_0-PG1_GMTP
ENSMUSG00000033192.5	Lpcat2	-0.3602	5.85089	-5.10399	0.000235203	0.0168208	0.636989	PG1_0-PG1_GMTP
ENSMUSG00000039853.18	Trim14	-0.309754	6.09877	-5.08969	0.000240983	0.0171791	0.604922	PG1_0-PG1_GMTP
ENSMUSG00000060147.15	Serpinb6a	0.250461	8.71516	5.07452	0.000247276	0.0175716	0.53427	PG1_0-PG1_GMTP
ENSMUSG00000035852.11	Misp	-0.860961	1.03239	-5.07126	0.000248653	0.0176133	0.728284	PG1_0-PG1_GMTP
ENSMUSG00000003134.10	Tbc1d8	-0.283097	5.59048	-5.068	0.000250035	0.0176552	0.584586	PG1_0-PG1_GMTP
ENSMUSG00000089131.1	Gm24769	2.79088	-7.22272	5.04168	0.000261502	0.0184066	-2.63213	PG1_0-PG1_GMTP
ENSMUSG00000045092.8	S1pr1	0.30752	4.73808	5.03948	0.000262484	0.0184177	0.575985	PG1_0-PG1_GMTP
ENSMUSG00000039982.8	Dtx4	0.251336	6.49306	5.03527	0.000264377	0.0184923	0.50096	PG1_0-PG1_GMTP
ENSMUSG00000006418.17	Rnf114	-0.279938	7.65865	-5.02669	0.000268276	0.0187064	0.463464	PG1_0-PG1_GMTP
ENSMUSG00000035517.17	Tdrd7	-0.267817	6.54046	-5.01956	0.000271564	0.0188767	0.47277	PG1_0-PG1_GMTP
ENSMUSG00000022534.14	Mefv	-0.479086	4.292	-5.01292	0.000274663	0.0190328	0.560231	PG1_0-PG1_GMTP
ENSMUSG00000010358.13	Ifi35	-0.431515	5.16499	-5.00972	0.000276173	0.0190782	0.502614	PG1_0-PG1_GMTP
ENSMUSG00000071068.7	Treml2	-0.866472	1.82734	-5.00154	0.00028006	0.0192869	0.670678	PG1_0-PG1_GMTP
ENSMUSG00000029436.9	Mmp17	-2.8141	-2.96552	-4.99505	0.000283191	0.0194426	-0.858504	PG1_0-PG1_GMTP
ENSMUSG00000029648.13	Flt1	-0.642985	2.30876	-4.98684	0.000287198	0.0196572	0.646888	PG1_0-PG1_GMTP
ENSMUSG00000074342.3	I830077J02Rik	-0.366742	3.31636	-4.973	0.000294092	0.02005	0.570103	PG1_0-PG1_GMTP
ENSMUSG00000021057.15	Akap5	-3.38274	-5.63768	-4.97173	0.000294733	0.02005	-2.17552	PG1_0-PG1_GMTP
ENSMUSG00000031756.5	Cenpn	-0.538352	1.49314	-4.96573	0.00029778	0.0201957	0.603524	PG1_0-PG1_GMTP
ENSMUSG00000055994.15	Nod2	-0.518753	2.51163	-4.96153	0.000299934	0.0202801	0.599929	PG1_0-PG1_GMTP
ENSMUSG00000023030.16	Slc11a2	-0.248802	6.85844	-4.95238	0.000304685	0.0205391	0.349398	PG1_0-PG1_GMTP
ENSMUSG00000028525.16	Pde4b	-0.428764	3.72347	-4.94782	0.000307081	0.0206383	0.494482	PG1_0-PG1_GMTP
ENSMUSG00000034422.14	Parp14	-0.51212	9.09133	-4.94342	0.000309412	0.0206985	0.304966	PG1_0-PG1_GMTP
ENSMUSG00000014164.15	Klhl3	0.815213	0.675525	4.94263	0.000309832	0.0206985	0.495678	PG1_0-PG1_GMTP
ENSMUSG00000029471.13	Camkk2	-0.304581	6.56024	-4.93695	0.000312872	0.0208392	0.329526	PG1_0-PG1_GMTP
ENSMUSG00000021624.9	Cd180	-0.311068	8.964	-4.93255	0.000315251	0.0209351	0.286817	PG1_0-PG1_GMTP
ENSMUSG00000027660.16	Skil	-0.364386	6.55691	-4.92231	0.000320856	0.0212265	0.304202	PG1_0-PG1_GMTP
ENSMUSG00000025950.16	Idh1	0.207942	8.69921	4.92107	0.000321541	0.0212265	0.268694	PG1_0-PG1_GMTP
ENSMUSG00000021803.10	Cdhr1	-4.22004	-5.15206	-4.91451	0.000325196	0.0214044	-2.02604	PG1_0-PG1_GMTP
ENSMUSG00000078716.10	Tmem8b	0.673954	0.848269	4.91187	0.000326678	0.0214387	0.4714	PG1_0-PG1_GMTP
ENSMUSG00000024338.15	Psmb8	-0.393778	7.0266	-4.90565	0.000330194	0.0215937	0.264769	PG1_0-PG1_GMTP
ENSMUSG00000027827.17	Kcnab1	-0.80484	0.962767	-4.90428	0.000330975	0.0215937	0.471863	PG1_0-PG1_GMTP
ENSMUSG00000021423.6	Ly86	-0.251506	7.39562	-4.90105	0.000332827	0.0216512	0.249858	PG1_0-PG1_GMTP
ENSMUSG00000002289.16	Angptl4	0.469062	3.06597	4.89775	0.000334726	0.0217115	0.463185	PG1_0-PG1_GMTP
ENSMUSG00000070427.4	Il18bp	-0.347155	5.72548	-4.8837	0.000342942	0.02213	0.26207	PG1_0-PG1_GMTP
ENSMUSG00000023249.15	Parp3	-0.358607	3.98011	-4.88333	0.000343162	0.02213	0.363628	PG1_0-PG1_GMTP
ENSMUSG00000022575.5	Gsdmd	-0.321307	6.93661	-4.88051	0.000344836	0.0221738	0.22283	PG1_0-PG1_GMTP
ENSMUSG00000089809.9	Rasgef1b	-0.222024	7.45395	-4.87169	0.000350132	0.0224497	0.197684	PG1_0-PG1_GMTP
ENSMUSG00000015222.18	Map2	-0.998067	0.753335	-4.86249	0.000355745	0.0227443	0.387191	PG1_0-PG1_GMTP
ENSMUSG00000050370.5	Ch25h	1.46935	-1.19191	4.85827	0.00035835	0.0228453	-0.10062	PG1_0-PG1_GMTP
ENSMUSG00000043687.15	1190005I06Rik	2.98337	-3.36923	4.85244	0.000361986	0.0230114	-1.22215	PG1_0-PG1_GMTP
ENSMUSG00000009035.15	Tmem184b	-0.258034	7.06759	-4.85076	0.000363039	0.0230127	0.168247	PG1_0-PG1_GMTP
ENSMUSG00000035459.18	Stab2	0.553046	3.19921	4.84416	0.00036721	0.0232112	0.363029	PG1_0-PG1_GMTP
ENSMUSG00000067212.8	H2-T23	-0.320141	9.79085	-4.8266	0.00037856	0.023861	0.0983058	PG1_0-PG1_GMTP
ENSMUSG00000100204.1	Gm4849	3.94011	-6.05452	4.82321	0.000380797	0.0239224	-2.38219	PG1_0-PG1_GMTP
ENSMUSG00000058163.14	Gm5431	-0.425829	7.08341	-4.82058	0.000382539	0.0239224	0.115134	PG1_0-PG1_GMTP
ENSMUSG00000033720.12	Sfxn5	-0.464613	3.70868	-4.82026	0.000382749	0.0239224	0.278751	PG1_0-PG1_GMTP
ENSMUSG00000056692.13	Ilrun	-0.22256	8.08659	-4.81653	0.000385237	0.0240106	0.0920384	PG1_0-PG1_GMTP
ENSMUSG00000079293.11	Clec7a	0.24371	10.4974	4.78506	0.000406892	0.0252896	0.0250231	PG1_0-PG1_GMTP
ENSMUSG00000003418.11	St8sia6	-1.07427	-0.966881	-4.77492	0.000414131	0.0256681	-0.120527	PG1_0-PG1_GMTP
ENSMUSG00000038677.14	Scube3	1.24194	-0.797273	4.76721	0.000419736	0.0259434	-0.0748185	PG1_0-PG1_GMTP
ENSMUSG00000004610.4	Etfb	0.667315	0.437147	4.76029	0.000424828	0.0261856	0.195662	PG1_0-PG1_GMTP
ENSMUSG00000053007.9	Creb5	-0.431422	5.19125	-4.74839	0.000433731	0.0266225	0.0488719	PG1_0-PG1_GMTP
ENSMUSG00000054203.7	Ifi205	-0.737732	3.50152	-4.74684	0.000434911	0.0266225	0.171609	PG1_0-PG1_GMTP
ENSMUSG00000055723.6	Rras2	0.440869	2.24949	4.74471	0.000436525	0.0266225	0.254519	PG1_0-PG1_GMTP
ENSMUSG00000054676.15	1600014C10Rik	-0.350207	5.22452	-4.7445	0.000436689	0.0266225	0.0404518	PG1_0-PG1_GMTP
ENSMUSG00000096727.3	Psmb9	-0.392979	6.18772	-4.73604	0.00044319	0.0269452	-0.0111277	PG1_0-PG1_GMTP
ENSMUSG00000016206.6	H2-M3	-0.253931	6.04126	-4.7319	0.000446402	0.0270334	-0.013892	PG1_0-PG1_GMTP
ENSMUSG00000030474.9	Siglece	-0.938755	1.69485	-4.73105	0.000447063	0.0270334	0.239579	PG1_0-PG1_GMTP
ENSMUSG00000060538.14	Tmem219	-0.301116	4.53834	-4.72895	0.000448708	0.0270595	0.0537767	PG1_0-PG1_GMTP
ENSMUSG00000097960.1	A330074K22Rik	-1.41334	0.831026	-4.72405	0.000452566	0.0272186	0.187266	PG1_0-PG1_GMTP
ENSMUSG00000000411.7	Tssk3	3.76289	-4.87006	4.7149	0.000459868	0.027553	-2.02781	PG1_0-PG1_GMTP
ENSMUSG00000018459.15	Slc13a3	-0.847633	1.92307	-4.714	0.000460596	0.027553	0.211744	PG1_0-PG1_GMTP
ENSMUSG00000086503.4	Xist	-0.960744	1.33992	-4.70083	0.000471327	0.0281196	0.183498	PG1_0-PG1_GMTP
ENSMUSG00000117897.1	Gm50151	-3.43035	-3.55412	-4.69364	0.000477304	0.0283479	-1.4542	PG1_0-PG1_GMTP
ENSMUSG00000072844.6	G530011O06Rik	-0.647163	1.53201	-4.69317	0.000477696	0.0283479	0.176785	PG1_0-PG1_GMTP
ENSMUSG00000044827.10	Tlr1	-0.265326	7.07632	-4.68792	0.000482115	0.0285343	-0.11807	PG1_0-PG1_GMTP
ENSMUSG00000036249.16	Rbm43	-0.234746	5.30677	-4.67254	0.000495291	0.0290885	-0.0896954	PG1_0-PG1_GMTP
ENSMUSG00000000628.10	Hk2	-0.293653	6.11442	-4.67251	0.000495318	0.0290885	-0.120774	PG1_0-PG1_GMTP
ENSMUSG00000040794.5	C1qtnf4	3.95783	-7.25586	4.67243	0.000495389	0.0290885	-2.77428	PG1_0-PG1_GMTP
ENSMUSG00000048216.13	Gpr85	-0.352783	4.128	-4.66878	0.000498571	0.0291984	-0.018975	PG1_0-PG1_GMTP
ENSMUSG00000105990.1	Gm43307	3.30455	-5.0971	4.65004	0.000515256	0.0300966	-2.14706	PG1_0-PG1_GMTP
ENSMUSG00000043336.14	Filip1l	-0.310386	4.6702	-4.64718	0.000517846	0.0301138	-0.0982627	PG1_0-PG1_GMTP
ENSMUSG00000031257.14	Nox1	-1.01659	-0.617037	-4.64674	0.00051825	0.0301138	-0.17912	PG1_0-PG1_GMTP
ENSMUSG00000039285.12	Azi2	-0.299024	6.31552	-4.63032	0.000533433	0.030806	-0.201394	PG1_0-PG1_GMTP
ENSMUSG00000021823.10	Vcl	0.373217	4.59971	4.62988	0.000533853	0.030806	-0.123759	PG1_0-PG1_GMTP
ENSMUSG00000041544.11	Disp3	3.6277	-7.29219	4.6294	0.000534303	0.030806	-2.79913	PG1_0-PG1_GMTP
ENSMUSG00000020695.14	Mrc2	1.26337	-0.120513	4.62747	0.00053612	0.0308311	-0.0899897	PG1_0-PG1_GMTP
ENSMUSG00000003420.8	Fcgrt	0.365223	5.74097	4.62082	0.000542431	0.0311138	-0.199213	PG1_0-PG1_GMTP
ENSMUSG00000021725.9	Parp8	-0.292001	5.6366	-4.61772	0.000545403	0.0312041	-0.200665	PG1_0-PG1_GMTP
ENSMUSG00000034353.14	Ramp1	0.474449	3.09258	4.61344	0.000549531	0.0313025	-0.0198222	PG1_0-PG1_GMTP
ENSMUSG00000020810.5	Cygb	3.67913	-5.66274	4.61303	0.00054993	0.0313025	-2.35735	PG1_0-PG1_GMTP
ENSMUSG00000033174.17	Mgll	0.364729	5.84446	4.60765	0.00055517	0.0315204	-0.226393	PG1_0-PG1_GMTP
ENSMUSG00000039232.12	Stx11	-0.464915	3.47577	-4.60568	0.000557098	0.0315345	-0.0687993	PG1_0-PG1_GMTP
ENSMUSG00000058046.1	4933430I17Rik	-0.645351	3.13429	-4.60452	0.000558245	0.0315345	-0.0388093	PG1_0-PG1_GMTP
ENSMUSG00000025025.14	Mxi1	0.326721	5.03281	4.60127	0.000561451	0.0316061	-0.201303	PG1_0-PG1_GMTP
ENSMUSG00000039747.11	Orai2	-0.24946	5.19264	-4.59975	0.000562959	0.0316061	-0.212471	PG1_0-PG1_GMTP
ENSMUSG00000022529.11	Zfp263	-0.209926	6.28608	-4.59894	0.000563762	0.0316061	-0.256183	PG1_0-PG1_GMTP
ENSMUSG00000029672.16	Fam3c	-0.210415	6.453	-4.59676	0.000565939	0.0316486	-0.264773	PG1_0-PG1_GMTP
ENSMUSG00000021575.16	Ahrr	-0.319612	5.39933	-4.59219	0.000570519	0.031825	-0.235805	PG1_0-PG1_GMTP
ENSMUSG00000079491.9	H2-T10	-0.421618	3.34412	-4.58606	0.000576724	0.0320909	-0.0900225	PG1_0-PG1_GMTP
ENSMUSG00000097006.7	9530082P21Rik	-0.75375	1.05135	-4.58008	0.000582846	0.0323043	-0.0189322	PG1_0-PG1_GMTP
ENSMUSG00000021904.6	Sema3g	-4.21958	-4.91465	-4.57949	0.000583456	0.0323043	-2.12214	PG1_0-PG1_GMTP
ENSMUSG00000068417.8	Pnp2	-0.672134	1.86577	-4.57789	0.000585112	0.0323158	-0.00935738	PG1_0-PG1_GMTP
ENSMUSG00000026980.15	Ly75	-0.453988	3.63602	-4.57586	0.000587207	0.0323515	-0.136008	PG1_0-PG1_GMTP
ENSMUSG00000005800.3	Mmp8	0.241054	6.28892	4.57354	0.000589623	0.0323834	-0.301378	PG1_0-PG1_GMTP
ENSMUSG00000046687.6	Gm5424	-1.22938	-0.474295	-4.57252	0.000590689	0.0323834	-0.24297	PG1_0-PG1_GMTP
ENSMUSG00000032344.17	Cgas	-0.357703	3.90795	-4.5588	0.000605192	0.0330972	-0.191366	PG1_0-PG1_GMTP
ENSMUSG00000034575.13	Tent4a	-0.339969	5.14306	-4.5532	0.000611224	0.0331372	-0.292262	PG1_0-PG1_GMTP
ENSMUSG00000049608.8	Gpr55	-1.04927	-0.0805899	-4.5529	0.000611549	0.0331372	-0.188228	PG1_0-PG1_GMTP
ENSMUSG00000030346.16	Rad51ap1	-0.55725	1.42088	-4.55285	0.000611593	0.0331372	-0.0495172	PG1_0-PG1_GMTP
ENSMUSG00000062421.13	Arf2	-0.235307	6.22267	-4.55253	0.000611949	0.0331372	-0.336769	PG1_0-PG1_GMTP
ENSMUSG00000037405.8	Icam1	-0.405376	6.56083	-4.55089	0.000613725	0.0331372	-0.349211	PG1_0-PG1_GMTP
ENSMUSG00000030774.13	Pak1	-0.216719	6.63451	-4.54987	0.000614834	0.0331372	-0.352929	PG1_0-PG1_GMTP
ENSMUSG00000045868.12	Gvin1	-0.618001	4.5568	-4.54364	0.000621652	0.0333534	-0.272508	PG1_0-PG1_GMTP
ENSMUSG00000118365.1	Gm41724	-3.63506	-5.25368	-4.54297	0.000622393	0.0333534	-2.26036	PG1_0-PG1_GMTP
ENSMUSG00000097534.3	Gm16675	-0.51556	1.9172	-4.54212	0.000623331	0.0333534	-0.0691853	PG1_0-PG1_GMTP
ENSMUSG00000026365.15	Cfh	0.324363	4.76574	4.53734	0.000628631	0.0335565	-0.298207	PG1_0-PG1_GMTP
ENSMUSG00000036390.8	Gadd45a	0.367801	5.30853	4.51251	0.000656928	0.0349411	-0.372817	PG1_0-PG1_GMTP
ENSMUSG00000116480.1	Gm49512	-3.58893	-6.69054	-4.51185	0.0006577	0.0349411	-2.70088	PG1_0-PG1_GMTP
ENSMUSG00000008496.19	Pou2f2	-0.267191	6.46908	-4.50893	0.000661117	0.0350392	-0.421614	PG1_0-PG1_GMTP
ENSMUSG00000000693.10	Loxl3	-0.319177	4.6974	-4.50513	0.000665592	0.0351928	-0.350618	PG1_0-PG1_GMTP
ENSMUSG00000092134.1	Gm17089	-3.94805	-5.6901	-4.50004	0.000671635	0.0354283	-2.42372	PG1_0-PG1_GMTP
ENSMUSG00000021703.9	Serinc5	0.284879	4.82906	4.49767	0.000674468	0.0354939	-0.372543	PG1_0-PG1_GMTP
ENSMUSG00000045827.10	Serpinb9	-0.302064	3.88254	-4.4946	0.000678165	0.0356044	-0.301531	PG1_0-PG1_GMTP
ENSMUSG00000022505.9	Emp2	0.319215	3.8477	4.48256	0.000692827	0.0362889	-0.319337	PG1_0-PG1_GMTP
ENSMUSG00000031712.10	Il15	-0.281209	4.64346	-4.47431	0.000703071	0.0367392	-0.401412	PG1_0-PG1_GMTP
ENSMUSG00000003308.15	Keap1	-0.30056	6.23712	-4.46918	0.000709525	0.0369898	-0.485933	PG1_0-PG1_GMTP
ENSMUSG00000034413.14	Neurl1b	-0.429244	2.36573	-4.4676	0.000711526	0.0370077	-0.212725	PG1_0-PG1_GMTP
ENSMUSG00000020572.8	Nampt	-0.256134	8.25327	-4.46233	0.000718238	0.0372699	-0.538774	PG1_0-PG1_GMTP
ENSMUSG00000025017.10	Pik3ap1	-0.227992	10.0351	-4.4601	0.000721087	0.0373309	-0.553137	PG1_0-PG1_GMTP
ENSMUSG00000093789.3	Methig1	-3.57476	-7.28677	-4.45283	0.000730492	0.0377302	-2.8673	PG1_0-PG1_GMTP
ENSMUSG00000020689.4	Itgb3	0.449253	3.87082	4.44716	0.000737914	0.0379403	-0.383849	PG1_0-PG1_GMTP
ENSMUSG00000020593.16	Lpin1	0.296817	5.66169	4.44713	0.000737959	0.0379403	-0.505049	PG1_0-PG1_GMTP
ENSMUSG00000041431.16	Ccnb1	-0.39533	3.6114	-4.44346	0.000742802	0.0381015	-0.364729	PG1_0-PG1_GMTP
ENSMUSG00000052821.3	Cysltr1	-0.266535	4.80615	-4.44183	0.000744955	0.0381243	-0.47034	PG1_0-PG1_GMTP
ENSMUSG00000055447.19	Cd47	-0.194067	8.58892	-4.43743	0.000750832	0.0383371	-0.586977	PG1_0-PG1_GMTP
ENSMUSG00000026657.17	Frmd4a	-0.322828	6.54899	-4.40908	0.00078982	0.0402357	-0.602626	PG1_0-PG1_GMTP
ENSMUSG00000031792.15	Usb1	-0.262742	5.80103	-4.40712	0.000792594	0.0402851	-0.582192	PG1_0-PG1_GMTP
ENSMUSG00000001467.5	Cyp51	-0.308619	5.33076	-4.40547	0.000794944	0.0403127	-0.564896	PG1_0-PG1_GMTP
ENSMUSG00000023045.13	Soat2	-1.4309	-1.15216	-4.38155	0.000829707	0.0419802	-0.676113	PG1_0-PG1_GMTP
ENSMUSG00000026473.16	Glul	0.218524	8.34219	4.37005	0.000846972	0.0426859	-0.705933	PG1_0-PG1_GMTP
ENSMUSG00000105504.4	Gbp5	-0.551838	4.85155	-4.36972	0.000847481	0.0426859	-0.601956	PG1_0-PG1_GMTP
ENSMUSG00000016255.5	Tubb1	-0.802353	-0.236269	-4.36709	0.000851477	0.0427906	-0.481966	PG1_0-PG1_GMTP
ENSMUSG00000073752.2	Gm10570	3.16876	-5.55763	4.35987	0.000862574	0.0432508	-2.45791	PG1_0-PG1_GMTP
ENSMUSG00000073412.6	Lst1	-0.233897	6.09678	-4.35843	0.000864799	0.0432651	-0.680193	PG1_0-PG1_GMTP
ENSMUSG00000115204.1	Gm36642	-3.06137	-5.15091	-4.35693	0.000867138	0.0432851	-2.33286	PG1_0-PG1_GMTP
ENSMUSG00000024953.17	Prdx5	-0.326495	8.21619	-4.34557	0.000884987	0.0440775	-0.748739	PG1_0-PG1_GMTP
ENSMUSG00000026390.7	Marco	-0.738104	1.84947	-4.34312	0.000888893	0.0440829	-0.397099	PG1_0-PG1_GMTP
ENSMUSG00000029298.15	Gbp9	-0.442706	6.5528	-4.34302	0.000889048	0.0440829	-0.721659	PG1_0-PG1_GMTP
ENSMUSG00000082229.1	Nap1l2	-0.755776	0.554024	-4.335	0.000901955	0.0446238	-0.432236	PG1_0-PG1_GMTP
ENSMUSG00000022351.14	Sqle	-0.307891	4.80434	-4.3321	0.000906653	0.044757	-0.666232	PG1_0-PG1_GMTP
ENSMUSG00000051379.12	Flrt3	-0.795536	0.505738	-4.32007	0.000926478	0.0455609	-0.459063	PG1_0-PG1_GMTP
ENSMUSG00000043832.13	Clec4a3	-0.229882	7.09298	-4.31974	0.000927023	0.0455609	-0.776801	PG1_0-PG1_GMTP
ENSMUSG00000111090.1	Gm30698	2.36493	-3.90698	4.31801	0.000929922	0.045603	-1.91499	PG1_0-PG1_GMTP
ENSMUSG00000103624.1	Gm3081	-2.95323	-7.00317	-4.31514	0.000934722	0.0456413	-2.86187	PG1_0-PG1_GMTP
ENSMUSG00000086603.1	Gm13620	4.09162	-6.32119	4.3151	0.000934794	0.0456413	-2.6959	PG1_0-PG1_GMTP
ENSMUSG00000032527.13	Pccb	0.273489	5.25081	4.31265	0.000938929	0.0457431	-0.727413	PG1_0-PG1_GMTP
ENSMUSG00000027605.18	Acss2	-0.355203	3.19613	-4.30985	0.000943671	0.0458739	-0.55576	PG1_0-PG1_GMTP
ENSMUSG00000039934.12	Gsap	-0.252726	5.5058	-4.30788	0.000947016	0.0459365	-0.748292	PG1_0-PG1_GMTP
ENSMUSG00000018167.10	Stard3	-0.28018	6.99208	-4.30375	0.000954076	0.0461029	-0.803494	PG1_0-PG1_GMTP
ENSMUSG00000097060.1	Gm26759	-3.08065	-6.54656	-4.30346	0.00095458	0.0461029	-2.75885	PG1_0-PG1_GMTP
ENSMUSG00000074677.11	Sirpb1c	-0.226523	5.58084	-4.28686	0.000983554	0.0472859	-0.789544	PG1_0-PG1_GMTP
ENSMUSG00000020357.3	Flt4	-1.39954	-0.653341	-4.28552	0.000985932	0.0472859	-0.677739	PG1_0-PG1_GMTP
ENSMUSG00000111118.1	Gm6545	-1.07249	4.09196	-4.28498	0.000986892	0.0472859	-0.692594	PG1_0-PG1_GMTP
ENSMUSG00000024378.9	Stard4	-0.364151	4.99889	-4.28452	0.000987711	0.0472859	-0.764016	PG1_0-PG1_GMTP
ENSMUSG00000031714.9	Gab1	0.507551	4.06144	4.28342	0.000989671	0.0472859	-0.692434	PG1_0-PG1_GMTP
ENSMUSG00000051748.2	Wfdc21	1.80221	-4.92797	4.28037	0.000995128	0.0474451	-2.30738	PG1_0-PG1_GMTP
ENSMUSG00000017400.10	Stac2	0.269161	5.65853	4.2776	0.0010001	0.0474888	-0.809558	PG1_0-PG1_GMTP
ENSMUSG00000078153.3	Psme2b	-0.342139	5.15951	-4.27749	0.0010003	0.0474888	-0.785859	PG1_0-PG1_GMTP
ENSMUSG00000056569.11	Mpz	1.14036	0.0768519	4.27433	0.00100601	0.0476125	-0.571708	PG1_0-PG1_GMTP
ENSMUSG00000079363.7	Gbp4	-0.774663	2.50866	-4.27369	0.00100718	0.0476125	-0.553502	PG1_0-PG1_GMTP
ENSMUSG00000000204.16	Slfn4	-1.17321	2.47495	-4.26701	0.00101939	0.048071	-0.562286	PG1_0-PG1_GMTP
ENSMUSG00000004952.13	Rasa4	-0.246174	8.22602	-4.26604	0.00102118	0.048071	-0.892967	PG1_0-PG1_GMTP
ENSMUSG00000041734.15	Kirrel	0.74614	-0.225633	4.26353	0.00102582	0.0481118	-0.629818	PG1_0-PG1_GMTP
ENSMUSG00000040775.6	Gm9772	2.79083	-6.96473	4.26263	0.00102748	0.0481118	-2.87631	PG1_0-PG1_GMTP
ENSMUSG00000034438.16	Gbp8	-0.366166	3.22914	-4.26129	0.00102997	0.0481118	-0.644514	PG1_0-PG1_GMTP
ENSMUSG00000105871.1	Gm43147	3.22581	-4.86343	4.26091	0.00103067	0.0481118	-2.29871	PG1_0-PG1_GMTP
ENSMUSG00000053338.9	Tarm1	1.70977	-1.90938	4.25648	0.00103894	0.0483966	-1.07469	PG1_0-PG1_GMTP
ENSMUSG00000083505.1	Gm7541	2.36911	-7.0999	4.25146	0.0010484	0.0487353	-2.91097	PG1_0-PG1_GMTP
ENSMUSG00000023960.13	Enpp5	-1.1386	-0.42261	-4.24934	0.00105243	0.0488208	-0.683323	PG1_0-PG1_GMTP
ENSMUSG00000038215.15	Cep44	0.339206	2.66128	4.24746	0.00105601	0.0488852	-0.611899	PG1_0-PG1_GMTP
ENSMUSG00000036636.10	Clcn7	-0.217572	8.76167	-4.24488	0.00106095	0.0490122	-0.936785	PG1_0-PG1_GMTP
ENSMUSG00000109399.1	Gm44982	2.79472	-4.60851	4.2406	0.00106918	0.0492904	-2.22764	PG1_0-PG1_GMTP
ENSMUSG00000068129.5	Cst7	-0.671529	2.22964	-4.23781	0.00107459	0.0494379	-0.594365	PG1_0-PG1_GMTP
ENSMUSG00000066150.12	Slc31a1	-0.205412	6.80356	-4.23464	0.00108075	0.049619	-0.924276	PG1_0-PG1_GMTP
ENSMUSG00000098915.1	Rpl15-ps2	-3.93192	-5.6587	-4.23129	0.00108732	0.049818	-2.55854	PG1_0-PG1_GMTP
ENSMUSG00000055737.12	Ghr	1.4187	-2.44108	4.22777	0.00109426	0.0500334	-1.30921	PG1_0-PG1_GMTP
ENSMUSG00000004730.15	Adgre1	-0.205711	11.23	-4.22551	0.00109876	0.0500413	-0.975582	PG1_0-PG1_GMTP
ENSMUSG00000066682.11	Pilrb2	-0.371828	2.71481	-4.22542	0.00109892	0.0500413	-0.655093	PG1_0-PG1_GMTP
ENSMUSG00000022893.14	Adamts1	0.655656	1.32117	4.21698	0.00111585	0.0506623	-0.595143	PG1_0-PG1_GMTP
ENSMUSG00000001166.17	Oas1c	-0.383722	2.84259	-4.21636	0.0011171	0.0506623	-0.683218	PG1_0-PG1_GMTP
ENSMUSG00000101431.1	Gm7901	-4.0051	-6.22697	-4.21329	0.00112333	0.0508414	-2.72204	PG1_0-PG1_GMTP
ENSMUSG00000038188.17	Scarf1	-0.336319	4.99674	-4.20838	0.00113335	0.0511913	-0.901163	PG1_0-PG1_GMTP
ENSMUSG00000095609.2	Gm21188	-0.23723	6.53536	-4.19597	0.00115912	0.0522492	-0.987482	PG1_0-PG1_GMTP
ENSMUSG00000027907.4	S100a11	0.209442	7.63938	4.19075	0.00117014	0.0526396	-1.02143	PG1_0-PG1_GMTP
ENSMUSG00000034220.7	Gpc1	-0.271285	5.93765	-4.18926	0.00117329	0.0526755	-0.980466	PG1_0-PG1_GMTP
ENSMUSG00000020604.13	Arsg	0.411718	2.24955	4.18392	0.00118471	0.0530174	-0.687973	PG1_0-PG1_GMTP
ENSMUSG00000072688.2	Gm10399	3.01136	-4.58454	4.18348	0.00118566	0.0530174	-2.2581	PG1_0-PG1_GMTP
ENSMUSG00000044674.6	Fzd1	0.365389	2.64645	4.18164	0.00118963	0.0530399	-0.724823	PG1_0-PG1_GMTP
ENSMUSG00000032470.17	Mras	0.281742	3.80969	4.18104	0.00119092	0.0530399	-0.849898	PG1_0-PG1_GMTP
ENSMUSG00000060568.14	Fam78b	0.610656	1.98697	4.17304	0.00120834	0.0537083	-0.68974	PG1_0-PG1_GMTP
ENSMUSG00000032649.14	Colgalt2	-3.17306	-6.11921	-4.16566	0.00122463	0.0543242	-2.71884	PG1_0-PG1_GMTP
ENSMUSG00000091144.2	Phf11c	-0.643367	0.849686	-4.15951	0.00123838	0.0548252	-0.693447	PG1_0-PG1_GMTP
ENSMUSG00000028337.14	Coro2a	-0.191401	7.18878	-4.15601	0.00124629	0.0550661	-1.07617	PG1_0-PG1_GMTP
ENSMUSG00000021636.15	Marveld2	0.655979	0.548809	4.14953	0.00126103	0.0555312	-0.721718	PG1_0-PG1_GMTP
ENSMUSG00000031520.6	Vegfc	1.22156	-1.60373	4.1492	0.00126179	0.0555312	-1.1031	PG1_0-PG1_GMTP
ENSMUSG00000023067.14	Cdkn1a	-0.249983	7.0307	-4.14536	0.00127064	0.0558105	-1.09213	PG1_0-PG1_GMTP
ENSMUSG00000027469.16	Tpx2	-0.269961	4.55279	-4.13651	0.00129125	0.0565115	-0.999811	PG1_0-PG1_GMTP
ENSMUSG00000019850.11	Tnfaip3	-0.233892	5.54636	-4.13633	0.00129166	0.0565115	-1.06063	PG1_0-PG1_GMTP
ENSMUSG00000048251.15	Bcl11b	-2.69245	-7.25586	-4.13442	0.00129616	0.0565972	-2.99484	PG1_0-PG1_GMTP
ENSMUSG00000074796.10	Slc4a11	1.07873	-2.12824	4.13237	0.001301	0.0566977	-1.29522	PG1_0-PG1_GMTP
ENSMUSG00000017493.12	Igfbp4	0.307483	6.49635	4.1284	0.00131043	0.0569971	-1.10942	PG1_0-PG1_GMTP
ENSMUSG00000042476.12	Abcb4	0.317475	4.26666	4.12416	0.00132057	0.0573118	-0.997464	PG1_0-PG1_GMTP
ENSMUSG00000039013.16	Siglecf	0.316552	3.18733	4.12291	0.00132359	0.0573118	-0.884204	PG1_0-PG1_GMTP
ENSMUSG00000078519.3	2310026L22Rik	1.59623	-2.95726	4.12124	0.00132761	0.0573118	-1.63701	PG1_0-PG1_GMTP
ENSMUSG00000029406.15	Pitpnm2	0.539123	0.969728	4.12111	0.00132793	0.0573118	-0.752839	PG1_0-PG1_GMTP
ENSMUSG00000040945.13	Rcc2	-0.213038	6.87959	-4.11435	0.00134437	0.0578299	-1.14519	PG1_0-PG1_GMTP
ENSMUSG00000040264.10	Gbp2b	-1.5614	0.117783	-4.11404	0.00134512	0.0578299	-0.80913	PG1_0-PG1_GMTP
ENSMUSG00000026875.14	Traf1	-0.493056	3.66306	-4.11258	0.00134872	0.0578424	-0.95661	PG1_0-PG1_GMTP
ENSMUSG00000082070.1	Gm1866	-1.58531	-3.87857	-4.11181	0.0013506	0.0578424	-2.06228	PG1_0-PG1_GMTP
ENSMUSG00000070858.12	Gm1673	0.557994	0.756154	4.10714	0.00136214	0.0582249	-0.780067	PG1_0-PG1_GMTP
ENSMUSG00000030677.8	Kif22	-0.363933	3.06008	-4.09954	0.00138114	0.0587005	-0.91136	PG1_0-PG1_GMTP
ENSMUSG00000030088.15	Aldh1l1	-0.302426	4.45457	-4.09842	0.00138396	0.0587005	-1.06056	PG1_0-PG1_GMTP
ENSMUSG00000015340.10	Cybb	-0.274575	11.4773	-4.09807	0.00138484	0.0587005	-1.20716	PG1_0-PG1_GMTP
ENSMUSG00000026112.7	Coa5	-0.212363	7.5361	-4.09782	0.00138548	0.0587005	-1.18927	PG1_0-PG1_GMTP
ENSMUSG00000022114.5	Spry2	0.343671	2.61715	4.09745	0.00138642	0.0587005	-0.868779	PG1_0-PG1_GMTP
ENSMUSG00000002602.16	Axl	-0.22883	7.60017	-4.09374	0.00139582	0.0589867	-1.19787	PG1_0-PG1_GMTP
ENSMUSG00000023913.17	Pla2g7	-0.222389	8.34642	-4.09184	0.00140068	0.05908	-1.21205	PG1_0-PG1_GMTP
ENSMUSG00000024613.16	Tcof1	-0.244179	6.00167	-4.09039	0.00140438	0.0591242	-1.1628	PG1_0-PG1_GMTP
ENSMUSG00000030103.11	Bhlhe40	0.291007	6.03653	4.08851	0.00140919	0.059215	-1.16749	PG1_0-PG1_GMTP
ENSMUSG00000021277.16	Traf3	-0.281967	5.30351	-4.08617	0.00141522	0.0592809	-1.14006	PG1_0-PG1_GMTP
ENSMUSG00000031015.8	Swap70	-0.201373	6.50328	-4.08584	0.00141607	0.0592809	-1.1873	PG1_0-PG1_GMTP
ENSMUSG00000028793.15	Rnf19b	-0.261683	7.22416	-4.08253	0.00142465	0.0595285	-1.21112	PG1_0-PG1_GMTP
ENSMUSG00000022180.7	Slc7a8	-0.218763	6.55179	-4.0707	0.00145574	0.060714	-1.21634	PG1_0-PG1_GMTP
ENSMUSG00000017897.18	Eya2	3.30892	-4.01447	4.06481	0.00147149	0.0611889	-2.14959	PG1_0-PG1_GMTP
ENSMUSG00000026946.9	Nmi	-0.330857	5.27095	-4.06439	0.00147262	0.0611889	-1.178	PG1_0-PG1_GMTP
ENSMUSG00000022901.13	Cd86	-0.405851	3.81804	-4.06037	0.00148347	0.0614626	-1.06717	PG1_0-PG1_GMTP
ENSMUSG00000030161.8	Gabarapl1	0.215845	7.01521	4.05991	0.00148471	0.0614626	-1.24794	PG1_0-PG1_GMTP
ENSMUSG00000010175.13	Prox1	2.40006	-4.14127	4.05193	0.00150653	0.0621514	-2.20377	PG1_0-PG1_GMTP
ENSMUSG00000020134.13	Peli1	-0.225268	5.75381	-4.0508	0.00150962	0.0621514	-1.22544	PG1_0-PG1_GMTP
ENSMUSG00000027329.9	Spef1	-0.387831	2.23048	-4.05077	0.00150971	0.0621514	-0.915803	PG1_0-PG1_GMTP
ENSMUSG00000092233.1	Gm20403	-3.12264	-6.4975	-4.04543	0.00152453	0.0625325	-2.87289	PG1_0-PG1_GMTP
ENSMUSG00000044701.5	Il27	-0.913304	0.292629	-4.04541	0.00152457	0.0625325	-0.900384	PG1_0-PG1_GMTP
ENSMUSG00000036594.15	H2-Aa	-0.226987	10.1756	-4.03863	0.00154359	0.0630251	-1.31954	PG1_0-PG1_GMTP
ENSMUSG00000117939.1	Gm9067	-3.58896	-6.66723	-4.03836	0.00154435	0.0630251	-2.91481	PG1_0-PG1_GMTP
ENSMUSG00000017652.16	Cd40	-0.590502	3.60714	-4.03811	0.00154505	0.0630251	-1.08373	PG1_0-PG1_GMTP
ENSMUSG00000027641.13	Rbl1	-0.306603	5.33682	-4.03488	0.00155421	0.063283	-1.2353	PG1_0-PG1_GMTP
ENSMUSG00000030223.14	Ptpro	-0.18177	7.20854	-4.03204	0.0015623	0.0634832	-1.30327	PG1_0-PG1_GMTP
ENSMUSG00000103625.1	Gm37357	-3.84359	-6.79623	-4.03117	0.00156482	0.0634832	-2.94662	PG1_0-PG1_GMTP
ENSMUSG00000027859.10	Ngf	2.79683	-4.53784	4.0299	0.00156843	0.0635144	-2.3496	PG1_0-PG1_GMTP
ENSMUSG00000022661.14	Cd200	0.319529	4.53041	4.02731	0.00157588	0.0637005	-1.19588	PG1_0-PG1_GMTP
ENSMUSG00000055782.9	Abcd2	0.276814	5.54887	4.02457	0.00158382	0.0639054	-1.26443	PG1_0-PG1_GMTP
ENSMUSG00000020914.17	Top2a	-0.387416	5.49954	-4.02018	0.0015966	0.0643051	-1.27013	PG1_0-PG1_GMTP
ENSMUSG00000030847.8	Bag3	0.188685	5.90696	4.01828	0.00160215	0.0643099	-1.29099	PG1_0-PG1_GMTP
ENSMUSG00000001542.7	Ell2	-0.280173	6.92741	-4.01817	0.00160249	0.0643099	-1.32238	PG1_0-PG1_GMTP
ENSMUSG00000002944.15	Cd36	0.252007	9.31438	4.01694	0.00160611	0.0643394	-1.35724	PG1_0-PG1_GMTP
ENSMUSG00000042901.10	Aida	-0.21141	6.58489	-4.01513	0.00161143	0.0643696	-1.319	PG1_0-PG1_GMTP
ENSMUSG00000066684.10	Pilrb1	-0.56719	2.11601	-4.01378	0.00161542	0.0643696	-0.970853	PG1_0-PG1_GMTP
ENSMUSG00000060890.11	Arr3	3.15743	-7.12686	4.01375	0.00161552	0.0643696	-3.02336	PG1_0-PG1_GMTP
ENSMUSG00000112926.1	Gm7172	-2.27476	-7.17928	-4.00812	0.00163224	0.0649199	-3.03633	PG1_0-PG1_GMTP
ENSMUSG00000018899.16	Irf1	-0.293164	6.69069	-4.00563	0.00163971	0.0651013	-1.33934	PG1_0-PG1_GMTP
ENSMUSG00000113596.1	Gm48452	-3.84999	-6.2654	-4.0043	0.00164372	0.0651445	-2.83985	PG1_0-PG1_GMTP
ENSMUSG00000021025.8	Nfkbia	-0.366487	5.73379	-3.99586	0.00166933	0.0659414	-1.32505	PG1_0-PG1_GMTP
ENSMUSG00000011257.19	Pabpc4	0.257317	5.24844	3.99573	0.00166974	0.0659414	-1.30205	PG1_0-PG1_GMTP
ENSMUSG00000004707.14	Ly9	-0.186105	9.23191	-3.98934	0.00168941	0.0665547	-1.40755	PG1_0-PG1_GMTP
ENSMUSG00000106169.1	Mir6948	-2.52151	-6.36464	-3.98875	0.00169124	0.0665547	-2.87134	PG1_0-PG1_GMTP
ENSMUSG00000018986.10	Slfn3	-0.691622	4.32338	-3.98661	0.00169788	0.0666985	-1.25165	PG1_0-PG1_GMTP
ENSMUSG00000039699.14	Batf2	-0.486421	3.3267	-3.98384	0.00170653	0.0669207	-1.14792	PG1_0-PG1_GMTP
ENSMUSG00000033871.14	Ppargc1b	-0.540827	2.45495	-3.98224	0.00171155	0.0669998	-1.05451	PG1_0-PG1_GMTP
ENSMUSG00000022240.10	Ctnnd2	-1.03497	-0.773806	-3.96949	0.00175208	0.0684662	-1.14324	PG1_0-PG1_GMTP
ENSMUSG00000103948.1	4930594C11Rik	3.03692	-6.70271	3.96766	0.00175795	0.0685755	-2.9576	PG1_0-PG1_GMTP
ENSMUSG00000029781.7	Fkbp9	0.203695	4.06328	3.96339	0.0017718	0.0689211	-1.26829	PG1_0-PG1_GMTP
ENSMUSG00000070348.5	Ccnd1	-0.358824	4.92799	-3.96303	0.00177299	0.0689211	-1.34261	PG1_0-PG1_GMTP
ENSMUSG00000104822.1	Gm42967	2.0183	-4.28517	3.96017	0.0017823	0.0691626	-2.32052	PG1_0-PG1_GMTP
ENSMUSG00000108584.1	Gm45216	-2.97574	-6.36599	-3.95113	0.00181216	0.0701991	-2.89141	PG1_0-PG1_GMTP
ENSMUSG00000026425.15	Srgap2	-0.279659	7.66539	-3.94981	0.00181657	0.0702481	-1.46317	PG1_0-PG1_GMTP
ENSMUSG00000025203.6	Scd2	-0.287794	6.36167	-3.94725	0.00182511	0.0703676	-1.43695	PG1_0-PG1_GMTP
ENSMUSG00000030609.18	Aen	-0.257446	4.05411	-3.947	0.00182597	0.0703676	-1.29704	PG1_0-PG1_GMTP
ENSMUSG00000034116.17	Vav1	-0.180919	8.19218	-3.94112	0.00184582	0.0709188	-1.48705	PG1_0-PG1_GMTP
ENSMUSG00000001156.9	Mxd1	-0.239205	4.96622	-3.94088	0.00184663	0.0709188	-1.3856	PG1_0-PG1_GMTP
ENSMUSG00000099398.1	Ms4a14	-0.392772	5.54164	-3.93974	0.00185049	0.070945	-1.41933	PG1_0-PG1_GMTP
ENSMUSG00000057219.11	Armc7	-0.210649	5.41854	-3.93245	0.00187546	0.0717788	-1.42678	PG1_0-PG1_GMTP
ENSMUSG00000034981.9	Parm1	-3.3925	-6.21973	-3.93108	0.00188021	0.0718377	-2.86836	PG1_0-PG1_GMTP
ENSMUSG00000034652.12	Cd300a	0.186241	8.40847	3.92993	0.00188418	0.0718663	-1.51024	PG1_0-PG1_GMTP
ENSMUSG00000037962.7	Rflna	3.48384	-6.90895	3.92727	0.00189341	0.072095	-3.02057	PG1_0-PG1_GMTP
ENSMUSG00000039735.16	Fnbp1l	-0.325977	6.49803	-3.92218	0.00191125	0.0726502	-1.4872	PG1_0-PG1_GMTP
ENSMUSG00000031897.9	Psmb10	-0.349322	7.39216	-3.91916	0.00192191	0.0728823	-1.51453	PG1_0-PG1_GMTP
ENSMUSG00000099413.1	Gm17767	-1.67232	-1.82942	-3.91775	0.00192688	0.0728823	-1.45504	PG1_0-PG1_GMTP
ENSMUSG00000029470.15	P2rx4	-0.181675	9.0568	-3.91683	0.00193015	0.0728823	-1.54008	PG1_0-PG1_GMTP
ENSMUSG00000022867.11	Usp25	-0.273893	7.51399	-3.91675	0.00193042	0.0728823	-1.52131	PG1_0-PG1_GMTP
ENSMUSG00000110291.1	Gm37419	-2.88832	-4.32588	-3.91092	0.00195125	0.0735003	-2.37045	PG1_0-PG1_GMTP
ENSMUSG00000081406.4	Rps6-ps4	0.351955	2.84296	3.90948	0.00195645	0.0735003	-1.22369	PG1_0-PG1_GMTP
ENSMUSG00000055809.7	Dnaaf3	-0.528957	3.1213	-3.90942	0.00195667	0.0735003	-1.25641	PG1_0-PG1_GMTP
ENSMUSG00000020042.15	Btbd11	-0.44148	2.63655	-3.8994	0.00199311	0.0747434	-1.21855	PG1_0-PG1_GMTP
ENSMUSG00000087206.1	Gm16175	-2.96093	-6.37071	-3.89816	0.00199768	0.0747564	-2.92058	PG1_0-PG1_GMTP
ENSMUSG00000000385.8	Tmprss2	-4.05606	-5.18858	-3.89748	0.00200016	0.0747564	-2.62879	PG1_0-PG1_GMTP
ENSMUSG00000026749.11	Nek6	0.273378	5.27788	3.89331	0.00201558	0.075107	-1.49112	PG1_0-PG1_GMTP
ENSMUSG00000031274.16	Col4a5	-0.479362	2.38206	-3.89313	0.00201627	0.075107	-1.20349	PG1_0-PG1_GMTP
ENSMUSG00000028494.12	Plin2	0.19452	10.1093	3.88984	0.00202852	0.0754373	-1.59355	PG1_0-PG1_GMTP
ENSMUSG00000043895.6	S1pr2	-0.189085	7.42403	-3.88545	0.00204503	0.075874	-1.57729	PG1_0-PG1_GMTP
ENSMUSG00000038264.8	Sema7a	1.06093	-0.172022	3.88407	0.00205022	0.075874	-1.18652	PG1_0-PG1_GMTP
ENSMUSG00000065883.2	Gm22865	2.61053	-6.93776	3.88401	0.00205047	0.075874	-3.04751	PG1_0-PG1_GMTP
ENSMUSG00000117527.1	Gm50058	2.00263	-7.01656	3.87957	0.00206731	0.0763707	-3.06518	PG1_0-PG1_GMTP
ENSMUSG00000047098.18	Rnf31	-0.240887	6.02215	-3.87555	0.00208268	0.0767496	-1.55726	PG1_0-PG1_GMTP
ENSMUSG00000031652.11	N4bp1	-0.260214	6.38146	-3.87433	0.00208737	0.0767496	-1.57169	PG1_0-PG1_GMTP
ENSMUSG00000032018.14	Sc5d	-0.235742	5.31597	-3.8742	0.00208789	0.0767496	-1.52828	PG1_0-PG1_GMTP
ENSMUSG00000024079.4	Eif2ak2	-0.39319	6.76141	-3.87025	0.00210317	0.0771843	-1.59016	PG1_0-PG1_GMTP
ENSMUSG00000040705.2	A930016O22Rik	-2.51346	-6.75385	-3.85997	0.00214345	0.0785332	-3.02246	PG1_0-PG1_GMTP
ENSMUSG00000029321.1	Slc10a6	-3.58889	-6.73514	-3.8577	0.00215245	0.0787337	-3.01978	PG1_0-PG1_GMTP
ENSMUSG00000001435.15	Col18a1	-0.24421	5.46142	-3.85667	0.00215651	0.0787532	-1.56796	PG1_0-PG1_GMTP
ENSMUSG00000022346.16	Myc	0.392341	2.0241	3.84828	0.00219018	0.0798521	-1.24987	PG1_0-PG1_GMTP
ENSMUSG00000015656.17	Hspa8	-0.162921	10.4694	-3.84686	0.00219595	0.0799319	-1.67288	PG1_0-PG1_GMTP
ENSMUSG00000046916.9	Myct1	3.48086	-5.49416	3.84174	0.00221681	0.0805596	-2.74406	PG1_0-PG1_GMTP
ENSMUSG00000071573.14	Rnls	0.396973	1.83674	3.83823	0.00223124	0.0809523	-1.25312	PG1_0-PG1_GMTP
ENSMUSG00000073421.6	H2-Ab1	-0.267426	10.4465	-3.83578	0.00224137	0.0810404	-1.69339	PG1_0-PG1_GMTP
ENSMUSG00000072889.9	Nfxl1	-0.294648	5.54948	-3.83497	0.00224472	0.0810404	-1.61211	PG1_0-PG1_GMTP
ENSMUSG00000020140.15	Lgr5	3.03486	-7.35789	3.83452	0.00224659	0.0810404	-3.1499	PG1_0-PG1_GMTP
ENSMUSG00000022747.17	St3gal6	-0.500797	0.774945	-3.8334	0.00225126	0.0810404	-1.22242	PG1_0-PG1_GMTP
ENSMUSG00000090327.1	Gm17111	1.22722	-2.58203	3.83275	0.00225397	0.0810404	-1.78888	PG1_0-PG1_GMTP
ENSMUSG00000011008.13	Mcoln2	-0.253775	5.92847	-3.83239	0.00225546	0.0810404	-1.63314	PG1_0-PG1_GMTP
ENSMUSG00000047415.12	Gpr68	-0.248645	3.91116	-3.82459	0.00228821	0.0820849	-1.50392	PG1_0-PG1_GMTP
ENSMUSG00000027330.16	Cdc25b	-0.250269	4.83881	-3.81714	0.00231996	0.0829737	-1.60342	PG1_0-PG1_GMTP
ENSMUSG00000049422.7	Chchd10	-0.54013	1.60272	-3.81703	0.00232042	0.0829737	-1.27441	PG1_0-PG1_GMTP
ENSMUSG00000099757.1	BE692007	-0.303191	4.41412	-3.81604	0.00232466	0.0829921	-1.57076	PG1_0-PG1_GMTP
ENSMUSG00000044340.7	Phlpp1	-0.229048	6.28444	-3.81331	0.00233645	0.0832231	-1.68108	PG1_0-PG1_GMTP
ENSMUSG00000096988.1	A930029G22Rik	4.21459	-5.7853	3.81217	0.00234138	0.0832231	-2.83359	PG1_0-PG1_GMTP
ENSMUSG00000111971.1	Gm48678	2.3828	-4.45481	3.81195	0.00234232	0.0832231	-2.48355	PG1_0-PG1_GMTP
ENSMUSG00000033316.14	Galnt9	0.318734	3.76652	3.80977	0.00235178	0.0834266	-1.51431	PG1_0-PG1_GMTP
ENSMUSG00000021965.3	Ska3	-0.663452	1.3285	-3.80841	0.00235772	0.0835045	-1.27539	PG1_0-PG1_GMTP
ENSMUSG00000047735.14	Samd9l	-0.42265	7.73788	-3.80408	0.00237671	0.0840437	-1.73331	PG1_0-PG1_GMTP
ENSMUSG00000032915.6	Adgre4	-0.570415	2.39648	-3.80222	0.00238488	0.0841365	-1.36452	PG1_0-PG1_GMTP
ENSMUSG00000108910.1	Gm44625	-3.12279	-7.33774	-3.80168	0.00238727	0.0841365	-3.16173	PG1_0-PG1_GMTP
ENSMUSG00000085912.2	Trp53cor1	-0.756444	0.240285	-3.80092	0.00239065	0.0841365	-1.28633	PG1_0-PG1_GMTP
ENSMUSG00000027366.12	Sppl2a	-0.236234	8.52875	-3.79803	0.00240343	0.0844532	-1.75514	PG1_0-PG1_GMTP
ENSMUSG00000092564.2	BC051226	-0.37646	3.14254	-3.78962	0.00244118	0.0856447	-1.47367	PG1_0-PG1_GMTP
ENSMUSG00000007987.12	Ift22	-0.206537	5.58273	-3.78811	0.00244802	0.0857498	-1.69996	PG1_0-PG1_GMTP
ENSMUSG00000038884.14	Shfl	-0.376489	2.67819	-3.78437	0.00246502	0.0862101	-1.42686	PG1_0-PG1_GMTP
ENSMUSG00000065208.1	Gm24616	2.69118	-5.34447	3.78004	0.0024849	0.0867241	-2.74561	PG1_0-PG1_GMTP
ENSMUSG00000022057.8	Adamdec1	-2.97449	-7.11136	-3.77947	0.00248749	0.0867241	-3.13178	PG1_0-PG1_GMTP
ENSMUSG00000023307.14	Marchf5	-0.205348	6.5689	-3.77773	0.00249552	0.0868682	-1.75553	PG1_0-PG1_GMTP
ENSMUSG00000029477.14	Morn3	2.23034	-5.99338	3.77402	0.00251274	0.0873315	-2.90462	PG1_0-PG1_GMTP
ENSMUSG00000034612.7	Chst11	0.277623	4.51216	3.76377	0.00256096	0.0888689	-1.67537	PG1_0-PG1_GMTP
ENSMUSG00000044629.5	Cnrip1	0.443866	3.29251	3.7551	0.00260248	0.0899818	-1.55478	PG1_0-PG1_GMTP
ENSMUSG00000097239.7	Gm27029	2.61344	-6.24886	3.75427	0.00260645	0.0899818	-2.97255	PG1_0-PG1_GMTP
ENSMUSG00000037419.9	Endod1	-0.195983	5.67838	-3.75389	0.00260831	0.0899818	-1.76741	PG1_0-PG1_GMTP
ENSMUSG00000070166.1	Gm25821	3.49054	-5.31347	3.75371	0.00260916	0.0899818	-2.75503	PG1_0-PG1_GMTP
ENSMUSG00000038612.16	Mcl1	-0.169644	10.1335	-3.74837	0.00263515	0.0907379	-1.85536	PG1_0-PG1_GMTP
ENSMUSG00000064345.1	mt-Nd2	0.259145	8.20917	3.74433	0.00265499	0.0912802	-1.85091	PG1_0-PG1_GMTP
ENSMUSG00000039621.13	Prex1	-0.228989	8.70031	-3.74162	0.00266836	0.0915926	-1.86131	PG1_0-PG1_GMTP
ENSMUSG00000001630.13	Stk38l	-0.350386	3.42848	-3.74076	0.00267263	0.0915926	-1.59812	PG1_0-PG1_GMTP
ENSMUSG00000064341.1	mt-Nd1	0.248096	9.09199	3.73931	0.00267985	0.0915926	-1.86867	PG1_0-PG1_GMTP
ENSMUSG00000020668.10	Kif3c	-0.261107	4.92707	-3.73918	0.0026805	0.0915926	-1.75292	PG1_0-PG1_GMTP
ENSMUSG00000055172.10	C1ra	-0.51807	2.81096	-3.73672	0.00269275	0.0918705	-1.52747	PG1_0-PG1_GMTP
ENSMUSG00000108155.1	Gm44443	-2.69202	-6.90365	-3.73491	0.00270179	0.0920381	-3.11542	PG1_0-PG1_GMTP
ENSMUSG00000028756.12	Pink1	0.243579	6.52574	3.73374	0.0027077	0.092099	-1.8356	PG1_0-PG1_GMTP
ENSMUSG00000060802.8	B2m	-0.197073	12.0592	-3.73191	0.00271687	0.0922703	-1.87873	PG1_0-PG1_GMTP
ENSMUSG00000020181.18	Nav3	-4.18938	-5.28656	-3.73007	0.0027262	0.0924465	-2.76392	PG1_0-PG1_GMTP
ENSMUSG00000019961.17	Tmpo	-0.212787	6.21835	-3.72887	0.00273227	0.0925117	-1.83478	PG1_0-PG1_GMTP
ENSMUSG00000058258.14	Idi1	-0.295839	3.3571	-3.72515	0.00275123	0.0930125	-1.61713	PG1_0-PG1_GMTP
ENSMUSG00000036181.2	H1f2	0.284691	5.79263	3.72229	0.00276587	0.093313	-1.83072	PG1_0-PG1_GMTP
ENSMUSG00000039678.12	Tbc1d13	-0.175121	7.66028	-3.72178	0.00276848	0.093313	-1.8843	PG1_0-PG1_GMTP
ENSMUSG00000038296.14	Galnt18	-3.74472	-6.04333	-3.71734	0.00279142	0.0939442	-2.94891	PG1_0-PG1_GMTP
ENSMUSG00000041075.8	Fzd7	0.257148	5.4514	3.71435	0.00280698	0.0943216	-1.82956	PG1_0-PG1_GMTP
ENSMUSG00000025225.15	Nfkb2	-0.256147	6.28371	-3.71356	0.00281109	0.0943216	-1.8653	PG1_0-PG1_GMTP
ENSMUSG00000055541.17	Lair1	-0.188731	7.73012	-3.71017	0.00282886	0.0947754	-1.90705	PG1_0-PG1_GMTP
ENSMUSG00000026942.13	Traf2	-0.26679	4.76609	-3.70801	0.00284021	0.0948335	-1.79854	PG1_0-PG1_GMTP
ENSMUSG00000038712.16	Mindy1	0.208063	6.5626	3.70781	0.0028413	0.0948335	-1.88465	PG1_0-PG1_GMTP
ENSMUSG00000032643.12	Fhl3	-0.196294	6.10347	-3.70742	0.00284335	0.0948335	-1.87037	PG1_0-PG1_GMTP
ENSMUSG00000050565.16	Tor1aip2	-0.209541	7.61602	-3.69792	0.00289399	0.0962879	-1.92773	PG1_0-PG1_GMTP
ENSMUSG00000094076.7	Gm4767	2.8547	-6.18248	3.69713	0.00289824	0.0962879	-2.9908	PG1_0-PG1_GMTP
ENSMUSG00000052160.7	Pld4	-0.204487	9.58874	-3.69682	0.0028999	0.0962879	-1.94992	PG1_0-PG1_GMTP
ENSMUSG00000033885.15	Pxk	-0.201698	5.55596	-3.69575	0.0029057	0.0963372	-1.86904	PG1_0-PG1_GMTP
ENSMUSG00000020493.8	Prr11	-0.42188	2.69639	-3.69315	0.0029198	0.0966609	-1.5913	PG1_0-PG1_GMTP
ENSMUSG00000103726.1	Gm30074	-1.50382	-3.09324	-3.68809	0.00294738	0.0971588	-2.12165	PG1_0-PG1_GMTP
ENSMUSG00000022816.11	Fstl1	0.290115	2.9519	3.68772	0.00294943	0.0971588	-1.63264	PG1_0-PG1_GMTP
ENSMUSG00000022010.19	Tsc22d1	0.202219	6.04294	3.68753	0.00295045	0.0971588	-1.90494	PG1_0-PG1_GMTP
ENSMUSG00000051323.16	Pcdh19	-1.14608	-1.86735	-3.6872	0.00295226	0.0971588	-1.75241	PG1_0-PG1_GMTP
ENSMUSG00000058873.1	Gm5582	4.15685	-6.24898	3.68455	0.00296684	0.097417	-3.01205	PG1_0-PG1_GMTP
ENSMUSG00000019990.15	Pde7b	-0.267462	5.36155	-3.68419	0.00296883	0.097417	-1.88056	PG1_0-PG1_GMTP
ENSMUSG00000057835.7	Zfp119a	-0.431514	1.56067	-3.68113	0.00298581	0.0977028	-1.50425	PG1_0-PG1_GMTP
ENSMUSG00000114608.1	Gm36161	-0.255744	6.3935	-3.68061	0.0029887	0.0977028	-1.92982	PG1_0-PG1_GMTP
ENSMUSG00000027602.9	Map1lc3a	0.23724	4.42793	3.68025	0.00299068	0.0977028	-1.82086	PG1_0-PG1_GMTP
ENSMUSG00000057522.15	Spop	-0.170797	8.01734	-3.67615	0.00301357	0.0983068	-1.97468	PG1_0-PG1_GMTP
ENSMUSG00000027018.11	Hat1	-0.191182	5.40297	-3.67271	0.00303293	0.0987939	-1.90396	PG1_0-PG1_GMTP
ENSMUSG00000053318.7	Slamf8	-0.288186	7.00633	-3.66992	0.00304873	0.0991638	-1.9667	PG1_0-PG1_GMTP
ENSMUSG00000039462.4	Col10a1	3.21727	-6.16513	3.66363	0.00308465	0.100186	-3.00648	PG1_0-PG1_GMTP
ENSMUSG00000032402.12	Smad3	-0.235992	4.06635	-3.66126	0.00309828	0.100355	-1.81911	PG1_0-PG1_GMTP
ENSMUSG00000038298.14	Pdzk1	3.21971	-3.78041	3.66116	0.00309886	0.100355	-2.4014	PG1_0-PG1_GMTP
ENSMUSG00000049288.4	Lix1l	0.225453	5.0443	3.65714	0.00312216	0.100377	-1.91171	PG1_0-PG1_GMTP
ENSMUSG00000051378.10	Kif18b	-0.575844	1.80279	-3.65638	0.00312659	0.100377	-1.56468	PG1_0-PG1_GMTP
ENSMUSG00000001281.10	Itgb7	-0.28006	5.67436	-3.65438	0.00313826	0.100377	-1.951	PG1_0-PG1_GMTP
ENSMUSG00000085436.1	Zfp335os	-1.05057	-1.23712	-3.65375	0.00314192	0.100377	-1.66551	PG1_0-PG1_GMTP
ENSMUSG00000054520.15	Sh3bp2	-0.171478	7.9119	-3.65329	0.00314458	0.100377	-2.01549	PG1_0-PG1_GMTP
ENSMUSG00000024989.15	Cep55	-0.42496	2.49303	-3.65289	0.00314696	0.100377	-1.63888	PG1_0-PG1_GMTP
ENSMUSG00000038417.4	Fig4	0.17174	5.67266	3.65289	0.00314696	0.100377	-1.95367	PG1_0-PG1_GMTP
ENSMUSG00000058290.4	Espl1	-0.500393	2.93431	-3.65285	0.00314719	0.100377	-1.69296	PG1_0-PG1_GMTP
ENSMUSG00000010044.12	Zmynd10	-2.40384	-4.18141	-3.65285	0.00314721	0.100377	-2.52977	PG1_0-PG1_GMTP
ENSMUSG00000032508.8	Myd88	-0.188502	6.41393	-3.65263	0.00314845	0.100377	-1.98227	PG1_0-PG1_GMTP
ENSMUSG00000003123.15	Lipe	-0.22825	4.64974	-3.65254	0.00314901	0.100377	-1.89124	PG1_0-PG1_GMTP
ENSMUSG00000053263.3	Gm12592	-2.56984	-3.39623	-3.65008	0.00316347	0.100694	-2.27019	PG1_0-PG1_GMTP
ENSMUSG00000024672.11	Ms4a7	-0.203565	9.36281	-3.64631	0.00318577	0.101228	-2.04278	PG1_0-PG1_GMTP
ENSMUSG00000020827.18	Mink1	-0.202593	7.50064	-3.64571	0.00318933	0.101228	-2.02238	PG1_0-PG1_GMTP
ENSMUSG00000024013.15	Fgd2	-0.274267	5.95368	-3.64402	0.00319936	0.101402	-1.98195	PG1_0-PG1_GMTP
ENSMUSG00000024339.12	Tap2	-0.279517	6.11006	-3.63901	0.00322941	0.102073	-1.99718	PG1_0-PG1_GMTP
ENSMUSG00000029782.20	Tmem209	-0.204508	4.79772	-3.63808	0.00323498	0.102073	-1.92964	PG1_0-PG1_GMTP
ENSMUSG00000050304.4	Slc25a2	2.69832	-4.36573	3.63758	0.00323798	0.102073	-2.59278	PG1_0-PG1_GMTP
ENSMUSG00000040229.11	Gpr34	0.671921	0.944663	3.63744	0.00323882	0.102073	-1.54832	PG1_0-PG1_GMTP
ENSMUSG00000030830.18	Itgal	-0.258651	7.72256	-3.63477	0.00325503	0.102439	-2.04677	PG1_0-PG1_GMTP
ENSMUSG00000062995.12	Ica1	0.495548	1.01235	3.63348	0.00326282	0.10254	-1.55715	PG1_0-PG1_GMTP
ENSMUSG00000058818.13	Pirb	-0.152291	9.14727	-3.63044	0.00328138	0.102728	-2.07107	PG1_0-PG1_GMTP
ENSMUSG00000006205.13	Htra1	-0.333442	2.71396	-3.62969	0.00328596	0.102728	-1.70668	PG1_0-PG1_GMTP
ENSMUSG00000040093.16	Bmf	-0.226863	5.36412	-3.62968	0.00328606	0.102728	-1.98136	PG1_0-PG1_GMTP
ENSMUSG00000021758.14	Ddx4	-1.1137	-0.250976	-3.62949	0.00328723	0.102728	-1.58098	PG1_0-PG1_GMTP
ENSMUSG00000042228.14	Lyn	-0.147051	7.8285	-3.62807	0.00329589	0.102855	-2.06098	PG1_0-PG1_GMTP
ENSMUSG00000002983.17	Relb	-0.319688	5.22293	-3.62396	0.00332124	0.103501	-1.98393	PG1_0-PG1_GMTP
ENSMUSG00000090610.3	Gm3571	-1.86849	-3.01097	-3.62248	0.00333042	0.103643	-2.1603	PG1_0-PG1_GMTP
ENSMUSG00000034570.12	Inpp5j	-0.375764	3.40026	-3.62064	0.00334187	0.103854	-1.81205	PG1_0-PG1_GMTP
ENSMUSG00000026814.16	Eng	-0.21673	6.56787	-3.61927	0.00335042	0.103872	-2.04878	PG1_0-PG1_GMTP
ENSMUSG00000010067.13	Rassf1	-0.320504	4.67912	-3.61906	0.00335175	0.103872	-1.95533	PG1_0-PG1_GMTP
ENSMUSG00000062031.13	Pgghg	-0.251211	4.63048	-3.61644	0.00336815	0.104182	-1.95605	PG1_0-PG1_GMTP
ENSMUSG00000030309.16	Caprin2	0.453277	1.65683	3.61597	0.0033711	0.104182	-1.62309	PG1_0-PG1_GMTP
ENSMUSG00000032174.5	Icam5	1.19766	-1.76281	3.61205	0.00339583	0.104801	-1.82412	PG1_0-PG1_GMTP
ENSMUSG00000115070.1	Gm4740	2.79568	-6.51666	3.61045	0.003406	0.10484	-3.1077	PG1_0-PG1_GMTP
ENSMUSG00000029804.17	Herc3	-0.230307	4.16118	-3.60961	0.00341137	0.10484	-1.92392	PG1_0-PG1_GMTP
ENSMUSG00000040699.13	Limd2	-0.23904	6.98997	-3.6091	0.00341461	0.10484	-2.07908	PG1_0-PG1_GMTP
ENSMUSG00000019916.14	P4ha1	-0.182455	6.45845	-3.60796	0.00342185	0.10484	-2.06644	PG1_0-PG1_GMTP
ENSMUSG00000070942.8	Il1rl2	0.394046	2.4395	3.60753	0.00342463	0.10484	-1.71318	PG1_0-PG1_GMTP
ENSMUSG00000041736.7	Tspo	-0.274357	7.3121	-3.60742	0.00342529	0.10484	-2.08957	PG1_0-PG1_GMTP
ENSMUSG00000038644.14	Pold1	-0.176239	4.51163	-3.6063	0.00343245	0.104915	-1.96451	PG1_0-PG1_GMTP
ENSMUSG00000009614.16	Sardh	0.782362	0.525997	3.60553	0.0034374	0.104923	-1.59386	PG1_0-PG1_GMTP
ENSMUSG00000030142.10	Clec4e	-0.68493	5.08841	-3.60479	0.00344217	0.104925	-2.01109	PG1_0-PG1_GMTP
ENSMUSG00000022508.5	Bcl6	-0.174355	6.50671	-3.60403	0.00344702	0.10493	-2.07521	PG1_0-PG1_GMTP
ENSMUSG00000114761.1	Gm47242	-1.01685	2.30549	-3.59688	0.00349333	0.106194	-1.71697	PG1_0-PG1_GMTP
ENSMUSG00000026141.13	Col19a1	-1.4057	-1.77172	-3.59607	0.0034986	0.10621	-1.84664	PG1_0-PG1_GMTP
ENSMUSG00000032265.14	Tent5a	-0.227935	7.16863	-3.59381	0.00351341	0.106321	-2.11168	PG1_0-PG1_GMTP
ENSMUSG00000090737.1	Gm6788	-3.57294	-5.9364	-3.59306	0.00351833	0.106321	-3.00016	PG1_0-PG1_GMTP
ENSMUSG00000027350.8	Chgb	-3.99214	-5.37199	-3.59229	0.00352343	0.106321	-2.876	PG1_0-PG1_GMTP
ENSMUSG00000030102.11	Itpr1	-0.463513	5.36508	-3.59131	0.00352983	0.106321	-2.0523	PG1_0-PG1_GMTP
ENSMUSG00000026358.13	Rgs1	0.231003	6.04631	3.59082	0.0035331	0.106321	-2.08408	PG1_0-PG1_GMTP
ENSMUSG00000025940.6	Tmem70	0.193396	4.81321	3.59046	0.00353545	0.106321	-2.01856	PG1_0-PG1_GMTP
ENSMUSG00000110282.1	B930086L07Rik	3.25744	-6.16675	3.59041	0.00353579	0.106321	-3.04964	PG1_0-PG1_GMTP
ENSMUSG00000050075.8	Gpr171	1.65187	-3.94888	3.58972	0.00354036	0.106321	-2.51597	PG1_0-PG1_GMTP
ENSMUSG00000026829.9	Gbgt1	-0.586032	2.03553	-3.58891	0.00354571	0.106338	-1.70296	PG1_0-PG1_GMTP
ENSMUSG00000115615.1	Gm49200	2.61055	-7.24903	3.58736	0.003556	0.106504	-3.2508	PG1_0-PG1_GMTP
ENSMUSG00000028678.13	Kif2c	-0.446187	2.58785	-3.58273	0.00358687	0.107056	-1.7749	PG1_0-PG1_GMTP
ENSMUSG00000029776.11	Hibadh	0.197172	5.42596	3.58263	0.00358751	0.107056	-2.07157	PG1_0-PG1_GMTP
ENSMUSG00000022439.9	Parvg	-0.202132	5.16356	-3.58243	0.00358883	0.107056	-2.0571	PG1_0-PG1_GMTP
ENSMUSG00000090062.2	Galnt6os	1.17486	-2.67359	3.57842	0.00361587	0.107672	-2.09993	PG1_0-PG1_GMTP
ENSMUSG00000040298.6	Btbd16	-3.6531	-6.21188	-3.57792	0.00361923	0.107672	-3.06611	PG1_0-PG1_GMTP
ENSMUSG00000073902.5	Gm1966	-0.748348	2.40977	-3.57722	0.00362398	0.107672	-1.76351	PG1_0-PG1_GMTP
ENSMUSG00000115601.1	Gm49007	3.74789	-5.494	3.57602	0.00363211	0.10777	-2.91451	PG1_0-PG1_GMTP
ENSMUSG00000037995.15	Igsf9	-0.343384	2.7312	-3.57363	0.0036483	0.107992	-1.80907	PG1_0-PG1_GMTP
ENSMUSG00000017195.15	Zpbp2	3.48454	-5.14779	3.57349	0.00364926	0.107992	-2.83684	PG1_0-PG1_GMTP
ENSMUSG00000052783.16	Grk4	0.542829	0.847537	3.57209	0.00365882	0.108131	-1.65417	PG1_0-PG1_GMTP
ENSMUSG00000117446.1	Gm35551	-0.916362	-1.18514	-3.56948	0.00367675	0.108501	-1.77381	PG1_0-PG1_GMTP
ENSMUSG00000027808.8	Serp1	-0.156058	8.7118	-3.56885	0.00368106	0.108501	-2.18218	PG1_0-PG1_GMTP
ENSMUSG00000025089.15	Gfra1	2.79044	-4.91034	3.56752	0.00369023	0.108517	-2.78467	PG1_0-PG1_GMTP
ENSMUSG00000037759.6	Ptger2	0.349318	3.13788	3.56691	0.00369441	0.108517	-1.87435	PG1_0-PG1_GMTP
ENSMUSG00000073418.4	C4b	-1.07855	-0.956991	-3.56665	0.0036962	0.108517	-1.74516	PG1_0-PG1_GMTP
ENSMUSG00000018672.15	Copz2	0.369216	2.49479	3.56453	0.00371087	0.108805	-1.79601	PG1_0-PG1_GMTP
ENSMUSG00000021071.17	Trim9	-2.46833	-6.85192	-3.56087	0.00373635	0.109408	-3.19675	PG1_0-PG1_GMTP
ENSMUSG00000011118.4	Panx3	2.79089	-7.06355	3.55913	0.00374853	0.10953	-3.23427	PG1_0-PG1_GMTP
ENSMUSG00000029915.14	Clec5a	-0.250517	4.93402	-3.55887	0.00375031	0.10953	-2.08569	PG1_0-PG1_GMTP
ENSMUSG00000022048.8	Dpysl2	-0.292652	6.2134	-3.55437	0.003782	0.110122	-2.15768	PG1_0-PG1_GMTP
ENSMUSG00000097445.1	Gm26631	-1.49491	-2.54648	-3.55413	0.0037837	0.110122	-2.09048	PG1_0-PG1_GMTP
ENSMUSG00000029490.4	Mfsd7a	-0.357077	4.28212	-3.55324	0.00379002	0.110122	-2.04006	PG1_0-PG1_GMTP
ENSMUSG00000025357.8	Dgka	0.286805	3.61208	3.55319	0.00379035	0.110122	-1.96244	PG1_0-PG1_GMTP
ENSMUSG00000004446.12	Bid	-0.206187	5.24184	-3.55043	0.00381	0.110549	-2.1209	PG1_0-PG1_GMTP
ENSMUSG00000068114.7	Ccdc134	-0.303188	2.94632	-3.54435	0.0038535	0.111666	-1.88955	PG1_0-PG1_GMTP
ENSMUSG00000030671.9	Pde3b	0.615752	3.08412	3.54173	0.00387247	0.11206	-1.91264	PG1_0-PG1_GMTP
ENSMUSG00000049659.15	Aftph	-0.189223	7.16556	-3.54108	0.00387713	0.11206	-2.2095	PG1_0-PG1_GMTP
ENSMUSG00000060586.11	H2-Eb1	-0.252606	10.0097	-3.53819	0.00389815	0.112495	-2.24567	PG1_0-PG1_GMTP
ENSMUSG00000021583.7	Erap1	-0.273301	7.06578	-3.53763	0.00390224	0.112495	-2.21357	PG1_0-PG1_GMTP
ENSMUSG00000118184.1	Gm50144	3.62648	-7.10926	3.53444	0.00392563	0.113023	-3.25464	PG1_0-PG1_GMTP
ENSMUSG00000042406.8	Atf4	-0.220957	6.72205	-3.53065	0.00395355	0.11368	-2.21762	PG1_0-PG1_GMTP
ENSMUSG00000080717.10	B230307C23Rik	-0.360702	1.94353	-3.52905	0.00396538	0.113867	-1.7988	PG1_0-PG1_GMTP
ENSMUSG00000026773.19	Pfkfb3	-0.218872	6.26324	-3.52839	0.00397026	0.113867	-2.2076	PG1_0-PG1_GMTP
ENSMUSG00000000247.11	Lhx2	-0.79872	-0.752776	-3.52694	0.00398104	0.11403	-1.77869	PG1_0-PG1_GMTP
ENSMUSG00000083282.3	Ctsf	0.304941	3.96846	3.52486	0.00399657	0.114327	-2.05772	PG1_0-PG1_GMTP
ENSMUSG00000039159.16	Ube2h	0.184484	6.27757	3.52344	0.00400721	0.114485	-2.21726	PG1_0-PG1_GMTP
ENSMUSG00000040310.12	Alx4	2.61221	-4.68497	3.5215	0.00402179	0.114755	-2.76438	PG1_0-PG1_GMTP
ENSMUSG00000090881.3	Phf11	-0.720876	0.744903	-3.51899	0.00404068	0.115085	-1.73931	PG1_0-PG1_GMTP
ENSMUSG00000050174.15	Nudt6	-0.418772	1.05047	-3.5186	0.00404366	0.115085	-1.75153	PG1_0-PG1_GMTP
ENSMUSG00000021133.9	Susd6	-0.183475	7.99498	-3.51773	0.00405027	0.115126	-2.26861	PG1_0-PG1_GMTP
ENSMUSG00000042712.10	Tceal9	0.214521	5.65474	3.51385	0.00407975	0.115663	-2.21011	PG1_0-PG1_GMTP
ENSMUSG00000036278.7	Macrod1	0.336837	3.47677	3.51382	0.00408002	0.115663	-2.01631	PG1_0-PG1_GMTP
ENSMUSG00000029205.12	Chrna9	3.90348	-6.09101	3.51273	0.00408829	0.115663	-3.08077	PG1_0-PG1_GMTP
ENSMUSG00000117886.1	Gm2106	-3.39287	-5.42795	-3.51252	0.00408991	0.115663	-2.94216	PG1_0-PG1_GMTP
ENSMUSG00000031355.16	Arhgap6	0.21549	5.73806	3.50966	0.00411188	0.116137	-2.22166	PG1_0-PG1_GMTP
ENSMUSG00000054364.5	Rhob	0.18348	7.56123	3.50882	0.00411834	0.116173	-2.27776	PG1_0-PG1_GMTP
ENSMUSG00000002699.13	Lcp2	-0.183677	5.90591	-3.50796	0.00412495	0.116212	-2.23201	PG1_0-PG1_GMTP
ENSMUSG00000039206.13	Daglb	0.178149	7.94953	3.50677	0.00413418	0.116325	-2.28827	PG1_0-PG1_GMTP
ENSMUSG00000020564.17	Atxn7l1	-0.264303	5.37884	-3.5045	0.00415176	0.116673	-2.2136	PG1_0-PG1_GMTP
ENSMUSG00000046179.17	E2f8	-0.393612	3.28433	-3.50081	0.00418059	0.117302	-2.01384	PG1_0-PG1_GMTP
ENSMUSG00000020227.10	Irak3	-0.186238	5.05089	-3.50029	0.00418466	0.117302	-2.20168	PG1_0-PG1_GMTP
ENSMUSG00000042306.11	S100a14	-4.01489	-6.05098	-3.49779	0.00420427	0.117704	-3.08188	PG1_0-PG1_GMTP
ENSMUSG00000037860.15	Aim2	-0.194362	5.84869	-3.49414	0.00423311	0.118363	-2.25527	PG1_0-PG1_GMTP
ENSMUSG00000031129.9	Slc9a9	0.270987	5.46898	3.49341	0.00423888	0.118376	-2.23883	PG1_0-PG1_GMTP
ENSMUSG00000040424.15	Hipk4	-3.498	-5.56951	-3.48685	0.00429127	0.119603	-2.98981	PG1_0-PG1_GMTP
ENSMUSG00000018796.13	Acsl1	-0.298741	6.53424	-3.48657	0.00429353	0.119603	-2.29392	PG1_0-PG1_GMTP
ENSMUSG00000030577.14	Cd22	-0.178418	5.54945	-3.484	0.00431429	0.120031	-2.26033	PG1_0-PG1_GMTP
ENSMUSG00000052760.16	A630001G21Rik	-0.252846	4.50202	-3.48042	0.00434325	0.120686	-2.19534	PG1_0-PG1_GMTP
ENSMUSG00000023015.14	Racgap1	-0.255867	4.42787	-3.47779	0.00436471	0.121132	-2.19311	PG1_0-PG1_GMTP
ENSMUSG00000007655.16	Cav1	-0.487094	1.55023	-3.47612	0.00437842	0.121261	-1.85599	PG1_0-PG1_GMTP
ENSMUSG00000026605.14	Cenpf	-0.523074	2.98124	-3.4759	0.00438023	0.121261	-2.01756	PG1_0-PG1_GMTP
ENSMUSG00000024975.13	Pdcd4	0.214444	5.14286	3.46591	0.00446302	0.1234	-2.27115	PG1_0-PG1_GMTP
ENSMUSG00000059447.13	Hadhb	0.224182	6.02409	3.46418	0.00447749	0.123646	-2.31791	PG1_0-PG1_GMTP
ENSMUSG00000000440.12	Pparg	0.158185	6.40273	3.46137	0.00450117	0.124147	-2.33655	PG1_0-PG1_GMTP
ENSMUSG00000006782.16	Cnp	-0.174548	6.14776	-3.4556	0.00455005	0.12534	-2.33844	PG1_0-PG1_GMTP
ENSMUSG00000101939.1	Gm28438	1.82603	-3.22923	3.45201	0.0045808	0.126031	-2.40756	PG1_0-PG1_GMTP
ENSMUSG00000028064.17	Sema4a	-0.203049	5.54859	-3.45018	0.00459654	0.126158	-2.32289	PG1_0-PG1_GMTP
ENSMUSG00000037544.14	Dlgap5	-0.382473	3.04686	-3.45016	0.00459672	0.126158	-2.07294	PG1_0-PG1_GMTP
ENSMUSG00000089651.1	Gm16353	1.55036	-3.2857	3.44788	0.00461637	0.126542	-2.42985	PG1_0-PG1_GMTP
ENSMUSG00000029185.14	Fam114a1	-0.218026	4.41075	-3.44559	0.00463628	0.126808	-2.25073	PG1_0-PG1_GMTP
ENSMUSG00000027843.13	Ptpn22	-0.175237	5.70803	-3.44546	0.00463744	0.126808	-2.33923	PG1_0-PG1_GMTP
ENSMUSG00000026458.13	Ppfia4	-0.225356	5.18211	-3.44449	0.00464582	0.126882	-2.31321	PG1_0-PG1_GMTP
ENSMUSG00000089900.2	Tbc1d22bos	4.21543	-6.58825	3.4385	0.0046983	0.128029	-3.2176	PG1_0-PG1_GMTP
ENSMUSG00000107497.1	Gm44957	3.65834	-4.91398	3.43839	0.00469932	0.128029	-2.88039	PG1_0-PG1_GMTP
ENSMUSG00000031557.16	Plekha2	-0.157674	6.9152	-3.43558	0.00472416	0.128549	-2.39936	PG1_0-PG1_GMTP
ENSMUSG00000007653.12	Gabrb2	3.05476	-7.22639	3.43369	0.00474091	0.128848	-3.3255	PG1_0-PG1_GMTP
ENSMUSG00000066178.4	6030445D17Rik	-2.88827	-4.50501	-3.43035	0.00477068	0.129499	-2.79218	PG1_0-PG1_GMTP
ENSMUSG00000024056.10	Ndc80	-0.371889	3.17958	-3.42921	0.00478088	0.129526	-2.12918	PG1_0-PG1_GMTP
ENSMUSG00000040712.16	Camta2	-0.184376	7.11523	-3.42894	0.0047833	0.129526	-2.41662	PG1_0-PG1_GMTP
ENSMUSG00000113265.1	Gm30198	-3.21469	-5.89895	-3.42553	0.00481405	0.130201	-3.09685	PG1_0-PG1_GMTP
ENSMUSG00000082662.1	Gm15516	2.44371	-5.67265	3.42253	0.00484122	0.130777	-3.05365	PG1_0-PG1_GMTP
ENSMUSG00000042675.15	Ypel3	0.220184	6.28526	3.41679	0.00489365	0.131991	-2.41535	PG1_0-PG1_GMTP
ENSMUSG00000021365.15	Nedd9	0.339529	3.42845	3.41632	0.00489799	0.131991	-2.18719	PG1_0-PG1_GMTP
ENSMUSG00000026819.15	Slc25a25	-0.18718	4.28772	-3.41382	0.00492095	0.13245	-2.29695	PG1_0-PG1_GMTP
ENSMUSG00000035711.5	Dok3	-0.218492	5.80828	-3.41238	0.00493432	0.13265	-2.40505	PG1_0-PG1_GMTP
ENSMUSG00000018927.3	Ccl6	0.19014	8.49202	3.40828	0.00497243	0.133514	-2.47858	PG1_0-PG1_GMTP
ENSMUSG00000020319.9	Wdpcp	0.347642	2.26688	3.4067	0.00498715	0.133744	-2.04897	PG1_0-PG1_GMTP
ENSMUSG00000055184.4	Fam72a	-0.611798	1.48325	-3.40608	0.00499298	0.133744	-1.97128	PG1_0-PG1_GMTP
ENSMUSG00000045328.11	Cenpe	-0.367066	4.09709	-3.40436	0.00500918	0.134016	-2.29362	PG1_0-PG1_GMTP
ENSMUSG00000049580.12	Tsku	-0.332803	3.12523	-3.40168	0.00503442	0.134531	-2.17141	PG1_0-PG1_GMTP
ENSMUSG00000041135.15	Ripk2	-0.198799	3.93715	-3.39876	0.0050621	0.135108	-2.28514	PG1_0-PG1_GMTP
ENSMUSG00000042129.8	Rassf4	-0.220837	9.2989	-3.39301	0.00511702	0.136411	-2.51354	PG1_0-PG1_GMTP
ENSMUSG00000025058.4	5430427O19Rik	-0.222933	4.53434	-3.39185	0.00512817	0.136545	-2.36149	PG1_0-PG1_GMTP
ENSMUSG00000041571.9	Selenow	-0.347786	4.66908	-3.39058	0.00514039	0.136707	-2.37564	PG1_0-PG1_GMTP
ENSMUSG00000027715.9	Ccna2	-0.313354	3.32592	-3.38653	0.00517967	0.137588	-2.22698	PG1_0-PG1_GMTP
ENSMUSG00000028233.6	Tgs1	-0.173973	5.71396	-3.38519	0.00519275	0.137771	-2.45115	PG1_0-PG1_GMTP
ENSMUSG00000049988.5	Lrrc25	-0.194548	7.61152	-3.38273	0.00521674	0.138244	-2.51305	PG1_0-PG1_GMTP
ENSMUSG00000034762.9	Glis1	-3.38348	-6.58584	-3.38167	0.00522713	0.138355	-3.24968	PG1_0-PG1_GMTP
ENSMUSG00000041064.14	Pif1	-0.727935	0.436504	-3.37792	0.00526413	0.139028	-1.96404	PG1_0-PG1_GMTP
ENSMUSG00000026687.14	Aldh9a1	0.17761	6.56576	3.37782	0.00526504	0.139028	-2.4967	PG1_0-PG1_GMTP
ENSMUSG00000086872.1	Gm14225	-2.76013	-6.89	-3.37692	0.00527402	0.139054	-3.30283	PG1_0-PG1_GMTP
ENSMUSG00000016529.5	Il10	-0.660943	1.76707	-3.37647	0.00527848	0.139054	-2.048	PG1_0-PG1_GMTP
ENSMUSG00000040370.13	Etfrf1	0.222676	4.27835	3.37518	0.00529129	0.139227	-2.36702	PG1_0-PG1_GMTP
ENSMUSG00000030499.9	Kctd15	-1.8899	-3.63321	-3.37445	0.00529851	0.139232	-2.61286	PG1_0-PG1_GMTP
ENSMUSG00000025804.5	Ccr1	0.35781	4.68536	3.3739	0.00530394	0.139232	-2.40781	PG1_0-PG1_GMTP
ENSMUSG00000111722.1	Gm47270	1.08944	-2.19199	3.37173	0.00532567	0.139633	-2.22034	PG1_0-PG1_GMTP
ENSMUSG00000029082.17	Bst1	-0.242551	3.02758	-3.37112	0.00533174	0.139633	-2.21302	PG1_0-PG1_GMTP
ENSMUSG00000012443.4	Kif11	-0.376805	4.03989	-3.37027	0.00534025	0.139692	-2.34955	PG1_0-PG1_GMTP
ENSMUSG00000021242.9	Npc2	-0.161959	11.3025	-3.36683	0.00537492	0.140379	-2.56193	PG1_0-PG1_GMTP
ENSMUSG00000033420.12	Antxr1	-0.491226	1.28004	-3.36593	0.00538394	0.140379	-2.0244	PG1_0-PG1_GMTP
ENSMUSG00000099471.1	Gm8451	-1.21788	-2.48207	-3.36579	0.00538542	0.140379	-2.29286	PG1_0-PG1_GMTP
ENSMUSG00000043290.6	Zfp784	3.04287	-5.59176	3.36036	0.00544059	0.141508	-3.07884	PG1_0-PG1_GMTP
ENSMUSG00000097194.2	9330175E14Rik	-0.665688	1.66329	-3.36029	0.00544138	0.141508	-2.06621	PG1_0-PG1_GMTP
ENSMUSG00000110018.2	5430437J10Rik	-0.904962	0.121005	-3.35888	0.0054558	0.141717	-1.99201	PG1_0-PG1_GMTP
ENSMUSG00000093536.7	Smim17	-2.52468	-4.52669	-3.35811	0.00546365	0.141756	-2.85495	PG1_0-PG1_GMTP
ENSMUSG00000109495.1	Gm47692	2.95268	-5.58243	3.35572	0.00548832	0.142231	-3.08013	PG1_0-PG1_GMTP
ENSMUSG00000039238.6	Zfp750	3.48404	-6.43391	3.35451	0.00550074	0.142248	-3.23929	PG1_0-PG1_GMTP
ENSMUSG00000104877.1	Gm42651	-4.32306	-6.47185	-3.35442	0.00550171	0.142248	-3.2459	PG1_0-PG1_GMTP
ENSMUSG00000022504.10	Ciita	-0.205598	7.08642	-3.35287	0.0055177	0.142496	-2.55722	PG1_0-PG1_GMTP
ENSMUSG00000114871.1	Gm21370	-0.687329	-0.382005	-3.34691	0.00557986	0.143935	-2.0222	PG1_0-PG1_GMTP
ENSMUSG00000062312.5	Erbb2	0.680784	-0.480599	3.34363	0.00561439	0.144584	-2.03193	PG1_0-PG1_GMTP
ENSMUSG00000027010.16	Slc25a12	-0.194385	5.57434	-3.34267	0.00562449	0.144584	-2.52323	PG1_0-PG1_GMTP
ENSMUSG00000031584.16	Gsr	0.194817	5.84196	3.3426	0.00562527	0.144584	-2.5358	PG1_0-PG1_GMTP
ENSMUSG00000064363.1	mt-Nd4	0.271335	7.81049	3.34198	0.00563182	0.144584	-2.59235	PG1_0-PG1_GMTP
ENSMUSG00000069114.8	Zbtb10	0.4006	1.76419	3.34145	0.00563742	0.144584	-2.10871	PG1_0-PG1_GMTP
ENSMUSG00000017412.15	Cacnb4	-0.533104	0.659604	-3.34007	0.00565212	0.144738	-2.03284	PG1_0-PG1_GMTP
ENSMUSG00000083557.1	Gm6877	-2.00445	-3.72042	-3.3391	0.00566246	0.144738	-2.67278	PG1_0-PG1_GMTP
ENSMUSG00000086529.1	Acss2os	2.00256	-7.10461	3.33833	0.00567061	0.144738	-3.35724	PG1_0-PG1_GMTP
ENSMUSG00000066026.14	Dhrs3	0.184155	8.55747	3.33793	0.00567489	0.144738	-2.6101	PG1_0-PG1_GMTP
ENSMUSG00000117743.1	Gm50232	2.10697	-3.51085	3.33713	0.00568342	0.144738	-2.61069	PG1_0-PG1_GMTP
ENSMUSG00000022636.13	Alcam	0.158821	8.4365	3.33667	0.00568833	0.144738	-2.61112	PG1_0-PG1_GMTP
ENSMUSG00000105411.1	Gm44488	-2.57663	-6.16288	-3.33662	0.00568886	0.144738	-3.20219	PG1_0-PG1_GMTP
ENSMUSG00000021549.14	Rasa1	0.248809	6.95527	3.33597	0.00569577	0.144749	-2.58532	PG1_0-PG1_GMTP
ENSMUSG00000081475.1	Gm14558	-3.19999	-7.15231	-3.33491	0.00570722	0.144875	-3.36623	PG1_0-PG1_GMTP
ENSMUSG00000074232.3	Gm10647	3.1823	-7.06761	3.33351	0.00572227	0.144884	-3.35426	PG1_0-PG1_GMTP
ENSMUSG00000026430.16	Rassf5	-0.169921	5.793	-3.33327	0.00572476	0.144884	-2.55092	PG1_0-PG1_GMTP
ENSMUSG00000048285.9	Frmd6	0.277305	4.53831	3.33306	0.00572703	0.144884	-2.47015	PG1_0-PG1_GMTP
ENSMUSG00000070501.14	Ifi214	-0.526505	0.75251	-3.32787	0.00578317	0.146133	-2.05702	PG1_0-PG1_GMTP
ENSMUSG00000053646.13	Plxnb1	1.12091	-2.30739	3.32729	0.00578952	0.146133	-2.29963	PG1_0-PG1_GMTP
ENSMUSG00000089476.1	Gm25364	2.69864	-5.23163	3.32651	0.00579807	0.146183	-3.03012	PG1_0-PG1_GMTP
ENSMUSG00000038437.11	Mllt6	-0.149308	6.69513	-3.32536	0.00581053	0.146209	-2.59792	PG1_0-PG1_GMTP
ENSMUSG00000100029.1	D7Ertd128e	-3.59126	-4.50968	-3.32521	0.00581219	0.146209	-2.87761	PG1_0-PG1_GMTP
ENSMUSG00000031617.16	Tmem184c	0.241679	4.83916	3.32177	0.00584999	0.146831	-2.51636	PG1_0-PG1_GMTP
ENSMUSG00000103857.1	Gm37249	-1.22331	-2.54156	-3.32176	0.00585006	0.146831	-2.35885	PG1_0-PG1_GMTP
ENSMUSG00000025795.8	Rassf3	0.150229	7.36028	3.31927	0.0058775	0.147354	-2.62587	PG1_0-PG1_GMTP
ENSMUSG00000020486.19	Septin4	3.83223	-6.14895	3.31801	0.00589149	0.147538	-3.21124	PG1_0-PG1_GMTP
ENSMUSG00000033487.14	Fndc3a	-0.265045	7.38434	-3.31458	0.0059296	0.148179	-2.63509	PG1_0-PG1_GMTP
ENSMUSG00000024044.19	Epb41l3	0.321069	3.43625	3.31451	0.00593033	0.148179	-2.37353	PG1_0-PG1_GMTP
ENSMUSG00000059810.18	Rgs3	-0.369672	3.00345	-3.31361	0.00594036	0.148263	-2.31347	PG1_0-PG1_GMTP
ENSMUSG00000059436.13	Max	-0.175944	7.17785	-3.31263	0.0059513	0.14837	-2.63409	PG1_0-PG1_GMTP
ENSMUSG00000051969.7	Tlr11	-1.15771	-1.37473	-3.31177	0.00596097	0.148446	-2.15956	PG1_0-PG1_GMTP
ENSMUSG00000079224.5	Gm6565	1.70528	-2.58199	3.30912	0.00599074	0.149021	-2.38314	PG1_0-PG1_GMTP
ENSMUSG00000091561.3	Gm6665	-2.70613	-6.1055	-3.30569	0.00602949	0.149817	-3.21116	PG1_0-PG1_GMTP
ENSMUSG00000026012.2	Cd28	0.196172	6.80968	3.30328	0.0060569	0.150331	-2.64209	PG1_0-PG1_GMTP
ENSMUSG00000070369.13	Itgad	0.446812	2.03412	3.30267	0.00606394	0.150339	-2.20546	PG1_0-PG1_GMTP
ENSMUSG00000062480.12	Acat3	-2.8603	-4.28755	-3.30172	0.00607478	0.15044	-2.84716	PG1_0-PG1_GMTP
ENSMUSG00000031880.7	Rrad	-0.42937	2.67733	-3.29751	0.00612298	0.15141	-2.29649	PG1_0-PG1_GMTP
ENSMUSG00000075276.5	Gm13653	3.1568	-5.94739	3.29646	0.00613514	0.15141	-3.18852	PG1_0-PG1_GMTP
ENSMUSG00000021127.7	Zfp36l1	-0.19196	7.16965	-3.29627	0.00613736	0.15141	-2.66428	PG1_0-PG1_GMTP
ENSMUSG00000029545.13	Acads	0.202923	5.18175	3.29595	0.00614108	0.15141	-2.58781	PG1_0-PG1_GMTP
ENSMUSG00000045404.16	Kcnk13	-0.155274	5.93216	-3.29291	0.00617622	0.152108	-2.6316	PG1_0-PG1_GMTP
ENSMUSG00000083688.1	Gm13743	-2.69266	-7.38486	-3.29063	0.00620282	0.152595	-3.42296	PG1_0-PG1_GMTP
ENSMUSG00000029223.12	Uchl1	-0.573308	1.10001	-3.28801	0.00623351	0.153181	-2.14418	PG1_0-PG1_GMTP
ENSMUSG00000081665.2	Gm15922	-0.213641	4.23027	-3.2864	0.00625231	0.15325	-2.52495	PG1_0-PG1_GMTP
ENSMUSG00000064367.1	mt-Nd5	0.227824	9.4055	3.28603	0.00625671	0.15325	-2.713	PG1_0-PG1_GMTP
ENSMUSG00000090216.1	Gm16549	-2.95395	-7.32841	-3.28601	0.00625692	0.15325	-3.41752	PG1_0-PG1_GMTP
ENSMUSG00000032089.16	Il10ra	-0.165761	7.61836	-3.28446	0.00627527	0.153531	-2.69574	PG1_0-PG1_GMTP
ENSMUSG00000101841.1	Gm11993	-1.85252	-3.40759	-3.28371	0.0062841	0.153578	-2.63207	PG1_0-PG1_GMTP
ENSMUSG00000029156.11	Sgcb	-0.211197	5.56265	-3.28166	0.00630838	0.154003	-2.63556	PG1_0-PG1_GMTP
ENSMUSG00000006398.15	Cdc20	-0.366381	3.05857	-3.28084	0.00631814	0.154073	-2.38049	PG1_0-PG1_GMTP
ENSMUSG00000037235.13	Mxd4	0.198912	6.98797	3.27857	0.00634512	0.154562	-2.69267	PG1_0-PG1_GMTP
ENSMUSG00000042246.5	Tmc7	-2.97436	-7.22639	-3.27288	0.00641346	0.156056	-3.41016	PG1_0-PG1_GMTP
ENSMUSG00000018476.7	Kdm6b	0.265798	3.47567	3.27047	0.00644257	0.156395	-2.45917	PG1_0-PG1_GMTP
ENSMUSG00000102235.1	Gm37886	-3.12271	-6.89748	-3.27009	0.0064472	0.156395	-3.36331	PG1_0-PG1_GMTP
ENSMUSG00000089942.9	Pira2	-0.199163	5.93226	-3.26999	0.00644841	0.156395	-2.67405	PG1_0-PG1_GMTP
ENSMUSG00000041343.19	Ankrd42	0.617181	-0.36171	3.26907	0.00645966	0.156498	-2.14134	PG1_0-PG1_GMTP
ENSMUSG00000093772.1	4931403E22Rik	1.62945	-4.00094	3.26603	0.00649666	0.157062	-2.81211	PG1_0-PG1_GMTP
ENSMUSG00000063751.6	Platr8	3.32644	-6.22141	3.266	0.00649704	0.157062	-3.25621	PG1_0-PG1_GMTP
ENSMUSG00000062232.14	Rapgef2	-0.293359	5.5004	-3.26358	0.00652671	0.15736	-2.66577	PG1_0-PG1_GMTP
ENSMUSG00000080465.1	Gm22486	-1.91234	-6.54395	-3.26315	0.00653194	0.15736	-3.31179	PG1_0-PG1_GMTP
ENSMUSG00000021670.14	Hmgcr	-0.192504	5.73667	-3.26296	0.00653431	0.15736	-2.6785	PG1_0-PG1_GMTP
ENSMUSG00000007989.7	Fzd3	4.32252	-4.73644	3.2627	0.00653756	0.15736	-2.97621	PG1_0-PG1_GMTP
ENSMUSG00000056367.14	Actr3b	-0.701936	0.318607	-3.26193	0.00654705	0.157419	-2.1504	PG1_0-PG1_GMTP
ENSMUSG00000002108.10	Nr1h3	-0.201865	6.77841	-3.2581	0.00659435	0.158338	-2.72502	PG1_0-PG1_GMTP
ENSMUSG00000001627.12	Ifrd1	-0.244993	4.73285	-3.25738	0.00660326	0.158338	-2.62668	PG1_0-PG1_GMTP
ENSMUSG00000090125.3	Pou3f1	-0.468045	3.22969	-3.25712	0.00660658	0.158338	-2.44815	PG1_0-PG1_GMTP
ENSMUSG00000034484.8	Snx2	-0.140502	7.96985	-3.25417	0.00664332	0.158833	-2.75804	PG1_0-PG1_GMTP
ENSMUSG00000037251.5	Pomk	-0.170175	4.81886	-3.2536	0.00665041	0.158833	-2.64052	PG1_0-PG1_GMTP
ENSMUSG00000114827.1	Gm46432	1.56942	-2.73451	3.25349	0.0066519	0.158833	-2.48369	PG1_0-PG1_GMTP
ENSMUSG00000042613.9	Pbxip1	-0.169342	6.9518	-3.25318	0.00665573	0.158833	-2.73884	PG1_0-PG1_GMTP
ENSMUSG00000087279.10	4930544D05Rik	3.94988	-6.55077	3.25084	0.00668506	0.159363	-3.32017	PG1_0-PG1_GMTP
ENSMUSG00000107633.1	Gm44078	3.67841	-6.91376	3.25013	0.00669402	0.159406	-3.37697	PG1_0-PG1_GMTP
ENSMUSG00000028773.8	Fabp3	-0.410561	3.17919	-3.24855	0.00671397	0.159569	-2.45632	PG1_0-PG1_GMTP
ENSMUSG00000078963.3	Hsbp1l1	3.40706	-5.59878	3.24846	0.00671514	0.159569	-3.15626	PG1_0-PG1_GMTP
ENSMUSG00000015133.17	Lrrk1	-0.226023	6.1203	-3.24732	0.00672953	0.159707	-2.7235	PG1_0-PG1_GMTP
ENSMUSG00000030275.6	Etnk1	-0.233486	7.22818	-3.24687	0.00673527	0.159707	-2.75727	PG1_0-PG1_GMTP
ENSMUSG00000105443.1	Gm43837	3.5788	-6.8692	3.24394	0.0067725	0.160233	-3.37376	PG1_0-PG1_GMTP
ENSMUSG00000021809.10	Nudt13	-0.192128	4.4667	-3.24368	0.00677577	0.160233	-2.62786	PG1_0-PG1_GMTP
ENSMUSG00000058567.6	Gm2531	-2.95321	-6.9737	-3.24286	0.00678627	0.160233	-3.38996	PG1_0-PG1_GMTP
ENSMUSG00000077148.1	Gm22935	-3.08154	-5.91215	-3.24284	0.00678654	0.160233	-3.21698	PG1_0-PG1_GMTP
ENSMUSG00000103355.1	Gm2147	-2.27448	-5.54686	-3.24231	0.00679339	0.160233	-3.15085	PG1_0-PG1_GMTP
ENSMUSG00000021838.17	Samd4	0.610492	1.36101	3.24108	0.00680911	0.160435	-2.24465	PG1_0-PG1_GMTP
ENSMUSG00000091523.1	AU040972	-3.14381	-7.02878	-3.23929	0.00683206	0.160693	-3.40001	PG1_0-PG1_GMTP
ENSMUSG00000070327.14	Rnf213	-0.682746	9.42326	-3.23893	0.00683667	0.160693	-2.80057	PG1_0-PG1_GMTP
ENSMUSG00000072082.7	Ccnf	-0.33884	3.01279	-3.23854	0.00684167	0.160693	-2.45026	PG1_0-PG1_GMTP
ENSMUSG00000037172.14	Dennd11	0.227268	3.73975	3.23612	0.00687293	0.161257	-2.55784	PG1_0-PG1_GMTP
ENSMUSG00000040701.16	Ap1g2	-0.18265	5.34862	-3.23354	0.0069065	0.161842	-2.71309	PG1_0-PG1_GMTP
ENSMUSG00000027261.2	Hao1	2.5734	-4.40761	3.23308	0.00691237	0.161842	-2.93103	PG1_0-PG1_GMTP
ENSMUSG00000056153.15	Socs6	0.181483	6.51571	3.23114	0.00693774	0.162228	-2.76717	PG1_0-PG1_GMTP
ENSMUSG00000092130.2	D030025P21Rik	3.58817	-5.8176	3.23071	0.00694337	0.162228	-3.20811	PG1_0-PG1_GMTP
ENSMUSG00000049488.14	Tmem67	-0.312488	3.92799	-3.2281	0.00697758	0.162856	-2.5966	PG1_0-PG1_GMTP
ENSMUSG00000030516.14	Tjp1	0.678159	-0.786465	3.22561	0.00701034	0.163299	-2.22722	PG1_0-PG1_GMTP
ENSMUSG00000036992.10	Nxt1	-0.239635	3.4021	-3.22524	0.00701525	0.163299	-2.53093	PG1_0-PG1_GMTP
ENSMUSG00000039057.11	Myo16	-3.72101	-5.00949	-3.22499	0.00701851	0.163299	-3.06048	PG1_0-PG1_GMTP
ENSMUSG00000062582.6	Rpl30-ps8	3.48096	-7.19325	3.22349	0.00703835	0.16359	-3.43206	PG1_0-PG1_GMTP
ENSMUSG00000069996.3	Gm7125	-2.69239	-7.20875	-3.22242	0.00705263	0.163752	-3.43481	PG1_0-PG1_GMTP
ENSMUSG00000032841.15	Prr5l	-0.204442	4.52012	-3.22062	0.00707652	0.164009	-2.67547	PG1_0-PG1_GMTP
ENSMUSG00000099600.1	Gm29126	-3.00854	-6.45543	-3.22048	0.00707844	0.164009	-3.32295	PG1_0-PG1_GMTP
ENSMUSG00000094557.1	Rpl35a-ps7	-2.51381	-7.14701	-3.21969	0.00708891	0.164028	-3.42765	PG1_0-PG1_GMTP
ENSMUSG00000055413.12	H2-Q5	-0.494752	3.32587	-3.21931	0.00709395	0.164028	-2.53058	PG1_0-PG1_GMTP
ENSMUSG00000087477.1	Gm13822	-0.822013	-1.67849	-3.21685	0.00712688	0.164456	-2.33014	PG1_0-PG1_GMTP
ENSMUSG00000046934.5	Csl	-3.1401	-5.43748	-3.21683	0.00712719	0.164456	-3.1483	PG1_0-PG1_GMTP
ENSMUSG00000051435.11	Fhad1	-0.59907	0.119348	-3.21301	0.00717862	0.165472	-2.22564	PG1_0-PG1_GMTP
ENSMUSG00000097694.8	G730013B05Rik	0.894531	-0.724913	3.20995	0.00722022	0.166259	-2.24694	PG1_0-PG1_GMTP
ENSMUSG00000026796.16	Fam129b	0.174739	9.5418	3.20865	0.00723793	0.166495	-2.85731	PG1_0-PG1_GMTP
ENSMUSG00000051177.16	Plcb1	1.09572	-1.24427	3.20774	0.0072503	0.166595	-2.29064	PG1_0-PG1_GMTP
ENSMUSG00000027306.15	Nusap1	-0.302366	3.03791	-3.20538	0.00728263	0.166595	-2.51373	PG1_0-PG1_GMTP
ENSMUSG00000090608.1	Gm17200	-2.52173	-5.81005	-3.20513	0.00728608	0.166595	-3.2238	PG1_0-PG1_GMTP
ENSMUSG00000026395.16	Ptprc	-0.188636	9.87881	-3.2051	0.00728646	0.166595	-2.86487	PG1_0-PG1_GMTP
ENSMUSG00000046997.5	Spsb4	0.315324	3.06657	3.20499	0.00728788	0.166595	-2.51861	PG1_0-PG1_GMTP
ENSMUSG00000036295.5	Lrrn3	3.18333	-5.41092	3.20478	0.00729079	0.166595	-3.15191	PG1_0-PG1_GMTP
ENSMUSG00000033318.7	Gstt2	0.307539	2.53311	3.20451	0.00729453	0.166595	-2.44275	PG1_0-PG1_GMTP
ENSMUSG00000097855.8	A930007I19Rik	-0.432737	1.46647	-3.20388	0.00730313	0.16662	-2.3182	PG1_0-PG1_GMTP
ENSMUSG00000033124.16	Atg9a	-0.191493	4.80993	-3.20013	0.00735499	0.167632	-2.73836	PG1_0-PG1_GMTP
ENSMUSG00000003382.18	Etv3	-0.160461	7.64081	-3.19936	0.0073657	0.167705	-2.85403	PG1_0-PG1_GMTP
ENSMUSG00000036641.9	Ccdc148	0.520775	2.10657	3.19873	0.00737434	0.167731	-2.39706	PG1_0-PG1_GMTP
ENSMUSG00000023206.16	Il15ra	-0.412332	2.409	-3.19742	0.00739255	0.167974	-2.43842	PG1_0-PG1_GMTP
ENSMUSG00000034330.10	Plcg2	-0.165193	7.77686	-3.19616	0.00741011	0.168085	-2.86245	PG1_0-PG1_GMTP
ENSMUSG00000086866.2	4930512H18Rik	-1.18723	-2.20948	-3.19562	0.00741773	0.168085	-2.44285	PG1_0-PG1_GMTP
ENSMUSG00000034768.4	Asb16	-2.70498	-7.33774	-3.19545	0.00742007	0.168085	-3.46676	PG1_0-PG1_GMTP
ENSMUSG00000030109.15	Slc6a12	-0.479568	3.95532	-3.19327	0.00745067	0.168591	-2.66366	PG1_0-PG1_GMTP
ENSMUSG00000057346.12	Apol9a	-0.834663	-1.36956	-3.19247	0.00746186	0.168591	-2.3252	PG1_0-PG1_GMTP
ENSMUSG00000008193.13	Spib	-2.21378	-2.69593	-3.19224	0.00746508	0.168591	-2.54515	PG1_0-PG1_GMTP
ENSMUSG00000052229.5	Gpr17	2.42049	-7.23361	3.18953	0.00750331	0.169131	-3.45601	PG1_0-PG1_GMTP
ENSMUSG00000109314.1	Gm44699	-2.70571	-6.59468	-3.1893	0.00750651	0.169131	-3.36357	PG1_0-PG1_GMTP
ENSMUSG00000037344.14	Slc12a9	-0.234641	5.94125	-3.18893	0.00751172	0.169131	-2.82437	PG1_0-PG1_GMTP
ENSMUSG00000049521.2	Cdc42ep1	2.64733	-3.48765	3.18669	0.00754354	0.169512	-2.75161	PG1_0-PG1_GMTP
ENSMUSG00000095847.1	Gm5451	-1.94187	-2.94217	-3.18606	0.00755257	0.169512	-2.60951	PG1_0-PG1_GMTP
ENSMUSG00000081967.1	Gm14017	2.53373	-4.77737	3.18592	0.00755448	0.169512	-3.04495	PG1_0-PG1_GMTP
ENSMUSG00000117239.1	Gpr31c	-0.460487	2.9283	-3.1856	0.00755904	0.169512	-2.5333	PG1_0-PG1_GMTP
ENSMUSG00000032231.14	Anxa2	0.144889	9.08919	3.1845	0.00757467	0.169586	-2.89968	PG1_0-PG1_GMTP
ENSMUSG00000031639.12	Tlr3	-0.331417	4.54762	-3.18431	0.00757751	0.169586	-2.74476	PG1_0-PG1_GMTP
ENSMUSG00000113587.1	Gm36287	-2.95152	-6.07893	-3.18339	0.00759065	0.169599	-3.28423	PG1_0-PG1_GMTP
ENSMUSG00000064289.15	Tank	-0.233566	5.9697	-3.1832	0.00759332	0.169599	-2.83616	PG1_0-PG1_GMTP
ENSMUSG00000021474.9	Sfxn1	0.217125	4.11693	3.18209	0.00760918	0.169599	-2.70357	PG1_0-PG1_GMTP
ENSMUSG00000002233.13	Rhoc	0.241608	7.09353	3.18186	0.0076125	0.169599	-2.87458	PG1_0-PG1_GMTP
ENSMUSG00000032507.15	Fbxl2	0.334186	2.35127	3.18161	0.00761609	0.169599	-2.45879	PG1_0-PG1_GMTP
ENSMUSG00000078097.3	Gm10913	2.36917	-6.75135	3.18028	0.00763523	0.169855	-3.3926	PG1_0-PG1_GMTP
ENSMUSG00000000194.13	Gpr107	-0.144114	7.15937	-3.17781	0.00767075	0.170309	-2.88366	PG1_0-PG1_GMTP
ENSMUSG00000053797.10	Krt16	4.2781	-4.32565	3.1778	0.0076709	0.170309	-2.9603	PG1_0-PG1_GMTP
ENSMUSG00000063286.7	Gm8995	-0.517475	8.63036	-3.1761	0.00769561	0.170688	-2.91136	PG1_0-PG1_GMTP
ENSMUSG00000019866.15	Crybg1	-0.259536	6.89277	-3.17454	0.0077182	0.171019	-2.88298	PG1_0-PG1_GMTP
ENSMUSG00000002055.9	Spag5	-0.379328	2.53364	-3.17393	0.0077271	0.171026	-2.49735	PG1_0-PG1_GMTP
ENSMUSG00000105851.1	9130604C24Rik	-1.07765	-1.53254	-3.17347	0.00773384	0.171026	-2.37014	PG1_0-PG1_GMTP
ENSMUSG00000024235.11	Map3k8	-0.167231	5.18191	-3.17263	0.00774605	0.171126	-2.81544	PG1_0-PG1_GMTP
ENSMUSG00000069289.2	Vmn1r203	2.36906	-7.43197	3.17142	0.00776364	0.171205	-3.49186	PG1_0-PG1_GMTP
ENSMUSG00000021707.5	Dhfr	-0.295134	2.29063	-3.17133	0.00776497	0.171205	-2.46895	PG1_0-PG1_GMTP
ENSMUSG00000048621.3	Gm6377	-0.287153	3.51826	-3.17053	0.00777674	0.171296	-2.647	PG1_0-PG1_GMTP
ENSMUSG00000113196.1	D230049E03Rik	3.48093	-6.75915	3.16894	0.00780012	0.171546	-3.40036	PG1_0-PG1_GMTP
ENSMUSG00000041598.7	Cdc42ep4	-0.186974	5.10595	-3.16871	0.00780347	0.171546	-2.81768	PG1_0-PG1_GMTP
ENSMUSG00000066621.12	Tecpr1	0.187358	8.20068	3.16658	0.00783476	0.172064	-2.92387	PG1_0-PG1_GMTP
ENSMUSG00000070604.5	Vsig10l	0.340754	2.06062	3.16598	0.00784372	0.172091	-2.44906	PG1_0-PG1_GMTP
ENSMUSG00000029179.14	Zcchc4	-0.242299	3.49586	-3.16277	0.00789124	0.172964	-2.65793	PG1_0-PG1_GMTP
ENSMUSG00000079593.9	Gm14597	0.983457	-1.65748	3.16098	0.00791788	0.173377	-2.40264	PG1_0-PG1_GMTP
ENSMUSG00000030327.8	Necap1	-0.154128	6.02713	-3.16014	0.00793051	0.173484	-2.88114	PG1_0-PG1_GMTP
ENSMUSG00000103613.1	Gm34882	2.16506	-5.71284	3.15748	0.00797027	0.174183	-3.239	PG1_0-PG1_GMTP
ENSMUSG00000108976.1	Gm29797	-2.70503	-7.2968	-3.15629	0.00798825	0.174377	-3.48239	PG1_0-PG1_GMTP
ENSMUSG00000004609.11	Cd33	0.37344	3.3702	3.15585	0.00799478	0.174377	-2.6522	PG1_0-PG1_GMTP
ENSMUSG00000031570.17	Plpp5	0.309109	3.22976	3.15427	0.0080186	0.174726	-2.63437	PG1_0-PG1_GMTP
ENSMUSG00000031667.16	Aktip	0.161328	4.82987	3.15264	0.00804329	0.175093	-2.82731	PG1_0-PG1_GMTP
ENSMUSG00000063021.3	H2ac15	3.72915	-6.59182	3.15176	0.00805671	0.17511	-3.3855	PG1_0-PG1_GMTP
ENSMUSG00000112288.1	Gm47879	2.79061	-5.75388	3.15063	0.00807392	0.17511	-3.25075	PG1_0-PG1_GMTP
ENSMUSG00000078817.4	Nlrp12	-3.05551	-7.12213	-3.15055	0.00807513	0.17511	-3.46222	PG1_0-PG1_GMTP
ENSMUSG00000115210.1	Gm49308	-2.97418	-7.30827	-3.15052	0.0080755	0.17511	-3.487	PG1_0-PG1_GMTP
ENSMUSG00000114165.1	Gm47513	-3.01495	-5.09794	-3.15001	0.00808337	0.175111	-3.13395	PG1_0-PG1_GMTP
ENSMUSG00000097709.8	2810429I04Rik	3.48093	-6.3944	3.14805	0.00811324	0.175432	-3.35746	PG1_0-PG1_GMTP
ENSMUSG00000078485.3	Plekhn1	-0.220314	5.48661	-3.148	0.00811392	0.175432	-2.87849	PG1_0-PG1_GMTP
ENSMUSG00000015112.15	Slc25a13	0.157373	5.14057	3.14666	0.0081345	0.175707	-2.8606	PG1_0-PG1_GMTP
ENSMUSG00000100367.1	Gm29336	-0.719378	-1.36995	-3.143	0.00819082	0.17654	-2.39447	PG1_0-PG1_GMTP
ENSMUSG00000064120.14	Mocs1	-0.17603	5.89189	-3.14289	0.00819245	0.17654	-2.90735	PG1_0-PG1_GMTP
ENSMUSG00000052763.7	Zfp212	-0.191269	3.9092	-3.14261	0.00819679	0.17654	-2.75051	PG1_0-PG1_GMTP
ENSMUSG00000089883.1	Gm3355	-2.2747	-6.86887	-3.14202	0.00820596	0.176567	-3.43182	PG1_0-PG1_GMTP
ENSMUSG00000106208.1	Gm4734	-3.26987	-6.27053	-3.14032	0.00823229	0.176962	-3.34279	PG1_0-PG1_GMTP
ENSMUSG00000081418.1	Gm14830	2.31448	-5.26326	3.13936	0.00824719	0.177112	-3.17218	PG1_0-PG1_GMTP
ENSMUSG00000024521.8	Pmaip1	-0.230194	4.42552	-3.13775	0.00827228	0.17748	-2.8183	PG1_0-PG1_GMTP
ENSMUSG00000090222.2	Ifi203-ps	-0.641445	2.11125	-3.13488	0.00831711	0.17827	-2.51011	PG1_0-PG1_GMTP
ENSMUSG00000038065.13	Mturn	0.347615	2.78655	3.13375	0.00833475	0.178477	-2.60567	PG1_0-PG1_GMTP
ENSMUSG00000018819.10	Lsp1	0.200679	5.27041	3.13095	0.00837888	0.178621	-2.89766	PG1_0-PG1_GMTP
ENSMUSG00000000732.9	Icosl	-0.403027	2.7776	-3.13079	0.00838142	0.178621	-2.60966	PG1_0-PG1_GMTP
ENSMUSG00000041957.15	Pkp2	0.456054	1.87966	3.13058	0.00838469	0.178621	-2.48939	PG1_0-PG1_GMTP
ENSMUSG00000035004.3	Igsf6	-0.139908	8.47056	-3.13027	0.00838963	0.178621	-2.99451	PG1_0-PG1_GMTP
ENSMUSG00000003779.16	Kif20a	-0.366852	3.1707	-3.13008	0.0083926	0.178621	-2.66929	PG1_0-PG1_GMTP
ENSMUSG00000113966.1	Gm47980	-3.61496	-5.82199	-3.12995	0.00839469	0.178621	-3.27629	PG1_0-PG1_GMTP
ENSMUSG00000006218.4	Fam131c	-2.69252	-7.2968	-3.12978	0.00839748	0.178621	-3.49674	PG1_0-PG1_GMTP
ENSMUSG00000062510.12	Nsl1	-0.262791	2.63833	-3.12852	0.0084173	0.178872	-2.5933	PG1_0-PG1_GMTP
ENSMUSG00000027522.15	Stx16	-0.176098	6.37374	-3.12779	0.00842903	0.178951	-2.95366	PG1_0-PG1_GMTP
ENSMUSG00000016528.10	Mapkapk2	-0.202793	8.18594	-3.12583	0.00846016	0.179432	-2.99913	PG1_0-PG1_GMTP
ENSMUSG00000015759.11	Cnih1	0.198155	5.26768	3.12535	0.00846781	0.179432	-2.90781	PG1_0-PG1_GMTP
ENSMUSG00000042851.17	Zc3h6	0.339357	2.09957	3.12457	0.00848031	0.179527	-2.52678	PG1_0-PG1_GMTP
ENSMUSG00000038418.7	Egr1	0.430448	1.61908	3.12347	0.00849791	0.179729	-2.47251	PG1_0-PG1_GMTP
ENSMUSG00000002204.9	Napsa	-0.256869	6.32286	-3.12216	0.00851892	0.179998	-2.96232	PG1_0-PG1_GMTP
ENSMUSG00000035045.17	Zc3h12b	0.882495	-2.07749	3.12167	0.00852677	0.179998	-2.51416	PG1_0-PG1_GMTP
ENSMUSG00000070323.11	Mmp27	0.178265	4.31455	3.11995	0.00855436	0.180289	-2.83954	PG1_0-PG1_GMTP
ENSMUSG00000104641.1	Gm43290	3.60278	-4.3933	3.11934	0.00856427	0.180289	-3.02363	PG1_0-PG1_GMTP
ENSMUSG00000050747.14	Trim15	-2.03381	-3.32746	-3.11899	0.00856988	0.180289	-2.77739	PG1_0-PG1_GMTP
ENSMUSG00000022321.15	Cdh10	-2.95235	-6.5396	-3.11854	0.00857722	0.180289	-3.39764	PG1_0-PG1_GMTP
ENSMUSG00000030342.8	Cd9	0.208824	8.26797	3.11831	0.00858095	0.180289	-3.01415	PG1_0-PG1_GMTP
ENSMUSG00000041143.16	Tmco4	-0.20305	4.89175	-3.11697	0.0086026	0.18054	-2.89776	PG1_0-PG1_GMTP
ENSMUSG00000037946.11	Fgd3	-0.149042	7.72543	-3.11657	0.00860909	0.18054	-3.00889	PG1_0-PG1_GMTP
ENSMUSG00000032091.15	Tmprss4	-0.752226	-1.87187	-3.11483	0.00863739	0.180963	-2.4928	PG1_0-PG1_GMTP
ENSMUSG00000040478.14	Prdm13	-2.33478	-4.3873	-3.11075	0.00870399	0.182188	-3.02973	PG1_0-PG1_GMTP
ENSMUSG00000041420.18	Meis3	0.307053	3.24352	3.1095	0.00872458	0.182448	-2.71736	PG1_0-PG1_GMTP
ENSMUSG00000059776.7	Rpl13-ps6	-2.54117	-4.28039	-3.10809	0.00874786	0.182637	-3.01081	PG1_0-PG1_GMTP
ENSMUSG00000026509.15	Capn2	0.144854	7.02912	3.10725	0.00876167	0.182637	-3.01095	PG1_0-PG1_GMTP
ENSMUSG00000021451.16	Sema4d	-0.145313	9.63993	-3.10704	0.00876512	0.182637	-3.04596	PG1_0-PG1_GMTP
ENSMUSG00000023104.9	Rfc2	-0.209969	5.78913	-3.10696	0.00876636	0.182637	-2.96909	PG1_0-PG1_GMTP
ENSMUSG00000027555.8	Car13	-0.188209	5.32033	-3.10645	0.00877489	0.182644	-2.94578	PG1_0-PG1_GMTP
ENSMUSG00000038936.13	Sccpdh	0.424341	2.40905	3.10583	0.00878508	0.182685	-2.6011	PG1_0-PG1_GMTP
ENSMUSG00000039115.13	Itga9	-0.273836	3.85406	-3.10427	0.00881096	0.182762	-2.81345	PG1_0-PG1_GMTP
ENSMUSG00000030051.10	Aplf	0.269337	2.68974	3.10422	0.00881183	0.182762	-2.64421	PG1_0-PG1_GMTP
ENSMUSG00000021477.9	Ctsl	0.158209	10.9175	3.10413	0.00881335	0.182762	-3.05114	PG1_0-PG1_GMTP
ENSMUSG00000039741.15	Bahcc1	-0.367422	3.44516	-3.10251	0.00884031	0.183151	-2.75998	PG1_0-PG1_GMTP
ENSMUSG00000082419.3	Gm11425	-0.317496	2.51931	-3.10133	0.00885993	0.183387	-2.62462	PG1_0-PG1_GMTP
ENSMUSG00000038235.4	F11r	-0.370369	1.25708	-3.09996	0.00888279	0.18369	-2.47693	PG1_0-PG1_GMTP
ENSMUSG00000025165.12	Sectm1a	-0.986286	-2.0209	-3.09583	0.00895235	0.184813	-2.53879	PG1_0-PG1_GMTP
ENSMUSG00000023800.15	Tiam2	-0.447348	0.0747492	-3.09575	0.00895366	0.184813	-2.41271	PG1_0-PG1_GMTP
ENSMUSG00000093026.1	Gm25301	-2.28352	-6.49624	-3.09356	0.00899059	0.185259	-3.40638	PG1_0-PG1_GMTP
ENSMUSG00000019055.15	Plod1	-0.186516	7.7352	-3.09349	0.00899187	0.185259	-3.05174	PG1_0-PG1_GMTP
ENSMUSG00000028859.14	Csf3r	-0.177391	6.93765	-3.09232	0.00901177	0.185498	-3.03618	PG1_0-PG1_GMTP
ENSMUSG00000066378.3	Gm10160	-2.93308	-6.87136	-3.0917	0.00902226	0.185543	-3.46121	PG1_0-PG1_GMTP
ENSMUSG00000070806.5	Zmynd12	-3.39261	-5.98361	-3.08871	0.00907319	0.186418	-3.33034	PG1_0-PG1_GMTP
ENSMUSG00000016763.15	Scube1	-2.69103	-6.12494	-3.08728	0.00909778	0.186751	-3.3537	PG1_0-PG1_GMTP
ENSMUSG00000006930.15	Hap1	-0.782699	0.079395	-3.08059	0.00921308	0.188819	-2.43709	PG1_0-PG1_GMTP
ENSMUSG00000064065.15	Ipcef1	-0.438426	1.98703	-3.08046	0.00921543	0.188819	-2.59008	PG1_0-PG1_GMTP
ENSMUSG00000031958.16	Ldhd	0.523619	-0.570979	3.07967	0.00922912	0.188926	-2.43754	PG1_0-PG1_GMTP
ENSMUSG00000026096.14	Osgepl1	0.451986	1.17812	3.07797	0.00925873	0.189196	-2.50722	PG1_0-PG1_GMTP
ENSMUSG00000051212.8	Gpr183	-0.305466	3.15989	-3.07794	0.00925929	0.189196	-2.76176	PG1_0-PG1_GMTP
ENSMUSG00000056758.14	Hmga2	0.212444	4.07198	3.07708	0.00927429	0.18933	-2.89032	PG1_0-PG1_GMTP
ENSMUSG00000035547.14	Capn5	-0.146726	5.59008	-3.07564	0.00929958	0.189625	-3.01723	PG1_0-PG1_GMTP
ENSMUSG00000027074.14	Slc43a3	-0.325602	2.39846	-3.07528	0.00930574	0.189625	-2.6538	PG1_0-PG1_GMTP
ENSMUSG00000102207.1	Gm10344	-3.14368	-6.94689	-3.0735	0.00933704	0.190089	-3.48202	PG1_0-PG1_GMTP
ENSMUSG00000094018.2	S100a2	2.3691	-7.19942	3.07054	0.00938937	0.19098	-3.51678	PG1_0-PG1_GMTP
ENSMUSG00000023349.14	Clec4n	-0.219075	3.66151	-3.07003	0.00939829	0.190987	-2.84997	PG1_0-PG1_GMTP
ENSMUSG00000023150.14	Ivns1abp	0.160685	6.36928	3.06925	0.00941212	0.191068	-3.0615	PG1_0-PG1_GMTP
ENSMUSG00000014907.10	Naf1	0.209155	3.67995	3.06874	0.00942116	0.191068	-2.85481	PG1_0-PG1_GMTP
ENSMUSG00000080364.1	Gm25777	1.34526	-3.02081	3.06836	0.00942794	0.191068	-2.75778	PG1_0-PG1_GMTP
ENSMUSG00000057093.14	Zfp607b	0.501939	0.327604	3.06738	0.0094455	0.19125	-2.46713	PG1_0-PG1_GMTP
ENSMUSG00000027984.8	Hadh	0.154474	5.50269	3.06619	0.00946658	0.191424	-3.03002	PG1_0-PG1_GMTP
ENSMUSG00000038518.15	Jarid2	-0.17854	5.43701	-3.06591	0.00947157	0.191424	-3.02703	PG1_0-PG1_GMTP
ENSMUSG00000070960.4	Gm19680	-0.756832	-1.94849	-3.06545	0.00947985	0.191424	-2.56805	PG1_0-PG1_GMTP
ENSMUSG00000025402.12	Nab2	0.186024	5.01401	3.06377	0.00950998	0.191828	-3.00446	PG1_0-PG1_GMTP
ENSMUSG00000112693.1	Gm5512	-1.00632	-2.41339	-3.06329	0.00951846	0.191828	-2.64257	PG1_0-PG1_GMTP
ENSMUSG00000093390.1	Gm20652	-1.34331	-2.88742	-3.06289	0.00952563	0.191828	-2.73472	PG1_0-PG1_GMTP
ENSMUSG00000022972.10	Cfap298	0.419758	1.07937	3.06175	0.00954613	0.192068	-2.5261	PG1_0-PG1_GMTP
ENSMUSG00000024425.4	Ndfip1	0.179068	7.1976	3.05933	0.00958982	0.192773	-3.10355	PG1_0-PG1_GMTP
ENSMUSG00000099746.1	Ppnr	-2.97438	-7.19942	-3.05827	0.00960892	0.192857	-3.52359	PG1_0-PG1_GMTP
ENSMUSG00000108358.1	Gm44509	0.733453	-0.019169	3.05783	0.00961698	0.192857	-2.47109	PG1_0-PG1_GMTP
ENSMUSG00000018381.15	Abi3	-0.229291	3.99512	-3.05767	0.00961996	0.192857	-2.91621	PG1_0-PG1_GMTP
ENSMUSG00000079053.3	Gm14010	-3.12257	-6.071	-3.05689	0.00963395	0.192964	-3.36506	PG1_0-PG1_GMTP
ENSMUSG00000117111.1	Tpt1-ps7	3.58776	-6.63949	3.05531	0.00966277	0.193368	-3.45032	PG1_0-PG1_GMTP
ENSMUSG00000046157.13	Tmem229b	-0.148186	6.70415	-3.05482	0.00967169	0.193373	-3.0988	PG1_0-PG1_GMTP
ENSMUSG00000026807.8	Ak8	0.282768	3.33769	3.04983	0.00976303	0.195025	-2.83925	PG1_0-PG1_GMTP
ENSMUSG00000064558.1	Gm24620	-2.70506	-7.26983	-3.0456	0.00984127	0.196344	-3.53941	PG1_0-PG1_GMTP
ENSMUSG00000018554.13	Ybx2	-2.69168	-6.64565	-3.04531	0.00984666	0.196344	-3.45721	PG1_0-PG1_GMTP
ENSMUSG00000067219.9	Nipal1	-2.97577	-6.34799	-3.04369	0.00987677	0.196607	-3.41544	PG1_0-PG1_GMTP
ENSMUSG00000059108.4	Ifitm6	-0.39873	2.82373	-3.04365	0.00987747	0.196607	-2.77252	PG1_0-PG1_GMTP
ENSMUSG00000088984.1	Gm25604	-2.01943	-4.04741	-3.04254	0.00989806	0.19667	-3.02253	PG1_0-PG1_GMTP
ENSMUSG00000110058.1	Gm5907	-3.21357	-7.06425	-3.04253	0.00989829	0.19667	-3.51517	PG1_0-PG1_GMTP
ENSMUSG00000040774.15	Cept1	-0.159363	6.94601	-3.03963	0.00995253	0.19734	-3.13357	PG1_0-PG1_GMTP
ENSMUSG00000020023.18	Tmcc3	-0.240193	6.59732	-3.03883	0.00996768	0.19734	-3.125	PG1_0-PG1_GMTP
ENSMUSG00000041774.16	Ydjc	0.497232	1.39479	3.03851	0.00997352	0.19734	-2.59542	PG1_0-PG1_GMTP
ENSMUSG00000107462.1	Gm7384	-2.97475	-6.96223	-3.03806	0.00998203	0.19734	-3.50446	PG1_0-PG1_GMTP
ENSMUSG00000034255.17	Arhgap27	-0.191463	5.19049	-3.03736	0.00999528	0.19734	-3.06482	PG1_0-PG1_GMTP
ENSMUSG00000090061.9	Nwd2	-3.08062	-6.18208	-3.03664	0.0100088	0.19734	-3.39521	PG1_0-PG1_GMTP
ENSMUSG00000000791.9	Il12rb1	-0.720192	0.513799	-3.03591	0.0100227	0.19734	-2.52816	PG1_0-PG1_GMTP
ENSMUSG00000074178.3	Gm10638	1.22153	-3.0046	3.03574	0.0100259	0.19734	-2.79024	PG1_0-PG1_GMTP
ENSMUSG00000104068.1	Gm37199	0.529121	0.181343	3.0356	0.0100284	0.19734	-2.51262	PG1_0-PG1_GMTP
ENSMUSG00000034457.10	Eda2r	-1.24139	-2.14882	-3.03558	0.0100288	0.19734	-2.63485	PG1_0-PG1_GMTP
ENSMUSG00000065715.1	Snord7	-2.4829	-5.42632	-3.03556	0.0100293	0.19734	-3.27622	PG1_0-PG1_GMTP
ENSMUSG00000002058.13	Unc119	0.182696	4.66336	3.03052	0.010125	0.198937	-3.0374	PG1_0-PG1_GMTP
ENSMUSG00000020978.10	Klhdc2	0.154537	4.67783	3.03035	0.0101283	0.198937	-3.03904	PG1_0-PG1_GMTP
ENSMUSG00000018362.14	Kpna2	-0.19248	5.27158	-3.02922	0.0101497	0.199182	-3.08477	PG1_0-PG1_GMTP
ENSMUSG00000053208.10	Kat2b-ps	-3.72171	-5.38179	-3.0286	0.0101617	0.199242	-3.27389	PG1_0-PG1_GMTP
ENSMUSG00000006386.15	Tek	-2.70611	-6.14027	-3.02678	0.0101965	0.199749	-3.39533	PG1_0-PG1_GMTP
ENSMUSG00000087047.8	1700110K17Rik	-2.85274	-6.67051	-3.02276	0.0102742	0.20089	-3.47425	PG1_0-PG1_GMTP
ENSMUSG00000030055.16	Rab43	-0.269362	3.70518	-3.02242	0.0102808	0.20089	-2.94238	PG1_0-PG1_GMTP
ENSMUSG00000079227.10	Ccr5	-0.159991	8.00707	-3.02237	0.0102817	0.20089	-3.1876	PG1_0-PG1_GMTP
ENSMUSG00000023947.8	Nfkbie	-0.253275	4.27645	-3.02119	0.0103045	0.201158	-3.01593	PG1_0-PG1_GMTP
ENSMUSG00000035354.9	Uvrag	-0.153778	6.36143	-3.0201	0.0103258	0.20139	-3.15174	PG1_0-PG1_GMTP
ENSMUSG00000027244.14	Atg13	-0.145092	6.55511	-3.01941	0.0103391	0.20139	-3.15942	PG1_0-PG1_GMTP
ENSMUSG00000049598.9	Vsig8	0.321439	2.43599	3.01919	0.0103435	0.20139	-2.75852	PG1_0-PG1_GMTP
ENSMUSG00000029661.16	Col1a2	-0.228749	4.26614	-3.01692	0.0103878	0.202077	-3.02257	PG1_0-PG1_GMTP
ENSMUSG00000050106.17	Tmc8	0.385852	1.72952	3.01615	0.0104028	0.202194	-2.67098	PG1_0-PG1_GMTP
ENSMUSG00000071042.12	Rasgrp3	0.215632	4.94685	3.01549	0.0104158	0.20227	-3.08822	PG1_0-PG1_GMTP
ENSMUSG00000042351.9	Grap2	-0.452238	2.24641	-3.014	0.0104451	0.202662	-2.74097	PG1_0-PG1_GMTP
ENSMUSG00000112614.1	Gm9030	2.79611	-5.70929	3.01261	0.0104725	0.202939	-3.33836	PG1_0-PG1_GMTP
ENSMUSG00000079889.4	Gm11951	-2.9755	-6.48718	-3.01201	0.0104843	0.202939	-3.45528	PG1_0-PG1_GMTP
ENSMUSG00000024805.16	Pcgf5	-0.236194	4.60618	-3.01189	0.0104866	0.202939	-3.06626	PG1_0-PG1_GMTP
ENSMUSG00000038774.9	Ascc3	-0.348072	6.198	-3.00912	0.0105416	0.203825	-3.16606	PG1_0-PG1_GMTP
ENSMUSG00000022742.6	Cpox	0.157107	5.01587	3.00804	0.010563	0.203922	-3.10678	PG1_0-PG1_GMTP
ENSMUSG00000048371.8	Pdp2	-0.198263	4.53794	-3.00795	0.0105649	0.203922	-3.06713	PG1_0-PG1_GMTP
ENSMUSG00000020589.17	Fam49a	-0.195248	7.41462	-3.00691	0.0105855	0.204078	-3.20505	PG1_0-PG1_GMTP
ENSMUSG00000030867.7	Plk1	-0.406238	2.65014	-3.00663	0.0105913	0.204078	-2.81239	PG1_0-PG1_GMTP
ENSMUSG00000052609.9	Plekhg3	-0.18458	5.61727	-3.00496	0.0106245	0.204543	-3.1485	PG1_0-PG1_GMTP
ENSMUSG00000030761.16	Myo7a	0.258314	5.1942	3.00349	0.010654	0.2048	-3.12716	PG1_0-PG1_GMTP
ENSMUSG00000072949.6	Acot1	0.337974	1.67685	3.00338	0.0106562	0.2048	-2.68693	PG1_0-PG1_GMTP
ENSMUSG00000032013.6	Trim29	-0.430838	2.15489	-3.00265	0.010671	0.204907	-2.74845	PG1_0-PG1_GMTP
ENSMUSG00000032691.14	Nlrp3	-0.210422	4.49198	-3.00056	0.010713	0.205196	-3.07614	PG1_0-PG1_GMTP
ENSMUSG00000027401.9	Tgm3	2.79093	-7.33774	2.99984	0.0107277	0.205196	-3.57283	PG1_0-PG1_GMTP
ENSMUSG00000023908.8	Pkmyt1	-0.38666	2.10778	-2.99982	0.010728	0.205196	-2.74708	PG1_0-PG1_GMTP
ENSMUSG00000004044.9	Cavin1	0.43932	1.21041	2.99969	0.0107305	0.205196	-2.64335	PG1_0-PG1_GMTP
ENSMUSG00000020895.14	Tmem107	-0.422989	1.85925	-2.99962	0.010732	0.205196	-2.71542	PG1_0-PG1_GMTP
ENSMUSG00000001089.14	Luzp1	-0.27001	5.56818	-2.99885	0.0107476	0.205317	-3.15718	PG1_0-PG1_GMTP
ENSMUSG00000042742.7	Bmt2	-0.228008	7.57563	-2.99832	0.0107584	0.205348	-3.22423	PG1_0-PG1_GMTP
ENSMUSG00000078606.8	Gm4070	-0.568523	4.87413	-2.99712	0.0107827	0.20562	-3.11619	PG1_0-PG1_GMTP
ENSMUSG00000035161.7	Ints6	0.218051	5.0556	2.99671	0.0107911	0.20562	-3.13027	PG1_0-PG1_GMTP
ENSMUSG00000030122.12	Ptms	-0.236325	9.51534	-2.99616	0.0108022	0.205656	-3.25023	PG1_0-PG1_GMTP
ENSMUSG00000028245.15	Nsmaf	-0.169121	5.14088	-2.99463	0.0108335	0.206061	-3.13991	PG1_0-PG1_GMTP
ENSMUSG00000073007.10	Tent5d	3.82471	-6.15038	2.99367	0.010853	0.206061	-3.41842	PG1_0-PG1_GMTP
ENSMUSG00000038453.17	Srcin1	-2.14648	-3.33508	-2.99349	0.0108567	0.206061	-2.90946	PG1_0-PG1_GMTP
ENSMUSG00000072769.6	Gm10419	0.19734	3.03319	2.99331	0.0108604	0.206061	-2.89464	PG1_0-PG1_GMTP
ENSMUSG00000084744.1	Gm25291	-2.85248	-6.87148	-2.99261	0.0108747	0.206158	-3.51905	PG1_0-PG1_GMTP
ENSMUSG00000079037.9	Prnp	0.152499	5.50021	2.99086	0.0109107	0.206664	-3.16823	PG1_0-PG1_GMTP
ENSMUSG00000031862.11	Atp13a1	-0.16504	6.3997	-2.99023	0.0109237	0.206705	-3.20797	PG1_0-PG1_GMTP
ENSMUSG00000028076.12	Cd1d1	-0.251166	3.14698	-2.98985	0.0109314	0.206705	-2.91834	PG1_0-PG1_GMTP
ENSMUSG00000048334.8	Gm8258	3.67311	-5.61524	2.98835	0.0109623	0.207092	-3.34058	PG1_0-PG1_GMTP
ENSMUSG00000106648.1	Gm43176	-3.38362	-6.70954	-2.98796	0.0109704	0.207092	-3.50049	PG1_0-PG1_GMTP
ENSMUSG00000100865.2	Gm9320	0.721098	-0.366371	2.98533	0.0110249	0.207921	-2.58043	PG1_0-PG1_GMTP
ENSMUSG00000029650.10	Slc46a3	0.170026	6.61228	2.98494	0.0110329	0.207921	-3.22457	PG1_0-PG1_GMTP
ENSMUSG00000068463.4	B630019A10Rik	3.29666	-4.90581	2.98374	0.011058	0.208184	-3.22831	PG1_0-PG1_GMTP
ENSMUSG00000037254.18	Itih2	2.36906	-7.43197	2.98332	0.0110668	0.208184	-3.5929	PG1_0-PG1_GMTP
ENSMUSG00000034317.14	Trim59	-0.305117	3.178	-2.98293	0.0110749	0.208184	-2.93557	PG1_0-PG1_GMTP
ENSMUSG00000032526.11	Ss18l2	0.305556	2.86061	2.98107	0.0111138	0.208568	-2.88999	PG1_0-PG1_GMTP
ENSMUSG00000013622.15	Atraid	0.183225	5.03719	2.98074	0.0111206	0.208568	-3.15823	PG1_0-PG1_GMTP
ENSMUSG00000055795.6	Gm5160	-3.589	-6.63101	-2.98061	0.0111234	0.208568	-3.49442	PG1_0-PG1_GMTP
ENSMUSG00000020707.6	Rnf135	-0.173949	4.46626	-2.97871	0.0111633	0.20914	-3.11342	PG1_0-PG1_GMTP
ENSMUSG00000001138.13	Cnnm3	0.178832	4.82073	2.9776	0.0111866	0.209289	-3.14762	PG1_0-PG1_GMTP
ENSMUSG00000030849.18	Fgfr2	-3.0785	-3.50981	-2.97707	0.0111979	0.209289	-2.96693	PG1_0-PG1_GMTP
ENSMUSG00000037106.8	Fer1l6	1.97613	-3.13196	2.97672	0.0112052	0.209289	-2.88225	PG1_0-PG1_GMTP
ENSMUSG00000029016.13	Clcn6	-0.207305	4.30032	-2.97655	0.0112087	0.209289	-3.10001	PG1_0-PG1_GMTP
ENSMUSG00000114004.1	Gm48552	2.87472	-5.73597	2.9757	0.0112267	0.20945	-3.36823	PG1_0-PG1_GMTP
ENSMUSG00000087480.1	Gm15910	0.57939	-0.413081	2.97511	0.0112392	0.209507	-2.59607	PG1_0-PG1_GMTP
ENSMUSG00000030865.4	Chp2	0.680447	-0.0412629	2.97399	0.011263	0.209775	-2.60372	PG1_0-PG1_GMTP
ENSMUSG00000091742.2	Gm5093	3.2471	-6.86414	2.97327	0.0112784	0.209887	-3.5295	PG1_0-PG1_GMTP
ENSMUSG00000046753.10	Ccdc66	0.288375	2.66537	2.97216	0.011302	0.210151	-2.876	PG1_0-PG1_GMTP
ENSMUSG00000045326.13	Fndc7	-0.685894	-0.479208	-2.97129	0.0113204	0.21018	-2.60197	PG1_0-PG1_GMTP
ENSMUSG00000005107.13	Slc2a9	-0.196512	4.29008	-2.9712	0.0113224	0.21018	-3.1086	PG1_0-PG1_GMTP
ENSMUSG00000041645.14	Ddx24	-0.161341	6.88461	-2.97	0.0113481	0.210482	-3.26001	PG1_0-PG1_GMTP
ENSMUSG00000102863.1	Gm37639	-2.5837	-4.38593	-2.9688	0.0113736	0.210781	-3.15085	PG1_0-PG1_GMTP
ENSMUSG00000029371.7	Cxcl5	3.06934	-4.29988	2.96712	0.0114096	0.211273	-3.13697	PG1_0-PG1_GMTP
ENSMUSG00000039156.19	Stim2	-0.141177	5.21402	-2.96592	0.0114355	0.21128	-3.1972	PG1_0-PG1_GMTP
ENSMUSG00000092373.1	Gm20535	1.52751	-3.34958	2.96551	0.0114443	0.21128	-2.94189	PG1_0-PG1_GMTP
ENSMUSG00000068220.6	Lgals1	0.186335	8.51816	2.96499	0.0114556	0.21128	-3.30004	PG1_0-PG1_GMTP
ENSMUSG00000110910.1	4921534A09Rik	-3.1988	-6.2608	-2.96486	0.0114583	0.21128	-3.45305	PG1_0-PG1_GMTP
ENSMUSG00000021536.7	Adcy2	-0.436267	0.920865	-2.96402	0.0114765	0.21128	-2.67715	PG1_0-PG1_GMTP
ENSMUSG00000024644.17	Cndp2	-0.139912	9.40945	-2.96383	0.0114808	0.21128	-3.30925	PG1_0-PG1_GMTP
ENSMUSG00000064925.1	Snora62	-2.32558	-6.58234	-2.96363	0.0114849	0.21128	-3.49827	PG1_0-PG1_GMTP
ENSMUSG00000087175.7	Gm15133	-0.607366	-0.0542453	-2.96328	0.0114925	0.21128	-2.62032	PG1_0-PG1_GMTP
ENSMUSG00000037580.10	Gch1	-0.283732	5.04695	-2.96293	0.0115001	0.21128	-3.19147	PG1_0-PG1_GMTP
ENSMUSG00000013846.10	St3gal1	-0.1928	7.29061	-2.96175	0.0115257	0.21128	-3.28532	PG1_0-PG1_GMTP
ENSMUSG00000020838.12	Slc6a4	0.747357	-0.639496	2.96158	0.0115294	0.21128	-2.61807	PG1_0-PG1_GMTP
ENSMUSG00000025496.5	Drd4	-2.70513	-7.20875	-2.96143	0.0115327	0.21128	-3.57894	PG1_0-PG1_GMTP
ENSMUSG00000033105.12	Lss	-0.188216	4.59025	-2.96098	0.0115425	0.21128	-3.15778	PG1_0-PG1_GMTP
ENSMUSG00000084883.2	Ccdc85c	0.859247	-1.11934	2.96052	0.0115525	0.21128	-2.63531	PG1_0-PG1_GMTP
ENSMUSG00000025656.17	Arhgef9	1.17487	-2.13688	2.96021	0.0115593	0.21128	-2.72933	PG1_0-PG1_GMTP
ENSMUSG00000014599.10	Csf1	-0.275894	3.35191	-2.9601	0.0115615	0.21128	-3.00327	PG1_0-PG1_GMTP
ENSMUSG00000062345.10	Serpinb2	1.83348	-0.984434	2.95898	0.011586	0.211553	-2.6313	PG1_0-PG1_GMTP
ENSMUSG00000065130.1	Gm24457	2.70135	-6.75029	2.9584	0.0115988	0.211614	-3.52365	PG1_0-PG1_GMTP
ENSMUSG00000105748.1	Gm43088	0.797178	-1.08086	2.95672	0.0116354	0.212109	-2.63889	PG1_0-PG1_GMTP
ENSMUSG00000027959.14	Sass6	-0.419619	3.09278	-2.95609	0.0116492	0.212186	-2.97053	PG1_0-PG1_GMTP
ENSMUSG00000030220.13	Arhgdib	-0.159319	8.02744	-2.95551	0.0116621	0.212248	-3.31093	PG1_0-PG1_GMTP
ENSMUSG00000017314.12	Mpp2	2.99074	-3.83003	2.95397	0.0116959	0.21269	-3.06111	PG1_0-PG1_GMTP
ENSMUSG00000040987.15	Mill2	-0.327372	3.24808	-2.95274	0.011723	0.212738	-3.00062	PG1_0-PG1_GMTP
ENSMUSG00000023345.17	Poc1a	-0.312518	2.55259	-2.9526	0.0117261	0.212738	-2.89367	PG1_0-PG1_GMTP
ENSMUSG00000046768.13	Rhoj	0.287293	3.6236	2.95225	0.0117338	0.212738	-3.058	PG1_0-PG1_GMTP
ENSMUSG00000097890.2	4930547M16Rik	-2.8366	-4.76699	-2.95174	0.0117451	0.212738	-3.23063	PG1_0-PG1_GMTP
ENSMUSG00000038811.13	Gngt2	-0.15882	7.06646	-2.95131	0.0117547	0.212738	-3.2991	PG1_0-PG1_GMTP
ENSMUSG00000073494.5	Sh2d1b2	2.08687	-4.42899	2.95126	0.0117557	0.212738	-3.17344	PG1_0-PG1_GMTP
ENSMUSG00000035626.4	Olfr1509	-3.12264	-6.55263	-2.9489	0.0118081	0.213453	-3.50337	PG1_0-PG1_GMTP
ENSMUSG00000036139.6	Hoxc9	-2.69109	-6.17256	-2.94822	0.0118232	0.213453	-3.45134	PG1_0-PG1_GMTP
ENSMUSG00000042817.15	Flt3	3.03098	-4.87775	2.94813	0.0118252	0.213453	-3.25195	PG1_0-PG1_GMTP
ENSMUSG00000000275.16	Trim25	-0.147339	8.53996	-2.94758	0.0118374	0.213453	-3.33227	PG1_0-PG1_GMTP
ENSMUSG00000040997.14	Abhd4	0.145109	6.36213	2.94733	0.0118431	0.213453	-3.28538	PG1_0-PG1_GMTP
ENSMUSG00000035095.11	Fam167a	-1.72507	-3.00246	-2.94674	0.0118562	0.213507	-2.8886	PG1_0-PG1_GMTP
ENSMUSG00000042249.11	Grk3	-0.219431	4.19662	-2.94634	0.0118652	0.213507	-3.14309	PG1_0-PG1_GMTP
ENSMUSG00000040204.6	Pclaf	-0.297661	3.44921	-2.9459	0.0118751	0.213512	-3.04372	PG1_0-PG1_GMTP
ENSMUSG00000004105.8	Angptl2	0.190489	5.92625	2.9451	0.011893	0.213663	-3.27259	PG1_0-PG1_GMTP
ENSMUSG00000040467.1	4921522P10Rik	-2.70594	-6.3183	-2.9434	0.0119312	0.214176	-3.47492	PG1_0-PG1_GMTP
ENSMUSG00000027359.16	Slc27a2	-2.9539	-7.30827	-2.94285	0.0119435	0.214224	-3.60095	PG1_0-PG1_GMTP
ENSMUSG00000070544.6	Top1	0.153258	6.21154	2.94154	0.0119729	0.214579	-3.29057	PG1_0-PG1_GMTP
ENSMUSG00000079580.9	Tmem217	0.984467	-2.24939	2.9393	0.0120234	0.215312	-2.77099	PG1_0-PG1_GMTP
ENSMUSG00000087268.1	Gm14486	3.24724	-7.1068	2.93829	0.0120464	0.21555	-3.57991	PG1_0-PG1_GMTP
ENSMUSG00000046826.7	Fam187b	-0.559569	-0.187482	-2.93103	0.0122124	0.218345	-2.66763	PG1_0-PG1_GMTP
ENSMUSG00000000982.5	Ccl3	-0.210272	5.67832	-2.92932	0.0122517	0.218874	-3.29007	PG1_0-PG1_GMTP
ENSMUSG00000031932.14	Gpr83	-2.75019	-4.1795	-2.92859	0.0122684	0.218997	-3.14972	PG1_0-PG1_GMTP
ENSMUSG00000114545.1	Gm32184	1.47061	-3.1849	2.92748	0.0122941	0.21928	-2.94664	PG1_0-PG1_GMTP
ENSMUSG00000037437.18	Adam32	-1.82288	-2.70678	-2.92643	0.0123186	0.219411	-2.85717	PG1_0-PG1_GMTP
ENSMUSG00000035382.9	Pcsk7	-0.199903	5.27217	-2.92632	0.0123211	0.219411	-3.2732	PG1_0-PG1_GMTP
ENSMUSG00000053964.17	Lgals4	1.26395	-2.90069	2.92527	0.0123454	0.219668	-2.89318	PG1_0-PG1_GMTP
ENSMUSG00000087259.7	2610035D17Rik	0.305511	2.41359	2.92469	0.0123589	0.219732	-2.92231	PG1_0-PG1_GMTP
ENSMUSG00000026688.5	Mgst3	0.20408	4.28876	2.92418	0.0123708	0.219769	-3.19396	PG1_0-PG1_GMTP
ENSMUSG00000102856.1	Gm37084	2.98254	-4.15962	2.92334	0.0123904	0.219942	-3.15091	PG1_0-PG1_GMTP
ENSMUSG00000024529.14	Lox	-0.3033	4.30228	-2.92146	0.0124344	0.220372	-3.20044	PG1_0-PG1_GMTP
ENSMUSG00000001415.10	Smg5	-0.163451	5.49761	-2.92146	0.0124344	0.220372	-3.2951	PG1_0-PG1_GMTP
ENSMUSG00000106553.1	6720482G16Rik	2.36916	-6.8627	2.92086	0.0124484	0.220445	-3.56034	PG1_0-PG1_GMTP
ENSMUSG00000025151.16	Maged1	0.16205	5.89976	2.92043	0.0124585	0.220449	-3.31659	PG1_0-PG1_GMTP
ENSMUSG00000110206.1	Flt3l	-0.387686	1.01503	-2.91927	0.0124857	0.220497	-2.76079	PG1_0-PG1_GMTP
ENSMUSG00000040405.13	Havcr1	3.21716	-6.82706	2.91907	0.0124904	0.220497	-3.55699	PG1_0-PG1_GMTP
ENSMUSG00000032420.8	Nt5e	-3.7859	-5.31709	-2.91905	0.0124909	0.220497	-3.34459	PG1_0-PG1_GMTP
ENSMUSG00000108353.1	Gm45205	-2.17988	-4.87606	-2.91736	0.0125307	0.220963	-3.27628	PG1_0-PG1_GMTP
ENSMUSG00000042671.12	Rgs8	2.42046	-7.15547	2.91709	0.012537	0.220963	-3.5978	PG1_0-PG1_GMTP
ENSMUSG00000052911.9	Lamb2	0.481312	0.684916	2.91647	0.0125516	0.221045	-2.73701	PG1_0-PG1_GMTP
ENSMUSG00000073980.5	Gm9574	-0.601038	0.232761	-2.91542	0.0125767	0.221236	-2.70883	PG1_0-PG1_GMTP
ENSMUSG00000086417.1	Gm12996	-3.14223	-6.38293	-2.91518	0.0125823	0.221236	-3.50178	PG1_0-PG1_GMTP
ENSMUSG00000046959.16	Slc26a1	0.943397	-1.50651	2.91365	0.0126184	0.221697	-2.72621	PG1_0-PG1_GMTP
ENSMUSG00000040842.17	Szrd1	-0.129588	7.18606	-2.91006	0.0127042	0.222861	-3.37767	PG1_0-PG1_GMTP
ENSMUSG00000032946.16	Rasgrp2	0.520069	1.00284	2.91004	0.0127047	0.222861	-2.77517	PG1_0-PG1_GMTP
ENSMUSG00000088188.1	Gm22214	2.56445	-7.15172	2.90944	0.0127189	0.222935	-3.60173	PG1_0-PG1_GMTP
ENSMUSG00000096981.2	Gm16845	0.482671	0.757405	2.9081	0.0127511	0.223155	-2.75672	PG1_0-PG1_GMTP
ENSMUSG00000031604.10	Msmo1	-0.180582	5.96556	-2.90809	0.0127514	0.223155	-3.34198	PG1_0-PG1_GMTP
ENSMUSG00000024245.4	Tmem178	-0.323525	4.32633	-2.90765	0.0127618	0.223161	-3.22808	PG1_0-PG1_GMTP
ENSMUSG00000055159.7	4930583K01Rik	-2.6142	-6.108	-2.90597	0.0128022	0.223693	-3.47013	PG1_0-PG1_GMTP
ENSMUSG00000009863.14	Sdhb	-0.146826	7.2128	-2.90359	0.0128597	0.224423	-3.39013	PG1_0-PG1_GMTP
ENSMUSG00000115522.1	Gm49173	1.62236	-4.23451	2.90341	0.0128641	0.224423	-3.18166	PG1_0-PG1_GMTP
ENSMUSG00000115793.1	Gm48961	-2.86375	-3.70914	-2.90298	0.0128745	0.224429	-3.085	PG1_0-PG1_GMTP
ENSMUSG00000031549.16	Ido2	-1.7056	-1.4947	-2.90143	0.0129122	0.224911	-2.7423	PG1_0-PG1_GMTP
ENSMUSG00000064360.1	mt-Nd3	0.539754	-0.287332	2.90082	0.012927	0.224992	-2.71263	PG1_0-PG1_GMTP
ENSMUSG00000093816.1	Gm26445	2.36909	-7.22889	2.90033	0.0129389	0.224995	-3.6158	PG1_0-PG1_GMTP
ENSMUSG00000032594.11	Ip6k1	0.151089	6.78018	2.89966	0.0129553	0.224995	-3.38596	PG1_0-PG1_GMTP
ENSMUSG00000002985.16	Apoe	0.240775	11.8431	2.89957	0.0129574	0.224995	-3.42302	PG1_0-PG1_GMTP
ENSMUSG00000090843.2	Heatr4	-1.28827	-2.51438	-2.89776	0.0130018	0.22559	-2.8604	PG1_0-PG1_GMTP
ENSMUSG00000084558.1	Gm24836	2.79542	-7.01184	2.89731	0.0130127	0.225605	-3.59233	PG1_0-PG1_GMTP
ENSMUSG00000092526.1	Gm17907	1.22079	-2.62755	2.89505	0.0130682	0.22623	-2.88114	PG1_0-PG1_GMTP
ENSMUSG00000048142.9	Nat8l	0.422258	2.7201	2.89501	0.0130691	0.22623	-3.02147	PG1_0-PG1_GMTP
ENSMUSG00000105936.1	Gm43544	-3.39274	-5.72186	-2.89403	0.0130932	0.226269	-3.42338	PG1_0-PG1_GMTP
ENSMUSG00000024851.14	Pitpnm1	-0.164538	7.01156	-2.89402	0.0130935	0.226269	-3.40263	PG1_0-PG1_GMTP
ENSMUSG00000104030.1	5330406M23Rik	1.979	-4.92064	2.89369	0.0131018	0.226269	-3.30229	PG1_0-PG1_GMTP
ENSMUSG00000061852.9	Gm7582	1.99841	-5.292	2.89091	0.0131704	0.227279	-3.36187	PG1_0-PG1_GMTP
ENSMUSG00000101595.1	Gm29395	1.59196	-4.14128	2.88928	0.0132109	0.22743	-3.17836	PG1_0-PG1_GMTP
ENSMUSG00000057135.12	Scimp	-0.536362	1.47437	-2.88913	0.0132146	0.22743	-2.86005	PG1_0-PG1_GMTP
ENSMUSG00000041025.15	Iffo2	-0.159394	5.11046	-2.88883	0.0132221	0.22743	-3.33107	PG1_0-PG1_GMTP
ENSMUSG00000028362.2	Tnfsf8	-0.466514	-0.134399	-2.88864	0.0132269	0.22743	-2.73573	PG1_0-PG1_GMTP
ENSMUSG00000091639.2	Gm3756	1.08355	-2.58123	2.88831	0.013235	0.22743	-2.88195	PG1_0-PG1_GMTP
ENSMUSG00000027744.4	Stoml3	2.79083	-6.9285	2.8881	0.0132403	0.22743	-3.58779	PG1_0-PG1_GMTP
ENSMUSG00000032492.14	Pth1r	-1.13798	-2.46315	-2.88747	0.013256	0.227448	-2.86534	PG1_0-PG1_GMTP
ENSMUSG00000057914.15	Cacnb2	3.21732	-5.87475	2.88609	0.0132903	0.227448	-3.45082	PG1_0-PG1_GMTP
ENSMUSG00000047067.7	Dusp28	-0.382654	3.03319	-2.88601	0.0132923	0.227448	-3.08658	PG1_0-PG1_GMTP
ENSMUSG00000028626.5	Col9a2	-2.97533	-6.61762	-2.88573	0.0132995	0.227448	-3.5509	PG1_0-PG1_GMTP
ENSMUSG00000027409.5	1700020A23Rik	-2.27472	-6.98237	-2.88541	0.0133074	0.227448	-3.5958	PG1_0-PG1_GMTP
ENSMUSG00000046334.4	Gm6195	2.79521	-7.32166	2.8853	0.0133102	0.227448	-3.63462	PG1_0-PG1_GMTP
ENSMUSG00000112105.1	Rps7-ps2	-3.38286	-5.79578	-2.8852	0.0133127	0.227448	-3.4402	PG1_0-PG1_GMTP
ENSMUSG00000089155.1	Gm23582	-2.2748	-7.43197	-2.88412	0.0133398	0.227709	-3.64732	PG1_0-PG1_GMTP
ENSMUSG00000024232.2	Bambi	0.341052	2.09559	2.88377	0.0133484	0.227709	-2.94849	PG1_0-PG1_GMTP
ENSMUSG00000103285.1	Gm37274	2.12283	-3.72367	2.88289	0.0133707	0.22789	-3.10764	PG1_0-PG1_GMTP
ENSMUSG00000031451.6	Gas6	0.160881	7.92232	2.88224	0.0133871	0.22789	-3.44354	PG1_0-PG1_GMTP
ENSMUSG00000053647.4	Gper1	-4.09808	-6.29464	-2.88214	0.0133897	0.22789	-3.51118	PG1_0-PG1_GMTP
ENSMUSG00000085255.1	Taco1os	-1.33676	-3.47623	-2.88129	0.0134111	0.228081	-3.05648	PG1_0-PG1_GMTP
ENSMUSG00000100347.1	Gm7895	-1.55769	-2.25515	-2.87997	0.0134443	0.228353	-2.84647	PG1_0-PG1_GMTP
ENSMUSG00000034855.13	Cxcl10	-0.467582	4.23506	-2.87984	0.0134476	0.228353	-3.26822	PG1_0-PG1_GMTP
ENSMUSG00000034708.12	Grn	-0.161492	11.6816	-2.87927	0.013462	0.228425	-3.46129	PG1_0-PG1_GMTP
ENSMUSG00000025920.19	Stau2	0.2156	3.90994	2.87781	0.0134991	0.228879	-3.23175	PG1_0-PG1_GMTP
ENSMUSG00000093722.1	Gm20612	-1.22599	-3.19913	-2.8774	0.0135095	0.228881	-3.00346	PG1_0-PG1_GMTP
ENSMUSG00000035392.17	Dennd1a	-0.167518	6.69719	-2.87684	0.0135237	0.228948	-3.42522	PG1_0-PG1_GMTP
ENSMUSG00000034248.7	Slc25a37	-0.213213	4.6903	-2.87446	0.0135845	0.229803	-3.32443	PG1_0-PG1_GMTP
ENSMUSG00000039798.2	2600006K01Rik	2.3475	-4.21688	2.87053	0.0136852	0.231332	-3.20795	PG1_0-PG1_GMTP
ENSMUSG00000022474.15	Pmm1	0.214101	3.78673	2.86935	0.0137156	0.23167	-3.23039	PG1_0-PG1_GMTP
ENSMUSG00000044313.13	Mab21l3	-1.5855	-3.26789	-2.86795	0.0137518	0.232	-3.02722	PG1_0-PG1_GMTP
ENSMUSG00000102715.1	Gm6209	0.489718	1.72814	2.86779	0.0137559	0.232	-2.92746	PG1_0-PG1_GMTP
ENSMUSG00000021094.10	Dhrs7	0.183018	5.88017	2.86603	0.0138017	0.232559	-3.41504	PG1_0-PG1_GMTP
ENSMUSG00000002688.8	Prkd1	-2.69126	-4.87344	-2.86571	0.0138099	0.232559	-3.31735	PG1_0-PG1_GMTP
ENSMUSG00000111852.1	Gm33180	2.36927	-6.17997	2.86403	0.0138536	0.233119	-3.50773	PG1_0-PG1_GMTP
ENSMUSG00000042812.5	Foxf1	-2.8329	-5.9267	-2.86361	0.0138645	0.233126	-3.47356	PG1_0-PG1_GMTP
ENSMUSG00000036902.11	Neto2	-0.54391	-0.26267	-2.86146	0.0139209	0.233846	-2.77451	PG1_0-PG1_GMTP
ENSMUSG00000056091.12	St3gal5	-0.176717	6.17469	-2.86118	0.0139282	0.233846	-3.43601	PG1_0-PG1_GMTP
ENSMUSG00000017146.12	Brca1	-0.244952	3.2022	-2.85973	0.0139663	0.234118	-3.16017	PG1_0-PG1_GMTP
ENSMUSG00000055546.6	Timd4	0.5045	0.669354	2.85898	0.0139859	0.234118	-2.83081	PG1_0-PG1_GMTP
ENSMUSG00000070923.4	Klhl9	0.150421	6.50577	2.85882	0.0139901	0.234118	-3.45208	PG1_0-PG1_GMTP
ENSMUSG00000002803.14	Btbd6	0.284777	3.20726	2.85865	0.0139946	0.234118	-3.1629	PG1_0-PG1_GMTP
ENSMUSG00000066258.13	Trim12a	-0.215469	5.24693	-2.85856	0.0139969	0.234118	-3.39511	PG1_0-PG1_GMTP
ENSMUSG00000097415.2	AU020206	-0.148725	6.4678	-2.85799	0.0140119	0.234192	-3.45234	PG1_0-PG1_GMTP
ENSMUSG00000044229.9	Nxpe4	-0.298558	2.39098	-2.85708	0.0140359	0.234418	-3.03795	PG1_0-PG1_GMTP
ENSMUSG00000101628.1	Gm28177	-2.16765	-4.4501	-2.85471	0.0140988	0.235292	-3.25989	PG1_0-PG1_GMTP
ENSMUSG00000107283.3	Mpv17	0.172964	4.56233	2.85362	0.0141276	0.235448	-3.35032	PG1_0-PG1_GMTP
ENSMUSG00000097530.1	Kansl2-ps	-0.776483	-1.41275	-2.85356	0.0141292	0.235448	-2.80372	PG1_0-PG1_GMTP
ENSMUSG00000002325.15	Irf9	-0.122294	6.67566	-2.85033	0.0142152	0.236705	-3.47293	PG1_0-PG1_GMTP
ENSMUSG00000033965.10	Slc16a2	-3.12238	-4.96632	-2.84909	0.0142485	0.237082	-3.34486	PG1_0-PG1_GMTP
ENSMUSG00000102425.1	Gm26616	-0.874943	-1.40706	-2.84803	0.014277	0.237379	-2.81115	PG1_0-PG1_GMTP
ENSMUSG00000040724.5	Kcna2	0.504587	1.40093	2.84615	0.0143274	0.23804	-2.92492	PG1_0-PG1_GMTP
ENSMUSG00000117964.1	Gm36043	-0.535315	1.72446	-2.84561	0.0143419	0.238104	-2.96522	PG1_0-PG1_GMTP
ENSMUSG00000009108.15	Gnat2	3.58816	-5.83914	2.84398	0.014386	0.238657	-3.47502	PG1_0-PG1_GMTP
ENSMUSG00000107505.1	Stambp-ps1	1.54766	-4.10297	2.8428	0.0144181	0.238926	-3.21403	PG1_0-PG1_GMTP
ENSMUSG00000031996.17	Aplp2	0.140104	9.78446	2.8426	0.0144236	0.238926	-3.5328	PG1_0-PG1_GMTP
ENSMUSG00000028420.13	Tmem38b	-0.186513	6.54613	-2.84069	0.0144753	0.239561	-3.48642	PG1_0-PG1_GMTP
ENSMUSG00000047220.5	Ccdc36	-3.45729	-5.70773	-2.84039	0.0144834	0.239561	-3.45934	PG1_0-PG1_GMTP
ENSMUSG00000036450.4	Hif1an	0.150427	5.69621	2.83923	0.0145152	0.239909	-3.45521	PG1_0-PG1_GMTP
ENSMUSG00000106262.1	Gm43375	-1.88303	-3.85994	-2.83563	0.0146136	0.241358	-3.17903	PG1_0-PG1_GMTP
ENSMUSG00000081404.1	Gm15694	1.78694	-4.48234	2.83517	0.0146263	0.241388	-3.28177	PG1_0-PG1_GMTP
ENSMUSG00000024778.13	Fas	-0.411373	2.61232	-2.83453	0.0146439	0.241406	-3.11157	PG1_0-PG1_GMTP
ENSMUSG00000044715.7	Gskip	0.148333	5.10145	2.83435	0.014649	0.241406	-3.42947	PG1_0-PG1_GMTP
ENSMUSG00000021047.7	Nova1	3.05462	-6.82706	2.83251	0.0146997	0.241887	-3.60896	PG1_0-PG1_GMTP
ENSMUSG00000038598.9	Shoc1	3.29863	-6.68257	2.8325	0.0146999	0.241887	-3.59175	PG1_0-PG1_GMTP
ENSMUSG00000020802.8	Ube2o	0.230312	4.06428	2.82969	0.0147779	0.242992	-3.33841	PG1_0-PG1_GMTP
ENSMUSG00000033781.7	Asb13	-0.191088	4.58483	-2.82768	0.0148338	0.243731	-3.39944	PG1_0-PG1_GMTP
ENSMUSG00000038886.10	Man2a2	0.213208	7.2045	2.82721	0.0148469	0.243766	-3.52941	PG1_0-PG1_GMTP
ENSMUSG00000033717.6	Adra2a	2.68437	-3.13165	2.82442	0.014925	0.244869	-3.04813	PG1_0-PG1_GMTP
ENSMUSG00000034906.15	Ncaph	-0.274909	3.18377	-2.82176	0.0149996	0.245819	-3.22496	PG1_0-PG1_GMTP
ENSMUSG00000113268.1	4930477G07Rik	1.16451	-3.34803	2.82143	0.0150089	0.245819	-3.09219	PG1_0-PG1_GMTP
ENSMUSG00000031389.17	Arhgap4	-0.153662	6.51361	-2.82118	0.015016	0.245819	-3.52088	PG1_0-PG1_GMTP
ENSMUSG00000058624.13	Gda	-0.263424	4.4507	-2.81755	0.0151188	0.247321	-3.40439	PG1_0-PG1_GMTP
ENSMUSG00000086564.9	Cd101	-0.231963	2.32264	-2.81712	0.015131	0.247339	-3.09779	PG1_0-PG1_GMTP
ENSMUSG00000066442.17	Mthfs	0.372876	2.46393	2.81668	0.0151437	0.247366	-3.11994	PG1_0-PG1_GMTP
ENSMUSG00000029309.7	Sparcl1	3.06216	-6.89181	2.81574	0.0151703	0.247574	-3.62654	PG1_0-PG1_GMTP
ENSMUSG00000106596.1	Gm42822	3.05432	-6.16658	2.81545	0.0151786	0.247574	-3.53816	PG1_0-PG1_GMTP
ENSMUSG00000112332.1	4930466K18Rik	-3.20964	-4.07931	-2.81499	0.0151918	0.247607	-3.23551	PG1_0-PG1_GMTP
ENSMUSG00000028042.15	Zbtb7b	-0.146692	7.24352	-2.81209	0.0152749	0.248779	-3.55785	PG1_0-PG1_GMTP
ENSMUSG00000085054.2	Gm15834	-1.38349	-2.83457	-2.81152	0.0152912	0.248865	-3.01193	PG1_0-PG1_GMTP
ENSMUSG00000091370.1	5730435O14Rik	-3.52356	-7.12894	-2.81102	0.0153055	0.248916	-3.65584	PG1_0-PG1_GMTP
ENSMUSG00000097842.2	9330104G04Rik	0.679436	-0.530271	2.80805	0.0153911	0.250015	-2.85133	PG1_0-PG1_GMTP
ENSMUSG00000031565.18	Fgfr1	0.333272	3.01393	2.80761	0.0154039	0.250015	-3.22307	PG1_0-PG1_GMTP
ENSMUSG00000027637.3	Rab5if	-0.17791	5.79154	-2.80701	0.0154214	0.250015	-3.51834	PG1_0-PG1_GMTP
ENSMUSG00000021482.10	Prxl2c	0.155528	5.09653	2.80681	0.0154269	0.250015	-3.47903	PG1_0-PG1_GMTP
ENSMUSG00000019970.15	Sgk1	-0.183135	7.42626	-2.80674	0.0154292	0.250015	-3.57175	PG1_0-PG1_GMTP
ENSMUSG00000026003.5	Acadl	0.150235	6.47781	2.80436	0.0154982	0.250952	-3.55029	PG1_0-PG1_GMTP
ENSMUSG00000038648.5	Creb3l2	0.247695	4.10544	2.80382	0.015514	0.250955	-3.3901	PG1_0-PG1_GMTP
ENSMUSG00000025537.12	Phkg1	0.963789	-2.79878	2.80358	0.0155209	0.250955	-3.01551	PG1_0-PG1_GMTP
ENSMUSG00000085196.1	Gm14963	2.61327	-6.67766	2.8031	0.0155351	0.251003	-3.60931	PG1_0-PG1_GMTP
ENSMUSG00000066009.8	Zfp987	-1.9008	-7.25586	-2.80234	0.0155571	0.251177	-3.67446	PG1_0-PG1_GMTP
ENSMUSG00000025745.12	Hadha	0.118291	7.44691	2.80127	0.0155885	0.251385	-3.58214	PG1_0-PG1_GMTP
ENSMUSG00000023883.13	Phf10	0.167851	4.38155	2.80113	0.0155925	0.251385	-3.42674	PG1_0-PG1_GMTP
ENSMUSG00000111792.1	Gm33858	2.60373	-5.48176	2.80043	0.015613	0.251532	-3.45684	PG1_0-PG1_GMTP
ENSMUSG00000086743.2	Hnrnpa1l2-ps	1.71938	-5.4982	2.7973	0.0157051	0.252738	-3.46142	PG1_0-PG1_GMTP
ENSMUSG00000047090.13	Tmem198b	0.252724	2.84587	2.79712	0.0157105	0.252738	-3.21472	PG1_0-PG1_GMTP
ENSMUSG00000035713.15	Usp35	-0.299541	3.98762	-2.79641	0.0157314	0.252833	-3.38844	PG1_0-PG1_GMTP
ENSMUSG00000115384.1	Gm49205	3.49109	-6.80962	2.79615	0.015739	0.252833	-3.62895	PG1_0-PG1_GMTP
ENSMUSG00000020521.7	Rnft1	0.172954	5.90168	2.79568	0.015753	0.252875	-3.54387	PG1_0-PG1_GMTP
ENSMUSG00000109176.1	Zfp264	1.26549	-7.2968	2.79414	0.0157988	0.253428	-3.68341	PG1_0-PG1_GMTP
ENSMUSG00000030605.15	Mfge8	0.170099	10.5705	2.79316	0.0158277	0.253692	-3.62313	PG1_0-PG1_GMTP
ENSMUSG00000022146.12	Osmr	1.44925	-2.38295	2.79282	0.015838	0.253692	-2.97115	PG1_0-PG1_GMTP
ENSMUSG00000049231.6	Gm12497	2.79544	-6.95076	2.79138	0.0158808	0.254195	-3.64777	PG1_0-PG1_GMTP
ENSMUSG00000028487.18	Bnc2	1.50225	-4.65943	2.79009	0.0159193	0.254628	-3.34701	PG1_0-PG1_GMTP
ENSMUSG00000083101.1	Gm13430	-1.71552	-6.0426	-2.78834	0.0159718	0.255207	-3.54038	PG1_0-PG1_GMTP
ENSMUSG00000025092.7	Hspa12a	1.87806	-3.18304	2.78789	0.0159851	0.255207	-3.09719	PG1_0-PG1_GMTP
ENSMUSG00000025647.16	Shisa5	-0.140082	9.04828	-2.78772	0.0159904	0.255207	-3.62919	PG1_0-PG1_GMTP
ENSMUSG00000028443.6	Nudt2	0.246156	3.01955	2.78736	0.0160012	0.255207	-3.25988	PG1_0-PG1_GMTP
ENSMUSG00000108063.1	Gm3279	1.51998	-5.15276	2.78689	0.0160154	0.255251	-3.42101	PG1_0-PG1_GMTP
ENSMUSG00000110993.1	Gm47963	3.49255	-4.52274	2.78384	0.0161072	0.256476	-3.33194	PG1_0-PG1_GMTP
ENSMUSG00000085563.2	2210411M09Rik	-2.71833	-6.44258	-2.78358	0.0161152	0.256476	-3.59349	PG1_0-PG1_GMTP
ENSMUSG00000050350.8	Gpr18	-0.393334	0.686656	-2.78316	0.016128	0.256496	-2.9573	PG1_0-PG1_GMTP
ENSMUSG00000028517.8	Plpp3	0.263065	3.86163	2.78158	0.0161756	0.25707	-3.39852	PG1_0-PG1_GMTP
ENSMUSG00000029826.14	Zc3hav1	-0.194787	8.00977	-2.78049	0.0162089	0.257307	-3.63046	PG1_0-PG1_GMTP
ENSMUSG00000074281.3	Gm12522	-0.890778	-3.36659	-2.78033	0.0162136	0.257307	-3.13884	PG1_0-PG1_GMTP
ENSMUSG00000033530.8	Ttc7b	0.156072	5.22409	2.77878	0.0162609	0.257875	-3.53831	PG1_0-PG1_GMTP
ENSMUSG00000047798.15	Cd300lf	-0.210366	3.51393	-2.77791	0.0162875	0.258113	-3.35488	PG1_0-PG1_GMTP
ENSMUSG00000039031.16	Arhgap18	0.146459	6.76568	2.77705	0.0163138	0.258346	-3.60886	PG1_0-PG1_GMTP
ENSMUSG00000050271.12	Prag1	-0.393802	2.53659	-2.77642	0.016333	0.258468	-3.20187	PG1_0-PG1_GMTP
ENSMUSG00000064368.1	mt-Nd6	0.266332	6.81207	2.77604	0.0163448	0.25847	-3.61204	PG1_0-PG1_GMTP
ENSMUSG00000009185.2	Ccl8	-0.820359	-0.996352	-2.77442	0.0163945	0.259073	-2.90176	PG1_0-PG1_GMTP
ENSMUSG00000044783.16	Hjurp	-0.203939	5.43824	-2.77393	0.0164097	0.25913	-3.56006	PG1_0-PG1_GMTP
ENSMUSG00000008822.15	Acyp1	0.315364	2.4616	2.7723	0.01646	0.259614	-3.19736	PG1_0-PG1_GMTP
ENSMUSG00000087635.3	Gm13414	-0.8934	-1.63811	-2.77154	0.0164834	0.259614	-2.93076	PG1_0-PG1_GMTP
ENSMUSG00000105434.1	Gm43359	-2.27457	-6.05309	-2.77154	0.0164836	0.259614	-3.55313	PG1_0-PG1_GMTP
ENSMUSG00000022148.16	Fyb	-0.232042	9.05274	-2.77095	0.0165016	0.259614	-3.65968	PG1_0-PG1_GMTP
ENSMUSG00000109216.1	Gm44907	2.36913	-6.99787	2.77072	0.0165088	0.259614	-3.66525	PG1_0-PG1_GMTP
ENSMUSG00000020681.14	Ace	0.528275	-0.474069	2.77068	0.0165102	0.259614	-2.90941	PG1_0-PG1_GMTP
ENSMUSG00000087685.1	1700122E12Rik	1.32605	-3.58536	2.76984	0.0165363	0.259841	-3.1913	PG1_0-PG1_GMTP
ENSMUSG00000022610.10	Mapk12	2.10393	-3.46912	2.76682	0.0166303	0.261135	-3.17222	PG1_0-PG1_GMTP
ENSMUSG00000024334.9	H2-Oa	-1.07361	-0.86691	-2.76586	0.0166601	0.261358	-2.91304	PG1_0-PG1_GMTP
ENSMUSG00000038370.6	Pcp4l1	-0.177159	5.99776	-2.76561	0.016668	0.261358	-3.60251	PG1_0-PG1_GMTP
ENSMUSG00000052087.14	Rgs14	-0.21658	5.12482	-2.76446	0.0167042	0.261741	-3.5576	PG1_0-PG1_GMTP
ENSMUSG00000092569.1	Gm20544	0.915017	-2.1431	2.76181	0.0167873	0.262859	-2.98403	PG1_0-PG1_GMTP
ENSMUSG00000084979.1	Gm16267	2.42953	-6.32756	2.76014	0.01684	0.263209	-3.59474	PG1_0-PG1_GMTP
ENSMUSG00000063611.5	Gm10134	-0.410229	2.17348	-2.76004	0.0168432	0.263209	-3.17508	PG1_0-PG1_GMTP
ENSMUSG00000085828.1	Gm15612	-2.69244	-7.24969	-2.75946	0.0168616	0.263209	-3.69837	PG1_0-PG1_GMTP
ENSMUSG00000079076.2	Gm3086	1.75	-4.70523	2.75941	0.0168631	0.263209	-3.3793	PG1_0-PG1_GMTP
ENSMUSG00000059089.4	Fcgr4	-0.165177	7.33294	-2.75887	0.0168801	0.263209	-3.65657	PG1_0-PG1_GMTP
ENSMUSG00000074417.9	Gm14548	-0.273866	4.14129	-2.75886	0.0168804	0.263209	-3.47525	PG1_0-PG1_GMTP
ENSMUSG00000104708.1	Gm42503	-3.65316	-6.5449	-2.75782	0.0169133	0.263538	-3.62206	PG1_0-PG1_GMTP
ENSMUSG00000037331.15	Larp1	-0.138581	7.30683	-2.75628	0.0169625	0.264073	-3.66067	PG1_0-PG1_GMTP
ENSMUSG00000038866.15	Zcchc2	-0.212039	5.89053	-2.756	0.0169713	0.264073	-3.61523	PG1_0-PG1_GMTP
ENSMUSG00000040010.10	Slc7a5	-0.38097	1.63583	-2.75519	0.0169972	0.264291	-3.10891	PG1_0-PG1_GMTP
ENSMUSG00000117805.1	Gm18280	3.48095	-6.94673	2.75414	0.0170307	0.264492	-3.66956	PG1_0-PG1_GMTP
ENSMUSG00000062064.6	Slc2a7	-2.97434	-7.23169	-2.75388	0.017039	0.264492	-3.69975	PG1_0-PG1_GMTP
ENSMUSG00000021236.16	Entpd5	0.18774	4.87921	2.75367	0.0170456	0.264492	-3.55893	PG1_0-PG1_GMTP
ENSMUSG00000020464.15	Pnpt1	-0.199711	5.07895	-2.75233	0.0170885	0.264973	-3.57624	PG1_0-PG1_GMTP
ENSMUSG00000078486.3	Perm1	-0.353617	2.67973	-2.74988	0.0171671	0.266007	-3.27123	PG1_0-PG1_GMTP
ENSMUSG00000114977.1	Gm9502	1.99856	-6.36947	2.74874	0.0172039	0.266392	-3.6072	PG1_0-PG1_GMTP
ENSMUSG00000028551.14	Cdkn2c	-0.233515	4.23566	-2.74825	0.0172199	0.266455	-3.50554	PG1_0-PG1_GMTP
ENSMUSG00000001403.13	Ube2c	-0.24567	3.18011	-2.74638	0.0172802	0.266739	-3.35832	PG1_0-PG1_GMTP
ENSMUSG00000020091.15	Eif4ebp2	0.129934	7.56906	2.74625	0.0172845	0.266739	-3.68456	PG1_0-PG1_GMTP
ENSMUSG00000104818.1	Gm43661	-1.14254	-2.46944	-2.74622	0.0172856	0.266739	-3.03884	PG1_0-PG1_GMTP
ENSMUSG00000043300.2	B3galnt1	-0.179051	5.14733	-2.7462	0.0172861	0.266739	-3.59206	PG1_0-PG1_GMTP
ENSMUSG00000029669.14	Tspan12	2.75243	-4.34874	2.74411	0.0173541	0.267492	-3.34071	PG1_0-PG1_GMTP
ENSMUSG00000034765.6	Dusp5	0.605251	0.134408	2.74359	0.0173709	0.267492	-2.97867	PG1_0-PG1_GMTP
ENSMUSG00000042492.12	Tbc1d10b	-0.155163	7.24316	-2.74359	0.0173709	0.267492	-3.68213	PG1_0-PG1_GMTP
ENSMUSG00000047712.8	Ust	-0.304092	3.14206	-2.74112	0.0174516	0.26855	-3.36148	PG1_0-PG1_GMTP
ENSMUSG00000073557.12	Ppp1r12b	-0.275941	3.30291	-2.74027	0.0174794	0.268718	-3.3888	PG1_0-PG1_GMTP
ENSMUSG00000086213.2	A330040F15Rik	-0.77777	-0.550194	-2.74005	0.0174866	0.268718	-2.95437	PG1_0-PG1_GMTP
ENSMUSG00000110824.1	Gm48677	3.15701	-6.37467	2.73922	0.017514	0.268953	-3.614	PG1_0-PG1_GMTP
ENSMUSG00000098098.7	Bvht	0.328634	1.65876	2.73869	0.0175313	0.269035	-3.14008	PG1_0-PG1_GMTP
ENSMUSG00000006235.6	Epor	0.650211	0.477238	2.73669	0.0175972	0.26986	-3.01522	PG1_0-PG1_GMTP
ENSMUSG00000015950.13	Ncf1	-0.129231	8.46056	-2.73623	0.0176125	0.269864	-3.71695	PG1_0-PG1_GMTP
ENSMUSG00000042549.10	Map2k3os	-0.449651	0.624088	-2.73595	0.0176217	0.269864	-3.0292	PG1_0-PG1_GMTP
ENSMUSG00000026832.12	Cytip	0.234538	4.85451	2.73104	0.0177846	0.271523	-3.59764	PG1_0-PG1_GMTP
ENSMUSG00000017631.19	Abr	-0.15172	8.78428	-2.73095	0.0177876	0.271523	-3.72993	PG1_0-PG1_GMTP
ENSMUSG00000002881.14	Nab1	-0.167434	6.27887	-2.73087	0.0177904	0.271523	-3.67641	PG1_0-PG1_GMTP
ENSMUSG00000023952.13	Gtpbp2	-0.139838	6.78894	-2.7308	0.0177928	0.271523	-3.69327	PG1_0-PG1_GMTP
ENSMUSG00000118439.1	Gm50468	2.69524	-7.26733	2.73078	0.0177932	0.271523	-3.71662	PG1_0-PG1_GMTP
ENSMUSG00000049939.6	Lrrc4	-0.725854	-0.75425	-2.73049	0.017803	0.271523	-2.96575	PG1_0-PG1_GMTP
ENSMUSG00000034993.7	Vat1	0.173871	9.78272	2.72892	0.0178555	0.272103	-3.73944	PG1_0-PG1_GMTP
ENSMUSG00000031628.9	Casp3	-0.140754	5.45269	-2.72862	0.0178654	0.272103	-3.64265	PG1_0-PG1_GMTP
ENSMUSG00000004864.13	Mapk13	-4.00519	-6.10944	-2.72817	0.0178805	0.272129	-3.58952	PG1_0-PG1_GMTP
ENSMUSG00000097572.2	Gm26797	-0.589889	0.244086	-2.72785	0.0178915	0.272129	-3.01134	PG1_0-PG1_GMTP
ENSMUSG00000104786.1	Gm43573	-1.29646	-2.86964	-2.72615	0.0179486	0.272811	-3.11546	PG1_0-PG1_GMTP
ENSMUSG00000051517.14	Arhgef39	-0.393407	1.39417	-2.72575	0.0179618	0.272827	-3.12843	PG1_0-PG1_GMTP
ENSMUSG00000010751.15	Tnfrsf22	0.376507	1.85643	2.72463	0.0179996	0.273214	-3.19083	PG1_0-PG1_GMTP
ENSMUSG00000048728.15	Zfp454	3.21711	-7.09373	2.72368	0.0180317	0.273464	-3.70314	PG1_0-PG1_GMTP
ENSMUSG00000097403.2	9230116N13Rik	-0.644944	0.131356	-2.72342	0.0180405	0.273464	-3.0106	PG1_0-PG1_GMTP
ENSMUSG00000113660.1	Gm5626	3.05456	-6.79229	2.72179	0.0180959	0.273962	-3.67241	PG1_0-PG1_GMTP
ENSMUSG00000064090.14	Vrk2	-0.206253	4.96239	-2.72172	0.0180979	0.273962	-3.62302	PG1_0-PG1_GMTP
ENSMUSG00000028441.12	1110017D15Rik	-2.29254	-5.69675	-2.72009	0.0181536	0.274618	-3.54388	PG1_0-PG1_GMTP
ENSMUSG00000055691.5	Gja6	2.94179	-5.72125	2.71936	0.0181783	0.274805	-3.54749	PG1_0-PG1_GMTP
ENSMUSG00000040195.11	Nemp1	-0.218263	3.99598	-2.71868	0.0182013	0.274919	-3.5288	PG1_0-PG1_GMTP
ENSMUSG00000029415.4	Sdad1	-0.225214	4.3228	-2.71842	0.0182105	0.274919	-3.56905	PG1_0-PG1_GMTP
ENSMUSG00000060594.6	Layn	0.300344	2.7771	2.71792	0.0182274	0.274988	-3.34319	PG1_0-PG1_GMTP
ENSMUSG00000034173.13	Zbed5	0.712257	-1.27513	2.71748	0.0182426	0.275032	-2.98975	PG1_0-PG1_GMTP
ENSMUSG00000108657.1	Gm35611	2.79087	-7.16781	2.71501	0.018327	0.276051	-3.71577	PG1_0-PG1_GMTP
ENSMUSG00000044469.8	Tnfaip8l1	-0.303506	1.36576	-2.71478	0.018335	0.276051	-3.14348	PG1_0-PG1_GMTP
ENSMUSG00000050069.3	Grem2	2.34899	-3.57121	2.71345	0.0183808	0.276554	-3.24541	PG1_0-PG1_GMTP
ENSMUSG00000114309.1	Gm48295	2.79531	-7.20875	2.71237	0.0184181	0.276929	-3.72141	PG1_0-PG1_GMTP
ENSMUSG00000008540.11	Mgst1	0.163945	6.25142	2.71135	0.0184532	0.277271	-3.71059	PG1_0-PG1_GMTP
ENSMUSG00000032352.16	Lrrc1	0.314378	1.29951	2.70964	0.0185124	0.277973	-3.14415	PG1_0-PG1_GMTP
ENSMUSG00000079242.2	C730034F03Rik	1.39294	-2.46346	2.70749	0.0185872	0.278908	-3.08555	PG1_0-PG1_GMTP
ENSMUSG00000040140.15	Tdrd6	-1.24957	-4.88216	-2.70639	0.0186254	0.279251	-3.4476	PG1_0-PG1_GMTP
ENSMUSG00000118651.1	CT030740.1	3.29854	-6.36389	2.70611	0.0186351	0.279251	-3.63431	PG1_0-PG1_GMTP
ENSMUSG00000102841.1	Gm38036	2.79078	-6.61482	2.70268	0.0187554	0.280765	-3.66482	PG1_0-PG1_GMTP
ENSMUSG00000105112.1	Gm42778	2.39265	-5.61055	2.70251	0.0187613	0.280765	-3.54569	PG1_0-PG1_GMTP
ENSMUSG00000077457.1	Snord65	2.61365	-5.68191	2.70092	0.0188173	0.281129	-3.55581	PG1_0-PG1_GMTP
ENSMUSG00000064899.1	Snord118	-2.2748	-7.38486	-2.70077	0.0188227	0.281129	-3.7452	PG1_0-PG1_GMTP
ENSMUSG00000000078.7	Klf6	-0.125256	8.67445	-2.70075	0.0188234	0.281129	-3.78345	PG1_0-PG1_GMTP
ENSMUSG00000095845.3	Gm5741	-3.67075	-6.46164	-2.6998	0.0188568	0.281439	-3.64953	PG1_0-PG1_GMTP
ENSMUSG00000026822.14	Lcn2	-0.630157	-0.419978	-2.69863	0.018898	0.281596	-3.02116	PG1_0-PG1_GMTP
ENSMUSG00000082345.1	Gm13622	2.94039	-5.62527	2.69846	0.0189041	0.281596	-3.55049	PG1_0-PG1_GMTP
ENSMUSG00000016940.18	Kctd2	0.236302	4.74858	2.69828	0.0189107	0.281596	-3.64761	PG1_0-PG1_GMTP
ENSMUSG00000034312.15	Iqsec1	0.153773	7.29934	2.69796	0.018922	0.281596	-3.76588	PG1_0-PG1_GMTP
ENSMUSG00000027326.13	Knl1	-0.427375	2.21362	-2.6977	0.0189311	0.281596	-3.28912	PG1_0-PG1_GMTP
ENSMUSG00000038619.12	Ensa	-0.133475	7.84498	-2.69731	0.0189449	0.281596	-3.77822	PG1_0-PG1_GMTP
ENSMUSG00000026797.16	Stxbp1	-0.202796	5.36549	-2.69701	0.0189557	0.281596	-3.69451	PG1_0-PG1_GMTP
ENSMUSG00000102644.5	Thap6	0.250039	3.16807	2.69546	0.0190108	0.282228	-3.44643	PG1_0-PG1_GMTP
ENSMUSG00000039601.16	Rcan2	2.29669	-5.21185	2.69417	0.0190567	0.282722	-3.50094	PG1_0-PG1_GMTP
ENSMUSG00000044206.3	Vsig4	0.521651	0.957038	2.69351	0.0190802	0.282882	-3.13215	PG1_0-PG1_GMTP
ENSMUSG00000117488.1	Gm41545	-2.55386	-6.83659	-2.69177	0.0191426	0.283591	-3.69552	PG1_0-PG1_GMTP
ENSMUSG00000066456.14	Hmgn3	-0.324906	2.56068	-2.69146	0.0191535	0.283591	-3.35429	PG1_0-PG1_GMTP
ENSMUSG00000118258.1	Gm19076	-0.883359	-1.39415	-2.69073	0.0191799	0.283695	-3.031	PG1_0-PG1_GMTP
ENSMUSG00000106706.1	C530043K16Rik	2.79083	-6.90365	2.69056	0.0191859	0.283695	-3.70325	PG1_0-PG1_GMTP
ENSMUSG00000021039.9	Snw1	-0.126053	6.33865	-2.68937	0.0192286	0.284137	-3.75334	PG1_0-PG1_GMTP
ENSMUSG00000115702.1	Gm5206	-2.27469	-6.78699	-2.68842	0.0192631	0.284352	-3.69235	PG1_0-PG1_GMTP
ENSMUSG00000030772.6	Dkk3	-0.538842	0.197315	-2.68826	0.0192686	0.284352	-3.07122	PG1_0-PG1_GMTP
ENSMUSG00000106390.1	Gm5551	-2.69239	-7.20875	-2.68767	0.0192901	0.284481	-3.73575	PG1_0-PG1_GMTP
ENSMUSG00000030214.7	Plbd1	-0.311927	2.26642	-2.68561	0.0193645	0.2853	-3.3181	PG1_0-PG1_GMTP
ENSMUSG00000111594.1	Gm3365	-0.535307	0.700777	-2.68543	0.0193712	0.2853	-3.11912	PG1_0-PG1_GMTP
ENSMUSG00000110574.1	Gm21112	-2.87595	-4.46629	-2.68495	0.0193885	0.285367	-3.40909	PG1_0-PG1_GMTP
ENSMUSG00000066838.7	Zfp772	0.375022	1.91471	2.68388	0.0194272	0.285747	-3.26893	PG1_0-PG1_GMTP
ENSMUSG00000029640.17	Usp12	-0.126829	6.7228	-2.68211	0.0194918	0.286348	-3.77908	PG1_0-PG1_GMTP
ENSMUSG00000030541.16	Idh2	0.148833	5.54979	2.68186	0.0195009	0.286348	-3.73208	PG1_0-PG1_GMTP
ENSMUSG00000006517.5	Mvd	-0.254448	4.52675	-2.68171	0.0195065	0.286348	-3.65641	PG1_0-PG1_GMTP
ENSMUSG00000027115.14	Kif18a	-0.488857	0.930936	-2.68107	0.0195299	0.286502	-3.14994	PG1_0-PG1_GMTP
ENSMUSG00000074657.5	Kif5a	-0.300121	2.68057	-2.67892	0.0196086	0.287468	-3.39563	PG1_0-PG1_GMTP
ENSMUSG00000045690.8	Wdr89	0.425052	1.45859	2.67764	0.0196554	0.287794	-3.21778	PG1_0-PG1_GMTP
ENSMUSG00000025780.7	Itih5	-3.12262	-6.39296	-2.67761	0.0196566	0.287794	-3.65619	PG1_0-PG1_GMTP
ENSMUSG00000030613.13	Ccdc90b	0.225159	3.91261	2.67708	0.0196761	0.28789	-3.59196	PG1_0-PG1_GMTP
ENSMUSG00000040918.12	Slc19a2	-0.195598	3.41995	-2.67522	0.0197448	0.288672	-3.52275	PG1_0-PG1_GMTP
ENSMUSG00000041817.14	Fam169a	1.18337	-2.37627	2.67493	0.0197554	0.288672	-3.11649	PG1_0-PG1_GMTP
ENSMUSG00000024295.9	Cyp4f41-ps	0.621165	-0.698389	2.67424	0.0197809	0.288811	-3.0505	PG1_0-PG1_GMTP
ENSMUSG00000036362.2	P2ry13	-0.279744	2.96456	-2.67397	0.0197908	0.288811	-3.45095	PG1_0-PG1_GMTP
ENSMUSG00000089762.3	Ier5l	0.367858	2.72211	2.67252	0.0198449	0.289271	-3.41366	PG1_0-PG1_GMTP
ENSMUSG00000101320.1	Gm28529	-1.22678	-3.0571	-2.67242	0.0198483	0.289271	-3.20353	PG1_0-PG1_GMTP
ENSMUSG00000020476.14	Dbnl	-0.185575	7.25066	-2.67172	0.0198744	0.289463	-3.81196	PG1_0-PG1_GMTP
ENSMUSG00000004665.10	Cnn2	0.167685	4.73388	2.67119	0.0198942	0.289562	-3.69481	PG1_0-PG1_GMTP
ENSMUSG00000001552.14	Jup	0.240295	4.35363	2.66948	0.0199579	0.290301	-3.65989	PG1_0-PG1_GMTP
ENSMUSG00000018654.17	Ikzf1	-0.139735	6.72199	-2.66872	0.0199865	0.290527	-3.80314	PG1_0-PG1_GMTP
ENSMUSG00000025648.18	Pfkfb4	-0.148451	6.07456	-2.66734	0.0200381	0.291088	-3.78281	PG1_0-PG1_GMTP
ENSMUSG00000025432.11	Avil	-2.65903	-5.52536	-2.66642	0.0200723	0.291254	-3.5616	PG1_0-PG1_GMTP
ENSMUSG00000114270.1	Gm48746	3.03486	-7.12784	2.66608	0.0200853	0.291254	-3.74046	PG1_0-PG1_GMTP
ENSMUSG00000026107.11	Nabp1	-0.157855	7.04088	-2.66599	0.0200887	0.291254	-3.81702	PG1_0-PG1_GMTP
ENSMUSG00000046167.5	Gldn	2.30296	-6.26611	2.66515	0.0201202	0.291343	-3.6501	PG1_0-PG1_GMTP
ENSMUSG00000039512.12	Uhrf1bp1	-0.254514	5.75225	-2.66494	0.020128	0.291343	-3.77274	PG1_0-PG1_GMTP
ENSMUSG00000037989.15	Wnk2	-1.28817	-1.72968	-2.66473	0.0201359	0.291343	-3.08086	PG1_0-PG1_GMTP
ENSMUSG00000024659.15	Anxa1	0.126404	11.3353	2.66371	0.0201744	0.291343	-3.85462	PG1_0-PG1_GMTP
ENSMUSG00000037370.13	Enpp1	0.157275	4.61824	2.66357	0.0201797	0.291343	-3.69762	PG1_0-PG1_GMTP
ENSMUSG00000081769.9	Gm12216	-0.499803	0.386895	-2.66332	0.0201892	0.291343	-3.12626	PG1_0-PG1_GMTP
ENSMUSG00000114759.1	Gm10257	1.15675	-2.05298	2.66308	0.0201983	0.291343	-3.10345	PG1_0-PG1_GMTP
ENSMUSG00000020256.14	Aldh1l2	-0.705579	-2.10746	-2.66305	0.0201993	0.291343	-3.10765	PG1_0-PG1_GMTP
ENSMUSG00000021363.14	Mak	-0.315446	1.5997	-2.66107	0.0202744	0.292236	-3.26425	PG1_0-PG1_GMTP
ENSMUSG00000038058.14	Nod1	-0.176624	4.95476	-2.65941	0.0203373	0.292955	-3.73416	PG1_0-PG1_GMTP
ENSMUSG00000022831.14	Hcls1	-0.164122	8.67854	-2.65875	0.0203624	0.293126	-3.85912	PG1_0-PG1_GMTP
ENSMUSG00000022265.7	Ank	0.152889	6.07001	2.65697	0.0204302	0.293914	-3.80121	PG1_0-PG1_GMTP
ENSMUSG00000106115.1	Gm43420	-1.89955	-5.05615	-2.65572	0.0204781	0.294413	-3.51112	PG1_0-PG1_GMTP
ENSMUSG00000000318.16	Clec10a	0.270834	1.81067	2.65493	0.0205083	0.294656	-3.30363	PG1_0-PG1_GMTP
ENSMUSG00000112944.1	Gm48885	-3.38346	-6.56684	-2.65446	0.0205265	0.294729	-3.69015	PG1_0-PG1_GMTP
ENSMUSG00000101880.1	Gm29282	-2.6816	-5.66706	-2.65342	0.0205664	0.295112	-3.58836	PG1_0-PG1_GMTP
ENSMUSG00000078771.10	Evi2a	-0.13441	7.7471	-2.653	0.0205825	0.295152	-3.85618	PG1_0-PG1_GMTP
ENSMUSG00000097386.1	9130213A22Rik	3.06579	-5.58727	2.65262	0.0205972	0.295173	-3.57932	PG1_0-PG1_GMTP
ENSMUSG00000094112.2	9330182O14Rik	-1.4439	-3.93178	-2.6516	0.0206364	0.295546	-3.36509	PG1_0-PG1_GMTP
ENSMUSG00000020184.15	Mdm2	-0.127061	7.24828	-2.64927	0.0207264	0.296562	-3.85222	PG1_0-PG1_GMTP
ENSMUSG00000085861.1	Armh2	-2.69208	-6.94459	-2.64883	0.0207434	0.296562	-3.73267	PG1_0-PG1_GMTP
ENSMUSG00000035064.17	Eef2k	0.217231	4.25172	2.64847	0.0207574	0.296562	-3.68572	PG1_0-PG1_GMTP
ENSMUSG00000055675.6	Kbtbd11	2.21255	-3.64803	2.64828	0.0207649	0.296562	-3.32399	PG1_0-PG1_GMTP
ENSMUSG00000017002.14	Slpi	-0.493359	0.316667	-2.64805	0.0207738	0.296562	-3.14483	PG1_0-PG1_GMTP
ENSMUSG00000041037.8	Irgq	0.177526	5.23403	2.64697	0.0208158	0.296971	-3.77593	PG1_0-PG1_GMTP
ENSMUSG00000089952.1	4933413C19Rik	2.36908	-7.30297	2.64635	0.02084	0.296978	-3.76861	PG1_0-PG1_GMTP
ENSMUSG00000032066.9	Bco2	-0.514504	0.947236	-2.64569	0.0208656	0.296978	-3.21019	PG1_0-PG1_GMTP
ENSMUSG00000067642.11	Adgrf3	-2.27442	-5.16738	-2.64521	0.0208846	0.296978	-3.53338	PG1_0-PG1_GMTP
ENSMUSG00000039157.12	Fam102a	-0.233492	4.29817	-2.64504	0.0208909	0.296978	-3.69727	PG1_0-PG1_GMTP
ENSMUSG00000057604.9	Lmcd1	-3.10315	-3.6072	-2.64501	0.0208921	0.296978	-3.32044	PG1_0-PG1_GMTP
ENSMUSG00000039294.14	Cybc1	-0.135678	6.38723	-2.64491	0.0208961	0.296978	-3.83487	PG1_0-PG1_GMTP
ENSMUSG00000065765.1	Gm23851	-1.31414	-3.23906	-2.64089	0.0210538	0.298341	-3.26529	PG1_0-PG1_GMTP
ENSMUSG00000049848.7	Ceacam19	-0.206736	3.84622	-2.64086	0.0210548	0.298341	-3.64719	PG1_0-PG1_GMTP
ENSMUSG00000034156.16	Tspoap1	-0.599859	-0.595226	-2.64073	0.0210601	0.298341	-3.10331	PG1_0-PG1_GMTP
ENSMUSG00000030329.11	Pianp	0.160077	5.84232	2.64067	0.0210623	0.298341	-3.8205	PG1_0-PG1_GMTP
ENSMUSG00000035513.19	Ntng2	0.320444	1.61619	2.63997	0.0210901	0.298341	-3.3022	PG1_0-PG1_GMTP
ENSMUSG00000026383.14	Epb41l5	-0.673254	-0.548085	-2.63983	0.0210956	0.298341	-3.10618	PG1_0-PG1_GMTP
ENSMUSG00000020649.11	Rrm2	-0.221975	3.73127	-2.63969	0.0211009	0.298341	-3.6329	PG1_0-PG1_GMTP
ENSMUSG00000038253.6	Hoxa5	2.36939	-5.45848	2.63957	0.0211055	0.298341	-3.57343	PG1_0-PG1_GMTP
ENSMUSG00000031906.9	Smpd3	0.335216	2.23679	2.63906	0.0211257	0.298341	-3.39387	PG1_0-PG1_GMTP
ENSMUSG00000087596.1	Gm11715	2.45715	-6.15101	2.63886	0.0211337	0.298341	-3.65478	PG1_0-PG1_GMTP
ENSMUSG00000034165.16	Ccnd3	-0.200449	5.08951	-2.63805	0.0211657	0.298341	-3.78203	PG1_0-PG1_GMTP
ENSMUSG00000038793.8	Lefty1	-1.39467	-2.39384	-2.63753	0.0211863	0.298341	-3.16447	PG1_0-PG1_GMTP
ENSMUSG00000017756.9	Slc12a7	-0.187241	6.18003	-2.63742	0.0211907	0.298341	-3.8406	PG1_0-PG1_GMTP
ENSMUSG00000046805.10	Mpeg1	-0.122454	12.978	-2.63715	0.0212015	0.298341	-3.88883	PG1_0-PG1_GMTP
ENSMUSG00000004187.11	Kifc2	0.432915	1.21474	2.6363	0.0212349	0.298341	-3.2568	PG1_0-PG1_GMTP
ENSMUSG00000021483.8	Cdk20	0.150611	5.59788	2.63628	0.0212359	0.298341	-3.8163	PG1_0-PG1_GMTP
ENSMUSG00000040964.16	Arhgef10l	-0.153693	6.65609	-2.63614	0.0212413	0.298341	-3.85952	PG1_0-PG1_GMTP
ENSMUSG00000098534.1	Gm27167	2.01802	-3.70009	2.63605	0.0212449	0.298341	-3.34477	PG1_0-PG1_GMTP
ENSMUSG00000038943.16	Prc1	-0.337904	3.30241	-2.63602	0.0212461	0.298341	-3.57291	PG1_0-PG1_GMTP
ENSMUSG00000020409.10	Slu7	-0.122379	6.53355	-2.63542	0.0212698	0.298487	-3.85687	PG1_0-PG1_GMTP
ENSMUSG00000087135.7	Gm16096	-2.45664	-5.49202	-2.63403	0.0213252	0.299031	-3.58161	PG1_0-PG1_GMTP
ENSMUSG00000117704.1	Gm50273	3.21724	-6.37532	2.63377	0.0213354	0.299031	-3.68288	PG1_0-PG1_GMTP
ENSMUSG00000027007.16	Itprid2	-0.142138	7.96044	-2.63279	0.0213747	0.299306	-3.89618	PG1_0-PG1_GMTP
ENSMUSG00000050545.10	Fam228b	1.6952	-3.70452	2.63236	0.0213917	0.299306	-3.34913	PG1_0-PG1_GMTP
ENSMUSG00000025221.16	Kcnip2	-3.14296	-6.66653	-2.63192	0.0214093	0.299306	-3.71486	PG1_0-PG1_GMTP
ENSMUSG00000021928.9	Ebpl	0.255914	3.79947	2.63141	0.02143	0.299306	-3.65731	PG1_0-PG1_GMTP
ENSMUSG00000028480.14	Glipr2	-0.334256	1.51455	-2.63129	0.0214345	0.299306	-3.30324	PG1_0-PG1_GMTP
ENSMUSG00000037628.10	Cdkn3	-0.381778	1.0494	-2.63127	0.0214355	0.299306	-3.24564	PG1_0-PG1_GMTP
ENSMUSG00000087362.7	Gm13710	-0.264617	2.66167	-2.63093	0.0214491	0.299308	-3.47611	PG1_0-PG1_GMTP
ENSMUSG00000097370.2	4930467K11Rik	-2.27472	-6.95693	-2.63059	0.0214627	0.299311	-3.74492	PG1_0-PG1_GMTP
ENSMUSG00000021273.11	Fdft1	-0.226355	3.8996	-2.6299	0.0214904	0.29951	-3.67392	PG1_0-PG1_GMTP
ENSMUSG00000041801.5	Phlda3	-0.286534	3.83198	-2.6289	0.0215304	0.29988	-3.66635	PG1_0-PG1_GMTP
ENSMUSG00000083900.2	Gm13294	3.24697	-6.74131	2.62788	0.0215715	0.300264	-3.72506	PG1_0-PG1_GMTP
ENSMUSG00000102837.1	Gm37383	3.06232	-6.72162	2.62669	0.0216196	0.300746	-3.7238	PG1_0-PG1_GMTP
ENSMUSG00000021650.7	Ptcd2	-0.165177	4.81674	-2.62537	0.0216729	0.301119	-3.78364	PG1_0-PG1_GMTP
ENSMUSG00000055805.15	Fmnl1	-0.128849	7.4768	-2.62536	0.0216734	0.301119	-3.90028	PG1_0-PG1_GMTP
ENSMUSG00000101172.1	Gm28535	2.7169	-5.31687	2.62465	0.0217021	0.301127	-3.56762	PG1_0-PG1_GMTP
ENSMUSG00000107355.1	AI839979	-0.290356	2.92625	-2.62463	0.0217031	0.301127	-3.53097	PG1_0-PG1_GMTP
ENSMUSG00000031429.14	Psmd10	-0.166091	5.44056	-2.62435	0.0217144	0.301127	-3.82895	PG1_0-PG1_GMTP
ENSMUSG00000117030.1	Gm49959	-2.41027	-4.93117	-2.62364	0.0217431	0.301338	-3.52116	PG1_0-PG1_GMTP
ENSMUSG00000035279.8	Ssc5d	-0.481795	1.78366	-2.62292	0.0217723	0.301555	-3.35429	PG1_0-PG1_GMTP
ENSMUSG00000034487.4	Poglut3	0.154978	4.28318	2.62098	0.0218513	0.302326	-3.73825	PG1_0-PG1_GMTP
ENSMUSG00000078780.7	Gm5150	-0.224864	3.89613	-2.62089	0.021855	0.302326	-3.6894	PG1_0-PG1_GMTP
ENSMUSG00000029234.13	Tmem165	0.176883	6.52939	2.62042	0.021874	0.302401	-3.88356	PG1_0-PG1_GMTP
ENSMUSG00000029348.11	Asphd2	2.36938	-5.50864	2.61939	0.0219162	0.302528	-3.59449	PG1_0-PG1_GMTP
ENSMUSG00000058183.14	Mmel1	4.2222	-6.47169	2.61893	0.021935	0.302528	-3.70282	PG1_0-PG1_GMTP
ENSMUSG00000105741.1	C79130	-0.514057	-1.07264	-2.61871	0.0219443	0.302528	-3.12832	PG1_0-PG1_GMTP
ENSMUSG00000035299.16	Mid1	-0.501363	1.85331	-2.61864	0.0219472	0.302528	-3.37152	PG1_0-PG1_GMTP
ENSMUSG00000060477.14	Irak2	-0.159355	6.08274	-2.61851	0.0219525	0.302528	-3.87055	PG1_0-PG1_GMTP
ENSMUSG00000047988.1	4933428G20Rik	-2.6752	-5.19584	-2.6181	0.021969	0.302528	-3.55804	PG1_0-PG1_GMTP
ENSMUSG00000013974.3	Mcemp1	-0.810808	0.369363	-2.61767	0.0219866	0.302528	-3.19804	PG1_0-PG1_GMTP
ENSMUSG00000029231.15	Pdgfra	0.950993	-0.752056	2.61755	0.0219917	0.302528	-3.13378	PG1_0-PG1_GMTP
ENSMUSG00000038467.15	Chmp4b	-0.179714	8.47676	-2.61551	0.0220755	0.30334	-3.93444	PG1_0-PG1_GMTP
ENSMUSG00000022790.14	Igsf11	-0.460003	1.1019	-2.61511	0.0220921	0.30334	-3.27852	PG1_0-PG1_GMTP
ENSMUSG00000117250.1	Gm49871	-1.06836	-2.54681	-2.61473	0.0221079	0.30334	-3.20722	PG1_0-PG1_GMTP
ENSMUSG00000020015.10	Cdk17	0.179124	4.91702	2.61434	0.0221238	0.30334	-3.81153	PG1_0-PG1_GMTP
ENSMUSG00000020330.16	Hmmr	-0.28587	2.84215	-2.6141	0.0221337	0.30334	-3.53536	PG1_0-PG1_GMTP
ENSMUSG00000104642.1	Gm9207	-2.74267	-3.5317	-2.61354	0.0221569	0.30334	-3.33998	PG1_0-PG1_GMTP
ENSMUSG00000118196.1	Gm29946	2.79084	-6.8419	2.61299	0.0221796	0.30334	-3.74434	PG1_0-PG1_GMTP
ENSMUSG00000110816.1	Gm19178	-2.92626	-4.98932	-2.61284	0.022186	0.30334	-3.53706	PG1_0-PG1_GMTP
ENSMUSG00000027331.15	Knstrn	-0.28581	3.49783	-2.61269	0.0221921	0.30334	-3.64532	PG1_0-PG1_GMTP
ENSMUSG00000053081.3	1700069B07Rik	-2.26231	-4.48963	-2.61263	0.0221944	0.30334	-3.47491	PG1_0-PG1_GMTP
ENSMUSG00000056394.17	Lig1	-0.189369	4.62309	-2.61249	0.0222003	0.30334	-3.78904	PG1_0-PG1_GMTP
ENSMUSG00000071796.13	6820431F20Rik	-0.258623	2.38747	-2.61039	0.0222874	0.304211	-3.46702	PG1_0-PG1_GMTP
ENSMUSG00000107763.1	Gm43962	-2.69164	-6.62485	-2.61025	0.0222935	0.304211	-3.72427	PG1_0-PG1_GMTP
ENSMUSG00000014633.15	Cmc2	0.256	2.41062	2.60997	0.0223049	0.304211	-3.47145	PG1_0-PG1_GMTP
ENSMUSG00000019945.10	Cabcoco1	-1.82117	-5.13684	-2.60861	0.0223617	0.304644	-3.55834	PG1_0-PG1_GMTP
ENSMUSG00000037279.13	Ovol2	-2.27465	-6.58671	-2.60855	0.022364	0.304644	-3.72145	PG1_0-PG1_GMTP
ENSMUSG00000068014.5	Gm14648	-2.69051	-5.67284	-2.60771	0.0223992	0.304855	-3.62222	PG1_0-PG1_GMTP
ENSMUSG00000048537.16	Phldb1	0.252777	3.24786	2.60753	0.0224068	0.304855	-3.61406	PG1_0-PG1_GMTP
ENSMUSG00000028437.14	Ubap1	-0.119102	6.68758	-2.60684	0.0224358	0.305064	-3.9129	PG1_0-PG1_GMTP
ENSMUSG00000091177.2	Gm15494	-3.65319	-6.71348	-2.60643	0.0224526	0.305107	-3.73563	PG1_0-PG1_GMTP
ENSMUSG00000015711.8	Prune1	0.188761	4.64324	2.60397	0.022556	0.306324	-3.80608	PG1_0-PG1_GMTP
ENSMUSG00000051906.15	Cd209f	3.25692	-6.74131	2.60168	0.0226526	0.307388	-3.74138	PG1_0-PG1_GMTP
ENSMUSG00000046463.5	5930403N24Rik	-0.512544	1.32348	-2.60075	0.0226919	0.307388	-3.32963	PG1_0-PG1_GMTP
ENSMUSG00000029192.17	Tbc1d14	-0.128425	6.7121	-2.60027	0.0227122	0.307388	-3.92537	PG1_0-PG1_GMTP
ENSMUSG00000031298.15	Adgrg2	2.89184	-5.66917	2.60011	0.0227189	0.307388	-3.62733	PG1_0-PG1_GMTP
ENSMUSG00000031728.10	Zfp821	-0.226402	3.49	-2.60005	0.0227215	0.307388	-3.66629	PG1_0-PG1_GMTP
ENSMUSG00000087163.1	Gm16230	-0.616269	-0.844138	-2.59975	0.0227342	0.307388	-3.15814	PG1_0-PG1_GMTP
ENSMUSG00000004791.7	Pgf	-0.654874	-1.18031	-2.59975	0.0227342	0.307388	-3.15567	PG1_0-PG1_GMTP
ENSMUSG00000026938.10	Fcna	0.282321	3.01574	2.59951	0.0227445	0.307388	-3.5897	PG1_0-PG1_GMTP
ENSMUSG00000030742.7	Lat	0.47888	1.14544	2.59905	0.022764	0.307466	-3.31034	PG1_0-PG1_GMTP
ENSMUSG00000082116.1	Gm12188	-1.73152	-4.06346	-2.59834	0.0227942	0.307587	-3.43294	PG1_0-PG1_GMTP
ENSMUSG00000042190.12	Cmklr1	-0.225401	5.4283	-2.59786	0.0228145	0.307587	-3.87544	PG1_0-PG1_GMTP
ENSMUSG00000023959.10	Clic5	-0.477885	2.43685	-2.59754	0.022828	0.307587	-3.49709	PG1_0-PG1_GMTP
ENSMUSG00000015812.8	Gnrh1	-1.68507	-3.475	-2.59754	0.0228281	0.307587	-3.34739	PG1_0-PG1_GMTP
ENSMUSG00000118157.1	Gm9902	-3.03585	-6.48634	-2.59673	0.0228627	0.307867	-3.7187	PG1_0-PG1_GMTP
ENSMUSG00000020986.13	Sec23a	0.131435	4.77101	2.5934	0.023005	0.309596	-3.83656	PG1_0-PG1_GMTP
ENSMUSG00000017390.15	Aldoc	-0.176423	4.00493	-2.5925	0.0230438	0.3099	-3.75409	PG1_0-PG1_GMTP
ENSMUSG00000024610.15	Cd74	-0.182751	11.7586	-2.59211	0.0230604	0.3099	-3.98033	PG1_0-PG1_GMTP
ENSMUSG00000117903.1	Gm29819	-2.52114	-7.14084	-2.59191	0.0230692	0.3099	-3.78544	PG1_0-PG1_GMTP
ENSMUSG00000055069.3	Rab39	-0.279474	2.54675	-2.59075	0.0231192	0.310385	-3.52677	PG1_0-PG1_GMTP
ENSMUSG00000029209.15	Gnpda2	0.176932	3.69336	2.59002	0.0231504	0.310616	-3.71504	PG1_0-PG1_GMTP
ENSMUSG00000038252.13	Ncapd2	-0.28994	4.20445	-2.58822	0.0232282	0.31126	-3.78682	PG1_0-PG1_GMTP
ENSMUSG00000095385.3	D630033O11Rik	0.756938	-1.49149	2.58776	0.0232483	0.31126	-3.17683	PG1_0-PG1_GMTP
ENSMUSG00000042423.9	Fbrs	-0.130549	6.88038	-2.58773	0.0232497	0.31126	-3.95269	PG1_0-PG1_GMTP
ENSMUSG00000072789.4	Gm10420	2.4199	-6.14027	2.58753	0.0232583	0.31126	-3.68841	PG1_0-PG1_GMTP
ENSMUSG00000022584.14	Ly6c2	-1.23201	-1.48475	-2.5873	0.0232681	0.31126	-3.1773	PG1_0-PG1_GMTP
ENSMUSG00000035785.6	Cmtm2b	-2.42132	-4.53509	-2.58687	0.0232868	0.311323	-3.50288	PG1_0-PG1_GMTP
ENSMUSG00000034063.8	4930590J08Rik	1.18581	-3.01297	2.58654	0.023301	0.311327	-3.29336	PG1_0-PG1_GMTP
ENSMUSG00000002731.6	Prkra	0.14866	4.75761	2.58555	0.0233441	0.311619	-3.84932	PG1_0-PG1_GMTP
ENSMUSG00000053063.11	Clec12a	-0.140704	9.19692	-2.5854	0.0233509	0.311619	-3.99478	PG1_0-PG1_GMTP
ENSMUSG00000019865.9	Nmbr	-2.27478	-7.30297	-2.58497	0.0233694	0.311681	-3.80405	PG1_0-PG1_GMTP
ENSMUSG00000022913.16	Psmg1	0.185967	3.14494	2.58438	0.0233954	0.311718	-3.63754	PG1_0-PG1_GMTP
ENSMUSG00000089267.1	Gm22890	2.47928	-6.04153	2.58418	0.0234038	0.311718	-3.68004	PG1_0-PG1_GMTP
ENSMUSG00000024472.9	Dcp2	-0.265665	6.40995	-2.5835	0.0234335	0.311718	-3.94533	PG1_0-PG1_GMTP
ENSMUSG00000024238.15	Zeb1	-0.325613	2.42046	-2.58336	0.0234397	0.311718	-3.51887	PG1_0-PG1_GMTP
ENSMUSG00000020808.3	Pimreg	-0.406525	2.10006	-2.58313	0.0234497	0.311718	-3.46869	PG1_0-PG1_GMTP
ENSMUSG00000118117.1	Gm30961	-3.1784	-3.28491	-2.58274	0.0234667	0.311718	-3.33438	PG1_0-PG1_GMTP
ENSMUSG00000113216.1	Gm40841	1.6044	-4.18562	2.58267	0.02347	0.311718	-3.46307	PG1_0-PG1_GMTP
ENSMUSG00000053297.14	AI854703	-0.957183	-2.99243	-2.58156	0.0235184	0.312175	-3.29636	PG1_0-PG1_GMTP
ENSMUSG00000026062.12	Slc9a2	1.09525	-2.03486	2.58106	0.0235406	0.312284	-3.20844	PG1_0-PG1_GMTP
ENSMUSG00000084111.4	Gm15710	0.834812	-1.35657	2.58054	0.023563	0.312396	-3.18434	PG1_0-PG1_GMTP
ENSMUSG00000047343.4	Mettl21c	-2.4214	-6.00992	-2.57985	0.0235934	0.312612	-3.67961	PG1_0-PG1_GMTP
ENSMUSG00000026196.7	Bard1	-0.57242	1.20651	-2.57868	0.0236448	0.312859	-3.35162	PG1_0-PG1_GMTP
ENSMUSG00000031995.9	St14	-0.318731	3.20048	-2.57848	0.0236541	0.312859	-3.65709	PG1_0-PG1_GMTP
ENSMUSG00000116617.1	Gm49767	-0.625071	-1.67565	-2.57847	0.0236544	0.312859	-3.19492	PG1_0-PG1_GMTP
ENSMUSG00000107726.1	Gm44037	1.03707	-2.82753	2.57816	0.0236681	0.312859	-3.28054	PG1_0-PG1_GMTP
ENSMUSG00000106357.1	Gm8013	1.89198	-2.58825	2.57607	0.0237605	0.313895	-3.25783	PG1_0-PG1_GMTP
ENSMUSG00000085614.1	1700123M08Rik	0.598509	-0.211537	2.5751	0.0238032	0.314272	-3.22107	PG1_0-PG1_GMTP
ENSMUSG00000118436.1	Gm32880	-2.27479	-7.34391	-2.57406	0.0238496	0.314699	-3.81392	PG1_0-PG1_GMTP
ENSMUSG00000018599.5	Mief2	-0.203782	3.79515	-2.57337	0.0238803	0.31485	-3.75903	PG1_0-PG1_GMTP
ENSMUSG00000047669.8	Msl3l2	-0.316167	2.45696	-2.57316	0.0238893	0.31485	-3.54233	PG1_0-PG1_GMTP
ENSMUSG00000037548.15	H2-DMb2	-0.285639	1.60427	-2.57269	0.0239106	0.314945	-3.41403	PG1_0-PG1_GMTP
ENSMUSG00000038286.11	Bphl	0.176711	3.779	2.57122	0.0239757	0.315587	-3.76046	PG1_0-PG1_GMTP
ENSMUSG00000054252.18	Fgfr3	2.6391	-4.91196	2.57046	0.02401	0.315587	-3.56206	PG1_0-PG1_GMTP
ENSMUSG00000020653.12	Klf11	0.253531	3.08897	2.57035	0.0240147	0.315587	-3.65266	PG1_0-PG1_GMTP
ENSMUSG00000023919.8	Cenpq	-0.566131	1.29949	-2.57033	0.0240159	0.315587	-3.37727	PG1_0-PG1_GMTP
ENSMUSG00000097892.2	Gm26801	1.6533	-3.82958	2.56763	0.0241366	0.316688	-3.43077	PG1_0-PG1_GMTP
ENSMUSG00000038587.10	Akap12	-0.662083	-0.053342	-2.56735	0.0241495	0.316688	-3.24364	PG1_0-PG1_GMTP
ENSMUSG00000015314.10	Slamf6	-0.631407	0.339482	-2.56729	0.0241521	0.316688	-3.27585	PG1_0-PG1_GMTP
ENSMUSG00000004040.16	Stat3	-0.140411	7.37424	-2.56719	0.0241564	0.316688	-4.00181	PG1_0-PG1_GMTP
ENSMUSG00000086424.1	Gm15569	0.830849	-1.99094	2.56629	0.0241969	0.317032	-3.22509	PG1_0-PG1_GMTP
ENSMUSG00000021886.7	Gpr65	-0.176437	5.59725	-2.56582	0.0242181	0.317124	-3.9417	PG1_0-PG1_GMTP
ENSMUSG00000104497.1	Gm10555	2.43849	-6.3028	2.56486	0.0242616	0.317335	-3.7207	PG1_0-PG1_GMTP
ENSMUSG00000113067.1	Gm47166	2.79546	-6.89432	2.56483	0.0242627	0.317335	-3.77889	PG1_0-PG1_GMTP
ENSMUSG00000117653.1	Gm50009	-2.42962	-4.48042	-2.56417	0.0242926	0.31754	-3.51585	PG1_0-PG1_GMTP
ENSMUSG00000023918.12	Adgrf4	2.3692	-6.61088	2.56267	0.0243609	0.318014	-3.75308	PG1_0-PG1_GMTP
ENSMUSG00000063458.13	Lrmda	-0.207278	3.33235	-2.56247	0.0243697	0.318014	-3.70665	PG1_0-PG1_GMTP
ENSMUSG00000017664.16	Slc35c2	-0.119477	5.71628	-2.56243	0.0243716	0.318014	-3.95377	PG1_0-PG1_GMTP
ENSMUSG00000114893.1	Gm48684	-2.46001	-6.84662	-2.56166	0.0244063	0.31816	-3.77637	PG1_0-PG1_GMTP
ENSMUSG00000023004.8	Tuba1b	-0.164734	6.54026	-2.5615	0.0244138	0.31816	-3.98889	PG1_0-PG1_GMTP
ENSMUSG00000030872.14	Gga2	-0.137834	6.53986	-2.56124	0.0244256	0.31816	-3.98934	PG1_0-PG1_GMTP
ENSMUSG00000021552.7	Gkap1	0.182241	3.65065	2.55964	0.0244985	0.31879	-3.76215	PG1_0-PG1_GMTP
ENSMUSG00000040663.9	Clcf1	0.569264	-1.03158	2.55955	0.0245025	0.31879	-3.21384	PG1_0-PG1_GMTP
ENSMUSG00000018143.10	Mafk	-0.158608	5.79123	-2.55798	0.0245742	0.319533	-3.96535	PG1_0-PG1_GMTP
ENSMUSG00000053333.15	Dis3l2	0.183341	4.12883	2.55693	0.0246222	0.319533	-3.83276	PG1_0-PG1_GMTP
ENSMUSG00000092557.1	Gm8696	2.80073	-5.8668	2.55687	0.0246253	0.319533	-3.68028	PG1_0-PG1_GMTP
ENSMUSG00000068962.7	Zfp114	-1.02897	-2.36608	-2.55654	0.0246401	0.319533	-3.26226	PG1_0-PG1_GMTP
ENSMUSG00000086918.1	4930429F24Rik	2.79088	-7.09122	2.55644	0.0246447	0.319533	-3.80199	PG1_0-PG1_GMTP
ENSMUSG00000040528.15	Milr1	-0.123026	6.57447	-2.55642	0.0246456	0.319533	-3.99902	PG1_0-PG1_GMTP
ENSMUSG00000089783.2	Gm454	-2.4725	-5.98767	-2.55513	0.024705	0.320118	-3.6944	PG1_0-PG1_GMTP
ENSMUSG00000068184.7	Ndufaf2	0.231455	2.60738	2.5544	0.0247384	0.320337	-3.59951	PG1_0-PG1_GMTP
ENSMUSG00000064871.1	Snord58b	-1.20104	-3.4642	-2.55299	0.0248035	0.320337	-3.39166	PG1_0-PG1_GMTP
ENSMUSG00000016256.10	Ctsz	-0.180073	11.0988	-2.55291	0.0248074	0.320337	-4.0539	PG1_0-PG1_GMTP
ENSMUSG00000096856.7	Gm10778	0.715299	-1.74973	2.55281	0.0248119	0.320337	-3.23204	PG1_0-PG1_GMTP
ENSMUSG00000036606.17	Plxnb2	-0.172975	9.81466	-2.55243	0.0248292	0.320337	-4.05618	PG1_0-PG1_GMTP
ENSMUSG00000086158.2	Ccpg1os	0.435683	0.606486	2.55237	0.0248323	0.320337	-3.32596	PG1_0-PG1_GMTP
ENSMUSG00000101225.1	1700008J07Rik	0.884531	-0.739584	2.55232	0.0248344	0.320337	-3.23071	PG1_0-PG1_GMTP
ENSMUSG00000024402.5	Lta	3.27623	-5.54295	2.55218	0.0248412	0.320337	-3.64837	PG1_0-PG1_GMTP
ENSMUSG00000095463.8	Entpd4	1.6592	-4.75556	2.55196	0.0248511	0.320337	-3.55895	PG1_0-PG1_GMTP
ENSMUSG00000059796.16	Eif4a1	0.118315	9.42248	2.55066	0.0249113	0.32055	-4.05791	PG1_0-PG1_GMTP
ENSMUSG00000022358.7	Fbxo32	0.212956	4.3578	2.55055	0.0249164	0.32055	-3.87119	PG1_0-PG1_GMTP
ENSMUSG00000054409.5	Tmem74	-0.612549	-1.68161	-2.55043	0.0249221	0.32055	-3.23296	PG1_0-PG1_GMTP
ENSMUSG00000032965.11	Ift57	-0.251917	3.85996	-2.55036	0.0249252	0.32055	-3.80869	PG1_0-PG1_GMTP
ENSMUSG00000022822.16	Abcc5	-0.181388	7.02815	-2.54954	0.0249634	0.320857	-4.02464	PG1_0-PG1_GMTP
ENSMUSG00000090317.1	Gm17324	2.79074	-6.45405	2.54836	0.0250183	0.321359	-3.74682	PG1_0-PG1_GMTP
ENSMUSG00000096740.8	Lbhd1	0.439083	0.91049	2.54808	0.0250312	0.321359	-3.36642	PG1_0-PG1_GMTP
ENSMUSG00000016552.13	Foxred2	-0.172686	5.02784	-2.54714	0.0250752	0.321738	-3.93908	PG1_0-PG1_GMTP
ENSMUSG00000111091.1	Gm48651	-2.4601	-6.87457	-2.5457	0.0251424	0.322415	-3.78879	PG1_0-PG1_GMTP
ENSMUSG00000093080.1	Mir3060	1.88197	-3.7151	2.54483	0.0251827	0.322747	-3.43691	PG1_0-PG1_GMTP
ENSMUSG00000024066.9	Xdh	-0.152314	8.94881	-2.54293	0.025272	0.323203	-4.06854	PG1_0-PG1_GMTP
ENSMUSG00000045064.5	Zc2hc1c	0.691631	-0.480098	2.54259	0.0252879	0.323203	-3.25576	PG1_0-PG1_GMTP
ENSMUSG00000096423.1	Gm24978	3.05455	-6.76281	2.5421	0.0253111	0.323203	-3.78062	PG1_0-PG1_GMTP
ENSMUSG00000033863.2	Klf9	0.224747	4.49429	2.54206	0.0253128	0.323203	-3.90089	PG1_0-PG1_GMTP
ENSMUSG00000054622.4	D730045B01Rik	3.36114	-6.10716	2.54178	0.0253263	0.323203	-3.71611	PG1_0-PG1_GMTP
ENSMUSG00000064337.1	mt-Rnr1	-0.155811	8.24793	-2.54174	0.0253278	0.323203	-4.06294	PG1_0-PG1_GMTP
ENSMUSG00000034486.8	Gbx2	3.21726	-6.20452	2.54134	0.0253471	0.323203	-3.72639	PG1_0-PG1_GMTP
ENSMUSG00000058900.5	Rsl1	-0.24463	3.42362	-2.54123	0.0253522	0.323203	-3.75868	PG1_0-PG1_GMTP
ENSMUSG00000073700.3	Klhl21	0.202421	4.8112	2.54062	0.0253809	0.323203	-3.93338	PG1_0-PG1_GMTP
ENSMUSG00000085971.4	Gm15411	2.39205	-7.30297	2.54057	0.0253832	0.323203	-3.82978	PG1_0-PG1_GMTP
ENSMUSG00000113553.1	Gm40932	-0.763937	-2.01243	-2.54045	0.0253887	0.323203	-3.25978	PG1_0-PG1_GMTP
ENSMUSG00000089105.1	Gm23115	2.36913	-7.03881	2.54038	0.0253921	0.323203	-3.80694	PG1_0-PG1_GMTP
ENSMUSG00000038256.15	Bcl9	-0.173922	4.8099	-2.53984	0.0254177	0.323344	-3.93465	PG1_0-PG1_GMTP
ENSMUSG00000033952.14	Aspm	-0.46258	2.71564	-2.53946	0.0254357	0.323348	-3.64346	PG1_0-PG1_GMTP
ENSMUSG00000101505.1	1700109G14Rik	-1.96204	-5.37941	-2.53922	0.025447	0.323348	-3.64004	PG1_0-PG1_GMTP
ENSMUSG00000007682.6	Dio2	0.268927	7.0129	2.53873	0.0254704	0.323461	-4.04341	PG1_0-PG1_GMTP
ENSMUSG00000098995.1	Gm27598	-1.55998	-4.58234	-2.53791	0.0255092	0.32377	-3.55063	PG1_0-PG1_GMTP
ENSMUSG00000103574.1	Gm37116	0.748146	-1.94162	2.5375	0.0255287	0.323833	-3.26018	PG1_0-PG1_GMTP
ENSMUSG00000018830.10	Myh11	2.24731	-6.08575	2.53566	0.0256161	0.324757	-3.7181	PG1_0-PG1_GMTP
ENSMUSG00000028893.8	Sesn2	-0.156058	4.77465	-2.53467	0.0256631	0.325137	-3.94072	PG1_0-PG1_GMTP
ENSMUSG00000093553.1	Gm20633	0.507641	-0.793577	2.53412	0.0256895	0.325137	-3.25586	PG1_0-PG1_GMTP
ENSMUSG00000083534.1	H2-M6-ps	3.21728	-6.11602	2.53411	0.0256898	0.325137	-3.72227	PG1_0-PG1_GMTP
ENSMUSG00000026471.14	Mr1	-0.170114	4.6816	-2.53344	0.0257219	0.325201	-3.93447	PG1_0-PG1_GMTP
ENSMUSG00000060441.15	Trim5	-0.205323	4.02861	-2.5334	0.025724	0.325201	-3.86125	PG1_0-PG1_GMTP
ENSMUSG00000055322.16	Tns1	0.195227	5.63405	2.53288	0.0257486	0.325327	-4.00193	PG1_0-PG1_GMTP
ENSMUSG00000083264.1	Gm11461	3.89868	-5.52357	2.53209	0.0257864	0.325577	-3.66119	PG1_0-PG1_GMTP
ENSMUSG00000000088.7	Cox5a	-0.188379	5.81371	-2.53186	0.0257975	0.325577	-4.01268	PG1_0-PG1_GMTP
ENSMUSG00000118238.1	Gm34432	-2.22845	-5.11786	-2.52991	0.0258912	0.326574	-3.61823	PG1_0-PG1_GMTP
ENSMUSG00000105889.1	Gm42776	-1.06699	-2.51475	-2.52928	0.0259217	0.326772	-3.30761	PG1_0-PG1_GMTP
ENSMUSG00000040533.7	Matn1	-1.63832	-2.78551	-2.52883	0.0259431	0.326772	-3.33318	PG1_0-PG1_GMTP
ENSMUSG00000036832.5	Lpar3	-2.07967	-4.66536	-2.52867	0.0259508	0.326772	-3.56808	PG1_0-PG1_GMTP
ENSMUSG00000040506.16	Ambra1	-0.135327	5.88504	-2.52773	0.0259965	0.32707	-4.02327	PG1_0-PG1_GMTP
ENSMUSG00000098019.1	Gm2546	-2.36534	-4.71248	-2.52758	0.0260038	0.32707	-3.57438	PG1_0-PG1_GMTP
ENSMUSG00000034320.14	Slc26a2	-0.190746	6.52095	-2.52711	0.0260264	0.32717	-4.0492	PG1_0-PG1_GMTP
ENSMUSG00000021876.15	Rnase4	0.200593	4.48259	2.52524	0.026117	0.328	-3.92926	PG1_0-PG1_GMTP
ENSMUSG00000075707.5	Dio3	3.05445	-6.5181	2.52514	0.0261218	0.328	-3.76814	PG1_0-PG1_GMTP
ENSMUSG00000053414.8	Hunk	2.79545	-6.92128	2.52469	0.0261435	0.328087	-3.80591	PG1_0-PG1_GMTP
ENSMUSG00000032175.11	Tyk2	-0.131833	6.99589	-2.52373	0.0261903	0.32849	-4.06951	PG1_0-PG1_GMTP
ENSMUSG00000037447.16	Arid5a	-0.190969	3.54336	-2.52171	0.0262886	0.32947	-3.81172	PG1_0-PG1_GMTP
ENSMUSG00000048852.13	Gm12185	-0.340496	1.75048	-2.52152	0.026298	0.32947	-3.52081	PG1_0-PG1_GMTP
ENSMUSG00000044066.14	Cep68	0.203196	3.67874	2.52066	0.0263399	0.32981	-3.83443	PG1_0-PG1_GMTP
ENSMUSG00000018547.8	Pip4k2b	-0.157416	6.40343	-2.51957	0.0263936	0.330297	-4.05848	PG1_0-PG1_GMTP
ENSMUSG00000036768.6	Kif15	-0.2758	2.44689	-2.51899	0.0264219	0.330466	-3.63358	PG1_0-PG1_GMTP
ENSMUSG00000103123.1	Gm37390	2.36911	-7.0999	2.51684	0.0265276	0.331285	-3.82638	PG1_0-PG1_GMTP
ENSMUSG00000022385.11	Gtse1	-0.2927	2.77924	-2.51682	0.0265287	0.331285	-3.69328	PG1_0-PG1_GMTP
ENSMUSG00000029089.8	5730480H06Rik	0.279679	2.38139	2.5166	0.0265394	0.331285	-3.62693	PG1_0-PG1_GMTP
ENSMUSG00000046447.3	Camk2n1	2.32137	-4.29276	2.51621	0.0265585	0.331285	-3.53597	PG1_0-PG1_GMTP
ENSMUSG00000085156.8	Snhg15	-0.327849	1.76218	-2.51568	0.0265848	0.331285	-3.53233	PG1_0-PG1_GMTP
ENSMUSG00000112381.1	Gm8170	-2.04106	-4.87227	-2.5156	0.0265887	0.331285	-3.60238	PG1_0-PG1_GMTP
ENSMUSG00000104301.3	Wdr49	2.44427	-5.86554	2.51555	0.0265913	0.331285	-3.70943	PG1_0-PG1_GMTP
ENSMUSG00000024112.16	Cacna1h	-2.9532	-6.96839	-2.51493	0.0266219	0.331482	-3.81607	PG1_0-PG1_GMTP
ENSMUSG00000040907.15	Atp1a3	0.149032	8.68726	2.51418	0.0266591	0.331759	-4.11708	PG1_0-PG1_GMTP
ENSMUSG00000073155.12	1810058I24Rik	0.16123	6.02907	2.51376	0.0266797	0.331831	-4.05427	PG1_0-PG1_GMTP
ENSMUSG00000017716.15	Birc5	-0.310695	2.80757	-2.51341	0.0266969	0.33186	-3.7039	PG1_0-PG1_GMTP
ENSMUSG00000097428.1	AW047730	-2.9444	-6.50772	-2.51161	0.0267863	0.332647	-3.77589	PG1_0-PG1_GMTP
ENSMUSG00000048538.7	Gm9826	1.58146	-3.83362	2.51136	0.0267987	0.332647	-3.4855	PG1_0-PG1_GMTP
ENSMUSG00000068876.16	Cgn	2.2565	-6.39299	2.51124	0.026805	0.332647	-3.76515	PG1_0-PG1_GMTP
ENSMUSG00000037826.5	Ppm1k	-0.1452	3.68064	-2.51092	0.0268206	0.332656	-3.85169	PG1_0-PG1_GMTP
ENSMUSG00000025888.6	Casp1	-0.137355	7.62705	-2.51019	0.0268573	0.332844	-4.10829	PG1_0-PG1_GMTP
ENSMUSG00000117969.1	Gm5826	2.07835	-7.33388	2.51002	0.0268656	0.332844	-3.85006	PG1_0-PG1_GMTP
ENSMUSG00000078945.10	Naip2	-0.164946	6.98567	-2.50857	0.0269381	0.333424	-4.09602	PG1_0-PG1_GMTP
ENSMUSG00000055341.10	Zfp457	-1.30655	-3.89586	-2.50836	0.0269483	0.333424	-3.49628	PG1_0-PG1_GMTP
ENSMUSG00000111271.1	Gm48127	-1.77164	-7.11387	-2.50819	0.0269572	0.333424	-3.83274	PG1_0-PG1_GMTP
ENSMUSG00000072573.2	Gm10369	0.867954	-2.82683	2.50636	0.0270488	0.334371	-3.36336	PG1_0-PG1_GMTP
ENSMUSG00000020101.14	Vsir	0.125616	9.5309	2.50514	0.02711	0.334839	-4.13907	PG1_0-PG1_GMTP
ENSMUSG00000099647.1	Gm5776	1.24298	-2.91654	2.50501	0.0271166	0.334839	-3.37414	PG1_0-PG1_GMTP
ENSMUSG00000099320.1	Mir7664	1.8304	-7.00567	2.50423	0.0271559	0.334968	-3.82583	PG1_0-PG1_GMTP
ENSMUSG00000113789.1	Gm47322	2.99795	-4.98793	2.5042	0.0271571	0.334968	-3.62443	PG1_0-PG1_GMTP
ENSMUSG00000073415.4	Gm10501	-2.43352	-4.02537	-2.50339	0.0271983	0.335141	-3.51652	PG1_0-PG1_GMTP
ENSMUSG00000001604.14	Tcea3	-0.485438	0.584605	-2.50299	0.0272185	0.335141	-3.40306	PG1_0-PG1_GMTP
ENSMUSG00000032826.19	Ank2	0.399322	0.988444	2.50288	0.0272239	0.335141	-3.44955	PG1_0-PG1_GMTP
ENSMUSG00000103686.1	Gm37073	-2.34246	-7.0575	-2.50241	0.0272476	0.335141	-3.83138	PG1_0-PG1_GMTP
ENSMUSG00000109647.1	Gm45510	-2.27468	-6.74518	-2.50231	0.0272528	0.335141	-3.80387	PG1_0-PG1_GMTP
ENSMUSG00000035673.10	Sbno2	-0.15087	6.9428	-2.502	0.0272684	0.335141	-4.10644	PG1_0-PG1_GMTP
ENSMUSG00000028059.16	Arhgef2	-0.108819	7.87013	-2.5018	0.0272787	0.335141	-4.12768	PG1_0-PG1_GMTP
ENSMUSG00000031365.13	Zfp275	-0.17253	5.1766	-2.50155	0.0272913	0.335141	-4.03	PG1_0-PG1_GMTP
ENSMUSG00000034110.8	Kctd7	0.178891	3.20168	2.5008	0.0273294	0.335272	-3.79229	PG1_0-PG1_GMTP
ENSMUSG00000118330.1	Gm30042	-0.84364	-0.464779	-2.50074	0.027332	0.335272	-3.31958	PG1_0-PG1_GMTP
ENSMUSG00000064039.4	Ccr1l1	-0.866822	-1.62702	-2.49981	0.0273793	0.335668	-3.29993	PG1_0-PG1_GMTP
ENSMUSG00000024621.16	Csf1r	-0.125487	11.4923	-2.49887	0.0274275	0.336074	-4.14762	PG1_0-PG1_GMTP
ENSMUSG00000030041.9	M1ap	-0.245897	3.14618	-2.498	0.0274715	0.336428	-3.78775	PG1_0-PG1_GMTP
ENSMUSG00000102463.1	1700003N22Rik	-2.14972	-4.48161	-2.49728	0.0275081	0.336543	-3.57418	PG1_0-PG1_GMTP
ENSMUSG00000112798.1	Gm40685	2.0029	-6.44258	2.4971	0.0275177	0.336543	-3.77915	PG1_0-PG1_GMTP
ENSMUSG00000117007.1	Gm41556	-0.911358	-1.24571	-2.49693	0.0275262	0.336543	-3.30121	PG1_0-PG1_GMTP
ENSMUSG00000035413.8	Tmem98	1.54876	-3.98506	2.49577	0.0275856	0.337085	-3.51893	PG1_0-PG1_GMTP
ENSMUSG00000098208.1	Gm8349	-2.27469	-6.82176	-2.49402	0.0276753	0.337921	-3.81592	PG1_0-PG1_GMTP
ENSMUSG00000022892.11	App	-0.141348	9.32177	-2.49341	0.0277062	0.337921	-4.15876	PG1_0-PG1_GMTP
ENSMUSG00000041992.9	Rapgef5	-0.230434	5.00093	-2.49303	0.0277262	0.337921	-4.03238	PG1_0-PG1_GMTP
ENSMUSG00000023987.14	Pgc	-3.14339	-6.85267	-2.493	0.0277273	0.337921	-3.81927	PG1_0-PG1_GMTP
ENSMUSG00000113035.1	5830428M24Rik	2.43016	-5.52017	2.49296	0.0277297	0.337921	-3.69002	PG1_0-PG1_GMTP
ENSMUSG00000024900.5	Cpt1a	0.122662	7.49578	2.49048	0.0278575	0.339168	-4.14033	PG1_0-PG1_GMTP
ENSMUSG00000053914.9	Kdm4d	-2.3442	-6.11947	-2.49038	0.0278624	0.339168	-3.75253	PG1_0-PG1_GMTP
ENSMUSG00000037318.10	Traf3ip3	-0.180995	4.57773	-2.48916	0.0279254	0.339652	-4.00221	PG1_0-PG1_GMTP
ENSMUSG00000042707.6	Dnali1	2.94573	-4.76957	2.48903	0.0279326	0.339652	-3.61303	PG1_0-PG1_GMTP
ENSMUSG00000099284.1	Mir7026	2.48625	-6.12149	2.48867	0.0279513	0.339693	-3.7539	PG1_0-PG1_GMTP
ENSMUSG00000042272.17	Sestd1	-0.149135	6.4497	-2.48674	0.0280511	0.340584	-4.11799	PG1_0-PG1_GMTP
ENSMUSG00000025915.14	Sgk3	-0.184484	6.41818	-2.48667	0.0280551	0.340584	-4.11701	PG1_0-PG1_GMTP
ENSMUSG00000014543.14	Klra17	-0.652243	-0.0181211	-2.48572	0.0281044	0.340904	-3.37309	PG1_0-PG1_GMTP
ENSMUSG00000040254.11	Sema3d	3.67867	-6.47242	2.48557	0.028112	0.340904	-3.78947	PG1_0-PG1_GMTP
ENSMUSG00000079553.11	Kifc1	-0.317652	3.28452	-2.48445	0.0281707	0.34143	-3.83437	PG1_0-PG1_GMTP
ENSMUSG00000026622.15	Nek2	-0.336364	2.54995	-2.48224	0.0282864	0.342618	-3.71357	PG1_0-PG1_GMTP
ENSMUSG00000026764.15	Kif5c	-0.220083	3.7233	-2.48199	0.0282995	0.342618	-3.90834	PG1_0-PG1_GMTP
ENSMUSG00000021379.2	Id4	3.07844	-5.29263	2.48116	0.0283427	0.342955	-3.67521	PG1_0-PG1_GMTP
ENSMUSG00000037032.16	Apbb1	0.694458	-2.14571	2.48083	0.0283602	0.342955	-3.3431	PG1_0-PG1_GMTP
ENSMUSG00000044043.4	Pcdhb14	3.48401	-6.53593	2.48058	0.0283734	0.342955	-3.79859	PG1_0-PG1_GMTP
ENSMUSG00000026974.11	Zmynd19	0.248853	3.44468	2.48023	0.0283919	0.342993	-3.8681	PG1_0-PG1_GMTP
ENSMUSG00000026650.15	Meig1	-1.35405	-3.27013	-2.47954	0.0284279	0.343034	-3.44265	PG1_0-PG1_GMTP
ENSMUSG00000025429.9	Pstpip2	-0.164471	4.75108	-2.47944	0.0284332	0.343034	-4.03568	PG1_0-PG1_GMTP
ENSMUSG00000103087.1	Gm38122	2.36912	-7.07975	2.47929	0.0284414	0.343034	-3.84714	PG1_0-PG1_GMTP
ENSMUSG00000024354.13	Slc23a1	1.57148	-3.04801	2.47863	0.0284758	0.34314	-3.4179	PG1_0-PG1_GMTP
ENSMUSG00000088976.1	Gm23759	-2.31685	-6.50254	-2.47854	0.0284809	0.34314	-3.79684	PG1_0-PG1_GMTP
ENSMUSG00000028247.2	Coq3	0.243516	3.09354	2.47739	0.0285418	0.343552	-3.81441	PG1_0-PG1_GMTP
ENSMUSG00000103101.1	Gm37048	-2.97451	-7.10269	-2.47731	0.0285459	0.343552	-3.85023	PG1_0-PG1_GMTP
ENSMUSG00000029084.5	Cd38	0.344502	1.21308	2.4764	0.0285941	0.343922	-3.5213	PG1_0-PG1_GMTP
ENSMUSG00000022033.9	Pbk	-0.291531	1.68504	-2.47614	0.0286075	0.343922	-3.58723	PG1_0-PG1_GMTP
ENSMUSG00000081651.1	Gm15530	2.79557	-6.72754	2.4749	0.0286734	0.344528	-3.81949	PG1_0-PG1_GMTP
ENSMUSG00000044080.9	S100a1	0.138792	6.8443	2.47298	0.0287753	0.345491	-4.15471	PG1_0-PG1_GMTP
ENSMUSG00000056257.3	Gm5447	1.61805	-3.60864	2.47257	0.0287975	0.345491	-3.49368	PG1_0-PG1_GMTP
ENSMUSG00000021880.7	Rnase6	-0.270206	3.14402	-2.4725	0.0288014	0.345491	-3.83139	PG1_0-PG1_GMTP
ENSMUSG00000098292.1	Gm27194	2.11629	-4.11144	2.47223	0.0288154	0.345491	-3.55529	PG1_0-PG1_GMTP
ENSMUSG00000098656.1	Mir7028	2.94144	-6.2551	2.47124	0.0288684	0.34594	-3.77855	PG1_0-PG1_GMTP
ENSMUSG00000034154.15	Ino80	-0.152769	5.15863	-2.47094	0.0288844	0.345946	-4.08244	PG1_0-PG1_GMTP
ENSMUSG00000027832.5	Ptx3	0.923217	-2.3663	2.46936	0.0289691	0.346774	-3.36999	PG1_0-PG1_GMTP
ENSMUSG00000029501.14	Ankle2	-0.147309	6.40569	-2.46837	0.0290225	0.347165	-4.14872	PG1_0-PG1_GMTP
ENSMUSG00000036896.5	C1qc	-0.147638	10.3053	-2.46739	0.0290752	0.347165	-4.20704	PG1_0-PG1_GMTP
ENSMUSG00000106965.1	Gm18290	2.36917	-6.75915	2.46712	0.0290896	0.347165	-3.82716	PG1_0-PG1_GMTP
ENSMUSG00000070730.11	Rmdn3	-0.143774	4.57531	-2.46674	0.0291098	0.347165	-4.04117	PG1_0-PG1_GMTP
ENSMUSG00000040006.13	Ginm1	0.172289	4.50635	2.46664	0.0291155	0.347165	-4.03441	PG1_0-PG1_GMTP
ENSMUSG00000041498.13	Kif14	-0.484786	1.39456	-2.46661	0.0291173	0.347165	-3.56177	PG1_0-PG1_GMTP
ENSMUSG00000072621.13	Slfn10-ps	-0.346613	5.44546	-2.46649	0.0291236	0.347165	-4.10838	PG1_0-PG1_GMTP
ENSMUSG00000027381.16	Bcl2l11	-0.142981	7.37134	-2.46644	0.0291262	0.347165	-4.17985	PG1_0-PG1_GMTP
ENSMUSG00000038304.14	Cd160	-1.21633	-2.83359	-2.46447	0.0292326	0.348247	-3.41225	PG1_0-PG1_GMTP
ENSMUSG00000032558.19	Nphp3	0.320246	1.54858	2.46394	0.0292611	0.348401	-3.58778	PG1_0-PG1_GMTP
ENSMUSG00000095132.1	Rnu6	-2.27478	-7.30297	-2.46335	0.0292933	0.348598	-3.87469	PG1_0-PG1_GMTP
ENSMUSG00000030268.17	Bcat1	1.05991	-2.21263	2.46284	0.0293211	0.348606	-3.36928	PG1_0-PG1_GMTP
ENSMUSG00000083087.1	Gm11249	1.65813	-3.50868	2.46268	0.0293294	0.348606	-3.49056	PG1_0-PG1_GMTP
ENSMUSG00000024401.14	Tnf	-0.369178	3.55851	-2.46246	0.0293414	0.348606	-3.91699	PG1_0-PG1_GMTP
ENSMUSG00000031751.14	Amfr	0.12045	7.67978	2.46219	0.0293565	0.348606	-4.19388	PG1_0-PG1_GMTP
ENSMUSG00000082154.1	Gm16464	-0.50568	0.857235	-2.46171	0.0293825	0.348607	-3.50054	PG1_0-PG1_GMTP
ENSMUSG00000005413.8	Hmox1	0.128212	7.93779	2.46139	0.0293998	0.348607	-4.20001	PG1_0-PG1_GMTP
ENSMUSG00000054702.14	Ap1s3	0.257828	2.90416	2.46132	0.0294034	0.348607	-3.80975	PG1_0-PG1_GMTP
ENSMUSG00000078249.5	Hmga1b	-0.384915	1.01271	-2.46101	0.0294202	0.348621	-3.52077	PG1_0-PG1_GMTP
ENSMUSG00000108878.1	Gm49493	-2.87724	-3.66704	-2.45943	0.0295068	0.349461	-3.51453	PG1_0-PG1_GMTP
ENSMUSG00000008226.14	Scrn3	0.161166	4.11928	2.45733	0.0296213	0.350631	-4.0058	PG1_0-PG1_GMTP
ENSMUSG00000032128.15	Robo3	-2.70548	-6.83112	-2.45639	0.0296729	0.350906	-3.84007	PG1_0-PG1_GMTP
ENSMUSG00000036853.5	Mcoln3	0.149707	6.29856	2.45604	0.0296923	0.350906	-4.16645	PG1_0-PG1_GMTP
ENSMUSG00000060128.5	Gm2710	1.63232	-6.09442	2.4558	0.0297056	0.350906	-3.77383	PG1_0-PG1_GMTP
ENSMUSG00000032328.12	Tmem30a	0.124698	7.32714	2.45576	0.0297074	0.350906	-4.19756	PG1_0-PG1_GMTP
ENSMUSG00000054320.16	Lrrc36	-2.27039	-4.01066	-2.45394	0.0298078	0.351506	-3.56104	PG1_0-PG1_GMTP
ENSMUSG00000041362.17	Shtn1	-0.118313	7.6805	-2.45381	0.0298148	0.351506	-4.20859	PG1_0-PG1_GMTP
ENSMUSG00000051413.17	Plagl2	-0.141549	6.13581	-2.45364	0.0298245	0.351506	-4.16432	PG1_0-PG1_GMTP
ENSMUSG00000043822.18	Adamtsl5	0.227125	4.24575	2.45337	0.0298392	0.351506	-4.02834	PG1_0-PG1_GMTP
ENSMUSG00000029993.16	Nfu1	-0.144528	5.18931	-2.45331	0.0298425	0.351506	-4.11537	PG1_0-PG1_GMTP
ENSMUSG00000028469.15	Npr2	1.31991	-2.94416	2.45303	0.029858	0.351506	-3.43585	PG1_0-PG1_GMTP
ENSMUSG00000115111.1	Gm4632	2.89052	-6.72215	2.45284	0.0298685	0.351506	-3.8329	PG1_0-PG1_GMTP
ENSMUSG00000108221.1	Gm44203	-2.34287	-6.84354	-2.45209	0.0299099	0.351808	-3.84379	PG1_0-PG1_GMTP
ENSMUSG00000029817.11	Tra2a	0.136589	5.36458	2.45101	0.0299699	0.352328	-4.13069	PG1_0-PG1_GMTP
ENSMUSG00000022102.13	Dok2	0.145798	6.01123	2.45035	0.0300062	0.352367	-4.16491	PG1_0-PG1_GMTP
ENSMUSG00000087261.2	Gm15477	-3.12264	-6.48102	-2.45023	0.0300132	0.352367	-3.81327	PG1_0-PG1_GMTP
ENSMUSG00000056724.15	Nbeal2	-0.188918	6.26929	-2.44958	0.0300494	0.352367	-4.17669	PG1_0-PG1_GMTP
ENSMUSG00000022106.14	Rcbtb2	0.144392	7.03943	2.4495	0.0300538	0.352367	-4.20135	PG1_0-PG1_GMTP
ENSMUSG00000105875.1	Gm43518	2.42027	-6.80942	2.44932	0.0300637	0.352367	-3.84262	PG1_0-PG1_GMTP
ENSMUSG00000106291.1	1110003F10Rik	2.50965	-4.31198	2.44924	0.030068	0.352367	-3.59799	PG1_0-PG1_GMTP
ENSMUSG00000037593.12	Rskr	1.22043	-2.95299	2.44816	0.0301282	0.352887	-3.44221	PG1_0-PG1_GMTP
ENSMUSG00000040734.14	Ppp1r13l	0.264118	2.74437	2.44745	0.030168	0.353168	-3.80613	PG1_0-PG1_GMTP
ENSMUSG00000027939.11	Nup210l	-1.1568	-2.31912	-2.44626	0.0302345	0.353612	-3.39575	PG1_0-PG1_GMTP
ENSMUSG00000021364.16	Elovl2	-3.02083	-4.53685	-2.4462	0.0302376	0.353612	-3.62445	PG1_0-PG1_GMTP
ENSMUSG00000114547.1	Gm3226	0.693028	-2.10487	2.44504	0.0303028	0.354048	-3.38675	PG1_0-PG1_GMTP
ENSMUSG00000025815.13	Dhtkd1	0.547266	-0.385805	2.44497	0.0303066	0.354048	-3.40826	PG1_0-PG1_GMTP
ENSMUSG00000109355.1	Gm4880	-2.31709	-6.44343	-2.44409	0.0303556	0.354381	-3.8139	PG1_0-PG1_GMTP
ENSMUSG00000034709.8	Ppp1r21	-0.116728	6.04855	-2.44372	0.0303763	0.354381	-4.17812	PG1_0-PG1_GMTP
ENSMUSG00000085606.1	Gm15792	-2.31734	-6.72257	-2.44361	0.0303828	0.354381	-3.83875	PG1_0-PG1_GMTP
ENSMUSG00000096606.2	Tpbgl	0.584791	-0.280113	2.4431	0.0304112	0.354527	-3.41832	PG1_0-PG1_GMTP
ENSMUSG00000043629.12	1700019D03Rik	-3.5659	-5.84093	-2.44259	0.03044	0.354677	-3.75887	PG1_0-PG1_GMTP
ENSMUSG00000020882.17	Cacnb1	-0.365624	1.9788	-2.4419	0.0304788	0.354945	-3.68878	PG1_0-PG1_GMTP
ENSMUSG00000021298.8	Gpr132	-0.179097	4.24423	-2.44061	0.0305515	0.355402	-4.05032	PG1_0-PG1_GMTP
ENSMUSG00000049536.5	Tceal1	0.481685	0.606178	2.4404	0.0305635	0.355402	-3.50553	PG1_0-PG1_GMTP
ENSMUSG00000022526.8	Zfp251	0.19775	3.97027	2.44024	0.0305727	0.355402	-4.01576	PG1_0-PG1_GMTP
ENSMUSG00000071203.6	Naip5	-0.180962	5.57052	-2.43972	0.0306019	0.355402	-4.16218	PG1_0-PG1_GMTP
ENSMUSG00000063193.9	Cd300lb	0.113921	8.3542	2.43972	0.0306021	0.355402	-4.24425	PG1_0-PG1_GMTP
ENSMUSG00000102672.1	Gm37105	2.69543	-7.13216	2.43951	0.0306137	0.355402	-3.87519	PG1_0-PG1_GMTP
ENSMUSG00000021285.15	Ppp1r13b	-0.158552	4.61996	-2.43851	0.0306706	0.355878	-4.09471	PG1_0-PG1_GMTP
ENSMUSG00000019987.9	Arg1	1.30013	-4.97776	2.43742	0.0307325	0.356411	-3.67731	PG1_0-PG1_GMTP
ENSMUSG00000030681.18	Mvp	-0.176011	7.61952	-2.43713	0.0307491	0.356417	-4.23662	PG1_0-PG1_GMTP
ENSMUSG00000065999.13	Zfp985	2.6832	-5.69041	2.43602	0.0308118	0.356922	-3.74911	PG1_0-PG1_GMTP
ENSMUSG00000028583.14	Pdpn	0.299838	3.79632	2.4358	0.0308245	0.356922	-3.99906	PG1_0-PG1_GMTP
ENSMUSG00000070720.4	Tmem200b	-3.79858	-5.45209	-2.43513	0.0308629	0.357095	-3.72652	PG1_0-PG1_GMTP
ENSMUSG00000105047.1	Gm42533	-2.11939	-6.21254	-2.43497	0.0308715	0.357095	-3.79904	PG1_0-PG1_GMTP
ENSMUSG00000030714.14	Sgf29	-0.300349	2.45924	-2.43433	0.0309085	0.357243	-3.77966	PG1_0-PG1_GMTP
ENSMUSG00000053111.13	Fank1	3.16584	-7.03478	2.43419	0.0309163	0.357243	-3.87059	PG1_0-PG1_GMTP
ENSMUSG00000078489.2	Gm17106	-1.53774	-6.87668	-2.43341	0.0309608	0.357571	-3.85811	PG1_0-PG1_GMTP
ENSMUSG00000097613.1	Gm17597	2.79556	-6.75459	2.43276	0.0309978	0.357651	-3.8483	PG1_0-PG1_GMTP
ENSMUSG00000074419.11	Gm15448	-0.281749	2.8189	-2.43273	0.0309997	0.357651	-3.84402	PG1_0-PG1_GMTP
ENSMUSG00000003814.8	Calr	-0.107596	10.1945	-2.4316	0.0310644	0.358212	-4.26983	PG1_0-PG1_GMTP
ENSMUSG00000031673.6	Cdh11	0.297441	1.03529	2.43065	0.0311194	0.358239	-3.57297	PG1_0-PG1_GMTP
ENSMUSG00000035266.16	Helq	-0.208489	2.4288	-2.43054	0.0311256	0.358239	-3.78095	PG1_0-PG1_GMTP
ENSMUSG00000059674.7	Cdh24	1.17964	-2.66098	2.43033	0.0311373	0.358239	-3.43747	PG1_0-PG1_GMTP
ENSMUSG00000015733.13	Capza2	-0.130728	9.03474	-2.43009	0.0311515	0.358239	-4.26813	PG1_0-PG1_GMTP
ENSMUSG00000045776.3	Lrtm1	2.79539	-7.03264	2.42992	0.0311609	0.358239	-3.87299	PG1_0-PG1_GMTP
ENSMUSG00000006471.18	Ndor1	-0.290748	2.29761	-2.42989	0.0311631	0.358239	-3.76024	PG1_0-PG1_GMTP
ENSMUSG00000056771.7	Gm10010	1.57617	-4.91963	2.42951	0.0311849	0.358275	-3.67784	PG1_0-PG1_GMTP
ENSMUSG00000039835.16	Nhsl1	0.905636	-2.45931	2.42927	0.0311983	0.358275	-3.42485	PG1_0-PG1_GMTP
ENSMUSG00000037579.7	Kcnh3	2.79566	-6.58304	2.42898	0.0312152	0.358285	-3.83602	PG1_0-PG1_GMTP
ENSMUSG00000096687.8	Mfsd4b4	-0.191322	3.87346	-2.42844	0.0312463	0.358435	-4.02292	PG1_0-PG1_GMTP
ENSMUSG00000052125.16	F730043M19Rik	-0.425961	0.827493	-2.4282	0.0312604	0.358435	-3.55098	PG1_0-PG1_GMTP
ENSMUSG00000021194.6	Chga	-2.51349	-6.8049	-2.42777	0.0312853	0.358457	-3.85566	PG1_0-PG1_GMTP
ENSMUSG00000102224.5	4930447F24Rik	-0.819037	-1.90228	-2.42761	0.0312945	0.358457	-3.40226	PG1_0-PG1_GMTP
ENSMUSG00000091199.10	Gm2619	-1.52339	-4.17483	-2.42708	0.031325	0.358535	-3.60351	PG1_0-PG1_GMTP
ENSMUSG00000026581.14	Sell	-0.969924	-1.56158	-2.42609	0.0313821	0.358535	-3.39892	PG1_0-PG1_GMTP
ENSMUSG00000034343.14	Ube2f	-0.153626	5.63041	-2.42601	0.0313871	0.358535	-4.18931	PG1_0-PG1_GMTP
ENSMUSG00000057554.13	Lgals8	-0.129794	7.29008	-2.42589	0.0313936	0.358535	-4.24896	PG1_0-PG1_GMTP
ENSMUSG00000020770.13	Unk	-0.133077	4.87452	-2.42584	0.031397	0.358535	-4.13972	PG1_0-PG1_GMTP
ENSMUSG00000034557.14	Zfyve9	0.308625	2.39862	2.42582	0.0313977	0.358535	-3.78387	PG1_0-PG1_GMTP
ENSMUSG00000056671.7	Prelid2	0.338281	0.73608	2.42465	0.031466	0.359048	-3.54567	PG1_0-PG1_GMTP
ENSMUSG00000029629.17	Phf14	0.129301	4.99924	2.42449	0.0314748	0.359048	-4.15198	PG1_0-PG1_GMTP
ENSMUSG00000109561.1	Ankrd31	2.79088	-7.09122	2.4222	0.0316086	0.36039	-3.8823	PG1_0-PG1_GMTP
ENSMUSG00000029217.16	Tec	0.101986	6.46328	2.42099	0.031679	0.361008	-4.23364	PG1_0-PG1_GMTP
ENSMUSG00000051169.14	Rpusd3	1.02982	-1.47756	2.42023	0.0317236	0.361331	-3.40675	PG1_0-PG1_GMTP
ENSMUSG00000027398.13	Il1b	-0.658761	0.441744	-2.41978	0.03175	0.361448	-3.52004	PG1_0-PG1_GMTP
ENSMUSG00000111212.1	Gm47087	3.16647	-6.35819	2.41827	0.0318385	0.361979	-3.82334	PG1_0-PG1_GMTP
ENSMUSG00000056413.16	Adap1	-0.173987	6.98186	-2.41819	0.0318432	0.361979	-4.25454	PG1_0-PG1_GMTP
ENSMUSG00000102540.1	Gm38134	-2.9631	-7.05278	-2.41811	0.0318478	0.361979	-3.88173	PG1_0-PG1_GMTP
ENSMUSG00000032530.14	Lyzl4	0.480673	0.949496	2.41788	0.0318616	0.361979	-3.58268	PG1_0-PG1_GMTP
ENSMUSG00000026893.4	Gca	-0.224337	2.914	-2.4163	0.0319542	0.362847	-3.88835	PG1_0-PG1_GMTP
ENSMUSG00000007458.14	M6pr	-0.104222	8.72638	-2.41578	0.0319851	0.363013	-4.2904	PG1_0-PG1_GMTP
ENSMUSG00000040552.8	C3ar1	-0.120895	10.5689	-2.4145	0.0320608	0.363688	-4.29942	PG1_0-PG1_GMTP
ENSMUSG00000095028.6	Sirpb1b	-0.17045	4.19154	-2.41363	0.0321122	0.364085	-4.09055	PG1_0-PG1_GMTP
ENSMUSG00000105866.1	Gm6745	-2.61198	-4.76381	-2.41223	0.0321954	0.364571	-3.67648	PG1_0-PG1_GMTP
ENSMUSG00000020899.16	Pfas	0.176556	3.7021	2.41214	0.0322004	0.364571	-4.026	PG1_0-PG1_GMTP
ENSMUSG00000052336.7	Cx3cr1	-0.36794	3.42978	-2.41195	0.0322117	0.364571	-3.98336	PG1_0-PG1_GMTP
ENSMUSG00000105550.1	Gm35585	-2.9938	-3.27567	-2.41181	0.0322205	0.364571	-3.51554	PG1_0-PG1_GMTP
ENSMUSG00000030159.15	Clec1b	0.376453	1.66208	2.41082	0.0322793	0.364905	-3.69229	PG1_0-PG1_GMTP
ENSMUSG00000097662.1	Gm2093	-2.65469	-4.87835	-2.41076	0.0322826	0.364905	-3.68906	PG1_0-PG1_GMTP
ENSMUSG00000117622.1	Gm20026	-2.70029	-5.38349	-2.41047	0.0323002	0.364918	-3.73854	PG1_0-PG1_GMTP
ENSMUSG00000028565.18	Nfia	0.390284	1.78544	2.40951	0.032357	0.365209	-3.71298	PG1_0-PG1_GMTP
ENSMUSG00000057789.14	Bak1	-0.154286	6.26965	-2.40949	0.0323586	0.365209	-4.24667	PG1_0-PG1_GMTP
ENSMUSG00000081723.1	Gm15931	-0.163081	4.11661	-2.40843	0.0324218	0.365387	-4.09019	PG1_0-PG1_GMTP
ENSMUSG00000021745.14	Ptprg	1.20119	-2.26159	2.40841	0.032423	0.365387	-3.43982	PG1_0-PG1_GMTP
ENSMUSG00000028278.14	Rragd	0.130899	5.85785	2.40802	0.0324464	0.365387	-4.23189	PG1_0-PG1_GMTP
ENSMUSG00000054510.5	Gm14461	0.185608	4.25872	2.4079	0.0324534	0.365387	-4.10873	PG1_0-PG1_GMTP
ENSMUSG00000051920.7	Rspo2	-0.762494	-0.989173	-2.40759	0.0324718	0.365387	-3.43302	PG1_0-PG1_GMTP
ENSMUSG00000067878.13	Map7d3	0.62086	-0.600924	2.40758	0.0324726	0.365387	-3.45079	PG1_0-PG1_GMTP
ENSMUSG00000103925.1	B230112G18Rik	-2.69248	-7.26983	-2.40586	0.0325757	0.366313	-3.90575	PG1_0-PG1_GMTP
ENSMUSG00000042962.5	Gm5436	1.54496	-3.79846	2.40566	0.0325878	0.366313	-3.58333	PG1_0-PG1_GMTP
ENSMUSG00000062373.8	Tmem65	0.122383	7.11009	2.40509	0.0326224	0.366364	-4.2808	PG1_0-PG1_GMTP
ENSMUSG00000030748.9	Il4ra	-0.153994	6.62919	-2.40504	0.0326252	0.366364	-4.26694	PG1_0-PG1_GMTP
ENSMUSG00000000085.16	Scmh1	0.169061	3.88163	2.40439	0.0326643	0.366565	-4.06554	PG1_0-PG1_GMTP
ENSMUSG00000068604.4	Gm8225	2.0112	-6.70674	2.40374	0.0327033	0.366565	-3.86256	PG1_0-PG1_GMTP
ENSMUSG00000081142.1	Gm15497	-3.53826	-6.04049	-2.40342	0.0327228	0.366565	-3.805	PG1_0-PG1_GMTP
ENSMUSG00000043017.9	Ptgir	-0.19898	4.28285	-2.40341	0.0327232	0.366565	-4.11939	PG1_0-PG1_GMTP
ENSMUSG00000024268.16	Celf4	-0.851056	-1.02512	-2.40329	0.0327307	0.366565	-3.43798	PG1_0-PG1_GMTP
ENSMUSG00000020271.17	Fbxw11	-0.1132	6.78008	-2.40311	0.0327416	0.366565	-4.275	PG1_0-PG1_GMTP
ENSMUSG00000052698.15	Tln2	0.636866	-0.847581	2.40253	0.0327767	0.366773	-3.44577	PG1_0-PG1_GMTP
ENSMUSG00000065219.1	Snord32a	-1.63043	-5.13886	-2.40105	0.0328658	0.367586	-3.7223	PG1_0-PG1_GMTP
ENSMUSG00000076431.4	Sox4	0.131796	4.40945	2.40035	0.0329081	0.367686	-4.139	PG1_0-PG1_GMTP
ENSMUSG00000024795.11	Kif20b	-0.213111	3.70081	-2.39978	0.0329427	0.367686	-4.04706	PG1_0-PG1_GMTP
ENSMUSG00000075704.16	Txnrd2	0.144163	4.38548	2.39951	0.0329595	0.367686	-4.13783	PG1_0-PG1_GMTP
ENSMUSG00000109957.1	Gm45353	2.28275	-6.70423	2.39943	0.0329644	0.367686	-3.86508	PG1_0-PG1_GMTP
[truncated: 501 more rows]
