# Supplementary material for: PGLYRP-1 mediated intracellular peptidoglycan detection promotes mucosal protection
Source: Research Square preprint supplement (doi:10.21203/rs.3.rs-5118704/v1), 2024-10-14
Supplement: Supplementary file 8 [file 5c3f7e4e638c8691a382bdf3.xlsx]

## Sheet: Sheet1
GeneID	GeneSymbol	logFC	AveExpr	t	P.Value	adj.P.Val	B	Contrast
ENSG00000153395.10	LPCAT1	-2.63148	3.83178	-15.0937	3.63220763020442e-10	8.94736123340385e-06	13.4882	Inactive-Active
ENSG00000117115.13	PADI2	3.03021	7.20805	14.3796	6.96507261062084e-10	8.94736123340385e-06	13.1342	Inactive-Active
ENSG00000137673.9	MMP7	-9.28965	-0.504001	-14.1415	8.70902426923576e-10	8.94736123340385e-06	9.6175	Inactive-Active
ENSG00000062038.15	CDH3	-6.23338	1.52008	-13.3826	1.81577711654819e-09	1.3991016627283e-05	10.8353	Inactive-Active
ENSG00000088882.8	CPXM1	-4.24179	3.64161	-12.7906	3.30387245773046e-09	1.54957032415443e-05	11.2607	Inactive-Active
ENSG00000119681.12	LTBP2	-2.54694	4.51089	-12.4417	4.75431707464458e-09	1.54957032415443e-05	11.1693	Inactive-Active
ENSG00000092621.13	PHGDH	-2.0573	2.77773	-12.432	4.803050991703e-09	1.54957032415443e-05	10.8926	Inactive-Active
ENSG00000226742.4	HSBP1L1	1.28401	4.69937	12.3902	5.02053789469822e-09	1.54957032415443e-05	11.1716	Inactive-Active
ENSG00000149485.19	FADS1	-2.29682	3.53146	-12.3657	5.15236466925796e-09	1.54957032415443e-05	10.9389	Inactive-Active
ENSG00000082146.13	STRADB	1.45059	5.09756	12.2712	5.69773559827561e-09	1.54957032415443e-05	11.0541	Inactive-Active
ENSG00000197375.13	SLC22A5	2.17171	5.3308	12.229	5.96052531046038e-09	1.54957032415443e-05	11.0104	Inactive-Active
ENSG00000177181.15	RIMKLA	1.86866	4.40653	12.2177	6.03317344987285e-09	1.54957032415443e-05	10.989	Inactive-Active
ENSG00000128298.18	BAIAP2L2	1.56824	6.00564	12.0669	7.09699144626942e-09	1.68258748742669e-05	10.8337	Inactive-Active
ENSG00000040199.18	PHLPP2	2.03253	5.79533	11.6505	1.12140437793772e-08	2.34024954453303e-05	10.3777	Inactive-Active
ENSG00000161714.12	PLCD3	1.26114	7.156	11.6	1.18637137750575e-08	2.34024954453303e-05	10.2923	Inactive-Active
ENSG00000198959.12	TGM2	-3.16079	6.07894	-11.5788	1.21488571793675e-08	2.34024954453303e-05	10.3023	Inactive-Active
ENSG00000211897.9	IGHG3	-6.68863	8.15464	-11.4393	1.42147246491773e-08	2.38190554651622e-05	10.1423	Inactive-Active
ENSG00000164626.9	KCNK5	1.63096	5.42663	11.4028	1.48148437765632e-08	2.38190554651622e-05	10.1068	Inactive-Active
ENSG00000197043.14	ANXA6	-1.78279	6.32521	-11.4007	1.48503166463379e-08	2.38190554651622e-05	10.1018	Inactive-Active
ENSG00000182492.16	BGN	-3.87054	4.95216	-11.3531	1.56761776823891e-08	2.38190554651622e-05	10.0418	Inactive-Active
ENSG00000270550.1	IGHV3-30	-2.85663	7.52301	-11.2855	1.6933414595851e-08	2.38190554651622e-05	9.95479	Inactive-Active
ENSG00000133065.11	SLC41A1	-1.67274	3.76197	-11.2352	1.79384182507561e-08	2.38190554651622e-05	9.85678	Inactive-Active
ENSG00000156284.6	CLDN8	6.77468	2.31116	11.2246	1.81588055527011e-08	2.38190554651622e-05	9.85699	Inactive-Active
ENSG00000162745.11	OLFML2B	-3.2157	2.62961	-11.2062	1.85476568302097e-08	2.38190554651622e-05	9.59873	Inactive-Active
ENSG00000213626.13	LBH	-2.16919	5.38807	-11.1534	1.97118207446733e-08	2.43015210868631e-05	9.83058	Inactive-Active
ENSG00000162390.18	ACOT11	1.32882	5.23532	11.1035	2.0883044338245e-08	2.47552426749634e-05	9.76756	Inactive-Active
ENSG00000177191.2	B3GNT8	1.72508	3.97498	11.0452	2.23445146711501e-08	2.55066772844266e-05	9.70342	Inactive-Active
ENSG00000168077.14	SCARA3	-1.44169	3.75937	-10.9527	2.4895093667087e-08	2.7403274354046e-05	9.5441	Inactive-Active
ENSG00000140937.14	CDH11	-2.16423	5.26191	-10.8913	2.67558836468598e-08	2.82579881171256e-05	9.52969	Inactive-Active
ENSG00000071575.11	TRIB2	-2.32777	4.95432	-10.8679	2.75052608128798e-08	2.82579881171256e-05	9.50161	Inactive-Active
ENSG00000169855.20	ROBO1	-2.36506	4.82684	-10.8379	2.84976263194105e-08	2.83330755093726e-05	9.46434	Inactive-Active
ENSG00000075142.14	SRI	1.58013	7.44148	10.7276	3.24829971746e-08	3.05797854150664e-05	9.2595	Inactive-Active
ENSG00000154096.14	THY1	-3.34187	4.75297	-10.7209	3.27417318937474e-08	3.05797854150664e-05	9.32698	Inactive-Active
ENSG00000135069.14	PSAT1	-1.93308	2.95099	-10.6429	3.59427896541554e-08	3.25821388214919e-05	9.12414	Inactive-Active
ENSG00000141447.18	OSBPL1A	1.24466	5.05377	10.5503	4.01798767787103e-08	3.31749684607514e-05	9.12252	Inactive-Active
ENSG00000166821.9	PEX11A	1.5782	4.2996	10.5416	4.06047472048686e-08	3.31749684607514e-05	9.11867	Inactive-Active
ENSG00000122863.6	CHST3	-2.55221	2.81257	-10.5255	4.14013606264539e-08	3.31749684607514e-05	8.92496	Inactive-Active
ENSG00000244437.1	IGKV3-15	-2.93953	8.39695	-10.5071	4.23368966430254e-08	3.31749684607514e-05	8.99442	Inactive-Active
ENSG00000176834.14	VSIG10	1.62532	5.86755	10.5008	4.26594557401014e-08	3.31749684607514e-05	9.03613	Inactive-Active
ENSG00000151376.18	ME3	1.46367	4.54735	10.4932	4.30550189296277e-08	3.31749684607514e-05	9.06091	Inactive-Active
ENSG00000152990.14	ADGRA3	1.45492	6.08706	10.4651	4.45497876505305e-08	3.34894879311463e-05	8.98696	Inactive-Active
ENSG00000054938.16	CHRDL2	-8.6181	-0.44429	-10.4231	4.6886504226431e-08	3.41308367449759e-05	7.44696	Inactive-Active
ENSG00000188186.10	LAMTOR4	0.953282	5.8198	10.4085	4.77271093684049e-08	3.41308367449759e-05	8.93024	Inactive-Active
ENSG00000122756.15	CNTFR	4.73505	0.702193	10.3915	4.87251165367425e-08	3.41308367449759e-05	8.63662	Inactive-Active
ENSG00000249167.2	SEMA6A-AS2	2.76712	-0.45391	10.3527	5.10945971009953e-08	3.49952572722172e-05	7.97483	Inactive-Active
ENSG00000011083.9	SLC6A7	2.1681	3.83577	10.3323	5.23898015159572e-08	3.51023059244199e-05	8.8676	Inactive-Active
ENSG00000013016.16	EHD3	-2.41109	2.99883	-10.2549	5.76256776614554e-08	3.69379340686789e-05	8.64921	Inactive-Active
ENSG00000135074.16	ADAM19	-2.07729	5.35476	-10.221	6.00958327080502e-08	3.69379340686789e-05	8.72722	Inactive-Active
ENSG00000101049.17	SGK2	2.53404	5.22669	10.2184	6.02859436674326e-08	3.69379340686789e-05	8.70335	Inactive-Active
ENSG00000166750.10	SLFN5	-1.59208	5.68869	-10.2069	6.11500209529983e-08	3.69379340686789e-05	8.69857	Inactive-Active
ENSG00000110721.12	CHKA	1.43512	4.8725	10.2006	6.16318996354992e-08	3.69379340686789e-05	8.69955	Inactive-Active
ENSG00000176641.11	RNF152	1.84756	4.80411	10.1835	6.2953793262517e-08	3.69379340686789e-05	8.67363	Inactive-Active
ENSG00000163359.16	COL6A3	-3.09987	7.80774	-10.1758	6.35594629260856e-08	3.69379340686789e-05	8.59965	Inactive-Active
ENSG00000227502.3	MROCKI	1.92818	2.36219	10.1451	6.60296008556554e-08	3.69379340686789e-05	8.54883	Inactive-Active
ENSG00000151835.16	SACS	-1.49607	3.67994	-10.145	6.60377192127754e-08	3.69379340686789e-05	8.61604	Inactive-Active
ENSG00000211968.3	IGHV1-58	-3.91577	2.20225	-10.1146	6.85922497544818e-08	3.69379340686789e-05	8.36307	Inactive-Active
ENSG00000185565.12	LSAMP	-2.60272	3.29665	-10.1081	6.91482808276339e-08	3.69379340686789e-05	8.50835	Inactive-Active
ENSG00000198894.8	CIPC	1.23763	5.07997	10.0897	7.07535852672638e-08	3.69379340686789e-05	8.55346	Inactive-Active
ENSG00000241351.3	IGKV3-11	-2.57425	8.57644	-10.0632	7.31439140722331e-08	3.69379340686789e-05	8.42807	Inactive-Active
ENSG00000144815.16	NXPE3	-1.78186	4.27268	-10.0516	7.42152717140183e-08	3.69379340686789e-05	8.52364	Inactive-Active
ENSG00000116157.6	GPX7	-2.18782	2.11776	-10.0445	7.48755294982981e-08	3.69379340686789e-05	8.26842	Inactive-Active
ENSG00000181104.7	F2R	-1.82116	5.48797	-10.0329	7.59763106961238e-08	3.69379340686789e-05	8.4905	Inactive-Active
ENSG00000132718.9	SYT11	-2.389	3.25562	-10.0295	7.63029005918746e-08	3.69379340686789e-05	8.45248	Inactive-Active
ENSG00000061918.14	GUCY1B1	-2.93227	3.03013	-9.99797	7.93874999319516e-08	3.69379340686789e-05	8.34865	Inactive-Active
ENSG00000075239.14	ACAT1	1.40615	5.64135	9.99245	7.99403589584962e-08	3.69379340686789e-05	8.40797	Inactive-Active
ENSG00000074181.9	NOTCH3	-2.67634	5.02471	-9.9901	8.01773116810126e-08	3.69379340686789e-05	8.45024	Inactive-Active
ENSG00000111700.13	SLCO1B3	-6.76532	-2.52223	-9.98068	8.11349581146097e-08	3.69379340686789e-05	5.58698	Inactive-Active
ENSG00000143387.14	CTSK	-2.49883	6.03503	-9.97716	8.14957177466715e-08	3.69379340686789e-05	8.40784	Inactive-Active
ENSG00000171385.10	KCND3	-3.15894	3.27688	-9.9356	8.58879812549193e-08	3.6972566980725e-05	8.36007	Inactive-Active
ENSG00000131378.14	RFTN1	-1.93676	4.77444	-9.93395	8.606756134918e-08	3.6972566980725e-05	8.37995	Inactive-Active
ENSG00000211896.7	IGHG1	-5.68574	10.7032	-9.93064	8.64291527353414e-08	3.6972566980725e-05	8.21039	Inactive-Active
ENSG00000124256.15	ZBP1	-2.21217	4.45582	-9.92579	8.69612335900616e-08	3.6972566980725e-05	8.37124	Inactive-Active
ENSG00000105784.15	RUNDC3B	2.08371	2.29147	9.9126	8.84262252992818e-08	3.6972566980725e-05	8.28157	Inactive-Active
ENSG00000211459.2	MT-RNR1	1.14809	11.5827	9.89802	9.00763626473534e-08	3.6972566980725e-05	8.08433	Inactive-Active
ENSG00000008323.15	PLEKHG6	1.67827	5.89451	9.89214	9.0750596680014e-08	3.6972566980725e-05	8.26852	Inactive-Active
ENSG00000115461.5	IGFBP5	-4.37919	6.97919	-9.88852	9.11688488541936e-08	3.6972566980725e-05	8.2626	Inactive-Active
ENSG00000140511.12	HAPLN3	-3.56958	2.92217	-9.8679	9.35889868379623e-08	3.74611190043226e-05	8.22222	Inactive-Active
ENSG00000087116.16	ADAMTS2	-2.71605	4.29057	-9.82774	9.85004620437071e-08	3.89215735980654e-05	8.24651	Inactive-Active
ENSG00000118263.15	KLF7	-1.54133	4.21171	-9.75448	1.08178809186563e-07	4.14178433702447e-05	8.15683	Inactive-Active
ENSG00000103375.11	AQP8	7.26651	6.16649	9.75123	1.08629967496056e-07	4.14178433702447e-05	8.03918	Inactive-Active
ENSG00000162391.12	FAM151A	2.48855	1.22662	9.74717	1.09197252681704e-07	4.14178433702447e-05	7.93422	Inactive-Active
ENSG00000143416.21	SELENBP1	3.19845	8.71096	9.73247	1.11279084857389e-07	4.14178433702447e-05	7.94329	Inactive-Active
ENSG00000234460.2	AL772337.3	5.25581	-3.31425	9.73067	1.11536971536625e-07	4.14178433702447e-05	5.63883	Inactive-Active
ENSG00000197301.7	HMGA2-AS1	2.75097	-0.438343	9.71158	1.14309011435508e-07	4.19186285476858e-05	7.24234	Inactive-Active
ENSG00000148346.12	LCN2	-4.87774	6.7655	-9.68346	1.1852760821106e-07	4.19186285476858e-05	7.99111	Inactive-Active
ENSG00000184232.9	OAF	1.29296	6.38434	9.68308	1.1858538009325e-07	4.19186285476858e-05	7.98447	Inactive-Active
ENSG00000142484.7	TM4SF5	1.51437	2.67581	9.67947	1.19138439079458e-07	4.19186285476858e-05	8.02481	Inactive-Active
ENSG00000172366.20	MCRIP2	1.21965	5.73848	9.67592	1.19685906109352e-07	4.19186285476858e-05	8.00223	Inactive-Active
ENSG00000104415.14	CCN4	-4.65231	2.2373	-9.6595	1.22250892982399e-07	4.1950373747505e-05	7.81689	Inactive-Active
ENSG00000103222.20	ABCC1	-1.24277	4.61889	-9.65115	1.23578061518582e-07	4.1950373747505e-05	8.01943	Inactive-Active
ENSG00000149218.5	ENDOD1	1.30919	6.54009	9.6483	1.24034775667588e-07	4.1950373747505e-05	7.92821	Inactive-Active
ENSG00000130303.14	BST2	-1.42893	5.75809	-9.63486	1.26211117839305e-07	4.1950373747505e-05	7.96752	Inactive-Active
ENSG00000173706.14	HEG1	-1.91429	5.46694	-9.62655	1.27576226627182e-07	4.1950373747505e-05	7.97139	Inactive-Active
ENSG00000132357.14	CARD6	-2.09646	3.13881	-9.61721	1.29130738135798e-07	4.1950373747505e-05	7.93131	Inactive-Active
ENSG00000114554.11	PLXNA1	-1.22136	5.44213	-9.61401	1.2966791415942e-07	4.1950373747505e-05	7.94599	Inactive-Active
ENSG00000106415.13	GLCCI1	-1.4297	5.16704	-9.6081	1.30665321688475e-07	4.1950373747505e-05	7.95669	Inactive-Active
ENSG00000004468.13	CD38	-2.20799	4.33239	-9.5995	1.32132047727229e-07	4.19839365257828e-05	7.96101	Inactive-Active
ENSG00000100219.16	XBP1	-1.67758	8.89605	-9.57554	1.36311720135257e-07	4.28700359825385e-05	7.76321	Inactive-Active
ENSG00000103811.18	CTSH	-1.92586	6.02622	-9.56152	1.38822470706279e-07	4.32186602993762e-05	7.86212	Inactive-Active
ENSG00000029153.14	ARNTL2	-2.88425	3.36898	-9.52618	1.45369174326201e-07	4.32335770817329e-05	7.85275	Inactive-Active
ENSG00000127914.19	AKAP9	0.983225	8.38555	9.52192	1.46181459850503e-07	4.32335770817329e-05	7.68921	Inactive-Active
ENSG00000164330.17	EBF1	-2.52303	2.41276	-9.52038	1.46474877735123e-07	4.32335770817329e-05	7.69177	Inactive-Active
ENSG00000232406.7	AL121895.1	2.7777	-0.840099	9.52036	1.46480117637353e-07	4.32335770817329e-05	6.76515	Inactive-Active
ENSG00000137868.19	STRA6	-7.22091	-2.16439	-9.50343	1.49757684124133e-07	4.32335770817329e-05	5.39589	Inactive-Active
ENSG00000163947.12	ARHGEF3	-1.42825	4.34838	-9.50121	1.50193589601533e-07	4.32335770817329e-05	7.83242	Inactive-Active
ENSG00000256193.6	LINC00507	4.91692	-2.51912	9.50114	1.50206853839217e-07	4.32335770817329e-05	6.34513	Inactive-Active
ENSG00000167107.13	ACSF2	2.29516	5.55277	9.49641	1.51139899113519e-07	4.32335770817329e-05	7.76565	Inactive-Active
ENSG00000164116.17	GUCY1A1	-2.84762	4.14902	-9.49404	1.51610213501413e-07	4.32335770817329e-05	7.81925	Inactive-Active
ENSG00000158467.16	AHCYL2	1.559	7.86823	9.48758	1.52897696437782e-07	4.32335770817329e-05	7.65263	Inactive-Active
ENSG00000100234.12	TIMP3	-2.05221	6.53764	-9.47633	1.55167596833483e-07	4.34634295104567e-05	7.73846	Inactive-Active
ENSG00000253686.2	LINC01484	-3.95885	0.747318	-9.46293	1.57919382066492e-07	4.34634295104567e-05	6.92137	Inactive-Active
ENSG00000239951.1	IGKV3-20	-2.45831	9.67869	-9.46283	1.57941147437499e-07	4.34634295104567e-05	7.59379	Inactive-Active
ENSG00000099958.15	DERL3	-2.32484	4.60178	-9.44352	1.61997639259237e-07	4.41852145098136e-05	7.75893	Inactive-Active
ENSG00000033170.17	FUT8	-1.41566	5.23572	-9.42182	1.6668930661341e-07	4.50660624485254e-05	7.70628	Inactive-Active
ENSG00000163882.9	POLR2H	0.83569	5.72761	9.41194	1.6887159545015e-07	4.52590560292962e-05	7.65934	Inactive-Active
ENSG00000157193.18	LRP8	-2.13211	2.45342	-9.39561	1.72547249557772e-07	4.58455067122422e-05	7.60508	Inactive-Active
ENSG00000181577.16	C6orf223	-4.50756	0.705752	-9.38736	1.74437862414418e-07	4.59517039100409e-05	7.2586	Inactive-Active
ENSG00000140474.14	ULK3	0.839893	6.17988	9.37989	1.76165305142107e-07	4.60134819473296e-05	7.59473	Inactive-Active
ENSG00000162734.13	PEA15	-1.44045	6.31183	-9.35558	1.81920364251121e-07	4.69538871242384e-05	7.57063	Inactive-Active
ENSG00000111424.12	VDR	1.29032	6.96851	9.34518	1.84444576085221e-07	4.69538871242384e-05	7.50451	Inactive-Active
ENSG00000042445.14	RETSAT	1.46172	7.64461	9.34326	1.84912470237559e-07	4.69538871242384e-05	7.46968	Inactive-Active
ENSG00000174358.16	SLC6A19	6.57961	1.55883	9.33521	1.86896884061125e-07	4.69538871242384e-05	7.57891	Inactive-Active
ENSG00000111801.16	BTN3A3	-0.951846	5.45001	-9.32339	1.89850684998874e-07	4.69538871242384e-05	7.56331	Inactive-Active
ENSG00000242076.2	IGKV1-33	-2.83965	6.96097	-9.31831	1.91133885318358e-07	4.69538871242384e-05	7.51711	Inactive-Active
ENSG00000108846.16	ABCC3	1.04465	7.89085	9.3178	1.91264901167448e-07	4.69538871242384e-05	7.43177	Inactive-Active
ENSG00000224041.3	IGKV3D-15	-2.73146	4.15243	-9.31509	1.91953206503814e-07	4.69538871242384e-05	7.59293	Inactive-Active
ENSG00000103257.9	SLC7A5	-2.69343	4.09134	-9.28017	2.01077561544107e-07	4.87460789567135e-05	7.54974	Inactive-Active
ENSG00000117461.15	PIK3R3	-1.891	4.13691	-9.27508	2.02443077981225e-07	4.87460789567135e-05	7.5422	Inactive-Active
ENSG00000133985.3	TTC9	-2.6731	2.8348	-9.24965	2.09425734268543e-07	4.96788215611063e-05	7.44153	Inactive-Active
ENSG00000116132.12	PRRX1	-4.24305	2.60911	-9.24462	2.1083644754819e-07	4.96788215611063e-05	7.36883	Inactive-Active
ENSG00000237989.1	LINC01679	-3.57125	-0.191133	-9.2435	2.1115231901966e-07	4.96788215611063e-05	6.31707	Inactive-Active
ENSG00000157823.17	AP3S2	1.20586	4.85431	9.23297	2.14143496350463e-07	4.98355739170517e-05	7.44953	Inactive-Active
ENSG00000010818.10	HIVEP2	-1.34087	4.75825	-9.2298	2.15052442521913e-07	4.98355739170517e-05	7.465	Inactive-Active
ENSG00000108352.13	RAPGEFL1	1.79946	6.71197	9.20986	2.20869040701485e-07	5.08015276377648e-05	7.32887	Inactive-Active
ENSG00000165548.11	TMEM63C	3.21369	2.02736	9.19876	2.24175693836671e-07	5.11036770860422e-05	7.4129	Inactive-Active
ENSG00000182326.15	C1S	-1.99091	8.07894	-9.18796	2.27445557319446e-07	5.11036770860422e-05	7.27572	Inactive-Active
ENSG00000167232.14	ZNF91	1.36418	6.05418	9.18181	2.29329535047343e-07	5.11036770860422e-05	7.32652	Inactive-Active
ENSG00000179314.14	WSCD1	1.93269	4.39496	9.17879	2.30262903908392e-07	5.11036770860422e-05	7.38968	Inactive-Active
ENSG00000147065.17	MSN	-1.84394	7.24078	-9.17404	2.31734785906213e-07	5.11036770860422e-05	7.28946	Inactive-Active
ENSG00000102760.13	RGCC	-2.00782	3.57539	-9.17277	2.32131170047886e-07	5.11036770860422e-05	7.40455	Inactive-Active
ENSG00000124253.11	PCK1	5.34849	6.10629	9.16703	2.33926179409459e-07	5.11336083374392e-05	7.27277	Inactive-Active
ENSG00000198417.7	MT1F	3.24759	3.45755	9.14301	2.41607942151072e-07	5.2440833697452e-05	7.36992	Inactive-Active
ENSG00000110799.14	VWF	-2.82477	6.0419	-9.1308	2.4561344741646e-07	5.29374270127462e-05	7.28733	Inactive-Active
ENSG00000132170.23	PPARG	1.63011	5.75441	9.10519	2.5424567396387e-07	5.44174022030585e-05	7.22875	Inactive-Active
ENSG00000182871.16	COL18A1	-2.63509	6.42269	-9.089	2.59867622792732e-07	5.52371034627227e-05	7.21871	Inactive-Active
ENSG00000115841.21	RMDN2	1.99238	3.59961	9.0789	2.63440894851666e-07	5.56130946590631e-05	7.27944	Inactive-Active
ENSG00000155850.8	SLC26A2	4.57197	8.98865	9.06	2.70271946559182e-07	5.64091711262459e-05	7.01096	Inactive-Active
ENSG00000142765.18	SYTL1	-1.52525	5.1534	-9.0578	2.71076759502837e-07	5.64091711262459e-05	7.2257	Inactive-Active
ENSG00000175115.13	PACS1	-1.52382	5.1861	-9.0435	2.76386878049308e-07	5.64091711262459e-05	7.20104	Inactive-Active
ENSG00000128309.17	MPST	1.22088	6.7583	9.0397	2.77813760047527e-07	5.64091711262459e-05	7.09531	Inactive-Active
ENSG00000161013.17	MGAT4B	1.08761	7.86144	9.03874	2.78174673899008e-07	5.64091711262459e-05	7.04481	Inactive-Active
ENSG00000162493.17	PDPN	-3.64035	3.58666	-9.03862	2.78223238538509e-07	5.64091711262459e-05	7.21676	Inactive-Active
ENSG00000211592.8	IGKC	-2.48067	12.8884	-9.03386	2.80023463947166e-07	5.64091711262459e-05	6.9005	Inactive-Active
ENSG00000103742.12	IGDCC4	-2.20248	3.45114	-9.02718	2.82578546322697e-07	5.65542427026744e-05	7.19454	Inactive-Active
ENSG00000137825.11	ITPKA	1.96611	4.32531	9.0181	2.86086486079959e-07	5.6886913467551e-05	7.17461	Inactive-Active
ENSG00000184313.20	MROH7	3.0742	0.97944	9.00066	2.92957573994417e-07	5.75150867304711e-05	6.96006	Inactive-Active
ENSG00000090924.15	PLEKHG2	-1.87035	4.65003	-9.0006	2.92977794902306e-07	5.75150867304711e-05	7.1715	Inactive-Active
ENSG00000171503.12	ETFDH	1.22459	5.62432	8.99031	2.97113448234089e-07	5.79578075191319e-05	7.08474	Inactive-Active
ENSG00000036672.16	USP2	1.98366	3.67809	8.96975	3.05564562294662e-07	5.91449101886582e-05	7.13121	Inactive-Active
ENSG00000057657.17	PRDM1	-1.40219	5.48308	-8.96179	3.0890043575441e-07	5.91449101886582e-05	7.07322	Inactive-Active
ENSG00000198944.6	SOWAHA	1.90134	4.30517	8.96071	3.09358753655607e-07	5.91449101886582e-05	7.08856	Inactive-Active
ENSG00000182985.18	CADM1	-2.03269	4.20993	-8.95713	3.10874905115429e-07	5.91449101886582e-05	7.12191	Inactive-Active
ENSG00000205403.14	CFI	-3.15135	1.25349	-8.94873	3.14462959618161e-07	5.94605084563887e-05	6.78211	Inactive-Active
ENSG00000073417.15	PDE8A	1.23203	6.43143	8.93462	3.20595181502051e-07	6.02503907870409e-05	6.96886	Inactive-Active
ENSG00000168081.9	PNOC	-2.50651	1.14271	-8.92767	3.23659637227298e-07	6.03656957989056e-05	6.7318	Inactive-Active
ENSG00000168502.17	MTCL1	-2.76962	2.75573	-8.92437	3.25125904500773e-07	6.03656957989056e-05	7.03634	Inactive-Active
ENSG00000256518.3	FOLR1P1	4.55675	-4.11167	8.91456	3.29527326835997e-07	6.04572944525396e-05	4.73199	Inactive-Active
ENSG00000196924.19	FLNA	-2.02257	8.31273	-8.91172	3.30811514435599e-07	6.04572944525396e-05	6.87704	Inactive-Active
ENSG00000159403.18	C1R	-2.14398	5.87863	-8.90577	3.33519379450218e-07	6.04572944525396e-05	6.9858	Inactive-Active
ENSG00000100364.19	KIAA0930	-1.14104	6.02796	-8.90272	3.34921939991886e-07	6.04572944525396e-05	6.96249	Inactive-Active
ENSG00000182158.15	CREB3L2	-1.20132	6.53417	-8.90105	3.35687880345881e-07	6.04572944525396e-05	6.93988	Inactive-Active
ENSG00000104870.13	FCGRT	1.14717	7.78036	8.89737	3.37388619637157e-07	6.04572944525396e-05	6.85498	Inactive-Active
ENSG00000144452.15	ABCA12	-6.47736	0.318889	-8.87808	3.46449692707007e-07	6.17221154851021e-05	6.27159	Inactive-Active
ENSG00000167476.10	JSRP1	-3.38739	2.05394	-8.84113	3.64532010635396e-07	6.45703511482388e-05	6.81569	Inactive-Active
ENSG00000109819.9	PPARGC1A	2.25429	4.53546	8.83133	3.69493699862082e-07	6.50752304197099e-05	6.90515	Inactive-Active
ENSG00000211951.2	IGHV2-26	-3.87397	3.52813	-8.827	3.71709904790935e-07	6.50935850884171e-05	6.93553	Inactive-Active
ENSG00000140848.17	CPNE2	0.930726	5.74523	8.8217	3.74442712217339e-07	6.51541297313953e-05	6.84463	Inactive-Active
ENSG00000029534.21	ANK1	-2.63577	0.952191	-8.81644	3.77170363582323e-07	6.51541297313953e-05	6.46784	Inactive-Active
ENSG00000005882.12	PDK2	1.35101	4.30989	8.81409	3.78397495925497e-07	6.51541297313953e-05	6.90054	Inactive-Active
ENSG00000058668.15	ATP2B4	-1.45941	6.00324	-8.80812	3.81535947404487e-07	6.51918304225525e-05	6.84047	Inactive-Active
ENSG00000070610.14	GBA2	0.881589	7.1061	8.80181	3.84879506253356e-07	6.51918304225525e-05	6.75264	Inactive-Active
ENSG00000164294.14	GPX8	-2.03258	3.7393	-8.80153	3.85027473895966e-07	6.51918304225525e-05	6.91483	Inactive-Active
ENSG00000085563.15	ABCB1	2.29149	5.55164	8.7977	3.87077154126314e-07	6.51918304225525e-05	6.80693	Inactive-Active
ENSG00000137076.21	TLN1	-0.885813	7.64805	-8.78979	3.91333838219706e-07	6.55505447161389e-05	6.72254	Inactive-Active
ENSG00000078098.14	FAP	-4.69765	1.06792	-8.78184	3.95671617229968e-07	6.57982275987315e-05	6.29438	Inactive-Active
ENSG00000157654.19	PALM2AKAP2	-1.4954	6.19328	-8.77927	3.97082195041175e-07	6.57982275987315e-05	6.79362	Inactive-Active
ENSG00000135083.16	CCNJL	1.94444	4.11194	8.7722	4.00990697680228e-07	6.60905577176594e-05	6.84721	Inactive-Active
ENSG00000170382.12	LRRN2	2.74831	3.71919	8.73827	4.20339149143431e-07	6.89110261476047e-05	6.81686	Inactive-Active
ENSG00000155380.13	SLC16A1	1.90023	4.31397	8.73213	4.2394400692533e-07	6.9134276388601e-05	6.7758	Inactive-Active
ENSG00000114812.13	VIPR1	2.35599	6.05761	8.727	4.26983365411509e-07	6.92603668587978e-05	6.68315	Inactive-Active
ENSG00000100767.17	PAPLN	-1.77353	4.64987	-8.72316	4.29269246278058e-07	6.92603668587978e-05	6.79258	Inactive-Active
ENSG00000166289.6	PLEKHF1	-1.68039	2.64497	-8.71706	4.3293296683409e-07	6.92603668587978e-05	6.77871	Inactive-Active
ENSG00000117592.9	PRDX6	1.72355	7.58215	8.71074	4.36763829614578e-07	6.92603668587978e-05	6.59076	Inactive-Active
ENSG00000150995.20	ITPR1	-1.49424	4.49655	-8.70938	4.37587602355762e-07	6.92603668587978e-05	6.77321	Inactive-Active
ENSG00000140274.14	DUOXA2	-7.76551	3.40287	-8.70328	4.41327895843081e-07	6.92603668587978e-05	6.77918	Inactive-Active
ENSG00000164220.7	F2RL2	-2.67541	2.55942	-8.70255	4.41778683039454e-07	6.92603668587978e-05	6.70297	Inactive-Active
ENSG00000154451.14	GBP5	-2.32545	4.08396	-8.70106	4.42694665039524e-07	6.92603668587978e-05	6.77404	Inactive-Active
ENSG00000211949.3	IGHV3-23	-2.6037	8.46534	-8.69211	4.48258879554973e-07	6.97767016503223e-05	6.57377	Inactive-Active
ENSG00000138669.9	PRKG2	3.92054	1.9964	8.6802	4.55773472684042e-07	7.05899206110294e-05	6.73369	Inactive-Active
ENSG00000101017.14	CD40	-2.11425	3.89631	-8.66023	4.68679977623379e-07	7.22259279516508e-05	6.72103	Inactive-Active
ENSG00000118473.22	SGIP1	-2.69044	2.44343	-8.64864	4.76350426326503e-07	7.2726660817933e-05	6.60862	Inactive-Active
ENSG00000049768.16	FOXP3	-2.62304	1.08134	-8.64819	4.76648567055659e-07	7.2726660817933e-05	6.39364	Inactive-Active
ENSG00000175497.17	DPP10	4.52248	0.0523158	8.64136	4.81231132821754e-07	7.30641613039373e-05	6.52821	Inactive-Active
ENSG00000268104.3	SLC6A14	-6.07746	3.08391	-8.6323	4.87387245625463e-07	7.31017204231273e-05	6.66101	Inactive-Active
ENSG00000205364.4	MT1M	4.99631	2.32058	8.63142	4.87989476611148e-07	7.31017204231273e-05	6.67922	Inactive-Active
ENSG00000144857.14	BOC	-1.93344	3.01262	-8.63053	4.88593958896993e-07	7.31017204231273e-05	6.66019	Inactive-Active
ENSG00000183853.18	KIRREL1	-1.75253	5.03823	-8.62103	4.95154892361976e-07	7.35622663760279e-05	6.63335	Inactive-Active
ENSG00000065717.15	TLE2	1.57872	4.9403	8.61755	4.97581770512684e-07	7.35622663760279e-05	6.59957	Inactive-Active
ENSG00000144821.10	MYH15	2.15786	2.13264	8.6152	4.99227939668799e-07	7.35622663760279e-05	6.64136	Inactive-Active
ENSG00000253549.6	CA3-AS1	2.19391	1.59586	8.61236	5.01219166768303e-07	7.35622663760279e-05	6.61745	Inactive-Active
ENSG00000147883.12	CDKN2B	2.15654	6.47497	8.60349	5.07508052932577e-07	7.39941519698999e-05	6.48424	Inactive-Active
ENSG00000142273.13	CBLC	1.23843	5.11235	8.60145	5.08963376192167e-07	7.39941519698999e-05	6.56288	Inactive-Active
ENSG00000102265.12	TIMP1	-3.11882	5.99103	-8.59172	5.15975645723429e-07	7.42929666811522e-05	6.53858	Inactive-Active
ENSG00000186204.15	CYP4F12	2.02461	5.70961	8.5896	5.17522675319059e-07	7.42929666811522e-05	6.51297	Inactive-Active
ENSG00000122591.13	FAM126A	-1.53274	4.17899	-8.5886	5.1825014880918e-07	7.42929666811522e-05	6.6178	Inactive-Active
ENSG00000134352.20	IL6ST	-1.04116	7.36098	-8.58263	5.22622670765006e-07	7.45729321094826e-05	6.44187	Inactive-Active
ENSG00000172965.17	MIR4435-2HG	-2.12748	2.91925	-8.57234	5.30255150025899e-07	7.50276198203375e-05	6.58578	Inactive-Active
ENSG00000132915.11	PDE6A	4.35676	1.88036	8.57178	5.3067782099327e-07	7.50276198203375e-05	6.59058	Inactive-Active
ENSG00000074657.14	ZNF532	-1.2464	4.80183	-8.54925	5.47810686985005e-07	7.70962245824878e-05	6.53722	Inactive-Active
ENSG00000225697.13	SLC26A6	1.05562	6.27988	8.54069	5.54474159271891e-07	7.72984254366046e-05	6.41941	Inactive-Active
ENSG00000092929.12	UNC13D	-1.63021	5.87532	-8.53811	5.56500075490059e-07	7.72984254366046e-05	6.45211	Inactive-Active
ENSG00000172716.16	SLFN11	-1.44719	5.08173	-8.53777	5.5677137169223e-07	7.72984254366046e-05	6.51086	Inactive-Active
ENSG00000121361.5	KCNJ8	-3.96587	0.445612	-8.52395	5.67757519960518e-07	7.84701996533773e-05	6.04976	Inactive-Active
ENSG00000128165.9	ADM2	-1.76053	2.98153	-8.51142	5.77917248606097e-07	7.87159435834345e-05	6.51586	Inactive-Active
ENSG00000011201.12	ANOS1	-2.30162	1.32804	-8.50869	5.80155203698022e-07	7.87159435834345e-05	6.27766	Inactive-Active
ENSG00000261371.6	PECAM1	-2.39424	7.01256	-8.50835	5.80439297893515e-07	7.87159435834345e-05	6.37056	Inactive-Active
ENSG00000148218.16	ALAD	0.80556	6.15343	8.50701	5.81545740891367e-07	7.87159435834345e-05	6.37721	Inactive-Active
ENSG00000163453.11	IGFBP7	-1.78525	6.77296	-8.50608	5.82305413095716e-07	7.87159435834345e-05	6.37732	Inactive-Active
ENSG00000102096.9	PIM2	-2.4006	6.49922	-8.48698	5.98298818854378e-07	8.02174000894038e-05	6.36854	Inactive-Active
ENSG00000080573.7	COL5A3	-2.14434	4.31604	-8.4866	5.98617891066574e-07	8.02174000894038e-05	6.47421	Inactive-Active
ENSG00000204991.11	SPIRE2	1.58949	5.9319	8.48088	6.03498470614123e-07	8.05213262458783e-05	6.34433	Inactive-Active
ENSG00000287335.1	AL139351.3	-4.93357	-3.03407	-8.47113	6.11921244627136e-07	8.10639919546034e-05	4.33126	Inactive-Active
ENSG00000118985.16	ELL2	-1.77459	5.84761	-8.47009	6.12825999332357e-07	8.10639919546034e-05	6.35879	Inactive-Active
ENSG00000148090.12	AUH	0.974315	4.42699	8.46132	6.2051483434512e-07	8.17302893562006e-05	6.39769	Inactive-Active
ENSG00000151746.15	BICD1	-1.55325	3.13962	-8.45601	6.25219489765636e-07	8.19921647950832e-05	6.43378	Inactive-Active
ENSG00000104886.12	PLEKHJ1	0.974	6.33725	8.45309	6.27823590786789e-07	8.19921647950832e-05	6.28379	Inactive-Active
ENSG00000120896.13	SORBS3	0.897364	5.87344	8.44421	6.35806605769755e-07	8.26843687613065e-05	6.30218	Inactive-Active
ENSG00000133107.15	TRPC4	-2.94485	0.18105	-8.43774	6.41695309559309e-07	8.30995425879305e-05	5.92915	Inactive-Active
ENSG00000171310.11	CHST11	-1.87695	4.32957	-8.42205	6.56209039046484e-07	8.44217706399301e-05	6.37861	Inactive-Active
ENSG00000151090.20	THRB	2.03241	4.21953	8.41847	6.59575900507804e-07	8.44217706399301e-05	6.34023	Inactive-Active
ENSG00000116574.6	RHOU	1.64685	2.5778	8.41409	6.63715588361281e-07	8.44217706399301e-05	6.38335	Inactive-Active
ENSG00000185269.12	NOTUM	-5.53359	-2.98846	-8.41214	6.65562962290299e-07	8.44217706399301e-05	4.41062	Inactive-Active
ENSG00000164175.15	SLC45A2	5.15413	-3.09927	8.4121	6.65601059845658e-07	8.44217706399301e-05	4.51474	Inactive-Active
ENSG00000213694.6	S1PR3	-2.86725	2.93525	-8.40372	6.73611999617142e-07	8.49946575556733e-05	6.34801	Inactive-Active
ENSG00000198759.12	EGFL6	-5.71277	0.240996	-8.40091	6.76326976650363e-07	8.49946575556733e-05	5.6988	Inactive-Active
ENSG00000164379.7	FOXQ1	-3.22753	1.62894	-8.39878	6.7839089447765e-07	8.49946575556733e-05	6.17254	Inactive-Active
ENSG00000176273.15	SLC35G1	2.22271	4.11244	8.38925	6.8769664892643e-07	8.58117344800061e-05	6.30379	Inactive-Active
ENSG00000244116.3	IGKV2-28	-2.70444	7.6474	-8.37041	7.06502817478317e-07	8.78029166834645e-05	6.14106	Inactive-Active
ENSG00000218274.2	AL121949.2	6.48539	-1.3528	8.35615	7.21090360150394e-07	8.92559276714671e-05	5.84049	Inactive-Active
ENSG00000140279.13	DUOX2	-6.35537	6.4832	-8.33925	7.3880292684161e-07	9.1082580032741e-05	6.1486	Inactive-Active
ENSG00000135736.6	CCDC102A	-1.7669	2.52459	-8.33132	7.47263439779755e-07	9.13874233913062e-05	6.23924	Inactive-Active
ENSG00000110090.13	CPT1A	1.37386	7.82859	8.33115	7.47454738428679e-07	9.13874233913062e-05	6.0292	Inactive-Active
ENSG00000130734.10	ATG4D	1.01738	4.83013	8.32804	7.50795761530296e-07	9.13874233913062e-05	6.18098	Inactive-Active
ENSG00000153012.12	LGI2	-3.17836	1.67686	-8.3218	7.57571819320723e-07	9.13874233913062e-05	6.08118	Inactive-Active
ENSG00000197562.10	RAB40C	0.770436	5.33225	8.32059	7.58883562231532e-07	9.13874233913062e-05	6.15028	Inactive-Active
ENSG00000154217.15	PITPNC1	-1.59372	4.33938	-8.32043	7.59066233677505e-07	9.13874233913062e-05	6.2163	Inactive-Active
ENSG00000167123.19	CERCAM	-2.04353	4.63649	-8.31189	7.68445576274839e-07	9.21566580014273e-05	6.21158	Inactive-Active
ENSG00000128595.17	CALU	-1.48588	6.99496	-8.30502	7.76093561059873e-07	9.21654777971961e-05	6.06312	Inactive-Active
ENSG00000172831.14	CES2	1.34544	8.19947	8.30281	7.78569355993819e-07	9.21654777971961e-05	5.96818	Inactive-Active
ENSG00000211632.4	IGKV3D-11	-2.33415	2.84775	-8.30121	7.80356771795596e-07	9.21654777971961e-05	6.19676	Inactive-Active
ENSG00000006747.15	SCIN	1.8372	5.95665	8.30057	7.81080895454084e-07	9.21654777971961e-05	6.08016	Inactive-Active
ENSG00000134013.16	LOXL2	-2.57438	5.11672	-8.29845	7.83470853731721e-07	9.21654777971961e-05	6.1711	Inactive-Active
ENSG00000136048.14	DRAM1	-1.50506	4.57747	-8.28901	7.94211803079422e-07	9.30015965414747e-05	6.17443	Inactive-Active
ENSG00000143297.19	FCRL5	-2.06882	5.55944	-8.28573	7.97971793504418e-07	9.30015965414747e-05	6.13523	Inactive-Active
ENSG00000109790.17	KLHL5	-2.25835	4.01168	-8.28429	7.99630871272534e-07	9.30015965414747e-05	6.19522	Inactive-Active
ENSG00000211651.3	IGLV1-44	-2.90322	7.92335	-8.26789	8.18800935795773e-07	9.39657038300944e-05	5.96802	Inactive-Active
ENSG00000073711.11	PPP2R3A	1.28926	4.13233	8.26769	8.19030110591537e-07	9.39657038300944e-05	6.13009	Inactive-Active
ENSG00000114999.8	TTL	-0.862613	4.75312	-8.2669	8.19972790008866e-07	9.39657038300944e-05	6.1206	Inactive-Active
ENSG00000185070.11	FLRT2	-2.3798	3.17994	-8.26373	8.23736611087351e-07	9.39657038300944e-05	6.16615	Inactive-Active
ENSG00000061656.11	SPAG4	-2.6148	3.03149	-8.2599	8.28310464863904e-07	9.39657038300944e-05	6.15649	Inactive-Active
ENSG00000154122.14	ANKH	0.941363	6.59389	8.25823	8.30317271080363e-07	9.39657038300944e-05	5.99157	Inactive-Active
ENSG00000140545.15	MFGE8	-1.40003	6.07271	-8.2544	8.34929483124352e-07	9.39657038300944e-05	6.04005	Inactive-Active
ENSG00000116962.15	NID1	-1.66004	6.37985	-8.25407	8.35318546219044e-07	9.39657038300944e-05	6.03054	Inactive-Active
ENSG00000075618.18	FSCN1	-2.30003	4.7801	-8.25404	8.35359100919693e-07	9.39657038300944e-05	6.11866	Inactive-Active
ENSG00000162733.19	DDR2	-1.58689	5.45562	-8.24609	8.4502349633884e-07	9.47071606569432e-05	6.0695	Inactive-Active
ENSG00000148158.17	SNX30	1.23807	5.66874	8.23535	8.58268103906207e-07	9.58430479365696e-05	6.00216	Inactive-Active
ENSG00000157350.13	ST3GAL2	-1.53885	4.87897	-8.22892	8.66304279917548e-07	9.6391206539129e-05	6.07337	Inactive-Active
ENSG00000141401.12	IMPA2	1.35865	5.9851	8.22317	8.73560560007309e-07	9.68489569064218e-05	5.96162	Inactive-Active
ENSG00000085265.11	FCN1	-5.10305	1.32558	-8.21559	8.8321761736201e-07	9.75686386548907e-05	5.94675	Inactive-Active
ENSG00000261183.5	SPINT1-AS1	1.81438	2.45985	8.21094	8.89201731921924e-07	9.78788806413058e-05	6.09829	Inactive-Active
ENSG00000107731.12	UNC5B	0.851014	5.69616	8.1945	9.10686124464602e-07	9.98870357370943e-05	5.95534	Inactive-Active
ENSG00000005001.10	PRSS22	-3.69366	1.09104	-8.18833	9.18904589416903e-07	0.000100317	5.87283	Inactive-Active
ENSG00000187764.12	SEMA4D	-1.29581	5.59778	-8.18667	9.21120034165616e-07	0.000100317	5.97005	Inactive-Active
ENSG00000111799.22	COL12A1	-3.38894	5.9808	-8.17963	9.30604838017006e-07	0.000100994	5.96829	Inactive-Active
ENSG00000165804.16	ZNF219	0.944776	5.26671	8.17525	9.36561085825083e-07	0.000101283	5.93974	Inactive-Active
ENSG00000135917.16	SLC19A3	2.37097	2.98468	8.15691	9.61923495447468e-07	0.000103662	6.02115	Inactive-Active
ENSG00000163430.12	FSTL1	-2.00472	7.14886	-8.14756	9.75128302537741e-07	0.000103723	5.83058	Inactive-Active
ENSG00000173890.17	GPR160	1.29844	6.2118	8.14684	9.76151304459329e-07	0.000103723	5.84038	Inactive-Active
ENSG00000258311.5	AC009779.3	1.56879	1.01817	8.14595	9.77421536779552e-07	0.000103723	5.88427	Inactive-Active
ENSG00000171488.15	LRRC8C	-1.54097	3.74991	-8.14493	9.78882588063135e-07	0.000103723	6.00088	Inactive-Active
ENSG00000272636.4	DOC2B	-2.53103	0.660823	-8.14349	9.80941739250609e-07	0.000103723	5.71653	Inactive-Active
ENSG00000135093.13	USP30	1.20351	4.4113	8.14228	9.82675476482536e-07	0.000103723	5.93795	Inactive-Active
ENSG00000004700.16	RECQL	-0.951067	4.20721	-8.13193	9.97646883337808e-07	0.000104944	5.9533	Inactive-Active
ENSG00000128284.19	APOL3	-1.3026	5.04047	-8.12481	1.00808765269243e-06	0.000105681	5.90167	Inactive-Active
ENSG00000168918.14	INPP5D	-1.59593	4.50301	-8.11028	1.02974539700324e-06	0.000107586	5.91781	Inactive-Active
ENSG00000166963.13	MAP1A	-1.82911	2.69334	-8.10487	1.0379278600686e-06	0.000108074	5.92666	Inactive-Active
ENSG00000239264.9	TXNDC5	-1.03306	4.53907	-8.0841	1.07000658686044e-06	0.000110362	5.87291	Inactive-Active
ENSG00000128609.16	NDUFA5	0.812712	6.4339	8.08399	1.07018136139442e-06	0.000110362	5.73722	Inactive-Active
ENSG00000012660.14	ELOVL5	-2.11197	4.94844	-8.08358	1.0708363602905e-06	0.000110362	5.8535	Inactive-Active
ENSG00000162437.14	RAVER2	1.61948	6.2032	8.08122	1.07454208820213e-06	0.000110362	5.73617	Inactive-Active
ENSG00000143179.16	UCK2	0.985977	5.21826	8.07815	1.07939168290763e-06	0.000110362	5.79407	Inactive-Active
ENSG00000166278.15	C2	-2.2745	1.79767	-8.07689	1.08138838401258e-06	0.000110362	5.83581	Inactive-Active
ENSG00000267940.1	AC022762.2	1.52993	1.51071	8.07346	1.0868473269714e-06	0.000110554	5.86091	Inactive-Active
ENSG00000166130.15	IKBIP	-1.76814	3.76804	-8.06529	1.09997659111943e-06	0.000111448	5.88562	Inactive-Active
ENSG00000187498.16	COL4A1	-2.76056	7.23935	-8.0635	1.10287721733608e-06	0.000111448	5.70433	Inactive-Active
ENSG00000167705.12	RILP	0.926465	4.44957	8.05977	1.10893442273483e-06	0.000111694	5.80851	Inactive-Active
ENSG00000170476.16	MZB1	-2.0954	6.91497	-8.05028	1.12451603220467e-06	0.000112166	5.70701	Inactive-Active
ENSG00000134871.19	COL4A2	-2.27127	7.54871	-8.04876	1.12703541578965e-06	0.000112166	5.65984	Inactive-Active
ENSG00000166147.14	FBN1	-2.14281	5.76751	-8.04825	1.12787923786734e-06	0.000112166	5.76592	Inactive-Active
ENSG00000128294.16	TPST2	-1.30493	4.98203	-8.04733	1.12941331105374e-06	0.000112166	5.79416	Inactive-Active
ENSG00000157570.12	TSPAN18	-2.55141	3.20468	-8.04423	1.13457265635574e-06	0.000112166	5.86201	Inactive-Active
ENSG00000246430.7	LINC00968	-4.0431	-4.25006	-8.04222	1.13792866513731e-06	0.000112166	3.66838	Inactive-Active
ENSG00000113657.13	DPYSL3	-1.88496	5.76048	-8.04043	1.14093724257368e-06	0.000112166	5.75098	Inactive-Active
ENSG00000137819.14	PAQR5	2.15999	4.838	8.03936	1.14273090395685e-06	0.000112166	5.74883	Inactive-Active
ENSG00000164403.15	SHROOM1	1.25902	6.20192	8.03303	1.15344192664293e-06	0.000112562	5.66857	Inactive-Active
ENSG00000139182.15	CLSTN3	-1.5047	4.75529	-8.02799	1.16203459739079e-06	0.000112562	5.78535	Inactive-Active
ENSG00000175040.6	CHST2	-2.64884	4.08638	-8.02688	1.16394096204624e-06	0.000112562	5.82427	Inactive-Active
ENSG00000183386.10	FHL3	-1.91095	2.36985	-8.02651	1.16457972483102e-06	0.000112562	5.80303	Inactive-Active
ENSG00000095066.12	HOOK2	1.08644	6.33394	8.02625	1.16502942550535e-06	0.000112562	5.65736	Inactive-Active
ENSG00000061273.18	HDAC7	-1.30578	5.85101	-8.01915	1.17727604258157e-06	0.000113173	5.70976	Inactive-Active
ENSG00000132386.11	SERPINF1	-1.71883	5.85769	-8.01834	1.17869549809524e-06	0.000113173	5.70804	Inactive-Active
ENSG00000159674.12	SPON2	-1.85999	5.83859	-8.01122	1.19114136377239e-06	0.000114013	5.70156	Inactive-Active
ENSG00000135100.18	HNF1A	1.42983	3.24245	8.00719	1.19823943587314e-06	0.000114337	5.7953	Inactive-Active
ENSG00000173153.17	ESRRA	1.02368	6.88116	7.99699	1.21642729047171e-06	0.000115438	5.57615	Inactive-Active
ENSG00000100417.12	PMM1	1.08166	4.45037	7.99653	1.21726205209286e-06	0.000115438	5.72154	Inactive-Active
ENSG00000162545.6	CAMK2N1	1.72185	7.27774	7.99351	1.22269587030486e-06	0.000115597	5.54582	Inactive-Active
ENSG00000107819.13	SFXN3	-1.29763	4.88598	-7.9905	1.22815964381208e-06	0.000115759	5.71273	Inactive-Active
ENSG00000121905.10	HPCA	2.22471	0.225973	7.98796	1.23277440429589e-06	0.000115839	5.57522	Inactive-Active
ENSG00000111341.10	MGP	-3.14291	3.0967	-7.97965	1.24802249145909e-06	0.000116492	5.76685	Inactive-Active
ENSG00000050767.18	COL23A1	-2.378	2.64144	-7.97763	1.25175414472923e-06	0.000116492	5.72686	Inactive-Active
ENSG00000155545.20	MIER3	1.83492	6.50197	7.97364	1.2591659970108e-06	0.000116492	5.55369	Inactive-Active
ENSG00000160991.16	ORAI2	-1.78439	5.36207	-7.97191	1.26239626658199e-06	0.000116492	5.66742	Inactive-Active
ENSG00000178764.8	ZHX2	-1.23532	4.3284	-7.97095	1.26420849806693e-06	0.000116492	5.71425	Inactive-Active
ENSG00000139540.12	SLC39A5	2.24608	6.12966	7.97053	1.26498222638834e-06	0.000116492	5.56146	Inactive-Active
ENSG00000089327.15	FXYD5	-1.79816	4.23574	-7.9699	1.26617508212756e-06	0.000116492	5.72467	Inactive-Active
ENSG00000091490.11	SEL1L3	-0.744959	8.06628	-7.96734	1.27098232318735e-06	0.000116517	5.48824	Inactive-Active
ENSG00000187231.14	SESTD1	-1.08118	4.55789	-7.96573	1.2740116995674e-06	0.000116517	5.68685	Inactive-Active
ENSG00000156345.18	CDK20	1.56891	3.19332	7.95394	1.29647249564488e-06	0.000117853	5.71982	Inactive-Active
ENSG00000077463.15	SIRT6	0.865514	5.84965	7.95286	1.29855161709665e-06	0.000117853	5.56799	Inactive-Active
ENSG00000168268.11	NT5DC2	-1.35752	4.6232	-7.95037	1.30334381604672e-06	0.000117853	5.66752	Inactive-Active
ENSG00000137094.15	DNAJB5	-2.12646	2.53847	-7.94624	1.31136812244236e-06	0.000117853	5.69889	Inactive-Active
ENSG00000182022.18	CHST15	-2.02457	5.04186	-7.94427	1.31519445798995e-06	0.000117853	5.65083	Inactive-Active
ENSG00000188747.8	NOXA1	0.979724	4.87793	7.94381	1.31609281270009e-06	0.000117853	5.61604	Inactive-Active
ENSG00000100629.17	CEP128	-1.60734	3.12392	-7.94333	1.31702899585676e-06	0.000117853	5.71718	Inactive-Active
ENSG00000198727.2	MT-CYB	1.23683	12.5914	7.94046	1.3226631885753e-06	0.000117853	5.27199	Inactive-Active
ENSG00000134824.14	FADS2	-2.68956	3.8005	-7.94027	1.32303040489937e-06	0.000117853	5.71113	Inactive-Active
ENSG00000254645.2	AC087379.1	4.68309	1.94792	7.93432	1.33476556160326e-06	0.000118318	5.70429	Inactive-Active
ENSG00000105369.10	CD79A	-2.58204	6.10402	-7.93374	1.33592589017184e-06	0.000118318	5.58296	Inactive-Active
ENSG00000157184.7	CPT2	0.954916	4.72521	7.93107	1.34124314390556e-06	0.000118448	5.59868	Inactive-Active
ENSG00000267534.4	S1PR2	-1.81268	2.67723	-7.92341	1.35659988173687e-06	0.000119024	5.67811	Inactive-Active
ENSG00000266010.2	GATA6-AS1	2.41919	2.52457	7.92283	1.35776038973907e-06	0.000119024	5.68774	Inactive-Active
ENSG00000004399.13	PLXND1	-1.54376	5.96225	-7.92205	1.35934325476923e-06	0.000119024	5.55377	Inactive-Active
ENSG00000122188.13	LAX1	-2.75555	4.26694	-7.91604	1.37154647751986e-06	0.000119752	5.65503	Inactive-Active
ENSG00000144843.11	ADPRH	-1.69827	2.95735	-7.90112	1.40233582500329e-06	0.00012207	5.6544	Inactive-Active
ENSG00000065308.5	TRAM2	-1.08181	6.48915	-7.89936	1.40602095217977e-06	0.00012207	5.47585	Inactive-Active
ENSG00000228393.4	LINC01004	1.58391	2.35809	7.89174	1.42206640510211e-06	0.000123117	5.63682	Inactive-Active
ENSG00000137699.17	TRIM29	-3.38619	2.80343	-7.88654	1.43315162503313e-06	0.000123729	5.63003	Inactive-Active
ENSG00000156298.13	TSPAN7	1.28222	4.83656	7.88124	1.44451326857417e-06	0.000124167	5.52078	Inactive-Active
ENSG00000014914.21	MTMR11	1.72692	7.04047	7.87882	1.44973275033852e-06	0.000124167	5.38567	Inactive-Active
ENSG00000122641.11	INHBA	-4.41565	2.22757	-7.87856	1.4503108881401e-06	0.000124167	5.53721	Inactive-Active
ENSG00000204262.14	COL5A2	-2.24645	6.80041	-7.87658	1.45458764161121e-06	0.000124188	5.44994	Inactive-Active
ENSG00000071054.16	MAP4K4	-1.27993	6.34196	-7.87457	1.4589640668508e-06	0.000124202	5.45325	Inactive-Active
ENSG00000198624.13	CCDC69	-1.79131	5.58346	-7.87159	1.46547158114522e-06	0.000124202	5.50422	Inactive-Active
ENSG00000122971.9	ACADS	1.63251	6.58758	7.86849	1.47226097497121e-06	0.000124202	5.38883	Inactive-Active
ENSG00000176014.13	TUBB6	-1.84064	4.63776	-7.86534	1.47921367782376e-06	0.000124202	5.5515	Inactive-Active
ENSG00000263400.8	TMEM220-AS1	1.54786	0.699584	7.86472	1.48059166260079e-06	0.000124202	5.47921	Inactive-Active
ENSG00000135363.12	LMO2	-1.56779	3.82076	-7.86346	1.48336419615309e-06	0.000124202	5.58498	Inactive-Active
ENSG00000211964.3	IGHV3-48	-2.69169	6.07374	-7.86154	1.48762513207362e-06	0.000124202	5.4656	Inactive-Active
ENSG00000165757.9	JCAD	-2.2132	3.35705	-7.86036	1.49026255377279e-06	0.000124202	5.59723	Inactive-Active
ENSG00000111684.11	LPCAT3	0.864857	4.51778	7.86002	1.49102589516797e-06	0.000124202	5.5096	Inactive-Active
ENSG00000026508.20	CD44	-1.52362	7.49333	-7.85506	1.50211599674876e-06	0.000124269	5.35809	Inactive-Active
ENSG00000274993.1	AC254629.1	1.78159	4.55859	7.85483	1.50262745784063e-06	0.000124269	5.49275	Inactive-Active
ENSG00000172367.16	PDZD3	2.08384	5.34167	7.85426	1.50391545124494e-06	0.000124269	5.4419	Inactive-Active
ENSG00000129667.13	RHBDF2	-1.30537	4.7035	-7.84621	1.52212357623107e-06	0.000125437	5.51404	Inactive-Active
ENSG00000119121.22	TRPM6	3.98445	5.21062	7.84181	1.53218452448842e-06	0.000125929	5.39959	Inactive-Active
ENSG00000196628.20	TCF4	-1.37443	6.4955	-7.83835	1.54013498186212e-06	0.00012598	5.40221	Inactive-Active
ENSG00000187091.14	PLCD1	1.46341	5.18404	7.83799	1.54097679789597e-06	0.00012598	5.42157	Inactive-Active
ENSG00000138448.12	ITGAV	-1.21446	6.9798	-7.83327	1.55189613174743e-06	0.000126167	5.34374	Inactive-Active
ENSG00000187688.15	TRPV2	-1.31381	3.54228	-7.83252	1.55364087597729e-06	0.000126167	5.55153	Inactive-Active
ENSG00000143603.19	KCNN3	-1.92748	3.50118	-7.83003	1.5594460540692e-06	0.000126167	5.55298	Inactive-Active
ENSG00000240498.9	CDKN2B-AS1	3.55734	4.22244	7.82995	1.55963535730519e-06	0.000126167	5.45657	Inactive-Active
ENSG00000257955.1	AC004801.3	3.46458	-4.67104	7.82341	1.57500132981451e-06	0.000126699	3.57542	Inactive-Active
ENSG00000129128.13	SPCS3	-0.781766	7.10678	-7.82101	1.58068461939714e-06	0.000126699	5.31576	Inactive-Active
ENSG00000186567.13	CEACAM19	1.41893	2.92308	7.81812	1.58754744532546e-06	0.000126699	5.53155	Inactive-Active
ENSG00000162461.8	SLC25A34	2.02368	2.65991	7.81811	1.58755623084379e-06	0.000126699	5.53424	Inactive-Active
ENSG00000197476.3	AC034105.1	-4.12243	-4.21402	-7.81779	1.58833385872072e-06	0.000126699	3.52611	Inactive-Active
ENSG00000170581.14	STAT2	-0.839331	6.81681	-7.81672	1.59088070198892e-06	0.000126699	5.33339	Inactive-Active
ENSG00000136457.10	CHAD	2.89367	1.91192	7.81421	1.59687495559655e-06	0.000126849	5.52654	Inactive-Active
ENSG00000176658.17	MYO1D	1.5298	8.45724	7.80427	1.62088872191552e-06	0.000128132	5.19777	Inactive-Active
ENSG00000137571.11	SLCO5A1	-1.83154	1.24514	-7.80199	1.62644391809008e-06	0.000128132	5.41805	Inactive-Active
ENSG00000107130.10	NCS1	-2.62943	2.24318	-7.80089	1.62912493795713e-06	0.000128132	5.49666	Inactive-Active
ENSG00000211648.2	IGLV1-47	-3.03815	7.15309	-7.79817	1.63580465798081e-06	0.000128132	5.31413	Inactive-Active
ENSG00000103522.16	IL21R	-3.31504	2.157	-7.79572	1.64181746344204e-06	0.000128132	5.43675	Inactive-Active
ENSG00000106333.13	PCOLCE	-2.22512	4.78691	-7.79531	1.64282568796503e-06	0.000128132	5.44321	Inactive-Active
ENSG00000135414.10	GDF11	-1.23978	3.41398	-7.79531	1.64284762912131e-06	0.000128132	5.49999	Inactive-Active
ENSG00000113721.14	PDGFRB	-2.19398	5.91258	-7.79392	1.64628264013867e-06	0.000128132	5.37805	Inactive-Active
ENSG00000184985.16	SORCS2	-2.78889	2.58081	-7.78482	1.66894160300956e-06	0.000129568	5.45491	Inactive-Active
ENSG00000020181.18	ADGRA2	-1.69421	5.50263	-7.78109	1.67832953677171e-06	0.000129969	5.3767	Inactive-Active
ENSG00000187583.11	PLEKHN1	-2.06634	1.08368	-7.77712	1.6884000812888e-06	0.000130283	5.2714	Inactive-Active
ENSG00000258013.2	RPL3P13	3.65678	-4.29812	7.77616	1.69083861991209e-06	0.000130283	3.55878	Inactive-Active
ENSG00000113361.13	CDH6	-2.493	1.7147	-7.76988	1.70689805330454e-06	0.000131146	5.37811	Inactive-Active
ENSG00000145423.5	SFRP2	-6.66711	-0.323094	-7.76846	1.7105489927504e-06	0.000131146	4.74461	Inactive-Active
ENSG00000272686.1	WASL-DT	1.58485	3.13738	7.75639	1.74193067891217e-06	0.000133221	5.42326	Inactive-Active
ENSG00000151067.22	CACNA1C	-2.67744	1.23052	-7.75086	1.75651079637834e-06	0.000134004	5.28314	Inactive-Active
ENSG00000172985.11	SH3RF3	-1.29331	3.55053	-7.74596	1.76954984051581e-06	0.000134421	5.42313	Inactive-Active
ENSG00000085552.17	IGSF9	2.90402	4.97464	7.74552	1.77071083861134e-06	0.000134421	5.28159	Inactive-Active
ENSG00000068745.15	IP6K2	1.06224	6.70887	7.73691	1.79388327142933e-06	0.000135477	5.19294	Inactive-Active
ENSG00000174233.12	ADCY6	1.25915	7.04599	7.73472	1.79982428784037e-06	0.000135477	5.16589	Inactive-Active
ENSG00000107186.17	MPDZ	-1.78251	3.52933	-7.73463	1.80005712210627e-06	0.000135477	5.40816	Inactive-Active
ENSG00000165376.12	CLDN2	-5.36249	1.56781	-7.73272	1.80527485761786e-06	0.000135477	5.25111	Inactive-Active
ENSG00000148516.22	ZEB1	-1.34162	4.84441	-7.73223	1.80659616358228e-06	0.000135477	5.33481	Inactive-Active
ENSG00000008513.16	ST3GAL1	-1.83537	5.02054	-7.72915	1.81504083830038e-06	0.00013578	5.31119	Inactive-Active
ENSG00000177989.13	ODF3B	-1.64453	3.78651	-7.72343	1.83079055857082e-06	0.000136627	5.37629	Inactive-Active
ENSG00000198189.11	HSD17B11	1.03335	7.06276	7.72029	1.83949809563181e-06	0.000136945	5.14122	Inactive-Active
ENSG00000091879.14	ANGPT2	-2.68383	2.45639	-7.70977	1.86899425020131e-06	0.000138805	5.36356	Inactive-Active
ENSG00000266094.8	RASSF5	-1.77958	4.99466	-7.7068	1.87741795185351e-06	0.000139096	5.28332	Inactive-Active
ENSG00000198804.2	MT-CO1	1.27245	15.2349	7.70146	1.89264903288841e-06	0.000139782	4.84446	Inactive-Active
ENSG00000101445.10	PPP1R16B	-1.77034	4.88764	-7.70038	1.89575021270796e-06	0.000139782	5.28143	Inactive-Active
ENSG00000101342.10	TLDC2	1.27219	2.75974	7.69587	1.90876066084361e-06	0.000140406	5.35251	Inactive-Active
ENSG00000154783.12	FGD5	-1.66183	4.10032	-7.6923	1.91911539465864e-06	0.000140831	5.3187	Inactive-Active
ENSG00000164932.13	CTHRC1	-4.01484	2.07902	-7.69039	1.92468156815201e-06	0.000140904	5.28169	Inactive-Active
ENSG00000237172.4	B3GNT9	-1.71385	3.08741	-7.68793	1.93186913028044e-06	0.000141095	5.3455	Inactive-Active
ENSG00000163629.13	PTPN13	-1.44412	3.54119	-7.68314	1.94594079754313e-06	0.0001414	5.32406	Inactive-Active
ENSG00000138080.14	EMILIN1	-1.40886	7.00471	-7.68188	1.94966087767367e-06	0.0001414	5.1275	Inactive-Active
ENSG00000074416.14	MGLL	1.05291	8.20676	7.67749	1.96270622005084e-06	0.0001414	5.01531	Inactive-Active
ENSG00000131196.18	NFATC1	-2.26218	3.03432	-7.67584	1.96762447039744e-06	0.0001414	5.32651	Inactive-Active
ENSG00000239975.2	IGKV1D-33	-2.78069	3.88345	-7.67574	1.96791724899066e-06	0.0001414	5.32015	Inactive-Active
ENSG00000143515.19	ATP8B2	-1.47035	5.37024	-7.67034	1.98409844761511e-06	0.0001414	5.21304	Inactive-Active
ENSG00000164692.18	COL1A2	-2.76759	8.95742	-7.67023	1.98444207911971e-06	0.0001414	5.01847	Inactive-Active
ENSG00000124225.16	PMEPA1	-1.557	5.97404	-7.66954	1.98650532939932e-06	0.0001414	5.15605	Inactive-Active
ENSG00000049192.15	ADAMTS6	-3.20812	0.895498	-7.66942	1.98687107227805e-06	0.0001414	5.09243	Inactive-Active
ENSG00000130529.16	TRPM4	1.52226	7.59813	7.66878	1.98880645386615e-06	0.0001414	5.03008	Inactive-Active
ENSG00000167767.14	KRT80	-2.83717	-0.477815	-7.66871	1.9890073296501e-06	0.0001414	4.70635	Inactive-Active
ENSG00000091039.17	OSBPL8	-1.14695	5.90755	-7.66598	1.9972858790726e-06	0.0001414	5.15485	Inactive-Active
ENSG00000166670.10	MMP10	-5.64155	0.668662	-7.66579	1.99786686180448e-06	0.0001414	4.88069	Inactive-Active
ENSG00000113319.13	RASGRF2	-1.69455	2.92318	-7.66416	2.00282740045553e-06	0.0001414	5.3107	Inactive-Active
ENSG00000235106.10	BRD3OS	-1.25573	2.74162	-7.66226	2.00861328431709e-06	0.0001414	5.30761	Inactive-Active
ENSG00000117280.13	RAB29	-1.37488	4.26546	-7.66198	2.00944539142447e-06	0.0001414	5.25146	Inactive-Active
ENSG00000133789.15	SWAP70	-1.36835	5.689	-7.65948	2.01711705805375e-06	0.000141616	5.15596	Inactive-Active
ENSG00000151790.9	TDO2	-4.10413	2.30433	-7.6557	2.02872725880633e-06	0.000141999	5.1938	Inactive-Active
ENSG00000137265.15	IRF4	-1.57979	6.13628	-7.65471	2.03178206213318e-06	0.000141999	5.14821	Inactive-Active
ENSG00000143507.18	DUSP10	-1.99397	2.28765	-7.65283	2.03758331030342e-06	0.000142082	5.28821	Inactive-Active
ENSG00000149131.17	SERPING1	-1.7292	6.0984	-7.64776	2.05336880225166e-06	0.00014286	5.12759	Inactive-Active
ENSG00000206075.14	SERPINB5	-3.53601	4.06101	-7.64582	2.05943787398953e-06	0.000142959	5.2611	Inactive-Active
ENSG00000156381.9	ANKRD9	1.42759	6.40341	7.64261	2.06950923989289e-06	0.000143336	5.05533	Inactive-Active
ENSG00000141542.11	RAB40B	1.3427	4.50308	7.63316	2.09949593459122e-06	0.000145052	5.16433	Inactive-Active
ENSG00000197381.16	ADARB1	-1.5588	3.82316	-7.63185	2.10370160515386e-06	0.000145052	5.23385	Inactive-Active
ENSG00000134827.8	TCN1	-7.59081	-0.00517797	-7.62456	2.12718183720959e-06	0.000146343	4.69598	Inactive-Active
ENSG00000240671.4	IGKV1-8	-2.3883	3.85892	-7.62033	2.14094624621188e-06	0.000146962	5.23395	Inactive-Active
ENSG00000271952.2	LINC01954	4.48311	-2.98161	7.61575	2.15596589686112e-06	0.000147595	4.09342	Inactive-Active
ENSG00000240990.10	HOXA11-AS	2.19129	3.03769	7.61372	2.16264089317831e-06	0.000147595	5.22468	Inactive-Active
ENSG00000037280.16	FLT4	-1.89703	2.68406	-7.61315	2.16453231911511e-06	0.000147595	5.22717	Inactive-Active
ENSG00000106351.13	AGFG2	1.45682	5.89227	7.61093	2.17185333679978e-06	0.000147619	5.04009	Inactive-Active
ENSG00000243466.1	IGKV1-5	-2.5016	9.02864	-7.61015	2.17446575097967e-06	0.000147619	4.9107	Inactive-Active
ENSG00000161791.14	FMNL3	-1.49737	4.96778	-7.60555	2.18976376559698e-06	0.000148331	5.13054	Inactive-Active
ENSG00000167792.13	NDUFV1	0.829311	7.34703	7.60197	2.20176012786534e-06	0.000148817	4.94513	Inactive-Active
ENSG00000129657.16	SEC14L1	-1.34725	6.26292	-7.59879	2.21249568295879e-06	0.000149215	5.02707	Inactive-Active
ENSG00000169946.14	ZFPM2	-1.91574	1.1339	-7.59448	2.22711426985532e-06	0.000149873	5.08728	Inactive-Active
ENSG00000236830.7	CBR3-AS1	1.49267	2.33838	7.58782	2.24989155859769e-06	0.000151076	5.19744	Inactive-Active
ENSG00000160685.13	ZBTB7B	0.852906	7.30896	7.58344	2.26501871671385e-06	0.000151351	4.91321	Inactive-Active
ENSG00000100614.18	PPM1A	0.69823	6.6252	7.58254	2.26812076341655e-06	0.000151351	4.95583	Inactive-Active
ENSG00000166923.12	GREM1	-5.59597	-1.92744	-7.58237	2.26871940430096e-06	0.000151351	3.83526	Inactive-Active
ENSG00000163501.7	IHH	1.5308	5.77225	7.56519	2.3291620028286e-06	0.000155048	4.97003	Inactive-Active
ENSG00000166341.9	DCHS1	-1.37891	4.78936	-7.5624	2.33912999235617e-06	0.000155376	5.08727	Inactive-Active
ENSG00000182934.12	SRPRA	-0.78901	7.03735	-7.55928	2.3503299155957e-06	0.000155556	4.91357	Inactive-Active
ENSG00000147853.17	AK3	0.816668	6.78071	7.55759	2.35641978112388e-06	0.000155556	4.91147	Inactive-Active
ENSG00000211970.3	IGHV4-61	-2.37982	5.32143	-7.55624	2.36129532225701e-06	0.000155556	5.05449	Inactive-Active
ENSG00000136098.17	NEK3	1.03223	4.74543	7.55604	2.36203470983345e-06	0.000155556	5.02991	Inactive-Active
ENSG00000275234.1	AC010503.4	1.33567	3.51162	7.55398	2.36951211194077e-06	0.000155716	5.09352	Inactive-Active
ENSG00000104267.10	CA2	2.33906	8.84968	7.54308	2.40943129673812e-06	0.000157495	4.76082	Inactive-Active
ENSG00000145623.13	OSMR	-2.23796	4.54858	-7.542	2.41344043765905e-06	0.000157495	5.06831	Inactive-Active
ENSG00000026652.15	AGPAT4	-1.91091	3.4827	-7.54049	2.41905687979e-06	0.000157495	5.10759	Inactive-Active
ENSG00000183722.9	LHFPL6	-1.61827	4.27507	-7.54019	2.42013752224427e-06	0.000157495	5.08212	Inactive-Active
ENSG00000284428.1	AC092329.4	1.41603	1.56802	7.53751	2.43013408525988e-06	0.000157495	5.08675	Inactive-Active
ENSG00000155304.6	HSPA13	-1.10554	5.24473	-7.53691	2.43237302623044e-06	0.000157495	4.99897	Inactive-Active
ENSG00000106624.11	AEBP1	-2.22944	6.70974	-7.53677	2.43288160923691e-06	0.000157495	4.92421	Inactive-Active
ENSG00000114650.20	SCAP	0.633624	6.43765	7.53555	2.43747186361979e-06	0.000157495	4.89266	Inactive-Active
ENSG00000078401.7	EDN1	1.45307	3.94102	7.53032	2.45710468797507e-06	0.000158432	5.04754	Inactive-Active
ENSG00000039523.20	RIPOR1	-1.43498	4.62612	-7.52602	2.47341143897877e-06	0.000158857	5.034	Inactive-Active
ENSG00000185386.15	MAPK11	-2.12804	2.6578	-7.52568	2.47470564715715e-06	0.000158857	5.10267	Inactive-Active
ENSG00000117480.16	FAAH	1.5795	5.48641	7.5245	2.47916753979764e-06	0.000158857	4.92609	Inactive-Active
ENSG00000006118.15	TMEM132A	-2.80796	3.85846	-7.5228	2.48565854861253e-06	0.00015887	5.07184	Inactive-Active
ENSG00000108821.14	COL1A1	-3.08413	9.16587	-7.52095	2.49275175134648e-06	0.00015887	4.77844	Inactive-Active
ENSG00000113140.11	SPARC	-2.16095	8.62042	-7.52041	2.49482972962786e-06	0.00015887	4.79288	Inactive-Active
ENSG00000141338.14	ABCA8	2.13571	5.00268	7.51059	2.53279366561193e-06	0.000160955	4.96172	Inactive-Active
ENSG00000145214.14	DGKQ	0.88063	6.1017	7.50732	2.54555477033313e-06	0.000161356	4.86725	Inactive-Active
ENSG00000166396.13	SERPINB7	-8.44677	-0.353216	-7.5063	2.54956761308626e-06	0.000161356	4.29228	Inactive-Active
ENSG00000168924.15	LETM1	0.890366	6.58674	7.49825	2.58134936307596e-06	0.000162729	4.81949	Inactive-Active
ENSG00000146729.10	NIPSNAP2	0.902109	5.79554	7.49813	2.5818318360527e-06	0.000162729	4.87873	Inactive-Active
ENSG00000110900.16	TSPAN11	-1.50153	5.0874	-7.4912	2.60953660982162e-06	0.00016414	4.95398	Inactive-Active
ENSG00000175183.10	CSRP2	-2.49837	2.84556	-7.48424	2.63768579845861e-06	0.000165573	5.04315	Inactive-Active
ENSG00000233006.8	MIR3936HG	2.41518	2.74118	7.47871	2.66027813062735e-06	0.000166651	5.0286	Inactive-Active
ENSG00000170801.10	HTRA3	-2.79963	3.7001	-7.47192	2.68828031936233e-06	0.000168064	5.01271	Inactive-Active
ENSG00000166128.13	RAB8B	-1.41096	5.0571	-7.46774	2.70571146556832e-06	0.000168811	4.90575	Inactive-Active
ENSG00000165269.13	AQP7	3.22918	2.61742	7.46536	2.71565787618242e-06	0.000169089	5.00574	Inactive-Active
ENSG00000132640.15	BTBD3	0.922911	5.81856	7.4612	2.73313858892019e-06	0.000169835	4.81518	Inactive-Active
ENSG00000278484.1	AC010998.3	3.27466	-0.536883	7.45735	2.74945738955231e-06	0.000170174	4.68174	Inactive-Active
ENSG00000067836.13	ROGDI	1.30657	4.49461	7.45731	2.74964279298825e-06	0.000170174	4.89362	Inactive-Active
ENSG00000240250.3	RN7SL541P	3.02833	-1.28961	7.45432	2.76235317253205e-06	0.000170304	4.50939	Inactive-Active
ENSG00000111145.8	ELK3	-1.83264	5.03738	-7.45422	2.76279414783906e-06	0.000170304	4.89364	Inactive-Active
ENSG00000117266.16	CDK18	1.15963	4.89415	7.44779	2.79039755555752e-06	0.000171407	4.85485	Inactive-Active
ENSG00000105088.8	OLFM2	-1.68094	1.9474	-7.44717	2.79307243554589e-06	0.000171407	4.94612	Inactive-Active
ENSG00000133561.15	GIMAP6	-1.30556	5.01145	-7.44601	2.79807871748187e-06	0.000171407	4.87653	Inactive-Active
ENSG00000065833.9	ME1	-1.78948	4.37402	-7.44403	2.80666535914499e-06	0.000171407	4.90386	Inactive-Active
ENSG00000142686.8	C1orf216	-1.51887	2.88571	-7.44361	2.80848925566479e-06	0.000171407	4.98341	Inactive-Active
ENSG00000273066.5	AL355987.4	2.23433	1.88896	7.44062	2.82153901822333e-06	0.000171863	4.97549	Inactive-Active
ENSG00000226715.4	LINC01709	-5.09396	-3.46886	-7.43796	2.83314542551427e-06	0.00017223	3.24558	Inactive-Active
ENSG00000106004.5	HOXA5	1.57327	4.01321	7.4319	2.85987773965692e-06	0.000173512	4.88596	Inactive-Active
ENSG00000254003.1	SRI-AS1	3.0118	-1.6014	7.42865	2.87429584126195e-06	0.000174045	4.24312	Inactive-Active
ENSG00000064692.20	SNCAIP	-2.1605	2.0123	-7.42619	2.88527410570604e-06	0.000174367	4.9159	Inactive-Active
ENSG00000140451.13	PIF1	-1.21853	3.11144	-7.4177	2.92351439176221e-06	0.000176215	4.93797	Inactive-Active
ENSG00000134954.14	ETS1	-1.27345	7.0668	-7.41686	2.92728610146278e-06	0.000176215	4.6963	Inactive-Active
ENSG00000026950.17	BTN3A1	-0.714634	6.33795	-7.41068	2.95549050088677e-06	0.000177231	4.71926	Inactive-Active
ENSG00000088888.18	MAVS	0.945448	7.83665	7.41064	2.95567241664762e-06	0.000177231	4.61728	Inactive-Active
ENSG00000161533.12	ACOX1	1.38863	6.99839	7.40729	2.97107780276805e-06	0.000177809	4.65129	Inactive-Active
ENSG00000099139.14	PCSK5	1.16717	5.71881	7.40388	2.98683909319685e-06	0.000178406	4.72739	Inactive-Active
ENSG00000132274.16	TRIM22	-1.3354	5.92936	-7.39303	3.03762226054481e-06	0.000181088	4.73656	Inactive-Active
ENSG00000178078.12	STAP2	1.55211	6.72098	7.3883	3.05999884059088e-06	0.00018207	4.62882	Inactive-Active
ENSG00000151135.10	TMEM263	-0.893489	5.56531	-7.38388	3.08110603190992e-06	0.000182973	4.72586	Inactive-Active
ENSG00000170989.10	S1PR1	-2.1457	4.02598	-7.38102	3.09483535085114e-06	0.000183434	4.84973	Inactive-Active
ENSG00000069966.19	GNB5	-1.47596	3.13255	-7.37726	3.11298042044152e-06	0.000183751	4.87832	Inactive-Active
ENSG00000118257.17	NRP2	-1.74614	3.76539	-7.37556	3.12123361986564e-06	0.000183751	4.84889	Inactive-Active
ENSG00000243649.9	CFB	-2.56221	1.26081	-7.37526	3.12267508141165e-06	0.000183751	4.79983	Inactive-Active
ENSG00000183496.6	MEX3B	-1.54519	1.86689	-7.37499	3.12403068930751e-06	0.000183751	4.84055	Inactive-Active
ENSG00000176532.4	PRR15	1.80523	6.65742	7.37266	3.13535882857751e-06	0.000184066	4.60703	Inactive-Active
ENSG00000124102.5	PI3	-4.45946	5.89383	-7.36748	3.16072339441108e-06	0.000185203	4.68316	Inactive-Active
ENSG00000203747.12	FCGR3A	-3.07376	3.93599	-7.3654	3.17097807141984e-06	0.000185451	4.82243	Inactive-Active
ENSG00000181350.12	LRRC75A	1.51816	5.29025	7.35971	3.19922244575568e-06	0.000186229	4.67553	Inactive-Active
ENSG00000174807.4	CD248	-2.79578	3.57519	-7.3586	3.20478628597044e-06	0.000186229	4.84445	Inactive-Active
ENSG00000119403.15	PHF19	-1.01979	4.33428	-7.35791	3.20821729037624e-06	0.000186229	4.7777	Inactive-Active
ENSG00000278535.5	DHRS11	2.47695	5.60525	7.35749	3.21031319342844e-06	0.000186229	4.63863	Inactive-Active
ENSG00000269837.1	IPO5P1	1.52617	2.83279	7.35665	3.21449455360238e-06	0.000186229	4.84404	Inactive-Active
ENSG00000157110.16	RBPMS	-1.5175	4.76557	-7.35014	3.24730794513723e-06	0.000187777	4.75034	Inactive-Active
ENSG00000151388.11	ADAMTS12	-2.76805	2.19869	-7.33922	3.30309702700771e-06	0.000190646	4.79756	Inactive-Active
ENSG00000176903.5	PNMA1	-1.25625	4.82402	-7.3352	3.32387227815085e-06	0.000191486	4.69942	Inactive-Active
ENSG00000109113.20	RAB34	-1.6228	3.9966	-7.3258	3.37303903164909e-06	0.000193956	4.76545	Inactive-Active
ENSG00000235026.6	DPP10-AS1	4.95667	-1.26175	7.32211	3.39251750187785e-06	0.000194401	4.51378	Inactive-Active
ENSG00000151617.17	EDNRA	-2.64796	2.98643	-7.32195	3.39338395942137e-06	0.000194401	4.80068	Inactive-Active
ENSG00000133048.13	CHI3L1	-7.69348	2.44125	-7.31434	3.43401341741759e-06	0.000196363	4.78264	Inactive-Active
ENSG00000103710.11	RASL12	-2.03221	3.03374	-7.3119	3.44710867177164e-06	0.000196747	4.78222	Inactive-Active
ENSG00000148842.18	CNNM2	1.24645	4.93487	7.3091	3.46227469980522e-06	0.000197247	4.62271	Inactive-Active
ENSG00000101144.13	BMP7	-2.34574	2.62941	-7.29713	3.52776867633797e-06	0.000200608	4.76306	Inactive-Active
ENSG00000199959.1	AL359273.1	3.72603	-4.27324	7.29362	3.54721750040253e-06	0.000200959	3.14837	Inactive-Active
ENSG00000100344.11	PNPLA3	-2.91138	-0.70192	-7.2929	3.55117960342606e-06	0.000200959	3.96888	Inactive-Active
ENSG00000100985.7	MMP9	-3.26382	4.30047	-7.29127	3.56029471437495e-06	0.000200959	4.71471	Inactive-Active
ENSG00000183508.5	TENT5C	-1.18604	7.21791	-7.29095	3.5620727589416e-06	0.000200959	4.48843	Inactive-Active
ENSG00000211956.2	IGHV4-34	-3.68021	5.89592	-7.29015	3.56654396935614e-06	0.000200959	4.60325	Inactive-Active
ENSG00000135045.7	C9orf40	1.15482	3.56774	7.28078	3.61928273262946e-06	0.000203558	4.67293	Inactive-Active
ENSG00000225762.1	LINC01389	2.26993	0.253387	7.27735	3.63881017706715e-06	0.000203968	4.57554	Inactive-Active
ENSG00000170190.16	SLC16A5	0.982002	4.69046	7.27718	3.63980181102161e-06	0.000203968	4.59744	Inactive-Active
ENSG00000150457.9	LATS2	-1.41864	4.08882	-7.27516	3.65136994523192e-06	0.000204245	4.66292	Inactive-Active
ENSG00000180535.4	BHLHA15	-1.84015	4.12224	-7.27111	3.67464233864265e-06	0.000205174	4.67873	Inactive-Active
ENSG00000157227.14	MMP14	-1.60346	7.64736	-7.26637	3.70206321373068e-06	0.000206331	4.42297	Inactive-Active
ENSG00000093183.14	SEC22C	-0.960633	4.56405	-7.26361	3.71818111703114e-06	0.000206856	4.61681	Inactive-Active
ENSG00000086015.22	MAST2	0.962691	6.68828	7.2615	3.73052426149556e-06	0.000207125	4.43572	Inactive-Active
ENSG00000230728.1	AL590093.1	4.46193	-2.86953	7.26048	3.73646301312848e-06	0.000207125	3.60089	Inactive-Active
ENSG00000205847.6	OR7E91P	3.95368	-4.03628	7.25908	3.74473166426836e-06	0.000207211	3.10525	Inactive-Active
ENSG00000149634.4	SPATA25	2.21867	0.302709	7.25655	3.75962913965643e-06	0.000207662	4.54414	Inactive-Active
ENSG00000136044.12	APPL2	1.29203	6.86588	7.25211	3.78593447240246e-06	0.000208333	4.40827	Inactive-Active
ENSG00000152137.8	HSPB8	-2.70039	1.94971	-7.25205	3.7863421499702e-06	0.000208333	4.65978	Inactive-Active
ENSG00000134324.12	LPIN1	-1.10349	5.57341	-7.25109	3.79204583006961e-06	0.000208333	4.5232	Inactive-Active
ENSG00000064666.15	CNN2	-1.30707	6.05934	-7.24482	3.82960245010464e-06	0.000210022	4.47583	Inactive-Active
ENSG00000138411.13	HECW2	-2.193	2.24315	-7.24161	3.84902409567262e-06	0.000210517	4.6661	Inactive-Active
ENSG00000187193.9	MT1X	3.00932	2.78628	7.24107	3.85229052681556e-06	0.000210517	4.67107	Inactive-Active
ENSG00000229719.5	MIR194-2HG	2.05902	5.27434	7.23958	3.86131147100864e-06	0.000210636	4.49172	Inactive-Active
ENSG00000204564.12	C6orf136	1.19368	4.04745	7.23687	3.87784190987626e-06	0.000210825	4.56887	Inactive-Active
ENSG00000244514.3	RN7SL125P	3.52345	-4.63354	7.23677	3.87845246062763e-06	0.000210825	3.03347	Inactive-Active
ENSG00000222375.1	RN7SKP127	5.85554	-1.97564	7.23461	3.89160762919607e-06	0.000211168	4.02327	Inactive-Active
ENSG00000167608.12	TMC4	0.971999	6.33417	7.23289	3.90219440367708e-06	0.00021137	4.40731	Inactive-Active
ENSG00000074695.6	LMAN1	-0.805529	7.32221	-7.2289	3.92680786344553e-06	0.000212208	4.36696	Inactive-Active
ENSG00000164296.7	TIGD6	1.32374	2.85566	7.22625	3.94320451996431e-06	0.000212208	4.64432	Inactive-Active
ENSG00000153317.15	ASAP1	-1.29519	4.93681	-7.22607	3.94430618301459e-06	0.000212208	4.53777	Inactive-Active
ENSG00000179981.11	TSHZ1	0.76387	5.12247	7.22501	3.95089301927027e-06	0.000212208	4.48367	Inactive-Active
ENSG00000072110.15	ACTN1	-1.16683	7.04178	-7.22482	3.9520982318459e-06	0.000212208	4.38376	Inactive-Active
ENSG00000060237.19	WNK1	-0.621967	6.69295	-7.22328	3.9617187960756e-06	0.000212355	4.39744	Inactive-Active
ENSG00000155926.14	SLA	-1.93768	4.58163	-7.22053	3.97893177008282e-06	0.000212564	4.55283	Inactive-Active
ENSG00000106299.8	WASL	0.946131	6.97674	7.22045	3.97940461712582e-06	0.000212564	4.3506	Inactive-Active
ENSG00000158186.13	MRAS	-1.94144	2.83078	-7.21891	3.98908644722678e-06	0.000212618	4.64419	Inactive-Active
ENSG00000102401.20	ARMCX3	-0.85765	5.87691	-7.21809	3.99422460044806e-06	0.000212618	4.44314	Inactive-Active
ENSG00000169715.15	MT1E	2.79954	5.67979	7.21383	4.02117853132317e-06	0.000213684	4.42068	Inactive-Active
ENSG00000128512.23	DOCK4	-1.22082	4.0358	-7.20857	4.05464895911054e-06	0.000215092	4.55655	Inactive-Active
ENSG00000244187.8	TMEM141	1.29332	4.73275	7.20499	4.07762076114879e-06	0.000215939	4.4657	Inactive-Active
ENSG00000167280.17	ENGASE	1.02921	6.70775	7.20221	4.09559579769634e-06	0.000216155	4.34987	Inactive-Active
ENSG00000204054.14	LINC00963	-1.08749	4.33078	-7.20174	4.098630800219e-06	0.000216155	4.52482	Inactive-Active
ENSG00000111817.19	DSE	-1.30433	4.35476	-7.2011	4.10274277553697e-06	0.000216155	4.53458	Inactive-Active
ENSG00000174175.17	SELP	-4.05993	2.52651	-7.19393	4.14946902981055e-06	0.000217592	4.60485	Inactive-Active
ENSG00000228672.4	PROB1	1.17369	3.81669	7.19383	4.15010245851631e-06	0.000217592	4.52917	Inactive-Active
ENSG00000104972.15	LILRB1	-1.79937	2.92409	-7.19366	4.15120391926908e-06	0.000217592	4.60147	Inactive-Active
ENSG00000101825.8	MXRA5	-1.63136	6.34934	-7.18962	4.17781299153174e-06	0.000218615	4.39571	Inactive-Active
ENSG00000182963.11	GJC1	-2.61062	2.52834	-7.18489	4.20914611865248e-06	0.000219745	4.58523	Inactive-Active
ENSG00000168461.13	RAB31	-2.13855	5.47139	-7.18422	4.21365636522434e-06	0.000219745	4.42929	Inactive-Active
ENSG00000154127.10	UBASH3B	-1.3122	2.99094	-7.18083	4.23628574968986e-06	0.000220544	4.57922	Inactive-Active
ENSG00000005810.18	MYCBP2	-0.898673	5.61671	-7.17978	4.24329250556766e-06	0.000220544	4.40738	Inactive-Active
ENSG00000120875.9	DUSP4	-3.06388	2.91044	-7.17812	4.25449210289729e-06	0.000220754	4.58151	Inactive-Active
ENSG00000123685.9	BATF3	-2.15891	1.13087	-7.17613	4.26785973470621e-06	0.000221075	4.46628	Inactive-Active
ENSG00000115935.18	WIPF1	-1.62941	6.02546	-7.16461	4.34643996170104e-06	0.000224768	4.364	Inactive-Active
ENSG00000287263.1	AC008875.3	-1.82374	2.69675	-7.15742	4.39622424575011e-06	0.000226768	4.55035	Inactive-Active
ENSG00000114353.17	GNAI2	-1.47259	7.15629	-7.1569	4.3998358577304e-06	0.000226768	4.27201	Inactive-Active
ENSG00000090339.9	ICAM1	-2.64234	4.14041	-7.15287	4.42800054445881e-06	0.000227414	4.47796	Inactive-Active
ENSG00000148730.7	EIF4EBP2	0.756906	7.91637	7.15199	4.4342073067657e-06	0.000227414	4.19306	Inactive-Active
ENSG00000111046.4	MYF6	-4.10456	-3.83447	-7.15101	4.44109714678669e-06	0.000227414	2.81466	Inactive-Active
ENSG00000026751.17	SLAMF7	-1.34548	6.53131	-7.1509	4.44187683299082e-06	0.000227414	4.31384	Inactive-Active
ENSG00000106605.11	BLVRA	-1.44299	3.62086	-7.14977	4.44979058394084e-06	0.000227441	4.5095	Inactive-Active
ENSG00000169991.11	IFFO2	-0.906629	4.18946	-7.1485	4.45876345206284e-06	0.000227522	4.44865	Inactive-Active
ENSG00000108001.15	EBF3	-3.15788	0.0112746	-7.13999	4.5193776342946e-06	0.000230234	4.16804	Inactive-Active
ENSG00000135940.7	COX5B	1.01019	6.8604	7.13638	4.54537409549121e-06	0.000230889	4.21908	Inactive-Active
ENSG00000196923.14	PDLIM7	-2.12023	4.92199	-7.13568	4.55038105875794e-06	0.000230889	4.3979	Inactive-Active
ENSG00000143799.14	PARP1	-0.729917	6.75834	-7.13509	4.55469612830911e-06	0.000230889	4.25331	Inactive-Active
ENSG00000051009.11	FAM160A2	0.903009	6.63918	7.12877	4.60058128914728e-06	0.000232832	4.23129	Inactive-Active
ENSG00000163586.10	FABP1	2.24649	9.74111	7.12719	4.61218977749437e-06	0.000232995	4.05599	Inactive-Active
ENSG00000079739.17	PGM1	1.00954	6.13817	7.12627	4.61893363831724e-06	0.000232995	4.25288	Inactive-Active
ENSG00000076258.10	FMO4	1.54298	2.70572	7.12487	4.62923248181884e-06	0.000233133	4.48241	Inactive-Active
ENSG00000138755.6	CXCL9	-4.13404	3.57685	-7.11531	4.70009200903067e-06	0.000235727	4.45593	Inactive-Active
ENSG00000168060.16	NAALADL1	2.57495	3.77854	7.11402	4.7097297279233e-06	0.000235727	4.40033	Inactive-Active
ENSG00000077782.21	FGFR1	-1.73542	4.969	-7.11303	4.71713021574413e-06	0.000235727	4.36556	Inactive-Active
ENSG00000079335.20	CDC14A	1.41669	3.87184	7.11291	4.71806408376539e-06	0.000235727	4.38895	Inactive-Active
ENSG00000137648.19	TMPRSS4	1.09458	7.6457	7.11047	4.73636012986556e-06	0.000235727	4.12952	Inactive-Active
ENSG00000241360.2	PDXP	1.38729	2.09586	7.11014	4.73884900448605e-06	0.000235727	4.47845	Inactive-Active
ENSG00000008853.17	RHOBTB2	-1.62294	2.91008	-7.10997	4.74013547696757e-06	0.000235727	4.47479	Inactive-Active
ENSG00000196689.12	TRPV1	1.26935	2.90428	7.10974	4.74191074854929e-06	0.000235727	4.45587	Inactive-Active
ENSG00000147684.10	NDUFB9	0.854575	5.31687	7.10747	4.75902004154064e-06	0.000236196	4.27482	Inactive-Active
ENSG00000119630.14	PGF	-2.44408	2.24439	-7.10419	4.78395313340316e-06	0.000237052	4.4582	Inactive-Active
ENSG00000169271.3	HSPB3	5.43323	-2.91812	7.10263	4.79581460308714e-06	0.000237258	3.2459	Inactive-Active
ENSG00000142156.15	COL6A1	-1.9821	8.56043	-7.09895	4.82406187794104e-06	0.000238273	4.11501	Inactive-Active
ENSG00000130487.9	KLHDC7B	-2.56543	0.59944	-7.09385	4.86338216813403e-06	0.000239831	4.2911	Inactive-Active
ENSG00000005102.14	MEOX1	-2.95888	2.21359	-7.0895	4.89718881779563e-06	0.000241112	4.43322	Inactive-Active
ENSG00000125144.14	MT1G	4.01235	5.25298	7.08215	4.9548948529674e-06	0.000243564	4.22615	Inactive-Active
ENSG00000179772.8	FOXS1	-2.59377	-0.27779	-7.07613	5.00273106503879e-06	0.000245459	3.94331	Inactive-Active
ENSG00000185479.6	KRT6B	-6.57804	-2.60562	-7.0753	5.00936408190545e-06	0.000245459	3.24636	Inactive-Active
ENSG00000165434.8	PGM2L1	-1.06616	4.77504	-7.07361	5.02282505477554e-06	0.000245651	4.28062	Inactive-Active
ENSG00000087237.12	CETP	-2.39358	0.318515	-7.07192	5.03643653111757e-06	0.000245651	4.18157	Inactive-Active
ENSG00000165449.12	SLC16A9	2.28541	4.89119	7.07182	5.03719730908693e-06	0.000245651	4.24896	Inactive-Active
ENSG00000125652.8	ALKBH7	0.743267	5.41503	7.05916	5.14006525718138e-06	0.000250272	4.19273	Inactive-Active
ENSG00000115902.11	SLC1A4	-1.01929	5.50212	-7.05761	5.15278537259988e-06	0.000250303	4.21892	Inactive-Active
ENSG00000166869.3	CHP2	3.46095	6.53988	7.05711	5.15695191366344e-06	0.000250303	4.08577	Inactive-Active
ENSG00000058091.17	CDK14	-1.90973	3.1967	-7.05318	5.18941345704686e-06	0.000251483	4.38107	Inactive-Active
ENSG00000143772.9	ITPKB	-1.13593	4.60845	-7.04894	5.22473177740649e-06	0.000252554	4.27102	Inactive-Active
ENSG00000172037.14	LAMB2	-1.44118	6.22184	-7.04856	5.22790646052736e-06	0.000252554	4.16362	Inactive-Active
ENSG00000198535.5	C2CD4A	-3.82027	1.15146	-7.0465	5.24512055104397e-06	0.000252989	4.32076	Inactive-Active
ENSG00000139433.11	GLTP	0.781639	6.06467	7.03952	5.30405446049042e-06	0.000254901	4.11305	Inactive-Active
ENSG00000071537.14	SEL1L	-0.81295	7.86476	-7.03891	5.30919554818012e-06	0.000254901	4.02717	Inactive-Active
ENSG00000186340.17	THBS2	-5.33362	1.4659	-7.03887	5.30957955972497e-06	0.000254901	4.22551	Inactive-Active
ENSG00000068078.20	FGFR3	2.10011	5.1931	7.0346	5.34599841013247e-06	0.000255989	4.14883	Inactive-Active
ENSG00000123739.11	PLA2G12A	1.11105	4.96877	7.03346	5.35574941659426e-06	0.000255989	4.18616	Inactive-Active
ENSG00000090382.7	LYZ	-1.77392	8.14758	-7.03219	5.36658953842671e-06	0.000255989	4.0138	Inactive-Active
ENSG00000136872.20	ALDOB	-4.16714	4.38688	-7.03196	5.36859219536698e-06	0.000255989	4.28901	Inactive-Active
ENSG00000117385.16	P3H1	-1.66122	4.42549	-7.02988	5.38651536920175e-06	0.000255989	4.26579	Inactive-Active
ENSG00000065923.10	SLC9A7	-1.49615	2.80767	-7.0298	5.38716507918675e-06	0.000255989	4.35168	Inactive-Active
ENSG00000279249.3	AC007614.1	2.13908	0.246261	7.02943	5.39037275437723e-06	0.000255989	4.25063	Inactive-Active
ENSG00000177301.16	KCNA2	-1.78075	2.01566	-7.02481	5.43045673801418e-06	0.000257496	4.32499	Inactive-Active
ENSG00000178623.12	GPR35	1.00692	5.35865	7.02205	5.45454252624981e-06	0.00025824	4.14089	Inactive-Active
ENSG00000120658.13	ENOX1	-2.36257	0.315707	-7.01954	5.47646917079982e-06	0.000258881	4.11314	Inactive-Active
ENSG00000112414.15	ADGRG6	-1.64324	5.0814	-7.01697	5.49907932351586e-06	0.000259551	4.16914	Inactive-Active
ENSG00000101298.15	SNPH	-2.45908	2.95598	-7.01568	5.51048777457446e-06	0.000259662	4.32418	Inactive-Active
ENSG00000168209.6	DDIT4	-1.75984	5.5217	-7.01441	5.52169324287856e-06	0.000259662	4.14317	Inactive-Active
ENSG00000150977.11	RILPL2	-1.60872	3.42438	-7.01302	5.53402378555722e-06	0.000259662	4.3008	Inactive-Active
ENSG00000161395.14	PGAP3	1.08489	5.36106	7.0129	5.53511024614899e-06	0.000259662	4.11965	Inactive-Active
ENSG00000090861.17	AARS1	-0.71986	6.48826	-7.00964	5.56411464295068e-06	0.000260364	4.06168	Inactive-Active
ENSG00000041982.16	TNC	-3.51858	6.23997	-7.00932	5.56697593317386e-06	0.000260364	4.13885	Inactive-Active
ENSG00000070759.17	TESK2	1.14308	3.45736	7.00454	5.60979315460576e-06	0.000261969	4.24666	Inactive-Active
ENSG00000198938.2	MT-CO3	1.45084	13.1634	7.00153	5.63702743080807e-06	0.000262842	3.749	Inactive-Active
ENSG00000110777.12	POU2AF1	-2.00127	6.00069	-7.00019	5.64910697418702e-06	0.000263008	4.11068	Inactive-Active
ENSG00000136783.10	NIPSNAP3A	1.26104	5.0173	6.9973	5.6754400190285e-06	0.000263835	4.10827	Inactive-Active
ENSG00000169248.13	CXCL11	-5.37655	-0.0391955	-6.98729	5.76744010504532e-06	0.000267708	4.0696	Inactive-Active
ENSG00000213949.10	ITGA1	-1.14661	6.16834	-6.98582	5.78104567761398e-06	0.000267936	4.05392	Inactive-Active
ENSG00000155324.10	GRAMD2B	1.2694	4.88975	6.98413	5.79673932226638e-06	0.00026826	4.09631	Inactive-Active
ENSG00000281333.2	AC024941.2	3.05705	-0.732619	6.97872	5.84744708057685e-06	0.000270201	4.01232	Inactive-Active
ENSG00000233493.4	TMEM238	1.05271	4.58953	6.97758	5.85812262467007e-06	0.000270289	4.12036	Inactive-Active
ENSG00000108557.19	RAI1	-0.787614	4.83429	-6.97608	5.87231388501157e-06	0.000270539	4.12638	Inactive-Active
ENSG00000104823.9	ECH1	0.994695	6.04198	6.97449	5.88730257355569e-06	0.000270825	4.01383	Inactive-Active
ENSG00000173894.11	CBX2	-2.6093	0.791244	-6.97196	5.91137226427553e-06	0.000271171	4.14717	Inactive-Active
ENSG00000250479.9	CHCHD10	1.21682	6.12935	6.97101	5.92042847119231e-06	0.000271171	3.99108	Inactive-Active
ENSG00000196839.13	ADA	-2.08097	2.35267	-6.97092	5.92122290857853e-06	0.000271171	4.26384	Inactive-Active
ENSG00000153303.17	FRMD1	4.35198	4.17352	6.96955	5.93427550944055e-06	0.000271365	4.08292	Inactive-Active
ENSG00000112655.16	PTK7	-1.35267	5.26724	-6.96092	6.01731033960133e-06	0.00027455	4.09008	Inactive-Active
ENSG00000104059.4	FAM189A1	2.94111	0.352252	6.96047	6.02173658846965e-06	0.00027455	4.16837	Inactive-Active
ENSG00000116649.10	SRM	-1.21243	4.67026	-6.95881	6.0378153257212e-06	0.000274877	4.11936	Inactive-Active
ENSG00000135862.6	LAMC1	-1.38811	6.92323	-6.95709	6.05459490922356e-06	0.000275147	3.96737	Inactive-Active
ENSG00000102781.14	KATNAL1	-1.10223	2.7208	-6.95637	6.06161406750588e-06	0.000275147	4.2401	Inactive-Active
ENSG00000158859.10	ADAMTS4	-3.71192	1.7734	-6.95231	6.10140321437919e-06	0.000276546	4.20035	Inactive-Active
ENSG00000137501.17	SYTL2	1.38335	7.4762	6.94901	6.13392700466698e-06	0.000277413	3.87879	Inactive-Active
ENSG00000275832.5	ARHGAP23	-2.05717	2.59987	-6.94783	6.14567183530784e-06	0.000277413	4.22795	Inactive-Active
ENSG00000144837.9	PLA1A	-3.21166	0.694582	-6.94764	6.14752590086969e-06	0.000277413	4.09798	Inactive-Active
ENSG00000087303.18	NID2	-1.66956	3.77781	-6.94581	6.16566204972033e-06	0.000277523	4.1664	Inactive-Active
ENSG00000128311.14	TST	1.53921	7.27667	6.94558	6.16798896200589e-06	0.000277523	3.87391	Inactive-Active
ENSG00000111348.9	ARHGDIB	-1.81457	6.40645	-6.94324	6.19131060316581e-06	0.000277906	3.97163	Inactive-Active
ENSG00000223350.2	IGLV9-49	-3.16482	1.88566	-6.94292	6.19452036787568e-06	0.000277906	4.21433	Inactive-Active
ENSG00000253234.1	IGLV2-5	-2.35762	1.1593	-6.94154	6.20830784527206e-06	0.00027812	4.13216	Inactive-Active
ENSG00000186854.11	TRABD2A	2.06496	6.22521	6.93856	6.23817446104768e-06	0.000279034	3.93441	Inactive-Active
ENSG00000214796.8	TUBA5P	1.82326	1.38147	6.9377	6.24683503847727e-06	0.000279034	4.2072	Inactive-Active
ENSG00000066248.15	NGEF	1.4018	4.66469	6.93044	6.32049759572497e-06	0.000281916	4.02687	Inactive-Active
ENSG00000242247.11	ARFGAP3	-1.29334	5.87241	-6.9273	6.35261142007038e-06	0.000282939	3.9689	Inactive-Active
ENSG00000183048.12	SLC25A10	1.02813	3.09556	6.92622	6.36373585879984e-06	0.000283026	4.15022	Inactive-Active
ENSG00000214357.9	NEURL1B	1.21092	6.26576	6.92469	6.37946129740729e-06	0.000283124	3.91439	Inactive-Active
ENSG00000169826.8	CSGALNACT2	-1.55345	4.7744	-6.92311	6.39573175615605e-06	0.000283124	4.06429	Inactive-Active
ENSG00000180879.14	SSR4	-1.27948	7.36828	-6.92186	6.40875614013737e-06	0.000283124	3.86883	Inactive-Active
ENSG00000135472.9	FAIM2	-2.56071	1.09455	-6.9201	6.42699481394674e-06	0.000283124	4.10986	Inactive-Active
ENSG00000101224.18	CDC25B	-1.44707	5.48887	-6.91941	6.43410753863886e-06	0.000283124	3.99059	Inactive-Active
ENSG00000162512.16	SDC3	-1.115	5.74752	-6.9183	6.44566531943966e-06	0.000283124	3.97541	Inactive-Active
ENSG00000147036.12	LANCL3	1.63753	1.94518	6.91755	6.45347720344566e-06	0.000283124	4.18014	Inactive-Active
ENSG00000186827.11	TNFRSF4	-2.23655	2.35952	-6.91673	6.46203780875037e-06	0.000283124	4.17814	Inactive-Active
ENSG00000176720.6	BOK	-1.18903	3.89505	-6.91635	6.46603040244606e-06	0.000283124	4.10001	Inactive-Active
ENSG00000163565.19	IFI16	-1.43294	5.82886	-6.91589	6.4708095120731e-06	0.000283124	3.96937	Inactive-Active
ENSG00000163347.6	CLDN1	-2.4867	2.6369	-6.91548	6.47518634564992e-06	0.000283124	4.17782	Inactive-Active
ENSG00000076706.17	MCAM	-2.26483	5.35047	-6.91538	6.47619242440455e-06	0.000283124	4.01554	Inactive-Active
ENSG00000170088.14	TMEM192	0.869813	4.86025	6.9134	6.49694152261764e-06	0.000283623	4.00127	Inactive-Active
ENSG00000163295.5	ALPI	2.4237	3.22814	6.91254	6.50599547588601e-06	0.000283623	4.0944	Inactive-Active
ENSG00000169554.22	ZEB2	-1.06522	5.95586	-6.90612	6.57390415982192e-06	0.00028596	3.94481	Inactive-Active
ENSG00000071205.12	ARHGAP10	-1.3186	2.74295	-6.90572	6.57816976434434e-06	0.00028596	4.15809	Inactive-Active
ENSG00000124496.12	TRERF1	-0.993074	4.3513	-6.90319	6.60511106818225e-06	0.00028656	4.05701	Inactive-Active
ENSG00000280219.1	AC093908.1	-3.19454	-0.789945	-6.90243	6.61329842945834e-06	0.00028656	3.62033	Inactive-Active
ENSG00000177106.16	EPS8L2	1.18581	7.22323	6.90108	6.62771419150453e-06	0.00028656	3.81246	Inactive-Active
ENSG00000179776.19	CDH5	-2.16554	4.58375	-6.90022	6.63693857549374e-06	0.00028656	4.04836	Inactive-Active
ENSG00000168386.18	FILIP1L	-1.96747	5.18729	-6.8993	6.6468244888572e-06	0.00028656	3.99567	Inactive-Active
ENSG00000149256.16	TENM4	-2.51914	1.41703	-6.899	6.65009063350406e-06	0.00028656	4.09933	Inactive-Active
ENSG00000241839.10	PLEKHO2	-1.7463	4.61319	-6.89835	6.65704849115693e-06	0.00028656	4.02711	Inactive-Active
ENSG00000188042.8	ARL4C	-1.51596	4.63398	-6.88939	6.75435399278817e-06	0.000290309	4.0099	Inactive-Active
ENSG00000129474.16	AJUBA	-1.46199	2.3657	-6.88851	6.76399098353437e-06	0.000290309	4.13583	Inactive-Active
ENSG00000163599.17	CTLA4	-3.3583	1.24713	-6.88775	6.77240837754082e-06	0.000290309	4.04007	Inactive-Active
ENSG00000156869.14	FRRS1	1.24002	4.09419	6.88474	6.80549029405062e-06	0.000291034	4.015	Inactive-Active
ENSG00000137936.18	BCAR3	0.739985	4.87436	6.8845	6.80819469217068e-06	0.000291034	3.94361	Inactive-Active
ENSG00000187824.9	TMEM220	1.80937	3.63603	6.88022	6.85556829858782e-06	0.000292653	4.03764	Inactive-Active
ENSG00000102554.14	KLF5	1.52367	8.48699	6.87876	6.87178859961619e-06	0.000292842	3.70336	Inactive-Active
ENSG00000093167.18	LRRFIP2	0.673562	6.41099	6.87811	6.87898819157085e-06	0.000292842	3.82825	Inactive-Active
ENSG00000184307.16	ZDHHC23	1.62258	5.21086	6.87595	6.90321743898551e-06	0.000293468	3.8987	Inactive-Active
ENSG00000206432.4	TMEM200C	-3.50107	0.499891	-6.87492	6.91473407373441e-06	0.000293552	3.89427	Inactive-Active
ENSG00000141756.19	FKBP10	-1.8549	5.25687	-6.87336	6.93227712492212e-06	0.000293622	3.95578	Inactive-Active
ENSG00000124772.12	CPNE5	-1.69224	4.79718	-6.87308	6.9354185389438e-06	0.000293622	3.9745	Inactive-Active
ENSG00000106348.18	IMPDH1	-1.05741	5.14083	-6.86987	6.97162323504094e-06	0.00029475	3.93321	Inactive-Active
ENSG00000110887.8	DAO	3.57242	-0.771046	6.86691	7.0052206621295e-06	0.000295764	3.9085	Inactive-Active
ENSG00000159618.16	ADGRG5	-1.53374	3.08284	-6.85991	7.08527975095648e-06	0.000298012	4.0756	Inactive-Active
ENSG00000101470.10	TNNC2	2.97522	0.302861	6.85931	7.092142765678e-06	0.000298012	4.03552	Inactive-Active
ENSG00000166183.16	ASPG	3.60196	2.49945	6.8588	7.09808645157268e-06	0.000298012	4.06609	Inactive-Active
ENSG00000088256.9	GNA11	1.19753	7.42093	6.85819	7.10503973308694e-06	0.000298012	3.7253	Inactive-Active
ENSG00000214135.8	AC132008.2	1.10146	5.10654	6.85755	7.11242651598502e-06	0.000298012	3.8954	Inactive-Active
ENSG00000166025.18	AMOTL1	-1.74955	3.82479	-6.8572	7.11646644123673e-06	0.000298012	4.03574	Inactive-Active
ENSG00000211659.2	IGLV3-25	-2.27512	7.70291	-6.8538	7.15596835490249e-06	0.000299191	3.77162	Inactive-Active
ENSG00000240024.5	LINC00888	-1.60162	1.54766	-6.8531	7.16403465993143e-06	0.000299191	4.0625	Inactive-Active
ENSG00000162654.9	GBP4	-1.51472	5.23566	-6.84994	7.20098417080478e-06	0.000300327	3.8968	Inactive-Active
ENSG00000074410.14	CA12	1.54568	8.22894	6.84844	7.21853422498154e-06	0.000300365	3.66077	Inactive-Active
ENSG00000131143.10	COX4I1	0.794891	8.15622	6.8482	7.22138558573077e-06	0.000300365	3.67376	Inactive-Active
ENSG00000010810.17	FYN	-1.64259	5.09959	-6.84692	7.23643363395611e-06	0.000300585	3.91942	Inactive-Active
ENSG00000112299.8	VNN1	-4.29378	3.63017	-6.84374	7.27394933831781e-06	0.00030061	4.02563	Inactive-Active
ENSG00000010278.15	CD9	0.885473	8.4269	6.84327	7.2794512054133e-06	0.00030061	3.65083	Inactive-Active
ENSG00000172935.9	MRGPRF	-2.48073	2.63883	-6.84324	7.27981624178687e-06	0.00030061	4.06461	Inactive-Active
ENSG00000285128.1	AC092306.1	1.96685	1.3225	6.84296	7.28320889150512e-06	0.00030061	4.05407	Inactive-Active
ENSG00000258708.1	SLC25A21-AS1	1.92346	-0.198711	6.84274	7.28579835751304e-06	0.00030061	3.87456	Inactive-Active
ENSG00000172115.9	CYCS	1.03457	8.20648	6.84036	7.31401119219219e-06	0.000301371	3.65665	Inactive-Active
ENSG00000113621.15	TXNDC15	-0.984675	5.56906	-6.83862	7.33473019372602e-06	0.000301821	3.85243	Inactive-Active
ENSG00000088836.14	SLC4A11	-2.80043	0.989902	-6.83542	7.37303999476452e-06	0.00030258	3.95173	Inactive-Active
ENSG00000164919.11	COX6C	0.942386	5.56454	6.83536	7.37382713785452e-06	0.00030258	3.8148	Inactive-Active
ENSG00000196843.17	ARID5A	-1.73955	4.12889	-6.83452	7.38384479331088e-06	0.00030258	3.96619	Inactive-Active
ENSG00000134109.11	EDEM1	-0.887044	6.67164	-6.83381	7.39244362307202e-06	0.00030258	3.76231	Inactive-Active
ENSG00000126432.14	PRDX5	0.64889	7.93371	6.82349	7.51769526184833e-06	0.000307108	3.64794	Inactive-Active
ENSG00000156127.8	BATF	-2.73108	1.69581	-6.82306	7.52299293707152e-06	0.000307108	4.01394	Inactive-Active
ENSG00000198832.10	SELENOM	-1.79367	4.67189	-6.8221	7.53477425748663e-06	0.000307182	3.90473	Inactive-Active
ENSG00000123143.13	PKN1	-1.16253	5.78631	-6.82036	7.55610740454567e-06	0.000307644	3.80805	Inactive-Active
ENSG00000073712.15	FERMT2	-1.44496	4.64856	-6.81934	7.56862679727995e-06	0.000307748	3.9056	Inactive-Active
ENSG00000166073.11	GPR176	-2.91247	2.45078	-6.81624	7.60706448683653e-06	0.000308693	4.02003	Inactive-Active
ENSG00000089356.18	FXYD3	2.1982	4.42876	6.81585	7.61189907868902e-06	0.000308693	3.85091	Inactive-Active
ENSG00000162813.18	BPNT1	0.894515	6.07095	6.81402	7.63459372018571e-06	0.000308694	3.74714	Inactive-Active
ENSG00000167460.17	TPM4	-1.07521	8.67618	-6.81391	7.63602242936595e-06	0.000308694	3.60448	Inactive-Active
ENSG00000277938.1	AL035252.3	1.90406	1.57637	6.81343	7.64198997356527e-06	0.000308694	4.01784	Inactive-Active
ENSG00000114450.11	GNB4	-1.12352	4.24708	-6.81028	7.68130146722731e-06	0.000309876	3.91547	Inactive-Active
ENSG00000172638.13	EFEMP2	-1.60025	4.40096	-6.80782	7.71223415280261e-06	0.000310717	3.91034	Inactive-Active
ENSG00000162069.16	BICDL2	1.40026	6.584	6.80694	7.72330722587507e-06	0.000310757	3.69365	Inactive-Active
ENSG00000027075.15	PRKCH	-1.35689	4.24797	-6.80597	7.73543748785742e-06	0.00031084	3.90701	Inactive-Active
ENSG00000105376.5	ICAM5	-2.00722	0.377379	-6.79742	7.84421222521113e-06	0.0003148	3.82029	Inactive-Active
ENSG00000024422.12	EHD2	-1.94999	5.42667	-6.79547	7.86918816412629e-06	0.000314939	3.80633	Inactive-Active
ENSG00000146535.14	GNA12	-0.93566	5.51274	-6.79537	7.87054122716275e-06	0.000314939	3.77964	Inactive-Active
ENSG00000118707.11	TGIF2	-1.27794	3.25071	-6.79476	7.87833188765327e-06	0.000314939	3.96659	Inactive-Active
ENSG00000148848.14	ADAM12	-3.60221	1.84477	-6.79381	7.89052541134043e-06	0.000315018	3.96301	Inactive-Active
ENSG00000211904.2	IGHJ2	-3.58941	-1.28591	-6.78808	7.96476755290599e-06	0.000317207	3.37137	Inactive-Active
ENSG00000173068.18	BNC2	-1.73874	3.25844	-6.78799	7.965934988046e-06	0.000317207	3.96363	Inactive-Active
ENSG00000123342.16	MMP19	-2.02515	3.43974	-6.78633	7.98756913303469e-06	0.00031737	3.95219	Inactive-Active
ENSG00000131781.13	FMO5	1.33206	5.60705	6.7861	7.99063507375138e-06	0.00031737	3.7204	Inactive-Active
ENSG00000070882.13	OSBPL3	-1.12727	5.09616	-6.78089	8.05888309610237e-06	0.000319615	3.80501	Inactive-Active
ENSG00000239887.6	C1orf226	1.31081	4.14577	6.77896	8.0843680141212e-06	0.000319615	3.81791	Inactive-Active
ENSG00000211655.3	IGLV1-36	-3.85455	3.69585	-6.7782	8.09446189069314e-06	0.000319615	3.93934	Inactive-Active
ENSG00000107537.14	PHYH	1.04871	5.09352	6.77805	8.09648161972628e-06	0.000319615	3.74524	Inactive-Active
ENSG00000100983.12	GSS	0.748039	5.99958	6.77741	8.10483661321952e-06	0.000319615	3.69096	Inactive-Active
ENSG00000123843.13	C4BPB	-3.22503	2.59155	-6.77707	8.10938354966071e-06	0.000319615	3.95388	Inactive-Active
ENSG00000140577.16	CRTC3	-0.780398	5.09772	-6.77586	8.12540975649924e-06	0.000319795	3.78078	Inactive-Active
ENSG00000163536.13	SERPINI1	-2.12877	1.93989	-6.77517	8.13469445680795e-06	0.000319795	3.9485	Inactive-Active
ENSG00000287750.1	AL353572.4	2.37175	0.718763	6.77341	8.15808990193409e-06	0.000320073	3.92646	Inactive-Active
ENSG00000234771.3	SLC25A25-AS1	1.528	5.83498	6.77292	8.16469143881079e-06	0.000320073	3.68412	Inactive-Active
ENSG00000127124.16	HIVEP3	-1.30117	3.18367	-6.7723	8.17290915549353e-06	0.000320073	3.9245	Inactive-Active
ENSG00000133742.14	CA1	4.37072	8.25959	6.76978	8.20673105342083e-06	0.000320989	3.51932	Inactive-Active
ENSG00000130517.14	PGPEP1	0.687822	6.32116	6.76861	8.22247621003553e-06	0.000321198	3.6553	Inactive-Active
ENSG00000152078.10	TLCD4	1.85767	5.34371	6.76639	8.2523094540545e-06	0.000321955	3.69125	Inactive-Active
ENSG00000101842.14	VSIG1	-6.19251	-0.235781	-6.76512	8.26946905155397e-06	0.000322217	3.63208	Inactive-Active
ENSG00000185567.7	AHNAK2	-2.26879	3.32937	-6.76373	8.28831068701105e-06	0.000322543	3.924	Inactive-Active
ENSG00000211677.2	IGLC2	-2.41318	10.6227	-6.76162	8.31711004791769e-06	0.000323256	3.45983	Inactive-Active
ENSG00000095370.20	SH2D3C	-1.83176	3.6689	-6.75758	8.37221421535882e-06	0.000324673	3.89028	Inactive-Active
ENSG00000172340.15	SUCLG2	1.25059	7.75365	6.75741	8.37464372068443e-06	0.000324673	3.53428	Inactive-Active
ENSG00000198873.12	GRK5	-1.47866	5.09961	-6.75436	8.41654395705442e-06	0.000325887	3.75752	Inactive-Active
ENSG00000100097.12	LGALS1	-1.72354	6.77713	-6.74959	8.48262916222821e-06	0.000327839	3.63004	Inactive-Active
ENSG00000112679.14	DUSP22	-0.79126	5.31252	-6.74919	8.4882199868046e-06	0.000327839	3.71676	Inactive-Active
ENSG00000101347.10	SAMHD1	-0.829787	6.50448	-6.74615	8.53054644792693e-06	0.000328669	3.62724	Inactive-Active
ENSG00000249992.2	TMEM158	-3.24091	2.46078	-6.74612	8.53104562006691e-06	0.000328669	3.91282	Inactive-Active
ENSG00000153029.15	MR1	-0.966762	4.37531	-6.74176	8.59225269110297e-06	0.000330614	3.79315	Inactive-Active
ENSG00000150540.14	HNMT	0.865238	5.71074	6.73924	8.62772565875672e-06	0.000331565	3.64797	Inactive-Active
ENSG00000142227.11	EMP3	-1.65081	4.33212	-6.736	8.67374785833763e-06	0.000332919	3.79482	Inactive-Active
ENSG00000146112.12	PPP1R18	-2.10713	2.6224	-6.73359	8.70818565334839e-06	0.000333825	3.88866	Inactive-Active
ENSG00000005059.16	MCUB	-0.988963	3.77204	-6.73226	8.7271802429562e-06	0.000334137	3.81716	Inactive-Active
ENSG00000165886.5	UBTD1	-2.46533	1.54485	-6.73105	8.74450157607161e-06	0.000334385	3.86425	Inactive-Active
ENSG00000260173.1	AC020779.2	5.07395	-2.7095	6.72904	8.77342482175501e-06	0.000335075	3.24073	Inactive-Active
ENSG00000185361.9	TNFAIP8L1	-0.916316	4.32574	-6.72772	8.79249647646524e-06	0.000335388	3.75197	Inactive-Active
ENSG00000134817.11	APLNR	-2.07096	5.0989	-6.72274	8.86464712382501e-06	0.000337722	3.72326	Inactive-Active
ENSG00000065882.16	TBC1D1	-0.789786	5.85135	-6.72158	8.88160645938062e-06	0.000337951	3.62045	Inactive-Active
ENSG00000131370.16	SH3BP5	-1.73675	2.49506	-6.71669	8.95328712801494e-06	0.000340258	3.86631	Inactive-Active
ENSG00000173821.19	RNF213	-0.858357	7.66643	-6.71359	8.99898479466149e-06	0.000341574	3.49039	Inactive-Active
ENSG00000152784.16	PRDM8	-1.74553	1.99327	-6.71201	9.02233365168127e-06	0.000342039	3.85512	Inactive-Active
ENSG00000018408.15	WWTR1	-1.44953	4.75486	-6.71011	9.05066021707309e-06	0.000342691	3.71776	Inactive-Active
ENSG00000106077.18	ABHD11	1.0596	5.67265	6.7088	9.0700948270294e-06	0.000343005	3.59846	Inactive-Active
ENSG00000137507.11	LRRC32	-1.49242	4.45772	-6.70668	9.10186861387036e-06	0.000343785	3.74171	Inactive-Active
ENSG00000129675.16	ARHGEF6	-1.21846	4.99268	-6.70525	9.12321864145362e-06	0.00034417	3.682	Inactive-Active
ENSG00000160746.13	ANO10	0.812099	5.58153	6.70423	9.1386096776879e-06	0.000344329	3.59078	Inactive-Active
ENSG00000142173.16	COL6A2	-1.71929	8.92181	-6.70159	9.17837213053224e-06	0.000344748	3.42764	Inactive-Active
ENSG00000047597.7	XK	1.46976	5.37271	6.70133	9.18234577585872e-06	0.000344748	3.59385	Inactive-Active
ENSG00000279756.1	AC012317.2	3.4039	2.06516	6.70126	9.18329784032336e-06	0.000344748	3.82157	Inactive-Active
ENSG00000106683.15	LIMK1	-1.18403	4.90413	-6.70042	9.19597398362639e-06	0.000344804	3.6749	Inactive-Active
ENSG00000221275.1	MIR548I2	3.73336	-4.26825	6.69841	9.22652272530614e-06	0.000345529	2.56735	Inactive-Active
ENSG00000174007.9	CEP19	-2.23608	1.11819	-6.69607	9.2621101091019e-06	0.000346441	3.78953	Inactive-Active
ENSG00000114023.15	FAM162A	1.3172	6.10613	6.69429	9.28934524943713e-06	0.000347039	3.52755	Inactive-Active
ENSG00000066629.18	EML1	-1.81869	3.80256	-6.69296	9.30964724463975e-06	0.000347376	3.76626	Inactive-Active
ENSG00000100342.21	APOL1	-2.41617	6.52651	-6.69144	9.33300297494755e-06	0.000347826	3.53489	Inactive-Active
ENSG00000250067.12	YJEFN3	1.29395	3.05699	6.68971	9.35958234516539e-06	0.000348303	3.76599	Inactive-Active
ENSG00000111666.11	CHPT1	1.30846	5.72172	6.68914	9.36839768581481e-06	0.000348303	3.55968	Inactive-Active
ENSG00000166582.10	CENPV	1.36329	4.28653	6.68597	9.417444488593e-06	0.000349705	3.66082	Inactive-Active
ENSG00000136010.14	ALDH1L2	-1.50297	3.91996	-6.685	9.43249513676098e-06	0.000349842	3.76055	Inactive-Active
ENSG00000110042.8	DTX4	0.886211	6.81404	6.68241	9.47288421044314e-06	0.000350918	3.47606	Inactive-Active
ENSG00000136859.10	ANGPTL2	-2.65008	5.00314	-6.68146	9.48769341717024e-06	0.000351022	3.67148	Inactive-Active
ENSG00000239713.9	APOBEC3G	-1.47808	3.76663	-6.67952	9.51817138008276e-06	0.000351022	3.74184	Inactive-Active
ENSG00000134240.12	HMGCS2	4.8176	7.10493	6.67943	9.51949770925623e-06	0.000351022	3.42583	Inactive-Active
ENSG00000187097.13	ENTPD5	2.22255	7.10696	6.67932	9.52123932944335e-06	0.000351022	3.43201	Inactive-Active
ENSG00000181191.12	PJA1	-0.879543	3.87847	-6.67637	9.56770898617534e-06	0.000352313	3.71882	Inactive-Active
ENSG00000169432.18	SCN9A	2.15044	3.59413	6.67437	9.59929750645123e-06	0.000353055	3.68841	Inactive-Active
ENSG00000105329.11	TGFB1	-1.52758	5.42908	-6.67117	9.6501296910425e-06	0.000354501	3.5914	Inactive-Active
ENSG00000138795.10	LEF1	-2.00253	2.8298	-6.67019	9.66569296466929e-06	0.00035465	3.78887	Inactive-Active
ENSG00000170703.15	TTLL6	2.05187	3.41582	6.66796	9.70141696073851e-06	0.000355538	3.684	Inactive-Active
ENSG00000225385.3	AL353572.1	3.11841	-1.32248	6.66594	9.73380414799601e-06	0.000356301	3.45071	Inactive-Active
ENSG00000112902.12	SEMA5A	0.905936	5.92438	6.66176	9.80111905937677e-06	0.000357537	3.50405	Inactive-Active
ENSG00000091436.17	MAP3K20	-1.70642	5.10951	-6.66174	9.80149398977076e-06	0.000357537	3.5965	Inactive-Active
ENSG00000261963.3	CCDC92B	3.93808	-3.6578	6.66169	9.80237180700866e-06	0.000357537	2.65973	Inactive-Active
ENSG00000130775.16	THEMIS2	-1.92765	4.78269	-6.66081	9.81654244611667e-06	0.000357631	3.6274	Inactive-Active
ENSG00000123989.14	CHPF	-1.45204	5.72312	-6.65541	9.9044555787521e-06	0.000359965	3.53028	Inactive-Active
ENSG00000139209.16	SLC38A4	4.83378	1.456	6.65481	9.91427060843932e-06	0.000359965	3.76778	Inactive-Active
ENSG00000115919.15	KYNU	-3.54323	2.40636	-6.65463	9.91726464945602e-06	0.000359965	3.76678	Inactive-Active
ENSG00000116793.16	PHTF1	-1.12739	3.70603	-6.65349	9.93597053638005e-06	0.000359965	3.68781	Inactive-Active
ENSG00000185338.6	SOCS1	-2.56156	2.93467	-6.6533	9.93901686110984e-06	0.000359965	3.74619	Inactive-Active
ENSG00000114859.16	CLCN2	1.73072	5.0599	6.65255	9.95132762362772e-06	0.000359988	3.52895	Inactive-Active
ENSG00000076662.10	ICAM3	-2.09942	1.93199	-6.64826	1.00222530464035e-05	0.000362129	3.75141	Inactive-Active
ENSG00000127995.17	CASD1	0.992673	5.67796	6.64603	1.00591509250968e-05	0.000363036	3.48982	Inactive-Active
ENSG00000131389.17	SLC6A6	-2.10189	4.91051	-6.6435	1.01014336162281e-05	0.000364136	3.59218	Inactive-Active
ENSG00000059573.9	ALDH18A1	0.957104	7.25337	6.63945	1.01693150921874e-05	0.000365495	3.37749	Inactive-Active
ENSG00000143248.13	RGS5	-2.6809	6.98807	-6.63892	1.01780944672251e-05	0.000365495	3.44282	Inactive-Active
ENSG00000101365.21	IDH3B	0.682504	6.00417	6.63791	1.01952030541422e-05	0.000365495	3.45752	Inactive-Active
ENSG00000122786.20	CALD1	-1.63703	7.52544	-6.63767	1.01991885407523e-05	0.000365495	3.39479	Inactive-Active
ENSG00000139329.5	LUM	-2.21463	8.1292	-6.63746	1.02028072820948e-05	0.000365495	3.37715	Inactive-Active
ENSG00000108622.11	ICAM2	-1.60077	2.51683	-6.63702	1.02102736492632e-05	0.000365495	3.73819	Inactive-Active
ENSG00000167208.15	SNX20	-2.36583	2.75297	-6.63533	1.02387413782304e-05	0.000366088	3.72413	Inactive-Active
ENSG00000103528.17	SYT17	1.67014	1.85183	6.63406	1.02603741470211e-05	0.000366437	3.73575	Inactive-Active
ENSG00000070778.13	PTPN21	0.808733	5.20639	6.62892	1.03480873354586e-05	0.000369134	3.49346	Inactive-Active
ENSG00000198840.2	MT-ND3	1.33316	10.4691	6.62823	1.0359861990154e-05	0.000369134	3.19971	Inactive-Active
ENSG00000161642.18	ZNF385A	-1.11635	3.59458	-6.62585	1.04007092049863e-05	0.000370162	3.65603	Inactive-Active
ENSG00000243064.8	ABCC13	1.5892	3.30839	6.62415	1.04300042872698e-05	0.000370776	3.63973	Inactive-Active
ENSG00000178882.15	RFLNA	2.16192	5.00712	6.62206	1.04662938006291e-05	0.000371638	3.47732	Inactive-Active
ENSG00000068650.18	ATP11A	-1.01389	4.9892	-6.621	1.04846596557468e-05	0.000371862	3.54401	Inactive-Active
ENSG00000120254.16	MTHFD1L	-1.07286	3.2236	-6.61895	1.05202329389591e-05	0.000372694	3.67098	Inactive-Active
ENSG00000149948.14	HMGA2	1.63697	3.13154	6.61758	1.05441572292842e-05	0.000373113	3.65	Inactive-Active
ENSG00000140931.20	CMTM3	-1.21121	3.98818	-6.61625	1.05674524999279e-05	0.00037312	3.62029	Inactive-Active
ENSG00000136295.15	TTYH3	-1.24726	6.55301	-6.61619	1.05685659659293e-05	0.00037312	3.4128	Inactive-Active
ENSG00000161682.15	FAM171A2	-2.53255	-1.07981	-6.6137	1.06121622894779e-05	0.0003738	3.27932	Inactive-Active
ENSG00000143702.16	CEP170	-1.29681	2.27373	-6.61329	1.06194268464222e-05	0.0003738	3.70269	Inactive-Active
ENSG00000188677.15	PARVB	-1.49557	3.41176	-6.61236	1.06358664319889e-05	0.0003738	3.65911	Inactive-Active
ENSG00000111802.14	TDP2	1.48395	7.78714	6.61233	1.06363381321228e-05	0.0003738	3.28456	Inactive-Active
ENSG00000115355.17	CCDC88A	-1.36475	5.46985	-6.6111	1.06581437311023e-05	0.00037414	3.49746	Inactive-Active
ENSG00000165424.7	ZCCHC24	-1.38425	4.72815	-6.61012	1.06753897444368e-05	0.000374319	3.55301	Inactive-Active
ENSG00000124067.17	SLC12A4	-1.35564	4.87326	-6.6087	1.07005365117421e-05	0.000374774	3.5369	Inactive-Active
ENSG00000259834.1	AL365361.1	-1.53832	4.24925	-6.60666	1.07367881080379e-05	0.000375617	3.59632	Inactive-Active
ENSG00000225335.3	AC016027.1	1.67307	1.61808	6.60402	1.07840144949068e-05	0.000376841	3.68301	Inactive-Active
ENSG00000079432.8	CIC	-0.685768	5.99252	-6.59897	1.08747133031312e-05	0.00037899	3.41044	Inactive-Active
ENSG00000286510.1	AC018695.8	3.08395	-4.8517	6.59859	1.08815888278905e-05	0.00037899	2.30864	Inactive-Active
ENSG00000079308.19	TNS1	-1.78082	5.9084	-6.59854	1.08823921147979e-05	0.00037899	3.43638	Inactive-Active
ENSG00000211640.4	IGLV6-57	-2.71132	4.93841	-6.59693	1.09115058653598e-05	0.000379575	3.51714	Inactive-Active
ENSG00000168528.12	SERINC2	1.0313	7.70947	6.595	1.09466754326328e-05	0.000380369	3.26443	Inactive-Active
ENSG00000127603.30	MACF1	-0.781877	7.45807	-6.5924	1.09940095661468e-05	0.000381584	3.30429	Inactive-Active
ENSG00000129038.16	LOXL1	-2.25634	3.26966	-6.59149	1.10105583135282e-05	0.000381728	3.6528	Inactive-Active
ENSG00000223573.7	TINCR	3.33357	1.32587	6.58896	1.10569431580474e-05	0.000382906	3.66131	Inactive-Active
ENSG00000104447.13	TRPS1	-1.47833	3.21493	-6.58755	1.10828373589045e-05	0.000383372	3.63851	Inactive-Active
ENSG00000177469.13	CAVIN1	-2.15537	6.36263	-6.58541	1.11224153694006e-05	0.000384309	3.38731	Inactive-Active
ENSG00000154856.13	APCDD1	-1.40763	4.52786	-6.58443	1.11404869553832e-05	0.000384382	3.53263	Inactive-Active
ENSG00000102890.16	ELMO3	1.08997	5.57191	6.58394	1.11494717652183e-05	0.000384382	3.38658	Inactive-Active
ENSG00000150667.8	FSIP1	2.32291	0.0981278	6.5826	1.11743557474772e-05	0.00038481	3.5992	Inactive-Active
ENSG00000162664.17	ZNF326	0.833318	5.80762	6.57854	1.12501030842002e-05	0.000386986	3.37094	Inactive-Active
ENSG00000151702.17	FLI1	-1.47395	4.75635	-6.57782	1.12634882316691e-05	0.000387014	3.49087	Inactive-Active
ENSG00000215845.11	TSTD1	0.955223	4.18845	6.57688	1.12811782516743e-05	0.000387191	3.48935	Inactive-Active
ENSG00000134339.9	SAA2	-6.48677	-1.003	-6.57595	1.12986115834274e-05	0.000387358	3.15806	Inactive-Active
ENSG00000063176.16	SPHK2	0.865162	4.68224	6.57339	1.13467687369534e-05	0.000388576	3.45098	Inactive-Active
ENSG00000174705.13	SH3PXD2B	-1.62813	4.81641	-6.57187	1.13755096278738e-05	0.000389128	3.47477	Inactive-Active
ENSG00000171747.9	LGALS4	1.70858	10.7103	6.57114	1.13893662659201e-05	0.00038917	3.08673	Inactive-Active
ENSG00000148082.10	SHC3	-3.46786	0.920103	-6.56596	1.14878928670293e-05	0.000392102	3.50876	Inactive-Active
ENSG00000149557.14	FEZ1	-1.45928	2.48051	-6.55761	1.16486317588013e-05	0.000396788	3.61029	Inactive-Active
ENSG00000176472.10	ZNF575	1.79283	2.89308	6.5575	1.16509383676238e-05	0.000396788	3.56344	Inactive-Active
ENSG00000211653.2	IGLV1-40	-2.51113	7.79226	-6.55571	1.16856844280706e-05	0.00039712	3.24727	Inactive-Active
ENSG00000119632.4	IFI27L2	-1.23202	3.54803	-6.55567	1.16864436176444e-05	0.00039712	3.53645	Inactive-Active
ENSG00000135503.13	ACVR1B	1.04003	6.52485	6.555	1.16994012653168e-05	0.000397123	3.26734	Inactive-Active
ENSG00000138744.16	NAAA	1.38885	6.07553	6.55241	1.17501163743766e-05	0.000398405	3.29835	Inactive-Active
ENSG00000186198.4	SLC51B	2.1894	4.25619	6.54989	1.1799513952281e-05	0.00039964	3.40167	Inactive-Active
ENSG00000131368.8	MRPS25	0.940095	5.6125	6.54425	1.19109922588896e-05	0.000402955	3.33182	Inactive-Active
ENSG00000161638.11	ITGA5	-2.38681	5.21006	-6.54354	1.19249902850824e-05	0.000402955	3.40806	Inactive-Active
ENSG00000166822.13	TMEM170A	1.03728	5.73385	6.54296	1.19366042477073e-05	0.000402955	3.31066	Inactive-Active
ENSG00000140105.18	WARS1	-1.49818	6.90669	-6.54149	1.1965944767541e-05	0.000403504	3.25355	Inactive-Active
ENSG00000120885.22	CLU	-2.66084	5.81909	-6.53538	1.20885156998943e-05	0.000407191	3.34518	Inactive-Active
ENSG00000186318.17	BACE1	-1.04919	3.74086	-6.53339	1.21285887037108e-05	0.000407809	3.48495	Inactive-Active
ENSG00000177272.9	KCNA3	-1.48939	2.51075	-6.53316	1.21333050853967e-05	0.000407809	3.57381	Inactive-Active
ENSG00000160161.9	CILP2	-4.33946	-2.94086	-6.53206	1.21555211968664e-05	0.00040811	2.47787	Inactive-Active
ENSG00000165795.23	NDRG2	1.39993	6.67928	6.52992	1.21991160271555e-05	0.000409128	3.22004	Inactive-Active
ENSG00000182648.13	LINC01006	1.0654	3.05268	6.52713	1.22560307538406e-05	0.000410433	3.50677	Inactive-Active
ENSG00000197933.13	ZNF823	0.882302	3.5143	6.52639	1.22712612149364e-05	0.000410433	3.45584	Inactive-Active
ENSG00000174899.12	SLC66A1L	-2.61738	-1.13376	-6.52606	1.2277974892912e-05	0.000410433	3.05692	Inactive-Active
ENSG00000112531.17	QKI	-1.18505	5.7574	-6.52133	1.23752230407523e-05	0.000413236	3.31215	Inactive-Active
ENSG00000172575.12	RASGRP1	-1.53295	2.90405	-6.52022	1.23983245636663e-05	0.000413559	3.53789	Inactive-Active
ENSG00000279110.1	AL022323.3	2.08672	1.2789	6.51624	1.24810014321958e-05	0.000415867	3.54487	Inactive-Active
ENSG00000011028.14	MRC2	-1.77952	5.6281	-6.50977	1.26166661015008e-05	0.000419933	3.321	Inactive-Active
ENSG00000148200.17	NR6A1	1.48968	3.14389	6.50529	1.27114491800067e-05	0.000422632	3.46767	Inactive-Active
ENSG00000196196.3	HRCT1	2.49974	4.1978	6.50341	1.275152842971e-05	0.00042312	3.33352	Inactive-Active
ENSG00000171813.14	PWWP2B	0.861613	5.35995	6.50271	1.27665465101612e-05	0.00042312	3.26336	Inactive-Active
ENSG00000211952.3	IGHV4-28	-1.89227	2.39127	-6.50267	1.27673171925169e-05	0.00042312	3.52625	Inactive-Active
ENSG00000145050.19	MANF	-0.992998	6.29158	-6.50116	1.27997377532754e-05	0.000423739	3.21977	Inactive-Active
ENSG00000133104.14	SPART	-1.13103	4.19756	-6.49828	1.28615572565705e-05	0.000425161	3.40735	Inactive-Active
ENSG00000148187.18	MRRF	0.786137	5.10183	6.49787	1.2870304817559e-05	0.000425161	3.28788	Inactive-Active
ENSG00000157554.19	ERG	-1.90845	3.3335	-6.49404	1.29531786818216e-05	0.000426955	3.46792	Inactive-Active
ENSG00000196821.10	ILRUN	-0.665269	6.58983	-6.49319	1.29715254138561e-05	0.000426955	3.17709	Inactive-Active
ENSG00000259459.6	LINC02568	2.72537	1.8297	6.49306	1.29743092991489e-05	0.000426955	3.50554	Inactive-Active
ENSG00000121989.15	ACVR2A	0.858954	4.19015	6.4928	1.29800174009515e-05	0.000426955	3.35039	Inactive-Active
ENSG00000143641.10	GALNT2	-1.0533	6.38494	-6.4901	1.30387718451652e-05	0.000428431	3.18939	Inactive-Active
ENSG00000185101.13	ANO9	1.08586	6.9135	6.48815	1.30814178787099e-05	0.000429374	3.14115	Inactive-Active
ENSG00000164691.18	TAGAP	-2.06649	3.57232	-6.48516	1.31471706189587e-05	0.000431073	3.44008	Inactive-Active
ENSG00000100258.18	LMF2	-0.644138	6.11536	-6.48236	1.32089264040236e-05	0.000432079	3.20116	Inactive-Active
ENSG00000171956.7	FOXB1	-3.42854	-4.29365	-6.48192	1.32186330254864e-05	0.000432079	2.13219	Inactive-Active
ENSG00000225377.6	NRSN2-AS1	1.5563	3.1286	6.48152	1.32275771739132e-05	0.000432079	3.41419	Inactive-Active
ENSG00000170439.7	METTL7B	1.30428	3.75638	6.48123	1.32339212835026e-05	0.000432079	3.36106	Inactive-Active
ENSG00000182809.11	CRIP2	-2.08884	4.78271	-6.47967	1.32687039242365e-05	0.000432756	3.32497	Inactive-Active
ENSG00000164949.8	GEM	-1.84124	3.72205	-6.479	1.32834481193424e-05	0.000432779	3.43143	Inactive-Active
ENSG00000128340.15	RAC2	-1.85535	5.568	-6.47722	1.33231920581889e-05	0.000433616	3.24954	Inactive-Active
ENSG00000119771.15	KLHL29	-1.1265	3.42014	-6.47602	1.33500354328352e-05	0.000434031	3.43605	Inactive-Active
ENSG00000166446.15	CDYL2	-1.36782	3.22557	-6.47402	1.33948720308692e-05	0.000434616	3.44353	Inactive-Active
ENSG00000070081.17	NUCB2	-0.994329	6.19509	-6.47348	1.34070210372128e-05	0.000434616	3.17915	Inactive-Active
ENSG00000077150.20	NFKB2	-1.53391	5.70216	-6.47333	1.34103287466316e-05	0.000434616	3.22386	Inactive-Active
ENSG00000140832.10	MARVELD3	1.19101	5.77889	6.47163	1.34487132338086e-05	0.000435402	3.17562	Inactive-Active
ENSG00000204131.9	NHSL2	-2.084	2.64877	-6.46929	1.35015099594249e-05	0.000436653	3.46746	Inactive-Active
ENSG00000110108.10	TMEM109	-0.830231	5.72859	-6.46694	1.35549864703601e-05	0.000437923	3.20967	Inactive-Active
ENSG00000136436.15	CALCOCO2	0.606172	7.00717	6.46106	1.36893999983964e-05	0.000441705	3.08288	Inactive-Active
ENSG00000259820.1	AC083843.2	1.10027	3.43514	6.46049	1.37025065724721e-05	0.000441705	3.36879	Inactive-Active
ENSG00000158552.13	ZFAND2B	0.651541	4.9137	6.45994	1.37150665646381e-05	0.000441705	3.23596	Inactive-Active
ENSG00000131459.13	GFPT2	-3.05253	1.32633	-6.45564	1.38143808528809e-05	0.000444439	3.409	Inactive-Active
ENSG00000167711.14	SERPINF2	-2.20387	-0.483893	-6.45484	1.38329993316027e-05	0.000444574	3.25372	Inactive-Active
ENSG00000144711.16	IQSEC1	-1.12093	5.79817	-6.45335	1.38677922743022e-05	0.000445228	3.19064	Inactive-Active
ENSG00000255248.9	MIR100HG	-2.41154	2.63113	-6.4496	1.39553130120279e-05	0.00044686	3.43844	Inactive-Active
ENSG00000179477.11	ALOX12B	3.00603	-0.925114	6.44895	1.39704754819158e-05	0.00044686	3.24704	Inactive-Active
ENSG00000203857.10	HSD3B1	4.83075	-2.7834	6.44885	1.39729637948034e-05	0.00044686	2.5901	Inactive-Active
ENSG00000179403.12	VWA1	-1.81271	5.64728	-6.44858	1.39792517156253e-05	0.00044686	3.17853	Inactive-Active
ENSG00000140678.17	ITGAX	-2.58042	4.53915	-6.44808	1.3991110203304e-05	0.00044686	3.29845	Inactive-Active
ENSG00000125730.17	C3	-3.83232	6.43152	-6.44712	1.40136318129683e-05	0.000447116	3.16252	Inactive-Active
ENSG00000114378.17	HYAL1	-1.80123	3.17457	-6.44278	1.41161143902207e-05	0.00044992	3.37361	Inactive-Active
ENSG00000116096.6	SPR	1.11212	5.47405	6.44136	1.41498552648455e-05	0.00045053	3.14786	Inactive-Active
ENSG00000135929.9	CYP27A1	1.09671	4.90657	6.43908	1.42042595978419e-05	0.000451795	3.20285	Inactive-Active
ENSG00000184014.9	DENND5A	-1.5904	4.8387	-6.43415	1.43224763637771e-05	0.000455086	3.24136	Inactive-Active
ENSG00000020129.16	NCDN	-1.00892	3.7851	-6.43294	1.43517092678727e-05	0.000455545	3.31239	Inactive-Active
ENSG00000184164.15	CRELD2	-1.09977	5.9793	-6.43102	1.43982629942819e-05	0.000456552	3.12237	Inactive-Active
ENSG00000180398.13	MCFD2	-0.819816	5.8948	-6.42982	1.44273522130206e-05	0.000456602	3.12771	Inactive-Active
ENSG00000205629.12	LCMT1	0.629081	4.471	6.42973	1.44294535545643e-05	0.000456602	3.21353	Inactive-Active
ENSG00000211662.2	IGLV3-21	-3.64777	7.21132	-6.42859	1.44572683494791e-05	0.000456797	3.0629	Inactive-Active
ENSG00000237159.6	CNTFR-AS1	4.16448	-4.05135	6.42826	1.44652663024441e-05	0.000456797	2.34836	Inactive-Active
ENSG00000090376.11	IRAK3	-1.7424	4.23532	-6.42694	1.44972992793386e-05	0.00045734	3.27722	Inactive-Active
ENSG00000125246.15	CLYBL	1.38342	3.18029	6.42547	1.45332123851698e-05	0.000458004	3.30929	Inactive-Active
ENSG00000187736.13	NHEJ1	1.80039	3.70931	6.42408	1.45673358595747e-05	0.000458611	3.24659	Inactive-Active
ENSG00000101265.16	RASSF2	-1.86036	5.16786	-6.41976	1.46737549587963e-05	0.000461469	3.19233	Inactive-Active
ENSG00000133574.10	GIMAP4	-1.43928	4.94087	-6.41874	1.46990030141126e-05	0.000461469	3.19713	Inactive-Active
ENSG00000188783.6	PRELP	-2.97906	2.45202	-6.41857	1.47030354999963e-05	0.000461469	3.39082	Inactive-Active
ENSG00000183034.13	OTOP2	5.14703	3.37524	6.41616	1.47628896468346e-05	0.000462876	3.21348	Inactive-Active
ENSG00000198855.7	FICD	-1.23665	3.29432	-6.40995	1.49182699956121e-05	0.000466228	3.32049	Inactive-Active
ENSG00000112078.14	KCTD20	-0.671629	6.04905	-6.40972	1.49240328065499e-05	0.000466228	3.08627	Inactive-Active
ENSG00000148343.18	MIGA2	0.703421	5.85261	6.40951	1.49293840682789e-05	0.000466228	3.08068	Inactive-Active
ENSG00000150961.15	SEC24D	-0.978347	6.1714	-6.40947	1.49303072869578e-05	0.000466228	3.06648	Inactive-Active
ENSG00000225663.8	MCRIP1	-1.03414	3.71372	-6.40881	1.49470342612219e-05	0.000466278	3.27516	Inactive-Active
ENSG00000125910.6	S1PR4	-2.77818	1.98736	-6.40003	1.51698805000837e-05	0.000472751	3.36028	Inactive-Active
ENSG00000156587.16	UBE2L6	-1.43911	5.40653	-6.39805	1.52205832820549e-05	0.000473852	3.10986	Inactive-Active
ENSG00000101335.10	MYL9	-2.19744	6.10934	-6.39199	1.53772168840955e-05	0.000478245	3.06499	Inactive-Active
ENSG00000198467.16	TPM2	-2.00793	5.80081	-6.38683	1.55117772922031e-05	0.000481525	3.08466	Inactive-Active
ENSG00000131828.14	PDHA1	0.970806	6.51953	6.38674	1.55139174280253e-05	0.000481525	2.98032	Inactive-Active
ENSG00000152256.14	PDK1	-1.04016	5.9425	-6.38444	1.5574313342403e-05	0.000482525	3.06441	Inactive-Active
ENSG00000133687.16	TMTC1	-1.64113	3.88348	-6.38417	1.55816290752903e-05	0.000482525	3.24693	Inactive-Active
ENSG00000095539.15	SEMA4G	1.25829	6.06044	6.38327	1.56052421742978e-05	0.000482525	3.00356	Inactive-Active
ENSG00000010256.11	UQCRC1	0.903474	7.67161	6.38314	1.56087695544555e-05	0.000482525	2.90064	Inactive-Active
ENSG00000285108.1	AC103718.1	-4.25499	-1.38747	-6.38239	1.56284012410155e-05	0.000482648	2.66144	Inactive-Active
ENSG00000108239.9	TBC1D12	0.743526	4.78062	6.38172	1.56462465463005e-05	0.000482716	3.1075	Inactive-Active
ENSG00000161940.11	BCL6B	-2.11138	2.8028	-6.38082	1.56698493994339e-05	0.00048296	3.32079	Inactive-Active
ENSG00000180340.7	FZD2	-1.78098	2.02705	-6.37708	1.57693970286598e-05	0.000485543	3.32402	Inactive-Active
ENSG00000214293.9	APTR	0.977661	3.83735	6.37646	1.57857111279303e-05	0.00048556	3.18321	Inactive-Active
ENSG00000070190.13	DAPP1	-1.98798	3.94105	-6.37518	1.58199660751506e-05	0.000485656	3.23154	Inactive-Active
ENSG00000163638.13	ADAMTS9	-2.27117	3.75162	-6.37517	1.5820353260294e-05	0.000485656	3.24664	Inactive-Active
ENSG00000107742.13	SPOCK2	-2.18224	4.77494	-6.37433	1.58427027834641e-05	0.000485859	3.14684	Inactive-Active
ENSG00000117620.15	SLC35A3	1.08135	7.24267	6.37272	1.58858506773148e-05	0.000486698	2.91046	Inactive-Active
ENSG00000131873.7	CHSY1	-1.36969	4.81706	-6.36897	1.59870863738273e-05	0.000489313	3.12774	Inactive-Active
ENSG00000132688.11	NES	-1.23275	4.94431	-6.36572	1.60751225620951e-05	0.000491519	3.11518	Inactive-Active
ENSG00000181458.10	TMEM45A	-1.91703	3.0208	-6.36336	1.61395435050127e-05	0.000491877	3.28244	Inactive-Active
ENSG00000268001.1	CARD8-AS1	-1.36153	2.45671	-6.3631	1.61464706195853e-05	0.000491877	3.29307	Inactive-Active
ENSG00000198162.12	MAN1A2	-0.520453	6.4869	-6.36287	1.61526958931355e-05	0.000491877	2.96883	Inactive-Active
ENSG00000270170.2	NCBP2AS2	0.869832	4.27307	6.36278	1.61554137659145e-05	0.000491877	3.11501	Inactive-Active
ENSG00000169902.15	TPST1	-1.9885	2.79136	-6.36209	1.61742648896829e-05	0.000491877	3.28902	Inactive-Active
ENSG00000254887.1	AC010247.1	-4.03249	-3.07683	-6.36178	1.61825840059886e-05	0.000491877	2.26883	Inactive-Active
ENSG00000166741.8	NNMT	-2.78302	3.61243	-6.35845	1.62739999881255e-05	0.000494168	3.23859	Inactive-Active
ENSG00000162298.19	SYVN1	-0.872974	6.40431	-6.35574	1.63490210442223e-05	0.000495958	2.96886	Inactive-Active
ENSG00000235304.2	LINC01281	-4.05242	-3.4762	-6.35449	1.63836073007632e-05	0.000496518	2.11462	Inactive-Active
ENSG00000138722.10	MMRN1	-2.96353	3.20301	-6.35275	1.64320495068394e-05	0.000497497	3.25919	Inactive-Active
ENSG00000235092.6	ID2-AS1	1.92299	2.37749	6.34675	1.6599653692046e-05	0.000501311	3.20751	Inactive-Active
ENSG00000183773.15	AIFM3	2.96525	5.29767	6.34612	1.66173568710512e-05	0.000501311	2.97447	Inactive-Active
ENSG00000180739.14	S1PR5	-2.87548	-0.491708	-6.34604	1.66198332963922e-05	0.000501311	2.93699	Inactive-Active
ENSG00000166986.15	MARS1	-0.732445	6.34462	-6.34592	1.66230801660417e-05	0.000501311	2.95455	Inactive-Active
ENSG00000206538.9	VGLL3	-2.56591	1.70332	-6.34497	1.66499856322917e-05	0.000501632	3.2659	Inactive-Active
ENSG00000134285.11	FKBP11	-1.17273	5.31369	-6.34436	1.66670146589365e-05	0.000501654	3.04485	Inactive-Active
ENSG00000126778.12	SIX1	-4.32807	-3.33434	-6.34365	1.66871261819004e-05	0.00050177	2.18198	Inactive-Active
ENSG00000284543.1	LINC01226	2.12356	0.461299	6.34117	1.67573707725632e-05	0.00050263	3.23919	Inactive-Active
ENSG00000211597.2	IGKJ1	-1.73362	0.860039	-6.34107	1.67602910482096e-05	0.00050263	3.17657	Inactive-Active
ENSG00000173210.20	ABLIM3	-1.07346	3.48279	-6.34092	1.6764675592114e-05	0.00050263	3.20392	Inactive-Active
ENSG00000130475.14	FCHO1	-1.56289	3.31937	-6.33955	1.68035081528166e-05	0.000503305	3.21633	Inactive-Active
ENSG00000060982.15	BCAT1	-1.9703	3.25218	-6.33858	1.68311651698781e-05	0.000503644	3.22487	Inactive-Active
ENSG00000104312.8	RIPK2	-1.42578	3.44618	-6.33787	1.6851500960561e-05	0.000503763	3.18505	Inactive-Active
ENSG00000134758.14	RNF138	0.748422	5.20243	6.33355	1.69753228821069e-05	0.000506973	2.98696	Inactive-Active
ENSG00000173432.12	SAA1	-7.07407	-0.108568	-6.33053	1.70626711741332e-05	0.00050872	3.12917	Inactive-Active
ENSG00000159216.19	RUNX1	-0.985641	5.27479	-6.33038	1.70668323430394e-05	0.00050872	3.01546	Inactive-Active
ENSG00000152128.13	TMEM163	-3.74502	0.756349	-6.32814	1.71319166298353e-05	0.000509801	3.18316	Inactive-Active
ENSG00000184640.20	SEPTIN9	-0.623639	7.98771	-6.32799	1.71361684166709e-05	0.000509801	2.80401	Inactive-Active
ENSG00000261211.1	AL031123.2	2.10478	1.11151	6.32525	1.72161983517522e-05	0.000511444	3.2401	Inactive-Active
ENSG00000172578.12	KLHL6	-1.43082	5.12373	-6.32496	1.7224584217193e-05	0.000511444	3.03552	Inactive-Active
ENSG00000105639.20	JAK3	-2.52524	4.72947	-6.32381	1.72583081049433e-05	0.000511952	3.07284	Inactive-Active
ENSG00000286158.1	AL034548.2	1.77272	0.850736	6.32273	1.72900488481662e-05	0.000512361	3.22794	Inactive-Active
ENSG00000112210.12	RAB23	-1.40316	2.92327	-6.32221	1.7305345912459e-05	0.000512361	3.1997	Inactive-Active
ENSG00000100889.12	PCK2	1.28866	5.67605	6.32053	1.73545182412572e-05	0.000513324	2.92039	Inactive-Active
ENSG00000113615.13	SEC24A	-0.817206	5.8417	-6.31871	1.74082109017525e-05	0.000514319	2.93556	Inactive-Active
ENSG00000122378.14	PRXL2A	0.959417	5.84769	6.31826	1.74215275315151e-05	0.000514319	2.91885	Inactive-Active
ENSG00000266200.6	PNLIPRP2	4.96892	1.13899	6.31466	1.75284084486764e-05	0.000516703	3.21557	Inactive-Active
ENSG00000179583.20	CIITA	-1.74075	5.25345	-6.3144	1.75362533958368e-05	0.000516703	2.98952	Inactive-Active
ENSG00000146094.16	DOK3	-2.15578	4.21197	-6.31385	1.75525813166531e-05	0.000516703	3.10507	Inactive-Active
ENSG00000175600.16	SUGCT	1.97437	1.95159	6.3111	1.76349091561348e-05	0.000518631	3.19636	Inactive-Active
ENSG00000254695.2	AC087379.2	4.22077	-2.90764	6.30975	1.76753605435077e-05	0.000519325	2.55342	Inactive-Active
ENSG00000268089.3	GABRQ	-3.26911	-4.63503	-6.30688	1.77616970448459e-05	0.000521365	1.98548	Inactive-Active
ENSG00000128590.5	DNAJB9	-1.33286	5.54094	-6.3026	1.78915514588389e-05	0.000524677	2.9428	Inactive-Active
ENSG00000285314.1	AC002470.2	4.40916	-3.1666	6.2995	1.79860242167807e-05	0.000526828	2.50182	Inactive-Active
ENSG00000154240.17	CEP112	-1.27114	2.21286	-6.29907	1.79990759857848e-05	0.000526828	3.19239	Inactive-Active
ENSG00000100196.11	KDELR3	-1.42031	4.79533	-6.2969	1.80658590493802e-05	0.000528281	2.97751	Inactive-Active
ENSG00000281398.4	SNHG4	1.23481	3.47461	6.29509	1.81215058052111e-05	0.000529406	3.10249	Inactive-Active
ENSG00000124233.12	SEMG1	-5.17402	-2.63298	-6.29199	1.82173968532557e-05	0.000531703	2.33575	Inactive-Active
ENSG00000228325.5	IGKV3D-7	-2.4163	1.41703	-6.28959	1.82917937255065e-05	0.000533369	3.15852	Inactive-Active
ENSG00000163513.19	TGFBR2	-0.919455	7.29493	-6.28758	1.8354547831016e-05	0.000534622	2.79231	Inactive-Active
ENSG00000090863.12	GLG1	-0.590024	7.2987	-6.2871	1.83694454514811e-05	0.000534622	2.77984	Inactive-Active
ENSG00000090971.5	NAT14	-1.44598	2.15802	-6.28381	1.84727892179035e-05	0.000536801	3.17083	Inactive-Active
ENSG00000114853.15	ZBTB47	-1.54556	3.11837	-6.28352	1.84820700661594e-05	0.000536801	3.12689	Inactive-Active
ENSG00000185432.12	METTL7A	0.800753	7.09658	6.28287	1.85023950163722e-05	0.000536801	2.76655	Inactive-Active
ENSG00000181061.14	HIGD1A	1.35672	6.90487	6.2825	1.85139776568149e-05	0.000536801	2.76886	Inactive-Active
ENSG00000215193.14	PEX26	1.24884	6.8738	6.28176	1.85372555421815e-05	0.000536971	2.76636	Inactive-Active
ENSG00000234593.3	KAZN-AS1	4.27848	-2.4553	6.2806	1.8574188567096e-05	0.000537535	2.58271	Inactive-Active
ENSG00000160932.11	LY6E	-1.6106	3.53099	-6.28001	1.859276284452e-05	0.000537568	3.09025	Inactive-Active
ENSG00000160255.18	ITGB2	-1.77531	6.07642	-6.2792	1.8618262893026e-05	0.00053779	2.87387	Inactive-Active
ENSG00000102109.9	PCSK1N	2.35661	2.56891	6.27867	1.86353262274278e-05	0.00053779	3.09858	Inactive-Active
ENSG00000130414.13	NDUFA10	0.859173	6.82176	6.27773	1.86652326760027e-05	0.000537859	2.77685	Inactive-Active
ENSG00000198792.13	TMEM184B	-0.986412	6.00979	-6.27725	1.86803818404053e-05	0.000537859	2.85649	Inactive-Active
ENSG00000124839.13	RAB17	1.56702	4.70269	6.27695	1.86900865936236e-05	0.000537859	2.92275	Inactive-Active
ENSG00000186063.13	AIDA	-0.664197	5.49767	-6.2748	1.87585441479688e-05	0.000539251	2.885	Inactive-Active
ENSG00000141385.10	AFG3L2	0.947354	6.10469	6.27433	1.87734375779531e-05	0.000539251	2.81599	Inactive-Active
ENSG00000074964.17	ARHGEF10L	1.04003	6.47193	6.27198	1.88490274913813e-05	0.000540714	2.78823	Inactive-Active
ENSG00000161798.7	AQP5	-4.74025	-3.5241	-6.27118	1.88747359757233e-05	0.000540714	1.97407	Inactive-Active
ENSG00000205846.4	CLEC6A	-4.48474	-3.62513	-6.27111	1.88770201443995e-05	0.000540714	2.13768	Inactive-Active
ENSG00000088340.17	FER1L4	-2.18227	5.00604	-6.27038	1.89002917889313e-05	0.00054079	2.98056	Inactive-Active
ENSG00000071242.12	RPS6KA2	-1.40839	5.03324	-6.2696	1.89256188488306e-05	0.00054079	2.92992	Inactive-Active
ENSG00000049249.9	TNFRSF9	-3.70574	0.914521	-6.26939	1.89323096181794e-05	0.00054079	3.08933	Inactive-Active
ENSG00000172086.9	KRCC1	0.759961	6.05455	6.26738	1.89972784891662e-05	0.000541714	2.81032	Inactive-Active
ENSG00000135636.14	DYSF	-2.54644	3.98358	-6.2673	1.899981381005e-05	0.000541714	3.04453	Inactive-Active
ENSG00000173482.17	PTPRM	-1.29911	5.03578	-6.26614	1.90374926783166e-05	0.00054185	2.94176	Inactive-Active
ENSG00000112559.15	MDFI	-3.05837	1.38412	-6.2656	1.90549544022088e-05	0.00054185	3.12776	Inactive-Active
ENSG00000182919.15	C11orf54	1.07196	5.17002	6.26553	1.90573121039882e-05	0.00054185	2.8778	Inactive-Active
ENSG00000126561.18	STAT5A	-1.04918	5.36853	-6.26443	1.90932365152543e-05	0.000542236	2.88644	Inactive-Active
ENSG00000242110.8	AMACR	1.44809	2.4651	6.26403	1.91060701387582e-05	0.000542236	3.09132	Inactive-Active
ENSG00000184588.18	PDE4B	-2.24454	3.88051	-6.26215	1.91675294058564e-05	0.00054348	3.03318	Inactive-Active
ENSG00000214022.11	REPIN1	0.677637	7.50938	6.26155	1.91870671605355e-05	0.000543534	2.71347	Inactive-Active
ENSG00000187513.9	GJA4	-3.37453	1.35277	-6.25956	1.92524156188579e-05	0.000544753	3.12193	Inactive-Active
ENSG00000173681.16	BCLAF3	0.99631	4.747	6.259	1.92708618282817e-05	0.000544753	2.90125	Inactive-Active
ENSG00000060558.4	GNA15	-2.05746	2.74847	-6.25823	1.92962533770607e-05	0.000544753	3.10641	Inactive-Active
ENSG00000123643.13	SLC36A1	1.66316	5.69689	6.25809	1.93008087629261e-05	0.000544753	2.82048	Inactive-Active
ENSG00000185133.14	INPP5J	2.42244	3.80892	6.25514	1.93981740440768e-05	0.000547	2.95284	Inactive-Active
ENSG00000111725.11	PRKAB1	0.821443	5.80294	6.25149	1.95194911029036e-05	0.000549918	2.80815	Inactive-Active
ENSG00000244005.13	NFS1	0.740952	3.94913	6.25093	1.95382376823407e-05	0.000549943	2.9621	Inactive-Active
ENSG00000132622.11	HSPA12B	-2.04153	2.65429	-6.24869	1.96128592590405e-05	0.00055154	3.10403	Inactive-Active
ENSG00000128578.10	STRIP2	-2.68635	1.77365	-6.24679	1.96768232369741e-05	0.000552834	3.11276	Inactive-Active
ENSG00000054967.13	RELT	-1.82786	2.50696	-6.2442	1.97641245709286e-05	0.000554294	3.09935	Inactive-Active
ENSG00000107796.13	ACTA2	-2.18395	5.59664	-6.24418	1.97647300628605e-05	0.000554294	2.85025	Inactive-Active
ENSG00000266028.7	SRGAP2	-1.07201	4.01079	-6.24228	1.98288675473252e-05	0.000555587	2.98613	Inactive-Active
ENSG00000006740.17	ARHGAP44	2.03606	5.49568	6.23796	1.99760333995684e-05	0.000559202	2.78057	Inactive-Active
ENSG00000101213.7	PTK6	1.11834	6.56559	6.2372	2.00019943247331e-05	0.000559421	2.71597	Inactive-Active
ENSG00000127184.13	COX7C	0.679288	7.00632	6.23373	2.01208742272787e-05	0.000562235	2.68711	Inactive-Active
ENSG00000111052.8	LIN7A	-2.27015	1.29255	-6.23106	2.02130922796057e-05	0.0005643	3.07158	Inactive-Active
ENSG00000166866.13	MYO1A	1.74769	7.09189	6.22956	2.02649134113818e-05	0.000565235	2.66069	Inactive-Active
ENSG00000259207.9	ITGB3	-1.48851	3.40543	-6.22859	2.0298431010147e-05	0.000565658	3.0251	Inactive-Active
ENSG00000197860.10	SGTB	-1.31582	2.91209	-6.22594	2.0390833335898e-05	0.00056772	3.04286	Inactive-Active
ENSG00000085117.12	CD82	-1.79888	5.59299	-6.22484	2.04291317499124e-05	0.000568273	2.81871	Inactive-Active
ENSG00000267480.1	AP001542.3	2.09289	0.298114	6.224	2.04586566656772e-05	0.000568581	3.05565	Inactive-Active
ENSG00000180767.10	CHST13	2.34793	0.184909	6.22326	2.04846041611494e-05	0.000568789	3.00909	Inactive-Active
ENSG00000143851.15	PTPN7	-1.80466	4.33657	-6.22228	2.05189315694648e-05	0.00056923	2.924	Inactive-Active
ENSG00000062524.16	LTK	1.46796	4.15675	6.22087	2.05684654726331e-05	0.000570091	2.88103	Inactive-Active
ENSG00000160307.10	S100B	-2.02762	2.07037	-6.21956	2.06144889216904e-05	0.000570853	3.06797	Inactive-Active
ENSG00000153250.20	RBMS1	-1.38103	5.16108	-6.21789	2.06736641719914e-05	0.000571565	2.84443	Inactive-Active
ENSG00000112769.20	LAMA4	-1.20204	6.41335	-6.21779	2.06772838595622e-05	0.000571565	2.75031	Inactive-Active
ENSG00000122861.16	PLAU	-2.35227	4.79385	-6.21608	2.07378715347255e-05	0.000572726	2.88065	Inactive-Active
ENSG00000051108.15	HERPUD1	-0.804975	7.67968	-6.21493	2.07787118846842e-05	0.000572915	2.63564	Inactive-Active
ENSG00000143401.15	ANP32E	-0.792743	5.61927	-6.21435	2.07994243887564e-05	0.000572915	2.77564	Inactive-Active
ENSG00000143753.13	DEGS1	-1.07945	5.20445	-6.21432	2.08005002629607e-05	0.000572915	2.82217	Inactive-Active
ENSG00000167077.13	MEI1	-1.7338	3.7393	-6.21175	2.08923263979251e-05	0.000574931	2.97649	Inactive-Active
ENSG00000263753.8	LINC00667	0.796708	5.0866	6.21044	2.09390012927122e-05	0.000575701	2.79806	Inactive-Active
ENSG00000184867.14	ARMCX2	-1.20256	3.42303	-6.20991	2.09581233604922e-05	0.000575713	2.99159	Inactive-Active
ENSG00000143390.18	RFX5	-0.812857	5.26989	-6.20833	2.1014962972456e-05	0.000576466	2.79595	Inactive-Active
ENSG00000158023.10	CFAP251	-2.51199	-0.223905	-6.20811	2.10229299516232e-05	0.000576466	2.92259	Inactive-Active
ENSG00000054690.14	PLEKHH1	1.47342	5.82033	6.20662	2.10764376203597e-05	0.000576938	2.71361	Inactive-Active
ENSG00000106524.9	ANKMY2	0.694982	4.8314	6.20659	2.10775704083404e-05	0.000576938	2.80671	Inactive-Active
ENSG00000167693.17	NXN	-2.0077	3.45846	-6.20536	2.11220658979781e-05	0.000577643	2.99103	Inactive-Active
ENSG00000198561.15	CTNND1	1.02828	5.15534	6.19922	2.13456417495517e-05	0.000583239	2.7525	Inactive-Active
ENSG00000248690.8	HAS2-AS1	2.05424	-0.0821862	6.19669	2.14383879622855e-05	0.000585255	2.92819	Inactive-Active
ENSG00000117054.15	ACADM	0.902298	6.34693	6.19233	2.15994939593321e-05	0.000589131	2.65585	Inactive-Active
ENSG00000116871.15	MAP7D1	-1.1361	6.21431	-6.19028	2.16755172774754e-05	0.000590682	2.689	Inactive-Active
ENSG00000166033.13	HTRA1	-1.92424	4.68548	-6.1895	2.17044530597103e-05	0.000590948	2.84934	Inactive-Active
ENSG00000168542.16	COL3A1	-2.10706	10.2117	-6.18895	2.1724989152258e-05	0.000590985	2.48253	Inactive-Active
ENSG00000247516.8	MIR4458HG	1.12492	2.33464	6.1878	2.17678949616844e-05	0.00059163	2.99651	Inactive-Active
ENSG00000262877.5	AC110285.2	1.89476	2.42458	6.18611	2.18311849021309e-05	0.000592405	2.97132	Inactive-Active
ENSG00000152465.18	NMT2	0.822442	4.4807	6.18601	2.18348412930587e-05	0.000592405	2.80614	Inactive-Active
ENSG00000066468.23	FGFR2	1.89848	4.80657	6.18345	2.19311028546924e-05	0.000593388	2.74073	Inactive-Active
ENSG00000007047.15	MARK4	-0.95735	4.07333	-6.1833	2.19368314824663e-05	0.000593388	2.85238	Inactive-Active
ENSG00000145246.14	ATP10D	-0.894348	4.24402	-6.18322	2.19396562821308e-05	0.000593388	2.84987	Inactive-Active
ENSG00000225421.2	AC019330.1	5.45423	-0.334852	6.183	2.19481098420721e-05	0.000593388	2.99945	Inactive-Active
ENSG00000108819.11	PPP1R9B	-0.945168	6.0003	-6.18182	2.19924832187879e-05	0.000594067	2.69922	Inactive-Active
ENSG00000006210.7	CX3CL1	-1.55407	3.45053	-6.1805	2.20424458047974e-05	0.000594761	2.93083	Inactive-Active
ENSG00000010610.10	CD4	-1.24603	5.80967	-6.17945	2.20821137244574e-05	0.000594761	2.71088	Inactive-Active
ENSG00000101294.18	HM13	-0.926661	6.51766	-6.1791	2.20954987974703e-05	0.000594761	2.646	Inactive-Active
ENSG00000026025.16	VIM	-1.66062	7.14447	-6.17886	2.21047071920277e-05	0.000594761	2.62393	Inactive-Active
ENSG00000142089.17	IFITM3	-1.53276	6.76239	-6.1786	2.21146470912039e-05	0.000594761	2.63416	Inactive-Active
ENSG00000166819.12	PLIN1	2.42683	0.154472	6.17685	2.21809995352239e-05	0.000595453	2.95173	Inactive-Active
ENSG00000178814.17	OPLAH	1.13177	4.93029	6.17621	2.22053956780402e-05	0.000595453	2.73569	Inactive-Active
ENSG00000233532.6	LINC00460	-4.21404	-3.78484	-6.17604	2.22119835659515e-05	0.000595453	1.87491	Inactive-Active
ENSG00000141424.13	SLC39A6	-1.13077	4.85146	-6.17589	2.22176799782649e-05	0.000595453	2.78404	Inactive-Active
ENSG00000133606.11	MKRN1	0.728633	7.41012	6.17203	2.23654982664032e-05	0.000598894	2.54855	Inactive-Active
ENSG00000203859.10	HSD3B2	5.44574	-0.16675	6.16955	2.24609588686771e-05	0.000600549	2.90773	Inactive-Active
ENSG00000249896.2	LINC02495	-4.15548	-3.16205	-6.16886	2.24875904531419e-05	0.000600549	2.00102	Inactive-Active
ENSG00000160999.10	SH2B2	-1.73782	2.58346	-6.16873	2.24928571954533e-05	0.000600549	2.96466	Inactive-Active
ENSG00000091527.16	CDV3	-0.778447	7.43384	-6.16788	2.25256103221866e-05	0.000600549	2.56	Inactive-Active
ENSG00000143183.18	TMCO1	0.660481	6.99787	6.16699	2.25601581853884e-05	0.000600549	2.57058	Inactive-Active
ENSG00000073464.13	CLCN4	-1.77873	1.95375	-6.16644	2.25813741340231e-05	0.000600549	2.98027	Inactive-Active
ENSG00000106976.21	DNM1	-1.50738	4.18634	-6.1664	2.25831558735804e-05	0.000600549	2.86679	Inactive-Active
ENSG00000110719.10	TCIRG1	-0.828949	7.00618	-6.1664	2.25831816966765e-05	0.000600549	2.59001	Inactive-Active
ENSG00000185739.13	SRL	-2.10233	-0.356135	-6.16513	2.26322990377848e-05	0.000601336	2.71133	Inactive-Active
ENSG00000187601.5	MAGEH1	-1.29326	3.61583	-6.16301	2.27150438008213e-05	0.000602315	2.88549	Inactive-Active
ENSG00000153814.13	JAZF1	-1.3824	3.09161	-6.16301	2.2715206607063e-05	0.000602315	2.92852	Inactive-Active
ENSG00000119227.8	PIGZ	2.02051	5.6628	6.16268	2.2727779532276e-05	0.000602315	2.63892	Inactive-Active
ENSG00000170004.17	CHD3	-0.733029	7.29622	-6.15766	2.29251040899536e-05	0.000606645	2.55791	Inactive-Active
ENSG00000145936.9	KCNMB1	-2.34173	1.96048	-6.15723	2.29418002548011e-05	0.000606645	2.96609	Inactive-Active
ENSG00000140859.16	KIFC3	-2.05146	3.62205	-6.15645	2.29727591496621e-05	0.000606645	2.88037	Inactive-Active
ENSG00000196642.19	RABL6	0.47225	6.99812	6.15585	2.29966247645874e-05	0.000606645	2.55488	Inactive-Active
ENSG00000116670.15	MAD2L2	-1.41954	3.15961	-6.15553	2.30092616252879e-05	0.000606645	2.90545	Inactive-Active
ENSG00000115170.15	ACVR1	-1.00076	4.40044	-6.1554	2.30144322925135e-05	0.000606645	2.78146	Inactive-Active
ENSG00000178075.20	GRAMD1C	1.12342	3.89478	6.15489	2.30346928707972e-05	0.000606645	2.78015	Inactive-Active
ENSG00000254042.2	SLIT3-AS2	3.44478	0.276116	6.15413	2.30648415429057e-05	0.000606645	2.94519	Inactive-Active
ENSG00000138095.19	LRPPRC	0.831628	7.1714	6.15404	2.30683096665545e-05	0.000606645	2.53727	Inactive-Active
ENSG00000234770.1	GULOP	3.90571	-3.7179	6.15008	2.3226169874886e-05	0.000609177	2.09908	Inactive-Active
ENSG00000075234.17	TTC38	0.961955	6.44688	6.14984	2.3235476132904e-05	0.000609177	2.56501	Inactive-Active
ENSG00000142798.20	HSPG2	-1.23162	7.06243	-6.14981	2.32367998238794e-05	0.000609177	2.56295	Inactive-Active
ENSG00000006042.12	TMEM98	1.14406	6.1568	6.14964	2.32436438472656e-05	0.000609177	2.59496	Inactive-Active
ENSG00000007216.15	SLC13A2	5.62181	1.53207	6.14847	2.32904657395872e-05	0.000609886	2.90699	Inactive-Active
ENSG00000171016.13	PYGO1	-1.54912	1.97929	-6.14231	2.35387100443145e-05	0.000615863	2.94216	Inactive-Active
ENSG00000164687.11	FABP5	0.986664	4.91447	6.14131	2.35795204642448e-05	0.000616407	2.68952	Inactive-Active
ENSG00000146039.11	SLC17A4	2.85342	5.39233	6.13956	2.36507970532166e-05	0.000617225	2.60329	Inactive-Active
ENSG00000110446.12	SLC15A3	-1.16939	4.73838	-6.13956	2.365084399269e-05	0.000617225	2.73229	Inactive-Active
ENSG00000198682.13	PAPSS2	1.08085	7.61842	6.13628	2.37846225386621e-05	0.000619816	2.46757	Inactive-Active
ENSG00000139865.16	TTC6	2.50342	0.12278	6.13606	2.37938800413219e-05	0.000619816	2.89899	Inactive-Active
ENSG00000188015.10	S100A3	-3.56392	-0.79089	-6.13565	2.38104720543767e-05	0.000619816	2.55204	Inactive-Active
ENSG00000083444.17	PLOD1	-1.20882	5.86306	-6.13419	2.38703988794627e-05	0.00062055	2.61728	Inactive-Active
ENSG00000086300.16	SNX10	-1.93522	3.0283	-6.13399	2.38789161540874e-05	0.00062055	2.87815	Inactive-Active
ENSG00000230246.7	SPATA31C1	3.77785	-3.78106	6.13017	2.40366635192604e-05	0.000624123	2.06224	Inactive-Active
ENSG00000142515.15	KLK3	2.69481	1.08712	6.12886	2.40907885950518e-05	0.000624372	2.92014	Inactive-Active
ENSG00000023902.14	PLEKHO1	-1.41535	5.02836	-6.12876	2.40951619721747e-05	0.000624372	2.68962	Inactive-Active
ENSG00000176058.13	TPRN	1.36704	6.26295	6.12847	2.41070093450765e-05	0.000624372	2.54335	Inactive-Active
ENSG00000141448.11	GATA6	1.11939	4.98332	6.12759	2.41438602264995e-05	0.000624801	2.64169	Inactive-Active
ENSG00000243279.4	PRAF2	-1.67179	0.87109	-6.12611	2.42053595594735e-05	0.000625365	2.88565	Inactive-Active
ENSG00000198796.7	ALPK2	-4.87327	-0.493078	-6.12606	2.42075242626525e-05	0.000625365	2.75135	Inactive-Active
ENSG00000117528.14	ABCD3	0.90065	6.79861	6.1256	2.42265410445586e-05	0.000625365	2.50287	Inactive-Active
ENSG00000149428.19	HYOU1	-0.872027	6.70332	-6.12321	2.43265953068886e-05	0.000627423	2.5263	Inactive-Active
ENSG00000178033.6	CALHM5	-1.83728	1.8774	-6.12123	2.44102295316099e-05	0.000629053	2.90769	Inactive-Active
ENSG00000104164.12	BLOC1S6	-0.65119	5.83959	-6.1203	2.44491898468785e-05	0.000629531	2.59524	Inactive-Active
ENSG00000235750.10	KIAA0040	-0.99462	5.17698	-6.11747	2.45691509494135e-05	0.000632092	2.64381	Inactive-Active
ENSG00000166598.16	HSP90B1	-0.900014	9.46507	-6.11576	2.46416985275883e-05	0.000633429	2.358	Inactive-Active
ENSG00000078081.8	LAMP3	-2.97807	2.56486	-6.11282	2.47669688457061e-05	0.000636119	2.87542	Inactive-Active
ENSG00000071246.11	VASH1	-1.33046	4.35799	-6.11079	2.48539090788281e-05	0.000637489	2.72225	Inactive-Active
ENSG00000050730.16	TNIP3	-4.99632	2.01108	-6.11061	2.48616788710296e-05	0.000637489	2.87757	Inactive-Active
ENSG00000211598.2	IGKV4-1	-2.25826	8.68465	-6.10957	2.49065002671059e-05	0.000637913	2.40779	Inactive-Active
ENSG00000140948.13	ZCCHC14	0.595505	5.80707	6.10926	2.49195988256878e-05	0.000637913	2.56369	Inactive-Active
ENSG00000211679.2	IGLC3	-2.51389	9.44061	-6.10456	2.51227610629937e-05	0.000642042	2.35926	Inactive-Active
ENSG00000080845.18	DLGAP4	-0.671451	5.26043	-6.10435	2.51318300385211e-05	0.000642042	2.60592	Inactive-Active
ENSG00000105552.15	BCAT2	1.12467	4.99721	6.10409	2.51433808528844e-05	0.000642042	2.59769	Inactive-Active
ENSG00000158158.12	CNNM4	1.50132	6.94855	6.10291	2.51946764943157e-05	0.000642401	2.44931	Inactive-Active
ENSG00000164088.18	PPM1M	-1.30935	3.92823	-6.10281	2.51991345334964e-05	0.000642401	2.75486	Inactive-Active
ENSG00000167969.13	ECI1	0.79908	5.6602	6.10232	2.52204386051548e-05	0.000642413	2.54685	Inactive-Active
ENSG00000142949.17	PTPRF	1.1491	8.69018	6.09866	2.5380437618675e-05	0.000645954	2.34554	Inactive-Active
ENSG00000117118.10	SDHB	0.795582	6.06248	6.09815	2.54026740148693e-05	0.000645987	2.50879	Inactive-Active
ENSG00000113758.13	DBN1	-1.54448	4.46378	-6.09675	2.54640603113416e-05	0.000646936	2.69669	Inactive-Active
ENSG00000163541.12	SUCLG1	1.0854	6.61886	6.09635	2.54819724867161e-05	0.000646936	2.46128	Inactive-Active
ENSG00000164983.8	TMEM65	0.880091	5.1199	6.09291	2.56336928734451e-05	0.000650252	2.58336	Inactive-Active
ENSG00000223829.6	AC004870.2	3.15694	-2.61424	6.0919	2.56785957439932e-05	0.000650855	2.27467	Inactive-Active
ENSG00000111450.14	STX2	-1.32303	3.45298	-6.08914	2.5801394591022e-05	0.00065343	2.78069	Inactive-Active
ENSG00000099338.23	CATSPERG	1.37947	1.63458	6.08571	2.59549463172422e-05	0.000656643	2.83824	Inactive-Active
ENSG00000172830.13	SSH3	0.690832	5.60237	6.08536	2.59708475421667e-05	0.000656643	2.52918	Inactive-Active
ENSG00000210082.2	MT-RNR2	1.08195	14.3106	6.08437	2.60155952875643e-05	0.000656855	2.1345	Inactive-Active
ENSG00000169245.6	CXCL10	-3.24424	2.16402	-6.08423	2.60218506600143e-05	0.000656855	2.84086	Inactive-Active
ENSG00000198799.12	LRIG2	0.604962	4.69995	6.0813	2.61541182912219e-05	0.000659653	2.60464	Inactive-Active
ENSG00000173080.6	RXFP4	2.21848	0.969685	6.08064	2.61839550159375e-05	0.000659866	2.84071	Inactive-Active
ENSG00000188227.13	ZNF793	1.41177	3.11564	6.07914	2.62521902009729e-05	0.000661045	2.75891	Inactive-Active
ENSG00000258918.1	AL355922.4	3.76249	-3.86415	6.07852	2.62801370906739e-05	0.000661208	1.97109	Inactive-Active
ENSG00000163273.4	NPPC	-4.33735	-3.09914	-6.078	2.63038438654906e-05	0.000661265	1.84851	Inactive-Active
ENSG00000154263.17	ABCA10	1.58737	3.27922	6.076	2.63950077248814e-05	0.000663016	2.7414	Inactive-Active
ENSG00000164406.8	LEAP2	1.73473	1.70602	6.07498	2.64418588196242e-05	0.000663652	2.83007	Inactive-Active
ENSG00000100731.16	PCNX1	-0.850689	5.74239	-6.07436	2.64700581696941e-05	0.000663819	2.5276	Inactive-Active
ENSG00000184575.12	XPOT	-0.607513	5.87244	-6.07353	2.65083368010604e-05	0.000664239	2.50976	Inactive-Active
ENSG00000198964.14	SGMS1	-0.920062	4.74185	-6.07298	2.6533652408919e-05	0.000664333	2.60179	Inactive-Active
ENSG00000275897.1	AC021491.4	3.86565	-0.889907	6.07099	2.6625052491515e-05	0.000665538	2.74969	Inactive-Active
ENSG00000148700.15	ADD3	0.75512	7.30307	6.07082	2.66327983855503e-05	0.000665538	2.3859	Inactive-Active
ENSG00000004897.12	CDC27	-0.596863	5.47571	-6.07053	2.66465615945614e-05	0.000665538	2.52972	Inactive-Active
ENSG00000073350.14	LLGL2	1.18836	7.96109	6.06701	2.6809539410375e-05	0.000669066	2.32666	Inactive-Active
ENSG00000070019.5	GUCY2C	1.16533	5.98833	6.06604	2.68546876186195e-05	0.000669651	2.45152	Inactive-Active
ENSG00000067167.8	TRAM1	-0.701261	7.94629	-6.06439	2.69314585127879e-05	0.000671022	2.34782	Inactive-Active
ENSG00000166387.13	PPFIBP2	0.6821	5.58032	6.06265	2.70129405153593e-05	0.000672424	2.4897	Inactive-Active
ENSG00000152402.11	GUCY1A2	-2.04393	1.71289	-6.06225	2.70313366961012e-05	0.000672424	2.8091	Inactive-Active
ENSG00000163053.11	SLC16A14	-1.13838	3.31556	-6.05981	2.71463021250471e-05	0.000674739	2.72716	Inactive-Active
ENSG00000197273.4	GUCA2A	4.17897	6.2371	6.05827	2.72186450622855e-05	0.000675992	2.38319	Inactive-Active
ENSG00000007933.13	FMO3	-3.73924	0.34435	-6.05665	2.72954788486543e-05	0.000677354	2.64755	Inactive-Active
ENSG00000176894.10	PXMP2	1.73364	1.92862	6.05592	2.73300778508216e-05	0.000677667	2.77263	Inactive-Active
ENSG00000078900.15	TP73	-2.18422	0.516294	-6.05174	2.75288341464347e-05	0.000681542	2.73728	Inactive-Active
ENSG00000114315.4	HES1	1.4351	6.07229	6.05132	2.75490013032317e-05	0.000681542	2.43058	Inactive-Active
ENSG00000239862.1	IGKV1-37	-3.50758	0.229412	-6.05112	2.75586191283503e-05	0.000681542	2.68927	Inactive-Active
ENSG00000028277.21	POU2F2	-2.38191	4.83463	-6.05078	2.75747954306257e-05	0.000681542	2.60939	Inactive-Active
ENSG00000120498.14	TEX11	2.29629	0.984193	6.04814	2.77014733353345e-05	0.000683392	2.78734	Inactive-Active
ENSG00000250137.1	AC093607.1	3.35357	-0.39515	6.04794	2.77110661885969e-05	0.000683392	2.69353	Inactive-Active
ENSG00000088756.13	ARHGAP28	-1.54093	2.92737	-6.04736	2.77386418094629e-05	0.000683392	2.751	Inactive-Active
ENSG00000211454.15	AKR7L	1.39127	2.65411	6.04722	2.77453361619142e-05	0.000683392	2.73121	Inactive-Active
ENSG00000169992.10	NLGN2	-1.67583	1.48553	-6.04691	2.77605276045152e-05	0.000683392	2.7809	Inactive-Active
ENSG00000171208.10	NETO2	1.73699	3.93259	6.04498	2.78538642926722e-05	0.000684138	2.61998	Inactive-Active
ENSG00000133026.13	MYH10	-1.71434	4.15286	-6.04482	2.78614763519442e-05	0.000684138	2.64453	Inactive-Active
ENSG00000224389.9	C4B	-3.24732	2.95333	-6.04442	2.78808383545414e-05	0.000684138	2.75593	Inactive-Active
ENSG00000169604.21	ANTXR1	-1.53127	6.10914	-6.04424	2.78896312126427e-05	0.000684138	2.46854	Inactive-Active
ENSG00000204370.13	SDHD	0.87224	6.46572	6.04398	2.79018128408103e-05	0.000684138	2.38295	Inactive-Active
ENSG00000144040.13	SFXN5	0.779499	4.47621	6.03815	2.81857717006792e-05	0.000689618	2.54381	Inactive-Active
ENSG00000138944.8	SHISAL1	-1.9973	2.49662	-6.03807	2.81899120098482e-05	0.000689618	2.75267	Inactive-Active
ENSG00000164054.15	SHISA5	-0.771872	6.45401	-6.03802	2.81924404916947e-05	0.000689618	2.39588	Inactive-Active
ENSG00000200732.1	RNU6-194P	-3.26403	-3.98159	-6.03228	2.8474651960757e-05	0.000695442	1.79288	Inactive-Active
ENSG00000135953.11	MFSD9	0.706052	5.19732	6.03226	2.84756250698197e-05	0.000695442	2.46227	Inactive-Active
ENSG00000196352.16	CD55	-3.05185	6.45233	-6.03124	2.85263135181061e-05	0.000695454	2.39804	Inactive-Active
ENSG00000100077.15	GRK3	-1.4393	3.79219	-6.0312	2.8528556246419e-05	0.000695454	2.63591	Inactive-Active
ENSG00000135604.10	STX11	-2.19184	2.4944	-6.03089	2.85438318766998e-05	0.000695454	2.73787	Inactive-Active
ENSG00000162889.11	MAPKAPK2	-0.974709	6.86794	-6.02799	2.86877825210993e-05	0.000697413	2.35593	Inactive-Active
ENSG00000091140.14	DLD	0.716853	6.86175	6.02764	2.8705602661187e-05	0.000697413	2.3327	Inactive-Active
ENSG00000163683.12	SMIM14	0.984311	7.405	6.0275	2.87124234977939e-05	0.000697413	2.29211	Inactive-Active
ENSG00000105974.13	CAV1	-1.80897	5.66976	-6.02745	2.87147555421307e-05	0.000697413	2.46709	Inactive-Active
ENSG00000198435.4	NRARP	1.61129	6.76296	6.02384	2.88957509306887e-05	0.000700771	2.32449	Inactive-Active
ENSG00000110237.5	ARHGEF17	-1.09136	4.94483	-6.02379	2.88984958611357e-05	0.000700771	2.52125	Inactive-Active
ENSG00000134061.5	CD180	-2.02299	3.38445	-6.0211	2.90337374601191e-05	0.000703498	2.66782	Inactive-Active
ENSG00000148660.21	CAMK2G	0.70142	6.0111	6.02031	2.9073548075675e-05	0.000703909	2.39023	Inactive-Active
ENSG00000123243.15	ITIH5	-1.4037	5.46125	-6.0197	2.91045811548673e-05	0.000704107	2.46681	Inactive-Active
ENSG00000166780.11	BMERB1	-1.86814	1.72726	-6.01381	2.94041635266827e-05	0.000710797	2.73063	Inactive-Active
ENSG00000106991.14	ENG	-1.73394	5.83219	-6.01242	2.94753447912116e-05	0.000711369	2.42568	Inactive-Active
ENSG00000146374.14	RSPO3	-2.58378	1.78531	-6.01216	2.94887154691729e-05	0.000711369	2.72411	Inactive-Active
ENSG00000185989.11	RASA3	-1.00614	3.94727	-6.01164	2.95155568460558e-05	0.000711369	2.59196	Inactive-Active
ENSG00000252412.1	Y_RNA	2.17484	-0.506542	6.01155	2.95201561035897e-05	0.000711369	2.63986	Inactive-Active
ENSG00000254087.8	LYN	-1.56899	5.75339	-6.00881	2.96612782874539e-05	0.000714211	2.4073	Inactive-Active
ENSG00000123472.12	ATPAF1	0.758894	5.63602	6.00835	2.96853947050289e-05	0.000714234	2.39141	Inactive-Active
ENSG00000043462.13	LCP2	-1.69984	4.9944	-6.00425	2.98980549239598e-05	0.000718789	2.4716	Inactive-Active
ENSG00000019582.16	CD74	-1.36191	10.2426	-6.00243	2.9992676369399e-05	0.000720502	2.12516	Inactive-Active
ENSG00000117305.15	HMGCL	0.741735	5.72964	6.00047	3.00954471227104e-05	0.000722408	2.35919	Inactive-Active
ENSG00000101074.5	R3HDML	2.59999	0.305429	5.99943	3.01498135661701e-05	0.00072315	2.68525	Inactive-Active
ENSG00000034053.14	APBA2	-2.24632	1.71746	-5.99656	3.03012460059637e-05	0.000726217	2.69789	Inactive-Active
ENSG00000137962.13	ARHGAP29	-1.74277	3.79573	-5.99563	3.03503811665027e-05	0.000726829	2.583	Inactive-Active
ENSG00000125810.10	CD93	-1.96233	5.94142	-5.99303	3.04880653518142e-05	0.00072956	2.38529	Inactive-Active
ENSG00000158122.12	PRXL2C	-1.33556	2.82743	-5.98773	3.07710743968327e-05	0.00073576	2.64471	Inactive-Active
ENSG00000227388.3	AL133410.1	1.5969	1.63359	5.98603	3.08627378747797e-05	0.00073738	2.682	Inactive-Active
ENSG00000272141.1	AL390719.2	1.48492	4.55543	5.98264	3.10456709504836e-05	0.000741176	2.42594	Inactive-Active
ENSG00000132313.15	MRPL35	0.879782	5.94571	5.98194	3.10837709625271e-05	0.000741512	2.30959	Inactive-Active
ENSG00000198276.16	UCKL1	0.643267	4.98408	5.98124	3.11212674690008e-05	0.000741576	2.40636	Inactive-Active
ENSG00000166523.8	CLEC4E	-5.49147	-1.49836	-5.981	3.11345908650769e-05	0.000741576	2.41988	Inactive-Active
ENSG00000266088.6	AC004585.1	-4.8289	-1.12855	-5.97815	3.12896856397511e-05	0.000744234	2.31834	Inactive-Active
ENSG00000118492.18	ADGB	2.45144	-1.1691	5.97776	3.13110859890342e-05	0.000744234	2.54471	Inactive-Active
ENSG00000044012.4	GUCA2B	4.07309	4.17205	5.97762	3.13186303857799e-05	0.000744234	2.3812	Inactive-Active
ENSG00000089022.14	MAPKAPK5	0.759659	5.43508	5.97591	3.14121793376257e-05	0.000745882	2.34838	Inactive-Active
ENSG00000173546.7	CSPG4	-1.76365	3.25516	-5.97281	3.15830627023252e-05	0.000749362	2.60768	Inactive-Active
ENSG00000169756.16	LIMS1	-0.809953	6.08434	-5.96951	3.17653743134279e-05	0.000752861	2.31279	Inactive-Active
ENSG00000157368.11	IL34	-1.30522	3.01173	-5.9689	3.17991907010768e-05	0.000752861	2.61505	Inactive-Active
ENSG00000134030.14	CTIF	-1.19788	1.87822	-5.96882	3.18038152148849e-05	0.000752861	2.64974	Inactive-Active
ENSG00000170482.17	SLC23A1	1.90672	2.23258	5.96827	3.18342340977954e-05	0.000753003	2.62778	Inactive-Active
ENSG00000127507.18	ADGRE2	-2.318	3.35317	-5.96771	3.18650765849486e-05	0.000753155	2.58058	Inactive-Active
ENSG00000164221.13	CCDC112	0.786973	4.37538	5.96451	3.20439460433178e-05	0.000756308	2.41969	Inactive-Active
ENSG00000173852.15	DPY19L1	-0.957651	5.23478	-5.96445	3.20475651937732e-05	0.000756308	2.3621	Inactive-Active
ENSG00000196177.13	ACADSB	1.02961	5.3542	5.96329	3.21120867792481e-05	0.000757251	2.32202	Inactive-Active
ENSG00000115594.12	IL1R1	-1.29403	6.47373	-5.95828	3.23947545472032e-05	0.000763332	2.27471	Inactive-Active
ENSG00000280420.1	AC005355.2	3.50967	-3.87955	5.95757	3.24348058584545e-05	0.000763692	1.83676	Inactive-Active
ENSG00000263429.3	TMEM238L	1.96689	1.37788	5.95696	3.24697666951917e-05	0.000763932	2.6249	Inactive-Active
ENSG00000140464.20	PML	-0.992718	5.62364	-5.95587	3.25317367651918e-05	0.000764806	2.32682	Inactive-Active
ENSG00000196154.12	S100A4	-1.69617	5.25468	-5.95313	3.26875325184389e-05	0.000767883	2.37075	Inactive-Active
ENSG00000198626.17	RYR2	-2.55136	0.368183	-5.95258	3.27192537655618e-05	0.000768043	2.58086	Inactive-Active
ENSG00000167037.19	SGSM1	1.9248	2.13508	5.95103	3.28078543944289e-05	0.000769536	2.60307	Inactive-Active
ENSG00000186283.14	TOR3A	-0.783739	5.85438	-5.94845	3.29565771201069e-05	0.000772437	2.28975	Inactive-Active
ENSG00000234608.8	MAPKAPK5-AS1	0.847485	4.49041	5.9474	3.30167779455277e-05	0.00077326	2.37621	Inactive-Active
ENSG00000118804.9	STBD1	1.80219	1.82047	5.94621	3.30860971615629e-05	0.000774295	2.58864	Inactive-Active
ENSG00000232354.8	VIPR1-AS1	2.58435	2.32889	5.94534	3.31360182915333e-05	0.000774865	2.56114	Inactive-Active
ENSG00000116191.17	RALGPS2	-0.872739	6.02406	-5.94492	3.3160731269381e-05	0.000774865	2.26887	Inactive-Active
ENSG00000188157.15	AGRN	-1.03117	6.97576	-5.94408	3.3209597987915e-05	0.000775419	2.19956	Inactive-Active
ENSG00000164111.15	ANXA5	-1.35458	7.16399	-5.94165	3.33507331452702e-05	0.000777752	2.18708	Inactive-Active
ENSG00000102174.9	PHEX	-3.27645	-1.49751	-5.9415	3.3359974765679e-05	0.000777752	2.29672	Inactive-Active
ENSG00000134716.11	CYP2J2	1.61471	4.48929	5.94066	3.340859363254e-05	0.000778296	2.34182	Inactive-Active
ENSG00000147224.13	PRPS1	-0.748878	4.3583	-5.94013	3.34397997859771e-05	0.000778435	2.41185	Inactive-Active
ENSG00000105137.13	SYDE1	-1.46263	3.44763	-5.93943	3.34809825422818e-05	0.000778806	2.52877	Inactive-Active
ENSG00000104903.5	LYL1	-2.28954	2.53982	-5.93664	3.36445584895014e-05	0.00078202	2.57691	Inactive-Active
ENSG00000151468.11	CCDC3	-3.39385	2.37051	-5.93407	3.37965652336547e-05	0.000784962	2.58846	Inactive-Active
ENSG00000164241.13	C5orf63	1.26947	3.48754	5.93351	3.38296473326825e-05	0.000785138	2.45819	Inactive-Active
ENSG00000130675.15	MNX1	1.75942	3.51211	5.93295	3.38627923732527e-05	0.000785316	2.43562	Inactive-Active
ENSG00000261742.6	LINC00922	-4.55092	-3.48458	-5.93199	3.39200636614128e-05	0.000786053	1.68366	Inactive-Active
ENSG00000150054.18	MPP7	1.40521	4.92661	5.93141	3.39542859898699e-05	0.000786255	2.29947	Inactive-Active
ENSG00000129518.9	EAPP	0.894144	5.27809	5.92976	3.40528892780071e-05	0.000787946	2.2733	Inactive-Active
ENSG00000151327.13	FAM177A1	0.634519	6.22842	5.9263	3.42597526932037e-05	0.000792138	2.1954	Inactive-Active
ENSG00000160796.18	NBEAL2	-0.723841	7.00434	-5.92533	3.43182367641232e-05	0.000792895	2.16631	Inactive-Active
ENSG00000150867.14	PIP4K2A	-1.14399	4.87345	-5.92389	3.44048889742758e-05	0.000794302	2.33725	Inactive-Active
ENSG00000136167.15	LCP1	-2.07402	6.66921	-5.92109	3.45740563446052e-05	0.000796436	2.18772	Inactive-Active
ENSG00000172020.13	GAP43	-4.64825	-3.18651	-5.92085	3.45887938611301e-05	0.000796436	1.80589	Inactive-Active
ENSG00000211594.2	IGKJ4	-1.54057	2.51685	-5.92073	3.45956949475746e-05	0.000796436	2.56567	Inactive-Active
ENSG00000287527.1	AC005753.3	2.04761	-0.701804	5.92065	3.46006771047429e-05	0.000796436	2.47504	Inactive-Active
ENSG00000184076.13	UQCR10	0.896297	3.49337	5.92018	3.46288928824616e-05	0.00079649	2.41811	Inactive-Active
ENSG00000135480.16	KRT7	-4.40763	0.256567	-5.91965	3.46615816455749e-05	0.000796648	2.48532	Inactive-Active
ENSG00000211666.2	IGLV2-14	-2.02274	8.86362	-5.91865	3.47224019262134e-05	0.000797451	2.06665	Inactive-Active
ENSG00000145040.4	UCN2	-5.29299	-2.85929	-5.91709	3.4817529177015e-05	0.00079904	1.72728	Inactive-Active
ENSG00000160113.6	NR2F6	0.90369	6.4162	5.9151	3.49393635871298e-05	0.000801138	2.15606	Inactive-Active
ENSG00000204381.12	LAYN	-1.6879	1.79402	-5.91474	3.4960924055779e-05	0.000801138	2.56498	Inactive-Active
ENSG00000196418.12	ZNF124	1.30302	3.28855	5.90962	3.52764481497255e-05	0.000807298	2.43465	Inactive-Active
ENSG00000137414.6	FAM8A1	0.615209	6.24579	5.90953	3.52821201274306e-05	0.000807298	2.16285	Inactive-Active
ENSG00000189060.5	H1-0	0.800924	8.17002	5.9062	3.54891473815872e-05	0.000811433	2.03063	Inactive-Active
ENSG00000086696.11	HSD17B2	1.47726	5.81737	5.90549	3.55329429208498e-05	0.000811832	2.19357	Inactive-Active
ENSG00000152642.11	GPD1L	1.34693	6.38698	5.90364	3.56487893979909e-05	0.000813341	2.12771	Inactive-Active
ENSG00000137710.17	RDX	-1.18942	4.99122	-5.90359	3.56517867421501e-05	0.000813341	2.28927	Inactive-Active
ENSG00000204304.12	PBX2	-0.741688	4.74239	-5.90313	3.56807433133277e-05	0.0008134	2.30424	Inactive-Active
ENSG00000069424.15	KCNAB2	-1.46573	4.49024	-5.90223	3.57370257284502e-05	0.000813568	2.33829	Inactive-Active
ENSG00000137714.3	FDX1	0.770047	5.01579	5.90217	3.57409322048675e-05	0.000813568	2.24565	Inactive-Active
ENSG00000205189.12	ZBTB10	1.10555	4.70945	5.90121	3.58013340852074e-05	0.000814342	2.25818	Inactive-Active
ENSG00000242371.1	IGKV1-39	-2.30527	8.31926	-5.90074	3.58305991408784e-05	0.000814406	2.0589	Inactive-Active
ENSG00000171700.14	RGS19	-1.67767	3.76177	-5.89853	3.59702470557287e-05	0.000816978	2.40768	Inactive-Active
ENSG00000120137.7	PANK3	1.12234	7.23266	5.89728	3.60492858981037e-05	0.00081817	2.06823	Inactive-Active
ENSG00000214402.7	LCNL1	-4.98966	-0.91798	-5.89375	3.6273384971573e-05	0.00082265	2.20413	Inactive-Active
ENSG00000134470.21	IL15RA	-0.963684	4.15159	-5.89123	3.64344754955827e-05	0.000825696	2.33486	Inactive-Active
ENSG00000184731.6	FAM110C	1.36605	4.85918	5.89007	3.65086269346908e-05	0.000826769	2.2202	Inactive-Active
ENSG00000198833.7	UBE2J1	-0.585112	7.60823	-5.88931	3.65577345349776e-05	0.000827273	2.05339	Inactive-Active
ENSG00000136261.15	BZW2	0.786692	5.28372	5.88881	3.65898258823087e-05	0.000827392	2.20825	Inactive-Active
ENSG00000187955.12	COL14A1	-1.99594	6.14368	-5.88715	3.66966716774815e-05	0.000828927	2.19707	Inactive-Active
ENSG00000106484.16	MEST	0.965116	4.52339	5.88692	3.67115009755239e-05	0.000828927	2.26885	Inactive-Active
ENSG00000169957.10	ZNF768	0.775836	5.41153	5.88626	3.67538452604288e-05	0.000829275	2.18205	Inactive-Active
ENSG00000150593.18	PDCD4	1.27568	8.22129	5.88584	3.67812541178005e-05	0.000829287	1.98755	Inactive-Active
ENSG00000165475.15	CRYL1	0.961978	5.86525	5.88419	3.68882681137545e-05	0.000830644	2.13773	Inactive-Active
ENSG00000224822.1	THRB-IT1	3.69454	-2.37607	5.88408	3.68953614391637e-05	0.000830644	2.11962	Inactive-Active
ENSG00000142959.5	BEST4	3.73192	4.99353	5.88297	3.69673852303677e-05	0.000831658	2.15626	Inactive-Active
ENSG00000148468.17	FAM171A1	0.708784	5.8962	5.88185	3.70399500689885e-05	0.000832556	2.13833	Inactive-Active
ENSG00000131238.18	PPT1	-0.878034	6.08048	-5.88152	3.70613145462789e-05	0.000832556	2.15546	Inactive-Active
ENSG00000211898.7	IGHD	-4.88087	1.37075	-5.87917	3.72148543839236e-05	0.000835144	2.49506	Inactive-Active
ENSG00000106384.12	MOGAT3	1.37195	5.06843	5.87871	3.72452170491901e-05	0.000835144	2.20427	Inactive-Active
ENSG00000008382.16	MPND	0.838325	3.92344	5.87852	3.72577938729567e-05	0.000835144	2.29677	Inactive-Active
ENSG00000005206.17	SPPL2B	0.742553	6.49923	5.87681	3.73702181830587e-05	0.000837055	2.09816	Inactive-Active
ENSG00000168899.5	VAMP5	-1.55527	3.793	-5.87639	3.73976758555627e-05	0.000837062	2.35382	Inactive-Active
ENSG00000161267.12	BDH1	1.48514	5.37279	5.87565	3.74465067597943e-05	0.000837546	2.14888	Inactive-Active
ENSG00000048471.14	SNX29	-1.11519	4.30897	-5.87472	3.75078159229891e-05	0.000838309	2.3064	Inactive-Active
ENSG00000109814.12	UGDH	1.38336	7.21221	5.87216	3.76768214783816e-05	0.00084102	2.01671	Inactive-Active
ENSG00000069122.19	ADGRF5	-1.83035	4.52679	-5.87206	3.76836649232326e-05	0.00084102	2.30685	Inactive-Active
ENSG00000211893.4	IGHG2	-3.87252	8.85368	-5.86962	3.78455539585645e-05	0.000843427	2.00548	Inactive-Active
ENSG00000204592.9	HLA-E	-0.820933	8.54147	-5.86927	3.7869304045492e-05	0.000843427	1.95931	Inactive-Active
ENSG00000196588.20	MRTFA	-0.62052	5.08847	-5.8692	3.78736387285267e-05	0.000843427	2.20248	Inactive-Active
ENSG00000277200.1	AC005696.4	2.20985	-0.0893667	5.86666	3.80437377190532e-05	0.000846604	2.46432	Inactive-Active
ENSG00000141959.17	PFKL	0.62697	8.17917	5.8645	3.81882513893787e-05	0.000848785	1.96309	Inactive-Active
ENSG00000038427.16	VCAN	-1.45864	6.00902	-5.86438	3.81968193752531e-05	0.000848785	2.16226	Inactive-Active
ENSG00000151276.23	MAGI1	0.926264	5.26935	5.86291	3.82953446562075e-05	0.000850361	2.1586	Inactive-Active
ENSG00000275025.1	AC002401.3	3.70056	-2.96014	5.8621	3.83502443088188e-05	0.000850522	2.02865	Inactive-Active
ENSG00000112759.19	SLC29A1	-1.21528	4.44918	-5.86199	3.83578164124505e-05	0.000850522	2.27332	Inactive-Active
ENSG00000184828.10	ZBTB7C	1.43969	5.40654	5.86142	3.83963004591354e-05	0.000850764	2.12371	Inactive-Active
ENSG00000255186.1	AC087277.2	2.65284	-1.28361	5.86072	3.84436162918021e-05	0.000851075	2.28845	Inactive-Active
ENSG00000025708.14	TYMP	-1.90948	5.65629	-5.8604	3.8465560213148e-05	0.000851075	2.15326	Inactive-Active
ENSG00000105063.19	PPP6R1	-0.734332	6.51171	-5.85962	3.85181965698131e-05	0.000851628	2.0718	Inactive-Active
ENSG00000095203.15	EPB41L4B	2.03931	7.03628	5.85836	3.86039493378506e-05	0.000852912	1.99415	Inactive-Active
ENSG00000184497.13	TMEM255B	-1.87166	2.46085	-5.85775	3.86453512177169e-05	0.000853215	2.45087	Inactive-Active
ENSG00000135046.14	ANXA1	-2.36578	6.37578	-5.85713	3.86873729853801e-05	0.000853532	2.10271	Inactive-Active
ENSG00000107518.18	ATRNL1	-2.75305	-1.3975	-5.85615	3.87542755538622e-05	0.000854189	2.10714	Inactive-Active
ENSG00000112304.11	ACOT13	0.914539	4.80075	5.85588	3.87726084140412e-05	0.000854189	2.17762	Inactive-Active
ENSG00000126882.13	FAM78A	-1.56376	3.86102	-5.85449	3.8868029473585e-05	0.000854616	2.32551	Inactive-Active
ENSG00000250602.6	AC093535.1	1.8038	-0.314918	5.85442	3.88724298271871e-05	0.000854616	2.42291	Inactive-Active
ENSG00000188511.12	C22orf34	-1.83675	0.915383	-5.85438	3.88751806397568e-05	0.000854616	2.4459	Inactive-Active
ENSG00000224051.7	CPTP	0.629431	5.47155	5.85326	3.89525257068736e-05	0.000854805	2.12119	Inactive-Active
ENSG00000258913.2	LINC02691	2.07368	-0.320634	5.85278	3.89855324421291e-05	0.000854805	2.34429	Inactive-Active
ENSG00000162434.13	JAK1	-0.678262	7.52766	-5.85266	3.89932354804828e-05	0.000854805	1.99057	Inactive-Active
ENSG00000163354.15	DCST2	1.45278	1.10597	5.85264	3.89947135638689e-05	0.000854805	2.46147	Inactive-Active
ENSG00000162618.15	ADGRL4	-2.10759	3.80284	-5.85022	3.91617763425056e-05	0.000857857	2.32879	Inactive-Active
ENSG00000266151.1	MIR3646	3.68875	-3.28091	5.84929	3.92255868970869e-05	0.000858645	1.80667	Inactive-Active
ENSG00000123352.18	SPATS2	-0.770128	5.16196	-5.84613	3.94450949623973e-05	0.000862049	2.17077	Inactive-Active
ENSG00000167191.12	GPRC5B	-1.44165	3.37268	-5.84602	3.94523946518778e-05	0.000862049	2.35383	Inactive-Active
ENSG00000101856.10	PGRMC1	0.633116	6.91606	5.84584	3.94650177540685e-05	0.000862049	2.00245	Inactive-Active
ENSG00000166265.13	CYYR1	-1.59123	3.95421	-5.84363	3.96189942698743e-05	0.0008648	2.30143	Inactive-Active
ENSG00000164038.16	SLC9B2	-1.66735	2.25326	-5.84253	3.96959559695872e-05	0.000865866	2.43521	Inactive-Active
ENSG00000127946.17	HIP1	-1.10427	4.51419	-5.84134	3.97798023937151e-05	0.000867082	2.24073	Inactive-Active
ENSG00000257845.1	LINC02294	3.21082	-4.53394	5.84006	3.9869735836703e-05	0.00086794	1.59258	Inactive-Active
ENSG00000100336.17	APOL4	-1.14422	3.24406	-5.83998	3.98755228046073e-05	0.00086794	2.35713	Inactive-Active
ENSG00000186918.14	ZNF395	0.686067	5.49238	5.83942	3.99147736098387e-05	0.000868182	2.1025	Inactive-Active
ENSG00000148584.15	A1CF	1.66068	5.56792	5.83589	4.01640644156479e-05	0.000872898	2.05825	Inactive-Active
ENSG00000063245.15	EPN1	0.565129	7.48837	5.83555	4.01882730312533e-05	0.000872898	1.94814	Inactive-Active
ENSG00000242498.8	ARPIN	0.91987	5.97236	5.83114	4.05025713979252e-05	0.000879105	2.04761	Inactive-Active
ENSG00000151834.16	GABRA2	1.9515	3.08568	5.82985	4.05942900593391e-05	0.000880476	2.32907	Inactive-Active
ENSG00000088367.23	EPB41L1	0.925815	5.41362	5.82897	4.06575184917847e-05	0.000881227	2.08875	Inactive-Active
ENSG00000198369.10	SPRED2	0.573612	5.57436	5.82821	4.07122965393043e-05	0.000881776	2.07315	Inactive-Active
ENSG00000244004.1	RPS3AP19	2.68397	-1.52008	5.82782	4.07400697085197e-05	0.000881776	2.24188	Inactive-Active
ENSG00000116852.15	KIF21B	-1.11469	4.42741	-5.82678	4.0815165871993e-05	0.000882782	2.19698	Inactive-Active
ENSG00000239523.6	MYLK-AS1	1.50959	-0.210351	5.8248	4.09582132104665e-05	0.000885255	2.35969	Inactive-Active
ENSG00000178935.5	ZNF552	0.853054	4.00582	5.8237	4.10377192417965e-05	0.000886351	2.19917	Inactive-Active
ENSG00000023445.16	BIRC3	-1.93503	6.78	-5.823	4.10889042623849e-05	0.000886836	1.9943	Inactive-Active
ENSG00000170827.9	CELP	4.44952	-1.4719	5.82232	4.11377823054103e-05	0.000887269	2.32571	Inactive-Active
ENSG00000116663.11	FBXO6	-1.26892	3.14559	-5.82131	4.12115802673829e-05	0.000888239	2.3082	Inactive-Active
ENSG00000287562.1	AL109615.4	1.25089	1.6146	5.82026	4.12883668903009e-05	0.000889272	2.40413	Inactive-Active
ENSG00000130052.13	STARD8	-1.40616	2.57958	-5.81974	4.1326329373967e-05	0.000889468	2.37754	Inactive-Active
ENSG00000047644.19	WWC3	-0.864587	4.95935	-5.81908	4.13745950228286e-05	0.000889514	2.14259	Inactive-Active
ENSG00000213445.10	SIPA1	-1.34492	5.48757	-5.81856	4.14127224653832e-05	0.000889514	2.10362	Inactive-Active
ENSG00000198712.1	MT-CO2	0.97507	12.8675	5.81852	4.14150132892066e-05	0.000889514	1.69034	Inactive-Active
ENSG00000162692.12	VCAM1	-1.38215	5.36032	-5.81743	4.14947986557649e-05	0.000890607	2.12614	Inactive-Active
ENSG00000130309.11	COLGALT1	-0.616897	6.55151	-5.81703	4.15244809878073e-05	0.000890624	2.00099	Inactive-Active
ENSG00000265096.2	C1QTNF1-AS1	3.14151	-1.42504	5.81638	4.15725732858471e-05	0.000891035	2.19162	Inactive-Active
ENSG00000160972.9	PPP1R16A	0.877879	5.27419	5.81461	4.17024840421682e-05	0.000892581	2.06351	Inactive-Active
ENSG00000106078.19	COBL	1.20353	5.44487	5.81461	4.17026063524251e-05	0.000892581	2.03865	Inactive-Active
ENSG00000079263.19	SP140	-2.08104	3.31688	-5.81367	4.17715878379347e-05	0.000893437	2.31301	Inactive-Active
ENSG00000101098.13	RIMS4	4.8678	-1.54609	5.81237	4.18677710615707e-05	0.000894873	2.26529	Inactive-Active
ENSG00000128791.12	TWSG1	-1.2955	5.68142	-5.81119	4.19552229721064e-05	0.000896121	2.07283	Inactive-Active
ENSG00000133315.12	MACROD1	1.42444	3.96926	5.81069	4.19924772993487e-05	0.000896295	2.18214	Inactive-Active
ENSG00000198909.8	MAP3K3	-0.95082	4.90196	-5.80975	4.20624462310255e-05	0.000897167	2.13061	Inactive-Active
ENSG00000153786.13	ZDHHC7	0.556488	6.59592	5.80908	4.21120207275213e-05	0.00089743	1.96036	Inactive-Active
ENSG00000137478.15	FCHSD2	-1.01079	4.70764	-5.80849	4.21560762042801e-05	0.00089743	2.14584	Inactive-Active
ENSG00000116171.19	SCP2	0.675729	7.49502	5.80803	4.2190423755192e-05	0.00089743	1.8935	Inactive-Active
ENSG00000108950.12	FAM20A	-2.5391	2.43029	-5.80802	4.21912196653342e-05	0.00089743	2.37465	Inactive-Active
ENSG00000117122.14	MFAP2	-2.30804	2.22208	-5.80749	4.22306985131251e-05	0.000897607	2.38072	Inactive-Active
ENSG00000054148.18	PHPT1	0.586436	5.98988	5.80676	4.22855012006441e-05	0.000897607	2.00465	Inactive-Active
ENSG00000278156.2	TSC22D1-AS1	1.39774	1.47611	5.80674	4.22869181425891e-05	0.000897607	2.38147	Inactive-Active
ENSG00000112208.11	BAG2	-1.44677	2.38177	-5.80514	4.24071615890866e-05	0.00089954	2.36089	Inactive-Active
ENSG00000152763.17	DNAI4	1.60981	3.02771	5.8046	4.2447323790683e-05	0.000899772	2.23979	Inactive-Active
ENSG00000176170.14	SPHK1	-2.89195	2.56283	-5.80289	4.25761899550925e-05	0.000901884	2.33981	Inactive-Active
ENSG00000114850.7	SSR3	-0.649862	7.17958	-5.80236	4.26159763982215e-05	0.000902106	1.92269	Inactive-Active
ENSG00000050426.16	LETMD1	0.70262	5.86231	5.80187	4.2653139461277e-05	0.000902273	2.01285	Inactive-Active
ENSG00000123178.15	SPRYD7	0.841489	4.35921	5.80143	4.26858034001831e-05	0.000902345	2.1207	Inactive-Active
ENSG00000152749.8	GPR180	-0.78458	4.07087	-5.79999	4.27949468614291e-05	0.000904032	2.18607	Inactive-Active
ENSG00000073146.16	MOV10L1	-2.37337	-0.811712	-5.79951	4.2831693635513e-05	0.000904189	2.13245	Inactive-Active
ENSG00000163739.5	CXCL1	-4.32975	4.87674	-5.79878	4.28864331381251e-05	0.000904725	2.15697	Inactive-Active
ENSG00000140092.15	FBLN5	-1.3332	3.98129	-5.79821	4.29304235860521e-05	0.000905011	2.20854	Inactive-Active
ENSG00000244694.8	PTCHD4	-3.87857	-2.2265	-5.79783	4.29587533632412e-05	0.000905011	1.79411	Inactive-Active
ENSG00000286346.1	AC021613.3	4.94091	-2.23035	5.79658	4.30538844214864e-05	0.000906396	2.17281	Inactive-Active
ENSG00000125744.12	RTN2	-1.46936	2.07794	-5.79533	4.31497280337323e-05	0.000907794	2.34831	Inactive-Active
ENSG00000131899.11	LLGL1	-0.831769	4.01249	-5.79377	4.32688047823538e-05	0.000908775	2.17999	Inactive-Active
ENSG00000159840.16	ZYX	-1.34127	5.5035	-5.79377	4.32691265025896e-05	0.000908775	2.04567	Inactive-Active
ENSG00000143337.19	TOR1AIP1	-0.653681	5.55418	-5.79334	4.33021136248276e-05	0.000908775	2.03265	Inactive-Active
ENSG00000119431.9	HDHD3	1.24316	6.21584	5.79318	4.33143241637019e-05	0.000908775	1.94364	Inactive-Active
ENSG00000161091.13	MFSD12	-0.747808	5.10713	-5.79271	4.3350135886731e-05	0.000908908	2.0689	Inactive-Active
ENSG00000273179.1	AC092535.5	-1.92231	1.03901	-5.79012	4.35497875231586e-05	0.000911892	2.34362	Inactive-Active
ENSG00000152785.8	BMP3	4.52369	3.95157	5.79009	4.35516205434945e-05	0.000911892	2.10459	Inactive-Active
ENSG00000100014.20	SPECC1L	0.750819	5.32306	5.789	4.36360078581086e-05	0.000913038	2.02482	Inactive-Active
ENSG00000137573.14	SULF1	-1.9339	5.53914	-5.7874	4.37595106096343e-05	0.000915001	2.0709	Inactive-Active
ENSG00000165914.15	TTC7B	-1.29909	2.40357	-5.78606	4.38640276485913e-05	0.000916565	2.32464	Inactive-Active
ENSG00000287401.1	AC034139.1	1.90287	-0.849948	5.78525	4.39265882519214e-05	0.00091725	2.25389	Inactive-Active
ENSG00000103569.10	AQP9	-7.38764	-0.709427	-5.78388	4.40337729600813e-05	0.000918866	2.12839	Inactive-Active
ENSG00000198795.11	ZNF521	-1.49841	2.79816	-5.78323	4.40846678390041e-05	0.000919306	2.29974	Inactive-Active
ENSG00000175348.11	TMEM9B	0.607537	6.307	5.78249	4.41420040518983e-05	0.000919776	1.92834	Inactive-Active
ENSG00000211892.4	IGHG4	-5.03439	5.34826	-5.78213	4.41703605032131e-05	0.000919776	2.14019	Inactive-Active
ENSG00000288568.1	AC092720.3	2.74935	-1.63407	5.78164	4.42087074602238e-05	0.000919776	2.10879	Inactive-Active
ENSG00000136531.18	SCN2A	-3.48407	-2.3071	-5.78141	4.42266118288796e-05	0.000919776	1.77477	Inactive-Active
ENSG00000107672.15	NSMCE4A	0.640325	5.11187	5.77982	4.43513769162478e-05	0.000921423	2.03657	Inactive-Active
ENSG00000147251.16	DOCK11	-1.42406	4.28289	-5.77964	4.43655739024498e-05	0.000921423	2.1455	Inactive-Active
ENSG00000176209.12	SMIM19	0.726838	3.81698	5.77814	4.44836828269591e-05	0.000923254	2.14576	Inactive-Active
ENSG00000156411.10	ATP5MPL	0.657473	5.22601	5.77747	4.4536673205278e-05	0.000923731	2.0055	Inactive-Active
ENSG00000278989.1	AP001148.1	1.48366	0.789117	5.77672	4.45960432671199e-05	0.00092419	2.33388	Inactive-Active
ENSG00000241224.8	C3orf85	1.88985	2.99632	5.77643	4.46187786021344e-05	0.00092419	2.18952	Inactive-Active
ENSG00000255398.3	HCAR3	-6.66072	-2.53809	-5.7759	4.46607010171548e-05	0.000924311	1.7443	Inactive-Active
ENSG00000110723.12	EXPH5	2.5372	4.49108	5.77544	4.46971580980172e-05	0.000924311	2.03154	Inactive-Active
ENSG00000197943.10	PLCG2	-1.34844	5.56428	-5.77522	4.47145870748433e-05	0.000924311	2.02803	Inactive-Active
ENSG00000158109.15	TPRG1L	0.703924	6.41674	5.77409	4.48046893850737e-05	0.000925553	1.90861	Inactive-Active
ENSG00000047936.11	ROS1	2.26395	0.442361	5.77175	4.49906148402878e-05	0.00092845	2.32144	Inactive-Active
ENSG00000184922.14	FMNL1	-1.75551	5.09282	-5.77157	4.50051901594045e-05	0.00092845	2.06267	Inactive-Active
ENSG00000241388.5	HNF1A-AS1	2.53489	4.90992	5.77065	4.50785443413718e-05	0.000928827	2.0078	Inactive-Active
ENSG00000211800.3	TRAV20	-3.51244	-3.19577	-5.77053	4.50879484852549e-05	0.000928827	1.57308	Inactive-Active
ENSG00000213801.4	ZNF321P	1.51436	1.93811	5.77021	4.51138634451289e-05	0.000928827	2.29758	Inactive-Active
ENSG00000161405.17	IKZF3	-1.83245	4.93582	-5.76644	4.54165165578243e-05	0.00093439	2.06861	Inactive-Active
ENSG00000253883.1	IGHV3-19	-2.38171	-1.37592	-5.76604	4.54489162573343e-05	0.00093439	1.98225	Inactive-Active
ENSG00000280000.1	AC009135.2	3.55586	-4.14937	5.76552	4.54906070452253e-05	0.00093439	1.52327	Inactive-Active
ENSG00000138162.19	TACC2	0.812621	5.96482	5.76534	4.55053406279636e-05	0.00093439	1.91748	Inactive-Active
ENSG00000089692.9	LAG3	-1.48182	2.87382	-5.76316	4.56818277241266e-05	0.00093739	2.26286	Inactive-Active
ENSG00000131069.20	ACSS2	1.44961	7.44038	5.76242	4.57422872412693e-05	0.000937534	1.80501	Inactive-Active
ENSG00000109610.6	SOD3	-1.1637	6.02881	-5.76232	4.5749694519185e-05	0.000937534	1.93606	Inactive-Active
ENSG00000186115.13	CYP4F2	3.46646	0.907652	5.76096	4.58608576985578e-05	0.000938552	2.3045	Inactive-Active
ENSG00000279418.1	LINC00244	3.48641	-3.9235	5.76074	4.58787143737589e-05	0.000938552	1.58864	Inactive-Active
ENSG00000197912.16	SPG7	0.651804	7.00197	5.76059	4.58907098204392e-05	0.000938552	1.85734	Inactive-Active
ENSG00000084754.12	HADHA	0.716938	7.99395	5.758	4.61020335889459e-05	0.000942249	1.77389	Inactive-Active
ENSG00000068912.14	ERLEC1	-0.766691	6.64723	-5.75702	4.61823613538506e-05	0.000943265	1.87906	Inactive-Active
ENSG00000129009.13	ISLR	-2.16388	0.990876	-5.75586	4.62775715256053e-05	0.000944226	2.27478	Inactive-Active
ENSG00000072952.19	IRAG1	-1.39389	4.77673	-5.7557	4.62906823249423e-05	0.000944226	2.06072	Inactive-Active
ENSG00000154736.6	ADAMTS5	-1.78823	2.87458	-5.75391	4.64385922065496e-05	0.000946616	2.23903	Inactive-Active
ENSG00000102024.18	PLS3	-1.2513	5.59524	-5.75344	4.64767117661922e-05	0.000946767	1.97592	Inactive-Active
ENSG00000135437.10	RDH5	0.852528	2.46273	5.75207	4.65906601495715e-05	0.000948462	2.23177	Inactive-Active
ENSG00000198886.2	MT-ND4	1.18002	13.719	5.74999	4.67625544915155e-05	0.000951332	1.54253	Inactive-Active
ENSG00000122420.10	PTGFR	-2.34118	2.8099	-5.74933	4.68175265703367e-05	0.000951823	2.25824	Inactive-Active
ENSG00000187398.12	LUZP2	2.03511	0.930926	5.74766	4.69564980689958e-05	0.000953594	2.28668	Inactive-Active
ENSG00000187630.17	DHRS4L2	1.33133	2.48292	5.74743	4.69757724152667e-05	0.000953594	2.20777	Inactive-Active
ENSG00000137033.11	IL33	-1.76917	3.66578	-5.74717	4.69974958137354e-05	0.000953594	2.15509	Inactive-Active
ENSG00000110811.20	P3H3	-1.50556	3.42385	-5.74563	4.71263605304786e-05	0.000955509	2.19123	Inactive-Active
ENSG00000166401.15	SERPINB8	-1.36135	3.72011	-5.7453	4.71538441123045e-05	0.000955509	2.10799	Inactive-Active
ENSG00000128656.15	CHN1	-2.37348	3.00646	-5.74304	4.73443567345671e-05	0.000958353	2.23711	Inactive-Active
ENSG00000197506.8	SLC28A3	-2.27829	2.09505	-5.7427	4.73725632380016e-05	0.000958353	2.25527	Inactive-Active
ENSG00000144369.13	FAM171B	-1.11649	2.87612	-5.74252	4.73874784119951e-05	0.000958353	2.23245	Inactive-Active
ENSG00000106031.9	HOXA13	1.25436	5.50175	5.7392	4.76687656353565e-05	0.000963409	1.92198	Inactive-Active
ENSG00000168118.12	RAB4A	0.614178	5.19877	5.73657	4.78921036222878e-05	0.000967136	1.93245	Inactive-Active
ENSG00000228742.11	LINC02577	-4.90307	-1.54202	-5.73629	4.7915924785371e-05	0.000967136	1.86144	Inactive-Active
ENSG00000249453.1	AC092834.1	3.87004	0.679105	5.73563	4.79720494305466e-05	0.000967319	2.26662	Inactive-Active
ENSG00000218048.2	AL121949.1	4.39575	-2.31837	5.73545	4.79877618905158e-05	0.000967319	1.95926	Inactive-Active
ENSG00000110955.9	ATP5F1B	0.848107	9.42358	5.73324	4.8176312109277e-05	0.000970485	1.65157	Inactive-Active
ENSG00000144045.14	DQX1	1.12565	4.64077	5.72989	4.8464574905848e-05	0.000975654	1.96906	Inactive-Active
ENSG00000186687.16	LYRM7	0.732672	5.03956	5.72827	4.86046433790285e-05	0.000977835	1.94151	Inactive-Active
ENSG00000197142.10	ACSL5	1.02096	7.62668	5.72741	4.86784897815549e-05	0.00097837	1.73496	Inactive-Active
ENSG00000189233.12	NUGGC	-1.55797	3.14007	-5.72723	4.86946930089745e-05	0.00097837	2.18552	Inactive-Active
ENSG00000129680.16	MAP7D3	-1.07521	3.20148	-5.72682	4.87301304797166e-05	0.000978444	2.15785	Inactive-Active
ENSG00000102226.10	USP11	-0.750325	5.0827	-5.72602	4.87998048450806e-05	0.000978882	1.95701	Inactive-Active
ENSG00000198695.2	MT-ND6	0.825242	11.4272	5.72583	4.8815482403982e-05	0.000978882	1.56591	Inactive-Active
ENSG00000272933.1	AL391121.1	-1.24348	2.78208	-5.7254	4.88534235330625e-05	0.000979006	2.18334	Inactive-Active
ENSG00000115525.18	ST3GAL5	-1.39305	3.66996	-5.72399	4.89762271397456e-05	0.000979928	2.11413	Inactive-Active
ENSG00000106560.11	GIMAP2	-0.989084	3.91541	-5.72399	4.89762829256639e-05	0.000979928	2.0797	Inactive-Active
ENSG00000176788.9	BASP1	-2.39311	4.81749	-5.72361	4.90093677352111e-05	0.000979928	2.00566	Inactive-Active
ENSG00000257859.2	CASC18	4.44111	-3.57165	5.72272	4.90866889118408e-05	0.000979928	1.72152	Inactive-Active
ENSG00000148985.20	PGAP2	0.672713	4.42359	5.72268	4.90900407263891e-05	0.000979928	1.99274	Inactive-Active
ENSG00000122679.8	RAMP3	-2.53125	3.38746	-5.72256	4.91008483892493e-05	0.000979928	2.1431	Inactive-Active
ENSG00000147443.13	DOK2	-1.27968	3.83525	-5.72232	4.91220054995238e-05	0.000979928	2.0853	Inactive-Active
ENSG00000169129.15	AFAP1L2	-0.894949	4.72929	-5.72039	4.92911247343932e-05	0.000982044	1.97356	Inactive-Active
ENSG00000153721.19	CNKSR3	1.25714	3.99102	5.71982	4.93414995514143e-05	0.000982044	2.00755	Inactive-Active
ENSG00000071282.12	LMCD1	-1.5636	3.32518	-5.71978	4.93447235347972e-05	0.000982044	2.14104	Inactive-Active
ENSG00000184602.6	SNN	-1.72249	4.10508	-5.71946	4.93723179044205e-05	0.000982044	2.05659	Inactive-Active
ENSG00000073849.16	ST6GAL1	-0.956501	7.03113	-5.71906	4.94081479026518e-05	0.000982044	1.79313	Inactive-Active
ENSG00000168237.18	GLYCTK	1.2553	4.58126	5.71893	4.94192181231011e-05	0.000982044	1.9592	Inactive-Active
ENSG00000118777.12	ABCG2	3.06656	5.27952	5.7176	4.9536107638221e-05	0.000983732	1.88277	Inactive-Active
ENSG00000101194.18	SLC17A9	-1.50897	5.48443	-5.71537	4.97341005276471e-05	0.000987028	1.91365	Inactive-Active
ENSG00000281406.2	BLACAT1	-2.73503	-0.673036	-5.71445	4.98152364602261e-05	0.000988002	2.06423	Inactive-Active
ENSG00000166165.13	CKB	2.57694	8.99038	5.71383	4.98705674091165e-05	0.000988464	1.63374	Inactive-Active
ENSG00000106571.15	GLI3	-1.72303	2.64784	-5.71327	4.99204600855455e-05	0.000988817	2.20053	Inactive-Active
ENSG00000197183.14	NOL4L	0.755861	6.18077	5.71222	5.00133187463279e-05	0.000989973	1.81389	Inactive-Active
ENSG00000176971.4	FIBIN	-3.90288	1.90784	-5.71172	5.0058471464691e-05	0.000989973	2.22492	Inactive-Active
ENSG00000146555.19	SDK1	-2.07945	3.58124	-5.71153	5.00752097083319e-05	0.000989973	2.13434	Inactive-Active
ENSG00000081791.9	DELE1	0.48784	5.99279	5.71061	5.01575798361154e-05	0.000990769	1.83766	Inactive-Active
ENSG00000173221.14	GLRX	-1.11761	5.78516	-5.71036	5.0179751419434e-05	0.000990769	1.84643	Inactive-Active
ENSG00000051523.11	CYBA	-0.860837	8.14894	-5.70845	5.03503903913693e-05	0.000993502	1.68768	Inactive-Active
ENSG00000197013.10	ZNF429	0.769276	4.39878	5.70546	5.06199116766781e-05	0.000998181	1.97479	Inactive-Active
ENSG00000255135.4	AP002360.1	1.38863	1.87004	5.70447	5.07094939486737e-05	0.000999308	2.18429	Inactive-Active
ENSG00000196660.11	SLC30A10	3.84521	4.43765	5.70371	5.07782808765304e-05	0.00100002	1.90298	Inactive-Active
ENSG00000151150.22	ANK3	1.55896	5.28014	5.70125	5.10013512479991e-05	0.00100278	1.85739	Inactive-Active
ENSG00000171658.8	NMRAL2P	1.66815	2.49941	5.70074	5.10477203171182e-05	0.00100278	2.1113	Inactive-Active
ENSG00000099624.8	ATP5F1D	0.640594	5.92298	5.70064	5.10569470927949e-05	0.00100278	1.80642	Inactive-Active
ENSG00000133135.14	RNF128	0.881453	5.5272	5.70057	5.1063127861972e-05	0.00100278	1.83917	Inactive-Active
ENSG00000010438.17	PRSS3	0.989992	5.92934	5.70038	5.10806565445725e-05	0.00100278	1.79587	Inactive-Active
ENSG00000250073.3	AP000866.2	1.35282	1.5139	5.69939	5.11711732706013e-05	0.00100391	2.1921	Inactive-Active
ENSG00000197457.10	STMN3	-1.40281	3.5178	-5.69771	5.13246480105235e-05	0.00100595	2.08485	Inactive-Active
ENSG00000126785.13	RHOJ	-1.57352	3.44793	-5.69747	5.13462105593521e-05	0.00100595	2.10594	Inactive-Active
ENSG00000223547.10	ZNF844	0.841132	3.14325	5.69718	5.13726899599115e-05	0.00100595	2.06893	Inactive-Active
ENSG00000237289.10	CKMT1B	1.35819	4.96897	5.69675	5.14119717986167e-05	0.00100608	1.87122	Inactive-Active
ENSG00000012232.9	EXTL3	-0.900326	4.91912	-5.69632	5.14521290624828e-05	0.00100622	1.91491	Inactive-Active
ENSG00000171867.18	PRNP	-1.0649	5.92657	-5.69508	5.15656566007539e-05	0.0010073	1.8392	Inactive-Active
ENSG00000197448.14	GSTK1	0.553905	7.38954	5.69501	5.15725819238336e-05	0.0010073	1.7015	Inactive-Active
ENSG00000077232.19	DNAJC10	-0.593796	6.93535	-5.6937	5.16927650596639e-05	0.00100837	1.74375	Inactive-Active
ENSG00000153976.3	HS3ST3A1	-2.13216	1.05195	-5.6937	5.16930707880486e-05	0.00100837	2.18464	Inactive-Active
ENSG00000264176.1	MAGOH2P	1.79629	0.210844	5.69307	5.17510007113889e-05	0.00100887	2.17049	Inactive-Active
ENSG00000060971.19	ACAA1	0.891991	6.22205	5.69224	5.18281401014869e-05	0.00100954	1.76995	Inactive-Active
ENSG00000267934.1	AC010300.1	1.38516	1.7285	5.69199	5.18509630906655e-05	0.00100954	2.17572	Inactive-Active
ENSG00000115425.14	PECR	1.0291	3.68586	5.69153	5.18939650079806e-05	0.00100974	1.98897	Inactive-Active
ENSG00000059377.18	TBXAS1	-1.27968	4.28581	-5.68973	5.20601742873493e-05	0.00101195	1.97299	Inactive-Active
ENSG00000117114.20	ADGRL2	-1.6494	4.85301	-5.68945	5.20860815161943e-05	0.00101195	1.93839	Inactive-Active
ENSG00000175066.16	GK5	0.988578	5.86213	5.68924	5.21060871722621e-05	0.00101195	1.79926	Inactive-Active
ENSG00000173269.14	MMRN2	-1.57847	4.14658	-5.68808	5.22144518326815e-05	0.00101283	2.00821	Inactive-Active
ENSG00000231292.6	IGKV1OR2-108	-3.54656	-2.97182	-5.68804	5.22173711901601e-05	0.00101283	1.54448	Inactive-Active
ENSG00000164488.12	DACT2	2.55414	0.633041	5.68746	5.22722784949296e-05	0.00101326	2.18522	Inactive-Active
ENSG00000163644.15	PPM1K	-1.13357	4.74662	-5.6871	5.23051467998862e-05	0.00101326	1.93703	Inactive-Active
ENSG00000136378.15	ADAMTS7	-1.39741	3.49496	-5.68656	5.23559525398675e-05	0.00101361	2.07786	Inactive-Active
ENSG00000113742.14	CPEB4	-0.982272	5.77402	-5.68591	5.24169955562383e-05	0.00101415	1.82283	Inactive-Active
ENSG00000172273.13	HINFP	0.643716	4.64368	5.68414	5.25824150661202e-05	0.00101671	1.89592	Inactive-Active
ENSG00000138185.20	ENTPD1	-1.43655	5.13821	-5.68326	5.26655155441297e-05	0.00101768	1.89044	Inactive-Active
ENSG00000092421.17	SEMA6A	1.12234	5.93375	5.68275	5.2713681429084e-05	0.00101795	1.76852	Inactive-Active
ENSG00000189221.10	MAOA	1.73176	7.77246	5.68241	5.27451703593417e-05	0.00101795	1.63496	Inactive-Active
ENSG00000225953.3	SATB2-AS1	3.47914	4.43708	5.68139	5.28413902846572e-05	0.00101916	1.84844	Inactive-Active
ENSG00000204301.6	NOTCH4	-1.77298	2.62835	-5.6804	5.29348698418536e-05	0.00101975	2.13462	Inactive-Active
ENSG00000144852.20	NR1I2	1.63342	5.31685	5.68005	5.2968251012503e-05	0.00101975	1.80401	Inactive-Active
ENSG00000100412.17	ACO2	0.809909	6.79155	5.6795	5.30205501045079e-05	0.00101975	1.70008	Inactive-Active
ENSG00000169403.12	PTAFR	-2.06999	4.36823	-5.6794	5.30297413770446e-05	0.00101975	1.95593	Inactive-Active
ENSG00000105270.15	CLIP3	-1.35353	3.25882	-5.67927	5.30424790187538e-05	0.00101975	2.08192	Inactive-Active
ENSG00000278857.1	IGKV1D-12	-1.99226	3.36696	-5.67891	5.30762744753874e-05	0.00101975	2.10255	Inactive-Active
ENSG00000115165.10	CYTIP	-1.73048	4.28949	-5.67831	5.31328567169053e-05	0.00101975	1.96529	Inactive-Active
ENSG00000119042.17	SATB2	2.13297	6.64278	5.67827	5.31365588286519e-05	0.00101975	1.69458	Inactive-Active
ENSG00000007312.13	CD79B	-3.11962	2.25823	-5.67781	5.31805757817123e-05	0.00101996	2.16065	Inactive-Active
ENSG00000264522.6	OTUD7B	0.623333	5.40219	5.67673	5.32833971614392e-05	0.00102116	1.81178	Inactive-Active
ENSG00000139973.16	SYT16	-3.78281	-3.20457	-5.67646	5.33093304212786e-05	0.00102116	1.43479	Inactive-Active
ENSG00000164430.17	CGAS	-1.06604	3.15993	-5.67525	5.34248041024366e-05	0.00102274	2.07612	Inactive-Active
ENSG00000174059.17	CD34	-1.84199	4.69853	-5.67304	5.36358755821863e-05	0.00102589	1.92033	Inactive-Active
ENSG00000143627.19	PKLR	3.28299	-2.59088	5.67283	5.36559442313055e-05	0.00102589	1.83336	Inactive-Active
ENSG00000196268.12	ZNF493	0.767548	4.1131	5.67042	5.3887526599156e-05	0.00102919	1.93749	Inactive-Active
ENSG00000162415.7	ZSWIM5	1.36008	3.83975	5.6702	5.39093103485854e-05	0.00102919	1.92641	Inactive-Active
ENSG00000147649.10	MTDH	-0.55339	7.44766	-5.66976	5.39512088135081e-05	0.00102919	1.66066	Inactive-Active
ENSG00000131831.18	RAI2	-1.53947	3.05882	-5.66964	5.39623894144381e-05	0.00102919	2.0874	Inactive-Active
ENSG00000159871.15	LYPD5	-2.67782	1.05467	-5.66902	5.40224597292457e-05	0.0010297	2.15375	Inactive-Active
ENSG00000178694.10	NSUN3	0.711077	4.35178	5.66737	5.41825725671935e-05	0.00103094	1.8867	Inactive-Active
ENSG00000148541.13	FAM13C	-1.872	1.49112	-5.66734	5.41855109969334e-05	0.00103094	2.1516	Inactive-Active
ENSG00000005249.13	PRKAR2B	-1.15918	3.56765	-5.66731	5.41879515595278e-05	0.00103094	2.00629	Inactive-Active
ENSG00000147799.11	ARHGAP39	0.958079	3.51936	5.66599	5.43157491208517e-05	0.00103274	1.96792	Inactive-Active
ENSG00000257512.1	AC124947.2	1.87057	0.395504	5.66417	5.44937402502902e-05	0.00103455	2.14581	Inactive-Active
ENSG00000129451.12	KLK10	-4.93446	1.09589	-5.66413	5.44968839240071e-05	0.00103455	2.07966	Inactive-Active
ENSG00000235481.3	UBE2R2-AS1	1.67395	1.28756	5.66386	5.4523033967879e-05	0.00103455	2.13729	Inactive-Active
ENSG00000162645.13	GBP2	-1.1175	6.37462	-5.66363	5.45454831735365e-05	0.00103455	1.72626	Inactive-Active
ENSG00000145779.8	TNFAIP8	-1.39834	5.09799	-5.66234	5.46723351051908e-05	0.00103632	1.85011	Inactive-Active
ENSG00000136828.19	RALGPS1	1.13634	4.93096	5.66145	5.4758924088326e-05	0.00103718	1.82541	Inactive-Active
ENSG00000096968.14	JAK2	-0.814055	5.29698	-5.66075	5.48275950349837e-05	0.00103718	1.80912	Inactive-Active
ENSG00000128394.17	APOBEC3F	-0.985536	2.75575	-5.66069	5.48331457220892e-05	0.00103718	2.08002	Inactive-Active
ENSG00000073792.16	IGF2BP2	0.830698	5.4367	5.6605	5.48525277745134e-05	0.00103718	1.77311	Inactive-Active
ENSG00000172667.11	ZMAT3	-0.834681	4.93571	-5.65995	5.49057760164809e-05	0.00103755	1.85049	Inactive-Active
ENSG00000259087.5	AL121790.2	3.01734	0.980963	5.65743	5.51545568799949e-05	0.00104162	2.12512	Inactive-Active
ENSG00000087245.13	MMP2	-2.32812	7.77201	-5.65662	5.52346230105586e-05	0.0010418	1.66479	Inactive-Active
ENSG00000172890.13	NADSYN1	0.665951	6.74385	5.65655	5.52416486326338e-05	0.0010418	1.6735	Inactive-Active
ENSG00000102802.10	MEDAG	-4.95147	-0.420144	-5.65625	5.52710567107252e-05	0.0010418	1.9314	Inactive-Active
ENSG00000147689.16	FAM83A	-4.95255	-0.809374	-5.65596	5.52994708692758e-05	0.0010418	1.97504	Inactive-Active
ENSG00000088826.18	SMOX	-2.09891	3.30784	-5.65537	5.53576403392332e-05	0.00104225	2.04369	Inactive-Active
ENSG00000133069.17	TMCC2	-1.53634	0.940014	-5.65491	5.54035752480645e-05	0.00104225	2.12398	Inactive-Active
ENSG00000232216.1	IGHV3-43	-2.52234	4.37274	-5.65449	5.54450678194639e-05	0.00104225	1.97499	Inactive-Active
ENSG00000255559.1	ZNF252P-AS1	1.46914	0.283546	5.65436	5.54585420302367e-05	0.00104225	2.11286	Inactive-Active
ENSG00000278912.1	AC008870.5	1.62661	1.78239	5.65243	5.5650444648645e-05	0.00104522	2.10121	Inactive-Active
ENSG00000183018.9	SPNS2	-2.2835	4.69646	-5.65166	5.57267481406454e-05	0.00104577	1.86367	Inactive-Active
ENSG00000149091.15	DGKZ	-0.551807	6.08455	-5.65145	5.57474870509284e-05	0.00104577	1.72745	Inactive-Active
ENSG00000198478.8	SH3BGRL2	1.30115	7.24392	5.65083	5.58098836398558e-05	0.0010463	1.61133	Inactive-Active
ENSG00000267107.8	PCAT19	-2.47016	1.17375	-5.64735	5.61582569348261e-05	0.00105219	2.11585	Inactive-Active
ENSG00000151553.15	FAM160B1	-0.616038	4.83885	-5.64588	5.63070532499543e-05	0.00105429	1.83191	Inactive-Active
ENSG00000196757.8	ZNF700	0.798576	4.55041	5.64556	5.63388307863758e-05	0.00105429	1.84884	Inactive-Active
ENSG00000136052.9	SLC41A2	0.74929	5.61861	5.64288	5.661002657641e-05	0.00105733	1.72415	Inactive-Active
ENSG00000182199.11	SHMT2	-0.612596	5.74935	-5.64273	5.66251850734991e-05	0.00105733	1.73991	Inactive-Active
ENSG00000231437.3	LINC01750	-3.06736	-0.89602	-5.64257	5.664150926899e-05	0.00105733	1.94018	Inactive-Active
ENSG00000211595.2	IGKJ3	-1.76035	1.53623	-5.64221	5.6677791591113e-05	0.00105733	2.1086	Inactive-Active
ENSG00000149201.10	CCDC81	-2.1434	-1.82463	-5.64214	5.66852931043819e-05	0.00105733	1.81288	Inactive-Active
ENSG00000095209.12	TMEM38B	1.06119	4.00912	5.64192	5.67072259091687e-05	0.00105733	1.8658	Inactive-Active
ENSG00000153790.12	C7orf31	1.17933	3.52949	5.64025	5.68769902709165e-05	0.00105959	1.91179	Inactive-Active
ENSG00000134193.15	REG4	-4.28322	7.0617	-5.64006	5.68970683678736e-05	0.00105959	1.66269	Inactive-Active
ENSG00000168229.4	PTGDR	1.8379	3.9622	5.63838	5.70687223685637e-05	0.00106215	1.87207	Inactive-Active
ENSG00000010318.21	PHF7	1.29538	3.22711	5.63802	5.71055028155149e-05	0.00106219	1.94837	Inactive-Active
ENSG00000163701.19	IL17RE	1.12553	5.83341	5.63631	5.72805394808257e-05	0.0010648	1.69092	Inactive-Active
ENSG00000185155.12	MIXL1	-2.27878	1.04137	-5.63555	5.73586966649021e-05	0.00106561	2.08676	Inactive-Active
ENSG00000121057.13	AKAP1	1.2232	7.11525	5.63411	5.75070879878084e-05	0.00106773	1.59552	Inactive-Active
ENSG00000196700.9	ZNF512B	-1.28354	3.49956	-5.63328	5.75923525526595e-05	0.00106867	1.98052	Inactive-Active
ENSG00000140254.12	DUOXA1	-4.06344	-0.707596	-5.63124	5.78033512216874e-05	0.00107098	1.98768	Inactive-Active
ENSG00000117215.15	PLA2G2D	-3.64393	2.00655	-5.63113	5.78152501699193e-05	0.00107098	2.08498	Inactive-Active
ENSG00000105559.12	PLEKHA4	-1.28592	4.1959	-5.63107	5.78215241247816e-05	0.00107098	1.89364	Inactive-Active
ENSG00000080293.10	SCTR	2.66095	-0.667173	5.63019	5.79127163542159e-05	0.00107196	2.04507	Inactive-Active
ENSG00000253313.6	C1orf210	1.34732	5.06517	5.62989	5.7943727806966e-05	0.00107196	1.72942	Inactive-Active
ENSG00000175084.12	DES	-4.25112	4.04977	-5.62929	5.80057093936629e-05	0.00107219	1.86358	Inactive-Active
ENSG00000011465.18	DCN	-1.77132	8.02474	-5.62825	5.81138083566659e-05	0.00107219	1.58098	Inactive-Active
ENSG00000277972.2	CISD3	0.921126	5.7316	5.62822	5.81175184545213e-05	0.00107219	1.6872	Inactive-Active
ENSG00000205890.3	AC108134.1	1.46053	3.4452	5.6282	5.81189033758959e-05	0.00107219	1.91119	Inactive-Active
ENSG00000251322.9	SHANK3	-1.729	2.42104	-5.628	5.81399323300045e-05	0.00107219	2.05601	Inactive-Active
ENSG00000182271.13	TMIGD1	4.16841	5.00046	5.62776	5.8164798293374e-05	0.00107219	1.70528	Inactive-Active
ENSG00000137266.15	SLC22A23	1.30848	6.02948	5.62692	5.82527906814071e-05	0.00107317	1.65702	Inactive-Active
ENSG00000225614.4	ZNF469	-2.38087	2.14542	-5.62621	5.83270996762365e-05	0.00107389	2.07077	Inactive-Active
ENSG00000186998.16	EMID1	-1.34698	4.37498	-5.62364	5.85964112219469e-05	0.00107821	1.86726	Inactive-Active
ENSG00000277740.1	Metazoa_SRP	-2.8897	-4.55529	-5.6217	5.88009577860828e-05	0.00108045	1.19739	Inactive-Active
ENSG00000178860.9	MSC	-2.21128	2.32861	-5.62159	5.8812278078796e-05	0.00108045	2.05095	Inactive-Active
ENSG00000000938.13	FGR	-2.50599	3.25324	-5.62141	5.88315085504637e-05	0.00108045	1.98322	Inactive-Active
ENSG00000211943.2	IGHV3-15	-2.42037	6.97068	-5.62116	5.88585952199464e-05	0.00108045	1.64519	Inactive-Active
ENSG00000166886.13	NAB2	-1.48623	3.71375	-5.6199	5.89908463688787e-05	0.00108179	1.92893	Inactive-Active
ENSG00000243531.1	AC079804.2	5.34406	-2.52451	5.61973	5.900953964346e-05	0.00108179	1.75238	Inactive-Active
ENSG00000167552.15	TUBA1A	-1.23632	5.64258	-5.61947	5.90364903400743e-05	0.00108179	1.73022	Inactive-Active
ENSG00000113722.17	CDX1	1.2466	7.33016	5.61855	5.9133918358381e-05	0.00108264	1.55028	Inactive-Active
ENSG00000149927.18	DOC2A	2.15832	2.06289	5.61816	5.91758999844915e-05	0.00108264	2.01211	Inactive-Active
ENSG00000200052.1	Y_RNA	2.8701	-4.96658	5.61804	5.91885158711908e-05	0.00108264	1.17297	Inactive-Active
ENSG00000165410.15	CFL2	-1.09383	3.87176	-5.61657	5.93450447664142e-05	0.00108486	1.8914	Inactive-Active
ENSG00000112874.10	NUDT12	1.055	4.95173	5.61624	5.93805816660821e-05	0.00108487	1.73063	Inactive-Active
ENSG00000287097.1	AL590550.1	-3.76443	-4.11461	-5.61559	5.94496353896384e-05	0.00108548	1.27525	Inactive-Active
ENSG00000080493.18	SLC4A4	2.246	7.24931	5.61476	5.95375750591736e-05	0.00108645	1.53438	Inactive-Active
ENSG00000115665.9	SLC5A7	3.27246	-2.18311	5.61375	5.96457244399268e-05	0.00108732	1.78452	Inactive-Active
ENSG00000115616.3	SLC9A2	2.02218	5.88776	5.61366	5.96562901229448e-05	0.00108732	1.63112	Inactive-Active
ENSG00000226812.2	AL117382.1	2.66553	1.5953	5.61109	5.99319678394617e-05	0.0010917	2.02934	Inactive-Active
ENSG00000253755.1	IGHGP	-5.33287	4.85322	-5.61058	5.99865328414154e-05	0.00109201	1.96825	Inactive-Active
ENSG00000167283.8	ATP5MG	0.644853	4.57944	5.61006	6.00428614514908e-05	0.00109201	1.75922	Inactive-Active
ENSG00000255874.2	PRECSIT	-2.39175	0.437603	-5.60995	6.00549597801289e-05	0.00109201	2.03225	Inactive-Active
ENSG00000111775.3	COX6A1	0.786036	4.75907	5.60951	6.01021105730819e-05	0.00109222	1.72836	Inactive-Active
ENSG00000120725.13	SIL1	-0.932665	4.70103	-5.60751	6.03185116229932e-05	0.00109514	1.7651	Inactive-Active
ENSG00000187098.17	MITF	-1.09534	3.08405	-5.60737	6.03339790893818e-05	0.00109514	1.9628	Inactive-Active
ENSG00000158711.14	ELK4	-0.559787	5.87518	-5.6048	6.06129917670145e-05	0.00109956	1.66767	Inactive-Active
ENSG00000172183.16	ISG20	-1.66529	5.45788	-5.60435	6.06616473557495e-05	0.0010998	1.69451	Inactive-Active
ENSG00000102316.17	MAGED2	-0.737784	6.25625	-5.60297	6.08124696366011e-05	0.00110103	1.63	Inactive-Active
ENSG00000232874.1	AC080129.2	2.08686	-0.887373	5.60232	6.08838135476827e-05	0.00110103	1.89674	Inactive-Active
ENSG00000114948.13	ADAM23	-1.34357	1.97115	-5.60228	6.08881990965834e-05	0.00110103	2.03469	Inactive-Active
ENSG00000136732.16	GYPC	-1.61192	3.95448	-5.60227	6.08888995093673e-05	0.00110103	1.87329	Inactive-Active
ENSG00000182240.16	BACE2	-1.75637	6.47701	-5.60183	6.09369641149288e-05	0.00110103	1.6069	Inactive-Active
ENSG00000183287.14	CCBE1	-3.5218	-0.154473	-5.60176	6.09442249940538e-05	0.00110103	1.9715	Inactive-Active
ENSG00000224189.8	HAGLR	1.42649	5.13809	5.60014	6.11228148101618e-05	0.00110361	1.68629	Inactive-Active
ENSG00000167081.18	PBX3	-1.18176	3.64721	-5.59831	6.13242508267733e-05	0.0011066	1.88559	Inactive-Active
ENSG00000173660.12	UQCRH	0.622519	6.62147	5.59623	6.15530246082313e-05	0.00111008	1.56661	Inactive-Active
ENSG00000138684.9	IL21	-4.7838	-1.88818	-5.59266	6.1949797097818e-05	0.00111658	1.46784	Inactive-Active
ENSG00000128591.16	FLNC	-2.71255	3.72704	-5.59218	6.20035266144148e-05	0.0011169	1.85854	Inactive-Active
ENSG00000139874.6	SSTR1	1.98905	3.35212	5.59148	6.20817621806812e-05	0.00111765	1.82866	Inactive-Active
ENSG00000170381.14	SEMA3E	2.24901	0.954668	5.59089	6.2147875504254e-05	0.00111819	2.0184	Inactive-Active
ENSG00000196456.13	ZNF775	1.40752	2.87359	5.58989	6.2259232531169e-05	0.00111934	1.91076	Inactive-Active
ENSG00000198774.5	RASSF9	-2.00613	0.86385	-5.58956	6.22963763702402e-05	0.00111934	2.00923	Inactive-Active
ENSG00000166984.12	TCP10L2	3.92632	-3.09363	5.58934	6.23207613691612e-05	0.00111934	1.5515	Inactive-Active
ENSG00000164715.6	LMTK2	0.945375	6.17674	5.58654	6.26357755209306e-05	0.00112434	1.57598	Inactive-Active
ENSG00000162496.9	DHRS3	0.555085	5.65134	5.58536	6.27689447162652e-05	0.00112469	1.61471	Inactive-Active
ENSG00000149823.9	VPS51	0.516447	6.61673	5.58472	6.28413526247887e-05	0.00112469	1.55004	Inactive-Active
ENSG00000278192.1	AL118505.1	2.63702	0.748987	5.58461	6.28538509988865e-05	0.00112469	2.00805	Inactive-Active
ENSG00000145014.18	TMEM44	1.00647	4.70283	5.5846	6.28541953802391e-05	0.00112469	1.70126	Inactive-Active
ENSG00000271723.5	MROH7-TTC4	3.03727	-4.6167	5.58438	6.28796041412296e-05	0.00112469	1.24082	Inactive-Active
ENSG00000222041.11	CYTOR	-1.48265	2.11338	-5.58422	6.28981296315232e-05	0.00112469	1.99613	Inactive-Active
ENSG00000270728.1	AL035413.1	1.83746	0.460415	5.58388	6.29359010453836e-05	0.00112469	2.00862	Inactive-Active
ENSG00000262406.3	MMP12	-3.65525	5.25626	-5.58378	6.29472025276595e-05	0.00112469	1.71351	Inactive-Active
ENSG00000095321.18	CRAT	0.821034	5.59473	5.58333	6.29987798336356e-05	0.00112496	1.62099	Inactive-Active
ENSG00000091138.13	SLC26A3	2.70564	10.2573	5.58264	6.30769449625848e-05	0.00112557	1.32593	Inactive-Active
ENSG00000163251.4	FZD5	1.49099	6.859	5.58238	6.31057775566819e-05	0.00112557	1.50909	Inactive-Active
ENSG00000130055.14	GDPD2	1.2791	2.8714	5.58145	6.32122816776806e-05	0.00112682	1.87305	Inactive-Active
ENSG00000214530.10	STARD10	1.46951	7.13588	5.57871	6.35250329903936e-05	0.00113174	1.48575	Inactive-Active
ENSG00000133818.14	RRAS2	0.617341	4.75563	5.57746	6.36680256039541e-05	0.00113363	1.68735	Inactive-Active
ENSG00000211947.2	IGHV3-21	-2.51389	7.13734	-5.57266	6.42199800459023e-05	0.0011428	1.54131	Inactive-Active
ENSG00000182218.10	HHIPL1	-1.86339	1.7233	-5.57148	6.43572348242973e-05	0.00114458	1.9881	Inactive-Active
ENSG00000075240.17	GRAMD4	0.759748	6.58401	5.56946	6.45911178253285e-05	0.00114808	1.51596	Inactive-Active
ENSG00000175414.7	ARL10	-1.19084	2.8974	-5.56853	6.47000603815266e-05	0.00114898	1.91981	Inactive-Active
ENSG00000243518.1	AC108729.2	3.27121	-3.63853	5.56772	6.47940114704451e-05	0.00114898	1.36973	Inactive-Active
ENSG00000090263.16	MRPS33	0.795711	4.99049	5.56757	6.48113654608484e-05	0.00114898	1.64511	Inactive-Active
ENSG00000286017.1	AC011322.1	2.49109	0.496369	5.56738	6.48334563773127e-05	0.00114898	1.98168	Inactive-Active
ENSG00000076604.15	TRAF4	0.692278	5.8105	5.56707	6.48699819260254e-05	0.00114898	1.57527	Inactive-Active
ENSG00000184292.7	TACSTD2	-2.23337	0.766235	-5.5668	6.49015567520411e-05	0.00114898	1.97632	Inactive-Active
ENSG00000227742.2	CALR4P	3.01974	-0.302578	5.56672	6.49108782198455e-05	0.00114898	1.95276	Inactive-Active
ENSG00000205358.4	MT1H	4.2976	1.77305	5.56647	6.49403570084224e-05	0.00114898	1.92884	Inactive-Active
ENSG00000134590.14	RTL8C	-0.848184	5.19256	-5.5661	6.49841780368912e-05	0.0011491	1.6511	Inactive-Active
ENSG00000156711.17	MAPK13	1.0134	7.04011	5.56478	6.51383699225706e-05	0.00115053	1.47026	Inactive-Active
ENSG00000118946.12	PCDH17	-2.65663	3.03566	-5.56477	6.51398682813349e-05	0.00115053	1.91442	Inactive-Active
ENSG00000135842.17	NIBAN1	-1.83509	4.7028	-5.56401	6.52290147354161e-05	0.00115097	1.71327	Inactive-Active
ENSG00000139629.16	GALNT6	-1.25654	5.09827	-5.56392	6.52393946540336e-05	0.00115097	1.65752	Inactive-Active
ENSG00000272335.1	AC093297.2	0.832855	2.82605	5.56279	6.53729600865738e-05	0.00115191	1.87098	Inactive-Active
ENSG00000123684.13	LPGAT1	-0.776328	6.07165	-5.56267	6.53862607606871e-05	0.00115191	1.56784	Inactive-Active
ENSG00000124508.17	BTN2A2	-1.07473	4.15083	-5.56252	6.54046333287201e-05	0.00115191	1.76339	Inactive-Active
ENSG00000115561.16	CHMP3	0.620219	6.61953	5.56184	6.54849594342866e-05	0.00115266	1.50652	Inactive-Active
ENSG00000234690.7	EPCAM-DT	1.91601	1.57491	5.56147	6.55277535916901e-05	0.00115276	1.93314	Inactive-Active
ENSG00000254827.6	SLC22A18AS	1.5838	2.68234	5.56068	6.56221439208032e-05	0.00115376	1.84212	Inactive-Active
ENSG00000153561.13	RMND5A	1.08294	6.67944	5.56025	6.56720770220711e-05	0.00115398	1.48653	Inactive-Active
ENSG00000147113.17	DIPK2B	-1.98878	3.00859	-5.55992	6.57112954126832e-05	0.00115401	1.88967	Inactive-Active
ENSG00000025293.17	PHF20	-0.53449	5.26766	-5.55938	6.57758792621627e-05	0.00115449	1.63421	Inactive-Active
ENSG00000137960.6	GIPC2	1.40373	5.19634	5.55869	6.58578805939845e-05	0.00115527	1.59802	Inactive-Active
ENSG00000169508.7	GPR183	-1.7184	3.65477	-5.55831	6.59021228161626e-05	0.00115539	1.82496	Inactive-Active
ENSG00000184809.13	B3GALT5-AS1	3.83506	2.85264	5.55731	6.60209618568228e-05	0.00115648	1.74307	Inactive-Active
ENSG00000138029.14	HADHB	0.695232	7.00507	5.55716	6.60394850890597e-05	0.00115648	1.46573	Inactive-Active
ENSG00000279368.1	AL031123.3	2.33232	-0.393137	5.55675	6.60883720856688e-05	0.00115668	1.93381	Inactive-Active
ENSG00000150630.4	VEGFC	-2.14399	1.22859	-5.55507	6.62890468154784e-05	0.00115953	1.96128	Inactive-Active
ENSG00000239205.1	LINC02023	3.44144	1.17897	5.55418	6.63955612084282e-05	0.00116074	1.93812	Inactive-Active
ENSG00000165496.5	RPL10L	2.54945	-0.765948	5.5524	6.66086650445326e-05	0.0011638	1.90878	Inactive-Active
ENSG00000105755.8	ETHE1	1.5313	5.91733	5.55185	6.6675344522418e-05	0.0011639	1.51589	Inactive-Active
ENSG00000170786.13	SDR16C5	-1.53614	3.59996	-5.55172	6.66899495590844e-05	0.0011639	1.7804	Inactive-Active
ENSG00000212440.1	SNORA75	2.48504	-5.153	5.55119	6.6754637992757e-05	0.00116437	1.08789	Inactive-Active
ENSG00000165516.11	KLHDC2	0.596386	5.40969	5.55038	6.68518096052991e-05	0.00116533	1.5793	Inactive-Active
ENSG00000058262.10	SEC61A1	-0.690322	8.02261	-5.55011	6.68850368818185e-05	0.00116533	1.40474	Inactive-Active
ENSG00000243290.3	IGKV1-12	-2.1655	7.06773	-5.54915	6.70005466264545e-05	0.00116668	1.49987	Inactive-Active
ENSG00000163191.6	S100A11	-1.53147	6.03882	-5.54881	6.70420975700956e-05	0.00116674	1.54421	Inactive-Active
ENSG00000122585.8	NPY	4.17304	-1.80663	5.54801	6.71385800409319e-05	0.00116776	1.78669	Inactive-Active
ENSG00000105997.22	HOXA3	1.36225	3.46272	5.5468	6.72853970603356e-05	0.00116966	1.76136	Inactive-Active
ENSG00000060566.14	CREB3L3	3.13229	1.3298	5.54399	6.76276065166118e-05	0.00117494	1.93146	Inactive-Active
ENSG00000150636.17	CCDC102B	-1.32016	2.30016	-5.54359	6.76755136840436e-05	0.00117511	1.91146	Inactive-Active
ENSG00000118733.17	OLFM3	-4.25185	-3.62483	-5.5429	6.77604984132318e-05	0.00117593	1.25232	Inactive-Active
ENSG00000134874.18	DZIP1	-1.24511	3.33392	-5.54133	6.79524161826692e-05	0.00117859	1.83953	Inactive-Active
ENSG00000146521.10	LINC01558	2.03844	1.12194	5.54045	6.80602266731097e-05	0.00117959	1.9352	Inactive-Active
ENSG00000167566.17	NCKAP5L	-1.17496	3.46694	-5.53997	6.81192564298562e-05	0.00117959	1.81297	Inactive-Active
ENSG00000067955.15	CBFB	-0.64202	5.44689	-5.53993	6.81244092832141e-05	0.00117959	1.58579	Inactive-Active
ENSG00000174749.6	FAM241A	-1.20461	3.89813	-5.5325	6.90450588960208e-05	0.00119468	1.72881	Inactive-Active
ENSG00000280162.1	AL136531.3	1.83884	1.20036	5.53227	6.90733905252543e-05	0.00119468	1.91176	Inactive-Active
ENSG00000212907.2	MT-ND4L	1.22908	10.5242	5.53113	6.92160249311684e-05	0.00119602	1.23423	Inactive-Active
ENSG00000138193.16	PLCE1	1.37047	6.24829	5.53103	6.92289032489618e-05	0.00119602	1.46533	Inactive-Active
ENSG00000107262.26	BAG1	0.558386	6.59467	5.53059	6.92835900714967e-05	0.0011963	1.44723	Inactive-Active
ENSG00000184434.8	LRRC19	1.7942	6.46247	5.52998	6.9359996862768e-05	0.00119695	1.43179	Inactive-Active
ENSG00000196372.13	ASB13	0.90944	5.2546	5.5273	6.96965860321229e-05	0.00120148	1.5503	Inactive-Active
ENSG00000006756.16	ARSD	1.14809	5.78574	5.52727	6.97006898415283e-05	0.00120148	1.48143	Inactive-Active
ENSG00000178462.12	TUBAL3	2.06618	3.43587	5.52644	6.98048654969736e-05	0.0012026	1.67258	Inactive-Active
ENSG00000263508.6	AC015908.2	2.07797	-0.276386	5.52347	7.01807971367794e-05	0.0012084	1.88657	Inactive-Active
ENSG00000086548.9	CEACAM6	-1.97736	9.07109	-5.52139	7.04458675377515e-05	0.00121169	1.28665	Inactive-Active
ENSG00000170017.12	ALCAM	-0.824777	5.0902	-5.5211	7.04817300872173e-05	0.00121169	1.57075	Inactive-Active
ENSG00000213672.8	NCKIPSD	0.633533	4.30832	5.52104	7.04898192621036e-05	0.00121169	1.63082	Inactive-Active
ENSG00000141582.15	CBX4	-1.06825	4.62909	-5.52005	7.06165576961937e-05	0.0012132	1.63363	Inactive-Active
ENSG00000152804.11	HHEX	-1.79142	2.95531	-5.51808	7.08685373955485e-05	0.00121685	1.82059	Inactive-Active
ENSG00000186174.12	BCL9L	-0.800882	5.13671	-5.5174	7.09549815032906e-05	0.00121765	1.56643	Inactive-Active
ENSG00000101473.17	ACOT8	0.830324	4.30755	5.51696	7.10122895749781e-05	0.00121796	1.61293	Inactive-Active
ENSG00000144810.16	COL8A1	-3.62545	2.63905	-5.51662	7.1055155014754e-05	0.00121801	1.87202	Inactive-Active
ENSG00000105894.12	PTN	1.38289	3.35368	5.51569	7.1174638540777e-05	0.00121938	1.7423	Inactive-Active
ENSG00000224373.3	IGHV4-59	-2.01423	7.5906	-5.51503	7.12597176102667e-05	0.0012198	1.41063	Inactive-Active
ENSG00000109089.7	CDR2L	-1.86326	2.74661	-5.51489	7.127815981226e-05	0.0012198	1.83443	Inactive-Active
ENSG00000275302.2	CCL4	-2.52711	1.42667	-5.51271	7.15601707767937e-05	0.00122395	1.88947	Inactive-Active
ENSG00000178175.12	ZNF366	-1.35225	1.71227	-5.50901	7.20402626714733e-05	0.0012309	1.87549	Inactive-Active
ENSG00000125354.24	SEPTIN6	-1.38624	5.30738	-5.50897	7.20461775215109e-05	0.0012309	1.55441	Inactive-Active
ENSG00000119185.13	ITGB1BP1	-0.680741	4.75772	-5.5081	7.21589501563116e-05	0.00123214	1.58609	Inactive-Active
ENSG00000042062.13	RIPOR3	-1.67937	3.85093	-5.50671	7.23414724198696e-05	0.00123457	1.71092	Inactive-Active
ENSG00000154743.19	TSEN2	1.20048	4.07814	5.50617	7.2411495175092e-05	0.00123508	1.63781	Inactive-Active
ENSG00000248441.7	LINC01197	-1.74269	0.381113	-5.50526	7.25316554411512e-05	0.00123645	1.82992	Inactive-Active
ENSG00000008277.14	ADAM22	1.74097	2.91745	5.50463	7.26144918686724e-05	0.00123682	1.74181	Inactive-Active
ENSG00000007516.14	BAIAP3	1.54978	3.00941	5.50448	7.26338677218512e-05	0.00123682	1.7418	Inactive-Active
ENSG00000271601.4	LIX1L	-1.11553	3.99806	-5.50317	7.28068720299221e-05	0.00123908	1.68511	Inactive-Active
ENSG00000244122.2	UGT1A7	4.23897	-1.84048	5.50202	7.29575078872793e-05	0.00124096	1.6694	Inactive-Active
ENSG00000139793.19	MBNL2	-0.482139	6.23099	-5.50157	7.30169680199375e-05	0.00124129	1.43794	Inactive-Active
ENSG00000214888.3	AL772337.1	4.37726	-2.47712	5.49811	7.34768735037834e-05	0.0012478	1.65856	Inactive-Active
ENSG00000129048.7	ACKR4	-2.19256	1.23224	-5.49808	7.3480887001108e-05	0.0012478	1.86289	Inactive-Active
ENSG00000167779.9	IGFBP6	-1.37018	3.70701	-5.49694	7.3631728495748e-05	0.00124954	1.71318	Inactive-Active
ENSG00000253217.1	AP001574.1	3.7618	-3.37903	5.4967	7.36647643818078e-05	0.00124954	1.34558	Inactive-Active
ENSG00000117791.16	MTARC2	0.897914	4.41807	5.49634	7.37126685554804e-05	0.00124967	1.57349	Inactive-Active
ENSG00000227258.6	SMIM2-AS1	1.47603	2.77572	5.49532	7.38489231233786e-05	0.00125129	1.72529	Inactive-Active
ENSG00000101236.17	RNF24	-1.56802	3.50759	-5.49445	7.39657010678956e-05	0.00125251	1.71739	Inactive-Active
ENSG00000269313.5	MAGIX	1.35243	2.69613	5.49392	7.40358542966918e-05	0.00125251	1.73192	Inactive-Active
ENSG00000159792.10	PSKH1	0.550932	5.14009	5.49387	7.40426829356938e-05	0.00125251	1.49625	Inactive-Active
ENSG00000165915.14	SLC39A13	-0.897786	4.72034	-5.49185	7.43146565497093e-05	0.00125642	1.57118	Inactive-Active
ENSG00000183049.13	CAMK1D	1.10534	6.01475	5.49113	7.44119474679394e-05	0.00125737	1.41661	Inactive-Active
ENSG00000203497.2	PDCD4-AS1	1.00281	1.81911	5.48959	7.46200047356843e-05	0.0012602	1.81827	Inactive-Active
ENSG00000179091.5	CYC1	0.943367	7.26436	5.48737	7.49203433474423e-05	0.00126458	1.31529	Inactive-Active
ENSG00000228253.1	MT-ATP8	0.974916	9.32707	5.48504	7.5237343244902e-05	0.00126923	1.20215	Inactive-Active
ENSG00000178401.16	DNAJC22	1.05238	5.5604	5.48207	7.56442505845539e-05	0.0012754	1.43882	Inactive-Active
ENSG00000119862.13	LGALSL	0.763487	4.80443	5.48067	7.58358324481043e-05	0.00127793	1.49255	Inactive-Active
ENSG00000238105.7	GOLGA2P5	1.43587	4.83947	5.48023	7.58959153192797e-05	0.00127824	1.49368	Inactive-Active
ENSG00000047849.21	MAP4	-0.606936	7.26587	-5.4795	7.59975096169353e-05	0.00127926	1.3237	Inactive-Active
ENSG00000211945.2	IGHV1-18	-2.43285	6.96548	-5.47905	7.60587508147628e-05	0.00127959	1.37914	Inactive-Active
ENSG00000158486.13	DNAH3	1.26302	1.84453	5.47863	7.61168168203874e-05	0.00127987	1.77331	Inactive-Active
ENSG00000227947.2	LINC01738	3.92676	-2.87456	5.4776	7.6258830200738e-05	0.00128156	1.39613	Inactive-Active
ENSG00000185880.13	TRIM69	-1.18097	2.76326	-5.47721	7.63134081512001e-05	0.00128172	1.73368	Inactive-Active
ENSG00000138600.10	SPPL2A	0.689602	7.06795	5.47671	7.6382529490722e-05	0.00128172	1.31282	Inactive-Active
ENSG00000164970.15	FAM219A	-0.816462	4.17601	-5.47663	7.63936031560634e-05	0.00128172	1.59708	Inactive-Active
ENSG00000259953.2	AL138756.1	1.30582	3.2354	5.47626	7.64451312493817e-05	0.00128189	1.65597	Inactive-Active
ENSG00000116985.12	BMP8B	0.958119	3.95988	5.47314	7.68792339800646e-05	0.00128847	1.57354	Inactive-Active
ENSG00000128335.14	APOL2	-1.20824	5.68608	-5.47254	7.69631685330457e-05	0.00128902	1.42984	Inactive-Active
ENSG00000254709.8	IGLL5	-1.40481	3.30273	-5.4723	7.69956176123629e-05	0.00128902	1.73536	Inactive-Active
ENSG00000154265.16	ABCA5	1.11486	6.26474	5.47072	7.72170495851919e-05	0.00129198	1.36057	Inactive-Active
ENSG00000138303.18	ASCC1	-0.67412	3.82516	-5.47018	7.72935897671603e-05	0.00129198	1.6115	Inactive-Active
ENSG00000121210.16	TMEM131L	-1.5297	3.63224	-5.47014	7.72981041401883e-05	0.00129198	1.65913	Inactive-Active
ENSG00000112541.18	PDE10A	-2.41115	1.53693	-5.46927	7.74201068498017e-05	0.00129331	1.81515	Inactive-Active
ENSG00000197380.11	DACT3	-1.43225	2.49533	-5.46696	7.77458147202947e-05	0.00129692	1.7717	Inactive-Active
ENSG00000242086.8	MUC20-OT1	1.19997	2.44161	5.46683	7.77643029546466e-05	0.00129692	1.72834	Inactive-Active
ENSG00000169439.12	SDC2	-1.19609	5.38261	-5.46674	7.77768819737235e-05	0.00129692	1.4819	Inactive-Active
ENSG00000180044.6	C3orf80	-2.4761	0.533929	-5.46633	7.7835501104366e-05	0.00129692	1.7968	Inactive-Active
ENSG00000073282.14	TP63	-2.20163	-1.51196	-5.46625	7.78464988199141e-05	0.00129692	1.54476	Inactive-Active
ENSG00000211593.2	IGKJ5	-1.44469	2.55078	-5.46538	7.79688260999408e-05	0.00129783	1.77474	Inactive-Active
ENSG00000144668.12	ITGA9	-0.965518	4.22309	-5.46527	7.79853579166772e-05	0.00129783	1.58107	Inactive-Active
ENSG00000134516.18	DOCK2	-1.42214	5.15915	-5.46351	7.82349085573989e-05	0.00130128	1.48312	Inactive-Active
ENSG00000121064.13	SCPEP1	-0.905915	5.28161	-5.46285	7.83286087147321e-05	0.00130214	1.46219	Inactive-Active
ENSG00000115112.8	TFCP2L1	1.42342	6.76355	5.46228	7.84099872620576e-05	0.00130279	1.29546	Inactive-Active
ENSG00000139835.14	GRTP1	1.4072	4.6602	5.46135	7.85419411648465e-05	0.00130428	1.4651	Inactive-Active
ENSG00000180644.8	PRF1	-1.84062	2.38629	-5.4602	7.87066303134051e-05	0.00130544	1.74816	Inactive-Active
ENSG00000012223.13	LTF	-3.75573	2.21309	-5.46008	7.87235478371153e-05	0.00130544	1.78152	Inactive-Active
ENSG00000198888.2	MT-ND1	1.19957	12.5205	5.45997	7.87388384308991e-05	0.00130544	1.03317	Inactive-Active
ENSG00000163378.14	EOGT	-1.05825	4.15011	-5.45916	7.88549913189735e-05	0.00130666	1.56836	Inactive-Active
ENSG00000125967.17	NECAB3	0.835991	4.34503	5.45854	7.89432764088865e-05	0.00130742	1.50383	Inactive-Active
ENSG00000137269.15	LRRC1	1.05014	5.76154	5.45774	7.90583861064428e-05	0.00130862	1.36817	Inactive-Active
ENSG00000162413.16	KLHL21	-0.831282	4.80683	-5.4566	7.92226340640487e-05	0.00131064	1.49014	Inactive-Active
ENSG00000196782.12	MAML3	0.843013	4.12128	5.45593	7.93185249921761e-05	0.00131152	1.52236	Inactive-Active
ENSG00000226197.3	AL583785.1	-4.38522	-2.56102	-5.45479	7.94831469359829e-05	0.0013135	1.16136	Inactive-Active
ENSG00000187609.16	EXD3	0.632825	4.43912	5.45412	7.95798175694677e-05	0.0013135	1.48204	Inactive-Active
ENSG00000170469.11	SPATA24	1.43741	2.50259	5.45395	7.96056008350393e-05	0.0013135	1.69177	Inactive-Active
ENSG00000116704.8	SLC35D1	0.924749	6.67442	5.45393	7.96085225519193e-05	0.0013135	1.29272	Inactive-Active
ENSG00000261801.6	LOXL1-AS1	-1.67212	1.33413	-5.45333	7.96943685145096e-05	0.00131417	1.78822	Inactive-Active
ENSG00000115107.20	STEAP3	1.17232	4.39882	5.45306	7.97345073300461e-05	0.00131417	1.48446	Inactive-Active
ENSG00000101076.17	HNF4A	1.46728	7.70115	5.45216	7.98642436910968e-05	0.00131434	1.21815	Inactive-Active
ENSG00000061337.15	LZTS1	-2.70502	0.78979	-5.4521	7.98726616594747e-05	0.00131434	1.75821	Inactive-Active
ENSG00000166974.13	MAPRE2	-0.499757	5.6853	-5.4521	7.98727418884281e-05	0.00131434	1.39023	Inactive-Active
ENSG00000130779.22	CLIP1	-0.54485	6.02436	-5.45137	7.99793144912356e-05	0.00131539	1.36127	Inactive-Active
ENSG00000219438.9	TAFA5	-2.54029	0.339629	-5.45099	8.0034684520417e-05	0.00131546	1.74888	Inactive-Active
ENSG00000122862.5	SRGN	-2.19926	6.35757	-5.45047	8.01105070375808e-05	0.00131546	1.35391	Inactive-Active
ENSG00000039537.14	C6	2.33705	-1.83008	5.45046	8.0111561953768e-05	0.00131546	1.62468	Inactive-Active
ENSG00000178188.14	SH2B1	0.602123	6.61671	5.44787	8.04894443242708e-05	0.00132065	1.30285	Inactive-Active
ENSG00000147180.17	ZNF711	1.26134	3.54061	5.44771	8.051319540187e-05	0.00132065	1.57686	Inactive-Active
ENSG00000136144.12	RCBTB1	-0.767454	4.31905	-5.44551	8.08360958868588e-05	0.00132524	1.51834	Inactive-Active
ENSG00000179431.7	FJX1	-2.80775	1.03367	-5.44522	8.08789076644194e-05	0.00132524	1.76111	Inactive-Active
ENSG00000117228.11	GBP1	-1.6569	5.38949	-5.44471	8.0953251693932e-05	0.00132575	1.41147	Inactive-Active
ENSG00000247679.3	AC139795.2	0.931388	2.98038	5.44309	8.11925689079675e-05	0.00132896	1.64528	Inactive-Active
ENSG00000135617.4	PRADC1	0.851822	4.21113	5.44258	8.12669437105602e-05	0.00132947	1.48655	Inactive-Active
ENSG00000212978.6	AC016747.1	-1.75559	0.655581	-5.44228	8.13125158528155e-05	0.00132951	1.7649	Inactive-Active
ENSG00000180525.13	DIP2C-AS1	2.08063	2.94805	5.4418	8.13828246822249e-05	0.00132996	1.5944	Inactive-Active
ENSG00000130755.13	GMFG	-1.65855	4.31539	-5.44068	8.15482528791217e-05	0.00133195	1.53495	Inactive-Active
ENSG00000130956.14	HABP4	-1.3417	2.70845	-5.43861	8.18558208003278e-05	0.00133627	1.69245	Inactive-Active
ENSG00000073910.23	FRY	-1.11382	3.85503	-5.4382	8.19180188777146e-05	0.00133658	1.57116	Inactive-Active
ENSG00000145103.15	ILDR1	1.36042	3.7916	5.43789	8.19641129521773e-05	0.00133662	1.49698	Inactive-Active
ENSG00000065600.13	PACC1	-1.02662	2.35455	-5.43565	8.22978988106838e-05	0.00134121	1.71207	Inactive-Active
ENSG00000259345.7	AC013652.1	2.40159	-1.08764	5.43542	8.23325792292369e-05	0.00134121	1.68557	Inactive-Active
ENSG00000000003.15	TSPAN6	1.27849	5.94247	5.43492	8.24076057259619e-05	0.00134172	1.29846	Inactive-Active
ENSG00000287626.1	AL021978.1	-2.76574	-1.66649	-5.4343	8.25015118880248e-05	0.00134254	1.51492	Inactive-Active
ENSG00000121310.17	ECHDC2	1.10332	6.67808	5.4335	8.26211767062938e-05	0.00134345	1.27143	Inactive-Active
ENSG00000286750.1	AC015802.7	2.1453	0.00633038	5.43335	8.26441515451965e-05	0.00134345	1.73273	Inactive-Active
ENSG00000071189.21	SNX13	0.636166	6.16823	5.43141	8.29363150715778e-05	0.00134749	1.3019	Inactive-Active
ENSG00000135439.11	AGAP2	-1.56097	2.75917	-5.43009	8.31357971722733e-05	0.00134981	1.67396	Inactive-Active
ENSG00000148600.15	CDHR1	3.99607	5.89545	5.42988	8.31669299545471e-05	0.00134981	1.27566	Inactive-Active
ENSG00000145703.16	IQGAP2	0.692774	6.77357	5.4265	8.36799071723817e-05	0.00135742	1.23682	Inactive-Active
ENSG00000170955.10	CAVIN3	-1.89731	3.07334	-5.42601	8.37550444847214e-05	0.00135792	1.65644	Inactive-Active
ENSG00000166126.11	AMN	1.37886	6.96821	5.425	8.3909237246634e-05	0.00135968	1.2145	Inactive-Active
ENSG00000198556.14	ZNF789	1.13991	4.22573	5.42473	8.39514079711717e-05	0.00135968	1.47183	Inactive-Active
ENSG00000245812.3	LINC02202	-2.79148	-1.43999	-5.4241	8.40466798631557e-05	0.0013602	1.42469	Inactive-Active
ENSG00000145332.14	KLHL8	0.684553	5.06535	5.42394	8.40722212825881e-05	0.0013602	1.36998	Inactive-Active
ENSG00000166313.19	APBB1	-1.1868	3.30938	-5.42353	8.41338978585957e-05	0.00136049	1.61865	Inactive-Active
ENSG00000116017.11	ARID3A	-1.09044	4.53863	-5.42272	8.42588196270064e-05	0.00136119	1.46675	Inactive-Active
ENSG00000110274.16	CEP164	-0.60046	4.7434	-5.42267	8.42655432831824e-05	0.00136119	1.43401	Inactive-Active
ENSG00000131067.17	GGT7	0.749344	5.02344	5.42153	8.44411663016376e-05	0.00136331	1.39318	Inactive-Active
ENSG00000114446.5	IFT57	0.628973	5.17769	5.4206	8.45844980538113e-05	0.00136491	1.35743	Inactive-Active
ENSG00000135124.15	P2RX4	0.94927	6.03944	5.42008	8.46642345343794e-05	0.00136548	1.27901	Inactive-Active
ENSG00000100644.17	HIF1A	-1.4285	7.2053	-5.4197	8.47236055260484e-05	0.00136573	1.22441	Inactive-Active
ENSG00000164362.21	TERT	2.06448	0.853019	5.41882	8.48599608703648e-05	0.00136721	1.72655	Inactive-Active
ENSG00000174099.12	MSRB3	-1.71474	4.33761	-5.41829	8.49416592659834e-05	0.00136781	1.4957	Inactive-Active
ENSG00000145391.14	SETD7	-0.932911	5.83844	-5.41695	8.51492218918205e-05	0.00137044	1.31925	Inactive-Active
ENSG00000176092.17	CRYBG2	1.05063	4.22797	5.41525	8.54133187453877e-05	0.00137079	1.4338	Inactive-Active
ENSG00000114270.18	COL7A1	-2.90009	5.21	-5.41518	8.54237916128493e-05	0.00137079	1.43277	Inactive-Active
ENSG00000141968.8	VAV1	-1.49595	4.37914	-5.41516	8.54277791535206e-05	0.00137079	1.47206	Inactive-Active
ENSG00000010671.16	BTK	-1.74672	4.08273	-5.41484	8.54773834034448e-05	0.00137079	1.51284	Inactive-Active
ENSG00000075213.11	SEMA3A	-1.04335	3.16531	-5.41467	8.55032719142703e-05	0.00137079	1.6131	Inactive-Active
ENSG00000178741.12	COX5A	0.966186	6.85212	5.41442	8.55432096229857e-05	0.00137079	1.203	Inactive-Active
ENSG00000242534.2	IGKV2D-28	-2.40859	4.29932	-5.41425	8.55695005674303e-05	0.00137079	1.51039	Inactive-Active
ENSG00000120280.6	TASL	-1.41524	2.40836	-5.41417	8.55809069098642e-05	0.00137079	1.67216	Inactive-Active
ENSG00000121297.8	TSHZ3	-1.42684	3.08054	-5.41413	8.55881866640219e-05	0.00137079	1.62737	Inactive-Active
ENSG00000187658.7	C5orf52	1.89326	-0.339223	5.41395	8.56160592927087e-05	0.00137079	1.71043	Inactive-Active
ENSG00000273230.1	AC102953.2	1.16083	1.964	5.41204	8.5913912161115e-05	0.00137485	1.6683	Inactive-Active
ENSG00000135362.14	PRR5L	1.34103	5.93687	5.4112	8.60459841536083e-05	0.00137624	1.25972	Inactive-Active
ENSG00000104324.16	CPQ	-0.933001	4.60578	-5.41073	8.61197212723839e-05	0.00137671	1.42461	Inactive-Active
ENSG00000106366.9	SERPINE1	-3.61887	2.95808	-5.40916	8.63659292909808e-05	0.00137993	1.65377	Inactive-Active
ENSG00000158865.12	SLC5A11	3.21472	-0.751028	5.40811	8.65316331707144e-05	0.00138163	1.55977	Inactive-Active
ENSG00000013725.14	CD6	-1.56829	3.81564	-5.40759	8.66141715508026e-05	0.00138163	1.53682	Inactive-Active
ENSG00000164318.18	EGFLAM	-2.09251	2.32557	-5.40751	8.66260126192591e-05	0.00138163	1.68196	Inactive-Active
ENSG00000153574.9	RPIA	0.627513	4.98816	5.40735	8.66514325890673e-05	0.00138163	1.36172	Inactive-Active
ENSG00000167157.11	PRRX2	-2.25573	0.712443	-5.4064	8.6802543890878e-05	0.00138328	1.69825	Inactive-Active
ENSG00000149311.19	ATM	-0.907699	6.32561	-5.40613	8.68450587467997e-05	0.00138328	1.27679	Inactive-Active
ENSG00000171219.9	CDC42BPG	1.05843	5.77207	5.4051	8.70081038763208e-05	0.00138516	1.26767	Inactive-Active
ENSG00000256643.1	LINC02441	4.38214	1.05149	5.40412	8.71633868684151e-05	0.0013869	1.65372	Inactive-Active
ENSG00000234617.2	SNRK-AS1	1.58197	-0.289401	5.40385	8.7207203795107e-05	0.0013869	1.66194	Inactive-Active
ENSG00000115295.20	CLIP4	-1.47237	3.32171	-5.40223	8.74656719344503e-05	0.00139019	1.57631	Inactive-Active
ENSG00000129988.6	LBP	-4.25953	-2.50511	-5.40198	8.75044364016404e-05	0.00139019	1.08943	Inactive-Active
ENSG00000123131.13	PRDX4	-1.15659	5.79595	-5.39973	8.78653495912949e-05	0.00139518	1.30176	Inactive-Active
ENSG00000257185.2	LINC02293	3.27781	-1.21406	5.39945	8.79089661343485e-05	0.00139518	1.60798	Inactive-Active
ENSG00000169021.6	UQCRFS1	0.75272	6.37013	5.399	8.7981822979326e-05	0.00139562	1.21285	Inactive-Active
ENSG00000119698.12	PPP4R4	-3.759	-3.47749	-5.39804	8.81361188672453e-05	0.00139735	1.05041	Inactive-Active
ENSG00000230356.1	NCAPD2P1	-4.03824	-3.73263	-5.3975	8.82237022668996e-05	0.00139765	0.99096	Inactive-Active
ENSG00000180902.18	D2HGDH	1.05597	5.41115	5.39736	8.8245968431014e-05	0.00139765	1.30459	Inactive-Active
ENSG00000237476.1	LINC01637	1.91656	2.10176	5.3958	8.84975700762698e-05	0.00140092	1.61384	Inactive-Active
ENSG00000152583.13	SPARCL1	-1.57994	7.05335	-5.3953	8.85772806386355e-05	0.00140134	1.20546	Inactive-Active
ENSG00000166086.13	JAM3	-1.18417	3.12931	-5.39507	8.86149738477127e-05	0.00140134	1.58345	Inactive-Active
ENSG00000262814.8	MRPL12	0.985488	2.44865	5.3947	8.86754619310595e-05	0.00140157	1.59106	Inactive-Active
ENSG00000100060.18	MFNG	-1.22615	4.02779	-5.39373	8.88323184086261e-05	0.00140262	1.46452	Inactive-Active
ENSG00000237765.8	FAM200B	0.767056	3.27514	5.39344	8.88793531611767e-05	0.00140262	1.51939	Inactive-Active
ENSG00000198879.12	SFMBT2	-1.12138	4.25443	-5.39338	8.88885414116972e-05	0.00140262	1.45273	Inactive-Active
ENSG00000185112.6	FAM43A	-1.25713	4.12545	-5.39316	8.89240530597764e-05	0.00140262	1.42756	Inactive-Active
ENSG00000167315.18	ACAA2	1.13391	7.17159	5.3923	8.9064949594498e-05	0.00140413	1.14568	Inactive-Active
ENSG00000151789.12	ZNF385D	-1.90526	1.61475	-5.39175	8.91529925867612e-05	0.00140453	1.6771	Inactive-Active
ENSG00000102981.10	PARD6A	-1.40724	1.0346	-5.39158	8.91816264040442e-05	0.00140453	1.68072	Inactive-Active
ENSG00000166762.19	CATSPER2	1.02379	3.49269	5.39108	8.92626586966865e-05	0.00140483	1.50967	Inactive-Active
ENSG00000132854.19	KANK4	2.85537	0.804974	5.3909	8.92920263050772e-05	0.00140483	1.67867	Inactive-Active
ENSG00000152234.16	ATP5F1A	0.611088	8.6937	5.39028	8.93930270726422e-05	0.00140571	1.05383	Inactive-Active
ENSG00000075420.13	FNDC3B	-0.853313	6.70268	-5.38974	8.94810386561985e-05	0.00140637	1.19673	Inactive-Active
ENSG00000091592.16	NLRP1	-1.31038	4.90313	-5.38783	8.97947716122239e-05	0.00141058	1.39102	Inactive-Active
ENSG00000115825.11	PRKD3	-0.576665	5.34967	-5.3875	8.98478380793612e-05	0.0014107	1.31282	Inactive-Active
ENSG00000003249.15	DBNDD1	-1.62167	1.76688	-5.38569	9.0146217439703e-05	0.00141466	1.65138	Inactive-Active
ENSG00000235029.1	MNX1-AS2	2.15724	-0.703346	5.3854	9.01935978245431e-05	0.00141469	1.6198	Inactive-Active
ENSG00000136848.17	DAB2IP	0.653105	7.17624	5.38496	9.02658588524137e-05	0.00141472	1.13485	Inactive-Active
ENSG00000128274.17	A4GALT	-1.9059	2.97869	-5.38483	9.02876243689182e-05	0.00141472	1.58597	Inactive-Active
ENSG00000259823.6	LYPD8	2.45532	5.60839	5.38453	9.0336658231981e-05	0.00141477	1.22003	Inactive-Active
ENSG00000197283.17	SYNGAP1	-1.02916	2.82722	-5.38261	9.06548448700911e-05	0.00141903	1.5871	Inactive-Active
ENSG00000143061.18	IGSF3	1.15495	5.28326	5.38205	9.07471599595509e-05	0.00141976	1.26272	Inactive-Active
ENSG00000154133.15	ROBO4	-1.91362	3.1951	-5.38173	9.07994164598988e-05	0.00141985	1.56549	Inactive-Active
ENSG00000272720.1	AL022322.1	1.27173	1.8548	5.3801	9.10704225610309e-05	0.00142302	1.62748	Inactive-Active
ENSG00000265107.3	GJA5	-2.6148	1.09473	-5.37975	9.11291763614724e-05	0.00142302	1.66181	Inactive-Active
ENSG00000175745.14	NR2F1	-1.61636	3.95567	-5.37968	9.11402128613066e-05	0.00142302	1.48623	Inactive-Active
ENSG00000273344.1	PAXIP1-DT	0.971404	3.49102	5.37862	9.131708144429e-05	0.00142506	1.46634	Inactive-Active
ENSG00000120915.14	EPHX2	1.59795	5.81818	5.3773	9.15375548973063e-05	0.00142627	1.21026	Inactive-Active
ENSG00000171100.15	MTM1	1.13083	5.38311	5.37722	9.15514000948924e-05	0.00142627	1.24395	Inactive-Active
ENSG00000123612.16	ACVR1C	2.43287	3.70213	5.37703	9.15836305140732e-05	0.00142627	1.38998	Inactive-Active
ENSG00000161082.13	CELF5	1.8586	-0.330084	5.37684	9.16156909929738e-05	0.00142627	1.62749	Inactive-Active
ENSG00000138172.11	CALHM2	-1.23681	3.54788	-5.37668	9.16424854499748e-05	0.00142627	1.50642	Inactive-Active
ENSG00000132437.18	DDC	1.99027	5.17359	5.3765	9.16724921811436e-05	0.00142627	1.25474	Inactive-Active
ENSG00000198160.15	MIER1	0.665593	6.52983	5.37571	9.18037136938663e-05	0.00142759	1.1635	Inactive-Active
ENSG00000128422.17	KRT17	-5.55268	-0.341574	-5.3747	9.19746538253967e-05	0.00142858	1.50118	Inactive-Active
ENSG00000224259.7	LINC01133	1.65953	5.22102	5.37455	9.19991095521977e-05	0.00142858	1.25	Inactive-Active
ENSG00000105928.16	GSDME	-1.66415	1.15161	-5.37451	9.20065607755882e-05	0.00142858	1.65306	Inactive-Active
ENSG00000225492.6	GBP1P1	-1.62407	0.916473	-5.37314	9.22358654934811e-05	0.00143142	1.65084	Inactive-Active
ENSG00000184349.14	EFNA5	1.18098	2.54171	5.37278	9.22968637182176e-05	0.00143165	1.53637	Inactive-Active
ENSG00000258471.2	AL161668.3	2.47379	-1.83359	5.37244	9.23548496280121e-05	0.00143183	1.45241	Inactive-Active
ENSG00000185973.12	TMLHE	0.768481	3.2166	5.37129	9.25482708303625e-05	0.0014341	1.46957	Inactive-Active
ENSG00000073861.3	TBX21	-2.1623	0.658988	-5.36991	9.2783289056087e-05	0.00143702	1.64358	Inactive-Active
ENSG00000164237.9	CMBL	1.69375	7.05883	5.36854	9.30154943426155e-05	0.00143989	1.09578	Inactive-Active
ENSG00000280032.1	AP002800.1	2.39776	0.292806	5.36815	9.30813689810496e-05	0.00144019	1.64226	Inactive-Active
ENSG00000072042.13	RDH11	-0.851771	5.47142	-5.3671	9.32600180370015e-05	0.00144143	1.24471	Inactive-Active
ENSG00000134917.10	ADAMTS8	-1.8535	0.776831	-5.36706	9.32675321734664e-05	0.00144143	1.63817	Inactive-Active
ENSG00000177943.14	MAMDC4	0.972559	4.86441	5.36686	9.33016023369358e-05	0.00144143	1.28174	Inactive-Active
ENSG00000015285.11	WAS	-1.72056	4.22237	-5.36574	9.34937486853908e-05	0.00144307	1.40738	Inactive-Active
ENSG00000092051.17	JPH4	-1.9571	-0.692631	-5.36569	9.35015739900619e-05	0.00144307	1.56002	Inactive-Active
ENSG00000106952.8	TNFSF8	-1.84515	2.26275	-5.36486	9.36429731029185e-05	0.00144437	1.60521	Inactive-Active
ENSG00000260027.5	HOXB7	0.813202	4.52792	5.36465	9.36797962369798e-05	0.00144437	1.30846	Inactive-Active
[truncated: 28,822 more rows]
