# Supplementary material for: PGLYRP-1 mediated intracellular peptidoglycan detection promotes mucosal protection
Source: Research Square preprint supplement (doi:10.21203/rs.3.rs-5118704/v1), 2024-10-14
Supplement: Supplementary file 9 [file 62c95de22f6f14412cab0a29.xlsx]

## Sheet: Supplemental table 5 heatmap_de
	WT_UT	WT_MDP	WT_GMTP	PG1_MDP	PG1_GMTP	PG1_0
Bend6	-0.728413	-1.00712	0.113772	-1.27255	-1.47546	-1.62889
Mitd1	3.26413	4.48658	4.39103	4.96001	4.08795	3.5748
Cflar	6.81445	7.50324	7.57141	7.69972	7.01083	6.8531
Serpinb2	-0.962001	-0.813019	0.468102	-0.889332	-3.3153	-1.4573
Lad1	-2.24888	-1.05483	0.213335	-0.639334	-3.02878	-3.26915
Tor3a	7.55684	8.77521	8.47652	8.93458	8.22555	7.69952
Il15ra	1.61983	2.97013	3.0503	3.45226	2.43997	2.02384
Slc2a6	5.28719	7.01003	7.17996	7.10185	6.13398	5.49727
Gm10134	1.42588	2.88194	2.95956	3.07254	2.37715	1.96873
Ralgds	4.73859	5.0233	6.22721	5.04491	5.21549	4.98929
Ptges	1.7175	2.90949	2.95616	2.72037	1.7497	1.60264
Traf1	3.54063	4.75149	4.70113	4.57776	3.60017	3.10559
Gpd2	4.44689	4.69449	5.0675	4.65611	4.5462	4.53419
Gca	2.40836	3.31095	3.42883	4.03492	2.8765	2.65303
Kcnh7	-1.44714	-0.387798	-0.474979	0.508218	-1.23191	-1.15182
Tcp11l1	3.75103	3.91384	4.30977	4.13259	3.94635	3.8115
Rasgrp1	-0.330764	2.18969	2.52595	2.86306	0.182824	-0.205328
AA467197	0.152568	1.41952	0.867824	1.91823	-0.735914	-0.201058
Gm14023	-2.50139	-2.41622	-2.70587	-2.22969	-2.36206	-2.0163
Il1a	0.320021	0.908025	2.66592	0.693196	0.76608	0.785825
Il1b	-0.38028	2.14562	5.18082	1.66796	0.200948	-0.460468
Flrt3	0.170037	1.7161	1.43913	1.52093	0.145445	-0.652409
Sdc4	6.52417	6.34174	7.26154	6.50362	6.70341	6.58334
Car13	5.01637	5.6381	5.51727	5.72868	5.3122	5.12419
Car2	-0.158592	1.17143	0.687263	1.22151	-0.638775	-0.267169
Siah2	3.3409	3.52516	3.88298	3.38285	3.48879	3.43451
Il12a	-8.02257	-6.20957	-2.03252	-7.8432	-6.17926	-7.98333
Rapgef2	5.05964	5.86353	5.76822	6.22133	5.534	5.24123
Tlr2	6.04715	6.90484	7.69898	6.66185	6.67728	6.22364
I830077J02Rik	2.76197	3.61568	3.63275	4.07235	3.30855	2.94032
Psma5	6.00977	6.54352	6.44481	6.70178	6.2051	6.15096
Gbp5	3.22777	5.72411	6.33625	6.88041	4.7277	4.17479
Glipr2	0.635377	1.74292	1.78017	2.18237	1.2017	0.868257
Lpar1	-0.517367	0.825442	1.01783	0.960916	-0.869609	-1.18914
Ifnb1	-4.58738	-1.52599	-2.33184	-1.36747	-3.66382	-3.87617
Stk40	4.57593	4.67947	5.14133	4.60624	4.73659	4.68475
Rnf19b	6.91935	7.75833	7.74771	7.83306	7.25472	6.99284
Marcksl1	4.29007	4.42552	6.41002	4.66383	4.7913	4.21755
Lck	-1.70007	-1.11928	-0.0740639	-2.39314	-2.35817	-1.91467
Xkr8	3.07575	3.5346	3.72414	3.65813	3.16768	3.09771
Smpdl3b	2.48712	4.20447	3.63638	4.28626	2.92483	2.194
Sfn	1.7612	1.809	2.44188	1.63583	1.64263	1.86101
Il6	-6.8616	-5.04861	-1.00636	-4.83202	-5.28355	-6.39836
Cxcl3	-8.02257	-4.46984	-0.73663	-2.91655	-3.07829	-3.33947
Gfi1	-6.4376	-4.94538	-2.5377	-4.06208	-4.77558	-6.82236
Mfsd7a	3.62025	4.79	4.64869	4.6906	4.14391	3.78617
Naa25	4.82121	5.86008	5.46205	6.23996	5.28262	4.87184
Orai2	4.92258	5.76233	5.64792	5.73228	5.24723	4.99704
Cycs	5.73922	6.56186	6.27574	6.66691	5.83272	5.64556
Ggct	2.02823	2.95813	2.76587	2.95196	2.37954	2.49102
Tnip3	5.99371	5.76269	6.52094	5.77098	5.76132	5.46353
Mthfd2	3.81551	5.43695	4.83207	5.82031	4.27242	3.69117
Cd69	0.701803	2.67999	3.35048	3.54616	1.39292	1.12235
Tarm1	-2.25517	-0.366573	0.90371	-0.433684	-3.85733	-2.17116
Relb	4.89359	5.46264	5.95889	5.39397	5.26034	4.94098
Nectin2	3.62408	4.12565	4.60366	3.71703	3.54364	3.46984
Pou2f2	6.50127	6.73379	7.25261	7.03321	6.70623	6.43893
Spint2	-1.61317	0.345753	0.810034	0.356264	-0.882062	-1.50233
Il4i1	-5.64512	-4.62461	-5.22727	-5.64704	-6.86852	-5.41868
Saa3	4.58132	7.63813	7.92374	7.78822	5.32101	4.17048
Nupr1	3.04529	4.70685	4.62353	5.2368	3.76027	3.07448
Slc25a22	4.59343	5.50308	5.48931	5.97501	5.21243	4.76518
Nrg1	-3.37411	-2.19817	-0.960411	-2.33934	-2.96936	-3.18244
Acsl1	5.96697	7.87496	7.82962	7.6204	6.13303	5.83426
Gm45244	-4.90816	-2.71785	-3.11024	-3.50876	-6.29976	-4.07644
Ccl22	-1.17511	1.19983	2.72038	1.79124	0.0719355	-0.180803
Ccl17	-6.17235	-6.89883	-2.63904	-5.52127	-8.02948	-6.39836
Psmb10	6.58898	7.94863	7.62279	8.18986	7.40379	7.05416
Lcat	-2.73716	-1.96103	-1.43254	-2.06279	-2.26355	-2.34672
Rasgrf1	-8.02257	-3.95263	-2.6261	-5.03585	-4.5943	-6.25361
Ust	3.28647	3.19126	4.1336	3.41121	3.56453	3.25688
Stx11	2.90144	4.04609	4.05796	4.23092	3.57846	3.10948
Txlnb	-1.61959	-2.21326	-0.334285	-2.06855	-2.32931	-2.54315
Sbno2	6.71612	7.08131	7.60478	7.35642	6.95518	6.80409
Efna2	-2.61048	-2.4499	-1.01341	-2.80948	-1.84264	-2.25953
Dram1	6.43397	6.77827	7.36542	6.62416	6.37652	6.22897
Il12b	-3.65015	-1.31068	3.34596	-0.964141	-2.38534	-3.96937
Nlgn2	2.89852	3.17562	3.60269	3.28472	3.24185	3.05958
Cxcl16	7.74046	8.63032	8.42625	8.39622	7.91345	7.49609
Zmynd15	3.72774	4.40644	4.23884	4.6591	4.17178	3.52885
Nos2	1.3718	4.4934	3.57864	4.425	0.791161	0.800581
Slfn2	8.47215	9.42963	9.35584	9.69712	9.12253	8.82365
Gm11613	2.10511	2.33023	2.96506	2.3507	2.19076	2.30807
Socs3	0.351577	1.20069	5.02797	2.5841	0.669127	0.51582
Nfkbia	5.44625	6.06945	6.78626	6.30254	5.82761	5.4607
Arg2	-1.40974	-0.120729	0.740857	0.138666	-0.645776	-0.623819
Gm48780	-5.13189	-4.27867	-5.74051	-5.09727	-4.7148	-5.78717
Susd6	7.7234	7.96014	8.50581	8.2269	8.07825	7.89485
Batf	2.24187	2.55293	3.16266	2.64594	2.43295	2.28389
Nfil3	2.73074	3.15891	3.90701	3.06894	3.21326	3.32925
Glrx	5.9075	6.66256	6.55407	6.87581	5.76294	5.28705
Itga1	0.26277	0.718444	1.45515	-0.0643635	0.126403	-0.0317735
Parp8	5.19872	5.93013	5.9242	6.07899	5.69104	5.39875
Gm36079	-0.638861	0.108175	0.44113	0.249228	0.145411	0.21917
Slc7a8	6.45203	7.20122	7.22065	7.15056	6.64142	6.42278
Psme2	6.80419	8.23504	7.87542	8.33035	7.55861	7.17287
Lacc1	6.72259	7.38326	7.36834	7.71853	7.12581	6.85747
Acod1	4.538	8.08997	8.262	8.32991	5.83551	4.76169
Trib1	4.6006	4.46925	5.09219	4.68394	4.75121	4.64226
Apol7c	-0.73583	1.53266	1.67957	1.93419	0.793535	-0.618118
Mapk11	-0.0137804	-0.418771	0.861464	0.12248	-0.1958	-0.713111
Rnd1	-0.503427	0.335683	0.557471	0.853223	-0.0481114	-0.65202
Gpr84	-0.591416	1.13108	2.82951	1.14011	-0.202736	-0.897855
Zfp263	6.20817	6.49458	6.85045	6.5217	6.28932	6.07935
Atf7ip2	-2.02521	-2.93051	-0.732954	-2.40456	-3.16808	-2.87556
Socs1	0.683054	1.98944	2.00236	2.35021	1.36493	0.964547
Cebpd	3.3725	3.79239	4.62999	3.19211	3.36864	3.19892
Mir155hg	-4.04838	-3.41133	-2.18258	-3.04046	-4.13553	-6.39836
Pde10a	-3.97619	-2.4499	-1.45326	-5.09727	-3.27856	-3.4174
1700023B13Rik	-1.12136	-0.766517	-0.596971	-0.352439	-0.525375	-1.00618
Tap2	5.66758	6.62588	6.48486	6.74928	6.08039	5.80054
Gm15821	-2.93573	-2.69371	-2.52644	-1.94093	-2.96034	-2.48792
Tnf	3.84829	4.46694	5.26775	4.25054	3.56973	3.19827
Flot1	5.48941	5.70135	6.07262	5.94811	5.66214	5.75678
Nfkbie	4.3319	4.63239	5.57753	4.52558	4.4008	4.14787
Foxp4	3.49246	3.95137	4.56953	3.34673	3.30756	3.49155
Cd14	8.34605	8.16044	9.17685	7.10127	7.79311	7.76261
Lipg	-0.261995	1.0322	0.940092	1.61526	-1.05946	-0.772524
Cdc42ep2	1.57994	2.26757	3.08685	2.20677	2.00846	1.82325
Batf2	2.38773	4.02985	3.8151	4.5744	3.36365	2.87511
Ehd1	5.93881	5.99895	7.02025	5.9076	6.04628	5.93261
Prdx5	7.40454	9.02217	8.4452	9.13909	8.04735	7.7207
Syt7	-5.97883	-3.6139	-1.60357	-4.6385	-4.13553	-4.97214
Ptgdr2	-6.61889	-6.89883	-6.53299	-6.68224	-6.44452	-6.82236
Ccdc86	4.65657	5.87987	5.70537	5.99488	5.3765	4.88542
Ms4a6d	7.20045	8.8167	8.55663	9.25547	7.91641	7.51084
Gda	4.27845	4.86996	4.82505	4.89424	4.36408	4.10256
Pcgf5	4.31996	4.90206	4.75874	4.98352	4.63605	4.3989
Nfkb2	6.06198	6.42487	7.03825	6.50269	6.30301	6.04697
Psd	2.10307	2.08263	3.31099	1.68595	2.1352	2.11115
Atrnl1	3.26162	3.94462	4.8659	3.70202	3.8419	3.79574
Gdpd2	-5.45792	-4.94538	-2.07108	-7.8432	-4.91507	-3.93695
Gm14866	-7.23008	-6.10634	-5.22727	-7.05072	-8.02948	-6.82236
