# Supplementary material for: PGLYRP-1 mediated intracellular peptidoglycan detection promotes mucosal protection
Source: Research Square preprint supplement (doi:10.21203/rs.3.rs-5118704/v1), 2024-10-14
Supplement: Supplementary file 10 [file 7e453a4f73dcf99c57b85bc9.xlsx]

## Sheet: Supplemental table 7 heatmap_PG
	WT_MDP	PG1_MDP	NOD2_MDP	GEFH1_MDP
Fam72a	2.13897	3.22966	0.503352	1.57151
Ifi206	6.64246	7.58432	4.21636	5.37271
Ifi213	5.99446	6.94842	3.84016	4.93794
Ifi209	8.53958	9.21809	7.06393	7.39543
Ifi208	5.4766	6.61261	2.77061	2.37155
Ifi204	9.05208	9.6187	8.10823	8.33255
Ifi211	8.22685	8.69205	6.58053	7.09551
Ifi205	4.92126	5.96311	1.96523	2.57886
Il15ra	2.97013	3.45226	1.94313	1.94592
Gbgt1	2.77003	2.85971	1.32278	2.29677
Gm10134	2.88194	3.07254	1.56766	2.09314
Ass1	8.00668	7.55956	5.01275	6.15718
Lhx2	-0.676189	0.952258	-1.68147	-1.17102
Rasgrp1	2.18969	2.86306	-2.05179	-0.702173
Zbp1	7.78604	8.40865	5.74736	6.40882
Cp	3.93674	5.0842	2.71547	4.22098
Tnfsf10	3.35825	4.47697	2.28964	2.1377
Gbp5	5.72411	6.88041	3.95972	4.08376
Gbp7	6.0528	7.08858	5.10026	5.05857
Gbp3	7.50791	8.18526	6.39425	5.96596
Gbp2	8.75368	9.7195	7.44532	6.94903
Ifi44	8.04734	8.59508	5.2464	5.9617
Tnfrsf14	5.30741	5.73067	4.99139	5.0415
Isg15	7.54177	8.4734	5.16972	6.09976
Art3	-5.04861	-2.53263	-7.74175	-5.97241
Cxcl10	4.72885	6.01298	2.96724	4.28902
Gbp4	4.35247	5.43843	0.722466	0.976513
Gbp6	4.87248	5.48425	1.48001	2.24437
Oasl2	9.37314	9.60671	8.01058	8.88582
Oasl1	6.47659	7.46262	3.33706	5.28976
Oas2	6.67034	7.21037	5.60623	6.50534
Oas1g	6.48541	6.74971	4.85755	5.63855
Nod1	5.14547	5.81479	4.61659	5.29008
Herc6	6.79419	7.42854	5.39976	5.29322
Usp18	6.89679	7.17935	4.94814	5.39949
Gm44148	-6.89883	-5.52127	-7.74175	-6.74638
Cd69	2.67999	3.54616	0.258236	1.03529
Slco3a1	5.01719	5.93784	3.27833	4.02039
Isg20	5.93101	6.62513	2.92184	4.02145
Trim30b	2.73421	4.09215	0.514332	1.8044
Trim30c	4.73018	5.55656	2.93575	3.50109
Trim30a	8.53725	9.02915	7.63695	7.86794
Trim30d	7.08079	7.58154	5.93394	6.16079
Il21r	5.78451	6.3138	5.29246	5.83717
Nupr1	4.70685	5.2368	2.20993	3.28217
Irf7	10.2845	10.9687	7.55972	9.492
Ddx60	6.36257	7.24227	5.07151	5.50422
Nlrc5	6.53348	6.93735	5.19064	6.01698
Stx11	4.04609	4.23092	3.0201	3.18733
Calhm6	5.22963	6.04085	4.17587	4.54674
Susd2	2.32992	2.20677	-2.12584	-0.337173
Stat2	8.98022	9.38079	7.52636	8.12115
Olfr56	2.12489	3.22135	-0.0294891	1.35924
Tgtp2	6.02073	7.1506	3.60903	4.58355
Ifi47	7.32617	7.94557	5.96966	6.37346
Igtp	6.38949	7.04447	5.08556	5.46113
Irgm2	7.31082	7.91776	6.20763	6.68248
Xaf1	6.49548	7.05139	4.96741	5.66828
Nos2	4.4934	4.425	-1.33878	0.72273
Ccl12	-0.806853	1.65919	-3.5696	-1.30771
Slfn5os	-5.86363	-4.83202	-6.94927	-5.8106
Slfn1	6.9558	8.05427	4.40779	4.77715
Slfn4	3.90747	6.56531	0.863131	1.81621
Arl5c	5.85019	6.21552	5.75665	5.81414
Dhx58os	-2.41854	-1.17251	-2.94273	-2.14936
Dhx58	7.55242	7.84879	6.37543	6.95243
Ifi35	5.88947	6.21828	4.63366	5.2029
Rsad2	8.66428	9.77244	7.07525	6.9643
Cmpk2	8.43157	9.34365	7.11401	7.26804
Aoah	7.60829	7.88234	6.29999	6.78687
Pnp	6.31844	6.76912	5.37625	5.65409
Pnp2	2.61201	3.08605	1.4068	1.75685
Phf11b	7.12504	8.01823	5.45193	5.80137
Phf11d	7.07631	7.75725	5.07138	5.92357
Ly6i	3.77328	4.20221	-2.08616	0.68535
Apol7c	1.53266	1.93419	-0.125861	0.0332698
AC113595.1	0.101922	1.06344	-1.10376	0.62285
Apobec3	6.26052	6.88864	5.29029	6.31683
Mefv	4.68711	5.24252	3.98272	4.42113
Rtp4	8.51148	8.66891	7.48993	7.97374
Cfb	4.84327	5.05295	-0.153101	2.32751
Enpp4	4.15799	5.26519	3.11934	3.68178
Clic5	4.34513	5.44333	0.524798	0.264839
Gm4951	4.56791	5.76668	2.51873	4.04911
Iigp1	5.48276	7.02712	2.65627	3.652
Batf2	4.02985	4.5744	2.82136	3.33026
AW112010	7.04591	7.78116	4.10442	4.7263
Ms4a4c	8.67656	9.46047	5.02913	5.86909
Ms4a6d	8.8167	9.25547	7.60855	7.84643
Gm47242	3.78152	4.78682	1.12782	1.81182
Ifit2	10.4608	11.3326	8.62575	8.72269
Ifit3	9.18673	9.81118	7.23921	8.0201
Ifit1bl1	7.65654	8.80905	4.62483	3.86022
Ifit3b	6.89683	7.57835	4.56902	5.71305
Ifit1	7.90298	8.65119	5.78502	6.48282
