# Supplementary material for: PGLYRP-1 mediated intracellular peptidoglycan detection promotes mucosal protection
Source: Research Square preprint supplement (doi:10.21203/rs.3.rs-5118704/v1), 2024-10-14
Supplement: Supplementary file 11 [file 84ee9521a9ceadafb1f5ab6b.xlsx]

## Sheet: Sheet1
PGLYRP-1/SEC61b/GM130 colocalization/ %of RO1 material colocalized/Pearson's coefficient in ROI volume
Cell	% SEC61b	% PGLYRP-1	P-Co		% PGYRP-1	% GM130	P-Co
1	39.44	59.07	0.8527		5.3	35.79	0.3748
2	67.49	76.46	0.8619		4.55	36.54	0.291
3	54.58	45.11	0.685		1.45	35.17	0.1222
4	62.36	58.24	0.9144		4.74	8.8	0.4273
5	81.07	69.6	0.7632		22.41	21.99	0.634
6	32.06	45.98	0.682		12.84	9.5	0.472
7	38.46	45.17	0.7272		16.26	11	0.447
8	62.31	57.74	0.7606		14.24	14.91	0.5004
9	53.06	66.23	0.794		21.82	9.46	0.5505
10	49.08	70.84	0.7496		25.86	19.91	0.6791
Mean	53.99	59.44	0.7791		12.95	20.31	0.4498
STD	14.96	11.37	0.07691		8.668	11.59	0.1627
SEM	4.73	3.596	0.02432		2.741	3.666	0.05147
