# Supplementary material for: PGLYRP-1 mediated intracellular peptidoglycan detection promotes mucosal protection
Source: Research Square preprint supplement (doi:10.21203/rs.3.rs-5118704/v1), 2024-10-14
Supplement: Supplementary file 12 [file 8bc4b70a33bf263b3f8fa08c.xlsx]

## Sheet: Sheet1
GeneID	GeneSymbol	logFC	AveExpr	t	P.Value	adj.P.Val	B	Contrast
ENSMUSG00000040026.8	Saa3	3.34283	5.4037	43.986	5.51140267237005e-15	1.22975927828593e-10	23.9482	WT_GMTP-WT_UT
ENSMUSG00000028270.12	Gbp2	2.43013	7.64735	33.3593	1.65033921555082e-13	1.25689679329489e-09	21.3027	WT_GMTP-WT_UT
ENSMUSG00000040253.15	Gbp7	2.72429	5.52666	33.2949	1.68990739922228e-13	1.25689679329489e-09	21.171	WT_GMTP-WT_UT
ENSMUSG00000047592.17	Nxpe5	2.59518	4.9939	31.4378	3.41455861677306e-13	1.71831988148729e-09	20.5001	WT_GMTP-WT_UT
ENSMUSG00000000386.16	Mx1	2.08112	5.70478	31.0016	4.0516880383015e-13	1.71831988148729e-09	20.4134	WT_GMTP-WT_UT
ENSMUSG00000076431.4	Sox4	-1.67092	4.40945	-30.6707	4.62058857568403e-13	1.71831988148729e-09	20.1452	WT_GMTP-WT_UT
ENSMUSG00000075010.5	AW112010	2.33349	5.03862	30.1306	5.74268755694248e-13	1.83052267797225e-09	20.0459	WT_GMTP-WT_UT
ENSMUSG00000074896.3	Ifit3	2.25401	7.98333	28.825	9.87115187200488e-13	2.75318764650056e-09	19.6713	WT_GMTP-WT_UT
ENSMUSG00000018819.10	Lsp1	-1.77334	5.27041	-27.7933	1.54072387043312e-12	3.44453054121927e-09	19.1722	WT_GMTP-WT_UT
ENSMUSG00000021322.8	Aoah	1.44964	6.74166	27.7025	1.60352683721154e-12	3.44453054121927e-09	19.1941	WT_GMTP-WT_UT
ENSMUSG00000031722.10	Hp	2.57356	3.10504	27.4398	1.80127121683864e-12	3.44453054121927e-09	18.59	WT_GMTP-WT_UT
ENSMUSG00000000957.11	Mmp14	2.04983	6.32816	27.2918	1.92412873069298e-12	3.44453054121927e-09	19.0124	WT_GMTP-WT_UT
ENSMUSG00000028037.13	Ifi44	2.40813	6.32089	26.9895	2.20416222726143e-12	3.44453054121927e-09	18.8846	WT_GMTP-WT_UT
ENSMUSG00000062488.9	Ifit3b	2.03214	5.58084	26.9367	2.2574885262914e-12	3.44453054121927e-09	18.8358	WT_GMTP-WT_UT
ENSMUSG00000028268.14	Gbp3	2.18782	6.60301	26.8806	2.31559889384166e-12	3.44453054121927e-09	18.8451	WT_GMTP-WT_UT
ENSMUSG00000006818.5	Sod2	1.86856	6.5018	26.5681	2.67048096603974e-12	3.7241526122028e-09	18.7081	WT_GMTP-WT_UT
ENSMUSG00000003617.16	Cp	2.06516	3.53847	26.0959	3.32283358722916e-12	4.3613168136379e-09	18.2234	WT_GMTP-WT_UT
ENSMUSG00000071042.12	Rasgrp3	-1.79589	4.94685	-25.2483	4.96750889970769e-12	5.21075955404025e-09	18.065	WT_GMTP-WT_UT
ENSMUSG00000082292.3	Gm12250	1.91434	5.34492	25.2179	5.04096756053448e-12	5.21075955404025e-09	18.0716	WT_GMTP-WT_UT
ENSMUSG00000016283.13	H2-M2	1.86949	5.87325	25.179	5.1364020292214e-12	5.21075955404025e-09	18.072	WT_GMTP-WT_UT
ENSMUSG00000034459.8	Ifit1	2.48642	6.64997	25.1016	5.33248291285538e-12	5.21075955404025e-09	18.0523	WT_GMTP-WT_UT
ENSMUSG00000045932.12	Ifit2	2.55818	9.30263	25.1016	5.33269371987227e-12	5.21075955404025e-09	18.0716	WT_GMTP-WT_UT
ENSMUSG00000078920.3	Ifi47	2.04561	6.43011	25.0867	5.37119480764244e-12	5.21075955404025e-09	18.0416	WT_GMTP-WT_UT
ENSMUSG00000020638.8	Cmpk2	1.80971	7.67576	24.8502	6.02718690308554e-12	5.39403157622161e-09	17.9458	WT_GMTP-WT_UT
ENSMUSG00000105504.4	Gbp5	3.10932	4.85155	24.766	6.28124083394862e-12	5.39403157622161e-09	17.839	WT_GMTP-WT_UT
ENSMUSG00000030208.15	Emp1	-1.16456	7.61139	-24.7647	6.28534132486721e-12	5.39403157622161e-09	17.9047	WT_GMTP-WT_UT
ENSMUSG00000025498.15	Irf7	1.5611	8.77935	24.5967	6.82773133310776e-12	5.46752985669121e-09	17.8304	WT_GMTP-WT_UT
ENSMUSG00000009585.18	Apobec3	1.24095	5.79928	24.5868	6.86106018856065e-12	5.46752985669121e-09	17.7939	WT_GMTP-WT_UT
ENSMUSG00000027514.14	Zbp1	2.37069	6.49587	24.3601	7.67905271914852e-12	5.90836908008141e-09	17.6993	WT_GMTP-WT_UT
ENSMUSG00000056758.14	Hmga2	-1.65933	4.07198	-24.2573	8.08402621659647e-12	6.0126292323639e-09	17.5304	WT_GMTP-WT_UT
ENSMUSG00000035493.10	Tgfbi	1.54482	8.67405	24.141	8.57017554637833e-12	6.13549267966153e-09	17.6087	WT_GMTP-WT_UT
ENSMUSG00000030560.17	Ctsc	1.04492	8.07397	24.0887	8.79916487021776e-12	6.13549267966153e-09	17.5809	WT_GMTP-WT_UT
ENSMUSG00000035692.7	Isg15	2.41035	6.17565	23.4281	1.23331979501728e-11	8.33911048067288e-09	17.2367	WT_GMTP-WT_UT
ENSMUSG00000078763.2	Slfn1	2.43087	5.23489	23.1452	1.4291369835014e-11	9.3789216214314e-09	17.0749	WT_GMTP-WT_UT
ENSMUSG00000036526.8	Card11	-1.59655	5.68205	-22.9733	1.56444160011499e-11	9.73208937673158e-09	16.9983	WT_GMTP-WT_UT
ENSMUSG00000026104.14	Stat1	1.20753	6.2195	22.9246	1.60514453001537e-11	9.73208937673158e-09	16.9813	WT_GMTP-WT_UT
ENSMUSG00000073555.1	Gm4951	1.91132	3.57672	22.8582	1.66263642768366e-11	9.73208937673158e-09	16.7916	WT_GMTP-WT_UT
ENSMUSG00000024679.10	Ms4a6d	1.35618	8.00888	22.8323	1.68562255177865e-11	9.73208937673158e-09	16.9443	WT_GMTP-WT_UT
ENSMUSG00000023341.15	Mx2	1.71396	3.58391	22.8152	1.70103296595048e-11	9.73208937673158e-09	16.772	WT_GMTP-WT_UT
ENSMUSG00000027995.10	Tlr2	1.65201	6.51136	22.452	2.06621102017427e-11	1.13671331365258e-08	16.7375	WT_GMTP-WT_UT
ENSMUSG00000037447.16	Arid5a	1.67882	3.54336	22.4319	2.08870370903759e-11	1.13671331365258e-08	16.5768	WT_GMTP-WT_UT
ENSMUSG00000020641.16	Rsad2	1.94818	7.8281	21.8579	2.85872572511151e-11	1.50297044461361e-08	16.4227	WT_GMTP-WT_UT
ENSMUSG00000028927.6	Padi2	-1.3215	4.94121	-21.8325	2.89917464033408e-11	1.50297044461361e-08	16.3839	WT_GMTP-WT_UT
ENSMUSG00000018796.13	Acsl1	1.86294	6.53424	21.7927	2.96377446165908e-11	1.50297044461361e-08	16.3834	WT_GMTP-WT_UT
ENSMUSG00000041827.15	Oasl1	1.82579	4.89285	21.5044	3.48171109942709e-11	1.72638710581148e-08	16.2051	WT_GMTP-WT_UT
ENSMUSG00000054072.12	Iigp1	2.14031	4.02402	21.452	3.58602501598657e-11	1.73945600395018e-08	16.1319	WT_GMTP-WT_UT
ENSMUSG00000017830.15	Dhx58	1.28834	6.79796	21.1507	4.25446791141946e-11	2.01978601079792e-08	16.0272	WT_GMTP-WT_UT
ENSMUSG00000047945.6	Marcksl1	2.12129	4.22583	21.0946	4.39301844163768e-11	2.02892215933448e-08	15.9529	WT_GMTP-WT_UT
ENSMUSG00000026536.9	Ifi211	1.54241	7.22937	21.0275	4.56547584777647e-11	2.02892215933448e-08	15.9578	WT_GMTP-WT_UT
ENSMUSG00000073489.6	Ifi204	1.1959	8.47493	21.0006	4.6364545701308e-11	2.02892215933448e-08	15.9425	WT_GMTP-WT_UT
ENSMUSG00000030107.10	Usp18	1.565	5.62035	20.9763	4.70171351059697e-11	2.02892215933448e-08	15.9234	WT_GMTP-WT_UT
ENSMUSG00000024675.19	Ms4a4c	2.10704	6.41231	20.9665	4.7283624920626e-11	2.02892215933448e-08	15.9218	WT_GMTP-WT_UT
ENSMUSG00000046245.13	Pilra	1.37823	4.41842	20.8574	5.03571459550427e-11	2.08856695107999e-08	15.8314	WT_GMTP-WT_UT
ENSMUSG00000033538.13	Casp4	1.50479	5.30045	20.851	5.05456977359921e-11	2.08856695107999e-08	15.8491	WT_GMTP-WT_UT
ENSMUSG00000070034.13	Sp110	1.05616	6.45273	20.7747	5.28329674992128e-11	2.14338546147261e-08	15.8119	WT_GMTP-WT_UT
ENSMUSG00000027398.13	Il1b	5.55772	0.441744	20.7092	5.4884303028604e-11	2.18684545263793e-08	14.3208	WT_GMTP-WT_UT
ENSMUSG00000078921.3	Tgtp2	2.2044	4.65966	20.626	5.76165998619229e-11	2.25543718020892e-08	15.7092	WT_GMTP-WT_UT
ENSMUSG00000033316.14	Galnt9	-1.69747	3.76652	-20.5081	6.17410561031415e-11	2.37522100832654e-08	15.5934	WT_GMTP-WT_UT
ENSMUSG00000039942.15	Ptger4	1.12207	5.25954	20.3928	6.60834732782746e-11	2.49918735467482e-08	15.5852	WT_GMTP-WT_UT
ENSMUSG00000023367.14	Tmem176a	1.50292	5.14934	20.3257	6.87632478875947e-11	2.5571905835265e-08	15.545	WT_GMTP-WT_UT
ENSMUSG00000022126.6	Acod1	3.72481	5.84823	20.2498	7.19328736727587e-11	2.5930406348065e-08	15.5046	WT_GMTP-WT_UT
ENSMUSG00000030403.9	Vasp	1.19639	7.49983	20.2471	7.20515033200391e-11	2.5930406348065e-08	15.5029	WT_GMTP-WT_UT
ENSMUSG00000069874.7	Irgm2	1.31982	6.68985	20.1335	7.71047367886457e-11	2.68956479870861e-08	15.4361	WT_GMTP-WT_UT
ENSMUSG00000004891.16	Nes	-1.64801	3.73906	-20.1326	7.71443316081887e-11	2.68956479870861e-08	15.3793	WT_GMTP-WT_UT
ENSMUSG00000038352.15	Arl5c	1.15776	5.71224	20.0642	8.03749534619064e-11	2.75908667168541e-08	15.3943	WT_GMTP-WT_UT
ENSMUSG00000036067.12	Slc2a6	1.89346	6.20799	19.9585	8.56522153052727e-11	2.8956937577372e-08	15.3316	WT_GMTP-WT_UT
ENSMUSG00000066152.11	Slc31a2	1.05074	7.03457	19.8902	8.92646283693947e-11	2.96319630024573e-08	15.2893	WT_GMTP-WT_UT
ENSMUSG00000024677.13	Ms4a6b	1.26609	7.54177	19.8711	9.03049112251644e-11	2.96319630024573e-08	15.2767	WT_GMTP-WT_UT
ENSMUSG00000053175.17	Bcl3	2.10131	4.49983	19.8039	9.40581159501147e-11	3.01262404107394e-08	15.2271	WT_GMTP-WT_UT
ENSMUSG00000039809.10	Gabbr2	-1.9867	2.30602	-19.796	9.45115774997427e-11	3.01262404107394e-08	14.9156	WT_GMTP-WT_UT
ENSMUSG00000102418.1	Sh2d1b1	-1.23515	3.94195	-19.7649	9.63182189806776e-11	3.02696960579699e-08	15.1816	WT_GMTP-WT_UT
ENSMUSG00000046031.7	Calhm6	1.63417	4.61463	19.6286	1.04684019565547e-10	3.24418684523063e-08	15.1247	WT_GMTP-WT_UT
ENSMUSG00000029561.17	Oasl2	1.28252	8.548	19.4514	1.1675104241836e-10	3.56858357463133e-08	15.0165	WT_GMTP-WT_UT
ENSMUSG00000053113.3	Socs3	4.67384	1.11028	19.3864	1.21542831174533e-10	3.66484485405048e-08	14.1936	WT_GMTP-WT_UT
ENSMUSG00000040296.15	Ddx58	1.38668	7.40725	19.3406	1.25050253091363e-10	3.72032839630345e-08	14.9501	WT_GMTP-WT_UT
ENSMUSG00000060550.16	H2-Q7	1.7425	5.39641	19.3131	1.27207612129711e-10	3.73447173563504e-08	14.9379	WT_GMTP-WT_UT
ENSMUSG00000032000.17	Birc3	1.12299	6.28795	19.2922	1.28872999437054e-10	3.73447173563504e-08	14.9235	WT_GMTP-WT_UT
ENSMUSG00000079419.4	Ms4a6c	0.987828	7.5752	19.1764	1.38540875631874e-10	3.9631571256077e-08	14.8465	WT_GMTP-WT_UT
ENSMUSG00000039899.5	Fgl2	1.24347	7.64351	19.0799	1.47197766804215e-10	4.15749844392716e-08	14.7852	WT_GMTP-WT_UT
ENSMUSG00000022587.14	Ly6e	0.962358	10.0819	18.934	1.61408074592463e-10	4.50187296047704e-08	14.6878	WT_GMTP-WT_UT
ENSMUSG00000029810.15	Tmem176b	1.22161	6.55101	18.8564	1.69563168989789e-10	4.67094196255452e-08	14.6471	WT_GMTP-WT_UT
ENSMUSG00000052776.10	Oas1a	0.983141	7.26343	18.8065	1.7504388557948e-10	4.71201637771126e-08	14.6119	WT_GMTP-WT_UT
ENSMUSG00000090272.9	Mndal	1.14024	7.24526	18.7718	1.78960783100172e-10	4.71201637771126e-08	14.5897	WT_GMTP-WT_UT
ENSMUSG00000078853.8	Igtp	1.47223	5.59408	18.7576	1.8059303051698e-10	4.71201637771126e-08	14.5881	WT_GMTP-WT_UT
ENSMUSG00000037997.12	Parp11	0.960326	5.26051	18.7549	1.80912246444286e-10	4.71201637771126e-08	14.5873	WT_GMTP-WT_UT
ENSMUSG00000025591.6	Tma16	2.15757	3.46769	18.7452	1.82031842635721e-10	4.71201637771126e-08	14.5364	WT_GMTP-WT_UT
ENSMUSG00000033355.6	Rtp4	1.24239	7.87134	18.7308	1.83724924869305e-10	4.71201637771126e-08	14.5606	WT_GMTP-WT_UT
ENSMUSG00000078616.2	Trim30c	2.27746	3.78271	18.6475	1.93808469326211e-10	4.91414588190426e-08	14.4972	WT_GMTP-WT_UT
ENSMUSG00000028874.14	Fgr	1.27947	4.69052	18.5811	2.02277957753611e-10	5.07126749590597e-08	14.476	WT_GMTP-WT_UT
ENSMUSG00000030047.14	Arhgap25	-0.834279	8.18702	-18.552	2.06125612070735e-10	5.10269702281548e-08	14.4431	WT_GMTP-WT_UT
ENSMUSG00000008734.9	Gprc5b	-1.31809	4.92275	-18.5372	2.08105332799807e-10	5.10269702281548e-08	14.4483	WT_GMTP-WT_UT
ENSMUSG00000026012.2	Cd28	-1.09543	6.80968	-18.4834	2.15474908399598e-10	5.1709011945172e-08	14.4045	WT_GMTP-WT_UT
ENSMUSG00000047139.9	Cd24a	-1.85312	3.68295	-18.4831	2.15521808403218e-10	5.1709011945172e-08	14.3891	WT_GMTP-WT_UT
ENSMUSG00000015947.10	Fcgr1	0.902071	9.2285	18.4364	2.22158600089221e-10	5.27343068488381e-08	14.3647	WT_GMTP-WT_UT
ENSMUSG00000027765.6	P2ry1	-1.49253	3.34511	-18.4076	2.26353233230238e-10	5.31644178217506e-08	14.317	WT_GMTP-WT_UT
ENSMUSG00000026656.15	Fcgr2b	0.896198	7.34384	18.3343	2.37437661390712e-10	5.51869431105308e-08	14.3035	WT_GMTP-WT_UT
ENSMUSG00000020661.15	Dnmt3a	-0.940031	9.39409	-18.2829	2.45565096858638e-10	5.64875670742968e-08	14.2627	WT_GMTP-WT_UT
ENSMUSG00000003541.6	Ier3	1.83464	2.72714	18.1928	2.60534454976601e-10	5.93194417744174e-08	14.103	WT_GMTP-WT_UT
ENSMUSG00000046879.7	Irgm1	1.17414	7.65827	18.1323	2.71126419439079e-10	6.11075131004462e-08	14.1675	WT_GMTP-WT_UT
ENSMUSG00000032661.9	Oas3	1.23098	8.99753	18.0958	2.77747738372971e-10	6.14033417450758e-08	14.1383	WT_GMTP-WT_UT
ENSMUSG00000023961.16	Enpp4	1.87975	3.54704	18.0784	2.80975432628971e-10	6.14033417450758e-08	14.1247	WT_GMTP-WT_UT
ENSMUSG00000038507.6	Parp12	1.05176	7.29525	18.0652	2.83434026576905e-10	6.14033417450758e-08	14.1245	WT_GMTP-WT_UT
ENSMUSG00000022906.15	Parp9	1.01074	7.16714	18.0652	2.83446609588258e-10	6.14033417450758e-08	14.1252	WT_GMTP-WT_UT
ENSMUSG00000040033.16	Stat2	1.29302	8.09386	18.0425	2.87733563500425e-10	6.17326827152402e-08	14.1052	WT_GMTP-WT_UT
ENSMUSG00000066861.14	Oas1g	1.1681	5.47877	18.0141	2.93214398041562e-10	6.17881986512184e-08	14.103	WT_GMTP-WT_UT
ENSMUSG00000066677.12	Ifi208	2.45743	4.00696	18.0125	2.93530634922653e-10	6.17881986512184e-08	14.1004	WT_GMTP-WT_UT
ENSMUSG00000091649.3	Phf11b	1.29673	6.03401	17.928	3.10516974237899e-10	6.47529462258901e-08	14.0409	WT_GMTP-WT_UT
ENSMUSG00000043263.13	Ifi209	1.64704	7.65708	17.8319	3.311321554082e-10	6.80877630924247e-08	13.9646	WT_GMTP-WT_UT
ENSMUSG00000004105.8	Angptl2	-1.14911	5.92625	-17.8216	3.33411228869717e-10	6.80877630924247e-08	13.97	WT_GMTP-WT_UT
ENSMUSG00000002289.16	Angptl4	-1.68324	3.06597	-17.8116	3.3566324296001e-10	6.80877630924247e-08	13.9134	WT_GMTP-WT_UT
ENSMUSG00000029553.10	Tfec	1.2997	4.35944	17.7518	3.49442218710752e-10	7.02441822170541e-08	13.9327	WT_GMTP-WT_UT
ENSMUSG00000076441.9	Ass1	1.32979	5.94124	17.5911	3.89545121580392e-10	7.76064312305651e-08	13.8128	WT_GMTP-WT_UT
ENSMUSG00000001123.15	Lgals9	0.875659	7.65155	17.5317	4.05624042579823e-10	8.00945952396778e-08	13.7583	WT_GMTP-WT_UT
ENSMUSG00000042333.16	Tnfrsf14	1.10379	5.1582	17.4274	4.35579034472954e-10	8.48105945602699e-08	13.708	WT_GMTP-WT_UT
ENSMUSG00000037405.8	Icam1	1.54833	6.56083	17.4222	4.37109235621881e-10	8.48105945602699e-08	13.6904	WT_GMTP-WT_UT
ENSMUSG00000029366.10	Dck	1.03558	7.09448	17.3394	4.62688751749429e-10	8.89997768774569e-08	13.6282	WT_GMTP-WT_UT
ENSMUSG00000039934.12	Gsap	1.01069	5.5058	17.2951	4.77052667714824e-10	9.09784288437682e-08	13.6126	WT_GMTP-WT_UT
ENSMUSG00000057596.13	Trim30d	1.24626	6.40022	17.2624	4.87926155431012e-10	9.22635280180693e-08	13.5803	WT_GMTP-WT_UT
ENSMUSG00000024308.15	Tapbp	0.930281	9.33598	17.2438	4.94233484511031e-10	9.26708549570977e-08	13.5503	WT_GMTP-WT_UT
ENSMUSG00000023349.14	Clec4n	1.21397	3.66151	17.2023	5.08668538425892e-10	9.45826758158077e-08	13.5523	WT_GMTP-WT_UT
ENSMUSG00000028525.16	Pde4b	1.47188	3.72347	17.1736	5.18878615855721e-10	9.50277795379264e-08	13.5346	WT_GMTP-WT_UT
ENSMUSG00000025790.14	Slco3a1	1.88276	4.06179	17.1717	5.19580025260029e-10	9.50277795379264e-08	13.5382	WT_GMTP-WT_UT
ENSMUSG00000021175.15	Cdca7l	-1.01985	4.73437	-17.1315	5.34308176230256e-10	9.69269783432984e-08	13.5074	WT_GMTP-WT_UT
ENSMUSG00000028238.6	Atp6v0d2	-0.81582	9.48828	-17.0991	5.46487599657344e-10	9.83369178318896e-08	13.4473	WT_GMTP-WT_UT
ENSMUSG00000030745.9	Il21r	1.02941	5.36804	17.0722	5.568328605087e-10	9.93968929322449e-08	13.4581	WT_GMTP-WT_UT
ENSMUSG00000007682.6	Dio2	-1.79978	7.0129	-17.022	5.76738274263103e-10	1.0213302471137e-07	13.4046	WT_GMTP-WT_UT
ENSMUSG00000018899.16	Irf1	1.24009	6.69069	16.98	5.93975579545686e-10	1.04357300050417e-07	13.3775	WT_GMTP-WT_UT
ENSMUSG00000037321.17	Tap1	1.03294	7.58643	16.9633	6.00983783861685e-10	1.04763681010201e-07	13.358	WT_GMTP-WT_UT
ENSMUSG00000027955.16	Gask1b	-1.0394	6.51179	-16.8962	6.30016692571392e-10	1.08973352413531e-07	13.3193	WT_GMTP-WT_UT
ENSMUSG00000063268.12	Parp10	1.01452	5.94373	16.8218	6.64043837136163e-10	1.13975462600148e-07	13.2724	WT_GMTP-WT_UT
ENSMUSG00000024659.15	Anxa1	-0.792814	11.3353	-16.7007	7.23687231866826e-10	1.23264375607973e-07	13.1607	WT_GMTP-WT_UT
ENSMUSG00000104713.4	Gbp6	2.52604	2.8281	16.6611	7.44405097726046e-10	1.25832658678494e-07	13.1305	WT_GMTP-WT_UT
ENSMUSG00000032690.16	Oas2	1.08172	6.17149	16.6432	7.53998891391375e-10	1.26496069651246e-07	13.1404	WT_GMTP-WT_UT
ENSMUSG00000115338.2	Pnp	1.29675	5.73994	16.6142	7.69761684358994e-10	1.28176809426136e-07	13.125	WT_GMTP-WT_UT
ENSMUSG00000026222.16	Sp100	0.870471	7.81796	16.5889	7.83864249894895e-10	1.29558244502998e-07	13.0849	WT_GMTP-WT_UT
ENSMUSG00000042349.13	Ikbke	0.835216	7.00195	16.4611	8.59371089550973e-10	1.40993728831992e-07	12.9977	WT_GMTP-WT_UT
ENSMUSG00000030142.10	Clec4e	3.09449	5.08841	16.3676	9.19562197617093e-10	1.49767819820658e-07	12.955	WT_GMTP-WT_UT
ENSMUSG00000035929.11	H2-Q4	1.10813	7.0846	16.3011	9.65083082746002e-10	1.56042745110953e-07	12.8782	WT_GMTP-WT_UT
ENSMUSG00000029798.11	Herc6	1.5479	5.93466	16.2867	9.75251941585955e-10	1.56552493328111e-07	12.8815	WT_GMTP-WT_UT
ENSMUSG00000039304.11	Tnfsf10	1.73606	2.84766	16.256	9.9737258540937e-10	1.58959817844566e-07	12.853	WT_GMTP-WT_UT
ENSMUSG00000056498.13	Tmem154	-0.914361	5.64089	-16.2297	1.01678093679986e-09	1.60903780445499e-07	12.8436	WT_GMTP-WT_UT
ENSMUSG00000045092.8	S1pr1	-0.983011	4.73808	-16.2099	1.03157874286743e-09	1.62095890771837e-07	12.8453	WT_GMTP-WT_UT
ENSMUSG00000054203.7	Ifi205	2.48557	3.50152	16.1886	1.04780979119133e-09	1.63494964131833e-07	12.839	WT_GMTP-WT_UT
ENSMUSG00000079339.7	Ifit1bl1	1.56702	5.50357	16.1684	1.06349093677315e-09	1.64789397723746e-07	12.8002	WT_GMTP-WT_UT
ENSMUSG00000072620.3	Slfn2	0.883707	9.05682	16.15	1.07793953492172e-09	1.65876309260057e-07	12.752	WT_GMTP-WT_UT
ENSMUSG00000056116.18	H2-T22	0.886403	7.76908	16.0532	1.15758361569313e-09	1.76912076828499e-07	12.6857	WT_GMTP-WT_UT
ENSMUSG00000054843.9	Atrnl1	1.60527	4.10579	16.0374	1.17119045424709e-09	1.77028101499347e-07	12.7288	WT_GMTP-WT_UT
ENSMUSG00000033207.7	Mamdc2	-0.950953	7.23001	-16.0339	1.17421050606836e-09	1.77028101499347e-07	12.6759	WT_GMTP-WT_UT
ENSMUSG00000012519.14	Mlkl	1.17748	5.36801	15.9728	1.22859729295502e-09	1.8365650185461e-07	12.6559	WT_GMTP-WT_UT
ENSMUSG00000041936.18	Agrn	1.32821	5.52187	15.9662	1.23463789173089e-09	1.8365650185461e-07	12.648	WT_GMTP-WT_UT
ENSMUSG00000044703.5	Phf11a	1.39205	3.57776	15.9572	1.24299900989152e-09	1.83675741110659e-07	12.6716	WT_GMTP-WT_UT
ENSMUSG00000068245.14	Phf11d	1.51769	5.8212	15.8911	1.30562303849562e-09	1.91660308276005e-07	12.5858	WT_GMTP-WT_UT
ENSMUSG00000036986.16	Pml	0.953749	6.43734	15.8629	1.33340770580296e-09	1.9445964797112e-07	12.555	WT_GMTP-WT_UT
ENSMUSG00000042842.11	Serpinb6b	-1.48255	3.70212	-15.848	1.34837472737974e-09	1.95365488909247e-07	12.5915	WT_GMTP-WT_UT
ENSMUSG00000029009.17	Mthfr	0.936127	6.80048	15.6282	1.59086137435e-09	2.27820016807516e-07	12.3692	WT_GMTP-WT_UT
ENSMUSG00000037849.8	Ifi206	1.89886	5.33675	15.6266	1.5927899709574e-09	2.27820016807516e-07	12.3921	WT_GMTP-WT_UT
ENSMUSG00000022014.15	Epsti1	0.800511	6.92021	15.5947	1.63174064135683e-09	2.31904642870031e-07	12.3417	WT_GMTP-WT_UT
ENSMUSG00000034855.13	Cxcl10	2.50656	4.23506	15.5694	1.66340027135179e-09	2.34907913004256e-07	12.3742	WT_GMTP-WT_UT
ENSMUSG00000028494.12	Plin2	-0.772095	10.1093	-15.44	1.8358861903019e-09	2.57636028705701e-07	12.2021	WT_GMTP-WT_UT
ENSMUSG00000039236.18	Isg20	1.7703	4.08004	15.3811	1.92066715429876e-09	2.67849038836676e-07	12.2331	WT_GMTP-WT_UT
ENSMUSG00000038058.14	Nod1	1.01377	4.95476	15.3452	1.97444501440454e-09	2.73638457182662e-07	12.1822	WT_GMTP-WT_UT
ENSMUSG00000040328.16	Olfr56	2.73225	0.906245	15.2718	2.08959184261802e-09	2.87809029532937e-07	11.7685	WT_GMTP-WT_UT
ENSMUSG00000075602.10	Ly6a	1.17047	4.07878	15.2152	2.18313193338846e-09	2.98847992820225e-07	12.1042	WT_GMTP-WT_UT
ENSMUSG00000051615.14	Rap2a	-0.727508	7.52414	-15.2007	2.20782803417284e-09	3.00385773942065e-07	12.024	WT_GMTP-WT_UT
ENSMUSG00000044350.14	Lacc1	0.645759	7.11841	15.1909	2.2248260435525e-09	3.00863900059314e-07	12.0206	WT_GMTP-WT_UT
ENSMUSG00000112627.1	4933412E12Rik	1.19359	2.70562	15.1694	2.26227344088991e-09	3.04084983654076e-07	12.0544	WT_GMTP-WT_UT
ENSMUSG00000052270.7	Fpr2	2.62533	1.34446	15.1564	2.28518825404548e-09	3.05325781512076e-07	11.8254	WT_GMTP-WT_UT
ENSMUSG00000030748.9	Il4ra	0.966288	6.62919	15.1243	2.34310506971025e-09	3.11200615597885e-07	11.9738	WT_GMTP-WT_UT
ENSMUSG00000026088.15	Mitd1	1.12735	3.93521	15.107	2.37502802149766e-09	3.13573965938919e-07	12.023	WT_GMTP-WT_UT
ENSMUSG00000030921.17	Trim30a	1.1235	7.99856	15.0944	2.39851050148492e-09	3.14811557762548e-07	11.9343	WT_GMTP-WT_UT
ENSMUSG00000000440.12	Pparg	-0.687376	6.40273	-15.0776	2.43017267582329e-09	3.1710200535465e-07	11.9398	WT_GMTP-WT_UT
ENSMUSG00000073491.11	Ifi213	1.9921	4.83298	15.0433	2.49628076546559e-09	3.23834376278103e-07	11.9467	WT_GMTP-WT_UT
ENSMUSG00000021133.9	Susd6	0.782435	7.99498	15.018	2.54646596950435e-09	3.28435232240177e-07	11.8726	WT_GMTP-WT_UT
ENSMUSG00000023947.8	Nfkbie	1.24565	4.27645	14.9819	2.61973660169074e-09	3.35943579273135e-07	11.9147	WT_GMTP-WT_UT
ENSMUSG00000027808.8	Serp1	0.652443	8.7118	14.9309	2.72716678743902e-09	3.47721557303582e-07	11.797	WT_GMTP-WT_UT
ENSMUSG00000024732.7	Ccdc86	1.04866	5.18885	14.861	2.88218234269455e-09	3.65398492116725e-07	11.7901	WT_GMTP-WT_UT
ENSMUSG00000035673.10	Sbno2	0.888674	6.9428	14.766	3.10821375565143e-09	3.91828099038702e-07	11.6784	WT_GMTP-WT_UT
ENSMUSG00000022122.15	Ednrb	2.64384	1.23821	14.7498	3.1486145453751e-09	3.94691215454801e-07	11.5124	WT_GMTP-WT_UT
ENSMUSG00000032691.14	Nlrp3	1.02458	4.49198	14.7167	3.23282213774452e-09	4.0298301876812e-07	11.6943	WT_GMTP-WT_UT
ENSMUSG00000060519.11	Tor3a	0.91974	8.11802	14.7054	3.2622281742471e-09	4.04389429177642e-07	11.6158	WT_GMTP-WT_UT
ENSMUSG00000021025.8	Nfkbia	1.34035	5.73379	14.6644	3.3713193399629e-09	4.15603582500509e-07	11.6161	WT_GMTP-WT_UT
ENSMUSG00000037868.15	Egr2	-0.909085	5.48356	-14.6325	3.45857494166523e-09	4.24017487216353e-07	11.5958	WT_GMTP-WT_UT
ENSMUSG00000034118.15	Tpst1	0.951796	5.17751	14.556	3.67856144084428e-09	4.48207824996844e-07	11.5407	WT_GMTP-WT_UT
ENSMUSG00000032508.8	Myd88	0.749081	6.41393	14.5501	3.69606237616722e-09	4.48207824996844e-07	11.5081	WT_GMTP-WT_UT
ENSMUSG00000024772.9	Ehd1	1.08128	5.85943	14.4565	3.98710758894276e-09	4.79409342620563e-07	11.4409	WT_GMTP-WT_UT
ENSMUSG00000031355.16	Arhgap6	-0.884414	5.73806	-14.4537	3.99633118484402e-09	4.79409342620563e-07	11.4413	WT_GMTP-WT_UT
ENSMUSG00000030156.5	Cd69	2.65156	1.63276	14.4124	4.13291644127413e-09	4.93143125958019e-07	11.3531	WT_GMTP-WT_UT
ENSMUSG00000079197.10	Psme2	1.0713	7.49847	14.3597	4.31458035464156e-09	5.12081018367645e-07	11.3327	WT_GMTP-WT_UT
ENSMUSG00000049502.17	Dtx3l	0.998434	7.59243	14.3526	4.33949039335064e-09	5.12312429348322e-07	11.3257	WT_GMTP-WT_UT
ENSMUSG00000022180.7	Slc7a8	0.768597	6.55179	14.335	4.40238396340458e-09	5.17002070397087e-07	11.3253	WT_GMTP-WT_UT
ENSMUSG00000038437.11	Mllt6	0.641032	6.69513	14.3074	4.5032875866915e-09	5.2608301529763e-07	11.2995	WT_GMTP-WT_UT
ENSMUSG00000004040.16	Stat3	0.780453	7.37424	14.292	4.56045799367625e-09	5.29986975067178e-07	11.2768	WT_GMTP-WT_UT
ENSMUSG00000048285.9	Frmd6	-1.17816	4.53831	-14.263	4.67050139536272e-09	5.3996320017994e-07	11.3179	WT_GMTP-WT_UT
ENSMUSG00000025225.15	Nfkb2	0.976426	6.28371	14.1928	4.94871602439982e-09	5.69178869342439e-07	11.2095	WT_GMTP-WT_UT
ENSMUSG00000026896.14	Ifih1	1.17871	7.08722	14.1638	5.06856801203172e-09	5.79974143858788e-07	11.1714	WT_GMTP-WT_UT
ENSMUSG00000038213.7	Tapbpl	0.947414	5.67043	14.1384	5.17632442301749e-09	5.89282279850966e-07	11.1766	WT_GMTP-WT_UT
ENSMUSG00000094796.2	BC147527	1.45882	2.57945	14.1115	5.29313753067136e-09	5.99521714324214e-07	11.2238	WT_GMTP-WT_UT
ENSMUSG00000022529.11	Zfp263	0.642163	6.28608	14.1047	5.32324645024e-09	5.99886858809116e-07	11.1341	WT_GMTP-WT_UT
ENSMUSG00000073409.12	H2-Q6	1.50157	5.34687	14.0495	5.57338936576487e-09	6.24919783509103e-07	11.1093	WT_GMTP-WT_UT
ENSMUSG00000037921.15	Ddx60	1.49658	5.69234	14.0338	5.64669953161484e-09	6.26432173401303e-07	11.0865	WT_GMTP-WT_UT
ENSMUSG00000005800.3	Mmp8	-0.737611	6.28892	-14.0311	5.65937156621805e-09	6.26432173401303e-07	11.0708	WT_GMTP-WT_UT
ENSMUSG00000035208.16	Slfn8	1.11332	7.19577	14.0286	5.67110200452934e-09	6.26432173401303e-07	11.0536	WT_GMTP-WT_UT
ENSMUSG00000031805.17	Jak3	0.934385	5.00757	14.014	5.74093560414767e-09	6.31022148449985e-07	11.0896	WT_GMTP-WT_UT
ENSMUSG00000029605.16	Oas1b	1.29737	2.86877	14.0045	5.7863884458164e-09	6.32649604940075e-07	11.1457	WT_GMTP-WT_UT
ENSMUSG00000037907.16	Ankrd13b	-1.04014	4.59122	-13.9992	5.81244875241856e-09	6.32649604940075e-07	11.0923	WT_GMTP-WT_UT
ENSMUSG00000006800.14	Sulf2	-0.974517	6.31052	-13.9574	6.01929218992905e-09	6.51982847737315e-07	11.0067	WT_GMTP-WT_UT
ENSMUSG00000070323.11	Mmp27	-0.788352	4.31455	-13.9108	6.2593703306125e-09	6.74711740033607e-07	11.0283	WT_GMTP-WT_UT
ENSMUSG00000024589.18	Nedd4l	-0.71306	5.95111	-13.8721	6.46646966646702e-09	6.93684315710955e-07	10.9404	WT_GMTP-WT_UT
ENSMUSG00000024953.17	Prdx5	1.04076	8.21619	13.8655	6.50284997664307e-09	6.9424924176477e-07	10.9006	WT_GMTP-WT_UT
ENSMUSG00000037664.13	Cdkn1c	-1.46568	4.94259	-13.8438	6.62306952538244e-09	7.0371690628504e-07	10.9451	WT_GMTP-WT_UT
ENSMUSG00000005667.8	Mthfd2	1.01717	4.05316	13.8245	6.73195628230871e-09	7.11896400602626e-07	10.9659	WT_GMTP-WT_UT
ENSMUSG00000030577.14	Cd22	-0.704732	5.54945	-13.813	6.79761669760873e-09	7.15449157423319e-07	10.8991	WT_GMTP-WT_UT
ENSMUSG00000010358.13	Ifi35	1.1817	5.16499	13.784	6.96682783258093e-09	7.29816100602715e-07	10.8854	WT_GMTP-WT_UT
ENSMUSG00000019558.14	Slc6a8	-0.63241	7.86432	-13.7708	7.04493456301255e-09	7.34549649086444e-07	10.8207	WT_GMTP-WT_UT
ENSMUSG00000027078.14	Ube2l6	0.950363	6.90939	13.7633	7.09005450972727e-09	7.35815750118812e-07	10.8267	WT_GMTP-WT_UT
ENSMUSG00000020399.14	Havcr2	-1.19873	3.93911	-13.6815	7.60112188017137e-09	7.76350019465394e-07	10.8476	WT_GMTP-WT_UT
ENSMUSG00000039531.8	Zup1	0.745211	4.55952	13.6812	7.60326595105922e-09	7.76350019465394e-07	10.8188	WT_GMTP-WT_UT
ENSMUSG00000002944.15	Cd36	-0.857879	9.31438	-13.6796	7.61378303786845e-09	7.76350019465394e-07	10.7306	WT_GMTP-WT_UT
ENSMUSG00000027219.13	Slc28a2	0.834657	5.94409	13.6786	7.61980254842115e-09	7.76350019465394e-07	10.7711	WT_GMTP-WT_UT
ENSMUSG00000049723.14	Mmp12	-0.823605	10.1576	-13.6643	7.71361935073539e-09	7.8026423965841e-07	10.7157	WT_GMTP-WT_UT
ENSMUSG00000023991.16	Foxp4	1.07817	3.69467	13.6621	7.72815833659788e-09	7.8026423965841e-07	10.8415	WT_GMTP-WT_UT
ENSMUSG00000030717.9	Nupr1	1.57948	3.47706	13.6296	7.94616713853691e-09	7.98661384514298e-07	10.8219	WT_GMTP-WT_UT
ENSMUSG00000056144.14	Trim34a	0.818283	5.5076	13.5988	8.15850359459174e-09	8.16325967292043e-07	10.7121	WT_GMTP-WT_UT
ENSMUSG00000053040.13	Aph1c	-0.629433	7.36882	-13.5742	8.33299618038748e-09	8.30063141843687e-07	10.6524	WT_GMTP-WT_UT
ENSMUSG00000043336.14	Filip1l	0.899565	4.6702	13.5567	8.45872891101963e-09	8.38842747518138e-07	10.7048	WT_GMTP-WT_UT
ENSMUSG00000032596.14	Uba7	0.829823	7.0521	13.5314	8.64545042146091e-09	8.53566085194944e-07	10.6188	WT_GMTP-WT_UT
ENSMUSG00000024164.15	C3	1.15226	9.02234	13.5195	8.73459887945383e-09	8.58568743600235e-07	10.589	WT_GMTP-WT_UT
ENSMUSG00000032232.14	Cgnl1	-1.27357	3.42598	-13.5107	8.80058906070304e-09	8.59877912419142e-07	10.721	WT_GMTP-WT_UT
ENSMUSG00000040483.15	Xaf1	1.16036	5.59297	13.5075	8.82499179599262e-09	8.59877912419142e-07	10.6286	WT_GMTP-WT_UT
ENSMUSG00000041773.8	Enc1	-1.07766	5.69147	-13.4949	8.9220822203782e-09	8.65558350362168e-07	10.6145	WT_GMTP-WT_UT
ENSMUSG00000039013.16	Siglecf	-1.02044	3.18733	-13.4633	9.16910978790889e-09	8.85609426160776e-07	10.6871	WT_GMTP-WT_UT
ENSMUSG00000026389.16	Steap3	-0.710688	6.93611	-13.4584	9.20814712810022e-09	8.85609426160776e-07	10.5553	WT_GMTP-WT_UT
ENSMUSG00000039747.11	Orai2	0.725343	5.19264	13.4377	9.37418976186671e-09	8.96575769889731e-07	10.5788	WT_GMTP-WT_UT
ENSMUSG00000042726.14	Trafd1	0.777861	8.19629	13.4343	9.40253350756049e-09	8.96575769889731e-07	10.5178	WT_GMTP-WT_UT
ENSMUSG00000022636.13	Alcam	-0.637994	8.4365	-13.4147	9.56303182417236e-09	9.07999698267055e-07	10.4983	WT_GMTP-WT_UT
ENSMUSG00000044786.6	Zfp36	0.737517	6.60498	13.383	9.83053569668064e-09	9.2577744187027e-07	10.4933	WT_GMTP-WT_UT
ENSMUSG00000019122.8	Ccl9	0.982424	9.63056	13.3827	9.83324760109595e-09	9.2577744187027e-07	10.4638	WT_GMTP-WT_UT
ENSMUSG00000095609.2	Gm21188	0.753612	6.53536	13.3604	1.0025972838155e-08	9.39956016545179e-07	10.4742	WT_GMTP-WT_UT
ENSMUSG00000036948.17	Map11	0.911579	5.9899	13.3503	1.01150278128707e-08	9.44337303717928e-07	10.477	WT_GMTP-WT_UT
ENSMUSG00000031906.9	Smpd3	-1.66994	2.23679	-13.3333	1.02656084201153e-08	9.54402169491799e-07	10.5634	WT_GMTP-WT_UT
ENSMUSG00000022534.14	Mefv	1.26116	4.292	13.3046	1.05263059590617e-08	9.74578692384002e-07	10.4984	WT_GMTP-WT_UT
ENSMUSG00000002699.13	Lcp2	0.693419	5.90591	13.2855	1.07040900810335e-08	9.86943644537607e-07	10.4205	WT_GMTP-WT_UT
ENSMUSG00000030103.11	Bhlhe40	-0.941853	6.03653	-13.2709	1.08416602312951e-08	9.95514258192949e-07	10.4041	WT_GMTP-WT_UT
ENSMUSG00000002307.16	Daxx	0.795802	6.65473	13.1956	1.15837117754874e-08	1.05929246248546e-06	10.3222	WT_GMTP-WT_UT
ENSMUSG00000016496.7	Cd274	0.88962	7.3463	13.1636	1.19142610396216e-08	1.08260621786832e-06	10.2815	WT_GMTP-WT_UT
ENSMUSG00000039206.13	Daglb	-0.667876	7.94953	-13.1616	1.19356935237578e-08	1.08260621786832e-06	10.2722	WT_GMTP-WT_UT
ENSMUSG00000030966.13	Trim21	0.737402	5.75744	13.1435	1.21280661724257e-08	1.0956013785641e-06	10.2952	WT_GMTP-WT_UT
ENSMUSG00000018920.11	Cxcl16	0.685759	7.86663	13.0971	1.26373418070606e-08	1.13468362838999e-06	10.2136	WT_GMTP-WT_UT
ENSMUSG00000020057.2	Dram1	0.931689	6.65566	13.0948	1.26624041352175e-08	1.13468362838999e-06	10.2297	WT_GMTP-WT_UT
ENSMUSG00000033192.5	Lpcat2	0.920587	5.85089	13.0868	1.27531982327512e-08	1.13824844866951e-06	10.2406	WT_GMTP-WT_UT
ENSMUSG00000028266.17	Lmo4	0.917595	6.0075	13.0805	1.28245333103664e-08	1.13997957072698e-06	10.2308	WT_GMTP-WT_UT
ENSMUSG00000032254.10	Kif23	-0.964734	4.18924	-13.0761	1.28747748766728e-08	1.13997957072698e-06	10.2977	WT_GMTP-WT_UT
ENSMUSG00000022235.15	Cmbl	-1.30998	2.61099	-13.063	1.3024865239084e-08	1.14871074339795e-06	10.3433	WT_GMTP-WT_UT
ENSMUSG00000026628.13	Atf3	-0.559401	9.04504	-13.0422	1.32687598112114e-08	1.16216715525116e-06	10.1538	WT_GMTP-WT_UT
ENSMUSG00000091549.1	Gm6548	0.924694	4.85088	13.0372	1.33272729178944e-08	1.16216715525116e-06	10.2294	WT_GMTP-WT_UT
ENSMUSG00000017652.16	Cd40	1.88504	3.60714	13.0367	1.33336974743108e-08	1.16216715525116e-06	10.2934	WT_GMTP-WT_UT
ENSMUSG00000031304.18	Il2rg	0.672807	6.1832	12.9676	1.41820606224574e-08	1.23130085085172e-06	10.1222	WT_GMTP-WT_UT
ENSMUSG00000062585.11	Cnr2	-0.640823	5.79245	-12.9529	1.436930843264e-08	1.24272239944766e-06	10.1186	WT_GMTP-WT_UT
ENSMUSG00000028793.15	Rnf19b	0.828333	7.22416	12.9448	1.44736549035293e-08	1.24691375236467e-06	10.081	WT_GMTP-WT_UT
ENSMUSG00000029413.14	Naaa	0.845177	5.7996	12.9302	1.46642417121544e-08	1.25847394355115e-06	10.0974	WT_GMTP-WT_UT
ENSMUSG00000024014.8	Pim1	0.975711	6.26318	12.9041	1.50122142513896e-08	1.28340052333815e-06	10.0613	WT_GMTP-WT_UT
ENSMUSG00000066150.12	Slc31a1	0.622327	6.80356	12.8559	1.56773231563584e-08	1.33514546407566e-06	10.005	WT_GMTP-WT_UT
ENSMUSG00000021281.15	Tnfaip2	0.696143	8.68895	12.836	1.59610178952088e-08	1.35413761329199e-06	9.96329	WT_GMTP-WT_UT
ENSMUSG00000002885.14	Adgre5	-0.705896	6.57552	-12.8192	1.62054436302913e-08	1.36966690804049e-06	9.97505	WT_GMTP-WT_UT
ENSMUSG00000072769.6	Gm10419	-0.833606	3.03319	-12.8147	1.62716186553543e-08	1.37007029078083e-06	10.1173	WT_GMTP-WT_UT
ENSMUSG00000026821.16	Ralgds	1.48917	5.23627	12.8102	1.63381862097881e-08	1.37050356728948e-06	10.0036	WT_GMTP-WT_UT
ENSMUSG00000019082.18	Slc25a22	0.896624	5.05404	12.7903	1.66350458394857e-08	1.39017894313275e-06	9.99214	WT_GMTP-WT_UT
ENSMUSG00000028328.13	Tmod1	-1.41606	1.7973	-12.7532	1.72029201868887e-08	1.43227148555988e-06	10.036	WT_GMTP-WT_UT
ENSMUSG00000060147.15	Serpinb6a	-0.627933	8.71516	-12.7312	1.7550860119341e-08	1.4558079622411e-06	9.86414	WT_GMTP-WT_UT
ENSMUSG00000060703.12	Cd302	0.840274	6.27861	12.7171	1.77765976254045e-08	1.46907119561352e-06	9.88539	WT_GMTP-WT_UT
ENSMUSG00000008496.19	Pou2f2	0.751294	6.46908	12.708	1.79243263542896e-08	1.47581363078695e-06	9.87253	WT_GMTP-WT_UT
ENSMUSG00000038776.13	Ephx1	-0.720336	5.58939	-12.6959	1.81233784934451e-08	1.48671670707441e-06	9.88418	WT_GMTP-WT_UT
ENSMUSG00000038456.9	Dennd2a	-0.719495	5.06258	-12.6918	1.81914882931899e-08	1.48683764939907e-06	9.89936	WT_GMTP-WT_UT
ENSMUSG00000055322.16	Tns1	-0.973639	5.63405	-12.6781	1.84195396741582e-08	1.49998244069157e-06	9.86594	WT_GMTP-WT_UT
ENSMUSG00000003283.15	Hck	0.765454	7.47138	12.6666	1.86143868202464e-08	1.51033750225512e-06	9.81547	WT_GMTP-WT_UT
ENSMUSG00000021701.8	Plk2	-0.628602	8.03117	-12.6591	1.87417436842806e-08	1.51516132908461e-06	9.80147	WT_GMTP-WT_UT
ENSMUSG00000099757.1	BE692007	0.996023	4.41412	12.6341	1.91753301590924e-08	1.544617840577e-06	9.87645	WT_GMTP-WT_UT
ENSMUSG00000032035.16	Ets1	-1.35173	3.67773	-12.5847	2.00632277101251e-08	1.61032661833101e-06	9.87421	WT_GMTP-WT_UT
ENSMUSG00000022265.7	Ank	-0.721648	6.07001	-12.5773	2.02001532042919e-08	1.61550544246368e-06	9.75775	WT_GMTP-WT_UT
ENSMUSG00000025492.6	Ifitm3	0.885902	9.40022	12.5672	2.03877220112817e-08	1.62468300442046e-06	9.70456	WT_GMTP-WT_UT
ENSMUSG00000037826.5	Ppm1k	0.715613	3.68064	12.5135	2.14217103125724e-08	1.7010057729695e-06	9.80728	WT_GMTP-WT_UT
ENSMUSG00000021591.8	Glrx	0.646296	5.73424	12.4948	2.17956154193306e-08	1.72455874770044e-06	9.68829	WT_GMTP-WT_UT
ENSMUSG00000026358.13	Rgs1	-0.799957	6.04631	-12.4707	2.22855586868611e-08	1.75709424374534e-06	9.65631	WT_GMTP-WT_UT
ENSMUSG00000059013.12	Sh2d3c	-0.765214	5.52591	-12.4155	2.34570325048845e-08	1.84294636014609e-06	9.61877	WT_GMTP-WT_UT
ENSMUSG00000027639.16	Samhd1	0.587621	9.70209	12.4104	2.35685164895623e-08	1.84520809976001e-06	9.55246	WT_GMTP-WT_UT
ENSMUSG00000023150.14	Ivns1abp	-0.645988	6.36928	-12.37	2.44707587440859e-08	1.90914699250626e-06	9.55102	WT_GMTP-WT_UT
ENSMUSG00000056749.7	Nfil3	1.1766	3.40961	12.3629	2.46322941476649e-08	1.91505358646985e-06	9.68178	WT_GMTP-WT_UT
ENSMUSG00000006219.12	Fblim1	-0.643527	7.99122	-12.3429	2.50969917252112e-08	1.94440686237721e-06	9.49741	WT_GMTP-WT_UT
ENSMUSG00000017009.3	Sdc4	0.737424	6.54912	12.2887	2.64013383742599e-08	2.03838430153931e-06	9.46791	WT_GMTP-WT_UT
ENSMUSG00000040774.15	Cept1	0.642762	6.94601	12.2834	2.65333154505592e-08	2.04150988844251e-06	9.45472	WT_GMTP-WT_UT
ENSMUSG00000044827.10	Tlr1	0.693633	7.07632	12.2772	2.66885352135748e-08	2.04639617257902e-06	9.44632	WT_GMTP-WT_UT
ENSMUSG00000028278.14	Rragd	-0.664253	5.85785	-12.2591	2.7144515657134e-08	2.07423143101928e-06	9.45658	WT_GMTP-WT_UT
ENSMUSG00000048120.16	Entpd1	-0.646768	7.84957	-12.2348	2.77722766459531e-08	2.11495839181281e-06	9.39334	WT_GMTP-WT_UT
ENSMUSG00000110235.1	Gm5086	-1.66258	2.55961	-12.2309	2.78752764587317e-08	2.11558178103293e-06	9.59093	WT_GMTP-WT_UT
ENSMUSG00000070501.14	Ifi214	1.90412	0.75251	12.2058	2.85415772103343e-08	2.15880749930233e-06	9.41884	WT_GMTP-WT_UT
ENSMUSG00000015112.15	Slc25a13	-0.605584	5.14057	-12.1666	2.96165569877367e-08	2.23254809482219e-06	9.39154	WT_GMTP-WT_UT
ENSMUSG00000003382.18	Etv3	0.608145	7.64081	12.1424	3.03034959588665e-08	2.27246774471737e-06	9.30499	WT_GMTP-WT_UT
ENSMUSG00000054404.13	Slfn5	1.10849	9.39494	12.1408	3.03498134686405e-08	2.27246774471737e-06	9.28912	WT_GMTP-WT_UT
ENSMUSG00000037568.12	Vash2	-1.18323	2.62283	-12.1302	3.06540000797241e-08	2.28437227645397e-06	9.49543	WT_GMTP-WT_UT
ENSMUSG00000002983.17	Relb	1.06488	5.22293	12.1282	3.0713560836113e-08	2.28437227645397e-06	9.35032	WT_GMTP-WT_UT
ENSMUSG00000030852.18	Tacc2	-1.0841	3.29231	-12.1151	3.1097533120667e-08	2.30524669940679e-06	9.45235	WT_GMTP-WT_UT
ENSMUSG00000051439.7	Cd14	0.830853	7.96153	12.075	3.23034349151902e-08	2.38671040815443e-06	9.23426	WT_GMTP-WT_UT
ENSMUSG00000027605.18	Acss2	0.979866	3.19613	12.0434	3.32922427742615e-08	2.45164954792772e-06	9.38902	WT_GMTP-WT_UT
ENSMUSG00000020592.14	Sdc1	0.940753	7.31824	12.033	3.36226853002824e-08	2.46783874047764e-06	9.20135	WT_GMTP-WT_UT
ENSMUSG00000036875.15	Dna2	-0.628841	4.96529	-12.0281	3.37803773604378e-08	2.47128380342114e-06	9.26293	WT_GMTP-WT_UT
ENSMUSG00000078349.3	AW011738	1.41007	1.78198	12.0197	3.40516620029305e-08	2.48298932768428e-06	9.3792	WT_GMTP-WT_UT
ENSMUSG00000037816.10	Fbxw17	0.764769	5.40866	11.9991	3.47294794763235e-08	2.52416571842087e-06	9.21551	WT_GMTP-WT_UT
ENSMUSG00000074342.3	I830077J02Rik	0.872313	3.31636	11.9798	3.53770304649251e-08	2.56288208040219e-06	9.32004	WT_GMTP-WT_UT
ENSMUSG00000046718.8	Bst2	0.923006	8.55616	11.959	3.60906456567042e-08	2.60611837067327e-06	9.11271	WT_GMTP-WT_UT
ENSMUSG00000018339.11	Gpx3	-0.713098	5.14526	-11.9329	3.70067590772842e-08	2.66365101706917e-06	9.16026	WT_GMTP-WT_UT
ENSMUSG00000090231.10	Cfb	2.05692	1.89239	11.9281	3.71759714559756e-08	2.66722653085912e-06	9.29941	WT_GMTP-WT_UT
ENSMUSG00000025795.8	Rassf3	-0.538685	7.36028	-11.9209	3.74343713685659e-08	2.67715746265004e-06	9.08856	WT_GMTP-WT_UT
ENSMUSG00000039997.16	Ifi203	1.19648	7.51284	11.9069	3.79429195011331e-08	2.70485738922934e-06	9.07213	WT_GMTP-WT_UT
ENSMUSG00000037295.7	Ldlrap1	-0.534657	7.25008	-11.8971	3.83008861509665e-08	2.72168048626279e-06	9.06649	WT_GMTP-WT_UT
ENSMUSG00000041842.15	Fhdc1	-1.44328	1.57545	-11.8891	3.85984574574796e-08	2.73411867063093e-06	9.24554	WT_GMTP-WT_UT
ENSMUSG00000039699.14	Batf2	1.43048	3.3267	11.8649	3.95105107581694e-08	2.78238929434529e-06	9.20708	WT_GMTP-WT_UT
ENSMUSG00000021876.15	Rnase4	-0.935603	4.48259	-11.8644	3.95293060685455e-08	2.78238929434529e-06	9.12646	WT_GMTP-WT_UT
ENSMUSG00000051339.10	2900026A02Rik	-1.24969	2.72307	-11.8535	3.99492819350628e-08	2.80310794911024e-06	9.22815	WT_GMTP-WT_UT
ENSMUSG00000072596.4	Ear2	-1.47556	1.64453	-11.8501	4.00809346328827e-08	2.80352944972888e-06	9.21402	WT_GMTP-WT_UT
ENSMUSG00000031652.11	N4bp1	0.790692	6.38146	11.8018	4.1998318813566e-08	2.92846402402219e-06	8.9881	WT_GMTP-WT_UT
ENSMUSG00000054871.5	Tmem158	-1.10272	2.15529	-11.7591	4.37783481965532e-08	3.04307253367505e-06	9.14582	WT_GMTP-WT_UT
ENSMUSG00000102037.1	Bcl2a1a	1.89865	1.14967	11.752	4.4082699282253e-08	3.05471201579165e-06	9.07931	WT_GMTP-WT_UT
ENSMUSG00000031728.10	Zfp821	1.01041	3.49	11.746	4.43374245490402e-08	3.05761939541316e-06	9.07807	WT_GMTP-WT_UT
ENSMUSG00000066621.12	Tecpr1	-0.694075	8.20068	-11.7421	4.45090701933366e-08	3.05761939541316e-06	8.89673	WT_GMTP-WT_UT
ENSMUSG00000072844.6	G530011O06Rik	1.59658	1.53201	11.7415	4.45357550983407e-08	3.05761939541316e-06	9.10535	WT_GMTP-WT_UT
ENSMUSG00000037196.6	Pacrg	-1.5029	2.65051	-11.7218	4.53969897770939e-08	3.1071872174733e-06	9.10274	WT_GMTP-WT_UT
ENSMUSG00000034422.14	Parp14	1.21297	9.09133	11.7143	4.57321816638036e-08	3.11945760363874e-06	8.86166	WT_GMTP-WT_UT
ENSMUSG00000073242.4	Dnmt3aos	-0.934433	3.11605	-11.7115	4.58558729885496e-08	3.11945760363874e-06	9.0696	WT_GMTP-WT_UT
ENSMUSG00000071324.11	Armc2	-0.996974	3.19015	-11.7061	4.60971563206395e-08	3.12633996651194e-06	9.05954	WT_GMTP-WT_UT
ENSMUSG00000046768.13	Rhoj	-1.12548	3.6236	-11.6956	4.65724715163648e-08	3.14900471801408e-06	9.01802	WT_GMTP-WT_UT
ENSMUSG00000052821.3	Cysltr1	0.697224	4.80615	11.6911	4.67791515926823e-08	3.15301774788823e-06	8.93334	WT_GMTP-WT_UT
ENSMUSG00000071350.12	Setdb2	0.869233	3.99912	11.6882	4.69144396674089e-08	3.15301774788823e-06	8.98256	WT_GMTP-WT_UT
ENSMUSG00000051212.8	Gpr183	-1.14362	3.15989	-11.6735	4.75906522373906e-08	3.18885952964834e-06	9.02918	WT_GMTP-WT_UT
ENSMUSG00000037994.14	Slc9b2	-1.29414	1.7067	-11.6691	4.7798382622994e-08	3.19318955529002e-06	9.04767	WT_GMTP-WT_UT
ENSMUSG00000031383.8	Dusp9	-1.43025	2.09465	-11.6551	4.84559285254155e-08	3.22745412891819e-06	9.04548	WT_GMTP-WT_UT
ENSMUSG00000026228.6	Htr2b	-1.22199	2.7216	-11.6459	4.88988150117855e-08	3.24725970047015e-06	9.02559	WT_GMTP-WT_UT
ENSMUSG00000049037.8	Clec4a1	0.665472	7.37627	11.629	4.97163913875806e-08	3.29175620484001e-06	8.7919	WT_GMTP-WT_UT
ENSMUSG00000039232.12	Stx11	1.15888	3.47577	11.6219	5.00630849396876e-08	3.30157923050871e-06	8.95511	WT_GMTP-WT_UT
ENSMUSG00000031897.9	Psmb10	1.03407	7.39216	11.6199	5.01606847641488e-08	3.30157923050871e-06	8.78234	WT_GMTP-WT_UT
ENSMUSG00000050390.12	C77080	-0.644669	7.54612	-11.5827	5.20300757931029e-08	3.41455023873972e-06	8.7417	WT_GMTP-WT_UT
ENSMUSG00000044813.15	Shb	1.0625	2.91631	11.5538	5.3535245080399e-08	3.50302616855995e-06	8.92486	WT_GMTP-WT_UT
ENSMUSG00000021725.9	Parp8	0.72583	5.6366	11.5202	5.53450795515201e-08	3.61086187144172e-06	8.72244	WT_GMTP-WT_UT
ENSMUSG00000031584.16	Gsr	0.668955	5.84196	11.5148	5.56423363800331e-08	3.61234005443222e-06	8.70994	WT_GMTP-WT_UT
ENSMUSG00000025429.9	Pstpip2	0.758997	4.75108	11.5139	5.56915241663911e-08	3.61234005443222e-06	8.75555	WT_GMTP-WT_UT
ENSMUSG00000055782.9	Abcd2	-0.786961	5.54887	-11.4845	5.73415875558738e-08	3.70858795111366e-06	8.68876	WT_GMTP-WT_UT
ENSMUSG00000037337.11	Map4k1	-0.799298	5.01248	-11.4782	5.76971714579285e-08	3.71804500090038e-06	8.70513	WT_GMTP-WT_UT
ENSMUSG00000029780.14	Nt5c3	0.980068	5.70817	11.4761	5.78210736033896e-08	3.71804500090038e-06	8.67436	WT_GMTP-WT_UT
ENSMUSG00000032193.9	Ldlr	0.702104	6.59665	11.4654	5.84386343577482e-08	3.74695761041505e-06	8.63825	WT_GMTP-WT_UT
ENSMUSG00000053835.17	H2-T24	0.776993	7.12873	11.433	6.03547809599225e-08	3.85872844572708e-06	8.59352	WT_GMTP-WT_UT
ENSMUSG00000029189.10	Sel1l3	-0.661436	5.2737	-11.4079	6.18810570349549e-08	3.94500578748842e-06	8.62036	WT_GMTP-WT_UT
ENSMUSG00000028064.17	Sema4a	0.668611	5.54859	11.4036	6.21498682056157e-08	3.95085472727038e-06	8.6049	WT_GMTP-WT_UT
ENSMUSG00000038370.6	Pcp4l1	-0.727429	5.99776	-11.3893	6.30435246664279e-08	3.99627888034661e-06	8.5749	WT_GMTP-WT_UT
ENSMUSG00000018171.9	Vmp1	0.569181	6.74226	11.3695	6.4301440515178e-08	4.06447037454721e-06	8.53507	WT_GMTP-WT_UT
ENSMUSG00000063234.5	Gpr84	3.42262	-0.301866	11.35	6.55730930773297e-08	4.13314244586005e-06	8.40469	WT_GMTP-WT_UT
ENSMUSG00000102715.1	Gm6209	-1.90975	1.72814	-11.3408	6.61792312373957e-08	4.15959770873242e-06	8.73301	WT_GMTP-WT_UT
ENSMUSG00000022106.14	Rcbtb2	-0.667053	7.03943	-11.3368	6.64489285150499e-08	4.16481725268626e-06	8.49464	WT_GMTP-WT_UT
ENSMUSG00000030737.17	Slco2b1	-0.973078	3.92491	-11.3246	6.72628724280234e-08	4.20402373245514e-06	8.61709	WT_GMTP-WT_UT
ENSMUSG00000114608.1	Gm36161	0.784094	6.3935	11.3122	6.81077025669616e-08	4.24493622172239e-06	8.48326	WT_GMTP-WT_UT
ENSMUSG00000030649.18	Anapc15	-0.817729	3.42499	-11.3087	6.83453318603697e-08	4.24788130863629e-06	8.64099	WT_GMTP-WT_UT
ENSMUSG00000060568.14	Fam78b	-1.63067	1.98697	-11.3007	6.88991260013239e-08	4.27040610685428e-06	8.69869	WT_GMTP-WT_UT
ENSMUSG00000016528.10	Mapkapk2	0.731766	8.18594	11.2904	6.9619494834372e-08	4.30310190648017e-06	8.4288	WT_GMTP-WT_UT
ENSMUSG00000064120.14	Mocs1	0.63	5.89189	11.2842	7.0057228461662e-08	4.31819596316316e-06	8.46809	WT_GMTP-WT_UT
ENSMUSG00000054676.15	1600014C10Rik	0.828793	5.22452	11.281	7.02775497172139e-08	4.31984288385728e-06	8.49005	WT_GMTP-WT_UT
ENSMUSG00000020034.7	Tcp11l2	-0.671686	5.56398	-11.2742	7.07616386947237e-08	4.3376495719653e-06	8.4691	WT_GMTP-WT_UT
ENSMUSG00000037697.19	Ddhd1	0.723148	5.68757	11.2602	7.17707677044393e-08	4.38745517750453e-06	8.44976	WT_GMTP-WT_UT
ENSMUSG00000020312.12	Shc2	-1.32476	1.55689	-11.2439	7.2958853817533e-08	4.44789864817107e-06	8.63168	WT_GMTP-WT_UT
ENSMUSG00000115486.1	Gm49017	-6.37627	-5.01778	-11.2293	7.40479119820431e-08	4.50199198925157e-06	4.75479	WT_GMTP-WT_UT
ENSMUSG00000023206.16	Il15ra	1.42689	2.409	11.2215	7.46327307164912e-08	4.52521771868769e-06	8.614	WT_GMTP-WT_UT
ENSMUSG00000024789.13	Jak2	0.784676	6.02556	11.2084	7.56294357192192e-08	4.57322384607842e-06	8.3841	WT_GMTP-WT_UT
ENSMUSG00000015852.13	Fcrls	-0.890729	5.31916	-11.2027	7.60636261951236e-08	4.58239410539262e-06	8.40361	WT_GMTP-WT_UT
ENSMUSG00000037731.5	Themis2	0.565631	8.49771	11.1989	7.63608878416635e-08	4.58239410539262e-06	8.32897	WT_GMTP-WT_UT
ENSMUSG00000023809.10	Rps6ka2	-0.951472	5.37868	-11.1984	7.63971947835816e-08	4.58239410539262e-06	8.39652	WT_GMTP-WT_UT
ENSMUSG00000039936.18	Pik3cd	0.63307	7.8149	11.15	8.02473798207e-08	4.79340268115263e-06	8.28449	WT_GMTP-WT_UT
ENSMUSG00000020227.10	Irak3	0.590141	5.05089	11.1488	8.03447587841654e-08	4.79340268115263e-06	8.35896	WT_GMTP-WT_UT
ENSMUSG00000026893.4	Gca	1.0197	2.914	11.1324	8.17028105732835e-08	4.86142616619113e-06	8.49753	WT_GMTP-WT_UT
ENSMUSG00000096727.3	Psmb9	0.92078	6.18772	11.1269	8.21611778851478e-08	4.87429531138241e-06	8.29285	WT_GMTP-WT_UT
ENSMUSG00000019528.18	Gyg	-0.494579	8.24593	-11.1246	8.23559957151064e-08	4.87429531138241e-06	8.2522	WT_GMTP-WT_UT
ENSMUSG00000011008.13	Mcoln2	0.733974	5.92847	11.1188	8.28444744449196e-08	4.89023481028966e-06	8.29198	WT_GMTP-WT_UT
ENSMUSG00000045094.8	Arhgef37	1.254	1.9709	11.1134	8.32983679352914e-08	4.9040540468078e-06	8.51192	WT_GMTP-WT_UT
ENSMUSG00000002227.15	Mov10	0.776353	6.0197	11.099	8.45306181128683e-08	4.96350442619061e-06	8.2681	WT_GMTP-WT_UT
ENSMUSG00000074151.13	Nlrc5	1.09343	5.8877	11.0887	8.54238413140605e-08	5.00278785102528e-06	8.26126	WT_GMTP-WT_UT
ENSMUSG00000003882.5	Il7r	-0.657085	8.97201	-11.0823	8.59851031990583e-08	5.02247541277641e-06	8.20114	WT_GMTP-WT_UT
ENSMUSG00000025888.6	Casp1	0.605351	7.62705	11.0784	8.63337570821272e-08	5.02967394718931e-06	8.21061	WT_GMTP-WT_UT
ENSMUSG00000022885.16	St6gal1	-0.759188	6.20227	-11.046	8.92438408950861e-08	5.18567141117723e-06	8.20605	WT_GMTP-WT_UT
ENSMUSG00000009654.4	Oit3	-0.845462	3.61127	-11.0406	8.97397011912887e-08	5.19736833359213e-06	8.34636	WT_GMTP-WT_UT
ENSMUSG00000018930.3	Ccl4	0.999253	4.05653	11.0387	8.99110015133134e-08	5.19736833359213e-06	8.30725	WT_GMTP-WT_UT
ENSMUSG00000045903.9	Npas4	-1.4588	1.15911	-11.0272	9.09844244278263e-08	5.24582806785036e-06	8.39472	WT_GMTP-WT_UT
ENSMUSG00000032725.10	Folr2	-0.603041	6.08466	-11.019	9.17488754713076e-08	5.27626973812188e-06	8.18051	WT_GMTP-WT_UT
ENSMUSG00000050212.4	Eva1b	0.879456	3.49631	11.0071	9.2879719371284e-08	5.3255913124157e-06	8.32079	WT_GMTP-WT_UT
ENSMUSG00000062300.14	Nectin2	0.979536	3.80557	11.005	9.30838798835712e-08	5.3255913124157e-06	8.29221	WT_GMTP-WT_UT
ENSMUSG00000039031.16	Arhgap18	-0.576502	6.76568	-10.9543	9.80770510447785e-08	5.59180405236181e-06	8.09311	WT_GMTP-WT_UT
ENSMUSG00000021125.6	Arg2	2.15687	-0.368897	10.9527	9.82381207603563e-08	5.59180405236181e-06	8.03667	WT_GMTP-WT_UT
ENSMUSG00000034575.13	Tent4a	0.813445	5.14306	10.9466	9.88570810455097e-08	5.61111643978043e-06	8.13859	WT_GMTP-WT_UT
ENSMUSG00000101389.1	Ms4a4a	0.850248	6.48013	10.9444	9.90803512424815e-08	5.61111643978043e-06	8.08929	WT_GMTP-WT_UT
ENSMUSG00000008845.9	Cd163	-2.13102	0.655526	-10.9349	1.00053954649759e-07	5.65190858253182e-06	8.2504	WT_GMTP-WT_UT
ENSMUSG00000031712.10	Il15	0.680609	4.64346	10.9022	1.03499315808352e-07	5.83017399453693e-06	8.11865	WT_GMTP-WT_UT
ENSMUSG00000100658.1	F730311O21Rik	-1.34285	1.89354	-10.9001	1.03732311918216e-07	5.83017399453693e-06	8.29587	WT_GMTP-WT_UT
ENSMUSG00000079293.11	Clec7a	-0.555098	10.4974	-10.8976	1.04000393676448e-07	5.8305547339261e-06	7.99853	WT_GMTP-WT_UT
ENSMUSG00000049871.14	Nlrc3	-1.2208	3.25755	-10.8866	1.05187553017919e-07	5.87438964148186e-06	8.21401	WT_GMTP-WT_UT
ENSMUSG00000029063.16	Nadk	0.499759	8.45819	10.8855	1.05308826988426e-07	5.87438964148186e-06	7.99249	WT_GMTP-WT_UT
ENSMUSG00000030990.18	Pgap2	0.579336	5.90203	10.8674	1.07307322093087e-07	5.97094333631681e-06	8.0226	WT_GMTP-WT_UT
ENSMUSG00000050022.16	Amz1	-0.627501	6.28077	-10.8499	1.09277116957701e-07	6.05257728900013e-06	7.99212	WT_GMTP-WT_UT
ENSMUSG00000027452.11	Acss1	-0.612008	5.20611	-10.8482	1.09476344143308e-07	6.05257728900013e-06	8.02916	WT_GMTP-WT_UT
ENSMUSG00000000247.11	Lhx2	2.42129	-0.752776	10.8472	1.09588187368621e-07	6.05257728900013e-06	7.80941	WT_GMTP-WT_UT
ENSMUSG00000030329.11	Pianp	-0.654317	5.84232	-10.8287	1.11725966966908e-07	6.15541111341386e-06	7.98246	WT_GMTP-WT_UT
ENSMUSG00000001156.9	Mxd1	0.653231	4.96622	10.8192	1.12838688258918e-07	6.20140308157938e-06	8.00973	WT_GMTP-WT_UT
ENSMUSG00000002103.16	Acp2	0.495909	8.4589	10.7994	1.15190562978461e-07	6.31510327208451e-06	7.89845	WT_GMTP-WT_UT
ENSMUSG00000106734.3	Gm20559	0.668782	6.10559	10.7965	1.15544770497361e-07	6.3189962355579e-06	7.93887	WT_GMTP-WT_UT
ENSMUSG00000035459.18	Stab2	-1.2162	3.19921	-10.7909	1.16218795514399e-07	6.33930469803963e-06	8.11714	WT_GMTP-WT_UT
ENSMUSG00000030144.4	Clec4d	0.650172	7.93929	10.7887	1.164843331778e-07	6.33930469803963e-06	7.89247	WT_GMTP-WT_UT
ENSMUSG00000024339.12	Tap2	0.817504	6.11006	10.6735	1.31472852719373e-07	7.13760039593034e-06	7.8037	WT_GMTP-WT_UT
ENSMUSG00000024770.14	Lipn	-0.997407	3.20365	-10.6434	1.35712255924751e-07	7.34987273409946e-06	7.95823	WT_GMTP-WT_UT
ENSMUSG00000041633.14	Kctd12b	-0.985885	6.02384	-10.6346	1.36981086254318e-07	7.40062706438887e-06	7.7635	WT_GMTP-WT_UT
ENSMUSG00000022408.7	Fam83f	-0.711238	5.0365	-10.62	1.39119768857538e-07	7.49801788047885e-06	7.78783	WT_GMTP-WT_UT
ENSMUSG00000022010.19	Tsc22d1	-0.579316	6.04294	-10.5945	1.42932477988878e-07	7.68494549726708e-06	7.7184	WT_GMTP-WT_UT
ENSMUSG00000024600.8	Slc27a6	-0.913287	3.21824	-10.589	1.43757083817257e-07	7.71070146926552e-06	7.89799	WT_GMTP-WT_UT
ENSMUSG00000010406.12	Mrpl52	0.905373	4.06815	10.5836	1.44596888385027e-07	7.737147171547e-06	7.81473	WT_GMTP-WT_UT
ENSMUSG00000041736.7	Tspo	0.803392	7.3121	10.5805	1.45072730124216e-07	7.74403786426228e-06	7.67212	WT_GMTP-WT_UT
ENSMUSG00000022216.17	Psme1	0.617451	7.7429	10.5639	1.47643505444017e-07	7.86245712881232e-06	7.64664	WT_GMTP-WT_UT
ENSMUSG00000022661.14	Cd200	-0.830219	4.53041	-10.5394	1.51554074428485e-07	8.05149062553046e-06	7.72973	WT_GMTP-WT_UT
ENSMUSG00000027951.16	Adar	0.697562	7.02563	10.5344	1.52360270966455e-07	8.0750943612221e-06	7.62629	WT_GMTP-WT_UT
ENSMUSG00000106825.1	2510016D11Rik	-0.900495	3.71527	-10.5304	1.53017148173843e-07	8.08330528811276e-06	7.78752	WT_GMTP-WT_UT
ENSMUSG00000049097.9	Ankrd34a	-1.54104	0.791016	-10.529	1.532397318546e-07	8.08330528811276e-06	7.86769	WT_GMTP-WT_UT
ENSMUSG00000039501.14	Znfx1	0.896681	9.3815	10.5204	1.54647802546969e-07	8.13422421455474e-06	7.58346	WT_GMTP-WT_UT
ENSMUSG00000034116.17	Vav1	0.482399	8.19218	10.5187	1.54934132173431e-07	8.13422421455474e-06	7.59029	WT_GMTP-WT_UT
ENSMUSG00000068747.14	Sort1	-0.665667	6.6457	-10.4839	1.60816328993483e-07	8.4232271099333e-06	7.57826	WT_GMTP-WT_UT
ENSMUSG00000027961.7	Lrrc39	-2.04681	0.964389	-10.4654	1.64018359893334e-07	8.57082356978911e-06	7.81837	WT_GMTP-WT_UT
ENSMUSG00000063611.5	Gm10134	1.53199	2.17348	10.4536	1.66106708154833e-07	8.6596705118196e-06	7.82345	WT_GMTP-WT_UT
ENSMUSG00000036887.5	C1qa	0.599343	9.25579	10.4422	1.68153428484898e-07	8.7459381113835e-06	7.49611	WT_GMTP-WT_UT
ENSMUSG00000036853.5	Mcoln3	-0.634385	6.29856	-10.4345	1.69555226770051e-07	8.79833901144219e-06	7.53197	WT_GMTP-WT_UT
ENSMUSG00000020658.10	Efr3b	-1.10943	5.44268	-10.4149	1.73172079417125e-07	8.96517078430232e-06	7.53993	WT_GMTP-WT_UT
ENSMUSG00000011148.14	Adssl1	-0.693034	5.97552	-10.4068	1.74688559178629e-07	9.0187646591124e-06	7.51072	WT_GMTP-WT_UT
ENSMUSG00000034312.15	Iqsec1	-0.592091	7.29934	-10.405	1.75015690287979e-07	9.0187646591124e-06	7.47564	WT_GMTP-WT_UT
ENSMUSG00000029217.16	Tec	-0.437128	6.46328	-10.4012	1.75741614440039e-07	9.03530562903364e-06	7.48994	WT_GMTP-WT_UT
ENSMUSG00000020010.7	Vnn3	1.15735	2.13969	10.3769	1.80402336951491e-07	9.25360309057154e-06	7.7423	WT_GMTP-WT_UT
ENSMUSG00000026475.7	Rgs16	-1.70518	0.0945276	-10.3664	1.82471127623677e-07	9.3279719174937e-06	7.60638	WT_GMTP-WT_UT
ENSMUSG00000040855.15	Reps2	-1.1147	6.00783	-10.3653	1.82688286108759e-07	9.3279719174937e-06	7.4628	WT_GMTP-WT_UT
ENSMUSG00000026946.9	Nmi	0.837657	5.27095	10.337	1.88365157001849e-07	9.59587157119235e-06	7.45985	WT_GMTP-WT_UT
ENSMUSG00000029490.4	Mfsd7a	1.03001	4.28212	10.3342	1.88922067547822e-07	9.60231911889422e-06	7.51956	WT_GMTP-WT_UT
ENSMUSG00000027956.11	Tmem144	-0.710165	4.18158	-10.327	1.90413926669918e-07	9.65614987678609e-06	7.51966	WT_GMTP-WT_UT
ENSMUSG00000070031.11	Sp140	0.500451	6.13108	10.2985	1.96389093694464e-07	9.93657561815096e-06	7.38313	WT_GMTP-WT_UT
ENSMUSG00000031613.9	Hpgd	-0.8847	4.67581	-10.264	2.03891271524392e-07	1.02928188722257e-05	7.41102	WT_GMTP-WT_UT
ENSMUSG00000021822.3	Plau	-0.844224	6.60252	-10.2579	2.05257983986706e-07	1.0338423017371e-05	7.32369	WT_GMTP-WT_UT
ENSMUSG00000037331.15	Larp1	0.51429	7.30683	10.2453	2.08095620801913e-07	1.04577423129574e-05	7.29394	WT_GMTP-WT_UT
ENSMUSG00000004698.11	Hdac9	-1.03943	2.93616	-10.2391	2.09505170218263e-07	1.05049187934384e-05	7.53849	WT_GMTP-WT_UT
ENSMUSG00000024335.20	Brd2	0.434837	8.20102	10.2153	2.15016757437271e-07	1.07571051764525e-05	7.24627	WT_GMTP-WT_UT
ENSMUSG00000056220.14	Pla2g4a	0.683815	4.35733	10.1764	2.2436331195611e-07	1.11877908484047e-05	7.3347	WT_GMTP-WT_UT
ENSMUSG00000019823.17	Mical1	-0.7067	6.41345	-10.1754	2.24628257073693e-07	1.11877908484047e-05	7.23419	WT_GMTP-WT_UT
ENSMUSG00000046186.8	Cd109	-0.914364	3.21716	-10.17	2.25951141534305e-07	1.12286143007905e-05	7.43471	WT_GMTP-WT_UT
ENSMUSG00000034353.14	Ramp1	-1.02887	3.09258	-10.138	2.34031011651241e-07	1.16042976954981e-05	7.41083	WT_GMTP-WT_UT
ENSMUSG00000001128.7	Cfp	0.726361	7.64386	10.13	2.36095776368627e-07	1.16777898659766e-05	7.15563	WT_GMTP-WT_UT
ENSMUSG00000030402.5	Ppm1n	3.49167	-1.41895	10.1283	2.36559898687825e-07	1.16777898659766e-05	6.9044	WT_GMTP-WT_UT
ENSMUSG00000042719.17	Naa25	0.640887	5.21113	10.1172	2.39457983018664e-07	1.17811975754858e-05	7.21203	WT_GMTP-WT_UT
ENSMUSG00000033880.11	Lgals3bp	0.540683	10.4366	10.1162	2.39710648468183e-07	1.17811975754858e-05	7.12189	WT_GMTP-WT_UT
ENSMUSG00000049401.10	Ogfr	0.705642	6.99421	10.1034	2.43125987707277e-07	1.19227915685988e-05	7.13698	WT_GMTP-WT_UT
ENSMUSG00000030662.10	Ipo5	-0.524375	8.13316	-10.0943	2.45573308912475e-07	1.20163974600089e-05	7.10755	WT_GMTP-WT_UT
ENSMUSG00000066026.14	Dhrs3	-0.555128	8.55747	-10.0697	2.52330134968342e-07	1.23200050362114e-05	7.07461	WT_GMTP-WT_UT
ENSMUSG00000055447.19	Cd47	0.438074	8.58892	10.0241	2.6540704133631e-07	1.2930190640474e-05	7.02126	WT_GMTP-WT_UT
ENSMUSG00000029821.15	Gsdme	-0.584862	4.24838	-10.0199	2.66645464370524e-07	1.29622227592582e-05	7.16429	WT_GMTP-WT_UT
ENSMUSG00000024601.9	Isoc1	0.553744	6.53543	10.0028	2.71761213066538e-07	1.31821911894645e-05	7.03121	WT_GMTP-WT_UT
ENSMUSG00000025044.16	Msr1	0.588943	8.38554	9.99305	2.74731923883032e-07	1.32973826846032e-05	6.98692	WT_GMTP-WT_UT
ENSMUSG00000031565.18	Fgfr1	-1.17013	3.01393	-9.99016	2.75616511055717e-07	1.33113229679355e-05	7.25098	WT_GMTP-WT_UT
ENSMUSG00000037580.10	Gch1	0.951481	5.04695	9.98759	2.76408094650324e-07	1.33207209847358e-05	7.07082	WT_GMTP-WT_UT
ENSMUSG00000060591.9	Ifitm2	0.868668	6.06433	9.98055	2.78582267204539e-07	1.33965649313251e-05	7.01911	WT_GMTP-WT_UT
ENSMUSG00000031429.14	Psmd10	0.628073	5.44056	9.96433	2.83662321971014e-07	1.36115212691166e-05	7.02409	WT_GMTP-WT_UT
ENSMUSG00000055994.15	Nod2	1.02629	2.51163	9.95433	2.86844062839423e-07	1.37346600303349e-05	7.25435	WT_GMTP-WT_UT
ENSMUSG00000024778.13	Fas	1.42298	2.61232	9.94403	2.90159563035052e-07	1.38618000389343e-05	7.23469	WT_GMTP-WT_UT
ENSMUSG00000024338.15	Psmb8	0.796532	7.0266	9.94147	2.90990238221962e-07	1.38618000389343e-05	6.94777	WT_GMTP-WT_UT
ENSMUSG00000032501.9	Trib1	0.491315	4.46095	9.94033	2.9136307167392e-07	1.38618000389343e-05	7.05473	WT_GMTP-WT_UT
ENSMUSG00000049988.5	Lrrc25	0.569964	7.61152	9.92429	2.9663278987496e-07	1.40824839159148e-05	6.91654	WT_GMTP-WT_UT
ENSMUSG00000070730.11	Rmdn3	0.574205	4.57531	9.92213	2.97350665356512e-07	1.40865931976642e-05	7.02473	WT_GMTP-WT_UT
ENSMUSG00000031729.6	Ist1	0.474453	6.60432	9.91447	2.99910431245199e-07	1.4177757314352e-05	6.92608	WT_GMTP-WT_UT
ENSMUSG00000034858.16	Fam214a	-0.964145	5.12829	-9.90706	3.02409785060001e-07	1.42656861184858e-05	6.97252	WT_GMTP-WT_UT
ENSMUSG00000027347.18	Rasgrp1	2.86277	0.399137	9.89387	3.06913338984766e-07	1.44475893096352e-05	7.17374	WT_GMTP-WT_UT
ENSMUSG00000032377.8	Plscr4	-0.857404	4.19772	-9.88916	3.08539330605393e-07	1.44935538606277e-05	7.01689	WT_GMTP-WT_UT
ENSMUSG00000024397.14	Aif1	0.533481	7.03152	9.88374	3.10420379281486e-07	1.45512813506467e-05	6.87984	WT_GMTP-WT_UT
ENSMUSG00000031996.17	Aplp2	-0.486671	9.78446	-9.87587	3.13174283348601e-07	1.46495970321957e-05	6.84115	WT_GMTP-WT_UT
ENSMUSG00000015340.10	Cybb	0.660196	11.4773	9.84928	3.22677220192633e-07	1.50376088394931e-05	6.81299	WT_GMTP-WT_UT
ENSMUSG00000033720.12	Sfxn5	0.938865	3.70868	9.84889	3.22816951289257e-07	1.50376088394931e-05	7.01664	WT_GMTP-WT_UT
ENSMUSG00000068417.8	Pnp2	1.42523	1.86577	9.84317	3.24905324256103e-07	1.51033593752634e-05	7.16575	WT_GMTP-WT_UT
ENSMUSG00000049103.14	Ccr2	-0.958259	3.61951	-9.83468	3.28027052334886e-07	1.52167725961503e-05	7.00936	WT_GMTP-WT_UT
ENSMUSG00000022048.8	Dpysl2	0.806762	6.2134	9.82436	3.31864628434465e-07	1.53628536395398e-05	6.83099	WT_GMTP-WT_UT
ENSMUSG00000028121.8	Bcar3	-0.661988	4.41951	-9.8177	3.34366875918703e-07	1.54466420339007e-05	6.91455	WT_GMTP-WT_UT
ENSMUSG00000020572.8	Nampt	0.561958	8.25327	9.79974	3.41211948594258e-07	1.57302938202142e-05	6.76067	WT_GMTP-WT_UT
ENSMUSG00000062980.15	Cped1	-1.41232	1.96271	-9.79488	3.43092890805165e-07	1.57843952011044e-05	7.10753	WT_GMTP-WT_UT
ENSMUSG00000026875.14	Traf1	1.16071	3.66306	9.78971	3.45102212506323e-07	1.58441680404395e-05	6.95227	WT_GMTP-WT_UT
ENSMUSG00000035004.3	Igsf6	0.436814	8.47056	9.78128	3.48411965231018e-07	1.59632775774121e-05	6.73644	WT_GMTP-WT_UT
ENSMUSG00000030605.15	Mfge8	-0.59376	10.5705	-9.74874	3.6149619610142e-07	1.65288209500225e-05	6.69034	WT_GMTP-WT_UT
ENSMUSG00000027423.15	Snx5	-0.423846	9.54278	-9.73935	3.65366000535188e-07	1.66715983025391e-05	6.67973	WT_GMTP-WT_UT
ENSMUSG00000020593.16	Lpin1	-0.646347	5.66169	-9.71913	3.73857409324541e-07	1.69945079313818e-05	6.72567	WT_GMTP-WT_UT
ENSMUSG00000031129.9	Slc9a9	-0.750874	5.46898	-9.71888	3.73966001627235e-07	1.69945079313818e-05	6.7336	WT_GMTP-WT_UT
ENSMUSG00000027580.17	Helz2	1.16789	7.33188	9.70488	3.799707127619e-07	1.72322896623095e-05	6.66153	WT_GMTP-WT_UT
ENSMUSG00000023019.12	Gpd1	-1.24629	1.76854	-9.67887	3.91400502415008e-07	1.77146438344545e-05	6.98382	WT_GMTP-WT_UT
ENSMUSG00000023067.14	Cdkn1a	0.580399	7.0307	9.64221	4.08141000122049e-07	1.84349193030836e-05	6.59259	WT_GMTP-WT_UT
ENSMUSG00000017057.9	Il13ra1	0.830318	4.44934	9.63265	4.1263547137258e-07	1.85992944398803e-05	6.69301	WT_GMTP-WT_UT
ENSMUSG00000006418.17	Rnf114	0.535615	7.65865	9.63093	4.13447319597572e-07	1.85992944398803e-05	6.56706	WT_GMTP-WT_UT
ENSMUSG00000026829.9	Gbgt1	1.54786	2.03553	9.61292	4.22068662533632e-07	1.89489297125009e-05	6.89649	WT_GMTP-WT_UT
ENSMUSG00000021596.16	Mctp1	-0.757496	5.56772	-9.60836	4.24283001455453e-07	1.90100935973404e-05	6.59716	WT_GMTP-WT_UT
ENSMUSG00000074677.11	Sirpb1c	-0.505155	5.58084	-9.59507	4.30807676724985e-07	1.92637508832958e-05	6.5806	WT_GMTP-WT_UT
ENSMUSG00000024401.14	Tnf	1.42126	3.55851	9.5912	4.32727147113124e-07	1.93108816670703e-05	6.72935	WT_GMTP-WT_UT
ENSMUSG00000022270.16	Retreg1	-0.494789	6.71653	-9.58002	4.38322519332166e-07	1.95215376723725e-05	6.52505	WT_GMTP-WT_UT
ENSMUSG00000047098.18	Rnf31	0.592994	6.02215	9.56828	4.44286940734082e-07	1.97477579852581e-05	6.53136	WT_GMTP-WT_UT
ENSMUSG00000104068.1	Gm37199	-1.64275	0.181343	-9.56104	4.48005319208837e-07	1.98734447067729e-05	6.79519	WT_GMTP-WT_UT
ENSMUSG00000058427.10	Cxcl2	2.49291	0.527109	9.54416	4.56804959168433e-07	2.02235893927088e-05	6.81165	WT_GMTP-WT_UT
ENSMUSG00000028327.14	Stra6l	-0.621188	5.66403	-9.53127	4.63654455898468e-07	2.04861819296287e-05	6.50007	WT_GMTP-WT_UT
ENSMUSG00000039678.12	Tbc1d13	0.447499	7.66028	9.52359	4.67783981990229e-07	2.05875155443586e-05	6.43731	WT_GMTP-WT_UT
ENSMUSG00000030342.8	Cd9	-0.637159	8.26797	-9.52357	4.67793231792669e-07	2.05875155443586e-05	6.42892	WT_GMTP-WT_UT
ENSMUSG00000063506.14	Arhgap22	-0.60616	4.43697	-9.5151	4.72393612217726e-07	2.07490524988467e-05	6.55298	WT_GMTP-WT_UT
ENSMUSG00000032915.6	Adgre4	1.40354	2.39648	9.48799	4.8745305665531e-07	2.13684480415519e-05	6.72622	WT_GMTP-WT_UT
ENSMUSG00000026807.8	Ak8	-0.866181	3.33769	-9.46062	5.03178241679131e-07	2.20145413854636e-05	6.59806	WT_GMTP-WT_UT
ENSMUSG00000021990.16	Spata13	0.484761	4.79956	9.4335	5.19294244501017e-07	2.26751711889456e-05	6.42692	WT_GMTP-WT_UT
ENSMUSG00000079017.3	Ifi27l2a	0.501665	6.50302	9.42978	5.2155215743068e-07	2.27292837670913e-05	6.34824	WT_GMTP-WT_UT
ENSMUSG00000022494.15	Shisa9	-1.33267	2.16549	-9.42697	5.23259092724352e-07	2.27592205379307e-05	6.67214	WT_GMTP-WT_UT
ENSMUSG00000001588.12	Acap1	-1.3181	0.927839	-9.41939	5.27900776924023e-07	2.29164397577933e-05	6.69389	WT_GMTP-WT_UT
ENSMUSG00000026814.16	Eng	0.560067	6.56787	9.37428	5.56446627936583e-07	2.41087254546582e-05	6.27848	WT_GMTP-WT_UT
ENSMUSG00000087477.1	Gm13822	2.359	-1.67849	9.36281	5.63965556716074e-07	2.43871385019491e-05	6.09914	WT_GMTP-WT_UT
ENSMUSG00000035547.14	Capn5	-0.444351	5.59008	-9.34857	5.73452689207171e-07	2.47494194473494e-05	6.28055	WT_GMTP-WT_UT
ENSMUSG00000026031.15	Cflar	0.75707	7.08138	9.34426	5.76353011603352e-07	2.48265728724046e-05	6.22907	WT_GMTP-WT_UT
ENSMUSG00000040229.11	Gpr34	-1.70043	0.944663	-9.33511	5.82570563731384e-07	2.50460442939082e-05	6.59884	WT_GMTP-WT_UT
ENSMUSG00000042129.8	Rassf4	0.605708	9.2989	9.30978	6.00164017257185e-07	2.57528071481915e-05	6.1588	WT_GMTP-WT_UT
ENSMUSG00000004933.17	Matk	-0.822508	5.56186	-9.30313	6.04880084933542e-07	2.58851905010611e-05	6.22589	WT_GMTP-WT_UT
ENSMUSG00000060675.13	Plaat3	0.910922	4.01705	9.30216	6.05569373977228e-07	2.58851905010611e-05	6.33262	WT_GMTP-WT_UT
ENSMUSG00000023959.10	Clic5	1.68631	2.43685	9.2958	6.10123489467306e-07	2.60299912437553e-05	6.49496	WT_GMTP-WT_UT
ENSMUSG00000042608.15	Stk40	0.56513	4.67549	9.29386	6.11513793590938e-07	2.60395177030431e-05	6.26501	WT_GMTP-WT_UT
ENSMUSG00000020393.16	Kremen1	0.502564	5.0953	9.27231	6.27240890157494e-07	2.66583352039698e-05	6.21129	WT_GMTP-WT_UT
ENSMUSG00000029098.17	Acox3	-0.468428	7.37045	-9.26037	6.36140102710229e-07	2.69851599083143e-05	6.11943	WT_GMTP-WT_UT
ENSMUSG00000042476.12	Abcb4	-0.705788	4.26666	-9.24488	6.4789110654905e-07	2.74314881602067e-05	6.23832	WT_GMTP-WT_UT
ENSMUSG00000034226.7	Rhov	-0.725013	5.19018	-9.23661	6.54258166476887e-07	2.7637378417054e-05	6.16177	WT_GMTP-WT_UT
ENSMUSG00000030830.18	Itgal	0.656342	7.72256	9.23536	6.55231173872701e-07	2.7637378417054e-05	6.08217	WT_GMTP-WT_UT
ENSMUSG00000044162.12	Tnip3	0.527329	5.61527	9.23033	6.59142138323929e-07	2.77498840234374e-05	6.13347	WT_GMTP-WT_UT
ENSMUSG00000023008.18	Fmnl3	-0.481483	5.86834	-9.20851	6.76399543119581e-07	2.84227928542885e-05	6.09611	WT_GMTP-WT_UT
ENSMUSG00000008318.10	Relt	1.47478	1.6143	9.20495	6.79258980980463e-07	2.84892963207088e-05	6.44109	WT_GMTP-WT_UT
ENSMUSG00000061232.16	H2-K1	0.630355	11.7034	9.19721	6.8552559796246e-07	2.86981851169538e-05	6.022	WT_GMTP-WT_UT
ENSMUSG00000029474.7	Rnf34	0.460062	5.87959	9.18026	6.99466367534318e-07	2.92269532936203e-05	6.06051	WT_GMTP-WT_UT
ENSMUSG00000032554.15	Trf	-0.504262	8.83401	-9.17497	7.03879884632104e-07	2.93563960108339e-05	5.99397	WT_GMTP-WT_UT
ENSMUSG00000034157.12	Cipc	-0.459902	7.22166	-9.16497	7.12303017635992e-07	2.96522709561789e-05	6.00357	WT_GMTP-WT_UT
ENSMUSG00000034612.7	Chst11	-0.670697	4.51216	-9.15824	7.18029799788966e-07	2.98350073048253e-05	6.10985	WT_GMTP-WT_UT
ENSMUSG00000045868.12	Gvin1	1.23577	4.5568	9.15113	7.24138421583351e-07	3.00329007449615e-05	6.09733	WT_GMTP-WT_UT
ENSMUSG00000028480.14	Glipr2	1.14385	1.51455	9.13133	7.4143415047687e-07	3.06900583673652e-05	6.35774	WT_GMTP-WT_UT
ENSMUSG00000042901.10	Aida	0.47963	6.58489	9.12987	7.42734348513299e-07	3.06900583673652e-05	5.97484	WT_GMTP-WT_UT
ENSMUSG00000038387.9	Rras	0.660661	5.52594	9.11959	7.51906640015715e-07	3.10116319014245e-05	5.99945	WT_GMTP-WT_UT
ENSMUSG00000030157.5	Clec2d	0.543268	6.41603	9.11492	7.56111132535746e-07	3.11275049820482e-05	5.96091	WT_GMTP-WT_UT
ENSMUSG00000020806.15	Rhbdf2	0.55833	5.9008	9.10389	7.66152003231313e-07	3.14827801990797e-05	5.96418	WT_GMTP-WT_UT
ENSMUSG00000033174.17	Mgll	-0.717553	5.84446	-9.0942	7.75082120274934e-07	3.17874962646355e-05	5.95419	WT_GMTP-WT_UT
ENSMUSG00000025969.15	Nrp2	0.639631	9.09049	9.09276	7.7641668373712e-07	3.17874962646355e-05	5.88905	WT_GMTP-WT_UT
ENSMUSG00000042351.9	Grap2	-1.34404	2.24641	-9.08434	7.84286362799515e-07	3.20508820753582e-05	6.25677	WT_GMTP-WT_UT
ENSMUSG00000004113.18	Cacna1b	-1.05619	2.08828	-9.08214	7.86362717867122e-07	3.20769859666711e-05	6.2668	WT_GMTP-WT_UT
ENSMUSG00000027342.14	Pcna	-0.429839	8.39855	-9.0791	7.89225943949898e-07	3.208308205769e-05	5.87755	WT_GMTP-WT_UT
ENSMUSG00000038886.10	Man2a2	-0.683493	7.2045	-9.07893	7.89387892693578e-07	3.208308205769e-05	5.89594	WT_GMTP-WT_UT
ENSMUSG00000033857.12	Engase	-0.611931	5.58078	-9.07477	7.933386109436e-07	3.21850262290628e-05	5.94075	WT_GMTP-WT_UT
ENSMUSG00000026687.14	Aldh9a1	-0.475709	6.56576	-9.06794	7.99862769415624e-07	3.23908130199108e-05	5.89753	WT_GMTP-WT_UT
ENSMUSG00000026627.7	Pacc1	-0.392061	6.61946	-9.06535	8.023515852181e-07	3.2432737175673e-05	5.89282	WT_GMTP-WT_UT
ENSMUSG00000058818.13	Pirb	0.379831	9.14727	9.05899	8.08500553073231e-07	3.26221932020307e-05	5.84612	WT_GMTP-WT_UT
ENSMUSG00000036103.9	Colec12	-0.611204	5.23662	-9.05455	8.1282694596601e-07	3.27375589266057e-05	5.93195	WT_GMTP-WT_UT
ENSMUSG00000003123.15	Lipe	0.561625	4.64974	9.04759	8.19647649088032e-07	3.29527891785608e-05	5.96079	WT_GMTP-WT_UT
ENSMUSG00000040751.12	Lat2	-0.59915	7.27204	-9.03769	8.29462883650239e-07	3.32874196454816e-05	5.84252	WT_GMTP-WT_UT
ENSMUSG00000055184.4	Fam72a	1.60046	1.48325	9.03537	8.31775781334252e-07	3.33203106084581e-05	6.24471	WT_GMTP-WT_UT
ENSMUSG00000061578.8	Ksr2	-1.25575	4.34346	-9.01663	8.5075586354189e-07	3.40195619770792e-05	5.94709	WT_GMTP-WT_UT
ENSMUSG00000044309.8	Apol7c	2.42761	0.434988	8.98687	8.81859409660554e-07	3.52002307831054e-05	6.18013	WT_GMTP-WT_UT
ENSMUSG00000025154.15	Arhgap19	-0.445724	7.81703	-8.98384	8.85095213494034e-07	3.52663026762364e-05	5.7645	WT_GMTP-WT_UT
ENSMUSG00000070738.10	Dgkd	-0.447356	7.16983	-8.9783	8.91038786266234e-07	3.54398367878048e-05	5.76937	WT_GMTP-WT_UT
ENSMUSG00000079363.7	Gbp4	1.60423	2.50866	8.97517	8.94417351800943e-07	3.55109152504172e-05	6.09868	WT_GMTP-WT_UT
ENSMUSG00000030847.8	Bag3	-0.419375	5.90696	-8.95955	9.11478729877738e-07	3.61240229125435e-05	5.78172	WT_GMTP-WT_UT
ENSMUSG00000053318.7	Slamf8	0.702109	7.00633	8.95784	9.1337004101574e-07	3.61347973850784e-05	5.74697	WT_GMTP-WT_UT
ENSMUSG00000027540.13	Ptpn1	0.405894	8.37906	8.95391	9.17724959224274e-07	3.62428265755243e-05	5.7191	WT_GMTP-WT_UT
ENSMUSG00000026466.16	Tor1aip1	0.425587	7.68649	8.92471	9.50796942393e-07	3.74825656812986e-05	5.69132	WT_GMTP-WT_UT
ENSMUSG00000020689.4	Itgb3	-0.891766	3.87082	-8.91784	9.58771813333752e-07	3.77302918358307e-05	5.86981	WT_GMTP-WT_UT
ENSMUSG00000029084.5	Cd38	1.22179	1.21308	8.90551	9.73244942699243e-07	3.82324197296623e-05	6.097	WT_GMTP-WT_UT
ENSMUSG00000056153.15	Socs6	-0.498635	6.51571	-8.8985	9.81586006598241e-07	3.84923173378323e-05	5.68391	WT_GMTP-WT_UT
ENSMUSG00000041957.15	Pkp2	-1.27766	1.87966	-8.89334	9.8776211545764e-07	3.86185141707841e-05	6.05204	WT_GMTP-WT_UT
ENSMUSG00000026112.7	Coa5	0.460203	7.5361	8.89292	9.88265656411854e-07	3.86185141707841e-05	5.65329	WT_GMTP-WT_UT
ENSMUSG00000006360.11	Crip1	-0.543605	7.00436	-8.88741	9.94923380953211e-07	3.87941969335272e-05	5.65714	WT_GMTP-WT_UT
ENSMUSG00000078153.3	Psme2b	0.707421	5.15951	8.88633	9.96238732707887e-07	3.87941969335272e-05	5.72315	WT_GMTP-WT_UT
ENSMUSG00000086109.2	Gm13391	-1.30019	1.2564	-8.88415	9.98885320806575e-07	3.88294915734444e-05	6.07036	WT_GMTP-WT_UT
ENSMUSG00000028885.8	Smpdl3b	1.14838	2.86724	8.87717	1.00741786200148e-06	3.90930691388506e-05	5.93744	WT_GMTP-WT_UT
ENSMUSG00000074607.11	Tox2	-1.82925	1.04547	-8.87421	1.01106435598597e-06	3.91647763463283e-05	6.06192	WT_GMTP-WT_UT
ENSMUSG00000043008.9	Klhl6	-0.447599	5.01757	-8.87282	1.01277622694534e-06	3.91647763463283e-05	5.7142	WT_GMTP-WT_UT
ENSMUSG00000026796.16	Fam129b	-0.482538	9.5418	-8.86305	1.0249133440958e-06	3.95655561363486e-05	5.59481	WT_GMTP-WT_UT
ENSMUSG00000021038.17	Vipas39	-0.385377	7.56805	-8.85396	1.0363598673829e-06	3.99383380326679e-05	5.60274	WT_GMTP-WT_UT
ENSMUSG00000066595.9	Flvcr1	-0.497079	6.71513	-8.85148	1.03949595387443e-06	3.99901262393107e-05	5.61822	WT_GMTP-WT_UT
ENSMUSG00000057143.15	Trim12c	0.715345	6.27159	8.83984	1.05439110897858e-06	4.044349692502e-05	5.61616	WT_GMTP-WT_UT
ENSMUSG00000035900.18	Gramd4	-0.701211	3.87073	-8.83945	1.05490589388974e-06	4.044349692502e-05	5.7704	WT_GMTP-WT_UT
ENSMUSG00000026360.9	Rgs2	-0.393043	7.93735	-8.83518	1.06042085988639e-06	4.05851983647428e-05	5.57267	WT_GMTP-WT_UT
ENSMUSG00000055013.16	Agap1	-0.620824	6.70523	-8.82976	1.06747741313819e-06	4.07853142454664e-05	5.59058	WT_GMTP-WT_UT
ENSMUSG00000035246.16	Pcyt1b	-1.16168	0.816195	-8.82572	1.07276826847139e-06	4.09173989306019e-05	6.0039	WT_GMTP-WT_UT
ENSMUSG00000058163.14	Gm5431	0.777914	7.08341	8.82189	1.07781458602161e-06	4.10397216005124e-05	5.57126	WT_GMTP-WT_UT
ENSMUSG00000017400.10	Stac2	-0.552631	5.65853	-8.81449	1.08763581375905e-06	4.13431310262448e-05	5.6064	WT_GMTP-WT_UT
ENSMUSG00000107429.2	Gm44206	-0.917417	1.4164	-8.80894	1.09506336553868e-06	4.1554674957933e-05	5.97414	WT_GMTP-WT_UT
ENSMUSG00000033949.12	Trim36	-0.521995	4.54391	-8.80675	1.09800031323431e-06	4.15707714944992e-05	5.66344	WT_GMTP-WT_UT
ENSMUSG00000018217.12	Pmp22	-0.434926	8.22149	-8.80585	1.09921369523392e-06	4.15707714944992e-05	5.53108	WT_GMTP-WT_UT
ENSMUSG00000053581.13	Zfand2a	-0.400421	7.398	-8.79853	1.10913544519602e-06	4.18750240078831e-05	5.53454	WT_GMTP-WT_UT
ENSMUSG00000035356.17	Nfkbiz	0.769624	4.78728	8.78041	1.13408912294257e-06	4.27448152030703e-05	5.6109	WT_GMTP-WT_UT
ENSMUSG00000025932.14	Eya1	-0.661422	4.15376	-8.76686	1.15314347474117e-06	4.32963108470884e-05	5.64777	WT_GMTP-WT_UT
ENSMUSG00000027399.1	Il1a	2.35892	0.928862	8.76616	1.15413523870471e-06	4.32963108470884e-05	5.93301	WT_GMTP-WT_UT
ENSMUSG00000054051.7	Ercc6	-0.797063	5.00882	-8.76588	1.15454241715671e-06	4.32963108470884e-05	5.57755	WT_GMTP-WT_UT
ENSMUSG00000006411.12	Nectin4	0.498883	5.02544	8.75887	1.16455039000607e-06	4.35983437117542e-05	5.56748	WT_GMTP-WT_UT
ENSMUSG00000040111.17	Gramd1b	-0.56983	6.40244	-8.7369	1.19650683113743e-06	4.47196933386425e-05	5.47932	WT_GMTP-WT_UT
ENSMUSG00000035352.3	Ccl12	3.50711	-1.19978	8.73529	1.19888613532328e-06	4.47336895275389e-05	5.63941	WT_GMTP-WT_UT
ENSMUSG00000024079.4	Eif2ak2	0.883692	6.76141	8.71672	1.22669051076249e-06	4.56947335002396e-05	5.44301	WT_GMTP-WT_UT
ENSMUSG00000022637.11	Cblb	-0.578354	7.26074	-8.71298	1.23238031876826e-06	4.58301700877936e-05	5.42656	WT_GMTP-WT_UT
ENSMUSG00000045664.5	Cdc42ep2	1.50761	2.08677	8.68962	1.26852480480525e-06	4.70958302323119e-05	5.78343	WT_GMTP-WT_UT
ENSMUSG00000079685.10	Ulbp1	-0.629158	4.89743	-8.67729	1.28805959218707e-06	4.77276980055938e-05	5.47022	WT_GMTP-WT_UT
ENSMUSG00000025203.6	Scd2	0.63099	6.36167	8.67618	1.28982216185063e-06	4.77276980055938e-05	5.40166	WT_GMTP-WT_UT
ENSMUSG00000024451.9	Arap3	-0.56618	6.03911	-8.67149	1.29734339298176e-06	4.79265283569571e-05	5.40636	WT_GMTP-WT_UT
ENSMUSG00000032265.14	Tent5a	0.548673	7.16863	8.66585	1.30646516120637e-06	4.81837308132195e-05	5.36712	WT_GMTP-WT_UT
ENSMUSG00000023030.16	Slc11a2	0.433647	6.85844	8.6487	1.33459589934626e-06	4.91399971982064e-05	5.35197	WT_GMTP-WT_UT
ENSMUSG00000025076.11	Casp7	0.626468	4.73766	8.64627	1.33863250760063e-06	4.92074252752767e-05	5.44107	WT_GMTP-WT_UT
ENSMUSG00000037370.13	Enpp1	-0.505853	4.61824	-8.62648	1.37199468973393e-06	5.03508511711074e-05	5.42453	WT_GMTP-WT_UT
ENSMUSG00000020577.17	Tspan13	-0.721039	4.55865	-8.61754	1.38735400435611e-06	5.0830919374709e-05	5.41766	WT_GMTP-WT_UT
ENSMUSG00000063193.9	Cd300lb	-0.401741	8.3542	-8.61126	1.39826080136765e-06	5.1146546329371e-05	5.27638	WT_GMTP-WT_UT
ENSMUSG00000022295.8	Atp6v1c1	-0.415882	8.33035	-8.58506	1.44474520507694e-06	5.2760392407335e-05	5.24224	WT_GMTP-WT_UT
ENSMUSG00000097415.2	AU020206	-0.445305	6.4678	-8.57734	1.45875799702221e-06	5.31850771038505e-05	5.26916	WT_GMTP-WT_UT
ENSMUSG00000001270.9	Ckb	-0.531001	8.4282	-8.56285	1.48545853498295e-06	5.40702060213287e-05	5.21191	WT_GMTP-WT_UT
ENSMUSG00000110388.1	Gm30329	-1.06342	2.76858	-8.55733	1.49576401181984e-06	5.43566488529903e-05	5.5431	WT_GMTP-WT_UT
ENSMUSG00000068246.6	Apol9b	1.53745	0.992464	8.55057	1.50848629065463e-06	5.47298448835394e-05	5.66992	WT_GMTP-WT_UT
ENSMUSG00000072812.4	Ahnak2	-0.656222	6.87141	-8.54538	1.51832141732443e-06	5.49972496505846e-05	5.21609	WT_GMTP-WT_UT
ENSMUSG00000020264.5	Slc36a2	-1.87175	0.714335	-8.53855	1.53140102233551e-06	5.53521802651849e-05	5.65696	WT_GMTP-WT_UT
ENSMUSG00000021298.8	Gpr132	0.621271	4.24423	8.53767	1.53308149526663e-06	5.53521802651849e-05	5.34183	WT_GMTP-WT_UT
ENSMUSG00000029762.6	Akr1b8	-0.582949	4.14969	-8.52142	1.56468059782854e-06	5.64018064286723e-05	5.3298	WT_GMTP-WT_UT
ENSMUSG00000041695.2	Kcnj2	-0.721958	7.29093	-8.51932	1.56882290783149e-06	5.64599121652322e-05	5.17214	WT_GMTP-WT_UT
ENSMUSG00000015980.14	Lrrc27	-0.517096	4.69932	-8.50254	1.6022869710501e-06	5.75713835507907e-05	5.25592	WT_GMTP-WT_UT
ENSMUSG00000022353.10	Mtss1	-0.521324	7.70146	-8.49588	1.61576663145741e-06	5.79623807840985e-05	5.1334	WT_GMTP-WT_UT
ENSMUSG00000037126.16	Psd	1.20954	2.17597	8.47281	1.66345394065735e-06	5.95772837526283e-05	5.50015	WT_GMTP-WT_UT
ENSMUSG00000020707.6	Rnf135	0.490848	4.46626	8.4674	1.67485719450946e-06	5.98895650337974e-05	5.2288	WT_GMTP-WT_UT
ENSMUSG00000025586.17	Cpeb1	-0.714334	2.86948	-8.46394	1.6821879415753e-06	6.00554552645915e-05	5.40987	WT_GMTP-WT_UT
ENSMUSG00000034652.12	Cd300a	-0.399401	8.40847	-8.43498	1.7449236135988e-06	6.21956558949361e-05	5.04274	WT_GMTP-WT_UT
ENSMUSG00000000693.10	Loxl3	-0.593368	4.6974	-8.42889	1.75842673633207e-06	6.257699484494e-05	5.15875	WT_GMTP-WT_UT
ENSMUSG00000026748.13	Plxdc2	-0.709011	5.24816	-8.39444	1.83696521123743e-06	6.52043912479149e-05	5.07678	WT_GMTP-WT_UT
ENSMUSG00000039813.14	Tbc1d2	-0.700351	4.80368	-8.39395	1.83810164903592e-06	6.52043912479149e-05	5.10422	WT_GMTP-WT_UT
ENSMUSG00000002325.15	Irf9	0.35925	6.67566	8.39111	1.84475589432669e-06	6.53365686827165e-05	5.01653	WT_GMTP-WT_UT
ENSMUSG00000025959.13	Klf7	0.568253	3.86448	8.38701	1.85438756098799e-06	6.55736127548731e-05	5.18384	WT_GMTP-WT_UT
ENSMUSG00000026207.16	Speg	-0.458282	6.78603	-8.3831	1.86363401180747e-06	6.5796306495981e-05	5.00285	WT_GMTP-WT_UT
ENSMUSG00000034165.16	Ccnd3	0.63252	5.08951	8.36589	1.90488969993202e-06	6.71466095964979e-05	5.04809	WT_GMTP-WT_UT
ENSMUSG00000102895.1	5830415G21Rik	-1.56145	0.726791	-8.36358	1.91052035950145e-06	6.72388655860504e-05	5.44148	WT_GMTP-WT_UT
ENSMUSG00000026509.15	Capn2	-0.388986	7.02912	-8.35948	1.92050698476969e-06	6.74838934664033e-05	4.96524	WT_GMTP-WT_UT
ENSMUSG00000040710.10	St8sia4	-0.781138	7.02214	-8.3501	1.94361058516703e-06	6.818833802961e-05	4.95283	WT_GMTP-WT_UT
ENSMUSG00000029379.10	Cxcl3	7.29667	-3.67627	8.34611	1.95353871710245e-06	6.8429057134548e-05	4.05813	WT_GMTP-WT_UT
ENSMUSG00000034006.17	Slc66a2	-0.53249	6.36493	-8.30931	2.0475926841763e-06	7.1611184266498e-05	4.91606	WT_GMTP-WT_UT
ENSMUSG00000017417.14	Plxdc1	-0.439421	5.94361	-8.29839	2.07640358874142e-06	7.25051537959112e-05	4.91611	WT_GMTP-WT_UT
ENSMUSG00000027555.8	Car13	0.500538	5.32033	8.29701	2.08008565058672e-06	7.25202361274084e-05	4.94263	WT_GMTP-WT_UT
ENSMUSG00000052459.13	Atp6v1a	-0.388235	10.1279	-8.29385	2.08851556095334e-06	7.27005424517192e-05	4.8446	WT_GMTP-WT_UT
ENSMUSG00000024640.9	Psat1	-0.555606	3.44807	-8.29236	2.09251441918916e-06	7.2726283855713e-05	5.10916	WT_GMTP-WT_UT
ENSMUSG00000035852.11	Misp	1.38791	1.03239	8.28949	2.10023762486427e-06	7.2881185262203e-05	5.34292	WT_GMTP-WT_UT
ENSMUSG00000023307.14	Marchf5	0.449098	6.5689	8.2809	2.12347946043255e-06	7.35732875786202e-05	4.87165	WT_GMTP-WT_UT
ENSMUSG00000001552.14	Jup	-0.738829	4.35363	-8.27481	2.14014662952545e-06	7.40358011544207e-05	4.98264	WT_GMTP-WT_UT
ENSMUSG00000026355.11	Mcm6	-0.417913	5.84876	-8.27123	2.15001229603789e-06	7.4261957215934e-05	4.88325	WT_GMTP-WT_UT
ENSMUSG00000018167.10	Stard3	0.537309	6.99208	8.26911	2.15588014385699e-06	7.43495419627219e-05	4.84455	WT_GMTP-WT_UT
ENSMUSG00000021575.16	Ahrr	0.573048	5.39933	8.26718	2.16121289347891e-06	7.44184310064736e-05	4.8983	WT_GMTP-WT_UT
ENSMUSG00000035891.16	Cerk	-0.368152	8.69158	-8.25663	2.19073076016654e-06	7.53186062428291e-05	4.8005	WT_GMTP-WT_UT
ENSMUSG00000097534.3	Gm16675	0.923348	1.9172	8.24883	2.21278965192482e-06	7.59599623129209e-05	5.23514	WT_GMTP-WT_UT
ENSMUSG00000039616.10	Mocos	-0.396474	7.08945	-8.24283	2.22995803791439e-06	7.64317261136463e-05	4.80678	WT_GMTP-WT_UT
ENSMUSG00000037344.14	Slc12a9	0.604223	5.94125	8.23717	2.24625125040817e-06	7.68720922551494e-05	4.83364	WT_GMTP-WT_UT
ENSMUSG00000070348.5	Ccnd1	-0.741638	4.92799	-8.23526	2.25178418781126e-06	7.69434312138326e-05	4.8831	WT_GMTP-WT_UT
ENSMUSG00000045312.12	Lhfpl2	-0.464807	8.84449	-8.23224	2.26057419692135e-06	7.70816910443304e-05	4.7662	WT_GMTP-WT_UT
ENSMUSG00000030088.15	Aldh1l1	0.602903	4.45457	8.2315	2.26273955245984e-06	7.70816910443304e-05	4.91527	WT_GMTP-WT_UT
ENSMUSG00000074622.4	Mafb	0.380306	8.95247	8.21885	2.29992781688314e-06	7.82290996617585e-05	4.74722	WT_GMTP-WT_UT
ENSMUSG00000001930.17	Vwf	-0.567406	7.10083	-8.20974	2.32711060328064e-06	7.90332098797577e-05	4.76168	WT_GMTP-WT_UT
ENSMUSG00000039156.19	Stim2	0.388184	5.21402	8.19372	2.37577381513339e-06	8.05632844028439e-05	4.80903	WT_GMTP-WT_UT
ENSMUSG00000002108.10	Nr1h3	0.506128	6.77841	8.18605	2.39945776682258e-06	8.12429456010806e-05	4.73741	WT_GMTP-WT_UT
ENSMUSG00000045216.7	Hs6st1	-0.538825	5.99837	-8.17835	2.42347542879449e-06	8.19318291555929e-05	4.75173	WT_GMTP-WT_UT
ENSMUSG00000038893.12	Fam117a	-0.72044	3.72252	-8.173	2.44032425884621e-06	8.23766341719144e-05	4.91465	WT_GMTP-WT_UT
ENSMUSG00000050565.16	Tor1aip2	0.462397	7.61602	8.17173	2.44433713752687e-06	8.23874540024729e-05	4.69944	WT_GMTP-WT_UT
ENSMUSG00000024817.13	Uhrf2	-0.390748	7.00492	-8.1672	2.45873931154414e-06	8.27478887759945e-05	4.70605	WT_GMTP-WT_UT
ENSMUSG00000031443.7	F7	-0.559949	5.56052	-8.16518	2.465165152342e-06	8.28392018738059e-05	4.75238	WT_GMTP-WT_UT
ENSMUSG00000032965.11	Ift57	0.797404	3.85996	8.15534	2.49682685814667e-06	8.37769890012432e-05	4.87446	WT_GMTP-WT_UT
ENSMUSG00000029650.10	Slc46a3	-0.463341	6.61228	-8.15243	2.50625359430649e-06	8.39193792379415e-05	4.69625	WT_GMTP-WT_UT
ENSMUSG00000020654.15	Adcy3	-0.724162	4.56036	-8.15169	2.50867057998453e-06	8.39193792379415e-05	4.79789	WT_GMTP-WT_UT
ENSMUSG00000034248.7	Slc25a37	0.600707	4.6903	8.15056	2.51235357553645e-06	8.39193792379415e-05	4.78583	WT_GMTP-WT_UT
ENSMUSG00000025279.7	Dnase1l3	0.871545	1.46981	8.1473	2.52299078187154e-06	8.41487194557542e-05	5.13844	WT_GMTP-WT_UT
ENSMUSG00000007613.15	Tgfbr1	-0.647276	8.16983	-8.12416	2.60000970367548e-06	8.65880843553895e-05	4.62598	WT_GMTP-WT_UT
ENSMUSG00000002870.8	Mcm2	-0.43581	4.34731	-8.12263	2.60516914095568e-06	8.66058647610593e-05	4.77772	WT_GMTP-WT_UT
ENSMUSG00000038712.16	Mindy1	-0.4547	6.5626	-8.12171	2.60830641865423e-06	8.66058647610593e-05	4.65571	WT_GMTP-WT_UT
ENSMUSG00000054510.5	Gm14461	-0.620367	4.25872	-8.11529	2.63018827593707e-06	8.7202661219887e-05	4.77661	WT_GMTP-WT_UT
ENSMUSG00000019947.10	Arid5b	0.577661	5.6044	8.11234	2.64029597512869e-06	8.74078992478435e-05	4.67826	WT_GMTP-WT_UT
ENSMUSG00000040140.15	Tdrd6	3.71018	-4.88216	8.10623	2.66139054244965e-06	8.79757143313765e-05	3.17302	WT_GMTP-WT_UT
ENSMUSG00000038633.5	Degs1	-0.432957	8.12595	-8.09338	2.70632849408867e-06	8.92874574391527e-05	4.58439	WT_GMTP-WT_UT
ENSMUSG00000020415.16	Pttg1	0.552793	4.18756	8.0926	2.70907581617471e-06	8.92874574391527e-05	4.75292	WT_GMTP-WT_UT
ENSMUSG00000017715.11	Pgs1	0.580943	5.17666	8.0914	2.71333229286411e-06	8.92958457974586e-05	4.67195	WT_GMTP-WT_UT
ENSMUSG00000026437.11	Cdk18	-0.41691	8.3845	-8.08648	2.73079212561617e-06	8.97380923400201e-05	4.57174	WT_GMTP-WT_UT
ENSMUSG00000059401.14	Mamld1	-0.662887	3.32653	-8.07787	2.76166481363849e-06	9.06191573334052e-05	4.8375	WT_GMTP-WT_UT
ENSMUSG00000017466.9	Timp2	-0.418641	8.87208	-8.07603	2.76832826453316e-06	9.07044178656804e-05	4.55274	WT_GMTP-WT_UT
ENSMUSG00000021143.10	Pacs2	-0.465875	7.42791	-8.07487	2.77251119118447e-06	9.07082730335763e-05	4.57049	WT_GMTP-WT_UT
ENSMUSG00000015961.8	Adss	-0.354163	6.58225	-8.07312	2.77885135006985e-06	9.07825917629702e-05	4.58859	WT_GMTP-WT_UT
ENSMUSG00000055612.15	Cdca7	-0.908792	1.79	-8.06543	2.80692914613215e-06	9.15658041486061e-05	5.00597	WT_GMTP-WT_UT
ENSMUSG00000039285.12	Azi2	0.519392	6.31552	8.06345	2.8142085513689e-06	9.16692487688966e-05	4.5835	WT_GMTP-WT_UT
ENSMUSG00000038843.18	Gcnt1	-0.538136	6.40062	-8.05822	2.83349016764649e-06	9.21627785870204e-05	4.57364	WT_GMTP-WT_UT
ENSMUSG00000035513.19	Ntng2	0.964307	1.61619	8.05589	2.84214280474669e-06	9.23096541518382e-05	5.00805	WT_GMTP-WT_UT
ENSMUSG00000081778.1	Gm6325	-1.24028	1.13677	-8.04994	2.86438242054232e-06	9.27627130902144e-05	5.03132	WT_GMTP-WT_UT
ENSMUSG00000035517.17	Tdrd7	0.428507	6.54046	8.04993	2.86440681751256e-06	9.27627130902144e-05	4.55793	WT_GMTP-WT_UT
ENSMUSG00000034926.3	Dhcr24	0.496706	4.84725	8.04741	2.87388334239985e-06	9.29033394785777e-05	4.63311	WT_GMTP-WT_UT
ENSMUSG00000010051.15	Hyal1	-0.753598	2.90604	-8.04656	2.87707648365066e-06	9.29033394785777e-05	4.85203	WT_GMTP-WT_UT
ENSMUSG00000050002.14	Idnk	0.493232	4.6799	8.04361	2.88821479585993e-06	9.31282322832696e-05	4.64071	WT_GMTP-WT_UT
ENSMUSG00000000982.5	Ccl3	0.575073	5.67832	8.04022	2.90104595759983e-06	9.34069818931098e-05	4.57599	WT_GMTP-WT_UT
ENSMUSG00000033781.7	Asb13	0.539379	4.58483	8.03843	2.90787539089686e-06	9.34919648372933e-05	4.64128	WT_GMTP-WT_UT
ENSMUSG00000035121.6	Neil2	-0.791952	1.99581	-8.02778	2.94876771985516e-06	9.46702937167314e-05	4.93647	WT_GMTP-WT_UT
ENSMUSG00000040133.2	Gpr176	-0.75876	3.695	-8.0264	2.95409089869399e-06	9.47049284806882e-05	4.71918	WT_GMTP-WT_UT
ENSMUSG00000038332.13	Sesn1	-0.481991	7.67607	-8.02149	2.97320617647095e-06	9.51809891185026e-05	4.49237	WT_GMTP-WT_UT
ENSMUSG00000027366.12	Sppl2a	0.498413	8.52875	8.01954	2.98082192970846e-06	9.52880798246202e-05	4.47799	WT_GMTP-WT_UT
ENSMUSG00000028832.11	Stmn1	-0.623456	5.51822	-8.01689	2.99119578913991e-06	9.54454575915292e-05	4.55143	WT_GMTP-WT_UT
ENSMUSG00000019302.16	Atp6v0a1	-0.39993	8.87779	-8.0161	2.99430019782505e-06	9.54454575915292e-05	4.47012	WT_GMTP-WT_UT
ENSMUSG00000053338.9	Tarm1	3.1742	-1.90938	8.0137	3.00372640481262e-06	9.56093399009758e-05	4.65344	WT_GMTP-WT_UT
ENSMUSG00000041707.8	Tmem273	-0.756507	4.97517	-8.01208	3.01015258469277e-06	9.56773997467945e-05	4.57571	WT_GMTP-WT_UT
ENSMUSG00000040061.17	Plcb2	-0.460395	5.77091	-8.00821	3.02549354343892e-06	9.60282182571161e-05	4.52792	WT_GMTP-WT_UT
ENSMUSG00000045294.11	Insig1	0.413778	5.91427	8.00498	3.0383448564409e-06	9.62991317922809e-05	4.5175	WT_GMTP-WT_UT
ENSMUSG00000037553.14	Zdhhc18	0.48565	5.42511	7.99479	3.07932790355647e-06	9.74596361873126e-05	4.52555	WT_GMTP-WT_UT
ENSMUSG00000046207.14	Pik3r6	0.498858	4.77051	7.99059	3.09638944491007e-06	9.7860818249686e-05	4.56058	WT_GMTP-WT_UT
ENSMUSG00000020476.14	Dbnl	0.553771	7.25066	7.98594	3.11538472738624e-06	9.83218945150907e-05	4.45159	WT_GMTP-WT_UT
ENSMUSG00000031444.16	F10	0.71383	6.80719	7.97016	3.18083102744481e-06	0.000100246	4.44035	WT_GMTP-WT_UT
ENSMUSG00000026797.16	Stxbp1	0.596253	5.36549	7.96245	3.21333671654549e-06	0.000101127	4.48403	WT_GMTP-WT_UT
ENSMUSG00000057191.13	AB124611	0.425846	7.29397	7.95795	3.23247933739734e-06	0.000101586	4.41187	WT_GMTP-WT_UT
ENSMUSG00000038894.7	Irs2	-0.68961	4.29078	-7.94824	3.27416882831539e-06	0.000102752	4.54445	WT_GMTP-WT_UT
ENSMUSG00000029185.14	Fam114a1	0.497253	4.41075	7.91994	3.39899039767544e-06	0.000106519	4.49369	WT_GMTP-WT_UT
ENSMUSG00000038910.7	Plcl2	0.36874	6.23801	7.91762	3.40947400185268e-06	0.00010652	4.38455	WT_GMTP-WT_UT
ENSMUSG00000038388.14	Mpp6	-0.419639	5.85148	-7.9175	3.41001553209844e-06	0.00010652	4.39886	WT_GMTP-WT_UT
ENSMUSG00000058056.16	Palld	-0.707043	3.48053	-7.91676	3.413337136652e-06	0.00010652	4.59661	WT_GMTP-WT_UT
ENSMUSG00000039652.16	Cpeb3	-0.563553	4.16868	-7.91509	3.42091604695853e-06	0.000106607	4.51114	WT_GMTP-WT_UT
ENSMUSG00000062232.14	Rapgef2	0.708545	5.5004	7.91339	3.4286247652961e-06	0.000106699	4.40907	WT_GMTP-WT_UT
ENSMUSG00000022175.9	Lrp10	0.428764	7.2479	7.91099	3.43955694039984e-06	0.000106797	4.34756	WT_GMTP-WT_UT
ENSMUSG00000006585.3	Cdt1	-0.497701	5.38886	-7.91059	3.44134891076809e-06	0.000106797	4.41085	WT_GMTP-WT_UT
ENSMUSG00000031971.15	Ccsap	-0.522663	3.85789	-7.90608	3.46201506801707e-06	0.000107289	4.53405	WT_GMTP-WT_UT
ENSMUSG00000046223.10	Plaur	-0.679337	5.32243	-7.90334	3.47458913356749e-06	0.000107529	4.40437	WT_GMTP-WT_UT
ENSMUSG00000003308.15	Keap1	0.530023	6.23712	7.90182	3.48160428337243e-06	0.000107597	4.36259	WT_GMTP-WT_UT
ENSMUSG00000035042.2	Ccl5	0.579729	7.52066	7.89143	3.52994369377187e-06	0.000108792	4.3147	WT_GMTP-WT_UT
ENSMUSG00000032530.14	Lyzl4	-1.54684	0.949496	-7.89056	3.53398770128202e-06	0.000108792	4.83164	WT_GMTP-WT_UT
ENSMUSG00000046688.14	Tifa	0.376701	6.78333	7.89037	3.53491056798558e-06	0.000108792	4.33002	WT_GMTP-WT_UT
ENSMUSG00000031824.15	6430548M08Rik	-0.491329	5.93852	-7.88167	3.57598162558784e-06	0.000109905	4.34548	WT_GMTP-WT_UT
ENSMUSG00000018474.18	Chd3	-0.488658	7.82136	-7.86751	3.64389151033234e-06	0.000111838	4.27594	WT_GMTP-WT_UT
ENSMUSG00000031639.12	Tlr3	0.812697	4.54762	7.86483	3.65694735676602e-06	0.000112084	4.40464	WT_GMTP-WT_UT
ENSMUSG00000032741.9	Tpcn1	-0.503001	7.5902	-7.85439	3.70808380293847e-06	0.000113496	4.26159	WT_GMTP-WT_UT
ENSMUSG00000005672.12	Kit	-1.3738	1.56365	-7.85156	3.7220936125047e-06	0.000113769	4.74074	WT_GMTP-WT_UT
ENSMUSG00000039908.14	Slc26a11	-0.5435	5.69696	-7.84164	3.77163965801678e-06	0.000115125	4.29969	WT_GMTP-WT_UT
ENSMUSG00000106019.1	Gm43672	-1.12083	1.46026	-7.83232	3.81882267043198e-06	0.000116406	4.72328	WT_GMTP-WT_UT
ENSMUSG00000023832.14	Acat2	0.904397	3.04067	7.82385	3.86220596816291e-06	0.000117568	4.52931	WT_GMTP-WT_UT
ENSMUSG00000032333.6	Stoml1	0.442886	4.99208	7.8071	3.94962150040923e-06	0.000120062	4.28989	WT_GMTP-WT_UT
ENSMUSG00000103174.1	Gm37168	-1.19996	1.86645	-7.8061	3.95489452546347e-06	0.000120062	4.65157	WT_GMTP-WT_UT
ENSMUSG00000029007.8	Agtrap	0.464093	6.33015	7.79125	4.0342935580189e-06	0.000122306	4.20464	WT_GMTP-WT_UT
ENSMUSG00000052749.9	Trim30b	1.61441	1.7998	7.78904	4.04624789634324e-06	0.000122502	4.63502	WT_GMTP-WT_UT
ENSMUSG00000103847.1	Gm20056	-0.546139	3.55714	-7.77622	4.11638807286877e-06	0.00012436	4.39182	WT_GMTP-WT_UT
ENSMUSG00000037966.15	Ninj1	0.701309	7.60134	7.77579	4.1187581831262e-06	0.00012436	4.15091	WT_GMTP-WT_UT
ENSMUSG00000015950.13	Ncf1	0.366787	8.46056	7.77247	4.13708730496395e-06	0.000124744	4.1338	WT_GMTP-WT_UT
ENSMUSG00000038188.17	Scarf1	0.616597	4.99674	7.75656	4.22640604046277e-06	0.000127266	4.21859	WT_GMTP-WT_UT
ENSMUSG00000066684.10	Pilrb1	1.08066	2.11601	7.7554	4.23300582937175e-06	0.000127293	4.55558	WT_GMTP-WT_UT
ENSMUSG00000039474.13	Wfs1	-0.511056	4.02386	-7.751	4.25809038511055e-06	0.000127875	4.29874	WT_GMTP-WT_UT
ENSMUSG00000032122.15	Slc37a2	-0.401539	9.20802	-7.74976	4.26521070076874e-06	0.000127916	4.09565	WT_GMTP-WT_UT
ENSMUSG00000040699.13	Limd2	0.511984	6.98997	7.74477	4.29392935716934e-06	0.000128605	4.12023	WT_GMTP-WT_UT
ENSMUSG00000047712.8	Ust	0.847696	3.14206	7.74143	4.31320829767345e-06	0.000128864	4.40088	WT_GMTP-WT_UT
ENSMUSG00000035439.13	Haus8	-0.493646	5.94788	-7.74127	4.31414005812542e-06	0.000128864	4.14806	WT_GMTP-WT_UT
ENSMUSG00000057337.13	Chst3	-1.63005	1.66313	-7.73212	4.36759216024215e-06	0.000130286	4.57071	WT_GMTP-WT_UT
ENSMUSG00000026077.15	Npas2	-1.44776	1.10243	-7.72291	4.42212503583065e-06	0.000131737	4.6012	WT_GMTP-WT_UT
ENSMUSG00000074227.12	Spint2	2.427	-0.83277	7.71657	4.46003908356118e-06	0.000132689	4.54739	WT_GMTP-WT_UT
ENSMUSG00000033863.2	Klf9	-0.676376	4.49429	-7.70601	4.5240106607658e-06	0.000134413	4.18688	WT_GMTP-WT_UT
ENSMUSG00000021365.15	Nedd9	-0.755937	3.42845	-7.69972	4.56260922114443e-06	0.00013538	4.30225	WT_GMTP-WT_UT
ENSMUSG00000033530.8	Ttc7b	-0.43006	5.22409	-7.693	4.60415688336876e-06	0.000136431	4.1146	WT_GMTP-WT_UT
ENSMUSG00000047242.14	Taf9b	-0.733622	2.51824	-7.69147	4.61369028415934e-06	0.000136532	4.41762	WT_GMTP-WT_UT
ENSMUSG00000048078.16	Tenm4	-0.96595	1.44208	-7.67915	4.69114199771269e-06	0.000138492	4.51797	WT_GMTP-WT_UT
ENSMUSG00000020901.13	Pik3r5	0.348265	8.14956	7.67897	4.69231361671097e-06	0.000138492	4.00511	WT_GMTP-WT_UT
ENSMUSG00000052837.7	Junb	0.716313	7.34416	7.67295	4.73069309335785e-06	0.00013944	4.01034	WT_GMTP-WT_UT
ENSMUSG00000028273.15	Pdlim5	-0.480564	7.44715	-7.67121	4.74182817037941e-06	0.000139584	4.00575	WT_GMTP-WT_UT
ENSMUSG00000026980.15	Ly75	0.751878	3.63602	7.66323	4.79332346706158e-06	0.000140914	4.22293	WT_GMTP-WT_UT
ENSMUSG00000046841.5	Ckap4	-0.422594	4.94769	-7.65936	4.81856439092053e-06	0.000141469	4.08454	WT_GMTP-WT_UT
ENSMUSG00000014164.15	Klhl3	-1.24374	0.675525	-7.64832	4.89118493014513e-06	0.000143413	4.52141	WT_GMTP-WT_UT
ENSMUSG00000042712.10	Tceal9	-0.465148	5.65474	-7.64683	4.90109466327422e-06	0.000143515	4.02665	WT_GMTP-WT_UT
ENSMUSG00000041164.15	Zmiz2	0.429255	7.14723	7.63437	4.98464008621272e-06	0.00014577	3.9597	WT_GMTP-WT_UT
ENSMUSG00000006517.5	Mvd	0.718894	4.52675	7.63124	5.00586051981851e-06	0.000146133	4.07793	WT_GMTP-WT_UT
ENSMUSG00000032737.13	Inppl1	-0.377302	8.12645	-7.63061	5.01016850500974e-06	0.000146133	3.93648	WT_GMTP-WT_UT
ENSMUSG00000036381.13	P2ry14	0.403785	6.0964	7.62742	5.03190360723265e-06	0.000146576	3.9807	WT_GMTP-WT_UT
ENSMUSG00000027215.13	Cd82	0.543738	6.39491	7.62259	5.06502364683858e-06	0.000147348	3.96353	WT_GMTP-WT_UT
ENSMUSG00000044674.6	Fzd1	0.655938	2.64645	7.61299	5.13163743129907e-06	0.000149091	4.29076	WT_GMTP-WT_UT
ENSMUSG00000019850.11	Tnfaip3	0.428749	5.54636	7.61085	5.14658608062843e-06	0.000149189	3.98061	WT_GMTP-WT_UT
ENSMUSG00000035735.10	Dagla	-0.594065	4.45327	-7.61059	5.14838193377503e-06	0.000149189	4.05544	WT_GMTP-WT_UT
ENSMUSG00000027646.15	Src	0.69114	5.62026	7.60807	5.1660812157158e-06	0.000149421	3.97302	WT_GMTP-WT_UT
ENSMUSG00000030978.10	Rrm1	-0.403795	5.54006	-7.60754	5.16977948683215e-06	0.000149421	3.9762	WT_GMTP-WT_UT
ENSMUSG00000118087.1	4833438C02Rik	0.849388	2.31623	7.56562	5.47393835483505e-06	0.000158008	4.26852	WT_GMTP-WT_UT
ENSMUSG00000026827.12	Gpd2	0.620562	4.61285	7.56279	5.4951069212675e-06	0.000158414	3.97275	WT_GMTP-WT_UT
ENSMUSG00000020649.11	Rrm2	-0.628895	3.73127	-7.56137	5.50582187171414e-06	0.000158493	4.06613	WT_GMTP-WT_UT
ENSMUSG00000054027.8	Nt5dc3	-0.38218	4.88308	-7.56054	5.51206820112205e-06	0.000158493	3.94825	WT_GMTP-WT_UT
ENSMUSG00000000489.7	Pdgfb	-0.541787	6.56076	-7.55752	5.53487639193228e-06	0.000158944	3.86513	WT_GMTP-WT_UT
ENSMUSG00000032324.11	Tspan3	0.435427	5.96335	7.55134	5.58179783171918e-06	0.000160021	3.87695	WT_GMTP-WT_UT
ENSMUSG00000023022.14	Lima1	-0.379767	6.46156	-7.55017	5.59076520883301e-06	0.000160021	3.85765	WT_GMTP-WT_UT
ENSMUSG00000038037.5	Socs1	1.31015	1.26628	7.54931	5.59731606554599e-06	0.000160021	4.35459	WT_GMTP-WT_UT
ENSMUSG00000031792.15	Usb1	0.448578	5.80103	7.54882	5.60105623931421e-06	0.000160021	3.88005	WT_GMTP-WT_UT
ENSMUSG00000066258.13	Trim12a	0.566212	5.24693	7.54679	5.61665159922888e-06	0.000160261	3.90479	WT_GMTP-WT_UT
ENSMUSG00000029484.12	Anxa3	-0.372603	6.91601	-7.5297	5.74967393873478e-06	0.000163847	3.81524	WT_GMTP-WT_UT
ENSMUSG00000004266.15	Ptpn6	0.367988	8.89362	7.51759	5.84590028581106e-06	0.000166377	3.76604	WT_GMTP-WT_UT
ENSMUSG00000111171.1	Gm47815	-1.41191	0.745704	-7.50312	5.96322464380844e-06	0.000169333	4.32335	WT_GMTP-WT_UT
ENSMUSG00000079491.9	H2-T10	0.681178	3.34412	7.50291	5.96493793419687e-06	0.000169333	4.03578	WT_GMTP-WT_UT
ENSMUSG00000043157.8	Arl11	-0.399283	7.41659	-7.49893	5.9976347585192e-06	0.000170045	3.75933	WT_GMTP-WT_UT
ENSMUSG00000026749.11	Nek6	-0.523001	5.27788	-7.48195	6.13937439931913e-06	0.000173683	3.80974	WT_GMTP-WT_UT
ENSMUSG00000025491.14	Ifitm1	2.0037	-0.630669	7.48169	6.14151385684196e-06	0.000173683	4.2745	WT_GMTP-WT_UT
ENSMUSG00000004296.14	Il12b	7.02789	-2.38464	7.47031	6.23857259718896e-06	0.000176204	3.89841	WT_GMTP-WT_UT
ENSMUSG00000042228.14	Lyn	0.302225	7.8285	7.46587	6.27686658084409e-06	0.000176929	3.70388	WT_GMTP-WT_UT
ENSMUSG00000030980.17	Knop1	-0.498183	6.47785	-7.46549	6.28011253484382e-06	0.000176929	3.73498	WT_GMTP-WT_UT
ENSMUSG00000057315.14	Arhgap24	-0.452554	4.29641	-7.46229	6.30785582048226e-06	0.000177487	3.85836	WT_GMTP-WT_UT
ENSMUSG00000026220.6	Slc16a14	-1.79533	-0.201115	-7.45754	6.3493784403644e-06	0.000178363	4.26926	WT_GMTP-WT_UT
ENSMUSG00000109675.2	Nxpe1-ps	-0.616128	4.52587	-7.4569	6.35498177172545e-06	0.000178363	3.82827	WT_GMTP-WT_UT
ENSMUSG00000016349.10	Eef1a2	-1.02345	3.67585	-7.45427	6.37807306541151e-06	0.000178786	3.92013	WT_GMTP-WT_UT
ENSMUSG00000021549.14	Rasa1	-0.554158	6.95527	-7.4443	6.46644740122061e-06	0.000181036	3.69075	WT_GMTP-WT_UT
ENSMUSG00000027346.15	Gpcpd1	-0.452566	5.70805	-7.42823	6.61161202169293e-06	0.000184868	3.71003	WT_GMTP-WT_UT
ENSMUSG00000029915.14	Clec5a	0.519916	4.93402	7.42573	6.63452930460965e-06	0.000185277	3.75038	WT_GMTP-WT_UT
ENSMUSG00000036304.14	Zdhhc23	1.58749	0.176613	7.42198	6.66905204877905e-06	0.000186008	4.22808	WT_GMTP-WT_UT
ENSMUSG00000036138.16	Acaa1a	0.579843	6.94991	7.42063	6.68145959200551e-06	0.000186122	3.65652	WT_GMTP-WT_UT
ENSMUSG00000030259.12	Rassf8	-0.557146	5.71837	-7.41588	6.72560398264298e-06	0.000187118	3.69164	WT_GMTP-WT_UT
ENSMUSG00000066682.11	Pilrb2	0.643281	2.71481	7.41169	6.76470785129633e-06	0.000187971	3.99653	WT_GMTP-WT_UT
ENSMUSG00000026942.13	Traf2	0.529689	4.76609	7.4082	6.79745533677235e-06	0.000188646	3.73734	WT_GMTP-WT_UT
ENSMUSG00000042190.12	Cmklr1	0.638768	5.4283	7.39221	6.94988663875456e-06	0.000192637	3.67137	WT_GMTP-WT_UT
ENSMUSG00000028076.12	Cd1d1	0.612753	3.14698	7.38964	6.97470193804307e-06	0.000193085	3.9021	WT_GMTP-WT_UT
ENSMUSG00000071637.5	Cebpd	1.25716	3.38328	7.38875	6.98334353979093e-06	0.000193085	3.86641	WT_GMTP-WT_UT
ENSMUSG00000020826.9	Nos2	2.21272	1.72786	7.38726	6.99777153870428e-06	0.000193244	4.08706	WT_GMTP-WT_UT
ENSMUSG00000029207.16	Apbb2	-0.575193	5.72806	-7.38179	7.05107006201622e-06	0.000194475	3.64161	WT_GMTP-WT_UT
ENSMUSG00000031451.6	Gas6	-0.410483	7.92232	-7.36246	7.2430806026768e-06	0.000199525	3.55186	WT_GMTP-WT_UT
ENSMUSG00000039456.10	Morc3	0.361123	6.60965	7.35915	7.27656438491098e-06	0.000200067	3.57626	WT_GMTP-WT_UT
ENSMUSG00000097471.8	5830432E09Rik	-0.723825	3.18951	-7.35874	7.28069915709423e-06	0.000200067	3.85131	WT_GMTP-WT_UT
ENSMUSG00000028111.4	Ctsk	-0.515733	5.66184	-7.35228	7.34645794788461e-06	0.000201625	3.60153	WT_GMTP-WT_UT
ENSMUSG00000049225.14	Pdp1	-0.419426	5.77472	-7.34894	7.3806888922231e-06	0.000202316	3.5916	WT_GMTP-WT_UT
ENSMUSG00000033545.14	Znrf1	0.406077	5.74441	7.34464	7.42507282662959e-06	0.000203283	3.58665	WT_GMTP-WT_UT
ENSMUSG00000022575.5	Gsdmd	0.482499	6.93661	7.34304	7.44165427093574e-06	0.000203487	3.54362	WT_GMTP-WT_UT
ENSMUSG00000031808.7	Slc27a1	-0.449103	7.95895	-7.3411	7.46179213424571e-06	0.000203788	3.52001	WT_GMTP-WT_UT
ENSMUSG00000042284.10	Itga1	1.19545	0.457586	7.33752	7.49905609273671e-06	0.000204556	4.10882	WT_GMTP-WT_UT
ENSMUSG00000026482.13	Rgl1	0.49446	6.08169	7.33361	7.54003081719271e-06	0.000205422	3.55656	WT_GMTP-WT_UT
ENSMUSG00000112023.1	Lilr4b	0.428922	8.37447	7.32452	7.63626353645117e-06	0.00020779	3.4901	WT_GMTP-WT_UT
ENSMUSG00000091144.2	Phf11c	1.11433	0.849686	7.30647	7.83125132383489e-06	0.000212836	4.04796	WT_GMTP-WT_UT
ENSMUSG00000089669.7	Tnfsf13	-0.81824	2.3807	-7.30461	7.85164495004447e-06	0.000213131	3.89002	WT_GMTP-WT_UT
ENSMUSG00000017146.12	Brca1	-0.617299	3.2022	-7.30014	7.90089646017373e-06	0.000214134	3.76462	WT_GMTP-WT_UT
ENSMUSG00000002104.11	Rapsn	-0.915733	1.59804	-7.29952	7.90778722840989e-06	0.000214134	3.97675	WT_GMTP-WT_UT
ENSMUSG00000085129.1	5031425F14Rik	-1.37808	1.2524	-7.29485	7.95966743683029e-06	0.000215278	4.00252	WT_GMTP-WT_UT
ENSMUSG00000038668.14	Lpar1	1.53367	-0.376496	7.28809	8.03532100167393e-06	0.000217061	4.03871	WT_GMTP-WT_UT
ENSMUSG00000033066.16	Gas7	0.38082	8.62242	7.2763	8.16917861956759e-06	0.00022041	3.41649	WT_GMTP-WT_UT
ENSMUSG00000047250.13	Ptgs1	-0.484472	4.48111	-7.27543	8.17912483833493e-06	0.000220412	3.56849	WT_GMTP-WT_UT
ENSMUSG00000050732.9	Vamp8	0.543806	7.27486	7.27402	8.19527956619143e-06	0.000220581	3.43423	WT_GMTP-WT_UT
ENSMUSG00000059714.13	Flot1	0.583206	5.74419	7.27008	8.24071697490351e-06	0.000221536	3.47728	WT_GMTP-WT_UT
ENSMUSG00000022346.16	Myc	-0.730411	2.0241	-7.26533	8.29583586231218e-06	0.00022275	3.88	WT_GMTP-WT_UT
ENSMUSG00000027848.12	Olfml3	-0.679808	3.96807	-7.25418	8.42660966666668e-06	0.000225989	3.59273	WT_GMTP-WT_UT
ENSMUSG00000042613.9	Pbxip1	0.376819	6.9518	7.25285	8.44241259641163e-06	0.000226141	3.41065	WT_GMTP-WT_UT
ENSMUSG00000031385.14	Plxnb3	-0.870491	2.47434	-7.24725	8.50908540979204e-06	0.000227654	3.79448	WT_GMTP-WT_UT
ENSMUSG00000037224.15	Zfyve28	-0.64232	5.63302	-7.24508	8.53507576219255e-06	0.000228076	3.44555	WT_GMTP-WT_UT
ENSMUSG00000004347.17	Pde1c	-2.14546	1.68553	-7.24223	8.56940650364793e-06	0.000228583	3.88612	WT_GMTP-WT_UT
ENSMUSG00000101903.1	Gm29291	-1.34003	0.546423	-7.24111	8.58287717946312e-06	0.000228583	3.97297	WT_GMTP-WT_UT
ENSMUSG00000026773.19	Pfkfb3	0.448007	6.26324	7.24095	8.58480158871945e-06	0.000228583	3.41373	WT_GMTP-WT_UT
ENSMUSG00000023992.14	Trem2	-0.419096	9.7818	-7.23934	8.60424230986593e-06	0.000228828	3.35518	WT_GMTP-WT_UT
ENSMUSG00000024899.7	Papss2	0.373766	4.36568	7.23394	8.66984515282388e-06	0.000230298	3.51861	WT_GMTP-WT_UT
ENSMUSG00000050395.9	Tnfsf15	0.659544	2.77031	7.22818	8.74045297959396e-06	0.000231897	3.72401	WT_GMTP-WT_UT
ENSMUSG00000029319.8	Coq2	0.418969	4.32968	7.22434	8.78789759221625e-06	0.000232879	3.50816	WT_GMTP-WT_UT
ENSMUSG00000052688.12	Rab7b	-0.298617	8.52854	-7.21763	8.87130731396237e-06	0.000234811	3.33074	WT_GMTP-WT_UT
ENSMUSG00000030681.18	Mvp	0.520396	7.61952	7.21575	8.89486549297386e-06	0.000235155	3.34106	WT_GMTP-WT_UT
ENSMUSG00000056692.13	Ilrun	0.332956	8.08659	7.21338	8.9245847527808e-06	0.000235662	3.3299	WT_GMTP-WT_UT
ENSMUSG00000073739.3	Gm16287	-0.984758	0.980742	-7.2088	8.98237929276445e-06	0.00023674	3.9028	WT_GMTP-WT_UT
ENSMUSG00000022415.12	Syngr1	-0.534525	7.26135	-7.20847	8.98663817192047e-06	0.00023674	3.33765	WT_GMTP-WT_UT
ENSMUSG00000071708.11	Sms	-0.406139	5.57382	-7.20435	9.0390439986559e-06	0.00023784	3.3883	WT_GMTP-WT_UT
ENSMUSG00000048498.7	Cd300e	0.934993	2.86716	7.20244	9.06341184089394e-06	0.000238089	3.67215	WT_GMTP-WT_UT
ENSMUSG00000030401.16	Rtn2	2.01569	0.0320939	7.2013	9.07794368573825e-06	0.000238089	3.93019	WT_GMTP-WT_UT
ENSMUSG00000038467.15	Chmp4b	0.494385	8.47676	7.2011	9.0805135379446e-06	0.000238089	3.30678	WT_GMTP-WT_UT
ENSMUSG00000026357.3	Rgs18	-0.515422	5.48757	-7.19177	9.20089866603346e-06	0.000240962	3.374	WT_GMTP-WT_UT
ENSMUSG00000019951.10	Uhrf1bp1l	-0.49373	6.25587	-7.18792	9.25109927638068e-06	0.000241993	3.33551	WT_GMTP-WT_UT
ENSMUSG00000061589.14	Dot1l	-0.552218	6.56758	-7.17155	9.46774722647886e-06	0.000247065	3.30101	WT_GMTP-WT_UT
ENSMUSG00000047875.6	Gpr157	-0.430692	5.21861	-7.17134	9.47056361231936e-06	0.000247065	3.35866	WT_GMTP-WT_UT
ENSMUSG00000079625.2	Tm4sf19	-0.620394	3.80473	-7.17077	9.47821590473174e-06	0.000247065	3.49063	WT_GMTP-WT_UT
ENSMUSG00000029472.13	Anapc5	0.343442	7.59581	7.16776	9.51864325900705e-06	0.000247772	3.27027	WT_GMTP-WT_UT
ENSMUSG00000042364.11	Snx18	0.357236	5.9655	7.16675	9.53231990689171e-06	0.000247772	3.31503	WT_GMTP-WT_UT
ENSMUSG00000090958.2	Lrrc32	-1.18156	1.82454	-7.16628	9.53865980078771e-06	0.000247772	3.76164	WT_GMTP-WT_UT
ENSMUSG00000029470.15	P2rx4	0.331418	9.0568	7.14872	9.77888469192191e-06	0.000253717	3.22379	WT_GMTP-WT_UT
ENSMUSG00000021306.11	Gpr137b	-0.313695	7.96119	-7.13848	9.92198762759591e-06	0.00025713	3.22041	WT_GMTP-WT_UT
ENSMUSG00000002105.15	Slc39a13	0.47476	4.01298	7.13654	9.94933736176267e-06	0.00025754	3.41401	WT_GMTP-WT_UT
ENSMUSG00000031779.3	Ccl22	3.89462	0.10435	7.13306	9.99858896227017e-06	0.000258515	3.83612	WT_GMTP-WT_UT
ENSMUSG00000032228.16	Tcf12	-0.406232	6.04511	-7.12684	1.00873216286992e-05	0.000260372	3.25245	WT_GMTP-WT_UT
ENSMUSG00000032013.6	Trim29	-1.00825	2.15489	-7.12639	1.00937630154084e-05	0.000260372	3.66277	WT_GMTP-WT_UT
ENSMUSG00000027227.7	Sord	-0.371882	6.25862	-7.12344	1.01362337129537e-05	0.000261166	3.23948	WT_GMTP-WT_UT
ENSMUSG00000111118.1	Gm6545	1.76145	4.09196	7.10281	1.04381215458892e-05	0.000268634	3.35444	WT_GMTP-WT_UT
ENSMUSG00000044749.13	Abca6	-1.65461	-0.169933	-7.09115	1.06129084213649e-05	0.000272818	3.779	WT_GMTP-WT_UT
ENSMUSG00000043832.13	Clec4a3	0.376652	7.09298	7.09017	1.06276917351217e-05	0.000272883	3.16534	WT_GMTP-WT_UT
ENSMUSG00000019966.18	Kitl	-0.755226	4.68426	-7.07499	1.08603518513507e-05	0.000278537	3.25356	WT_GMTP-WT_UT
ENSMUSG00000032261.16	Sh3bgrl2	-0.36705	6.25587	-7.07099	1.0922517700691e-05	0.00027981	3.16115	WT_GMTP-WT_UT
ENSMUSG00000027637.3	Rab5if	0.446645	5.79154	7.07015	1.09356513770603e-05	0.000279825	3.17827	WT_GMTP-WT_UT
ENSMUSG00000063800.5	Prpf38a	0.422272	5.00491	7.06487	1.10183635549011e-05	0.000281618	3.21383	WT_GMTP-WT_UT
ENSMUSG00000061666.6	Gdpd1	0.362433	5.70755	7.06018	1.10924726906027e-05	0.000282954	3.1671	WT_GMTP-WT_UT
ENSMUSG00000021665.9	Hexb	-0.312941	7.70515	-7.05996	1.10959800867758e-05	0.000282954	3.10715	WT_GMTP-WT_UT
ENSMUSG00000078532.9	Nkain1	-0.865105	3.04555	-7.05863	1.11170521322269e-05	0.000283168	3.43392	WT_GMTP-WT_UT
ENSMUSG00000002250.16	Ppard	0.42763	5.20457	7.05759	1.11335653202538e-05	0.000283265	3.18995	WT_GMTP-WT_UT
ENSMUSG00000010461.15	Eya4	-0.845104	3.41527	-7.04924	1.12674567007991e-05	0.000286197	3.36441	WT_GMTP-WT_UT
ENSMUSG00000051790.15	Nlgn2	0.706187	3.11428	7.0488	1.12744519889597e-05	0.000286197	3.40901	WT_GMTP-WT_UT
ENSMUSG00000017737.2	Mmp9	0.684321	3.25643	7.04139	1.13946722727283e-05	0.00028892	3.37638	WT_GMTP-WT_UT
ENSMUSG00000045896.14	Paip2b	-0.434242	4.78173	-7.03182	1.15519784232216e-05	0.000292576	3.18071	WT_GMTP-WT_UT
ENSMUSG00000028337.14	Coro2a	0.323199	7.18878	7.02991	1.15836470838359e-05	0.000293045	3.07257	WT_GMTP-WT_UT
ENSMUSG00000028184.12	Adgrl2	-0.611252	5.79828	-7.02864	1.16047126552056e-05	0.000293246	3.11567	WT_GMTP-WT_UT
ENSMUSG00000051379.12	Flrt3	1.27561	0.505738	7.02633	1.16432067853223e-05	0.000293643	3.67444	WT_GMTP-WT_UT
ENSMUSG00000022351.14	Sqle	0.496293	4.80434	7.02611	1.16467749148434e-05	0.000293643	3.17036	WT_GMTP-WT_UT
ENSMUSG00000034266.6	Batf	0.927243	2.52772	7.02062	1.17388466318069e-05	0.000295631	3.45567	WT_GMTP-WT_UT
ENSMUSG00000031295.13	Phka2	-0.389476	6.25352	-7.01848	1.17749427236748e-05	0.000296206	3.08235	WT_GMTP-WT_UT
ENSMUSG00000039853.18	Trim14	0.425766	6.09877	7.01602	1.18165682455497e-05	0.000296918	3.0843	WT_GMTP-WT_UT
ENSMUSG00000019874.11	Fabp7	-1.16941	1.69529	-7.00417	1.20194054116782e-05	0.000301675	3.5416	WT_GMTP-WT_UT
ENSMUSG00000049608.8	Gpr55	1.58972	-0.0805899	6.99803	1.21258110235147e-05	0.000304004	3.65104	WT_GMTP-WT_UT
ENSMUSG00000055639.16	Dach1	-0.867848	2.44694	-6.99094	1.2250034544935e-05	0.000306773	3.4236	WT_GMTP-WT_UT
ENSMUSG00000051497.15	Kcnj16	-1.57964	0.808615	-6.98852	1.22929008089674e-05	0.000307502	3.60242	WT_GMTP-WT_UT
ENSMUSG00000023805.17	Synj2	-0.446125	5.41411	-6.98621	1.23338090760681e-05	0.000308179	3.07056	WT_GMTP-WT_UT
ENSMUSG00000041926.15	Rnpep	0.416784	7.59254	6.98223	1.24046536518677e-05	0.000309603	2.99207	WT_GMTP-WT_UT
ENSMUSG00000032540.16	Abhd5	-0.347581	5.95478	-6.96988	1.26271118852995e-05	0.000314803	3.02042	WT_GMTP-WT_UT
ENSMUSG00000020189.15	Osbpl8	-0.583992	9.5587	-6.96891	1.26449130562459e-05	0.000314895	2.95102	WT_GMTP-WT_UT
ENSMUSG00000054733.9	Msra	-0.544426	5.0705	-6.96691	1.2681390426411e-05	0.000315451	3.0622	WT_GMTP-WT_UT
ENSMUSG00000027222.14	Pex16	0.74424	3.84989	6.95781	1.28487263770772e-05	0.000319258	3.16745	WT_GMTP-WT_UT
ENSMUSG00000022901.13	Cd86	0.687821	3.81804	6.95278	1.29423192277143e-05	0.000321226	3.16408	WT_GMTP-WT_UT
ENSMUSG00000054342.8	Kcnn4	-0.458396	7.26997	-6.94452	1.30976313878939e-05	0.000324719	2.94172	WT_GMTP-WT_UT
ENSMUSG00000061143.15	Maml3	-0.681246	2.8638	-6.94215	1.31425910381175e-05	0.000325472	3.28838	WT_GMTP-WT_UT
ENSMUSG00000019872.13	Smpdl3a	-0.293112	9.05063	-6.94066	1.31709148379433e-05	0.000325812	2.9108	WT_GMTP-WT_UT
ENSMUSG00000034484.8	Snx2	0.299286	7.96985	6.93949	1.31931987594406e-05	0.000326002	2.92084	WT_GMTP-WT_UT
ENSMUSG00000022895.16	Ets2	0.490961	4.16028	6.93391	1.33000118675755e-05	0.000328278	3.09339	WT_GMTP-WT_UT
ENSMUSG00000023031.8	Cela1	-0.772867	2.01642	-6.9311	1.33540838415942e-05	0.000329248	3.3947	WT_GMTP-WT_UT
ENSMUSG00000054702.14	Ap1s3	-0.715579	2.90416	-6.9243	1.34860487785822e-05	0.000332135	3.25559	WT_GMTP-WT_UT
ENSMUSG00000062190.12	Lancl2	-0.425433	4.86084	-6.90391	1.3890254484503e-05	0.000341713	2.98169	WT_GMTP-WT_UT
ENSMUSG00000026832.12	Cytip	-0.589277	4.85451	-6.90196	1.39296239470174e-05	0.000342304	2.9792	WT_GMTP-WT_UT
ENSMUSG00000032091.15	Tmprss4	1.64321	-1.87187	6.90018	1.3965548804963e-05	0.00034249	3.35883	WT_GMTP-WT_UT
ENSMUSG00000032412.8	Atp1b3	0.360691	8.52667	6.90006	1.39679100000667e-05	0.00034249	2.85362	WT_GMTP-WT_UT
ENSMUSG00000040907.15	Atp1a3	-0.408648	8.68726	-6.8988	1.39935921047636e-05	0.000342743	2.85007	WT_GMTP-WT_UT
ENSMUSG00000030275.6	Etnk1	0.494625	7.22818	6.88994	1.41745583629555e-05	0.000346661	2.85966	WT_GMTP-WT_UT
ENSMUSG00000103367.1	Gm38158	-0.606908	3.21982	-6.88945	1.41846262643816e-05	0.000346661	3.15462	WT_GMTP-WT_UT
ENSMUSG00000084918.1	Gm12708	-1.22472	0.323386	-6.87797	1.44229822735031e-05	0.000352101	3.47235	WT_GMTP-WT_UT
ENSMUSG00000029482.4	Aacs	0.482315	4.87186	6.87695	1.4444487011714e-05	0.00035224	2.93991	WT_GMTP-WT_UT
ENSMUSG00000052512.17	Nav2	-0.820187	5.02169	-6.86942	1.46033395409543e-05	0.000355725	2.91758	WT_GMTP-WT_UT
ENSMUSG00000047067.7	Dusp28	0.897189	3.03319	6.85782	1.48518200139897e-05	0.000360995	3.1357	WT_GMTP-WT_UT
ENSMUSG00000111818.1	Gm17749	-0.740106	2.73796	-6.85782	1.48520185081886e-05	0.000360995	3.18139	WT_GMTP-WT_UT
ENSMUSG00000025743.14	Sdc3	0.388091	10.375	6.85439	1.49262916305591e-05	0.000362405	2.77578	WT_GMTP-WT_UT
ENSMUSG00000014543.14	Klra17	-1.77035	-0.0181211	-6.84508	1.51301375498932e-05	0.000366955	3.43625	WT_GMTP-WT_UT
ENSMUSG00000050957.4	Insl6	0.488292	3.25895	6.84414	1.51507033039183e-05	0.000367055	3.08016	WT_GMTP-WT_UT
ENSMUSG00000001768.16	Rin2	-0.351838	7.68045	-6.8363	1.53249520855897e-05	0.000370874	2.76838	WT_GMTP-WT_UT
ENSMUSG00000040466.16	Blvrb	0.419156	7.09738	6.83436	1.53683679024731e-05	0.000371415	2.77786	WT_GMTP-WT_UT
ENSMUSG00000002797.9	Ggct	0.737808	2.50978	6.83381	1.53806194170627e-05	0.000371415	3.18008	WT_GMTP-WT_UT
ENSMUSG00000018983.9	E2f2	-0.490052	4.2125	-6.82951	1.54774265796597e-05	0.000373349	2.9293	WT_GMTP-WT_UT
ENSMUSG00000098055.1	Gm26947	-0.733497	2.20206	-6.82729	1.55277720313907e-05	0.000374159	3.21503	WT_GMTP-WT_UT
ENSMUSG00000029534.17	St7	0.666321	2.91976	6.82535	1.55718278355126e-05	0.000374816	3.10438	WT_GMTP-WT_UT
ENSMUSG00000022303.9	Dcstamp	-0.512322	4.72507	-6.82159	1.56575301917772e-05	0.000376472	2.86713	WT_GMTP-WT_UT
ENSMUSG00000032046.15	Abhd12	-0.354038	8.60713	-6.81827	1.57334769980362e-05	0.000377891	2.72775	WT_GMTP-WT_UT
ENSMUSG00000025574.13	Tk1	-0.602991	2.82554	-6.81687	1.57657171964924e-05	0.000378214	3.10608	WT_GMTP-WT_UT
ENSMUSG00000038481.13	Cdk19	-0.380061	6.37242	-6.81622	1.5780805990312e-05	0.000378214	2.77094	WT_GMTP-WT_UT
ENSMUSG00000028124.15	Gclm	0.422594	5.3609	6.81252	1.58662563661084e-05	0.000379854	2.80957	WT_GMTP-WT_UT
ENSMUSG00000022451.12	Twf1	0.34173	6.29269	6.80976	1.59304721149141e-05	0.000380618	2.76375	WT_GMTP-WT_UT
ENSMUSG00000018965.11	Ywhah	-0.288686	9.0033	-6.80968	1.5932291300609e-05	0.000380618	2.71113	WT_GMTP-WT_UT
ENSMUSG00000072109.11	A530040E14Rik	0.729841	2.87196	6.80726	1.59886539884039e-05	0.000381556	3.08439	WT_GMTP-WT_UT
ENSMUSG00000027035.10	Cers6	0.593796	7.40849	6.79595	1.62555464240398e-05	0.000387511	2.71182	WT_GMTP-WT_UT
ENSMUSG00000095028.6	Sirpb1b	-0.475507	4.19154	-6.79325	1.6319866859677e-05	0.000388629	2.87623	WT_GMTP-WT_UT
ENSMUSG00000032300.7	1700017B05Rik	-0.398921	6.18245	-6.79019	1.63931177248624e-05	0.000389957	2.73772	WT_GMTP-WT_UT
ENSMUSG00000001281.10	Itgb7	-0.518096	5.67436	-6.78478	1.65236498994908e-05	0.000392625	2.75067	WT_GMTP-WT_UT
ENSMUSG00000072949.6	Acot1	-0.752877	1.67685	-6.78408	1.65404524359687e-05	0.000392625	3.21932	WT_GMTP-WT_UT
ENSMUSG00000073002.9	Vamp5	0.821729	2.5126	6.78333	1.65586049954299e-05	0.000392638	3.10365	WT_GMTP-WT_UT
ENSMUSG00000080717.10	B230307C23Rik	0.683624	1.94353	6.78255	1.65775371728462e-05	0.000392669	3.18334	WT_GMTP-WT_UT
ENSMUSG00000037752.4	Xkr8	0.652586	3.30492	6.78143	1.66049422142824e-05	0.000392901	2.97795	WT_GMTP-WT_UT
ENSMUSG00000114761.1	Gm47242	1.88999	2.30549	6.77959	1.66496999477734e-05	0.000393543	3.12871	WT_GMTP-WT_UT
ENSMUSG00000027660.16	Skil	0.500534	6.55691	6.77712	1.67100851256936e-05	0.000394553	2.70489	WT_GMTP-WT_UT
ENSMUSG00000020089.8	Ppa1	0.597761	3.16606	6.77085	1.68644939890653e-05	0.000397777	2.98342	WT_GMTP-WT_UT
ENSMUSG00000034265.8	Zdhhc14	-0.441869	5.65312	-6.76722	1.69544288732005e-05	0.000399476	2.72472	WT_GMTP-WT_UT
ENSMUSG00000022051.15	Bnip3l	-0.325872	7.48221	-6.76494	1.70113129402122e-05	0.000400394	2.6626	WT_GMTP-WT_UT
ENSMUSG00000025986.6	Slc39a10	-0.504216	6.46798	-6.76058	1.71204252610734e-05	0.000402537	2.68229	WT_GMTP-WT_UT
ENSMUSG00000034738.8	Nostrin	-0.421302	4.91555	-6.75536	1.72522493209899e-05	0.00040521	2.75068	WT_GMTP-WT_UT
ENSMUSG00000030657.11	Xylt1	-0.852493	6.70578	-6.75329	1.73049316003322e-05	0.00040581	2.66371	WT_GMTP-WT_UT
ENSMUSG00000020134.13	Peli1	0.374272	5.75381	6.75292	1.73141515661895e-05	0.00040581	2.69804	WT_GMTP-WT_UT
ENSMUSG00000022358.7	Fbxo32	-0.558251	4.3578	-6.7406	1.76305901452616e-05	0.000412568	2.77732	WT_GMTP-WT_UT
ENSMUSG00000038855.10	Itpkb	-0.356461	7.48376	-6.74026	1.76394867883385e-05	0.000412568	2.6245	WT_GMTP-WT_UT
ENSMUSG00000043323.17	Fbrsl1	0.416685	4.96181	6.73835	1.76892497349886e-05	0.00041292	2.72104	WT_GMTP-WT_UT
ENSMUSG00000062373.8	Tmem65	-0.342278	7.11009	-6.73826	1.7691539921414e-05	0.00041292	2.62976	WT_GMTP-WT_UT
ENSMUSG00000027010.16	Slc25a12	0.390194	5.57434	6.73465	1.77857221228666e-05	0.000414684	2.67851	WT_GMTP-WT_UT
ENSMUSG00000054708.17	Ankrd24	0.618493	2.35537	6.72582	1.80183333021772e-05	0.000419669	3.04021	WT_GMTP-WT_UT
ENSMUSG00000019818.15	Cd164	0.384828	6.6356	6.70905	1.84693275527487e-05	0.000429725	2.59749	WT_GMTP-WT_UT
ENSMUSG00000028555.15	Ttc39a	-0.921924	0.590463	-6.70631	1.85441975857575e-05	0.000431017	3.20923	WT_GMTP-WT_UT
ENSMUSG00000060441.15	Trim5	0.537744	4.02861	6.69771	1.87809876270497e-05	0.000436067	2.74892	WT_GMTP-WT_UT
ENSMUSG00000036390.8	Gadd45a	-0.543259	5.30853	-6.69421	1.8878357565779e-05	0.000437872	2.63045	WT_GMTP-WT_UT
ENSMUSG00000084331.1	Gm8163	3.07552	-7.29063	6.68908	1.9021906401896e-05	0.000440743	1.07569	WT_GMTP-WT_UT
ENSMUSG00000022505.9	Emp2	-0.471333	3.8477	-6.68667	1.90897507782447e-05	0.000441856	2.75489	WT_GMTP-WT_UT
ENSMUSG00000073985.2	Gm10602	-0.862873	0.905354	-6.68412	1.91620309935428e-05	0.00044307	3.15178	WT_GMTP-WT_UT
ENSMUSG00000063694.5	Cycs	0.536891	5.86602	6.68184	1.92265847897606e-05	0.000444102	2.58312	WT_GMTP-WT_UT
ENSMUSG00000027303.18	Ptpra	-0.463185	7.83519	-6.67988	1.92824432504869e-05	0.000444932	2.52442	WT_GMTP-WT_UT
ENSMUSG00000036469.16	Marchf1	0.412477	6.88784	6.67111	1.95342617604675e-05	0.000450277	2.53146	WT_GMTP-WT_UT
ENSMUSG00000047881.14	Rell1	-0.320408	6.65123	-6.66672	1.96616228615705e-05	0.000452745	2.53138	WT_GMTP-WT_UT
ENSMUSG00000046687.6	Gm5424	1.76635	-0.474295	6.66521	1.97057515065363e-05	0.000452999	3.18349	WT_GMTP-WT_UT
ENSMUSG00000030327.8	Necap1	0.324126	6.02713	6.66495	1.97132620576713e-05	0.000452999	2.55025	WT_GMTP-WT_UT
ENSMUSG00000021108.18	Prkch	-0.347468	6.91438	-6.65476	2.00132671714008e-05	0.00045942	2.50531	WT_GMTP-WT_UT
ENSMUSG00000107428.1	Gm44154	1.16832	1.05222	6.6538	2.00416295693607e-05	0.000459598	3.09331	WT_GMTP-WT_UT
ENSMUSG00000034168.7	Irf2bpl	0.466899	6.06358	6.65094	2.01267378106224e-05	0.000461076	2.52701	WT_GMTP-WT_UT
ENSMUSG00000001467.5	Cyp51	0.463606	5.33076	6.64593	2.02768947768359e-05	0.000463594	2.5543	WT_GMTP-WT_UT
ENSMUSG00000024238.15	Zeb1	0.825958	2.42046	6.64589	2.02782308268465e-05	0.000463594	2.90893	WT_GMTP-WT_UT
ENSMUSG00000058258.14	Idi1	0.521184	3.3571	6.64499	2.03051284756909e-05	0.000463734	2.76102	WT_GMTP-WT_UT
ENSMUSG00000034957.10	Cebpa	-0.416249	7.98422	-6.64249	2.03806117472458e-05	0.000464982	2.46388	WT_GMTP-WT_UT
ENSMUSG00000037306.13	Man1c1	-0.365357	7.77614	-6.64131	2.04165375694075e-05	0.000465326	2.46545	WT_GMTP-WT_UT
ENSMUSG00000072437.4	Nanos1	-1.55545	0.343741	-6.63239	2.06884471796106e-05	0.000471042	3.11662	WT_GMTP-WT_UT
ENSMUSG00000032336.17	Nptn	-0.279779	8.79224	-6.62449	2.0932709863075e-05	0.000475755	2.42612	WT_GMTP-WT_UT
ENSMUSG00000021792.15	Prxl2a	-0.351174	4.82058	-6.62432	2.09380691232822e-05	0.000475755	2.5551	WT_GMTP-WT_UT
ENSMUSG00000001228.14	Uhrf1	-0.529713	3.57271	-6.61652	2.11824887155948e-05	0.000480819	2.68463	WT_GMTP-WT_UT
ENSMUSG00000068957.1	4930589L23Rik	-0.627429	2.46613	-6.61179	2.13319855685283e-05	0.00048372	2.84986	WT_GMTP-WT_UT
ENSMUSG00000048677.9	Tpcn2	-0.356231	6.97474	-6.60649	2.15007674565619e-05	0.000487021	2.42848	WT_GMTP-WT_UT
ENSMUSG00000114375.1	Gm31544	1.21836	-0.384085	6.60586	2.15212012020039e-05	0.000487021	3.09981	WT_GMTP-WT_UT
ENSMUSG00000022855.9	Senp2	-0.298523	6.76775	-6.59848	2.17589094162982e-05	0.000491901	2.4216	WT_GMTP-WT_UT
ENSMUSG00000038623.9	Tm6sf1	-0.400045	6.20101	-6.59708	2.18044414595222e-05	0.000492432	2.43787	WT_GMTP-WT_UT
ENSMUSG00000028362.2	Tnfsf8	-1.0499	-0.134399	-6.59575	2.1847657879959e-05	0.000492909	3.08252	WT_GMTP-WT_UT
ENSMUSG00000049709.4	Nlrp10	-0.823997	2.43441	-6.59016	2.20304386203238e-05	0.00049653	2.82153	WT_GMTP-WT_UT
ENSMUSG00000034522.10	Zfp395	-0.424113	5.43375	-6.58923	2.20610016411389e-05	0.000496718	2.46008	WT_GMTP-WT_UT
ENSMUSG00000030341.17	Tnfrsf1a	0.347009	7.32305	6.58745	2.21197512744629e-05	0.000497538	2.39037	WT_GMTP-WT_UT
ENSMUSG00000040128.9	Pnrc1	0.383162	6.6342	6.58031	2.23565507504497e-05	0.00050189	2.39715	WT_GMTP-WT_UT
ENSMUSG00000047747.10	Rnf150	-0.682683	6.30503	-6.58026	2.23582202651281e-05	0.00050189	2.40777	WT_GMTP-WT_UT
ENSMUSG00000068749.9	Psma5	0.434981	6.26451	6.57376	2.25763002325883e-05	0.000506276	2.39905	WT_GMTP-WT_UT
ENSMUSG00000029304.14	Spp1	-0.436535	10.1063	-6.56699	2.28057401171296e-05	0.000510908	2.33045	WT_GMTP-WT_UT
ENSMUSG00000023015.14	Racgap1	-0.479145	4.42787	-6.56275	2.29503832565603e-05	0.000513633	2.4947	WT_GMTP-WT_UT
ENSMUSG00000034343.14	Ube2f	0.414004	5.63041	6.56164	2.29887047127705e-05	0.000513975	2.40673	WT_GMTP-WT_UT
ENSMUSG00000039318.12	Rab3gap2	-0.384616	6.874	-6.55794	2.31160423537144e-05	0.000516305	2.3552	WT_GMTP-WT_UT
ENSMUSG00000055413.12	H2-Q5	0.993698	3.32587	6.54825	2.34535639921805e-05	0.000523319	2.61604	WT_GMTP-WT_UT
ENSMUSG00000040829.14	Zmynd15	0.509902	3.81121	6.54295	2.3640401772769e-05	0.000526961	2.53693	WT_GMTP-WT_UT
ENSMUSG00000069072.9	Slc7a14	-4.11415	-3.36327	-6.53788	2.38207023941117e-05	0.00053045	2.48227	WT_GMTP-WT_UT
ENSMUSG00000038527.9	C1rl	1.52831	1.24794	6.53428	2.39493641188084e-05	0.000532784	2.89384	WT_GMTP-WT_UT
ENSMUSG00000036438.14	Calm2	-0.329904	9.36092	-6.53003	2.41023438546492e-05	0.000535653	2.27424	WT_GMTP-WT_UT
ENSMUSG00000000682.7	Cd52	0.300832	8.70726	6.5244	2.43069003571201e-05	0.000539662	2.26998	WT_GMTP-WT_UT
ENSMUSG00000032470.17	Mras	-0.434298	3.80969	-6.51212	2.4758913753794e-05	0.000549151	2.48896	WT_GMTP-WT_UT
ENSMUSG00000031485.15	Plpbp	-0.354511	5.54518	-6.50612	2.49831077072578e-05	0.000553573	2.32395	WT_GMTP-WT_UT
ENSMUSG00000021477.9	Ctsl	-0.331576	10.9175	-6.504	2.50627989764011e-05	0.000554788	2.23278	WT_GMTP-WT_UT
ENSMUSG00000032487.8	Ptgs2	2.54819	1.4323	6.49575	2.53755706432933e-05	0.000561155	2.81428	WT_GMTP-WT_UT
ENSMUSG00000064373.12	Selenop	-0.348747	10.5915	-6.49292	2.54837892726947e-05	0.00056299	2.21434	WT_GMTP-WT_UT
ENSMUSG00000082481.1	Rps12-ps19	-4.4309	-4.53726	-6.49132	2.55450764278079e-05	0.000563786	1.9643	WT_GMTP-WT_UT
ENSMUSG00000067212.8	H2-T23	0.430136	9.79085	6.48601	2.57498503209546e-05	0.000567743	2.20336	WT_GMTP-WT_UT
ENSMUSG00000039982.8	Dtx4	-0.322261	6.49306	-6.4713	2.63268082571025e-05	0.000579891	2.23013	WT_GMTP-WT_UT
ENSMUSG00000002881.14	Nab1	0.395488	6.27887	6.46718	2.64907415083964e-05	0.000582749	2.2309	WT_GMTP-WT_UT
ENSMUSG00000042109.8	Csdc2	-3.79422	-4.15704	-6.46673	2.65087658306251e-05	0.000582749	2.08015	WT_GMTP-WT_UT
ENSMUSG00000026023.16	Cdk15	-1.21388	0.912606	-6.46463	2.65926502463366e-05	0.000584018	2.82298	WT_GMTP-WT_UT
ENSMUSG00000020464.15	Pnpt1	0.466609	5.07895	6.46299	2.66585614170642e-05	0.000584889	2.28361	WT_GMTP-WT_UT
ENSMUSG00000021266.16	Wars	0.379934	5.92417	6.45866	2.68333427146402e-05	0.000588146	2.23126	WT_GMTP-WT_UT
ENSMUSG00000091191.2	Gm17334	1.22455	-0.456277	6.45702	2.68996486663404e-05	0.00058902	2.88611	WT_GMTP-WT_UT
ENSMUSG00000051335.6	Gfod1	-0.949938	1.91027	-6.44687	2.73152855369486e-05	0.000597535	2.67762	WT_GMTP-WT_UT
ENSMUSG00000031389.17	Arhgap4	-0.350222	6.51361	-6.44499	2.73928847957197e-05	0.000598646	2.18784	WT_GMTP-WT_UT
ENSMUSG00000030105.8	Arl8b	-0.325044	8.17274	-6.4411	2.75542696220773e-05	0.000601584	2.14462	WT_GMTP-WT_UT
ENSMUSG00000016206.6	H2-M3	0.344465	6.04126	6.4375	2.770459194376e-05	0.000604274	2.19295	WT_GMTP-WT_UT
ENSMUSG00000038518.15	Jarid2	0.373034	5.43701	6.4319	2.79401348777448e-05	0.000608817	2.21246	WT_GMTP-WT_UT
ENSMUSG00000059447.13	Hadhb	-0.414832	6.02409	-6.42885	2.80691723827195e-05	0.000611032	2.17996	WT_GMTP-WT_UT
ENSMUSG00000018654.17	Ikzf1	0.335737	6.72199	6.4257	2.82034326613068e-05	0.000613356	2.15087	WT_GMTP-WT_UT
ENSMUSG00000038650.15	Rnh1	-0.432182	9.04785	-6.42404	2.8274176780438e-05	0.000614296	2.10855	WT_GMTP-WT_UT
ENSMUSG00000021670.14	Hmgcr	0.377629	5.73667	6.4228	2.83273797205456e-05	0.000614853	2.1829	WT_GMTP-WT_UT
ENSMUSG00000082109.1	Rpl19-ps12	-4.3312	-5.53939	-6.41998	2.84485003180429e-05	0.000616882	1.52298	WT_GMTP-WT_UT
ENSMUSG00000019876.15	Pkib	-0.381327	5.69133	-6.41665	2.85925737525677e-05	0.000619404	2.17522	WT_GMTP-WT_UT
ENSMUSG00000069744.7	Psmb3	0.448795	5.46968	6.41584	2.86275249806147e-05	0.00061956	2.18524	WT_GMTP-WT_UT
ENSMUSG00000039782.15	Cpeb2	-0.430635	5.36437	-6.41311	2.87461675937059e-05	0.000621524	2.18684	WT_GMTP-WT_UT
ENSMUSG00000016552.13	Foxred2	-0.432258	5.02784	-6.4094	2.89084109368337e-05	0.000624427	2.20223	WT_GMTP-WT_UT
ENSMUSG00000039671.18	Zmynd8	-0.353509	7.19579	-6.40577	2.906776159386e-05	0.000627262	2.10672	WT_GMTP-WT_UT
ENSMUSG00000066510.5	Ankdd1a	-0.824152	2.05453	-6.40238	2.92174609722386e-05	0.000629883	2.5883	WT_GMTP-WT_UT
ENSMUSG00000030365.11	Clec2i	-0.937583	1.08959	-6.39781	2.9420682444864e-05	0.000633652	2.70352	WT_GMTP-WT_UT
ENSMUSG00000048234.13	Rnf149	0.409699	8.76615	6.39346	2.96156484438579e-05	0.000637236	2.06216	WT_GMTP-WT_UT
ENSMUSG00000033697.16	Arhgap39	-0.422101	5.05177	-6.38625	2.9941594723791e-05	0.000643629	2.16389	WT_GMTP-WT_UT
ENSMUSG00000025473.16	Adam8	-0.285152	9.2342	-6.38559	2.99715152619395e-05	0.000643652	2.0462	WT_GMTP-WT_UT
ENSMUSG00000040084.9	Bub1b	-0.431355	4.37873	-6.37831	3.03049171926403e-05	0.000650186	2.20916	WT_GMTP-WT_UT
ENSMUSG00000003484.4	Cyp4f18	-1.00581	2.2108	-6.37664	3.03817099921248e-05	0.000651208	2.52505	WT_GMTP-WT_UT
ENSMUSG00000026548.4	Slamf9	-0.286279	6.27603	-6.3743	3.04899596475302e-05	0.000652901	2.08364	WT_GMTP-WT_UT
ENSMUSG00000004952.13	Rasa4	0.367132	8.22602	6.36827	3.07708956996178e-05	0.000658285	2.02804	WT_GMTP-WT_UT
ENSMUSG00000036833.16	Pnpla7	-0.31545	7.90349	-6.36716	3.08226897327384e-05	0.000658761	2.0311	WT_GMTP-WT_UT
ENSMUSG00000035382.9	Pcsk7	0.432752	5.27217	6.3637	3.09854488759485e-05	0.000661606	2.1137	WT_GMTP-WT_UT
ENSMUSG00000039126.10	Prune2	-0.645111	4.81878	-6.36126	3.11007903311312e-05	0.000663434	2.14134	WT_GMTP-WT_UT
ENSMUSG00000048965.9	Mrgpre	-0.376882	4.61968	-6.36011	3.11553639752722e-05	0.000663963	2.15671	WT_GMTP-WT_UT
ENSMUSG00000036989.16	Trim3	0.460345	5.46165	6.35305	3.14918315719976e-05	0.000670494	2.08583	WT_GMTP-WT_UT
ENSMUSG00000022094.15	Slc39a14	0.470219	3.77185	6.34974	3.16512905823922e-05	0.000673246	2.23821	WT_GMTP-WT_UT
ENSMUSG00000031146.6	Plp2	-0.347777	6.72223	-6.34489	3.18857699316515e-05	0.00067755	2.02223	WT_GMTP-WT_UT
ENSMUSG00000032575.16	Manf	0.397164	5.42789	6.3443	3.19143785205635e-05	0.00067755	2.07373	WT_GMTP-WT_UT
ENSMUSG00000031662.8	Snx20	0.458326	6.24053	6.3354	3.23507618051984e-05	0.000686162	2.02289	WT_GMTP-WT_UT
ENSMUSG00000037280.12	Galnt6	-0.363396	6.8605	-6.33386	3.24264976733748e-05	0.000686691	2.00069	WT_GMTP-WT_UT
ENSMUSG00000079173.11	Zan	-1.32153	0.0162294	-6.33365	3.24372701660493e-05	0.000686691	2.69248	WT_GMTP-WT_UT
ENSMUSG00000045231.5	BC106179	-2.5633	-2.94355	-6.33284	3.24771781344096e-05	0.000686885	2.38664	WT_GMTP-WT_UT
ENSMUSG00000026864.13	Hspa5	0.262482	9.87201	6.3318	3.25290217404368e-05	0.00068733	1.95799	WT_GMTP-WT_UT
ENSMUSG00000092212.3	Slc22a13b	4.05677	-4.95503	6.3272	3.2758085153414e-05	0.000691515	1.65005	WT_GMTP-WT_UT
ENSMUSG00000097328.7	Tnfsf12	-0.499818	5.26208	-6.32579	3.2828720549615e-05	0.000692351	2.05381	WT_GMTP-WT_UT
ENSMUSG00000035385.5	Ccl2	1.16037	1.34547	6.32248	3.29951346891119e-05	0.000694918	2.55869	WT_GMTP-WT_UT
ENSMUSG00000012443.4	Kif11	-0.700243	4.03989	-6.32213	3.30127314038793e-05	0.000694918	2.15904	WT_GMTP-WT_UT
ENSMUSG00000023010.15	Tmbim6	0.362614	9.67982	6.32101	3.30691111793197e-05	0.000695449	1.94114	WT_GMTP-WT_UT
ENSMUSG00000032462.14	Pik3cb	-0.400038	6.71688	-6.31989	3.31256611621359e-05	0.000695982	1.98241	WT_GMTP-WT_UT
ENSMUSG00000020375.9	Rufy1	-0.291493	6.31479	-6.31752	3.32459081975097e-05	0.000697851	1.99158	WT_GMTP-WT_UT
ENSMUSG00000055809.7	Dnaaf3	0.843331	3.1213	6.31525	3.33613252605657e-05	0.000699616	2.28292	WT_GMTP-WT_UT
ENSMUSG00000019796.12	Lrp11	0.457391	4.08547	6.31126	3.35651764941863e-05	0.00070323	2.13597	WT_GMTP-WT_UT
ENSMUSG00000026489.13	Coq8a	0.606661	3.56103	6.31057	3.36007472308525e-05	0.000703315	2.20626	WT_GMTP-WT_UT
ENSMUSG00000028031.6	Dkk2	-1.69405	2.03967	-6.30789	3.37386604694378e-05	0.000704609	2.4431	WT_GMTP-WT_UT
ENSMUSG00000058317.12	Ube2e2	0.620419	2.26077	6.30785	3.3740995821616e-05	0.000704609	2.4098	WT_GMTP-WT_UT
ENSMUSG00000021696.9	Elovl7	-1.0294	0.91292	-6.30753	3.37573262881601e-05	0.000704609	2.58373	WT_GMTP-WT_UT
ENSMUSG00000068129.5	Cst7	0.985083	2.22964	6.30471	3.39031930300823e-05	0.000706992	2.40962	WT_GMTP-WT_UT
ENSMUSG00000031154.15	Otud5	0.322288	6.83797	6.30077	3.41080721400384e-05	0.000710601	1.94833	WT_GMTP-WT_UT
ENSMUSG00000002871.14	Tpra1	-0.39827	6.44997	-6.29708	3.430160656506e-05	0.000713966	1.95425	WT_GMTP-WT_UT
ENSMUSG00000018548.15	Trim37	-0.377023	4.91279	-6.29595	3.43607969226568e-05	0.000714532	2.02998	WT_GMTP-WT_UT
ENSMUSG00000041058.15	Wwp1	-0.517853	8.10889	-6.29205	3.45665926631581e-05	0.000718142	1.9077	WT_GMTP-WT_UT
ENSMUSG00000072573.2	Gm10369	-2.14767	-2.82683	-6.29046	3.46510161373856e-05	0.000719226	2.36769	WT_GMTP-WT_UT
ENSMUSG00000020225.10	Tmbim4	0.399188	6.31672	6.28919	3.47183739648245e-05	0.000719955	1.94611	WT_GMTP-WT_UT
ENSMUSG00000028167.15	Bdh2	-1.56908	0.173737	-6.28487	3.49489489861072e-05	0.000723981	2.61066	WT_GMTP-WT_UT
ENSMUSG00000030029.14	Lrig1	-1.36426	0.307643	-6.28434	3.4977455441088e-05	0.000723981	2.601	WT_GMTP-WT_UT
ENSMUSG00000042082.7	Arsb	-0.340515	5.37996	-6.27783	3.53281706400185e-05	0.000729891	1.97012	WT_GMTP-WT_UT
ENSMUSG00000033105.12	Lss	0.396233	4.59025	6.27782	3.5328365664261e-05	0.000729891	2.02798	WT_GMTP-WT_UT
ENSMUSG00000021356.10	Irf4	-1.14777	1.20764	-6.27627	3.54128713642146e-05	0.00073096	2.50351	WT_GMTP-WT_UT
ENSMUSG00000032434.9	Cmtm6	0.269634	7.35221	6.27468	3.54992123975703e-05	0.000731726	1.89359	WT_GMTP-WT_UT
ENSMUSG00000032344.17	Cgas	0.487321	3.90795	6.27438	3.55156029208957e-05	0.000731726	2.09962	WT_GMTP-WT_UT
ENSMUSG00000044197.8	Gpr146	0.365969	5.92003	6.27328	3.55754169685783e-05	0.000732021	1.93603	WT_GMTP-WT_UT
ENSMUSG00000038244.14	Mical2	-0.644594	4.55205	-6.27282	3.56004218022638e-05	0.000732021	2.0236	WT_GMTP-WT_UT
ENSMUSG00000050106.17	Tmc8	-0.791277	1.72952	-6.27231	3.56283428075235e-05	0.000732021	2.43126	WT_GMTP-WT_UT
ENSMUSG00000112926.1	Gm7172	-3.5334	-7.17928	-6.26494	3.60338103895747e-05	0.000739671	0.800644	WT_GMTP-WT_UT
ENSMUSG00000023249.15	Parp3	0.454976	3.98011	6.25666	3.64949870309892e-05	0.000748449	2.062	WT_GMTP-WT_UT
ENSMUSG00000025745.12	Hadha	-0.263651	7.44691	-6.25317	3.66907768212786e-05	0.00075111	1.85693	WT_GMTP-WT_UT
ENSMUSG00000026158.11	Ogfrl1	0.351828	5.37195	6.25315	3.66920563264561e-05	0.00075111	1.93096	WT_GMTP-WT_UT
ENSMUSG00000042423.9	Fbrs	0.314817	6.88038	6.25239	3.67349632083091e-05	0.000751299	1.8694	WT_GMTP-WT_UT
ENSMUSG00000093388.1	Gm22655	-1.74429	-0.342624	-6.25149	3.67860128948092e-05	0.000751654	2.58347	WT_GMTP-WT_UT
ENSMUSG00000095029.1	Gm36079	1.08307	0.204641	6.24849	3.69558156470251e-05	0.000754433	2.55373	WT_GMTP-WT_UT
ENSMUSG00000052593.16	Adam17	0.285464	8.741	6.2461	3.70920398700636e-05	0.000756522	1.82629	WT_GMTP-WT_UT
ENSMUSG00000036636.10	Clcn7	0.319701	8.76167	6.24153	3.73532720736021e-05	0.000761154	1.81875	WT_GMTP-WT_UT
ENSMUSG00000089942.9	Pira2	-0.378313	5.93226	-6.23073	3.79799010075444e-05	0.000773217	1.86705	WT_GMTP-WT_UT
ENSMUSG00000021065.16	Fut8	0.360577	4.50598	6.22534	3.82961848828111e-05	0.000778945	1.95194	WT_GMTP-WT_UT
ENSMUSG00000003518.13	Dusp3	-0.309323	7.941	-6.22118	3.85426310867357e-05	0.000783244	1.79614	WT_GMTP-WT_UT
ENSMUSG00000002617.14	Zfp40	-0.467618	2.23201	-6.2188	3.86839508343968e-05	0.000785272	2.27379	WT_GMTP-WT_UT
ENSMUSG00000092564.2	BC051226	0.609731	3.14254	6.21832	3.87128123591129e-05	0.000785272	2.12523	WT_GMTP-WT_UT
ENSMUSG00000021457.14	Syk	0.293946	9.29295	6.21706	3.87879778222524e-05	0.000786082	1.77541	WT_GMTP-WT_UT
ENSMUSG00000027111.16	Itga6	-0.52312	7.15327	-6.21356	3.89977619967197e-05	0.000789616	1.7997	WT_GMTP-WT_UT
ENSMUSG00000040548.16	Tex2	-0.319823	5.8634	-6.2111	3.91460696997063e-05	0.000791263	1.83834	WT_GMTP-WT_UT
ENSMUSG00000105769.1	Gm43351	-0.549371	2.65018	-6.21104	3.91500154549161e-05	0.000791263	2.19445	WT_GMTP-WT_UT
ENSMUSG00000022469.17	Rapgef3	-0.895715	2.75855	-6.20993	3.92171353925001e-05	0.000791902	2.17492	WT_GMTP-WT_UT
ENSMUSG00000030161.8	Gabarapl1	-0.329392	7.01521	-6.20722	3.93809523961346e-05	0.000794491	1.79292	WT_GMTP-WT_UT
ENSMUSG00000030894.5	Tpp1	-0.28129	8.57672	-6.20558	3.94807759985009e-05	0.000795786	1.7625	WT_GMTP-WT_UT
ENSMUSG00000021423.6	Ly86	0.317811	7.39562	6.2029	3.96447506043479e-05	0.000798369	1.77687	WT_GMTP-WT_UT
ENSMUSG00000004665.10	Cnn2	-0.38624	4.73388	-6.19129	4.03616049577588e-05	0.000812073	1.87604	WT_GMTP-WT_UT
ENSMUSG00000024856.10	Cdk2ap2	0.469315	5.56197	6.18788	4.05750930537718e-05	0.000815632	1.81536	WT_GMTP-WT_UT
ENSMUSG00000022967.13	Ifnar1	0.332358	7.29876	6.17956	4.11005142899825e-05	0.000825451	1.74128	WT_GMTP-WT_UT
ENSMUSG00000034247.9	Plekhm1	-0.294511	7.99439	-6.17412	4.14480059758943e-05	0.000831681	1.71911	WT_GMTP-WT_UT
ENSMUSG00000032231.14	Anxa2	-0.280721	9.08919	-6.17291	4.1525408543798e-05	0.000832486	1.70514	WT_GMTP-WT_UT
ENSMUSG00000074785.5	Plxnc1	-0.419913	8.01759	-6.17164	4.16075537116943e-05	0.000833384	1.71471	WT_GMTP-WT_UT
ENSMUSG00000022439.9	Parvg	-0.346455	5.16356	-6.16942	4.1750274458102e-05	0.000835492	1.80864	WT_GMTP-WT_UT
ENSMUSG00000013698.12	Pea15a	-0.28186	8.97469	-6.16839	4.18172316986699e-05	0.000836082	1.69863	WT_GMTP-WT_UT
ENSMUSG00000043953.12	Ccrl2	0.4411	5.19186	6.16651	4.19392972679799e-05	0.000837342	1.80203	WT_GMTP-WT_UT
ENSMUSG00000061126.5	Cyp4f39	-1.04047	1.21396	-6.16626	4.1955265503198e-05	0.000837342	2.33151	WT_GMTP-WT_UT
ENSMUSG00000040987.15	Mill2	0.674822	3.24808	6.16568	4.19930803588017e-05	0.000837347	2.02354	WT_GMTP-WT_UT
ENSMUSG00000040204.6	Pclaf	-0.615119	3.44921	-6.16274	4.21847372624533e-05	0.000840418	1.98666	WT_GMTP-WT_UT
ENSMUSG00000009090.17	Ap1b1	0.364812	7.6916	6.16122	4.22841346162776e-05	0.000841647	1.70337	WT_GMTP-WT_UT
ENSMUSG00000032515.8	Csrnp1	0.51849	3.01802	6.15932	4.24090725811579e-05	0.000843064	2.05107	WT_GMTP-WT_UT
ENSMUSG00000071547.4	Nt5dc2	0.434679	5.59311	6.15864	4.24532721043853e-05	0.000843064	1.76638	WT_GMTP-WT_UT
ENSMUSG00000030104.9	Edem1	-0.285779	8.22158	-6.15841	4.24686924579604e-05	0.000843064	1.69029	WT_GMTP-WT_UT
ENSMUSG00000051413.17	Plagl2	0.354082	6.13581	6.15502	4.26925948766399e-05	0.000845895	1.7363	WT_GMTP-WT_UT
ENSMUSG00000027827.17	Kcnab1	0.996078	0.962767	6.15496	4.26962537845378e-05	0.000845895	2.34258	WT_GMTP-WT_UT
ENSMUSG00000049625.6	Tifab	0.2617	7.41978	6.15453	4.27250124846928e-05	0.000845895	1.69794	WT_GMTP-WT_UT
ENSMUSG00000029299.14	Abcg3	-0.877476	2.40242	-6.14942	4.3064923672077e-05	0.000851868	2.13662	WT_GMTP-WT_UT
ENSMUSG00000012640.16	Zfp715	-0.462769	4.96903	-6.14878	4.31074383054135e-05	0.000851954	1.78861	WT_GMTP-WT_UT
ENSMUSG00000040703.11	Cyp2s1	-1.66817	0.116941	-6.14819	4.31466881588061e-05	0.000851975	2.40709	WT_GMTP-WT_UT
ENSMUSG00000022551.8	Cyc1	0.362021	5.73557	6.14262	4.35215827988175e-05	0.000858222	1.73337	WT_GMTP-WT_UT
ENSMUSG00000035914.11	Cd276	-0.731316	2.7406	-6.14235	4.35399803997964e-05	0.000858222	2.06987	WT_GMTP-WT_UT
ENSMUSG00000099974.1	Bcl2a1d	0.695958	3.99256	6.1403	4.3678603099681e-05	0.000860195	1.87315	WT_GMTP-WT_UT
ENSMUSG00000060131.11	Atp8b4	-0.50349	7.30164	-6.13726	4.38851450781731e-05	0.0008635	1.67253	WT_GMTP-WT_UT
ENSMUSG00000042439.13	Zfp532	-0.802589	1.00631	-6.1335	4.41420496418621e-05	0.00086779	2.30428	WT_GMTP-WT_UT
ENSMUSG00000053007.9	Creb5	0.554492	5.19125	6.13182	4.42572112656186e-05	0.000869288	1.74582	WT_GMTP-WT_UT
ENSMUSG00000023147.17	Get1	-0.435367	4.09961	-6.13048	4.43495850401465e-05	0.000870336	1.84365	WT_GMTP-WT_UT
ENSMUSG00000058254.12	Tspan7	-0.94985	2.32877	-6.12818	4.45085086564773e-05	0.000872687	2.1145	WT_GMTP-WT_UT
ENSMUSG00000030134.11	Rasgef1a	-0.642816	3.06111	-6.12739	4.45634151136391e-05	0.000872997	1.99259	WT_GMTP-WT_UT
ENSMUSG00000005237.14	Dnah2	-1.06619	0.514259	-6.12299	4.48692707655736e-05	0.000878218	2.33759	WT_GMTP-WT_UT
ENSMUSG00000040528.15	Milr1	0.29391	6.57447	6.12127	4.49889040831806e-05	0.000879144	1.66611	WT_GMTP-WT_UT
ENSMUSG00000021536.7	Adcy2	-0.888382	0.920865	-6.12118	4.49953864694548e-05	0.000879144	2.29441	WT_GMTP-WT_UT
ENSMUSG00000020681.14	Ace	-1.15003	-0.474069	-6.11933	4.51251331091701e-05	0.000880383	2.38956	WT_GMTP-WT_UT
ENSMUSG00000048756.11	Foxo3	-0.413553	7.31377	-6.11915	4.51377247474455e-05	0.000880383	1.64277	WT_GMTP-WT_UT
ENSMUSG00000025059.16	Gk	0.423486	4.94713	6.11802	4.52167093716338e-05	0.000881153	1.74035	WT_GMTP-WT_UT
ENSMUSG00000064289.15	Tank	0.447385	5.9697	6.11562	4.53858219573338e-05	0.000883677	1.67902	WT_GMTP-WT_UT
ENSMUSG00000037217.15	Syn1	0.472152	4.38412	6.10791	4.5934134730548e-05	0.000893573	1.77442	WT_GMTP-WT_UT
ENSMUSG00000004071.13	Cdip1	-0.314645	5.12738	-6.10715	4.59883145297617e-05	0.000893848	1.71001	WT_GMTP-WT_UT
ENSMUSG00000038301.15	Snx10	0.366042	7.09428	6.10388	4.62232613841153e-05	0.000897632	1.62312	WT_GMTP-WT_UT
ENSMUSG00000028410.13	Dnaja1	0.317036	7.42878	6.1007	4.64527911158205e-05	0.000901305	1.61012	WT_GMTP-WT_UT
ENSMUSG00000038147.13	Cd84	-0.29281	9.77394	-6.1001	4.64959100130241e-05	0.000901358	1.5836	WT_GMTP-WT_UT
ENSMUSG00000031016.9	Wee1	-0.477274	3.81749	-6.09838	4.66205784548632e-05	0.00090299	1.82865	WT_GMTP-WT_UT
ENSMUSG00000026879.14	Gsn	-0.344409	8.80292	-6.08651	4.74915672106577e-05	0.00091888	1.56669	WT_GMTP-WT_UT
ENSMUSG00000063018.6	2010204K13Rik	-1.95837	-2.05001	-6.08608	4.75232886907324e-05	0.00091888	2.25681	WT_GMTP-WT_UT
ENSMUSG00000022436.16	Sh3bp1	0.458841	3.65074	6.08382	4.76914130267638e-05	0.000921332	1.8286	WT_GMTP-WT_UT
ENSMUSG00000039774.12	Galnt12	-0.449034	3.95906	-6.08279	4.77675960604345e-05	0.000922006	1.78415	WT_GMTP-WT_UT
ENSMUSG00000030452.16	Nipa2	0.277132	6.09413	6.07784	4.81382160781773e-05	0.000928356	1.61227	WT_GMTP-WT_UT
ENSMUSG00000030269.14	Mtmr14	0.317093	5.87581	6.07676	4.82193825431854e-05	0.000929118	1.61963	WT_GMTP-WT_UT
ENSMUSG00000056569.11	Mpz	-1.59786	0.0768519	-6.07616	4.8264421429089e-05	0.000929184	2.29954	WT_GMTP-WT_UT
ENSMUSG00000032812.18	Arap1	0.356121	8.8816	6.06706	4.89555756830537e-05	0.000941677	1.53419	WT_GMTP-WT_UT
ENSMUSG00000097313.2	Gm26569	-1.4763	-0.0744535	-6.06603	4.90345513839032e-05	0.000942384	2.29322	WT_GMTP-WT_UT
ENSMUSG00000030595.15	Nfkbib	0.549234	4.79428	6.06521	4.90975127356882e-05	0.000942782	1.66617	WT_GMTP-WT_UT
ENSMUSG00000106847.1	Peg13	-0.419386	5.06222	-6.05677	4.97493056535996e-05	0.000954477	1.63226	WT_GMTP-WT_UT
ENSMUSG00000041075.8	Fzd7	-0.417478	5.4514	-6.05465	4.99142681432855e-05	0.000956819	1.60452	WT_GMTP-WT_UT
ENSMUSG00000048878.6	Hexim1	0.410529	6.22844	6.05397	4.99678434059944e-05	0.000957024	1.56813	WT_GMTP-WT_UT
ENSMUSG00000027506.15	Tpd52	-0.248621	8.82534	-6.05132	5.01756935163249e-05	0.00096018	1.50889	WT_GMTP-WT_UT
ENSMUSG00000020653.12	Klf11	-0.587778	3.08897	-6.03864	5.11814825404941e-05	0.000978588	1.84456	WT_GMTP-WT_UT
ENSMUSG00000030729.17	Pgm2l1	-0.460144	4.84582	-6.03486	5.14848521917473e-05	0.000983546	1.6125	WT_GMTP-WT_UT
ENSMUSG00000074361.11	C5ar2	-0.701838	2.74676	-6.03242	5.16822649331427e-05	0.000986473	1.89176	WT_GMTP-WT_UT
ENSMUSG00000029649.10	Pomp	0.374716	7.15752	6.03078	5.18153417225497e-05	0.000987556	1.50195	WT_GMTP-WT_UT
ENSMUSG00000024590.8	Lmnb1	-0.600817	3.33885	-6.03063	5.18275632383551e-05	0.000987556	1.79058	WT_GMTP-WT_UT
ENSMUSG00000029082.17	Bst1	0.428048	3.02758	6.02933	5.19334090513789e-05	0.000988729	1.83965	WT_GMTP-WT_UT
ENSMUSG00000037544.14	Dlgap5	-0.659234	3.04686	-6.02673	5.21454654403905e-05	0.00099192	1.83221	WT_GMTP-WT_UT
ENSMUSG00000022797.16	Tfrc	-0.404789	6.78695	-6.0259	5.22133414171056e-05	0.000992365	1.50377	WT_GMTP-WT_UT
ENSMUSG00000021250.13	Fos	0.355576	5.6056	6.01715	5.29349266063991e-05	0.00100462	1.53493	WT_GMTP-WT_UT
ENSMUSG00000019173.11	Rab5c	0.299563	8.46248	6.01699	5.29480946318404e-05	0.00100462	1.4562	WT_GMTP-WT_UT
ENSMUSG00000031659.13	Adcy7	-0.448174	8.74423	-6.01145	5.34108462425481e-05	0.00101205	1.44416	WT_GMTP-WT_UT
ENSMUSG00000063354.7	Slc39a4	1.1081	0.725774	6.01121	5.34307596746675e-05	0.00101205	2.14289	WT_GMTP-WT_UT
ENSMUSG00000089847.8	Timm10b	0.917881	1.59648	6.00832	5.36740460566465e-05	0.0010158	2.03215	WT_GMTP-WT_UT
ENSMUSG00000042331.13	Specc1	-0.472974	7.09295	-6.00704	5.37822102696499e-05	0.00101659	1.46457	WT_GMTP-WT_UT
ENSMUSG00000024975.13	Pdcd4	-0.369882	5.14286	-6.00675	5.38068656280177e-05	0.00101659	1.54486	WT_GMTP-WT_UT
ENSMUSG00000021003.10	Galc	-0.259548	7.86274	-6.00389	5.40487641873269e-05	0.0010203	1.44317	WT_GMTP-WT_UT
ENSMUSG00000078851.4	H2aw	0.591575	2.47539	5.99705	5.46327803192217e-05	0.00103045	1.87981	WT_GMTP-WT_UT
ENSMUSG00000009073.16	Nf2	-0.341488	7.08518	-5.99629	5.46979923827861e-05	0.00103081	1.44709	WT_GMTP-WT_UT
ENSMUSG00000044716.12	Dok7	-1.24743	-0.049729	-5.99514	5.47976101043117e-05	0.00103181	2.18304	WT_GMTP-WT_UT
ENSMUSG00000001517.14	Foxm1	-0.494701	2.87688	-5.99055	5.5194578329645e-05	0.00103841	1.80191	WT_GMTP-WT_UT
ENSMUSG00000029249.15	Rest	0.375315	5.578	5.98864	5.53600346001728e-05	0.00104065	1.48955	WT_GMTP-WT_UT
ENSMUSG00000022867.11	Usp25	0.417244	7.51399	5.97533	5.65327572613096e-05	0.0010618	1.40272	WT_GMTP-WT_UT
ENSMUSG00000007458.14	M6pr	0.257493	8.72638	5.97261	5.67753627607237e-05	0.00106546	1.38034	WT_GMTP-WT_UT
ENSMUSG00000114871.1	Gm21370	1.20803	-0.382005	5.96844	5.71497771775718e-05	0.00107158	2.15874	WT_GMTP-WT_UT
ENSMUSG00000031391.18	L1cam	-0.473471	4.22499	-5.96562	5.74043170127146e-05	0.00107545	1.55982	WT_GMTP-WT_UT
ENSMUSG00000050737.13	Ptges	1.24076	2.1548	5.96371	5.7577704295073e-05	0.00107779	1.87758	WT_GMTP-WT_UT
ENSMUSG00000041836.10	Ptpre	-0.345088	6.87493	-5.963	5.76421584529303e-05	0.0010781	1.39779	WT_GMTP-WT_UT
ENSMUSG00000079227.10	Ccr5	-0.315058	8.00707	-5.95826	5.8074432826833e-05	0.00108527	1.36561	WT_GMTP-WT_UT
ENSMUSG00000023066.10	Rttn	-0.621312	3.7274	-5.95099	5.87448101114722e-05	0.00109688	1.60058	WT_GMTP-WT_UT
ENSMUSG00000032890.17	Rims3	-0.674548	1.89395	-5.9475	5.90687860947983e-05	0.00110201	1.89155	WT_GMTP-WT_UT
ENSMUSG00000000058.6	Cav2	-0.372032	6.48366	-5.94446	5.93535439341936e-05	0.0011064	1.37906	WT_GMTP-WT_UT
ENSMUSG00000058655.9	Eif4b	-0.248982	9.04123	-5.94235	5.95518585676155e-05	0.00110917	1.32776	WT_GMTP-WT_UT
ENSMUSG00000009185.2	Ccl8	1.73068	-0.996352	5.93808	5.99546990741347e-05	0.00111574	2.12129	WT_GMTP-WT_UT
ENSMUSG00000020260.9	Pofut2	0.333329	5.62621	5.93528	6.02209604295916e-05	0.00111976	1.39904	WT_GMTP-WT_UT
ENSMUSG00000029405.16	G3bp2	0.288139	7.66468	5.93049	6.06786522041042e-05	0.00112733	1.32562	WT_GMTP-WT_UT
ENSMUSG00000015709.9	Arnt2	-1.63096	-0.432018	-5.92226	6.14734338069194e-05	0.00114115	2.09007	WT_GMTP-WT_UT
ENSMUSG00000071528.4	Atp5md	0.333978	5.22994	5.91848	6.18426152611769e-05	0.00114704	1.39364	WT_GMTP-WT_UT
ENSMUSG00000067149.6	Jchain	-4.28074	-3.48715	-5.91314	6.23674843628119e-05	0.00115492	1.69829	WT_GMTP-WT_UT
ENSMUSG00000059436.13	Max	0.313494	7.17785	5.91261	6.24204105708058e-05	0.00115492	1.30656	WT_GMTP-WT_UT
ENSMUSG00000021363.14	Mak	-0.69117	1.5997	-5.91258	6.2422657481335e-05	0.00115492	1.87799	WT_GMTP-WT_UT
ENSMUSG00000025647.16	Shisa5	0.296821	9.04828	5.90981	6.26971210672781e-05	0.00115904	1.27383	WT_GMTP-WT_UT
ENSMUSG00000022817.15	Itgb5	-0.431378	9.09889	-5.9063	6.30467090935018e-05	0.00116454	1.26764	WT_GMTP-WT_UT
ENSMUSG00000020629.12	Adi1	-0.343626	5.41713	-5.90407	6.32708439816123e-05	0.00116771	1.35861	WT_GMTP-WT_UT
ENSMUSG00000022698.17	Naa50	-0.319396	7.98911	-5.9003	6.36494377598673e-05	0.00117373	1.26995	WT_GMTP-WT_UT
ENSMUSG00000025236.11	Adpgk	0.39179	4.63281	5.89431	6.42575132091987e-05	0.00118396	1.39957	WT_GMTP-WT_UT
ENSMUSG00000058624.13	Gda	0.546617	4.4507	5.89044	6.46535391643472e-05	0.00119028	1.41106	WT_GMTP-WT_UT
ENSMUSG00000062515.3	Fabp4	-0.458896	7.44012	-5.8885	6.48526121462241e-05	0.00119296	1.26056	WT_GMTP-WT_UT
ENSMUSG00000085448.1	Gm13963	-0.865553	0.785394	-5.88585	6.51256218020579e-05	0.00119699	1.93821	WT_GMTP-WT_UT
ENSMUSG00000057789.14	Bak1	0.375772	6.26965	5.88367	6.53516631320221e-05	0.00120016	1.28582	WT_GMTP-WT_UT
ENSMUSG00000021277.16	Traf3	0.404157	5.30351	5.88257	6.5466287232043e-05	0.00120127	1.3297	WT_GMTP-WT_UT
ENSMUSG00000029428.13	Stx2	0.294683	6.58278	5.87944	6.57921429727099e-05	0.00120626	1.26813	WT_GMTP-WT_UT
ENSMUSG00000037443.13	Cep85	0.437815	4.98592	5.8781	6.59323551646811e-05	0.00120784	1.34347	WT_GMTP-WT_UT
ENSMUSG00000001166.17	Oas1c	0.527599	2.84259	5.87741	6.60048114746531e-05	0.00120818	1.62275	WT_GMTP-WT_UT
ENSMUSG00000029816.10	Gpnmb	-0.299896	14.3924	-5.8759	6.6163645702807e-05	0.00120912	1.24737	WT_GMTP-WT_UT
ENSMUSG00000031879.14	Ciao2b	0.550652	4.60034	5.87588	6.61648576575867e-05	0.00120912	1.37197	WT_GMTP-WT_UT
ENSMUSG00000054008.9	Ndst1	-0.439977	7.40574	-5.87483	6.62758605461398e-05	0.00120938	1.23859	WT_GMTP-WT_UT
ENSMUSG00000024981.6	Acsl5	0.278079	6.97017	5.87472	6.62876281542612e-05	0.00120938	1.24895	WT_GMTP-WT_UT
ENSMUSG00000036086.16	Zranb3	-0.435903	4.7728	-5.87391	6.63730477837636e-05	0.00120975	1.35322	WT_GMTP-WT_UT
ENSMUSG00000020788.15	Atp2a3	-0.611328	3.16833	-5.8735	6.64161541362615e-05	0.00120975	1.56145	WT_GMTP-WT_UT
ENSMUSG00000018986.10	Slfn3	1.00992	4.32338	5.86911	6.68814365480267e-05	0.00121723	1.38919	WT_GMTP-WT_UT
ENSMUSG00000035674.13	Ndufa3	0.399767	5.0489	5.86741	6.70627447783099e-05	0.00121954	1.32123	WT_GMTP-WT_UT
ENSMUSG00000025010.14	Ccnj	0.540194	2.96666	5.86679	6.71285860654197e-05	0.00121974	1.58435	WT_GMTP-WT_UT
ENSMUSG00000035367.9	Rmi1	-0.429177	4.45781	-5.86612	6.71994747269748e-05	0.00122003	1.37005	WT_GMTP-WT_UT
ENSMUSG00000005125.13	Ndrg1	-0.332786	6.27854	-5.85398	6.85103973835692e-05	0.00124282	1.23615	WT_GMTP-WT_UT
ENSMUSG00000086291.1	Gm15513	-0.579443	2.79483	-5.84342	6.96734059905597e-05	0.00126286	1.57502	WT_GMTP-WT_UT
ENSMUSG00000036206.12	Sh3bp4	0.477073	3.69736	5.84292	6.97283435035034e-05	0.00126286	1.4267	WT_GMTP-WT_UT
ENSMUSG00000031604.10	Msmo1	0.361618	5.96556	5.84108	6.99335779587752e-05	0.00126555	1.22704	WT_GMTP-WT_UT
ENSMUSG00000005973.6	Rcn1	0.628247	2.75593	5.83857	7.02135622091683e-05	0.00126959	1.57374	WT_GMTP-WT_UT
ENSMUSG00000025375.15	Aatk	-0.509738	5.09063	-5.83349	7.07844893573526e-05	0.00127888	1.262	WT_GMTP-WT_UT
ENSMUSG00000116234.1	Gm49550	-4.37167	-5.5925	-5.83244	7.09031909531883e-05	0.00127999	0.946552	WT_GMTP-WT_UT
ENSMUSG00000008035.12	Mid1ip1	-0.400453	6.46824	-5.83033	7.1142588757644e-05	0.00128327	1.19012	WT_GMTP-WT_UT
ENSMUSG00000055200.7	Sertad3	0.522234	4.27639	5.81403	7.30178615057342e-05	0.00131603	1.30314	WT_GMTP-WT_UT
ENSMUSG00000115230.1	AU022793	-0.470005	4.01152	-5.81058	7.34221926303845e-05	0.00132133	1.3298	WT_GMTP-WT_UT
ENSMUSG00000036905.8	C1qb	0.32182	10.7312	5.81051	7.34302279193452e-05	0.00132133	1.10549	WT_GMTP-WT_UT
ENSMUSG00000035064.17	Eef2k	-0.471919	4.25172	-5.80187	7.44513668748181e-05	0.00133862	1.28576	WT_GMTP-WT_UT
ENSMUSG00000097990.1	Gm19557	-1.15966	-0.909035	-5.80028	7.46410353134515e-05	0.00134095	1.91428	WT_GMTP-WT_UT
ENSMUSG00000026683.14	Nuf2	-0.661437	2.55498	-5.79491	7.52852131012728e-05	0.00135144	1.53607	WT_GMTP-WT_UT
ENSMUSG00000013846.10	St3gal1	0.376276	7.29061	5.78963	7.59240872253539e-05	0.00136181	1.09907	WT_GMTP-WT_UT
ENSMUSG00000027435.8	Cd93	-0.512214	9.53906	-5.78232	7.68180815509905e-05	0.00137674	1.0586	WT_GMTP-WT_UT
ENSMUSG00000030711.16	Sult1a1	-0.868484	1.97896	-5.77984	7.71233566705922e-05	0.0013811	1.60567	WT_GMTP-WT_UT
ENSMUSG00000024900.5	Cpt1a	-0.284064	7.49578	-5.776	7.76005133663814e-05	0.00138853	1.07169	WT_GMTP-WT_UT
ENSMUSG00000055546.6	Timd4	-1.00417	0.669354	-5.77172	7.81341109487703e-05	0.00139666	1.76858	WT_GMTP-WT_UT
ENSMUSG00000019832.5	Rab32	0.339954	6.46732	5.77069	7.82630692959812e-05	0.00139666	1.09045	WT_GMTP-WT_UT
ENSMUSG00000043300.2	B3galnt1	-0.374439	5.14733	-5.77042	7.82979835504733e-05	0.00139666	1.15281	WT_GMTP-WT_UT
ENSMUSG00000020101.14	Vsir	-0.289263	9.5309	-5.77036	7.8305263440758e-05	0.00139666	1.03857	WT_GMTP-WT_UT
ENSMUSG00000007379.15	Dennd2c	-0.772681	2.33925	-5.76892	7.84856198581726e-05	0.00139876	1.52956	WT_GMTP-WT_UT
ENSMUSG00000042292.18	Mrtfa	-0.334616	7.07142	-5.75977	7.96467543547625e-05	0.00141832	1.05436	WT_GMTP-WT_UT
ENSMUSG00000022433.20	Csnk1e	-0.327159	5.40378	-5.75686	8.00198793830959e-05	0.00142381	1.1141	WT_GMTP-WT_UT
ENSMUSG00000021224.15	Numb	-0.277661	6.43762	-5.75637	8.00825462585457e-05	0.00142381	1.06745	WT_GMTP-WT_UT
ENSMUSG00000026425.15	Srgap2	0.406924	7.66539	5.7551	8.02458782487737e-05	0.00142558	1.03322	WT_GMTP-WT_UT
ENSMUSG00000005774.12	Rfx5	0.45331	3.33522	5.75422	8.0359480253001e-05	0.00142646	1.33612	WT_GMTP-WT_UT
ENSMUSG00000027306.15	Nusap1	-0.534914	3.03791	-5.74697	8.13008013721432e-05	0.00144202	1.37394	WT_GMTP-WT_UT
ENSMUSG00000115902.1	AC113595.1	1.66558	-0.2697	5.74298	8.18246247316537e-05	0.00145016	1.80458	WT_GMTP-WT_UT
ENSMUSG00000054364.5	Rhob	-0.299749	7.56123	-5.74043	8.21604348464237e-05	0.0014545	1.01062	WT_GMTP-WT_UT
ENSMUSG00000009406.13	Elk1	0.306425	4.49381	5.74013	8.21999818813483e-05	0.0014545	1.1563	WT_GMTP-WT_UT
ENSMUSG00000021608.15	Lpcat1	-0.263658	5.95308	-5.73761	8.25337745877725e-05	0.00145925	1.05449	WT_GMTP-WT_UT
ENSMUSG00000028894.18	Inpp5b	0.379545	5.503	5.73518	8.28574744801599e-05	0.00146382	1.07222	WT_GMTP-WT_UT
ENSMUSG00000049985.15	Ankrd55	-0.529076	1.79851	-5.73373	8.30511973738876e-05	0.00146447	1.55772	WT_GMTP-WT_UT
ENSMUSG00000115817.1	Gm30246	-3.01831	-3.17698	-5.73356	8.3073551175466e-05	0.00146447	1.56199	WT_GMTP-WT_UT
ENSMUSG00000033885.15	Pxk	0.311744	5.55596	5.73343	8.30912413836224e-05	0.00146447	1.06646	WT_GMTP-WT_UT
ENSMUSG00000078606.8	Gm4070	1.08117	4.87413	5.73222	8.32529751257054e-05	0.00146557	1.10869	WT_GMTP-WT_UT
ENSMUSG00000020458.16	Rtn4	-0.266988	10.2206	-5.73198	8.32851586179065e-05	0.00146557	0.972924	WT_GMTP-WT_UT
ENSMUSG00000113757.1	Gm47507	-1.34324	-0.139999	-5.72654	8.40174658767893e-05	0.00147702	1.77042	WT_GMTP-WT_UT
ENSMUSG00000039952.15	Dag1	-0.348026	7.20135	-5.72607	8.40811842038067e-05	0.00147702	0.994464	WT_GMTP-WT_UT
ENSMUSG00000028367.5	Txn1	0.378519	7.6636	5.72558	8.41478805487778e-05	0.00147702	0.98361	WT_GMTP-WT_UT
ENSMUSG00000048216.13	Gpr85	0.428635	4.128	5.72519	8.42006226035725e-05	0.00147702	1.17221	WT_GMTP-WT_UT
ENSMUSG00000026809.15	Spaca9	-0.95596	1.85381	-5.71803	8.51765100164255e-05	0.00149296	1.5235	WT_GMTP-WT_UT
ENSMUSG00000021998.16	Lcp1	-0.256192	10.4479	-5.71465	8.56421579759485e-05	0.00149995	0.943954	WT_GMTP-WT_UT
ENSMUSG00000060063.9	Alox5ap	-0.300186	6.78261	-5.71164	8.60584328963723e-05	0.00150606	0.981303	WT_GMTP-WT_UT
ENSMUSG00000035181.6	Heatr5a	-0.562491	7.44347	-5.70996	8.62925217819477e-05	0.00150897	0.961792	WT_GMTP-WT_UT
ENSMUSG00000074578.14	Zfas1	0.310982	5.90824	5.70926	8.63893926841616e-05	0.00150948	1.0087	WT_GMTP-WT_UT
ENSMUSG00000031880.7	Rrad	0.732901	2.67733	5.70757	8.662485340835e-05	0.00151241	1.37044	WT_GMTP-WT_UT
ENSMUSG00000041939.14	Mvk	0.510633	3.76467	5.70584	8.6866757242206e-05	0.00151545	1.18867	WT_GMTP-WT_UT
ENSMUSG00000016541.10	Atxn10	-0.285284	6.35373	-5.70408	8.71136589682796e-05	0.00151857	0.982401	WT_GMTP-WT_UT
ENSMUSG00000106219.1	5830416I19Rik	-0.818466	1.80302	-5.70082	8.75742271430955e-05	0.0015254	1.50289	WT_GMTP-WT_UT
ENSMUSG00000040289.8	Hey1	-0.849724	2.31264	-5.7001	8.76753023010235e-05	0.0015255	1.4202	WT_GMTP-WT_UT
ENSMUSG00000043795.10	Prr33	-2.57873	-1.66444	-5.69981	8.77163152307205e-05	0.0015255	1.74366	WT_GMTP-WT_UT
ENSMUSG00000049744.15	Arhgap15	-0.311391	5.05338	-5.68963	8.91701552961533e-05	0.00154957	1.02359	WT_GMTP-WT_UT
ENSMUSG00000086763.1	Plxna4os1	-0.564036	1.53378	-5.68894	8.92691578511297e-05	0.00155009	1.52334	WT_GMTP-WT_UT
ENSMUSG00000029417.9	Cxcl9	0.635321	1.9845	5.68643	8.96324965249963e-05	0.00155519	1.45094	WT_GMTP-WT_UT
ENSMUSG00000079049.9	Serpinb1c	-1.23422	0.623479	-5.67529	9.12600877309961e-05	0.0015822	1.61833	WT_GMTP-WT_UT
ENSMUSG00000020475.3	Pgam2	0.880225	1.00201	5.6719	9.17621127287522e-05	0.00158966	1.56768	WT_GMTP-WT_UT
ENSMUSG00000026986.14	Hnmt	-0.368053	4.12024	-5.66818	9.23168313168322e-05	0.00159803	1.07741	WT_GMTP-WT_UT
ENSMUSG00000050777.7	Tmem37	-0.476001	4.92293	-5.6646	9.28528704238064e-05	0.00160607	0.991078	WT_GMTP-WT_UT
ENSMUSG00000024805.16	Pcgf5	0.440824	4.60618	5.66083	9.34218113759557e-05	0.00161466	1.01179	WT_GMTP-WT_UT
ENSMUSG00000037759.6	Ptger2	-0.546851	3.13788	-5.65728	9.39593825229676e-05	0.00162269	1.20727	WT_GMTP-WT_UT
ENSMUSG00000072889.9	Nfxl1	0.432806	5.54948	5.65427	9.44187075034766e-05	0.00162936	0.933412	WT_GMTP-WT_UT
ENSMUSG00000015202.13	Cnksr3	-0.431839	3.89027	-5.64023	9.65933187960057e-05	0.00166549	1.06055	WT_GMTP-WT_UT
ENSMUSG00000025648.18	Pfkfb4	-0.312979	6.07456	-5.63979	9.66615864472719e-05	0.00166549	0.884377	WT_GMTP-WT_UT
ENSMUSG00000020277.10	Pfkl	0.446499	5.4898	5.639	9.67858377043546e-05	0.00166634	0.910754	WT_GMTP-WT_UT
ENSMUSG00000025324.8	Atp10a	0.677963	3.21197	5.63718	9.70723251506601e-05	0.00166999	1.16087	WT_GMTP-WT_UT
ENSMUSG00000027843.13	Ptpn22	-0.285509	5.70803	-5.63338	9.76720297153222e-05	0.00167901	0.889893	WT_GMTP-WT_UT
ENSMUSG00000060802.8	B2m	0.297587	12.0592	5.63203	9.78861744782238e-05	0.0016814	0.812595	WT_GMTP-WT_UT
ENSMUSG00000031555.15	Adam9	0.315853	8.01694	5.63036	9.81528538077152e-05	0.00168468	0.816552	WT_GMTP-WT_UT
ENSMUSG00000027715.9	Ccna2	-0.514179	3.32592	-5.62768	9.85795643679112e-05	0.0016907	1.1258	WT_GMTP-WT_UT
ENSMUSG00000031376.15	Atp2b3	-2.08498	-1.72201	-5.62391	9.91851896778837e-05	0.00169971	1.62793	WT_GMTP-WT_UT
ENSMUSG00000024084.8	Qpct	-0.3534	5.30145	-5.62347	9.92568185185307e-05	0.00169971	0.895426	WT_GMTP-WT_UT
ENSMUSG00000026335.16	Pam	-0.314834	5.95399	-5.61782	0.000100172	0.00171406	0.852235	WT_GMTP-WT_UT
ENSMUSG00000049719.14	Prss46	-1.07031	0.78224	-5.6131	0.000100943	0.00172593	1.49889	WT_GMTP-WT_UT
ENSMUSG00000036944.6	Tmem71	-0.373982	4.6893	-5.61193	0.000101136	0.00172791	0.921556	WT_GMTP-WT_UT
ENSMUSG00000041571.9	Selenow	0.571726	4.66908	5.61033	0.000101399	0.00173107	0.920702	WT_GMTP-WT_UT
ENSMUSG00000089131.1	Gm24769	-3.08564	-7.22272	-5.60909	0.000101605	0.00173326	0.24143	WT_GMTP-WT_UT
ENSMUSG00000035725.13	Prkx	0.322669	7.0902	5.6086	0.000101686	0.00173332	0.798631	WT_GMTP-WT_UT
ENSMUSG00000048967.16	Yjefn3	2.29151	-2.3711	5.60594	0.000102126	0.0017395	1.54151	WT_GMTP-WT_UT
ENSMUSG00000049409.9	Prokr1	-0.673865	3.46819	-5.60394	0.000102459	0.00174383	1.06225	WT_GMTP-WT_UT
ENSMUSG00000037260.8	Hgsnat	0.265958	8.11131	5.60155	0.000102858	0.00174928	0.766211	WT_GMTP-WT_UT
ENSMUSG00000092009.1	Myh15	-1.63681	-0.645992	-5.60084	0.000102976	0.00174948	1.60051	WT_GMTP-WT_UT
ENSMUSG00000047606.4	Ankrd34c	-2.41629	-7.05028	-5.60055	0.000103026	0.00174948	0.282846	WT_GMTP-WT_UT
ENSMUSG00000024966.9	Stip1	0.277428	6.40444	5.59877	0.000103325	0.00175323	0.802439	WT_GMTP-WT_UT
ENSMUSG00000051220.2	Ercc6l	-0.517027	2.76257	-5.59685	0.000103648	0.00175649	1.17057	WT_GMTP-WT_UT
ENSMUSG00000070327.14	Rnf213	1.17937	9.42326	5.59669	0.000103675	0.00175649	0.745631	WT_GMTP-WT_UT
ENSMUSG00000047735.14	Samd9l	0.620928	7.73788	5.59583	0.000103821	0.00175762	0.762692	WT_GMTP-WT_UT
ENSMUSG00000015968.18	Cacna1d	-0.599586	4.54793	-5.59506	0.000103951	0.00175778	0.906174	WT_GMTP-WT_UT
ENSMUSG00000039943.16	Plcb4	-0.660367	1.43705	-5.59472	0.000104008	0.00175778	1.38202	WT_GMTP-WT_UT
ENSMUSG00000022831.14	Hcls1	0.345091	8.67854	5.59438	0.000104066	0.00175778	0.747012	WT_GMTP-WT_UT
ENSMUSG00000031609.3	Sap30	0.426406	5.40318	5.59347	0.000104221	0.00175906	0.838412	WT_GMTP-WT_UT
ENSMUSG00000016756.17	Cmah	-1.43913	1.24499	-5.59214	0.000104447	0.00176155	1.40478	WT_GMTP-WT_UT
ENSMUSG00000098320.1	Vis1	-1.06008	-0.0485212	-5.5895	0.000104896	0.00176779	1.54577	WT_GMTP-WT_UT
ENSMUSG00000064542.1	Gm22980	3.35069	-6.90759	5.58566	0.000105555	0.00177754	0.310113	WT_GMTP-WT_UT
ENSMUSG00000051022.7	Hs3st1	-3.21091	-3.98988	-5.58492	0.000105682	0.00177834	1.13873	WT_GMTP-WT_UT
ENSMUSG00000009569.14	Mrtfb	-0.631957	6.00112	-5.58313	0.000105991	0.0017822	0.791305	WT_GMTP-WT_UT
ENSMUSG00000031862.11	Atp13a1	0.307275	6.3997	5.58086	0.000106384	0.00178746	0.772148	WT_GMTP-WT_UT
ENSMUSG00000062825.15	Actg1	-0.301405	9.92367	-5.57948	0.000106624	0.00179015	0.714844	WT_GMTP-WT_UT
ENSMUSG00000036768.6	Kif15	-0.60192	2.44689	-5.57539	0.000107337	0.00179776	1.18941	WT_GMTP-WT_UT
ENSMUSG00000022586.11	Ly6i	1.74667	0.704965	5.5753	0.000107353	0.00179776	1.44634	WT_GMTP-WT_UT
ENSMUSG00000022186.14	Oxct1	-0.244087	8.1493	-5.57529	0.000107355	0.00179776	0.720957	WT_GMTP-WT_UT
ENSMUSG00000030126.17	Tmcc1	-0.348089	5.44978	-5.57503	0.0001074	0.00179776	0.804397	WT_GMTP-WT_UT
ENSMUSG00000026566.15	Mpzl1	-0.886285	2.94181	-5.57173	0.000107979	0.0018061	1.09716	WT_GMTP-WT_UT
ENSMUSG00000026600.12	Soat1	-0.25169	9.3188	-5.57115	0.000108081	0.00180646	0.702636	WT_GMTP-WT_UT
ENSMUSG00000024457.16	Trim26	0.269101	6.20725	5.56827	0.000108591	0.00181233	0.75774	WT_GMTP-WT_UT
ENSMUSG00000050232.6	Cxcr3	-0.791743	2.24243	-5.56825	0.000108595	0.00181233	1.21214	WT_GMTP-WT_UT
ENSMUSG00000030117.5	Gdf3	-0.38658	4.68681	-5.56617	0.000108965	0.00181713	0.844122	WT_GMTP-WT_UT
ENSMUSG00000021252.11	Erg28	0.333992	4.20928	5.56533	0.000109113	0.00181826	0.8928	WT_GMTP-WT_UT
ENSMUSG00000005413.8	Hmox1	0.289359	7.93779	5.5614	0.000109816	0.00182859	0.700563	WT_GMTP-WT_UT
ENSMUSG00000038366.15	Lasp1	-0.244721	8.87125	-5.55717	0.000110578	0.00183991	0.68184	WT_GMTP-WT_UT
ENSMUSG00000041028.16	Ghitm	0.244937	7.87487	5.55199	0.000111517	0.00185415	0.685544	WT_GMTP-WT_UT
ENSMUSG00000041765.6	Ubac2	0.316844	5.30383	5.5514	0.000111626	0.00185458	0.77282	WT_GMTP-WT_UT
ENSMUSG00000039428.11	Tmem135	-0.27177	5.96165	-5.55042	0.000111803	0.00185615	0.737283	WT_GMTP-WT_UT
ENSMUSG00000031358.17	Msl3	-0.302205	5.90201	-5.53949	0.000113821	0.00188825	0.721163	WT_GMTP-WT_UT
ENSMUSG00000029471.13	Camkk2	0.340612	6.56024	5.53374	0.000114898	0.00190352	0.686363	WT_GMTP-WT_UT
ENSMUSG00000004552.16	Ctse	-0.648608	2.18832	-5.53344	0.000114953	0.00190352	1.16277	WT_GMTP-WT_UT
ENSMUSG00000037679.9	Inf2	-0.328359	6.01584	-5.5332	0.000114998	0.00190352	0.705587	WT_GMTP-WT_UT
ENSMUSG00000105552.1	Gm19710	1.27167	-1.43764	5.53124	0.000115368	0.00190736	1.50019	WT_GMTP-WT_UT
ENSMUSG00000031504.6	Rab20	0.713841	3.39257	5.53107	0.000115401	0.00190736	0.951507	WT_GMTP-WT_UT
ENSMUSG00000036181.2	H1f2	-0.421594	5.79263	-5.53035	0.000115536	0.00190819	0.710635	WT_GMTP-WT_UT
ENSMUSG00000022758.14	P2rx6	-1.36761	-1.12946	-5.52532	0.000116493	0.00192256	1.49388	WT_GMTP-WT_UT
ENSMUSG00000085873.1	Ttc39aos1	-1.35485	-0.74304	-5.52361	0.000116819	0.00192652	1.48297	WT_GMTP-WT_UT
ENSMUSG00000021614.16	Vcan	1.02924	1.63785	5.51655	0.000118179	0.00194751	1.22236	WT_GMTP-WT_UT
ENSMUSG00000021768.15	Dusp13	-0.881135	0.0416384	-5.51562	0.000118359	0.00194903	1.41912	WT_GMTP-WT_UT
ENSMUSG00000027962.14	Vcam1	-0.383111	5.18285	-5.5142	0.000118634	0.00195213	0.717009	WT_GMTP-WT_UT
ENSMUSG00000032788.15	Pdxk	-0.392298	7.87636	-5.51118	0.000119224	0.00196039	0.61574	WT_GMTP-WT_UT
ENSMUSG00000087259.7	2610035D17Rik	-0.567573	2.41359	-5.5104	0.000119375	0.00196143	1.08579	WT_GMTP-WT_UT
ENSMUSG00000031530.6	Dusp4	-0.60307	4.61868	-5.50967	0.000119519	0.00196234	0.754076	WT_GMTP-WT_UT
ENSMUSG00000040712.16	Camta2	0.295544	7.11523	5.50598	0.000120244	0.0019728	0.622974	WT_GMTP-WT_UT
ENSMUSG00000053398.11	Phgdh	1.21311	1.06811	5.50401	0.000120635	0.00197776	1.28305	WT_GMTP-WT_UT
ENSMUSG00000033487.14	Fndc3a	0.439239	7.38434	5.5017	0.000121092	0.0019838	0.609202	WT_GMTP-WT_UT
ENSMUSG00000004846.10	Plod3	0.298712	7.3582	5.50114	0.000121205	0.00198418	0.608832	WT_GMTP-WT_UT
ENSMUSG00000040209.12	Zfp704	-0.557263	6.03216	-5.50053	0.000121325	0.00198469	0.649026	WT_GMTP-WT_UT
ENSMUSG00000025887.10	Casp12	1.24283	-0.756208	5.49859	0.000121712	0.00198956	1.44407	WT_GMTP-WT_UT
ENSMUSG00000032724.5	Abtb2	1.59968	0.0106086	5.49595	0.000122242	0.001996	1.39007	WT_GMTP-WT_UT
ENSMUSG00000027291.15	Vps39	-0.296538	6.82386	-5.49574	0.000122284	0.001996	0.613293	WT_GMTP-WT_UT
ENSMUSG00000045503.16	Sys1	0.389504	3.57439	5.49476	0.00012248	0.00199773	0.860525	WT_GMTP-WT_UT
ENSMUSG00000028800.15	Hdac1	0.334395	5.86797	5.49309	0.000122818	0.00200178	0.643356	WT_GMTP-WT_UT
ENSMUSG00000031480.15	Thsd1	-0.705321	0.830335	-5.49059	0.000123321	0.00200852	1.29179	WT_GMTP-WT_UT
ENSMUSG00000026675.12	Hsd17b7	0.629201	2.87762	5.48964	0.000123514	0.00201019	0.969444	WT_GMTP-WT_UT
ENSMUSG00000028641.16	P3h1	0.3632	3.89467	5.48831	0.000123785	0.00201312	0.802219	WT_GMTP-WT_UT
ENSMUSG00000024270.11	Slc39a6	-0.280651	6.39859	-5.48703	0.000124046	0.00201591	0.611916	WT_GMTP-WT_UT
ENSMUSG00000096316.7	Faiml	3.2209	-6.82425	5.47997	0.000125494	0.00203795	0.235273	WT_GMTP-WT_UT
ENSMUSG00000029330.8	Cds1	0.342052	4.58254	5.47441	0.000126648	0.00205519	0.697155	WT_GMTP-WT_UT
ENSMUSG00000047810.9	Ccdc88b	0.298878	6.68731	5.47306	0.000126928	0.00205824	0.578474	WT_GMTP-WT_UT
ENSMUSG00000040264.10	Gbp2b	2.04554	0.117783	5.46763	0.000128069	0.00207494	1.33418	WT_GMTP-WT_UT
ENSMUSG00000023050.9	Map3k12	-0.363203	4.31058	-5.46727	0.000128144	0.00207494	0.713646	WT_GMTP-WT_UT
ENSMUSG00000003812.13	Dnase2a	-0.333945	7.17498	-5.46617	0.000128376	0.0020772	0.553173	WT_GMTP-WT_UT
ENSMUSG00000085586.1	Gm11613	0.855728	2.33794	5.46393	0.00012885	0.00208336	1.02033	WT_GMTP-WT_UT
ENSMUSG00000109729.1	Gm45418	1.98157	-1.78148	5.45832	0.000130046	0.00210118	1.37713	WT_GMTP-WT_UT
ENSMUSG00000027367.16	Stard7	0.305079	5.24899	5.45612	0.00013052	0.0021073	0.613162	WT_GMTP-WT_UT
ENSMUSG00000025582.4	Nptx1	-1.80129	-0.0902993	-5.45329	0.00013113	0.00211562	1.32985	WT_GMTP-WT_UT
ENSMUSG00000050530.14	Fam171a1	-1.02198	0.629944	-5.45157	0.000131501	0.00212007	1.25205	WT_GMTP-WT_UT
ENSMUSG00000034987.4	Hrh2	0.95441	0.794719	5.45059	0.000131714	0.00212198	1.23016	WT_GMTP-WT_UT
ENSMUSG00000020263.14	Appl2	-0.30457	6.23456	-5.44604	0.000132707	0.00213635	0.547491	WT_GMTP-WT_UT
ENSMUSG00000038811.13	Gngt2	0.292524	7.06646	5.44562	0.000132798	0.00213635	0.520617	WT_GMTP-WT_UT
ENSMUSG00000033386.10	Frrs1	-0.298058	6.86549	-5.44405	0.000133143	0.00214036	0.523352	WT_GMTP-WT_UT
ENSMUSG00000041135.15	Ripk2	0.315199	3.93715	5.44351	0.000133262	0.00214072	0.719719	WT_GMTP-WT_UT
ENSMUSG00000001741.12	Il16	-0.867265	2.77607	-5.44272	0.000133435	0.00214198	0.907571	WT_GMTP-WT_UT
ENSMUSG00000048824.7	Gm568	-1.7052	-1.2831	-5.44056	0.000133911	0.00214807	1.36287	WT_GMTP-WT_UT
ENSMUSG00000026655.15	Fam107b	-0.365454	5.09166	-5.43435	0.000135292	0.00216865	0.586458	WT_GMTP-WT_UT
ENSMUSG00000023913.17	Pla2g7	0.295048	8.34642	5.43355	0.000135469	0.00216994	0.475431	WT_GMTP-WT_UT
ENSMUSG00000039067.5	Psmd7	0.333073	6.07716	5.43144	0.000135943	0.00217596	0.528516	WT_GMTP-WT_UT
ENSMUSG00000000532.11	Acvr1b	0.266854	6.03259	5.42894	0.000136504	0.00218338	0.526095	WT_GMTP-WT_UT
ENSMUSG00000031101.6	Sash3	-0.252712	7.00342	-5.4248	0.000137442	0.00219681	0.486381	WT_GMTP-WT_UT
ENSMUSG00000029819.6	Npy	-0.44257	6.57094	-5.42436	0.000137542	0.00219683	0.498376	WT_GMTP-WT_UT
ENSMUSG00000028035.13	Dnajb4	-0.424272	4.58842	-5.42292	0.00013787	0.00219952	0.608235	WT_GMTP-WT_UT
ENSMUSG00000027824.5	Vmn2r1	4.27294	-5.0951	5.42276	0.000137907	0.00219952	0.655765	WT_GMTP-WT_UT
ENSMUSG00000000088.7	Cox5a	0.402073	5.81371	5.42151	0.000138191	0.00220247	0.522956	WT_GMTP-WT_UT
ENSMUSG00000117234.1	Gm7818	1.41927	-0.502652	5.41999	0.000138539	0.00220556	1.30653	WT_GMTP-WT_UT
ENSMUSG00000021273.11	Fdft1	0.461746	3.8996	5.4198	0.000138583	0.00220556	0.684264	WT_GMTP-WT_UT
ENSMUSG00000043439.5	Epop	1.03157	1.04142	5.41817	0.000138957	0.00220995	1.14394	WT_GMTP-WT_UT
ENSMUSG00000049580.12	Tsku	0.523112	3.12523	5.41743	0.000139127	0.00221107	0.803337	WT_GMTP-WT_UT
ENSMUSG00000030774.13	Pak1	0.257421	6.63451	5.4162	0.000139409	0.00221397	0.482317	WT_GMTP-WT_UT
ENSMUSG00000028413.13	B4galt1	-0.249547	7.05496	-5.41291	0.000140169	0.00222447	0.464563	WT_GMTP-WT_UT
ENSMUSG00000004730.15	Adgre1	0.263492	11.23	5.41046	0.000140741	0.00223149	0.427726	WT_GMTP-WT_UT
ENSMUSG00000022034.10	Esco2	-0.846919	0.800843	-5.41015	0.000140812	0.00223149	1.16228	WT_GMTP-WT_UT
ENSMUSG00000030742.7	Lat	-0.982451	1.14544	-5.40703	0.000141541	0.00224145	1.11105	WT_GMTP-WT_UT
ENSMUSG00000070390.12	Nlrp1b	-0.610402	4.03364	-5.40577	0.000141836	0.00224453	0.642265	WT_GMTP-WT_UT
ENSMUSG00000082154.1	Gm16464	1.09477	0.857235	5.40504	0.000142007	0.00224564	1.14648	WT_GMTP-WT_UT
ENSMUSG00000026483.13	Fam129a	-0.434626	6.99814	-5.40415	0.000142218	0.00224738	0.450899	WT_GMTP-WT_UT
ENSMUSG00000073980.5	Gm9574	1.09798	0.232761	5.40331	0.000142415	0.00224845	1.21739	WT_GMTP-WT_UT
ENSMUSG00000020143.15	Dock2	-0.425239	9.10743	-5.403	0.000142487	0.00224845	0.415362	WT_GMTP-WT_UT
ENSMUSG00000028803.18	Nipal3	-0.348817	5.68698	-5.40133	0.000142882	0.00225309	0.494234	WT_GMTP-WT_UT
ENSMUSG00000031556.6	Tm2d2	0.333497	6.48867	5.39884	0.000143473	0.00226081	0.457079	WT_GMTP-WT_UT
ENSMUSG00000085295.7	4930430E12Rik	0.280374	5.76563	5.39521	0.000144337	0.00227282	0.479921	WT_GMTP-WT_UT
ENSMUSG00000024644.17	Cndp2	0.254539	9.40945	5.3938	0.000144675	0.00227654	0.397762	WT_GMTP-WT_UT
ENSMUSG00000047539.9	Fbxo28	-0.283676	5.90151	-5.38989	0.000145616	0.00228972	0.464361	WT_GMTP-WT_UT
ENSMUSG00000032997.16	Chpf	0.627271	2.54969	5.38526	0.000146738	0.00230574	0.849739	WT_GMTP-WT_UT
ENSMUSG00000025026.15	Add3	-0.368763	4.63853	-5.38419	0.000146997	0.00230768	0.536918	WT_GMTP-WT_UT
ENSMUSG00000020696.18	Rffl	0.431289	3.8895	5.3839	0.000147068	0.00230768	0.624005	WT_GMTP-WT_UT
ENSMUSG00000049659.15	Aftph	0.287013	7.16556	5.38041	0.000147921	0.00231944	0.405598	WT_GMTP-WT_UT
ENSMUSG00000115480.1	Gm49249	-1.05283	0.538782	-5.37788	0.000148545	0.00232759	1.14109	WT_GMTP-WT_UT
ENSMUSG00000027243.8	Harbi1	-0.426407	2.7882	-5.37267	0.000149834	0.00234614	0.785871	WT_GMTP-WT_UT
ENSMUSG00000041731.13	Pgm5	-1.21043	0.472857	-5.36582	0.000151548	0.00237131	1.12883	WT_GMTP-WT_UT
ENSMUSG00000020680.15	Taf15	0.227807	6.08878	5.36416	0.000151965	0.00237617	0.41192	WT_GMTP-WT_UT
ENSMUSG00000026458.13	Ppfia4	-0.349263	5.18211	-5.36361	0.000152104	0.00237668	0.458214	WT_GMTP-WT_UT
ENSMUSG00000029602.11	Rasal1	-0.876889	1.71093	-5.36054	0.000152882	0.00238682	0.948629	WT_GMTP-WT_UT
ENSMUSG00000025583.15	Rptor	-0.362582	6.34485	-5.36021	0.000152967	0.00238682	0.39528	WT_GMTP-WT_UT
ENSMUSG00000018102.5	H2bc4	0.267103	5.59722	5.3548	0.000154347	0.00240668	0.418498	WT_GMTP-WT_UT
ENSMUSG00000032766.9	Gng11	-0.48894	3.85088	-5.35189	0.000155095	0.00241636	0.574406	WT_GMTP-WT_UT
ENSMUSG00000004633.17	Chn2	-0.614031	2.25393	-5.35154	0.000155185	0.00241636	0.843841	WT_GMTP-WT_UT
ENSMUSG00000069607.4	Cd300ld3	-0.651349	4.58111	-5.35102	0.000155319	0.00241676	0.485008	WT_GMTP-WT_UT
ENSMUSG00000041671.13	Pyroxd1	-0.437124	2.5933	-5.35012	0.000155552	0.0024187	0.7819	WT_GMTP-WT_UT
ENSMUSG00000071669.14	Snx29	-0.530884	4.96243	-5.34863	0.000155938	0.00242301	0.447937	WT_GMTP-WT_UT
ENSMUSG00000089857.9	Zfp882	-0.726086	1.27435	-5.34771	0.000156178	0.00242505	0.993118	WT_GMTP-WT_UT
ENSMUSG00000054808.15	Actn4	-0.284044	8.60172	-5.34688	0.000156394	0.00242672	0.322616	WT_GMTP-WT_UT
ENSMUSG00000050029.7	Rap2c	0.366571	6.39969	5.34566	0.000156712	0.0024272	0.368176	WT_GMTP-WT_UT
ENSMUSG00000068854.7	H2bc21	-0.668259	2.99015	-5.34563	0.000156718	0.0024272	0.703875	WT_GMTP-WT_UT
ENSMUSG00000029730.16	Mcm7	-0.43128	4.517	-5.3455	0.000156751	0.0024272	0.48195	WT_GMTP-WT_UT
ENSMUSG00000031960.14	Aars	0.37014	6.59367	5.34226	0.000157599	0.00243863	0.355764	WT_GMTP-WT_UT
ENSMUSG00000042249.11	Grk3	0.393919	4.19662	5.33605	0.000159237	0.00246227	0.501365	WT_GMTP-WT_UT
ENSMUSG00000095788.6	Sirpb1a	-0.45322	3.67805	-5.33511	0.000159486	0.00246441	0.570657	WT_GMTP-WT_UT
ENSMUSG00000001999.15	Blvra	-0.310754	6.66656	-5.33329	0.000159969	0.00246702	0.337906	WT_GMTP-WT_UT
ENSMUSG00000027323.10	Rad51	-0.735952	2.2325	-5.33325	0.000159982	0.00246702	0.816271	WT_GMTP-WT_UT
ENSMUSG00000021215.15	Net1	-0.517206	2.36931	-5.33323	0.000159986	0.00246702	0.79257	WT_GMTP-WT_UT
ENSMUSG00000046034.8	Otulin	-0.511754	6.07709	-5.32964	0.000160946	0.0024801	0.352584	WT_GMTP-WT_UT
ENSMUSG00000027907.4	S100a11	-0.265928	7.63938	-5.3284	0.000161279	0.00248285	0.304899	WT_GMTP-WT_UT
ENSMUSG00000056305.4	Usp39	0.267063	5.04189	5.32796	0.000161397	0.00248285	0.406252	WT_GMTP-WT_UT
ENSMUSG00000041645.14	Ddx24	0.28884	6.88461	5.32736	0.000161558	0.00248285	0.321128	WT_GMTP-WT_UT
ENSMUSG00000040842.17	Szrd1	0.236822	7.18606	5.32732	0.000161569	0.00248285	0.313086	WT_GMTP-WT_UT
ENSMUSG00000030263.13	Lrmp	-0.265568	6.54977	-5.32375	0.000162534	0.00249436	0.325032	WT_GMTP-WT_UT
ENSMUSG00000016256.10	Ctsz	0.375633	11.0988	5.32372	0.000162542	0.00249436	0.276847	WT_GMTP-WT_UT
ENSMUSG00000019961.17	Tmpo	-0.302711	6.21835	-5.31868	0.000163911	0.00251365	0.328029	WT_GMTP-WT_UT
ENSMUSG00000037458.15	Azin1	-0.337592	7.14697	-5.31425	0.000165127	0.00253033	0.291361	WT_GMTP-WT_UT
ENSMUSG00000000204.16	Slfn4	1.44068	2.47495	5.31389	0.000165226	0.00253033	0.740942	WT_GMTP-WT_UT
ENSMUSG00000035232.8	Pdk3	0.364641	3.4848	5.31305	0.000165457	0.00253213	0.562876	WT_GMTP-WT_UT
ENSMUSG00000059895.13	Ptp4a3	0.557104	2.31044	5.31147	0.000165894	0.00253708	0.765622	WT_GMTP-WT_UT
ENSMUSG00000020272.8	Stk10	-0.37663	6.09162	-5.3094	0.000166469	0.00254298	0.316846	WT_GMTP-WT_UT
ENSMUSG00000004460.17	Dnajb11	0.257948	7.04014	5.30913	0.000166543	0.00254298	0.28522	WT_GMTP-WT_UT
ENSMUSG00000021508.11	Cxcl14	-0.563974	2.43155	-5.30851	0.000166715	0.00254298	0.739345	WT_GMTP-WT_UT
ENSMUSG00000028944.14	Prkag2	-0.360684	4.53375	-5.30844	0.000166736	0.00254298	0.416023	WT_GMTP-WT_UT
ENSMUSG00000028007.13	Snx7	-0.339671	4.88861	-5.30767	0.000166951	0.00254452	0.382794	WT_GMTP-WT_UT
ENSMUSG00000002504.15	Slc9a3r2	-1.5081	0.645005	-5.30724	0.000167069	0.00254458	1.01046	WT_GMTP-WT_UT
ENSMUSG00000038206.13	Fbxo8	-0.297371	4.73027	-5.30594	0.000167432	0.00254823	0.393085	WT_GMTP-WT_UT
ENSMUSG00000025212.17	Sfxn3	-0.30237	5.83	-5.30557	0.000167537	0.00254823	0.321578	WT_GMTP-WT_UT
ENSMUSG00000064043.13	Trerf1	-0.395761	5.77022	-5.30478	0.000167758	0.00254986	0.323078	WT_GMTP-WT_UT
ENSMUSG00000027900.15	Dram2	0.260005	7.3743	5.30328	0.000168177	0.00255449	0.266863	WT_GMTP-WT_UT
ENSMUSG00000019088.14	Dnase1l1	-0.265511	7.89874	-5.30193	0.000168557	0.00255851	0.254164	WT_GMTP-WT_UT
ENSMUSG00000018143.10	Mafk	0.327623	5.79123	5.30114	0.000168778	0.00256013	0.315757	WT_GMTP-WT_UT
ENSMUSG00000024613.16	Tcof1	0.315403	6.00167	5.29904	0.000169372	0.00256739	0.302648	WT_GMTP-WT_UT
ENSMUSG00000054293.10	P2ry10b	-0.387121	5.30949	-5.29849	0.000169528	0.00256801	0.337228	WT_GMTP-WT_UT
ENSMUSG00000047281.3	Sfn	0.68104	1.89778	5.29084	0.000171707	0.00259869	0.800119	WT_GMTP-WT_UT
ENSMUSG00000051043.16	Gprc5c	-0.491956	3.43679	-5.29042	0.000171829	0.00259869	0.531746	WT_GMTP-WT_UT
ENSMUSG00000026849.18	Tor1a	0.285941	5.37322	5.29016	0.000171903	0.00259869	0.318868	WT_GMTP-WT_UT
ENSMUSG00000000149.10	Gna12	-0.394582	7.77781	-5.2891	0.000172209	0.00260122	0.233948	WT_GMTP-WT_UT
ENSMUSG00000020744.13	Slc25a19	0.375925	4.79492	5.28877	0.000172303	0.00260122	0.357508	WT_GMTP-WT_UT
ENSMUSG00000034723.11	Tmx4	-0.381515	6.04575	-5.28405	0.000173669	0.00262006	0.274666	WT_GMTP-WT_UT
ENSMUSG00000076435.3	Acsf2	-0.459475	3.9923	-5.28286	0.000174015	0.00262351	0.435472	WT_GMTP-WT_UT
ENSMUSG00000035164.8	Zc3h12c	0.743298	4.11155	5.27965	0.000174951	0.00263584	0.414123	WT_GMTP-WT_UT
ENSMUSG00000015314.10	Slamf6	1.2799	0.339482	5.27882	0.000175194	0.00263683	0.999868	WT_GMTP-WT_UT
ENSMUSG00000040990.17	Sh3kbp1	-0.247957	7.28697	-5.27854	0.000175275	0.00263683	0.225842	WT_GMTP-WT_UT
ENSMUSG00000024845.17	Tmem134	0.35467	5.92605	5.27821	0.000175371	0.00263683	0.269649	WT_GMTP-WT_UT
ENSMUSG00000020120.15	Plek	0.300949	8.81514	5.27754	0.000175568	0.00263801	0.19996	WT_GMTP-WT_UT
ENSMUSG00000059518.14	Znhit1	0.402639	4.95191	5.27708	0.000175705	0.0026383	0.32462	WT_GMTP-WT_UT
ENSMUSG00000024795.11	Kif20b	-0.463268	3.70081	-5.27491	0.000176345	0.00264612	0.463054	WT_GMTP-WT_UT
ENSMUSG00000022463.8	Srebf2	0.27388	7.18425	5.27394	0.000176629	0.00264861	0.220266	WT_GMTP-WT_UT
ENSMUSG00000005897.14	Nr2c1	-0.30147	4.24916	-5.27024	0.000177728	0.00266329	0.381047	WT_GMTP-WT_UT
ENSMUSG00000020015.10	Cdk17	-0.358906	4.91702	-5.26681	0.000178752	0.00267684	0.309516	WT_GMTP-WT_UT
ENSMUSG00000022114.5	Spry2	-0.435519	2.61715	-5.26615	0.000178949	0.002678	0.633421	WT_GMTP-WT_UT
ENSMUSG00000074505.6	Fat3	-1.28276	3.51202	-5.26261	0.000180013	0.0026921	0.471158	WT_GMTP-WT_UT
ENSMUSG00000019487.11	Trip10	0.326156	5.13473	5.2609	0.000180528	0.00269801	0.283252	WT_GMTP-WT_UT
ENSMUSG00000023988.8	Bysl	0.35594	3.65144	5.25899	0.000181106	0.00270483	0.443025	WT_GMTP-WT_UT
ENSMUSG00000022508.5	Bcl6	-0.253636	6.50671	-5.2551	0.000182291	0.0027207	0.206981	WT_GMTP-WT_UT
ENSMUSG00000058013.11	Septin11	-0.280385	5.48724	-5.25391	0.000182654	0.00272431	0.249146	WT_GMTP-WT_UT
ENSMUSG00000116811.1	Gm16385	-1.40576	-2.59117	-5.25165	0.000183347	0.00273282	1.00316	WT_GMTP-WT_UT
ENSMUSG00000029752.12	Asns	0.533613	2.63124	5.24386	0.00018576	0.00276693	0.592446	WT_GMTP-WT_UT
ENSMUSG00000008036.11	Ap2s1	0.368625	6.86673	5.243	0.000186028	0.00276908	0.174718	WT_GMTP-WT_UT
ENSMUSG00000026187.9	Xrcc5	-0.625734	1.17172	-5.24251	0.000186182	0.00276952	0.830132	WT_GMTP-WT_UT
ENSMUSG00000020444.19	Guk1	0.340493	4.34107	5.2419	0.00018637	0.00277047	0.320882	WT_GMTP-WT_UT
ENSMUSG00000052861.13	Dnah6	-1.94176	-1.37961	-5.24034	0.00018686	0.0027759	1.05032	WT_GMTP-WT_UT
ENSMUSG00000032366.15	Tpm1	-0.232646	6.64587	-5.23957	0.0001871	0.00277762	0.175374	WT_GMTP-WT_UT
ENSMUSG00000086795.1	Gm11579	-2.04689	-2.68114	-5.23904	0.000187267	0.00277825	0.973716	WT_GMTP-WT_UT
ENSMUSG00000024663.20	Rab3il1	0.287101	7.47377	5.23194	0.000189514	0.00280972	0.140246	WT_GMTP-WT_UT
ENSMUSG00000047821.16	Trim16	-0.386303	3.92379	-5.22978	0.000190202	0.00281683	0.352388	WT_GMTP-WT_UT
ENSMUSG00000027175.10	Tcp11l1	0.559343	3.7749	5.22964	0.000190246	0.00281683	0.373588	WT_GMTP-WT_UT
ENSMUSG00000032356.12	Rasgrf1	5.3978	-5.18597	5.22847	0.000190623	0.00282053	0.410866	WT_GMTP-WT_UT
ENSMUSG00000030986.13	Dhx32	-0.258548	5.03572	-5.21968	0.000193459	0.0028606	0.218228	WT_GMTP-WT_UT
ENSMUSG00000018417.14	Myo1b	-0.600422	2.74952	-5.2191	0.000193647	0.00286149	0.528507	WT_GMTP-WT_UT
ENSMUSG00000036908.17	Unc93b1	0.333529	9.96764	5.21866	0.000193791	0.00286172	0.0914176	WT_GMTP-WT_UT
ENSMUSG00000104088.1	Gm38275	2.8526	-2.42054	5.20987	0.000196675	0.00290239	0.959485	WT_GMTP-WT_UT
ENSMUSG00000031137.17	Fgf13	-1.02396	1.2214	-5.20938	0.000196838	0.00290287	0.766586	WT_GMTP-WT_UT
ENSMUSG00000073412.6	Lst1	0.278728	6.09678	5.20874	0.000197048	0.00290405	0.141077	WT_GMTP-WT_UT
ENSMUSG00000035967.15	Ints6l	-0.348845	5.17399	-5.20408	0.0001986	0.00292455	0.181296	WT_GMTP-WT_UT
ENSMUSG00000004383.18	Large1	-0.264281	6.36548	-5.20378	0.000198701	0.00292455	0.122149	WT_GMTP-WT_UT
ENSMUSG00000017607.9	Tns4	-0.82901	1.58848	-5.19781	0.000200708	0.00295215	0.690751	WT_GMTP-WT_UT
ENSMUSG00000005950.14	P2rx5	0.977095	1.2818	5.19562	0.000201451	0.00296112	0.734143	WT_GMTP-WT_UT
ENSMUSG00000049411.15	Tmem241	0.305996	3.46573	5.19246	0.000202524	0.00297493	0.356791	WT_GMTP-WT_UT
ENSMUSG00000057132.16	Rpgrip1	-1.94842	-0.128276	-5.1896	0.000203503	0.00298734	0.90117	WT_GMTP-WT_UT
ENSMUSG00000022861.17	Dgkg	-0.960231	1.01538	-5.18784	0.000204108	0.00299426	0.759628	WT_GMTP-WT_UT
ENSMUSG00000046949.16	Nqo2	-0.306372	5.37935	-5.18649	0.000204572	0.00299909	0.13751	WT_GMTP-WT_UT
ENSMUSG00000087518.1	Gm13561	3.49116	-7.29107	5.18583	0.0002048	0.00300046	-0.167041	WT_GMTP-WT_UT
ENSMUSG00000028163.17	Nfkb1	0.226088	6.99739	5.18307	0.000205755	0.00301247	0.0661304	WT_GMTP-WT_UT
ENSMUSG00000086424.1	Gm15569	-1.6541	-1.99094	-5.18083	0.000206533	0.00302189	0.945349	WT_GMTP-WT_UT
ENSMUSG00000025025.14	Mxi1	-0.365922	5.03281	-5.18042	0.000206678	0.00302202	0.149729	WT_GMTP-WT_UT
ENSMUSG00000068220.6	Lgals1	-0.324954	8.51816	-5.17488	0.000208618	0.00304839	0.0232755	WT_GMTP-WT_UT
ENSMUSG00000030256.11	Bhlhe41	-0.312723	6.68232	-5.17422	0.00020885	0.00304979	0.0597428	WT_GMTP-WT_UT
ENSMUSG00000029223.12	Uchl1	0.88939	1.10001	5.1725	0.000209455	0.00305662	0.721402	WT_GMTP-WT_UT
ENSMUSG00000005410.6	Mcm5	-0.411904	4.59114	-5.16838	0.000210918	0.00307595	0.166069	WT_GMTP-WT_UT
ENSMUSG00000053436.15	Mapk14	0.263366	7.55854	5.16679	0.000211483	0.00308219	0.0242395	WT_GMTP-WT_UT
ENSMUSG00000021024.14	Psma6	0.285476	6.81418	5.16604	0.000211753	0.0030841	0.0413954	WT_GMTP-WT_UT
ENSMUSG00000008348.9	Ubc	0.309456	7.70941	5.16421	0.000212407	0.0030916	0.0167246	WT_GMTP-WT_UT
ENSMUSG00000016559.14	H3f3b	0.266768	8.80674	5.16368	0.000212599	0.00309238	0.000670313	WT_GMTP-WT_UT
ENSMUSG00000109036.1	2210406H18Rik	0.512929	3.2458	5.16287	0.00021289	0.0030946	0.342632	WT_GMTP-WT_UT
ENSMUSG00000031365.13	Zfp275	-0.354377	5.1766	-5.16243	0.000213048	0.00309489	0.108115	WT_GMTP-WT_UT
ENSMUSG00000035697.14	Arhgap45	-0.273927	8.35005	-5.16159	0.000213348	0.00309685	0.00197913	WT_GMTP-WT_UT
ENSMUSG00000020708.12	Psmc5	0.298729	6.32085	5.16102	0.000213555	0.00309685	0.0487235	WT_GMTP-WT_UT
ENSMUSG00000038495.14	Otud7b	-0.409007	5.17775	-5.1609	0.0002136	0.00309685	0.105349	WT_GMTP-WT_UT
ENSMUSG00000086513.3	9130208D14Rik	1.29193	0.182005	5.15898	0.000214292	0.00310487	0.817646	WT_GMTP-WT_UT
ENSMUSG00000025330.6	Padi4	-0.880255	1.29086	-5.15477	0.000215821	0.003125	0.66298	WT_GMTP-WT_UT
ENSMUSG00000066687.5	Zbtb16	-1.03916	0.812088	-5.15291	0.0002165	0.00313279	0.728499	WT_GMTP-WT_UT
ENSMUSG00000026073.13	Il1r2	-3.26377	-4.2967	-5.1504	0.000217423	0.0031429	0.524121	WT_GMTP-WT_UT
ENSMUSG00000056211.13	R3hdm1	-0.363283	5.98112	-5.15024	0.00021748	0.0031429	0.0433563	WT_GMTP-WT_UT
ENSMUSG00000026390.7	Marco	0.863002	1.84947	5.14921	0.000217859	0.00314624	0.56501	WT_GMTP-WT_UT
ENSMUSG00000032589.14	Bsn	-0.370672	4.97503	-5.14885	0.000217994	0.00314624	0.0986656	WT_GMTP-WT_UT
ENSMUSG00000105556.1	Gm43080	-2.07508	-2.58776	-5.14541	0.000219266	0.00316256	0.847276	WT_GMTP-WT_UT
ENSMUSG00000040502.5	Marchf9	-0.551941	1.83938	-5.14239	0.000220388	0.00317669	0.554897	WT_GMTP-WT_UT
ENSMUSG00000033088.19	Triobp	0.373909	5.5691	5.14019	0.000221209	0.00318646	0.0455467	WT_GMTP-WT_UT
ENSMUSG00000038295.14	Atg9b	-0.822303	1.34795	-5.13909	0.000221619	0.00319032	0.627456	WT_GMTP-WT_UT
ENSMUSG00000020042.15	Btbd11	0.57344	2.63655	5.13674	0.000222504	0.00320099	0.405803	WT_GMTP-WT_UT
ENSMUSG00000045414.7	Dipk2a	-0.347141	5.30397	-5.13282	0.000223985	0.00322022	0.0478844	WT_GMTP-WT_UT
ENSMUSG00000109517.1	Gm44763	-1.99834	-1.7572	-5.13069	0.000224796	0.00322947	0.875462	WT_GMTP-WT_UT
ENSMUSG00000111943.1	Gm47862	-1.27766	-0.758967	-5.13037	0.000224918	0.00322947	0.853369	WT_GMTP-WT_UT
ENSMUSG00000038068.15	Rnf144b	-0.281275	6.91632	-5.12911	0.000225397	0.00323381	-0.0265141	WT_GMTP-WT_UT
ENSMUSG00000024140.10	Epas1	-0.428321	3.28176	-5.12881	0.00022551	0.00323381	0.276881	WT_GMTP-WT_UT
ENSMUSG00000047798.15	Cd300lf	-0.383651	3.51393	-5.12778	0.000225905	0.00323559	0.23587	WT_GMTP-WT_UT
ENSMUSG00000029409.7	U90926	4.90503	-6.70023	5.12736	0.000226067	0.00323559	-0.0788352	WT_GMTP-WT_UT
ENSMUSG00000017499.15	Cdc6	-0.455983	2.315	-5.12735	0.000226069	0.00323559	0.447313	WT_GMTP-WT_UT
ENSMUSG00000002111.8	Spi1	0.325677	8.62937	5.12314	0.000227689	0.00325668	-0.0689903	WT_GMTP-WT_UT
ENSMUSG00000041355.13	Ssr2	0.295094	5.62771	5.12271	0.000227855	0.00325697	0.0116094	WT_GMTP-WT_UT
ENSMUSG00000037235.13	Mxd4	-0.310128	6.98797	-5.1214	0.000228358	0.00326053	-0.0420835	WT_GMTP-WT_UT
ENSMUSG00000026544.6	Dusp23	0.48357	3.22931	5.12131	0.000228396	0.00326053	0.272914	WT_GMTP-WT_UT
ENSMUSG00000033721.16	Vav3	-0.326215	5.92484	-5.11823	0.000229591	0.00327549	-0.0105685	WT_GMTP-WT_UT
ENSMUSG00000035783.9	Acta2	-0.534384	1.93333	-5.11438	0.000231093	0.00329481	0.490778	WT_GMTP-WT_UT
ENSMUSG00000081769.9	Gm12216	0.945642	0.386895	5.11144	0.00023225	0.00330918	0.713436	WT_GMTP-WT_UT
ENSMUSG00000013974.3	Mcemp1	1.56003	0.369363	5.10885	0.00023327	0.0033216	0.711239	WT_GMTP-WT_UT
ENSMUSG00000069792.5	Wfdc17	0.434138	5.22897	5.10811	0.000233563	0.00332366	0.00905467	WT_GMTP-WT_UT
ENSMUSG00000056952.13	Tatdn2	-0.360475	6.3125	-5.10485	0.000234857	0.00333994	-0.0498599	WT_GMTP-WT_UT
ENSMUSG00000004085.14	Map3k20	-0.451412	5.10715	-5.10022	0.000236714	0.0033642	0.00355868	WT_GMTP-WT_UT
ENSMUSG00000097715.2	Gpr137b-ps	-0.274077	7.85208	-5.09753	0.000237793	0.00337739	-0.103409	WT_GMTP-WT_UT
ENSMUSG00000015468.14	Notch4	-1.65975	-0.960262	-5.09481	0.000238896	0.00339089	0.806327	WT_GMTP-WT_UT
ENSMUSG00000087370.3	Tmem170b	0.458577	5.68326	5.09408	0.000239194	0.00339297	-0.041745	WT_GMTP-WT_UT
ENSMUSG00000052102.15	Gnpda1	-0.235162	7.57275	-5.09339	0.000239472	0.00339475	-0.1054	WT_GMTP-WT_UT
ENSMUSG00000037348.15	Paqr7	-0.289734	6.31656	-5.09183	0.000240109	0.00340162	-0.0730026	WT_GMTP-WT_UT
ENSMUSG00000024013.15	Fgd2	0.38201	5.95368	5.09104	0.000240429	0.00340399	-0.0597582	WT_GMTP-WT_UT
ENSMUSG00000060992.9	Copz1	0.289423	6.51569	5.08766	0.000241816	0.00342145	-0.0873478	WT_GMTP-WT_UT
ENSMUSG00000006930.15	Hap1	1.27289	0.079395	5.08268	0.000243872	0.00344836	0.701081	WT_GMTP-WT_UT
ENSMUSG00000026833.18	Olfm1	0.386966	4.82096	5.08068	0.0002447	0.00345788	-0.00910266	WT_GMTP-WT_UT
ENSMUSG00000018585.9	Atox1	0.32363	6.24412	5.0792	0.000245318	0.00346442	-0.0925655	WT_GMTP-WT_UT
ENSMUSG00000046456.14	Tmem150b	-0.380822	3.8119	-5.07711	0.000246189	0.00347452	0.101212	WT_GMTP-WT_UT
ENSMUSG00000034641.2	Cd300ld	-0.265416	7.84369	-5.07666	0.000246379	0.003475	-0.140157	WT_GMTP-WT_UT
ENSMUSG00000031373.4	Car5b	-0.427832	2.75777	-5.07312	0.000247868	0.00349354	0.272873	WT_GMTP-WT_UT
ENSMUSG00000032115.14	Hyou1	0.273154	7.08854	5.07279	0.000248006	0.00349354	-0.130548	WT_GMTP-WT_UT
ENSMUSG00000016933.17	Plcg1	-0.445363	3.93715	-5.06879	0.000249702	0.0035152	0.0684656	WT_GMTP-WT_UT
ENSMUSG00000027968.11	Larp7	-0.247732	4.69074	-5.06668	0.000250596	0.00352557	-0.0221178	WT_GMTP-WT_UT
ENSMUSG00000040414.8	Slc25a28	0.357922	4.36212	5.06566	0.000251035	0.00352951	0.00944801	WT_GMTP-WT_UT
ENSMUSG00000028063.15	Lmna	-0.345059	7.80508	-5.06449	0.000251533	0.0035343	-0.160996	WT_GMTP-WT_UT
ENSMUSG00000028249.15	Sdcbp	0.264834	10.2594	5.06376	0.000251846	0.00353646	-0.181459	WT_GMTP-WT_UT
ENSMUSG00000034593.16	Myo5a	-0.524201	8.863	-5.06199	0.000252607	0.00354492	-0.179289	WT_GMTP-WT_UT
ENSMUSG00000026494.12	Kif26b	-1.27773	0.652672	-5.05712	0.00025471	0.00357219	0.586912	WT_GMTP-WT_UT
ENSMUSG00000003228.9	Grk5	-0.360895	4.47825	-5.05322	0.000256408	0.00359374	-0.0249271	WT_GMTP-WT_UT
ENSMUSG00000009621.18	Vav2	-0.288581	5.96592	-5.05183	0.000257015	0.00359998	-0.129611	WT_GMTP-WT_UT
ENSMUSG00000000028.15	Cdc45	-0.474772	2.43418	-5.04781	0.000258786	0.00362251	0.28736	WT_GMTP-WT_UT
ENSMUSG00000016619.10	Nup50	-0.242901	6.32389	-5.04591	0.000259623	0.00363195	-0.154489	WT_GMTP-WT_UT
ENSMUSG00000063286.7	Gm8995	0.821369	8.63036	5.0449	0.000260071	0.00363595	-0.20735	WT_GMTP-WT_UT
ENSMUSG00000079505.2	Gm11131	0.664718	0.810261	5.04345	0.000260712	0.00364066	0.541985	WT_GMTP-WT_UT
ENSMUSG00000069793.12	Slfn9	0.672693	5.73868	5.04323	0.000260813	0.00364066	-0.134327	WT_GMTP-WT_UT
ENSMUSG00000069662.5	Marcks	0.301874	8.79614	5.04304	0.000260898	0.00364066	-0.212272	WT_GMTP-WT_UT
ENSMUSG00000038539.15	Atf5	0.476849	4.73406	5.03965	0.00026241	0.00365846	-0.0739569	WT_GMTP-WT_UT
ENSMUSG00000075700.9	Selenot	0.245889	7.96554	5.03944	0.000262501	0.00365846	-0.208125	WT_GMTP-WT_UT
ENSMUSG00000037999.13	Arap2	-0.775715	3.26872	-5.03864	0.000262861	0.00366118	0.120896	WT_GMTP-WT_UT
ENSMUSG00000049327.17	Kmt5a	0.306602	6.28655	5.03732	0.000263453	0.00366714	-0.168317	WT_GMTP-WT_UT
ENSMUSG00000091415.5	Ak9	-1.6879	-2.79572	-5.03406	0.000264923	0.00368531	0.659484	WT_GMTP-WT_UT
ENSMUSG00000028088.14	Fmo5	-0.44233	4.0671	-5.03218	0.000265775	0.00369485	-0.0135411	WT_GMTP-WT_UT
ENSMUSG00000030433.15	Sbk2	-0.956836	1.27594	-5.03168	0.000266003	0.00369571	0.453523	WT_GMTP-WT_UT
ENSMUSG00000004709.14	Cd244a	0.546217	1.91496	5.02699	0.00026814	0.00372146	0.342074	WT_GMTP-WT_UT
ENSMUSG00000042105.18	Inpp5f	-0.323821	5.31528	-5.02688	0.000268189	0.00372146	-0.139885	WT_GMTP-WT_UT
ENSMUSG00000030306.14	Tmtc1	-2.05139	-3.22681	-5.02563	0.000268762	0.00372497	0.585157	WT_GMTP-WT_UT
ENSMUSG00000002055.9	Spag5	-0.592232	2.53364	-5.02532	0.000268905	0.00372497	0.229972	WT_GMTP-WT_UT
ENSMUSG00000024404.7	Riok3	0.250387	7.05432	5.02524	0.000268943	0.00372497	-0.213912	WT_GMTP-WT_UT
ENSMUSG00000030220.13	Arhgdib	0.270496	8.02744	5.02346	0.00026976	0.00373397	-0.23751	WT_GMTP-WT_UT
ENSMUSG00000055407.14	Map6	-0.501049	3.27185	-5.02202	0.000270427	0.00374088	0.0910557	WT_GMTP-WT_UT
ENSMUSG00000101223.6	4930568A12Rik	1.20528	-1.0483	5.0201	0.000271312	0.0037508	0.688832	WT_GMTP-WT_UT
ENSMUSG00000038390.11	Gpr162	0.416632	7.02218	5.01816	0.000272216	0.00376097	-0.225647	WT_GMTP-WT_UT
ENSMUSG00000041293.5	Adgrf1	1.65762	-1.05347	5.01699	0.000272762	0.00376617	0.683983	WT_GMTP-WT_UT
ENSMUSG00000021636.15	Marveld2	-0.781672	0.548809	-5.01499	0.000273694	0.0037767	0.528843	WT_GMTP-WT_UT
ENSMUSG00000040824.3	Snrpd2	0.34179	4.91888	5.01032	0.000275888	0.00380462	-0.141402	WT_GMTP-WT_UT
ENSMUSG00000032020.15	Ubash3b	-0.291791	5.94778	-5.00884	0.000276585	0.00381189	-0.205059	WT_GMTP-WT_UT
ENSMUSG00000045287.6	Rtn4rl1	-1.01918	0.247879	-5.00819	0.000276892	0.00381376	0.555471	WT_GMTP-WT_UT
ENSMUSG00000109244.1	Gm44751	0.992283	-0.0413835	5.00679	0.000277557	0.00382018	0.586516	WT_GMTP-WT_UT
ENSMUSG00000020573.17	Pik3cg	-0.339971	6.2507	-5.00649	0.000277701	0.00382018	-0.221659	WT_GMTP-WT_UT
ENSMUSG00000025366.8	Esyt1	-0.279942	9.67837	-5.00579	0.000278034	0.00382241	-0.283664	WT_GMTP-WT_UT
ENSMUSG00000026688.5	Mgst3	-0.346398	4.28876	-5.00428	0.000278753	0.00382994	-0.090537	WT_GMTP-WT_UT
ENSMUSG00000045573.9	Penk	-0.730454	0.986074	-4.9993	0.000281138	0.00386033	0.440977	WT_GMTP-WT_UT
ENSMUSG00000037852.8	Cpe	-0.397945	3.81848	-4.99653	0.000282474	0.00387401	-0.042029	WT_GMTP-WT_UT
ENSMUSG00000015542.17	Nat9	-0.376605	4.65453	-4.99651	0.000282482	0.00387401	-0.142972	WT_GMTP-WT_UT
ENSMUSG00000020357.3	Flt4	1.6079	-0.653341	4.99555	0.000282947	0.003878	0.624376	WT_GMTP-WT_UT
ENSMUSG00000092274.3	Neat1	-0.487276	8.09318	-4.99507	0.00028318	0.00387881	-0.288991	WT_GMTP-WT_UT
ENSMUSG00000036641.9	Ccdc148	-0.801725	2.10657	-4.9939	0.000283748	0.00388422	0.251274	WT_GMTP-WT_UT
ENSMUSG00000037474.13	Dtl	-0.59904	2.11623	-4.99087	0.000285221	0.00390198	0.244283	WT_GMTP-WT_UT
ENSMUSG00000039765.15	Cc2d2a	-0.744152	0.953983	-4.98908	0.000286097	0.00391157	0.428014	WT_GMTP-WT_UT
ENSMUSG00000078994.9	Zfp429	0.460557	3.03898	4.98854	0.000286362	0.00391279	0.0733013	WT_GMTP-WT_UT
ENSMUSG00000003948.17	Mmd	-0.436794	4.58119	-4.97755	0.000291807	0.00398476	-0.169719	WT_GMTP-WT_UT
ENSMUSG00000022400.9	Rbx1	0.301139	6.01121	4.97623	0.000292466	0.00398859	-0.265779	WT_GMTP-WT_UT
ENSMUSG00000000881.12	Dlg3	-0.480217	3.88458	-4.97614	0.000292515	0.00398859	-0.0878716	WT_GMTP-WT_UT
ENSMUSG00000020250.10	Txnrd1	0.293805	7.27588	4.97592	0.000292624	0.00398859	-0.307158	WT_GMTP-WT_UT
ENSMUSG00000021384.14	Susd3	-0.32241	5.66287	-4.97351	0.000293836	0.00400266	-0.254379	WT_GMTP-WT_UT
ENSMUSG00000029174.18	Tbc1d1	-0.255817	5.86166	-4.97291	0.00029414	0.00400435	-0.265122	WT_GMTP-WT_UT
ENSMUSG00000024300.17	Myo1f	-0.233749	10.2847	-4.97245	0.00029437	0.00400504	-0.343676	WT_GMTP-WT_UT
ENSMUSG00000078813.3	Leng1	0.336046	3.63656	4.97141	0.000294895	0.00400974	-0.0590946	WT_GMTP-WT_UT
ENSMUSG00000083257.1	Gm15568	3.99313	-6.88975	4.9707	0.000295257	0.00401222	-0.28534	WT_GMTP-WT_UT
ENSMUSG00000003423.15	Pih1d1	0.346497	4.5248	4.96904	0.000296095	0.00402116	-0.179085	WT_GMTP-WT_UT
ENSMUSG00000036890.13	Gtdc1	0.465289	3.34635	4.96051	0.000300463	0.004078	-0.0304072	WT_GMTP-WT_UT
ENSMUSG00000040268.17	Plekha1	-0.253765	6.88162	-4.95825	0.000301632	0.00409138	-0.328356	WT_GMTP-WT_UT
ENSMUSG00000027344.14	Fsip1	-1.64695	-2.41647	-4.95767	0.00030193	0.00409293	0.579514	WT_GMTP-WT_UT
ENSMUSG00000061132.13	Blnk	-0.262597	7.45049	-4.95625	0.000302666	0.00409971	-0.34624	WT_GMTP-WT_UT
ENSMUSG00000028751.13	Pla2g2e	-1.29104	0.0362934	-4.956	0.000302798	0.00409971	0.491851	WT_GMTP-WT_UT
ENSMUSG00000026768.10	Itga8	-1.36934	-1.01456	-4.95404	0.000303818	0.00411103	0.579039	WT_GMTP-WT_UT
ENSMUSG00000015854.7	Cd5l	-0.255556	7.60434	-4.95292	0.000304402	0.00411463	-0.355447	WT_GMTP-WT_UT
ENSMUSG00000022965.8	Ifngr2	0.245091	7.63568	4.95274	0.000304496	0.00411463	-0.356401	WT_GMTP-WT_UT
ENSMUSG00000097091.1	4930526L06Rik	1.35313	-2.02302	4.95247	0.000304637	0.00411463	0.590199	WT_GMTP-WT_UT
ENSMUSG00000067847.13	Romo1	0.423922	4.08513	4.94807	0.000306951	0.00414337	-0.165103	WT_GMTP-WT_UT
ENSMUSG00000029175.17	Slc35f6	0.270445	6.99253	4.94771	0.00030714	0.00414342	-0.350276	WT_GMTP-WT_UT
ENSMUSG00000029477.14	Morn3	-2.90154	-5.99338	-4.94689	0.000307574	0.00414677	-0.102538	WT_GMTP-WT_UT
ENSMUSG00000040037.13	Negr1	3.34627	-3.46444	4.94619	0.000307944	0.00414925	0.429661	WT_GMTP-WT_UT
ENSMUSG00000010755.17	Cars	0.253842	5.41167	4.94488	0.000308637	0.00415607	-0.291566	WT_GMTP-WT_UT
ENSMUSG00000074794.10	Arrdc3	-0.510302	5.96413	-4.94422	0.00030899	0.00415831	-0.32079	WT_GMTP-WT_UT
ENSMUSG00000031627.9	Irf2	0.236889	6.79584	4.94021	0.000311126	0.00418454	-0.358058	WT_GMTP-WT_UT
ENSMUSG00000027570.15	Col9a3	1.75249	-2.01314	4.93311	0.000314946	0.00423337	0.560098	WT_GMTP-WT_UT
ENSMUSG00000032712.16	Resf1	0.34933	6.55235	4.92944	0.000316942	0.00425763	-0.369648	WT_GMTP-WT_UT
ENSMUSG00000027566.15	Psma7	0.367773	6.37944	4.92878	0.0003173	0.00425988	-0.364827	WT_GMTP-WT_UT
ENSMUSG00000031133.12	Arhgef6	-0.355007	7.31059	-4.92746	0.000318025	0.00426704	-0.39444	WT_GMTP-WT_UT
ENSMUSG00000021983.16	Atp8a2	1.0372	-0.818236	4.92411	0.000319864	0.00428914	0.517685	WT_GMTP-WT_UT
ENSMUSG00000055805.15	Fmnl1	-0.24129	7.4768	-4.92374	0.000320063	0.00428923	-0.404846	WT_GMTP-WT_UT
ENSMUSG00000025558.19	Dock9	-0.880435	0.537522	-4.91966	0.000322323	0.00431692	0.366819	WT_GMTP-WT_UT
ENSMUSG00000001827.12	Folr1	-1.25	0.00101236	-4.91895	0.000322714	0.00431956	0.432936	WT_GMTP-WT_UT
ENSMUSG00000037788.14	Vopp1	-0.290412	6.11531	-4.91754	0.0003235	0.00432596	-0.374867	WT_GMTP-WT_UT
ENSMUSG00000072720.9	Myo18b	-1.25476	-0.147847	-4.9174	0.00032358	0.00432596	0.446865	WT_GMTP-WT_UT
ENSMUSG00000038412.8	Higd1a	0.358448	3.80539	4.91594	0.000324393	0.00433425	-0.183187	WT_GMTP-WT_UT
ENSMUSG00000042406.8	Atf4	0.306947	6.72205	4.91513	0.000324844	0.00433538	-0.400631	WT_GMTP-WT_UT
ENSMUSG00000048696.11	Mex3d	0.271804	3.78433	4.91505	0.00032489	0.00433538	-0.18167	WT_GMTP-WT_UT
ENSMUSG00000089810.1	Gm16536	0.42008	2.8711	4.91447	0.000325216	0.00433538	-0.0272415	WT_GMTP-WT_UT
ENSMUSG00000083161.2	Gm11427	0.661345	2.40739	4.9144	0.000325255	0.00433538	0.0577574	WT_GMTP-WT_UT
ENSMUSG00000083307.1	AA414768	-0.400427	2.8865	-4.91335	0.000325843	0.00434062	-0.0319927	WT_GMTP-WT_UT
ENSMUSG00000024472.9	Dcp2	0.503876	6.40995	4.91189	0.000326665	0.00434897	-0.396089	WT_GMTP-WT_UT
ENSMUSG00000039568.6	Ubald1	-0.367407	6.30661	-4.9048	0.000330679	0.00439978	-0.40507	WT_GMTP-WT_UT
ENSMUSG00000050439.7	Enthd1	-1.9495	-2.45796	-4.90409	0.000331086	0.00440257	0.494697	WT_GMTP-WT_UT
ENSMUSG00000031673.6	Cdh11	-0.591721	1.03529	-4.90311	0.000331646	0.0044074	0.267101	WT_GMTP-WT_UT
ENSMUSG00000034765.6	Dusp5	-1.06569	0.134408	-4.90061	0.000333079	0.00442381	0.38596	WT_GMTP-WT_UT
ENSMUSG00000022816.11	Fstl1	-0.380096	2.9519	-4.89652	0.000335434	0.00445244	-0.0736969	WT_GMTP-WT_UT
ENSMUSG00000067591.12	Klra3	-0.637131	2.63068	-4.89361	0.000337126	0.00447223	-0.0200876	WT_GMTP-WT_UT
ENSMUSG00000022246.14	Rai14	-0.376649	4.50244	-4.89164	0.000338272	0.00448361	-0.314634	WT_GMTP-WT_UT
ENSMUSG00000031349.4	Nsdhl	0.39925	4.1648	4.89145	0.000338385	0.00448361	-0.276321	WT_GMTP-WT_UT
ENSMUSG00000024621.16	Csf1r	0.245706	11.4923	4.89073	0.000338805	0.0044865	-0.485298	WT_GMTP-WT_UT
ENSMUSG00000035455.12	Fignl1	-0.560689	2.79422	-4.88637	0.000341362	0.00451768	-0.0629925	WT_GMTP-WT_UT
ENSMUSG00000047534.17	Mis18bp1	-0.484161	3.20234	-4.88558	0.000341828	0.00451945	-0.138238	WT_GMTP-WT_UT
ENSMUSG00000022822.16	Abcc5	0.346939	7.02815	4.88546	0.000341901	0.00451945	-0.462514	WT_GMTP-WT_UT
ENSMUSG00000040852.6	Plekhh2	-1.95083	-1.00362	-4.88428	0.000342598	0.00452599	0.463458	WT_GMTP-WT_UT
ENSMUSG00000018381.15	Abi3	0.362207	3.99512	4.87713	0.000346856	0.00457952	-0.279385	WT_GMTP-WT_UT
ENSMUSG00000031948.14	Kars	0.241538	6.1932	4.87676	0.000347076	0.00457972	-0.450896	WT_GMTP-WT_UT
ENSMUSG00000039959.13	Hip1	-0.533641	7.93073	-4.87627	0.000347371	0.00458091	-0.498584	WT_GMTP-WT_UT
ENSMUSG00000023952.13	Gtpbp2	0.249046	6.78894	4.87355	0.000349005	0.00459974	-0.47711	WT_GMTP-WT_UT
ENSMUSG00000020163.12	Uqcr11	0.36883	4.99097	4.87232	0.00034975	0.00460683	-0.39305	WT_GMTP-WT_UT
ENSMUSG00000030199.16	Etv6	0.362897	5.54527	4.86985	0.000351244	0.00462373	-0.433171	WT_GMTP-WT_UT
ENSMUSG00000034906.15	Ncaph	-0.468327	3.18377	-4.86952	0.000351448	0.00462373	-0.163495	WT_GMTP-WT_UT
ENSMUSG00000034993.7	Vat1	-0.309967	9.78272	-4.86579	0.000353723	0.00465093	-0.534089	WT_GMTP-WT_UT
ENSMUSG00000030630.16	Fah	-0.618167	1.60321	-4.86415	0.000354725	0.00466135	0.109298	WT_GMTP-WT_UT
ENSMUSG00000090075.1	Gm16251	-3.99486	-5.42461	-4.86217	0.000355945	0.00467463	-0.0746658	WT_GMTP-WT_UT
ENSMUSG00000042350.13	Arel1	0.418051	6.35816	4.85675	0.000359295	0.00471585	-0.493045	WT_GMTP-WT_UT
ENSMUSG00000047409.13	Ctdspl	-0.41125	2.76003	-4.85626	0.000359603	0.00471712	-0.110131	WT_GMTP-WT_UT
ENSMUSG00000018800.14	Abca5	-0.816549	1.84225	-4.85456	0.000360662	0.00472823	0.0521785	WT_GMTP-WT_UT
ENSMUSG00000046318.16	Ccbe1	-0.669824	1.96477	-4.8513	0.0003627	0.00475215	0.0252596	WT_GMTP-WT_UT
ENSMUSG00000050103.18	Agmo	-0.656668	1.22031	-4.84992	0.000363566	0.0047603	0.146031	WT_GMTP-WT_UT
ENSMUSG00000021846.9	Peli2	-0.391848	5.22684	-4.84949	0.000363839	0.0047603	-0.4507	WT_GMTP-WT_UT
ENSMUSG00000024235.11	Map3k8	0.254406	5.18191	4.8493	0.000363961	0.0047603	-0.447994	WT_GMTP-WT_UT
ENSMUSG00000020185.16	E2f7	-0.857037	0.890158	-4.8452	0.00036655	0.00479134	0.187846	WT_GMTP-WT_UT
ENSMUSG00000040018.9	Cox15	0.280288	5.47309	4.8412	0.000369104	0.00481891	-0.480636	WT_GMTP-WT_UT
ENSMUSG00000037965.14	Zc3h7a	0.261866	6.02181	4.84101	0.000369224	0.00481891	-0.508042	WT_GMTP-WT_UT
ENSMUSG00000030122.12	Ptms	0.381723	9.51534	4.84088	0.000369307	0.00481891	-0.577999	WT_GMTP-WT_UT
ENSMUSG00000021178.9	Psmc1	0.285757	6.91753	4.84036	0.00036964	0.00482044	-0.540426	WT_GMTP-WT_UT
ENSMUSG00000018925.3	Heatr9	2.57961	-1.98586	4.8389	0.000370576	0.00482982	0.411891	WT_GMTP-WT_UT
ENSMUSG00000007817.15	Zmiz1	-0.429971	8.13964	-4.8385	0.000370832	0.00483033	-0.569719	WT_GMTP-WT_UT
ENSMUSG00000031266.7	Gla	-0.211066	8.46194	-4.83789	0.000371224	0.00483263	-0.575154	WT_GMTP-WT_UT
ENSMUSG00000031827.13	Cotl1	-0.319098	9.3318	-4.83741	0.000371535	0.00483385	-0.583399	WT_GMTP-WT_UT
ENSMUSG00000028893.8	Sesn2	0.295947	4.77465	4.83695	0.000371832	0.0048349	-0.438896	WT_GMTP-WT_UT
ENSMUSG00000070997.4	1700055D18Rik	1.5839	-1.73764	4.83608	0.000372393	0.00483937	0.408595	WT_GMTP-WT_UT
ENSMUSG00000030761.16	Myo7a	-0.413762	5.1942	-4.83369	0.000373936	0.0048566	-0.47685	WT_GMTP-WT_UT
ENSMUSG00000026473.16	Glul	-0.241391	8.34219	-4.83165	0.00037526	0.00487096	-0.584859	WT_GMTP-WT_UT
ENSMUSG00000030789.9	Itgax	-0.32852	8.25829	-4.83067	0.000375899	0.00487642	-0.585525	WT_GMTP-WT_UT
ENSMUSG00000031714.9	Gab1	0.567031	4.06144	4.83002	0.000376326	0.00487911	-0.372648	WT_GMTP-WT_UT
ENSMUSG00000034714.9	Ttyh2	-0.275281	7.46753	-4.82761	0.000377896	0.00489663	-0.577037	WT_GMTP-WT_UT
ENSMUSG00000050071.8	Bex1	-0.639682	1.89803	-4.82383	0.000380382	0.00492598	-0.0116745	WT_GMTP-WT_UT
ENSMUSG00000036249.16	Rbm43	0.241056	5.30677	4.81909	0.000383528	0.00496384	-0.510332	WT_GMTP-WT_UT
ENSMUSG00000070934.6	Rraga	-0.212014	6.25754	-4.81472	0.000386444	0.00499868	-0.564826	WT_GMTP-WT_UT
ENSMUSG00000031431.13	Tsc22d3	-0.261803	6.7728	-4.81285	0.000387701	0.00501203	-0.5857	WT_GMTP-WT_UT
ENSMUSG00000000708.14	Kat2b	0.313483	5.72792	4.81248	0.00038795	0.00501235	-0.54577	WT_GMTP-WT_UT
ENSMUSG00000049130.6	C5ar1	-0.226897	7.71349	-4.81132	0.000388732	0.00501955	-0.611397	WT_GMTP-WT_UT
ENSMUSG00000025810.9	Nrp1	-0.404202	8.37923	-4.80628	0.000392153	0.00506016	-0.631011	WT_GMTP-WT_UT
ENSMUSG00000060803.6	Gstp1	0.466376	4.22597	4.80602	0.00039233	0.00506016	-0.436676	WT_GMTP-WT_UT
ENSMUSG00000036098.15	Myrf	-0.5162	2.90426	-4.80071	0.000395963	0.00510351	-0.235622	WT_GMTP-WT_UT
ENSMUSG00000011837.4	Snapc2	0.338281	3.78701	4.80044	0.000396149	0.00510351	-0.386911	WT_GMTP-WT_UT
ENSMUSG00000050394.14	Armcx6	-0.57765	2.45234	-4.79876	0.000397308	0.00511254	-0.155474	WT_GMTP-WT_UT
ENSMUSG00000009394.13	Syn2	-3.71427	-5.47125	-4.79876	0.000397308	0.00511254	-0.160619	WT_GMTP-WT_UT
ENSMUSG00000034893.9	Cog3	-0.237489	5.51837	-4.79714	0.00039843	0.00512291	-0.562323	WT_GMTP-WT_UT
ENSMUSG00000107194.1	Gm43173	-3.83443	-6.6295	-4.79693	0.000398574	0.00512291	-0.411237	WT_GMTP-WT_UT
ENSMUSG00000001700.10	Gramd3	-0.368311	4.38787	-4.79598	0.000399237	0.00512848	-0.473852	WT_GMTP-WT_UT
ENSMUSG00000023965.13	Fbxl17	-0.291724	4.98314	-4.79508	0.000399862	0.00513356	-0.531122	WT_GMTP-WT_UT
ENSMUSG00000027330.16	Cdc25b	-0.312495	4.83881	-4.79474	0.000400093	0.00513357	-0.520154	WT_GMTP-WT_UT
ENSMUSG00000002058.13	Unc119	-0.287116	4.66336	-4.79406	0.000400571	0.00513674	-0.505574	WT_GMTP-WT_UT
ENSMUSG00000024781.16	Lipa	-0.231593	11.1825	-4.79182	0.00040213	0.00515378	-0.664904	WT_GMTP-WT_UT
ENSMUSG00000040260.8	Daam2	0.602753	0.512983	4.78959	0.000403693	0.00517084	0.145183	WT_GMTP-WT_UT
ENSMUSG00000029108.14	Pcdh7	-0.37663	6.11927	-4.78905	0.000404075	0.00517276	-0.605653	WT_GMTP-WT_UT
ENSMUSG00000029993.16	Nfu1	0.280782	5.18931	4.78871	0.000404311	0.00517282	-0.557399	WT_GMTP-WT_UT
ENSMUSG00000003153.10	Slc2a3	-0.490928	2.71235	-4.78767	0.000405047	0.00517926	-0.22348	WT_GMTP-WT_UT
ENSMUSG00000031506.11	Ptpn7	-0.215065	6.68045	-4.7854	0.000406652	0.00519681	-0.63229	WT_GMTP-WT_UT
ENSMUSG00000042500.11	Ago4	-0.349091	5.3402	-4.78018	0.000410363	0.00524123	-0.58244	WT_GMTP-WT_UT
ENSMUSG00000042507.15	Elmsan1	0.285873	6.05153	4.77884	0.000411316	0.00524661	-0.621227	WT_GMTP-WT_UT
ENSMUSG00000113268.1	4930477G07Rik	1.94461	-3.34803	4.77882	0.00041133	0.00524661	0.210544	WT_GMTP-WT_UT
ENSMUSG00000058135.12	Gstm1	-0.339491	6.88426	-4.77814	0.000411817	0.00524661	-0.651494	WT_GMTP-WT_UT
ENSMUSG00000044864.16	Ankrd50	0.418473	6.08619	4.77802	0.000411902	0.00524661	-0.624166	WT_GMTP-WT_UT
ENSMUSG00000009614.16	Sardh	-1.02216	0.525997	-4.77794	0.00041196	0.00524661	0.123127	WT_GMTP-WT_UT
ENSMUSG00000021997.4	Lrrc63	1.62779	-2.07225	4.77708	0.000412581	0.00525153	0.312236	WT_GMTP-WT_UT
ENSMUSG00000036362.2	P2ry13	0.492877	2.96456	4.77458	0.000414377	0.00527124	-0.293387	WT_GMTP-WT_UT
ENSMUSG00000085913.2	Gm15601	0.849076	-0.474014	4.77427	0.000414603	0.00527124	0.23742	WT_GMTP-WT_UT
ENSMUSG00000041138.16	Nme8	4.4233	-6.67977	4.77174	0.000416433	0.0052915	-0.449608	WT_GMTP-WT_UT
ENSMUSG00000048174.2	Tmem81	-0.44145	2.82877	-4.76638	0.000420338	0.00533808	-0.283204	WT_GMTP-WT_UT
ENSMUSG00000039084.8	Chad	-2.14621	-3.44078	-4.76513	0.000421258	0.00534671	0.176064	WT_GMTP-WT_UT
ENSMUSG00000039529.9	Atp8b1	-2.60622	-2.96521	-4.76101	0.000424291	0.00537951	0.233962	WT_GMTP-WT_UT
ENSMUSG00000030474.9	Siglece	0.931597	1.69485	4.76075	0.000424488	0.00537951	-0.0885676	WT_GMTP-WT_UT
ENSMUSG00000021458.17	Aopep	-0.353135	5.89706	-4.76064	0.000424565	0.00537951	-0.647322	WT_GMTP-WT_UT
ENSMUSG00000087206.1	Gm16175	3.58981	-6.37071	4.76006	0.000424995	0.00538191	-0.396142	WT_GMTP-WT_UT
ENSMUSG00000041845.11	Rhod	-0.577662	1.37691	-4.75547	0.000428409	0.00542206	-0.0450116	WT_GMTP-WT_UT
ENSMUSG00000081099.2	Gm5270	-3.3125	-6.85267	-4.75269	0.00043049	0.00544382	-0.507208	WT_GMTP-WT_UT
ENSMUSG00000047824.13	Pygo2	0.238713	5.5147	4.75253	0.000430616	0.00544382	-0.642571	WT_GMTP-WT_UT
ENSMUSG00000051008.5	4930412M03Rik	-2.00861	-3.26298	-4.7455	0.000435931	0.00550789	0.17444	WT_GMTP-WT_UT
ENSMUSG00000044345.9	Marveld1	-0.435455	4.57063	-4.7433	0.000437605	0.00552591	-0.588165	WT_GMTP-WT_UT
ENSMUSG00000043162.7	Pyurf	-0.52885	2.29768	-4.7414	0.000439059	0.00553833	-0.22934	WT_GMTP-WT_UT
ENSMUSG00000020876.14	Snx11	0.26621	4.72923	4.74113	0.000439262	0.00553833	-0.607162	WT_GMTP-WT_UT
ENSMUSG00000035165.14	Kcne3	-1.39061	-0.643967	-4.74104	0.000439333	0.00553833	0.196884	WT_GMTP-WT_UT
ENSMUSG00000026110.15	Mgat4a	0.325447	5.26404	4.73987	0.000440231	0.00554651	-0.650461	WT_GMTP-WT_UT
ENSMUSG00000061411.12	Nol4l	-0.30072	4.09453	-4.73909	0.000440833	0.00555096	-0.5406	WT_GMTP-WT_UT
ENSMUSG00000020493.8	Prr11	-0.533605	2.69639	-4.73639	0.000442916	0.0055718	-0.312227	WT_GMTP-WT_UT
ENSMUSG00000019359.14	Gdpd2	3.39074	-4.85688	4.7363	0.000442987	0.0055718	-0.116595	WT_GMTP-WT_UT
ENSMUSG00000024421.16	Lama3	-1.79225	-0.21769	-4.73573	0.000443427	0.00557419	0.144645	WT_GMTP-WT_UT
ENSMUSG00000006273.14	Atp6v1b2	-0.211226	9.82048	-4.73478	0.000444163	0.0055803	-0.770333	WT_GMTP-WT_UT
ENSMUSG00000035392.17	Dennd1a	0.275015	6.69719	4.73297	0.000445566	0.00559466	-0.727522	WT_GMTP-WT_UT
ENSMUSG00000017428.16	Psmd11	0.246345	5.78335	4.73266	0.000445807	0.00559466	-0.692454	WT_GMTP-WT_UT
ENSMUSG00000000275.16	Trim25	0.236354	8.53996	4.73205	0.000446283	0.00559747	-0.767008	WT_GMTP-WT_UT
ENSMUSG00000001036.17	Epn2	-0.777166	1.38429	-4.73094	0.00044715	0.0056052	-0.0895653	WT_GMTP-WT_UT
ENSMUSG00000015671.11	Psma2	0.315742	6.53153	4.72774	0.000449662	0.00563352	-0.73164	WT_GMTP-WT_UT
ENSMUSG00000005045.16	Chd5	-1.20128	0.598683	-4.72639	0.00045072	0.00564362	0.0229192	WT_GMTP-WT_UT
ENSMUSG00000027624.20	Epb41l1	-0.361957	7.1614	-4.71481	0.000459938	0.00575581	-0.773486	WT_GMTP-WT_UT
ENSMUSG00000063236.6	1110038F14Rik	0.514504	3.96579	4.70934	0.000464366	0.00580795	-0.576814	WT_GMTP-WT_UT
ENSMUSG00000022090.10	Pdlim2	-0.348645	4.45372	-4.70459	0.000468236	0.00585308	-0.645689	WT_GMTP-WT_UT
ENSMUSG00000023951.18	Vegfa	-0.325337	3.65091	-4.70382	0.000468867	0.00585602	-0.540035	WT_GMTP-WT_UT
ENSMUSG00000074419.11	Gm15448	-0.537317	2.8189	-4.70367	0.000468996	0.00585602	-0.393828	WT_GMTP-WT_UT
ENSMUSG00000022102.13	Dok2	-0.278992	6.01123	-4.70258	0.000469887	0.00586224	-0.757331	WT_GMTP-WT_UT
ENSMUSG00000018449.12	Rpain	0.319901	4.03879	4.70242	0.00047002	0.00586224	-0.599199	WT_GMTP-WT_UT
ENSMUSG00000029270.10	Dipk1a	-0.319927	4.9113	-4.69927	0.000472621	0.00589139	-0.698336	WT_GMTP-WT_UT
ENSMUSG00000034416.18	Pkd1l2	-0.633681	0.895531	-4.69833	0.000473398	0.00589623	-0.0702267	WT_GMTP-WT_UT
ENSMUSG00000036777.8	Anln	-0.630162	3.28946	-4.69816	0.000473538	0.00589623	-0.489441	WT_GMTP-WT_UT
ENSMUSG00000038615.17	Nfe2l1	0.211639	7.9458	4.69567	0.000475607	0.0059187	-0.824632	WT_GMTP-WT_UT
ENSMUSG00000028648.13	Ndufs5	0.281478	4.7715	4.69241	0.000478338	0.00594832	-0.699178	WT_GMTP-WT_UT
ENSMUSG00000097694.8	G730013B05Rik	-1.28883	-0.724913	-4.69211	0.000478589	0.00594832	0.12109	WT_GMTP-WT_UT
ENSMUSG00000045795.10	Whamm	0.378568	3.8958	4.69187	0.000478788	0.00594832	-0.598545	WT_GMTP-WT_UT
ENSMUSG00000041143.16	Tmco4	0.303901	4.89175	4.69112	0.000479419	0.00595285	-0.711522	WT_GMTP-WT_UT
ENSMUSG00000043740.15	B430306N03Rik	-0.225386	5.65688	-4.68764	0.000482348	0.00598517	-0.767725	WT_GMTP-WT_UT
ENSMUSG00000103638.1	Gm38327	2.01551	-3.85737	4.68739	0.000482558	0.00598517	-0.00726497	WT_GMTP-WT_UT
ENSMUSG00000021703.9	Serinc5	-0.294993	4.82906	-4.68556	0.000484111	0.00599869	-0.716531	WT_GMTP-WT_UT
ENSMUSG00000020900.15	Myh10	-0.716423	1.62824	-4.68547	0.000484186	0.00599869	-0.210909	WT_GMTP-WT_UT
ENSMUSG00000087107.8	AI662270	0.353847	4.71908	4.68297	0.000486315	0.00601841	-0.711402	WT_GMTP-WT_UT
ENSMUSG00000032640.10	Chsy1	0.424778	3.81853	4.68297	0.000486317	0.00601841	-0.603171	WT_GMTP-WT_UT
ENSMUSG00000041439.15	Mfsd6	-0.333084	6.45141	-4.68239	0.000486808	0.00602114	-0.811037	WT_GMTP-WT_UT
ENSMUSG00000036432.8	Siah2	0.544363	3.513	4.68139	0.000487664	0.00602644	-0.558295	WT_GMTP-WT_UT
ENSMUSG00000003528.15	Slc25a1	0.266136	6.1144	4.68126	0.000487776	0.00602644	-0.8004	WT_GMTP-WT_UT
ENSMUSG00000078453.3	Abracl	0.393437	5.07339	4.68088	0.0004881	0.0060271	-0.744045	WT_GMTP-WT_UT
ENSMUSG00000019794.13	Katna1	0.26735	4.86579	4.6787	0.000489971	0.00604686	-0.731929	WT_GMTP-WT_UT
ENSMUSG00000004947.15	Dtx2	0.368103	3.84083	4.67773	0.000490802	0.00605376	-0.615963	WT_GMTP-WT_UT
ENSMUSG00000020902.12	Ntn1	-0.901	1.15298	-4.67506	0.000493105	0.00607565	-0.151226	WT_GMTP-WT_UT
ENSMUSG00000027806.9	Tsc22d2	0.332753	5.09285	4.67504	0.00049312	0.00607565	-0.756007	WT_GMTP-WT_UT
ENSMUSG00000015937.15	Macroh2a1	0.268416	6.62549	4.67153	0.00049617	0.00610984	-0.836598	WT_GMTP-WT_UT
ENSMUSG00000033871.14	Ppargc1b	0.624965	2.45495	4.66689	0.000500228	0.00615642	-0.391782	WT_GMTP-WT_UT
ENSMUSG00000075031.4	H2bc3	4.07319	-5.80553	4.66474	0.000502117	0.00617626	-0.389443	WT_GMTP-WT_UT
ENSMUSG00000039062.15	Anpep	-0.274375	10.908	-4.66395	0.000502815	0.00618144	-0.897722	WT_GMTP-WT_UT
ENSMUSG00000005220.10	Corin	-1.99686	-2.80293	-4.66308	0.00050358	0.00618744	0.100113	WT_GMTP-WT_UT
ENSMUSG00000020017.14	Hal	-1.12343	-0.0576448	-4.66131	0.000505152	0.00620275	-0.00251803	WT_GMTP-WT_UT
ENSMUSG00000040584.8	Abcb1a	-0.63722	2.46754	-4.66105	0.000505383	0.00620275	-0.404611	WT_GMTP-WT_UT
ENSMUSG00000006526.13	Stimate	0.373745	3.26027	4.65918	0.000507042	0.00621642	-0.554568	WT_GMTP-WT_UT
ENSMUSG00000030557.17	Mef2a	-0.370241	7.46089	-4.65889	0.000507304	0.00621642	-0.882061	WT_GMTP-WT_UT
ENSMUSG00000059248.13	Septin9	-0.227576	7.79196	-4.65886	0.000507332	0.00621642	-0.888818	WT_GMTP-WT_UT
ENSMUSG00000038417.4	Fig4	-0.218195	5.67266	-4.65772	0.000508346	0.00622542	-0.822847	WT_GMTP-WT_UT
ENSMUSG00000017446.14	C1qtnf1	-3.18594	-3.57055	-4.65697	0.000509015	0.0062302	-0.00101731	WT_GMTP-WT_UT
ENSMUSG00000041762.16	Gpr155	-0.348734	5.62329	-4.6554	0.000510422	0.006244	-0.82446	WT_GMTP-WT_UT
ENSMUSG00000039703.15	Nploc4	0.210693	6.51262	4.65185	0.000513614	0.0062796	-0.868655	WT_GMTP-WT_UT
ENSMUSG00000100615.1	Gm5511	3.65715	-4.01295	4.64553	0.000519351	0.00634627	-0.0913049	WT_GMTP-WT_UT
ENSMUSG00000003873.11	Bax	0.37331	5.95149	4.64128	0.000523252	0.00639044	-0.866019	WT_GMTP-WT_UT
ENSMUSG00000023272.4	Creld2	0.348263	4.84491	4.63961	0.000524785	0.00640565	-0.801176	WT_GMTP-WT_UT
ENSMUSG00000005803.14	Sqor	0.292323	5.87493	4.63846	0.000525852	0.00641516	-0.86773	WT_GMTP-WT_UT
ENSMUSG00000028643.11	Svbp	0.428615	4.07911	4.63722	0.000526997	0.00642562	-0.722761	WT_GMTP-WT_UT
ENSMUSG00000106438.1	Gm32051	-3.53549	-3.7603	-4.63637	0.000527788	0.00643175	-0.0622479	WT_GMTP-WT_UT
ENSMUSG00000008305.18	Tle1	-0.313819	5.78894	-4.63531	0.000528778	0.0064403	-0.869327	WT_GMTP-WT_UT
ENSMUSG00000035722.15	Abca7	0.281764	5.92427	4.63483	0.000529217	0.00644213	-0.876554	WT_GMTP-WT_UT
ENSMUSG00000025746.11	Il6	5.8808	-5.58478	4.6336	0.000530366	0.0064526	-0.383822	WT_GMTP-WT_UT
ENSMUSG00000060012.9	Kif13b	-0.377884	7.22106	-4.6323	0.000531584	0.00646389	-0.924848	WT_GMTP-WT_UT
ENSMUSG00000056394.17	Lig1	-0.333031	4.62309	-4.62613	0.000537384	0.00652835	-0.805487	WT_GMTP-WT_UT
ENSMUSG00000020330.16	Hmmr	-0.498994	2.84215	-4.62604	0.000537471	0.00652835	-0.537967	WT_GMTP-WT_UT
ENSMUSG00000117465.1	Gm49980	-0.57638	1.4598	-4.62475	0.000538691	0.00653961	-0.290678	WT_GMTP-WT_UT
ENSMUSG00000010376.15	Nedd8	0.314192	6.35433	4.62426	0.000539164	0.0065418	-0.913291	WT_GMTP-WT_UT
ENSMUSG00000045912.9	C2cd4c	-4.84711	-4.53358	-4.62337	0.000540002	0.00654496	-0.206703	WT_GMTP-WT_UT
ENSMUSG00000033685.13	Ucp2	-0.240585	9.95513	-4.62336	0.000540011	0.00654496	-0.972955	WT_GMTP-WT_UT
ENSMUSG00000038393.14	Txnip	-0.229048	8.5815	-4.62181	0.000541494	0.00655937	-0.967735	WT_GMTP-WT_UT
ENSMUSG00000005142.10	Man2b1	-0.254747	10.4166	-4.62038	0.00054286	0.00656901	-0.978346	WT_GMTP-WT_UT
ENSMUSG00000042535.9	Gtpbp1	0.254967	5.89826	4.62036	0.000542879	0.00656901	-0.901761	WT_GMTP-WT_UT
ENSMUSG00000078122.4	F630028O10Rik	-0.444245	3.66073	-4.61956	0.000543641	0.00657466	-0.694064	WT_GMTP-WT_UT
ENSMUSG00000029925.13	Tbxas1	-0.269734	6.83655	-4.61583	0.000547226	0.00661444	-0.944464	WT_GMTP-WT_UT
ENSMUSG00000038023.12	Atp6v0a2	0.271314	5.98057	4.61475	0.000548266	0.00662342	-0.915579	WT_GMTP-WT_UT
ENSMUSG00000056258.9	Kcnq3	-2.65874	-2.35352	-4.61405	0.000548943	0.00662801	0.0467043	WT_GMTP-WT_UT
ENSMUSG00000033214.10	Slitrk5	-3.86593	-6.74151	-4.61081	0.000552085	0.00666234	-0.63983	WT_GMTP-WT_UT
ENSMUSG00000021981.10	Cab39l	0.281746	5.23787	4.60971	0.000553163	0.00667175	-0.884917	WT_GMTP-WT_UT
ENSMUSG00000032330.7	Cox7a2	0.327128	5.44328	4.60728	0.000555534	0.00669673	-0.902035	WT_GMTP-WT_UT
ENSMUSG00000039191.12	Rbpj	0.345401	6.80474	4.60624	0.000556548	0.00670533	-0.961008	WT_GMTP-WT_UT
ENSMUSG00000024423.6	Impact	-0.231284	6.42589	-4.60507	0.000557697	0.00671221	-0.950776	WT_GMTP-WT_UT
ENSMUSG00000025058.4	5430427O19Rik	0.300507	4.53434	4.60505	0.000557722	0.00671221	-0.834968	WT_GMTP-WT_UT
ENSMUSG00000026812.16	Tsc1	-0.38014	5.76705	-4.6034	0.000559342	0.00672809	-0.926345	WT_GMTP-WT_UT
ENSMUSG00000038578.15	Susd1	-0.330835	3.18665	-4.60002	0.000562696	0.00676478	-0.648264	WT_GMTP-WT_UT
ENSMUSG00000028917.14	Plekhm2	-0.272024	7.20049	-4.59766	0.00056504	0.0067893	-0.987485	WT_GMTP-WT_UT
ENSMUSG00000037706.17	Cd81	-0.437782	4.34649	-4.59451	0.000568187	0.00681997	-0.833685	WT_GMTP-WT_UT
ENSMUSG00000031756.5	Cenpn	-0.4912	1.49314	-4.59449	0.000568207	0.00681997	-0.350347	WT_GMTP-WT_UT
ENSMUSG00000048200.12	Cracr2b	-0.395829	3.70193	-4.59419	0.000568509	0.00681997	-0.746615	WT_GMTP-WT_UT
ENSMUSG00000001482.15	Def8	0.335164	5.36336	4.59186	0.000570852	0.0068444	-0.925288	WT_GMTP-WT_UT
ENSMUSG00000022151.16	Ttc33	0.280286	4.89541	4.5912	0.000571513	0.00684864	-0.893359	WT_GMTP-WT_UT
ENSMUSG00000026069.15	Il1rl1	-1.69903	-1.35689	-4.58959	0.000573138	0.00686125	-0.00713908	WT_GMTP-WT_UT
ENSMUSG00000103145.1	Gm37744	-3.5335	-7.00317	-4.58955	0.000573181	0.00686125	-0.715179	WT_GMTP-WT_UT
ENSMUSG00000051498.7	Tlr6	0.280824	5.28546	4.58639	0.000576387	0.00689486	-0.930409	WT_GMTP-WT_UT
ENSMUSG00000015461.15	Atf6b	0.323935	6.7189	4.58592	0.000576868	0.00689486	-0.995486	WT_GMTP-WT_UT
ENSMUSG00000085890.7	Tnfsf13os	-0.697067	0.661799	-4.58561	0.000577189	0.00689486	-0.233882	WT_GMTP-WT_UT
ENSMUSG00000039377.7	Hlx	0.44563	5.75882	4.58552	0.000577275	0.00689486	-0.958556	WT_GMTP-WT_UT
ENSMUSG00000024737.2	Slc15a3	0.248144	8.75609	4.58527	0.000577533	0.00689486	-1.03621	WT_GMTP-WT_UT
ENSMUSG00000029640.17	Usp12	0.216339	6.7228	4.58477	0.000578044	0.00689727	-0.997715	WT_GMTP-WT_UT
ENSMUSG00000045502.6	Hcar2	1.25411	0.161636	4.58401	0.000578813	0.00690231	-0.165432	WT_GMTP-WT_UT
ENSMUSG00000018774.13	Cd68	-0.226572	10.3928	-4.58375	0.000579085	0.00690231	-1.04523	WT_GMTP-WT_UT
ENSMUSG00000059534.8	Uqcr10	0.400289	5.02792	4.58285	0.000580003	0.00690956	-0.919052	WT_GMTP-WT_UT
ENSMUSG00000024617.16	Camk2a	-0.790356	1.1821	-4.58143	0.000581465	0.00692328	-0.322191	WT_GMTP-WT_UT
ENSMUSG00000045438.12	Cox19	0.401309	3.84114	4.58058	0.000582339	0.00692999	-0.79225	WT_GMTP-WT_UT
ENSMUSG00000104268.1	Gm37750	2.64999	-6.34933	4.57888	0.000584086	0.00694707	-0.598249	WT_GMTP-WT_UT
ENSMUSG00000044066.14	Cep68	-0.364949	3.67874	-4.57791	0.000585089	0.00695493	-0.772575	WT_GMTP-WT_UT
ENSMUSG00000097365.7	C030034L19Rik	-0.979536	-0.492328	-4.57764	0.00058537	0.00695493	-0.0972351	WT_GMTP-WT_UT
ENSMUSG00000086652.1	Gm14029	-3.84217	-4.30645	-4.5752	0.0005879	0.00698127	-0.234819	WT_GMTP-WT_UT
ENSMUSG00000033436.13	Armcx2	-0.578884	1.95631	-4.57478	0.000588334	0.00698165	-0.466174	WT_GMTP-WT_UT
ENSMUSG00000075284.10	Wipf1	-0.196791	8.16539	-4.57456	0.000588558	0.00698165	-1.04862	WT_GMTP-WT_UT
ENSMUSG00000057554.13	Lgals8	0.244327	7.29008	4.57394	0.000589203	0.00698559	-1.03294	WT_GMTP-WT_UT
ENSMUSG00000060090.16	Rp2	0.284819	6.5331	4.57281	0.000590383	0.00699565	-1.01341	WT_GMTP-WT_UT
ENSMUSG00000025372.16	Baiap2	-0.325245	5.58393	-4.5721	0.000591129	0.00699565	-0.974026	WT_GMTP-WT_UT
ENSMUSG00000037509.21	Arhgef4	-0.583067	1.64732	-4.57201	0.000591217	0.00699565	-0.416868	WT_GMTP-WT_UT
ENSMUSG00000021823.10	Vcl	-0.365954	4.59971	-4.57193	0.000591305	0.00699565	-0.90198	WT_GMTP-WT_UT
ENSMUSG00000115987.1	Vps28	0.270528	5.39667	4.56988	0.000593453	0.00701659	-0.967472	WT_GMTP-WT_UT
ENSMUSG00000014504.16	Srp19	0.345631	4.14787	4.56964	0.000593704	0.00701659	-0.854777	WT_GMTP-WT_UT
ENSMUSG00000024143.15	Rhoq	0.319516	5.80959	4.56839	0.000595019	0.0070284	-0.992328	WT_GMTP-WT_UT
ENSMUSG00000030427.17	Lilra6	-0.544474	3.0015	-4.56668	0.000596813	0.00704587	-0.674916	WT_GMTP-WT_UT
ENSMUSG00000022836.11	Mylk	-0.787338	-0.73321	-4.56594	0.000597594	0.00704931	-0.0932409	WT_GMTP-WT_UT
ENSMUSG00000006736.9	Tspan31	0.236596	6.42834	4.56581	0.000597737	0.00704931	-1.02254	WT_GMTP-WT_UT
ENSMUSG00000020385.16	Clk4	-0.258256	4.76786	-4.5623	0.000601458	0.00708945	-0.935397	WT_GMTP-WT_UT
ENSMUSG00000028792.14	Ak2	0.310519	6.33622	4.56112	0.000602717	0.00710054	-1.02784	WT_GMTP-WT_UT
ENSMUSG00000030609.18	Aen	0.294582	4.05411	4.55858	0.000605431	0.00712875	-0.862366	WT_GMTP-WT_UT
ENSMUSG00000048852.13	Gm12185	0.606868	1.75048	4.55739	0.000606706	0.00713999	-0.461086	WT_GMTP-WT_UT
ENSMUSG00000093930.2	Hmgcs1	0.290349	5.8314	4.55683	0.000607305	0.00714328	-1.01451	WT_GMTP-WT_UT
ENSMUSG00000019978.16	Epb41l2	-0.248249	7.39358	-4.55596	0.000608241	0.00715052	-1.06828	WT_GMTP-WT_UT
ENSMUSG00000031617.16	Tmem184c	-0.329417	4.83916	-4.55477	0.000609527	0.00716186	-0.955272	WT_GMTP-WT_UT
ENSMUSG00000019158.9	Tmem160	0.399223	5.28696	4.55426	0.000610074	0.00716452	-0.989161	WT_GMTP-WT_UT
ENSMUSG00000020917.17	Acly	0.212095	7.72452	4.55373	0.000610647	0.00716498	-1.07928	WT_GMTP-WT_UT
ENSMUSG00000105741.1	C79130	-0.881078	-1.07264	-4.55363	0.000610756	0.00716498	-0.085703	WT_GMTP-WT_UT
ENSMUSG00000030465.19	Psd3	-0.621618	4.2874	-4.55231	0.000612183	0.00717795	-0.903508	WT_GMTP-WT_UT
ENSMUSG00000013236.17	Ptprs	-0.397532	6.3655	-4.5502	0.00061447	0.00720098	-1.04884	WT_GMTP-WT_UT
ENSMUSG00000030102.11	Itpr1	0.584459	5.36508	4.54714	0.000617814	0.00723637	-1.00704	WT_GMTP-WT_UT
ENSMUSG00000112759.1	Gm47615	-3.52519	-6.53343	-4.54535	0.000619776	0.00725554	-0.672808	WT_GMTP-WT_UT
ENSMUSG00000114907.1	Gm47794	-3.59833	-4.93201	-4.54204	0.000623413	0.00729309	-0.381285	WT_GMTP-WT_UT
ENSMUSG00000027776.12	Il12a	5.9927	-6.12143	4.54184	0.000623637	0.00729309	-0.597496	WT_GMTP-WT_UT
ENSMUSG00000062590.13	Armc9	-0.437299	2.83608	-4.5388	0.000627002	0.00732796	-0.694767	WT_GMTP-WT_UT
ENSMUSG00000001911.16	Nfix	0.40397	3.17979	4.53844	0.000627401	0.00732796	-0.758792	WT_GMTP-WT_UT
ENSMUSG00000021180.9	Rps6ka5	-0.4518	3.41962	-4.5375	0.000628454	0.00732796	-0.803211	WT_GMTP-WT_UT
ENSMUSG00000026895.7	Ndufa8	0.28398	6.00023	4.53742	0.000628537	0.00732796	-1.05763	WT_GMTP-WT_UT
ENSMUSG00000073494.5	Sh2d1b2	-3.1782	-4.42899	-4.53738	0.000628579	0.00732796	-0.305538	WT_GMTP-WT_UT
ENSMUSG00000031586.17	Rbpms	0.544576	2.14084	4.53738	0.000628589	0.00732796	-0.567002	WT_GMTP-WT_UT
ENSMUSG00000029919.5	Hpgds	-0.235195	8.04491	-4.53448	0.000631823	0.00736028	-1.12015	WT_GMTP-WT_UT
ENSMUSG00000069910.2	Spdl1	-0.271103	5.10641	-4.53406	0.000632289	0.00736028	-1.01376	WT_GMTP-WT_UT
ENSMUSG00000048480.5	Cxcr1	-3.96934	-3.49139	-4.53401	0.000632351	0.00736028	-0.168307	WT_GMTP-WT_UT
ENSMUSG00000021453.2	Gadd45g	-0.475374	4.77698	-4.53295	0.000633535	0.00737021	-0.989836	WT_GMTP-WT_UT
ENSMUSG00000047591.5	Mafa	-0.847668	0.0686562	-4.53227	0.000634303	0.0073753	-0.243667	WT_GMTP-WT_UT
ENSMUSG00000070942.8	Il1rl2	-0.487806	2.4395	-4.52915	0.000637824	0.00741237	-0.637339	WT_GMTP-WT_UT
ENSMUSG00000002844.9	Adprh	0.297684	6.24475	4.52815	0.000638952	0.00742162	-1.08465	WT_GMTP-WT_UT
ENSMUSG00000090222.2	Ifi203-ps	0.913028	2.11125	4.52515	0.000642355	0.00745726	-0.583628	WT_GMTP-WT_UT
ENSMUSG00000036644.15	Tbc1d9b	0.248217	7.12137	4.52404	0.000643627	0.00746815	-1.12007	WT_GMTP-WT_UT
ENSMUSG00000106365.1	Gm43568	-1.60808	-2.88746	-4.52262	0.000645247	0.00748305	-0.122723	WT_GMTP-WT_UT
ENSMUSG00000112843.1	Gm46224	0.706468	1.18776	4.52132	0.000646738	0.00749645	-0.430431	WT_GMTP-WT_UT
ENSMUSG00000026087.11	Mrpl30	0.278088	4.93063	4.51907	0.000649326	0.00752186	-1.02796	WT_GMTP-WT_UT
ENSMUSG00000081228.1	Gm16089	3.37119	-4.40554	4.51856	0.000649918	0.00752186	-0.32759	WT_GMTP-WT_UT
ENSMUSG00000081170.1	Gm12922	3.53262	-6.3916	4.51853	0.000649941	0.00752186	-0.676449	WT_GMTP-WT_UT
ENSMUSG00000038866.15	Zcchc2	0.346265	5.89053	4.51501	0.000654014	0.00756506	-1.09382	WT_GMTP-WT_UT
ENSMUSG00000000791.9	Il12rb1	1.05561	0.513799	4.51355	0.000655713	0.00758079	-0.339379	WT_GMTP-WT_UT
ENSMUSG00000028717.12	Tal1	-0.302691	3.72699	-4.51255	0.000656882	0.00759037	-0.899204	WT_GMTP-WT_UT
ENSMUSG00000040687.16	Madd	0.258995	6.88739	4.51048	0.000659299	0.00761435	-1.13853	WT_GMTP-WT_UT
ENSMUSG00000032180.11	Tmed1	0.39183	3.65579	4.50867	0.000661415	0.00763295	-0.895074	WT_GMTP-WT_UT
ENSMUSG00000008393.9	Carhsp1	0.211327	5.89215	4.50852	0.000661593	0.00763295	-1.10579	WT_GMTP-WT_UT
ENSMUSG00000043391.10	2510009E07Rik	-0.342355	6.14723	-4.5081	0.000662091	0.00763475	-1.11755	WT_GMTP-WT_UT
ENSMUSG00000026641.13	Usf1	0.345761	6.19168	4.50579	0.000664808	0.00766211	-1.12352	WT_GMTP-WT_UT
ENSMUSG00000103213.1	Gm38289	-2.55438	-3.92353	-4.50441	0.000666447	0.00767704	-0.275987	WT_GMTP-WT_UT
ENSMUSG00000112140.1	Gm5780	-3.18776	-4.92902	-4.5041	0.000666806	0.00767721	-0.430496	WT_GMTP-WT_UT
ENSMUSG00000024063.13	Lbh	-0.262102	5.47996	-4.50107	0.00067041	0.00771473	-1.09823	WT_GMTP-WT_UT
ENSMUSG00000005514.14	Por	-0.307932	8.61728	-4.49731	0.000674896	0.00776199	-1.19585	WT_GMTP-WT_UT
ENSMUSG00000029059.9	Prxl2b	0.387584	4.58757	4.49705	0.000675212	0.00776199	-1.03762	WT_GMTP-WT_UT
ENSMUSG00000030811.14	Fbxl19	0.35012	4.76175	4.49586	0.000676641	0.0077744	-1.05633	WT_GMTP-WT_UT
ENSMUSG00000072115.11	Ang	-0.886971	1.03767	-4.49242	0.000680795	0.0078181	-0.457871	WT_GMTP-WT_UT
ENSMUSG00000021770.11	Samd8	-0.351561	6.56868	-4.49176	0.000681587	0.00782317	-1.16299	WT_GMTP-WT_UT
ENSMUSG00000032782.19	Cntrob	-0.421474	2.70296	-4.49106	0.000682435	0.00782888	-0.756304	WT_GMTP-WT_UT
ENSMUSG00000036052.14	Dnajb5	0.31006	3.83888	4.49065	0.000682933	0.00783009	-0.955933	WT_GMTP-WT_UT
ENSMUSG00000024121.13	Atp6v0c	0.28959	9.28495	4.4904	0.000683242	0.00783009	-1.21397	WT_GMTP-WT_UT
ENSMUSG00000036372.14	Tmem258	0.295751	4.95737	4.48718	0.000687158	0.00787092	-1.08854	WT_GMTP-WT_UT
ENSMUSG00000018931.3	Natd1	-0.260061	5.40011	-4.48576	0.000688898	0.0078868	-1.12162	WT_GMTP-WT_UT
ENSMUSG00000001542.7	Ell2	0.312007	6.92741	4.48332	0.000691893	0.00791703	-1.18953	WT_GMTP-WT_UT
ENSMUSG00000021067.8	Sav1	0.378442	5.29174	4.48292	0.000692387	0.00791863	-1.12007	WT_GMTP-WT_UT
ENSMUSG00000031958.16	Ldhd	-0.751119	-0.570979	-4.48213	0.000693368	0.00792578	-0.253887	WT_GMTP-WT_UT
ENSMUSG00000052563.13	D930048N14Rik	-0.696533	1.46342	-4.48122	0.000694482	0.00793444	-0.548428	WT_GMTP-WT_UT
ENSMUSG00000079445.3	B3gnt7	-0.794065	0.93234	-4.48064	0.000695202	0.00793625	-0.462141	WT_GMTP-WT_UT
ENSMUSG00000030376.8	Slc8a2	-2.71943	-3.568	-4.48052	0.000695353	0.00793625	-0.257646	WT_GMTP-WT_UT
ENSMUSG00000022673.5	Mcm4	-0.257413	4.77378	-4.48023	0.000695707	0.00793625	-1.08608	WT_GMTP-WT_UT
ENSMUSG00000042644.9	Itpr3	-0.506205	4.94959	-4.47815	0.000698291	0.00796165	-1.10448	WT_GMTP-WT_UT
ENSMUSG00000113195.1	Gm48586	-3.52586	-7.30827	-4.47355	0.000704034	0.00802304	-0.899696	WT_GMTP-WT_UT
ENSMUSG00000032301.13	Psma4	0.314436	6.29125	4.47216	0.000705774	0.00803877	-1.18916	WT_GMTP-WT_UT
ENSMUSG00000079418.3	Atg4a	0.28039	4.39053	4.46764	0.000711477	0.00809959	-1.07047	WT_GMTP-WT_UT
ENSMUSG00000071713.6	Csf2rb	0.216958	9.2542	4.46684	0.000712482	0.00810542	-1.25707	WT_GMTP-WT_UT
ENSMUSG00000014846.12	Tppp3	1.49221	-0.812717	4.46666	0.000712716	0.00810542	-0.256231	WT_GMTP-WT_UT
ENSMUSG00000048371.8	Pdp2	0.292155	4.53794	4.46437	0.000715623	0.00813433	-1.0924	WT_GMTP-WT_UT
ENSMUSG00000030314.16	Atg7	-0.216592	6.53149	-4.46107	0.000719842	0.00817813	-1.21812	WT_GMTP-WT_UT
ENSMUSG00000024665.8	Fads2	0.335122	3.08795	4.46018	0.000720989	0.00818608	-0.884721	WT_GMTP-WT_UT
ENSMUSG00000020133.8	2310011J03Rik	0.258737	5.85686	4.45996	0.000721276	0.00818608	-1.19328	WT_GMTP-WT_UT
ENSMUSG00000001227.12	Sema6b	0.493446	4.2657	4.4588	0.000722765	0.00819367	-1.0719	WT_GMTP-WT_UT
ENSMUSG00000048142.9	Nat8l	-0.641441	2.7201	-4.45872	0.000722869	0.00819367	-0.818425	WT_GMTP-WT_UT
ENSMUSG00000005087.17	Cd44	-0.26116	8.0838	-4.45858	0.000723047	0.00819367	-1.26007	WT_GMTP-WT_UT
ENSMUSG00000028970.9	Abcb1b	-0.307821	5.68494	-4.45665	0.000725533	0.00821767	-1.19092	WT_GMTP-WT_UT
ENSMUSG00000034854.8	Mfsd12	-0.243033	9.0794	-4.45563	0.000726855	0.00822767	-1.27657	WT_GMTP-WT_UT
ENSMUSG00000090675.2	Olfr111	-0.892711	2.48426	-4.4554	0.000727153	0.00822767	-0.779631	WT_GMTP-WT_UT
ENSMUSG00000073982.11	Rhog	0.290942	7.93819	4.45438	0.000728472	0.00823564	-1.2654	WT_GMTP-WT_UT
ENSMUSG00000024165.9	Jpt2	0.241495	5.5443	4.45429	0.000728596	0.00823564	-1.18764	WT_GMTP-WT_UT
ENSMUSG00000026640.12	Plxna2	-0.533911	5.60046	-4.45223	0.000731281	0.0082618	-1.19454	WT_GMTP-WT_UT
ENSMUSG00000015027.11	Galns	-0.234862	6.51941	-4.45192	0.000731682	0.00826216	-1.23455	WT_GMTP-WT_UT
ENSMUSG00000040775.6	Gm9772	2.89495	-6.96473	4.45049	0.000733552	0.00827909	-0.862028	WT_GMTP-WT_UT
ENSMUSG00000037572.17	Wdhd1	-0.358995	3.49981	-4.44843	0.000736243	0.00830178	-0.979763	WT_GMTP-WT_UT
ENSMUSG00000104272.1	Gm38297	3.58727	-5.09738	4.44838	0.000736307	0.00830178	-0.531169	WT_GMTP-WT_UT
ENSMUSG00000024539.17	Ptpn2	0.386432	4.47471	4.44726	0.000737784	0.008314	-1.11698	WT_GMTP-WT_UT
ENSMUSG00000002007.5	Srpk3	-1.6394	-1.78104	-4.44684	0.00073834	0.008314	-0.227068	WT_GMTP-WT_UT
ENSMUSG00000017493.12	Igfbp4	-0.330417	6.49635	-4.44671	0.000738509	0.008314	-1.24333	WT_GMTP-WT_UT
ENSMUSG00000030677.8	Kif22	-0.389484	3.06008	-4.4463	0.000739051	0.0083159	-0.904976	WT_GMTP-WT_UT
ENSMUSG00000031216.13	Stard8	-0.280059	6.45153	-4.44456	0.000741345	0.00833752	-1.2457	WT_GMTP-WT_UT
ENSMUSG00000031647.10	Mfap3l	-0.477698	4.21231	-4.4425	0.000744067	0.00836274	-1.09525	WT_GMTP-WT_UT
ENSMUSG00000053963.7	Stum	-0.825518	0.289721	-4.4423	0.000744338	0.00836274	-0.432956	WT_GMTP-WT_UT
ENSMUSG00000017639.13	Rab11fip4	-0.931157	0.112588	-4.44106	0.000745988	0.00837707	-0.410137	WT_GMTP-WT_UT
ENSMUSG00000023973.13	Cnpy3	0.268357	6.67963	4.44008	0.000747285	0.00838741	-1.26156	WT_GMTP-WT_UT
ENSMUSG00000039716.12	Dock3	-0.919715	-0.13572	-4.4376	0.00075061	0.0084176	-0.383065	WT_GMTP-WT_UT
ENSMUSG00000002996.17	Hbp1	-0.230584	6.32609	-4.43751	0.00075073	0.0084176	-1.25419	WT_GMTP-WT_UT
ENSMUSG00000054580.14	Pla2r1	0.571534	1.22788	4.43493	0.000754181	0.00845206	-0.592035	WT_GMTP-WT_UT
ENSMUSG00000036533.9	Cdc42ep3	-0.409062	3.75442	-4.43332	0.000756354	0.00847215	-1.04826	WT_GMTP-WT_UT
ENSMUSG00000028864.7	Hgf	-0.469071	5.30601	-4.43236	0.000757659	0.00848251	-1.21385	WT_GMTP-WT_UT
ENSMUSG00000042647.13	Acad12	-0.346242	4.57302	-4.42959	0.000761414	0.00852028	-1.15992	WT_GMTP-WT_UT
ENSMUSG00000024299.17	Adamts10	-0.318584	4.44349	-4.42906	0.000762137	0.00852388	-1.14702	WT_GMTP-WT_UT
ENSMUSG00000026249.10	Serpine2	-0.826308	0.557042	-4.42879	0.0007625	0.00852388	-0.496453	WT_GMTP-WT_UT
ENSMUSG00000035559.9	Mpv17l2	0.41068	4.79857	4.42831	0.000763151	0.00852688	-1.18362	WT_GMTP-WT_UT
ENSMUSG00000000126.11	Wnt9a	-0.771999	-0.547832	-4.42604	0.000766255	0.00855541	-0.353742	WT_GMTP-WT_UT
ENSMUSG00000028059.16	Arhgef2	0.192274	7.87013	4.42588	0.000766471	0.00855541	-1.31673	WT_GMTP-WT_UT
[truncated: 1,436 more rows]
