# Supplementary material for: PGLYRP-1 mediated intracellular peptidoglycan detection promotes mucosal protection
Source: Research Square preprint supplement (doi:10.21203/rs.3.rs-5118704/v1), 2024-10-14
Supplement: Supplementary file 13 [file c394bb2e8ce8d4ccdbc4f9ff.xlsx]

## Sheet: Experimental Information
Person carrying out experiment
	Rachel Putnik
Start Date:	2023-03-23
End Date:	2023-03-23
Array Version:	A117
Batch:	1
Slide Number(s):	2
1. Blocking
Blocking Solution:	50 mM EA/borate pH 8.0
Temperature:	RT
Duration	1 h
BSA Manufacturer (Lot #):	N/A
First Washes: 4x quick wash with PBST, 1x2 min dH2O, spin down 5 min @ 1000 rpm
2. Incubation with Primary Antibodies, Serum or Lectin
Incubation Buffer:	PBST
Sample Dilution:
Positive Control(s):
Negative Control(s):
Incubation Conditions:	37 C
Duration:	2 h
BSA Manufacturer (Lot #):	N/A
HSA Manufacturer (Lot #):	N/A
2nd Washes: 4x quick wash with PBST, 3x2 min PBST, 1x2min PBS
3. Incubation with Secondary Antibodies
Incubation Buffer:	PBST
Secondary Antibody:
Dilution of Secondary Antibody:	1 to 500
Incubation Conditions:	37 C
Duration:	1 h
BSA Manufacturer (Lot #):	N/A
HSA Manufacturer (Lot #):	N/A
Final Washes: 4x quick wash with PBST, 3x2 min PBST, 5 min submerge in dH2O, spin at 100 RPM for 5 min
4. Microarray Settings:
Prescan PMT (635/532):	(100/100)
High Intensity PMT (635/532):	(25/5)
Low Intensity PMT (635/532):	(9/1)
Pixel Size:
Line Speed:	35

## Sheet: PGLYRP focused array
				Individual Well Data. Background Removed.
			sample	PGLYRP-1	PGLYRP-1	PGLYRP-1	PGLYRP-1		PGLYRP-3	PGLYRP-3	PGLYRP-3	PGLYRP-3		PGLYRP-4	PGLYRP-4	PGLYRP-4	PGLYRP-4
			sample conc.	10 ug/mL	10 ug/mL	10 ug/mL	10 ug/mL		10 ug/mL	10 ug/mL	10 ug/mL	10 ug/mL		10 ug/mL	10 ug/mL	10 ug/mL	10 ug/mL
			primary	anti-PGLYRP-1	anti-PGLYRP-1	anti-PGLYRP-1	anti-PGLYRP-1		anti-PGLYRP-3	anti-PGLYRP-3	anti-PGLYRP-3	anti-PGLYRP-3		anti-PGLYRP-4	anti-PGLYRP-4	anti-PGLYRP-4	anti-PGLYRP-4
			secondary	mIgG-Cy3	mIgG-Cy3	mIgG-Cy3	mIgG-Cy3		mIgG-Cy3	mIgG-Cy3	mIgG-Cy3	mIgG-Cy3		mIgG-Cy3	mIgG-Cy3	mIgG-Cy3	mIgG-Cy3
			buffer	PBST	PBST	PBST	PBST		PBST	PBST	PBST	PBST		PBST	PBST	PBST	PBST
			person carrying out experiment	Rachel	Rachel	Rachel	Rachel		Rachel	Rachel	Rachel	Rachel		Rachel	Rachel	Rachel	Rachel
			lot	1	1	1	1		1	1	1	1		1	1	1	1
			slide	10355238	10355238	10355238	10355238		10355238	10355238	10355238	10355238		10355238	10355238	10355238	10355238
			array	A117	A117	A117	A117		A117	A117	A117	A117		A117	A117	A117	A117
			pin	1	2	3	4		1	2	3	4		1	2	3	4
			channel	532	532	532	532		532	532	532	532		532	532	532	532
Print ID	Abbreviaton	Concentration (uM)
1	Cy3 sulfo-2	2		34.5	30	35.5	34		25	26.5	25	26		25.5	25.5	27	27
2	human IgG-200	200		544.5	85	237.5	114		26	26	25.5	25.5		25	25	27	27
3	human IgM-200	200		76.5	40.5	70	115.5		25.5	26	26	25.5		25	25.5	26	27
4	human IgG-50	50		39	32.5	40	41.5		25.5	26.5	25.5	25.5		25	25.5	26	27
5	human IgM-50	50		50	32.5	43	51		25	26.5	26	25.5		24.5	25	26.5	27
6	blank1	0		34	29.5	32	33		25.5	26	26	26		25	25	26.5	27
7	6-amino MDP-200	200		31.5	30	34.5	33.5		25	26	25.5	25.5		25	25.5	27	27.5
8	1-PEG MDP-200	200		31.5	30	33	35		26	26	25	25.5		25	24.5	27	27
9	1-C3-MDP-200	200		32.5	31	34	33.5		26	26	25	25		25	25	27	27
10	6-C3-MDP-200	200		35	32	34	32.5		25.5	26	25	25		25	25	26.5	27
11	6-PEG-MDP-200	200		37.5	32.5	33.5	33		25.5	27	25	25		25	25	27	28
12	D-iso-Gln-C3-MDP-200	200		34	31.5	34.5	32.5		26	26.5	25	25		25.5	24	27	27.5
13	D-iso-Gln-PEG-MDP-200	200		32.5	32	32	34		25.5	26	24.5	25.5		25	25	27	27
14	6-PEG MDP-200	200		32.5	31	33.5	35		26	26.5	25	25		24.5	26	27	27
15	MurNAc(AlaGluOrn)-OH-200	200		87	85	58.5	45.5		25.5	25.5	25.5	25.5		25	25	27	27.5
16	MurNAc(AlaGlnOrn)-NH2-200	200		38.5	32	37.5	35		26	26	25.5	25.5		25	25	27	27.5
17	MurNAc(AlaGlnLys)-200	200		36	35.5	37.5	34.5		26	26	25.5	25		25.5	25	26.5	27.5
18	MurNAc(AlaGluLys)-200	200		34	32	35.5	32.5		26	25.5	25.5	26		25	25	27	28
19	1-C3-GlcNAc-200	200		32	31.5	34	32.5		25.5	26	25	26		25	25.5	27	28.5
20	1-PEG-GlcNAc-200	200		33	30.5	34.5	33		26	25	25.5	26		25	24.5	27.5	27.5
21	6-C3-GlcNAc-200	200		31.5	30.5	32.5	33		26.5	25	25.5	26		25	25	26.5	28
22	6-PEG-GlcNAc-200	200		32.5	30.5	34	33		25.5	26	25	26		25	24	27	26.5
23	6-amino GlcNAC-200	200		32.5	30.5	33.5	32		26	26.5	25	26		25.5	24	27.5	27
24	MeHNO-PEG3-NH2-200	200		33.5	32	33.5	32.5		26	27	25.5	26		25	24	27	27
25	MeHNO-short-NH2-200	200		31.5	32	35.5	32.5		26	26.5	25	25.5		25	25	27	27
26	Ethanolamine-200	200		32.5	32	33.5	32		26	26.5	25	26		25	24	27	27.5
27	C3-linker on 6-200	200		32.5	31.5	35.5	32		26	27	25.5	26		24.5	24.5	27	26
28	PEG4-linker on 6-200	200		32.5	31	34	32		25.5	26	25	26		25	24.5	27	27
29	MurNAc(AlaGluOrnGly)-200	200		35	33	36.5	32.5		27	27.5	25.5	25		24.5	25.5	27.5	27.5
30	GlcNAc-MurNAc(AlaGluOrnGly)-200	200		1238	1226	1138	955		26	26.5	26	24		25	25.5	26.5	27
31	anhMurNAc(AlaGluOrnGly)-200	200		38.5	38	43.5	33.5		26.5	26.5	27	24.5		25	26	27.5	28
32	anhMurNAc(AlaGluOrn)-200	200		38.5	36.5	44	36.5		26	27	25.5	25.5		24	26	26.5	28
33	D-lactic acid-AlaGluOrnGly-200	200		32	31.5	33	31		25.5	26.5	25	25		24	25.5	27	27.5
34	1-C3-N-glycolyl MDP-200	200		32.5	31	32.5	31		26	26.5	26	25		24	26	27.5	27
35	GlcNAc-MurNAc(AlaGlnLys)-200	200		1047.5	1001.5	1045.5	1042.5		26	26.5	25.5	24.5		24.5	25.5	27	27
36	IE-dap-200	200		32.5	31	34	32.5		26.5	26.5	25	26.5		25	25	27.5	26
37	M-Tridap-200	200		1022.5	266.5	897.5	626.5		26.5	26	25.5	26		25	26	27.5	27
38	MurNAc(AlaGluOrnGlyGly)-200	200		107.5	47	82	41.5		26.5	26	25	26		25	25.5	27.5	26.5
39	MurNAc(AlaGlnLysGly)-200	200		36	35	35.5	32		26	26	25	26		25	25.5	27.5	26.5
40	MurNAc(AlaGlnLysGlyGly)-200	200		289.5	119.5	122	42		25.5	26.5	25	26		25	26	27.5	26
41	MurNAc(AlaGlu-D-OrnGlyGly)-200	200		32.5	30.5	34.5	31		26	27	25	27		24.5	25.5	27.5	26.5
42	MurNgly(AlaGlnLysGly)-200	200		47	35.5	38	33		26	26	25.5	26		25	25.5	27.5	26
43	MurNgly(AlaGluOrnGlyGly)-200	200		34	32.5	39.5	34		25	25	26	26		25	25.5	26	27
44	GlcNAc-anhMurNAc(AlaGlnLysGlyGly)-200	200		35.5	31	35.5	32.5		25	25.5	25.5	26		25	25	26	27
45	GlcNAc-anhMurNAc(AlaGluOrnGlyGly)-200	200		1201.5	1161	1099.5	1051.5		25	25.5	25.5	25.5		25	25.5	27	27.5
46	L-Ala-D-isoGln-L-Lys-200	200		31	33	33	31		24.5	25.5	26	25.5		25	25.5	26	27
47	L-Ala-D-isoGln-L-Lys-GlyGly-200	200		36.5	32.5	37.5	35		25	25	26	26		25.5	25.5	26.5	27
48	L-Ala-D-isoGln-L-Lys-Gly-200	200		34.5	31	34.5	31.5		25	25.5	25	26.5		25	25.5	27	27
49	L-Ala-D-Glu-L-Lys-200	200		33.5	31.5	34	32.5		25	25	25	25		25	25	26.5	26.5
50	L-Ala-D-Glu-L-Orn-200	200		33	31	35	33		25.5	26.5	24.5	27		25	25	27	27
51	L-Ala-D-Glu-L-Orn-Gly-200	200		34.5	32.5	48	34		25	25	25.5	27		25	25.5	27	28
52	L-Ala-D-Glu-L-Orn-GlyGly-200	200		33	31	36.5	32		26	26.5	25	26		25	26	27	27
53	BG-A-200	200		28.5	28.5	29	28.5		25	26	25.5	26		25	25.5	26.5	27
54	EZ-Link Amine-PEG-Biotin -200	0		31.5	30.5	33	31		25	25.5	25	26		25	25	27	27
55	blank2	0		32	31	31	31		26	26	26	27		25	25.5	27	27
56	6-amino MDP-50	50		31.5	30.5	31.5	31		25	26	25.5	26		25.5	25.5	26.5	27
57	1-PEG MDP-50	50		31.5	30.5	33.5	33.5		26	25.5	25.5	26.5		25	24.5	26	26
58	1-C3-MDP-50	50		31	30	33.5	33		26	25	26	26		24.5	25	26.5	26.5
59	6-C3-MDP-50	50		32	29.5	33.5	32		26	24.5	25.5	26		25.5	26	27.5	26.5
60	6-PEG-MDP-50	50		30	29.5	33	31.5		25	25	25.5	26		25	25	26.5	26.5
61	D-iso-Gln-C3-MDP-50	50		31	29.5	33	32		25	25	26	26		25	25	27.5	27
62	D-iso-Gln-PEG-MDP-50	50		31	29.5	32.5	31		25.5	25	25	26		25.5	25	27	26
63	6-PEG MDP-50	50		32	29.5	32.5	31.5		26	24.5	25.5	26.5		25	25.5	27	27
64	MurNAc(AlaGlnOrn)-NH2-50	50		31	48.5	60	35		26	26	25	25.5		25	26	26	26.5
65	MurNAc(AlaGlnLys)-OH-50	50		39.5	30.5	34	32		26	25	25.5	26		26	25	26.5	26.5
66	MurNAc(AlaGlnLys)-50	50		31.5	31	34.5	32.5		26.5	26	25	24.5		25.5	26	26.5	27
67	MurNAc(AlaGluLys)-50	50		33	31.5	35.5	31		25.5	26.5	26	26		25	26	26	27
68	1-C3-GlcNAc-50	50		30.5	29	33	31		25	26	25	26		25	26	27	26
69	1-PEG-GlcNAc-50	50		31	30.5	32.5	31		25.5	26	25.5	26		25	26.5	26	27
70	6-C3-GlcNAc-50	50		30.5	30.5	32	30.5		25	25.5	25.5	25.5		25.5	26	27	26.5
71	6-PEG-GlcNAc-50	50		30.5	31	33.5	33		26	25.5	25	26		25	24.5	26.5	27
72	6-amino GlcNAC-50	50		32.5	29.5	32.5	32		25	26.5	26	25.5		24.5	25	26	27
73	MeHNO-PEG3-NH2-50	50		30.5	30.5	33	32		25	26	25.5	25.5		25	25	27	27
74	MeHNO-short-NH2-50	50		32.5	32	34.5	32		25	26	26	25.5		25	25	26	27
75	Ethanolamine-50	50		31.5	30.5	34	31.5		25.5	25	25	26		25	25	26.5	27
76	C3-linker on 6-50	50		30.5	30	32.5	31.5		25.5	25.5	25.5	26.5		25	25	26	27
77	PEG4-linker on 6-50	50		31	29.5	32	31.5		25	25	26	25		25	25	26	26.5
78	MurNAc(AlaGluOrnGly)-50	50		31	35	36	33.5		25	26	25.5	26.5		25	25	27	26.5
79	GlcNAc-MurNAc(AlaGluOrnGly)-50	50		37.5	73.5	36	33.5		25.5	26	25	25.5		25	25.5	27	27.5
80	anhMurNAc(AlaGluOrnGly)-50	50		31.5	32.5	35	32.5		25	26	25	25.5		25	25.5	26	27
81	anhMurNAc(AlaGluOrn)-50	50		33	36	34	33		25	26	25	25.5		25	25.5	26	27
82	D-lactic acid-AlaGluOrnGly-50	50		34	31.5	34	31.5		25.5	25.5	25	25.5		25	25.5	27	27
83	1-C3-N-glycolyl MDP-50	50		32	31.5	33.5	31		24.5	25.5	24.5	26.5		25	26.5	26	26.5
84	GlcNAc-MurNAc(AlaGlnLys)-50	50		1146	702.5	1057.5	1095.5		26	25.5	25.5	25.5		24.5	26.5	26.5	27
85	IE-dap-50	50		31	32.5	35	32.5		25.5	25	25	25		26	24.5	27	26.5
86	M-Tridap-50	50		34	35	56.5	32		26	25	25.5	25.5		25.5	24.5	26	26
87	MurNAc(AlaGluOrnGlyGly)-50	50		62.5	71.5	215.5	34.5		25	24.5	24.5	26		25	25	26.5	27.5
88	MurNAc(AlaGlnLysGly)-50	50		33	33	35	31.5		25.5	25	25	26		25	25	26.5	25.5
89	MurNAc(AlaGlnLysGlyGly)-50	50		34	32.5	38	33.5		25	24.5	25	26.5		25	24.5	26.5	27
90	MurNAc(AlaGlu-D-OrnGlyGly)-50	50		32	30.5	33.5	31		25.5	25	25	26		25.5	24.5	27	27
91	MurNgly(AlaGlnLysGly)-50	50		37.5	30.5	32	33		25.5	24.5	25	26		25.5	24.5	26.5	26.5
92	MurNgly(AlaGluOrnGlyGly)-50	50		31	33	33.5	31.5		25	26	25	25.5		25	25.5	26.5	26.5
93	GlcNAc-anhMurNAc(AlaGlnLysGlyGly)-50	50		33.5	33.5	32	31.5		24.5	25	26	26		25	25.5	26.5	27
94	GlcNAc-anhMurNAc(AlaGluOrnGlyGly)-50	50		35.5	51	949	31.5		24.5	25.5	26	25.5		25	26	26	27
95	L-Ala-D-isoGln-L-Lys-50	50		32.5	33	33.5	31		25	26	25	25		25	25.5	26	27
96	L-Ala-D-isoGln-L-Lys-GlyGly-50	50		33	31	36.5	30		24.5	25.5	26	26		24.5	25.5	26	27
97	L-Ala-D-isoGln-L-Lys-Gly-50	50		32	31	33.5	30.5		24.5	25	25.5	25.5		25	26	26	27
98	L-Ala-D-Glu-L-Lys-50	50		31.5	30.5	30.5	31		24.5	25.5	26	25.5		25	26	26	27.5
99	L-Ala-D-Glu-L-Orn-50	50		31.5	32.5	34	31		25.5	27	25	25		26.5	26	26.5	26.5
100	L-Ala-D-Glu-L-Orn-Gly-50	50		33.5	32.5	33	31		25.5	26	25.5	25		26	26	27	27
101	L-Ala-D-Glu-L-Orn-GlyGly-50	50		31.5	31	32	30		25	25.5	26	26		26	26.5	27	27
102	BG-A-50	50		30.5	29	30	29		25	25	25.5	25.5		26	27	26.5	27
103	EZ-Link Amine-PEG-Biotin -2	2		31.5	30.5	34	29.5		25	26	25	25		26	26	27	27
104	Blank-50	50		30	31	32	30		26	26	25.5	25.5		26	26	27	27
105	6-amino MDP-100	100		29	29	30.5	30		26	26	25	25		26	26.5	27	26.5
106	1-PEG MDP-100	100		30	31	31	30		24.5	25.5	25	25.5		26	25.5	26.5	27
107	1-C3-MDP-100	100		31	30	30.5	31		25	24.5	25.5	25		26	26	27	27.5
108	6-C3-MDP-100	100		31.5	32.5	30	30		25	24	25.5	25.5		26	26	26.5	27
109	6-PEG-MDP-100	100		30.5	29.5	30.5	30		26	25	26	25		26	26	26.5	27
110	D-iso-Gln-C3-MDP-100	100		32.5	28.5	31.5	30		25.5	25	25	25.5		26	26	27	27.5

## Sheet: Dilution series focused array
			sample	PGLYRP-1	PGLYRP-1		PGLYRP-1	PGLYRP-1		PGLYRP-1	PGLYRP-1		PGLYRP-1	PGLYRP-1		PGLYRP-1	PGLYRP-1		PGLYRP-1	PGLYRP-1		PGLYRP-1	PGLYRP-1		PGLYRP-1	PGLYRP-1
			sample conc.	200 ug/mL	200 ug/mL		100 ug/mL	100 ug/mL		50 ug/mL	50 ug/mL		25 ug/mL	25 ug/mL		10 ug/mL	10 ug/mL		5 ug/mL	5 ug/mL		2 ug/mL	2 ug/mL		1 ug/mL	1 ug/mL
			primary	anti-PGLYRP-1	anti-PGLYRP-1		anti-PGLYRP-1	anti-PGLYRP-1		anti-PGLYRP-1	anti-PGLYRP-1		anti-PGLYRP-1	anti-PGLYRP-1		anti-PGLYRP-1	anti-PGLYRP-1		anti-PGLYRP-1	anti-PGLYRP-1		anti-PGLYRP-1	anti-PGLYRP-1		anti-PGLYRP-1	anti-PGLYRP-1
			secondary	mIgG-Cy3	mIgG-Cy3		mIgG-Cy3	mIgG-Cy3		mIgG-Cy3	mIgG-Cy3		mIgG-Cy3	mIgG-Cy3		mIgG-Cy3	mIgG-Cy3		mIgG-Cy3	mIgG-Cy3		mIgG-Cy3	mIgG-Cy3		mIgG-Cy3	mIgG-Cy3
			buffer	PBST	PBST		PBST	PBST		PBST	PBST		PBST	PBST		PBST	PBST		PBST	PBST		PBST	PBST		PBST	PBST
			person carrying out experiment	Rachel	Rachel		Rachel	Rachel		Rachel	Rachel		Rachel	Rachel		Rachel	Rachel		Rachel	Rachel		Rachel	Rachel		Rachel	Rachel
			lot	1	1		1	1		1	1		1	1		1	1		1	1		1	1		1	1
			slide	10355249	10355249		10355249	10355249		10355249	10355249		10355249	10355249		10355249	10355249		10355249	10355249		10355249	10355249		10355249	10355249
			array	A117	A117		A117	A117		A117	A117		A117	A117		A117	A117		A117	A117		A117	A117		A117	A117
			pin	1	2		1	2		1	2		1	2		1	2		1	2		1	2		1	2
			channel	532	532		532	532		532	532		532	532		532	532		532	532		532	532		532	532
Print ID	Abbreviaton	Concentration (uM)
1	Cy3 sulfo-2	2		856	2165		464.5	159		167	451		979.5	894		218	121.5		79.5	39		30.5	29.5		29	26.5
2	human IgG-200	200		4932	7664		6099	10863.5		778.5	2900.5		4557.5	6864		248.5	1252		483	43		31	28		24.5	25
3	human IgM-200	200		5022	7559.5		4832.5	11043.5		485.5	3127		3207	4718		279	1089.5		336	38.5		29.5	28.5		25	24
4	human IgG-50	50		2421	4224.5		2364	1929.5		165	778.5		2021	1985.5		172.5	609		184	39		30.5	31.5		25.5	24
5	human IgM-50	50		3001	6313		3738.5	10972.5		572	599.5		1517	3423.5		219	1293		171.5	53		31	30		29	24
6	blank1	0		535.5	5090.5		53	959		182.5	287		598.5	1314.5		65.5	832.5		43.5	35.5		31	29		28.5	24
7	6-amino MDP-200	200		452	101.5		66	70		71	248		412	946		52.5	316.5		30	28		30.5	27		24.5	24
8	1-PEG MDP-200	200		527.5	608		87.5	247.5		111.5	353		400.5	1306.5		108	120.5		36	34		29	28		25.5	25
9	1-C3-MDP-200	200		579	243		79.5	341.5		177.5	420.5		397	1141.5		69	166		43.5	34		29	28.5		24.5	24.5
10	6-C3-MDP-200	200		825	177		115	569.5		191	490		542	1356		70.5	228.5		66	36.5		29.5	29		23.5	24
11	6-PEG-MDP-200	200		417.5	91		107.5	566		119.5	540		540.5	1059.5		59	231.5		41.5	37		30.5	31		25	23.5
12	D-iso-Gln-C3-MDP-200	200		499	268		32	829		89	286		286	726.5		38.5	282		39.5	34.5		30	27.5		28	24
13	D-iso-Gln-PEG-MDP-200	200		803	106		298	571.5		142	191		514	708		55	430		29.5	41		33	29.5		28.5	24
14	6-PEG MDP-200	200		234.5	108.5		100	277.5		71	259		528	1063		55.5	380.5		30.5	27		33.5	28.5		25.5	25
15	MurNAc(AlaGluOrn)-OH-200	200		1197	1386		122.5	429.5		289	441.5		983.5	973		160.5	135		45.5	33		28.5	27.5		24.5	25
16	MurNAc(AlaGlnOrn)-NH2-200	200		1053	700.5		98	308		301	423		821	1427		67.5	232		54.5	37.5		27	27.5		24	24
17	MurNAc(AlaGlnLys)-200	200		2477.5	776		65	599		453	490		1119	1917.5		79.5	317.5		57.5	45		27.5	28		24	23.5
18	MurNAc(AlaGluLys)-200	200		684.5	428		68.5	558.5		153	433.5		535.5	846.5		59	232		46.5	37		28	30.5		24	24.5
19	1-C3-GlcNAc-200	200		618	333		103	1351		139.5	488		952.5	1884.5		74	464.5		61	101.5		28	28.5		25	24
20	1-PEG-GlcNAc-200	200		1198	208		75	1031.5		139.5	319		697.5	1370		57	303		48.5	56.5		28.5	28		25.5	24
21	6-C3-GlcNAc-200	200		142	162		90.5	889		82.5	357.5		1149	1109		79.5	450.5		45.5	34		30.5	27.5		24.5	23.5
22	6-PEG-GlcNAc-200	200		773.5	859.5		164	338		419	541.5		910.5	1398		217	302		58	46		28	33		25	24.5
23	6-amino GlcNAC-200	200		645	586.5		87	478		236	518.5		768.5	1568		88.5	262.5		70	60		26	29		25.5	24.5
24	MeHNO-PEG3-NH2-200	200		1174.5	1016		339.5	1845.5		305.5	667.5		1393	2197		195	487		215.5	128		27	29		27.5	24.5
25	MeHNO-short-NH2-200	200		1225	1124		299	848.5		228	526.5		910.5	1393.5		91	330.5		66.5	50		27.5	30		27.5	24.5
26	Ethanolamine-200	200		1470.5	1271		170.5	1179		160	506.5		682	1461		80	343.5		54	47		26.5	29.5		26	24.5
27	C3-linker on 6-200	200		1027.5	253		38.5	923		109.5	353		667.5	825.5		75	255		53.5	57		26.5	28.5		26	24
28	PEG4-linker on 6-200	200		121.5	108.5		63	1033		79.5	343		1465.5	651.5		103	319.5		46.5	44		26.5	26		23	24
29	MurNAc(AlaGluOrnGly)-200	200		726	1075.5		109	311		322	450		730	821		165.5	206		45	39.5		26	27.5		24.5	24
30	GlcNAc-MurNAc(AlaGluOrnGly)-200	200		12226	12760.5		12414	3021		3591	1021.5		16069.5	1445.5		90.5	331.5		114.5	59		26.5	29.5		25	24.5
31	anhMurNAc(AlaGluOrnGly)-200	200		486	364		199	350.5		245	509.5		934.5	591		71	178.5		50.5	50		27.5	28.5		25	24
32	anhMurNAc(AlaGluOrn)-200	200		330	524.5		92.5	311.5		165.5	393.5		1107.5	563.5		67	164		50.5	40.5		28	27.5		25	24
33	D-lactic acid-AlaGluOrnGly-200	200		943.5	427.5		75.5	580		143.5	450		1011	1199		68	232		50	41		27.5	28		25	24.5
34	1-C3-N-glycolyl MDP-200	200		797.5	846		1106	691.5		93	333		382	1190.5		55	247.5		42	39.5		27	26.5		24	24.5
35	GlcNAc-MurNAc(AlaGlnLys)-200	200		12652	14358.5		14803	17132		14529	16966		21230	14669.5		2935.5	8665		1494	1463		26	25.5		23.5	23.5
36	IE-dap-200	200		734	1978		422	563		445.5	527.5		668	1227		115	218		64	47		26.5	28.5		26.5	24.5
37	M-Tridap-200	200		7520.5	5859.5		8722.5	2507.5		997.5	619.5		3016.5	1010.5		102.5	289.5		99	63.5		28.5	30		23	24
38	MurNAc(AlaGluOrnGlyGly)-200	200		549.5	310.5		154	476.5		225	451.5		530	732.5		80	170		50	53.5		30	28.5		24	24
39	MurNAc(AlaGlnLysGly)-200	200		1136	806.5		312.5	1034		241	510		950.5	1101.5		105.5	255.5		64	46.5		27.5	28		23.5	24
40	MurNAc(AlaGlnLysGlyGly)-200	200		2802	1277.5		134	1252.5		196.5	655		1480.5	1323.5		86.5	317		55	41.5		29	28.5		24.5	24
41	MurNAc(AlaGlu-D-OrnGlyGly)-200	200		1079.5	118		38	315		83	277		260.5	478		46	208		42	35		26.5	29		25	25
42	MurNgly(AlaGlnLysGly)-200	200		133	148.5		124.5	2505.5		71	253		303.5	538		60	270.5		39	31		26	25.5		23.5	24.5
43	MurNgly(AlaGluOrnGlyGly)-200	200		511	906		213.5	364.5		375.5	364.5		423.5	1008.5		90.5	185.5		53	49.5		25.5	31.5		25	24
44	GlcNAc-anhMurNAc(AlaGlnLysGlyGly)-200	200		706.5	708.5		186.5	505.5		239.5	447.5		382	878.5		77	196.5		63.5	52		29.5	30		24	23.5
45	GlcNAc-anhMurNAc(AlaGluOrnGlyGly)-200	200		9121.5	9060.5		8825	2683.5		886	728		3095	1269		99.5	281		59.5	36.5		27.5	29		24	23.5
46	L-Ala-D-isoGln-L-Lys-200	200		1337.5	658.5		261.5	933		268.5	592		583	1138		165.5	303.5		73.5	42		30	27		24.5	24
47	L-Ala-D-isoGln-L-Lys-GlyGly-200	200		3185.5	8205.5		771.5	3266.5		351.5	1384.5		2186.5	3551.5		192.5	476.5		101.5	105		28	27		24.5	24
48	L-Ala-D-isoGln-L-Lys-Gly-200	200		3513.5	6073		61.5	3073.5		232.5	1391		2159.5	4189		240.5	847		264	218.5		27	28		24	24
49	L-Ala-D-Glu-L-Lys-200	200		202	233		49.5	1529.5		75	291.5		362	418.5		69	216.5		38.5	34		24.5	26		24	24
50	L-Ala-D-Glu-L-Orn-200	200		956	1056		284.5	1370.5		373	456		525.5	1054		101.5	236		69.5	57.5		28.5	29.5		23	25.5
51	L-Ala-D-Glu-L-Orn-Gly-200	200		1135	2092		306.5	1483.5		294	551		631	1310		98	226		79.5	45		28.5	29		23	24.5
52	L-Ala-D-Glu-L-Orn-GlyGly-200	200		675	270		148.5	550.5		268	642		624	1324.5		120.5	308.5		93	54.5		27.5	27		23.5	24.5
53	BG-A-200	200		2751	877.5		374	3099		826.5	1256.5		1312	5799		1051	2323		575.5	358.5		28.5	26		23	25
54	EZ-Link Amine-PEG-Biotin -200	0		1858.5	1106.5		350	1204		286	690.5		853	1656.5		464.5	582		282.5	181		28.5	26		24	24.5
55	blank2	0		1821.5	284		40.5	1006.5		134.5	432		468	1061.5		82	304		51.5	45		28	27.5		23	24.5
56	6-amino MDP-50	50		211.5	111		52.5	2148.5		122.5	247		187	310.5		54	142.5		32.5	34.5		48.5	62.5		40	24.5
57	1-PEG MDP-50	50		516.5	390.5		238.5	627		262	448.5		416.5	1234		102.5	242		57	54		29	29		26	25
58	1-C3-MDP-50	50		575.5	178.5		200.5	478.5		220.5	511.5		556.5	1193		91.5	281.5		53	38.5		30	27		25	26
59	6-C3-MDP-50	50		2051.5	1001.5		239.5	736.5		237.5	610		513	1230		112.5	249.5		84.5	39		30.5	26.5		25	25
60	6-PEG-MDP-50	50		2093.5	279		192	787.5		322	702		610.5	1359		166.5	323.5		53.5	46		30	26.5		24.5	25.5
61	D-iso-Gln-C3-MDP-50	50		2318	346		305.5	932.5		177.5	433		383	1133.5		148	300		54	42		31	27		25	24.5
62	D-iso-Gln-PEG-MDP-50	50		2021.5	255.5		50.5	778		169	391		311	1072.5		72	276		51	40		29	27.5		24.5	25
63	6-PEG MDP-50	50		150.5	159		56.5	2771.5		77	266.5		168.5	430.5		49	189.5		34.5	32.5		25.5	25		24	24.5
64	MurNAc(AlaGlnOrn)-NH2-50	50		964.5	285.5		262.5	593		290	547		743	1166.5		86.5	270		58	37.5		29.5	29.5		24.5	24.5
65	MurNAc(AlaGlnLys)-OH-50	50		579.5	854.5		220.5	896		256.5	563.5		701.5	1345		80	332		54	39		31	29.5		25	24.5
66	MurNAc(AlaGlnLys)-50	50		2984	2916.5		428	922		281.5	636		708	1085		81.5	369		77	43		27	28.5		25.5	24
67	MurNAc(AlaGluLys)-50	50		2735	1236		306.5	1080		270.5	707.5		594.5	1505		166	312		64	41		32	27		25	24.5
68	1-C3-GlcNAc-50	50		1582.5	432		423.5	915.5		208.5	625.5		590	1690.5		117	307		78	57		32	29.5		27	25
69	1-PEG-GlcNAc-50	50		2282.5	672		102.5	926.5		165	445		406.5	1172		96	356.5		65	42		34	33		27.5	24.5
70	6-C3-GlcNAc-50	50		201.5	300		56.5	1192.5		71	309		278.5	538		66	191		49.5	38.5		29	30		25.5	24.5
71	6-PEG-GlcNAc-50	50		875	501		356	602		273	660		506.5	1465		93.5	309.5		70	40		28.5	30.5		24.5	25.5
72	6-amino GlcNAC-50	50		794	342		476.5	661		283	554		710.5	1428		98	357.5		56	40		28.5	28.5		24.5	26
73	MeHNO-PEG3-NH2-50	50		830.5	1949		296.5	1070		269.5	621.5		796	1475		126.5	529.5		122.5	45.5		31	27.5		25	26
74	MeHNO-short-NH2-50	50		1100	1708.5		329	967		261.5	586		697	1440.5		127.5	397		75.5	42.5		40	33		27	25.5
75	Ethanolamine-50	50		2384	1639		461.5	1105.5		219.5	557.5		674	1291		126.5	307		65	42.5		45.5	35.5		28.5	26
76	C3-linker on 6-50	50		2264	784.5		162	887.5		177	508		582	1141.5		98	345		61.5	47.5		30	27.5		24.5	24.5
77	PEG4-linker on 6-50	50		216	260.5		56	2429		89.5	347.5		433	561		75.5	217.5		56.5	41.5		26	26.5		24	24
78	MurNAc(AlaGluOrnGly)-50	50		1156	1763		433	2701		279.5	491		726.5	1869.5		86.5	414		52.5	51.5		30.5	29		25	25
79	GlcNAc-MurNAc(AlaGluOrnGly)-50	50		10761	2486		335.5	994		320.5	1941.5		1104	1376.5		131	458		60	42.5		31	28		25	25.5
80	anhMurNAc(AlaGluOrnGly)-50	50		712	545		266	320.5		246	458.5		385.5	827.5		88.5	274.5		48	41		29.5	27		25	25
81	anhMurNAc(AlaGluOrn)-50	50		468	514.5		149	526.5		149.5	378.5		676	678		74	222.5		51.5	30.5		30.5	26		26	24.5
82	D-lactic acid-AlaGluOrnGly-50	50		2595.5	2241		518	1003.5		171	456.5		791.5	1403		92.5	286.5		58.5	39.5		29.5	26		26	26
83	1-C3-N-glycolyl MDP-50	50		2258	1326.5		925	973		165.5	472		851	946.5		88.5	319		61.5	41.5		29.5	27.5		26.5	24.5
84	GlcNAc-MurNAc(AlaGlnLys)-50	50		14488	14337.5		16655	17761		16966.5	19180		22816	18853.5		2641	5357.5		1104	2108		26.5	26		25.5	24
85	IE-dap-50	50		668.5	2134		457.5	1039		312.5	506		867.5	1243.5		120.5	540		58	43		28	27.5		25	24.5
86	M-Tridap-50	50		6961.5	5123.5		553	687.5		307	1027		2183	1385.5		81	404		67.5	43		29	26.5		23.5	25
87	MurNAc(AlaGluOrnGlyGly)-50	50		1423.5	1174.5		161.5	710		187.5	385.5		945.5	661.5		76.5	279		43	34.5		31	26.5		24.5	24
88	MurNAc(AlaGlnLysGly)-50	50		1429.5	2649.5		359	1091.5		229	499.5		1231	1331		115.5	429		61.5	44		31	26		26.5	23.5
89	MurNAc(AlaGlnLysGlyGly)-50	50		1981.5	1750		182	1226.5		170.5	560.5		2239.5	1021.5		86	296		80	39.5		30.5	27		25	25.5
90	MurNAc(AlaGlu-D-OrnGlyGly)-50	50		2151	446		265.5	577		122	320.5		290.5	349		64	267		44	31.5		28	27		25	25
91	MurNgly(AlaGlnLysGly)-50	50		240.5	985		73.5	381		200	363.5		1053.5	650.5		58.5	244.5		42	34.5		25.5	26		24	23.5
92	MurNgly(AlaGluOrnGlyGly)-50	50		1057	2796		328.5	755.5		304	655.5		758	523.5		95	569.5		51.5	37		29.5	29		25	25
93	GlcNAc-anhMurNAc(AlaGlnLysGlyGly)-50	50		838	2638.5		114	600.5		249.5	426		1110	991.5		96.5	570		42.5	38.5		29	27.5		25	25.5
94	GlcNAc-anhMurNAc(AlaGluOrnGlyGly)-50	50		8066	5217.5		267	1594		426.5	763.5		7641	1309.5		102	514.5		57	40.5		30	27		24.5	25.5
95	L-Ala-D-isoGln-L-Lys-50	50		1303	3714.5		268	720.5		242	511		1662	1111		106.5	501		68	41.5		32	26.5		25	25
96	L-Ala-D-isoGln-L-Lys-GlyGly-50	50		2827.5	6280.5		971	1566		224.5	575		4129	2415.5		166.5	645.5		111.5	58		28.5	27		25.5	24.5
97	L-Ala-D-isoGln-L-Lys-Gly-50	50		2739.5	5885		568.5	1353.5		207	835.5		3243.5	1280		155	530		234.5	72.5		29.5	26.5		25.5	24.5
98	L-Ala-D-Glu-L-Lys-50	50		912.5	756		104	528.5		125.5	362.5		1191.5	597		60.5	252		49.5	34.5		26.5	25		24.5	24
99	L-Ala-D-Glu-L-Orn-50	50		1007.5	2725		511.5	737		424.5	938.5		1087	991.5		93.5	402		52	38		26.5	29		25	24.5
100	L-Ala-D-Glu-L-Orn-Gly-50	50		1253.5	2901.5		285.5	892		257.5	687.5		1357	1303		121.5	639		53	42.5		28	27.5		25	25
101	L-Ala-D-Glu-L-Orn-GlyGly-50	50		988.5	1116.5		88.5	556.5		223.5	441		1427	1477.5		94	621		50.5	42.5		28	27		25	25
102	BG-A-50	50		681	306.5		118.5	1216.5		439.5	1250.5		4657.5	3678		1319	1660.5		591.5	205		29	26.5		25	24.5
103	EZ-Link Amine-PEG-Biotin -2	2		1839	3674.5		248	462.5		239	549		2683	779		237	455.5		244.5	50.5		28	28		25.5	24
104	Blank-50	50		2502.5	4662.5		385	344.5		141	383		1121.5	558.5		71	624.5		74.5	38.5		27	26.5		25.5	24.5
105	6-amino MDP-100	100		472.5	221		76.5	340.5		108	273		934.5	580.5		50.5	304		38	29.5		27.5	29		27.5	24.5
106	1-PEG MDP-100	100		402.5	838		108.5	130.5		224.5	422.5		191.5	581		64	148		36.5	32		27	27.5		24	23
107	1-C3-MDP-100	100		539	1648		69	192.5		522.5	421		575.5	889		73	236.5		35	32.5		27.5	27.5		24	24
108	6-C3-MDP-100	100		916	734		147	444		218.5	573.5		863.5	1291.5		64.5	476		36.5	37		28.5	27		24.5	24
109	6-PEG-MDP-100	100		1042.5	1305.5		133.5	331.5		163	406		731.5	732.5		63.5	368		36.5	34.5		29.5	27		24.5	24
110	D-iso-Gln-C3-MDP-100	100		1362.5	458		93	156.5		92.5	457		542	473		50.5	248.5		34	31		30	26.5		25	24
