# Supplementary material for: PGLYRP-1 mediated intracellular peptidoglycan detection promotes mucosal protection
Source: Research Square preprint supplement (doi:10.21203/rs.3.rs-5118704/v1), 2024-10-14
Supplement: Supplementary file 14 [file cb348fa0277186cea5cc6031.xlsx]

## Sheet: Sheet1
GeneID	GeneSymbol	logFC	AveExpr	t	P.Value	adj.P.Val	B	Contrast
ENSMUSG00000086503.4	Xist	-15.9549	1.33992	-78.1108	4.59245955757034e-18	1.02471550108067e-13	25.4156	NOD2_GMTP-WT_GMTP
ENSMUSG00000023951.18	Vegfa	4.28735	3.65091	61.2428	9.28942386422362e-17	9.93220561254658e-13	27.2768	NOD2_GMTP-WT_GMTP
ENSMUSG00000005800.3	Mmp8	3.13533	6.28892	59.4694	1.3353926786017e-16	9.93220561254658e-13	27.8725	NOD2_GMTP-WT_GMTP
ENSMUSG00000040026.8	Saa3	-4.13602	5.4037	-54.1636	4.233356879197e-16	2.36147230113807e-12	26.834	NOD2_GMTP-WT_GMTP
ENSMUSG00000069045.11	Ddx3y	7.68043	3.47249	50.5986	9.80663454287323e-16	4.37630873110261e-12	25.5142	NOD2_GMTP-WT_GMTP
ENSMUSG00000070323.11	Mmp27	2.80437	4.31455	49.0302	1.44603365356786e-15	5.37755815200995e-12	25.5952	NOD2_GMTP-WT_GMTP
ENSMUSG00000021250.13	Fos	-2.62175	5.6056	-44.18	5.22056978776508e-15	1.66409390963432e-11	24.7202	NOD2_GMTP-WT_GMTP
ENSMUSG00000035493.10	Tgfbi	-2.66238	8.67405	-41.5704	1.10481867860285e-14	3.08147739695818e-11	24.1385	NOD2_GMTP-WT_GMTP
ENSMUSG00000018927.3	Ccl6	2.28431	8.49202	40.9417	1.33272478044047e-14	3.30412089177425e-11	23.9617	NOD2_GMTP-WT_GMTP
ENSMUSG00000072844.6	G530011O06Rik	-5.52781	1.53201	-40.1111	1.71498705241537e-14	3.82665061005441e-11	21.9493	NOD2_GMTP-WT_GMTP
ENSMUSG00000000957.11	Mmp14	-2.91607	6.32816	-38.7163	2.65036722466746e-14	5.02635244661657e-11	23.2759	NOD2_GMTP-WT_GMTP
ENSMUSG00000031443.7	F7	2.66227	5.56052	38.6543	2.70318779901398e-14	5.02635244661657e-11	23.2252	NOD2_GMTP-WT_GMTP
ENSMUSG00000027848.12	Olfml3	-3.50137	3.96807	-36.9698	4.67428192186236e-14	8.02286557865499e-11	22.5456	NOD2_GMTP-WT_GMTP
ENSMUSG00000026548.4	Slamf9	-1.65493	6.27603	-36.7413	5.04424207674064e-14	8.03944096130813e-11	22.6687	NOD2_GMTP-WT_GMTP
ENSMUSG00000035042.2	Ccl5	-2.52589	7.52066	-34.3267	1.16217280643811e-13	1.72877078867024e-10	21.8878	NOD2_GMTP-WT_GMTP
ENSMUSG00000052336.7	Cx3cr1	-5.1339	3.42978	-33.6406	1.48881299963788e-13	2.02523167976238e-10	21.3888	NOD2_GMTP-WT_GMTP
ENSMUSG00000021591.8	Glrx	-1.74174	5.73424	-33.5427	1.54299908376106e-13	2.02523167976238e-10	21.5878	NOD2_GMTP-WT_GMTP
ENSMUSG00000039809.10	Gabbr2	3.3896	2.30602	33.3216	1.67339120362399e-13	2.0743543292479e-10	20.8573	NOD2_GMTP-WT_GMTP
ENSMUSG00000028459.11	Cd72	-1.77871	9.54059	-33.0042	1.88171130627909e-13	2.20982233563186e-10	21.4247	NOD2_GMTP-WT_GMTP
ENSMUSG00000056498.13	Tmem154	1.82905	5.64089	32.3333	2.42040259903926e-13	2.5563060640173e-10	21.1515	NOD2_GMTP-WT_GMTP
ENSMUSG00000068457.14	Uty	8.37714	2.34766	32.3146	2.43764421830157e-13	2.5563060640173e-10	20.5712	NOD2_GMTP-WT_GMTP
ENSMUSG00000038776.13	Ephx1	1.83623	5.58939	32.2266	2.52044697747415e-13	2.5563060640173e-10	21.1111	NOD2_GMTP-WT_GMTP
ENSMUSG00000039942.15	Ptger4	-1.7686	5.25954	-31.979	2.77026237707794e-13	2.68751584433652e-10	21.0113	NOD2_GMTP-WT_GMTP
ENSMUSG00000018339.11	Gpx3	1.90205	5.14526	31.6517	3.14240158963378e-13	2.91534492675946e-10	20.8861	NOD2_GMTP-WT_GMTP
ENSMUSG00000076431.4	Sox4	1.73153	4.40945	31.507	3.32377219603772e-13	2.91534492675946e-10	20.7957	NOD2_GMTP-WT_GMTP
ENSMUSG00000069049.11	Eif2s3y	8.0413	3.08128	31.451	3.39707650677837e-13	2.91534492675946e-10	20.5613	NOD2_GMTP-WT_GMTP
ENSMUSG00000016283.13	H2-M2	-2.33523	5.87325	-31.3396	3.54789767374509e-13	2.93200891830645e-10	20.784	NOD2_GMTP-WT_GMTP
ENSMUSG00000079293.11	Clec7a	1.59136	10.4974	31.2419	3.68624299586964e-13	2.9375407131014e-10	20.7614	NOD2_GMTP-WT_GMTP
ENSMUSG00000001348.15	Acp5	1.93754	5.92145	31.0688	3.94570054627332e-13	3.0110634313573e-10	20.6808	NOD2_GMTP-WT_GMTP
ENSMUSG00000047945.6	Marcksl1	-3.14768	4.22583	-31.0037	4.04839792680138e-13	3.0110634313573e-10	20.594	NOD2_GMTP-WT_GMTP
ENSMUSG00000028238.6	Atp6v0d2	1.46778	9.48828	30.7511	4.47479695746815e-13	3.22084337135441e-10	20.5689	NOD2_GMTP-WT_GMTP
ENSMUSG00000021990.16	Spata13	-1.55926	4.79956	-30.1349	5.73266278506256e-13	3.94133825669403e-10	20.2934	NOD2_GMTP-WT_GMTP
ENSMUSG00000025950.16	Idh1	1.27178	8.69921	30.0939	5.82907553761946e-13	3.94133825669403e-10	20.3056	NOD2_GMTP-WT_GMTP
ENSMUSG00000020034.7	Tcp11l2	1.77139	5.56398	29.605	7.12200776980668e-13	4.67392233434401e-10	20.0976	NOD2_GMTP-WT_GMTP
ENSMUSG00000024600.8	Slc27a6	2.55173	3.21824	29.2033	8.41702198719246e-13	5.27308995093246e-10	19.7734	NOD2_GMTP-WT_GMTP
ENSMUSG00000043740.15	B430306N03Rik	1.40723	5.65688	29.1511	8.6030466059788e-13	5.27308995093246e-10	19.9125	NOD2_GMTP-WT_GMTP
ENSMUSG00000070348.5	Ccnd1	-2.63887	4.92799	-29.1124	8.74397562786273e-13	5.27308995093246e-10	19.8862	NOD2_GMTP-WT_GMTP
ENSMUSG00000033316.14	Galnt9	2.42773	3.76652	28.9947	9.18783256532075e-13	5.39495021131584e-10	19.7736	NOD2_GMTP-WT_GMTP
ENSMUSG00000022504.10	Ciita	1.74629	7.08642	28.4716	1.14769718533867e-12	6.48831613626206e-10	19.6296	NOD2_GMTP-WT_GMTP
ENSMUSG00000024164.15	C3	-2.42117	9.02234	-28.3894	1.18899078699453e-12	6.48831613626206e-10	19.5924	NOD2_GMTP-WT_GMTP
ENSMUSG00000059824.12	Dbp	2.95898	3.82146	28.3831	1.19222409172565e-12	6.48831613626206e-10	19.5315	NOD2_GMTP-WT_GMTP
ENSMUSG00000032470.17	Mras	1.91033	3.80969	28.3213	1.22435710169954e-12	6.50454285957662e-10	19.505	NOD2_GMTP-WT_GMTP
ENSMUSG00000064373.12	Selenop	1.50669	10.5915	28.0531	1.37527318562259e-12	7.13638850948762e-10	19.4455	NOD2_GMTP-WT_GMTP
ENSMUSG00000033207.7	Mamdc2	1.63846	7.23001	27.5747	1.69657557876002e-12	8.57251370232029e-10	19.2378	NOD2_GMTP-WT_GMTP
ENSMUSG00000056673.14	Kdm5d	8.20167	2.15378	27.5322	1.728871584298e-12	8.57251370232029e-10	18.8365	NOD2_GMTP-WT_GMTP
ENSMUSG00000022150.16	Dab2	-1.92856	7.03387	-27.4245	1.813542128383e-12	8.79686206752389e-10	19.1713	NOD2_GMTP-WT_GMTP
ENSMUSG00000048498.7	Cd300e	-3.54667	2.86716	-26.9547	2.23918582087123e-12	1.06304155789574e-09	18.8036	NOD2_GMTP-WT_GMTP
ENSMUSG00000021477.9	Ctsl	1.36648	10.9175	26.8086	2.39259651406835e-12	1.11220845871681e-09	18.8865	NOD2_GMTP-WT_GMTP
ENSMUSG00000053040.13	Aph1c	1.23838	7.36882	26.6599	2.56051779808762e-12	1.16597619650467e-09	18.823	NOD2_GMTP-WT_GMTP
ENSMUSG00000026012.2	Cd28	1.57443	6.80968	26.5059	2.74791708814585e-12	1.22628547975597e-09	18.7539	NOD2_GMTP-WT_GMTP
ENSMUSG00000031355.16	Arhgap6	1.61855	5.73806	26.3495	2.95350221432512e-12	1.2771716111919e-09	18.6858	NOD2_GMTP-WT_GMTP
ENSMUSG00000052270.7	Fpr2	-4.61489	1.34446	-26.2876	3.0392778922011e-12	1.2771716111919e-09	18.0237	NOD2_GMTP-WT_GMTP
ENSMUSG00000055782.9	Abcd2	1.80789	5.54887	26.2691	3.06548799184027e-12	1.2771716111919e-09	18.6491	NOD2_GMTP-WT_GMTP
ENSMUSG00000020593.16	Lpin1	1.75274	5.66169	26.2513	3.09090068589444e-12	1.2771716111919e-09	18.6404	NOD2_GMTP-WT_GMTP
ENSMUSG00000055994.15	Nod2	-2.71645	2.51163	-25.9935	3.4858519751102e-12	1.4141784567388e-09	18.3202	NOD2_GMTP-WT_GMTP
ENSMUSG00000035459.18	Stab2	2.95416	3.19921	25.8716	3.69140185941567e-12	1.47082588730611e-09	18.3904	NOD2_GMTP-WT_GMTP
ENSMUSG00000029650.10	Slc46a3	1.46502	6.61228	25.7134	3.97758115454405e-12	1.54448492222355e-09	18.3816	NOD2_GMTP-WT_GMTP
ENSMUSG00000034926.3	Dhcr24	-1.59668	4.84725	-25.6938	4.01470557473069e-12	1.54448492222355e-09	18.3807	NOD2_GMTP-WT_GMTP
ENSMUSG00000020661.15	Dnmt3a	1.31921	9.39409	25.6462	4.10654128303312e-12	1.55303823132743e-09	18.3384	NOD2_GMTP-WT_GMTP
ENSMUSG00000005667.8	Mthfd2	-1.89774	4.05316	-25.5282	4.34374057763761e-12	1.59548768565263e-09	18.2932	NOD2_GMTP-WT_GMTP
ENSMUSG00000030403.9	Vasp	-1.51042	7.49983	-25.5195	4.36179576143103e-12	1.59548768565263e-09	18.2832	NOD2_GMTP-WT_GMTP
ENSMUSG00000033192.5	Lpcat2	-1.7847	5.85089	-25.2783	4.89627662264786e-12	1.76210677872809e-09	18.1768	NOD2_GMTP-WT_GMTP
ENSMUSG00000035299.16	Mid1	-4.82081	1.85331	-25.191	5.10683233699597e-12	1.80871031643478e-09	17.7919	NOD2_GMTP-WT_GMTP
ENSMUSG00000049723.14	Mmp12	1.5136	10.1576	25.1091	5.31317956613474e-12	1.85239024467444e-09	18.0753	NOD2_GMTP-WT_GMTP
ENSMUSG00000035356.17	Nfkbiz	-2.21244	4.78728	-25.066	5.42558680065501e-12	1.86247874281562e-09	18.0802	NOD2_GMTP-WT_GMTP
ENSMUSG00000051043.16	Gprc5c	2.34162	3.43679	24.8658	5.98155521465324e-12	2.02221881067512e-09	17.9518	NOD2_GMTP-WT_GMTP
ENSMUSG00000086763.1	Plxna4os1	2.49221	1.53378	24.8022	6.17075873316863e-12	2.05504685989838e-09	17.5145	NOD2_GMTP-WT_GMTP
ENSMUSG00000029810.15	Tmem176b	-1.60563	6.55101	-24.7215	6.4200107169247e-12	2.07765387215093e-09	17.897	NOD2_GMTP-WT_GMTP
ENSMUSG00000044162.12	Tnip3	-1.41817	5.61527	-24.72	6.42486968038427e-12	2.07765387215093e-09	17.9045	NOD2_GMTP-WT_GMTP
ENSMUSG00000049598.9	Vsig8	2.62235	2.43599	24.6443	6.66904904471452e-12	2.12580701906736e-09	17.7109	NOD2_GMTP-WT_GMTP
ENSMUSG00000028111.4	Ctsk	1.72618	5.66184	24.5107	7.12474593340736e-12	2.23907684524111e-09	17.7996	NOD2_GMTP-WT_GMTP
ENSMUSG00000050578.10	Mmp13	1.62151	4.67857	24.4741	7.25519064660529e-12	2.24840373469033e-09	17.7901	NOD2_GMTP-WT_GMTP
ENSMUSG00000022351.14	Sqle	-1.73306	4.80434	-24.3669	7.65281486636066e-12	2.33914052209733e-09	17.7357	NOD2_GMTP-WT_GMTP
ENSMUSG00000003484.4	Cyp4f18	-3.88398	2.2108	-24.2945	7.93477032863439e-12	2.39254770733539e-09	17.5016	NOD2_GMTP-WT_GMTP
ENSMUSG00000001467.5	Cyp51	-1.68441	5.33076	-24.0272	9.0765233432011e-12	2.70032620475795e-09	17.5584	NOD2_GMTP-WT_GMTP
ENSMUSG00000006818.5	Sod2	-1.69091	6.5018	-23.9796	9.29772950865408e-12	2.72146127231096e-09	17.5208	NOD2_GMTP-WT_GMTP
ENSMUSG00000025993.10	Slc40a1	1.58748	6.62365	23.9531	9.4237482521861e-12	2.72146127231096e-09	17.5059	NOD2_GMTP-WT_GMTP
ENSMUSG00000030577.14	Cd22	1.22643	5.54945	23.9344	9.51346655493456e-12	2.72146127231096e-09	17.5082	NOD2_GMTP-WT_GMTP
ENSMUSG00000006800.14	Sulf2	1.66789	6.31052	23.8206	1.00804111811973e-11	2.84714195805134e-09	17.4405	NOD2_GMTP-WT_GMTP
ENSMUSG00000001542.7	Ell2	-1.65795	6.92741	-23.7723	1.03320083129415e-11	2.85732408460388e-09	17.4092	NOD2_GMTP-WT_GMTP
ENSMUSG00000032554.15	Trf	1.3071	8.83401	23.7646	1.03725743222747e-11	2.85732408460388e-09	17.3933	NOD2_GMTP-WT_GMTP
ENSMUSG00000020092.9	Pald1	-3.48961	2.65589	-23.7333	1.05399556563188e-11	2.86802476292002e-09	17.3256	NOD2_GMTP-WT_GMTP
ENSMUSG00000025498.15	Irf7	-1.49796	8.77935	-23.5834	1.13825107120193e-11	3.05997543996731e-09	17.2982	NOD2_GMTP-WT_GMTP
ENSMUSG00000023367.14	Tmem176a	-1.74214	5.14934	-23.4304	1.2318399998241e-11	3.27214832334229e-09	17.2519	NOD2_GMTP-WT_GMTP
ENSMUSG00000021728.8	Emb	1.17018	7.80247	23.306	1.31402251023185e-11	3.41101403668571e-09	17.1561	NOD2_GMTP-WT_GMTP
ENSMUSG00000030474.9	Siglece	-4.62223	1.69485	-23.305	1.31469191572165e-11	3.41101403668571e-09	16.9111	NOD2_GMTP-WT_GMTP
ENSMUSG00000023947.8	Nfkbie	-1.95328	4.27645	-23.2735	1.33647904508932e-11	3.4276847049515e-09	17.181	NOD2_GMTP-WT_GMTP
ENSMUSG00000027398.13	Il1b	-6.29924	0.441744	-23.15	1.4255706899148e-11	3.61463168228056e-09	16.3115	NOD2_GMTP-WT_GMTP
ENSMUSG00000024772.9	Ehd1	-1.73556	5.85943	-23.1202	1.44800449147856e-11	3.63026114813047e-09	17.0771	NOD2_GMTP-WT_GMTP
ENSMUSG00000000318.16	Clec10a	2.35246	1.81067	23.0726	1.48469207800868e-11	3.64397419681397e-09	16.8353	NOD2_GMTP-WT_GMTP
ENSMUSG00000018459.15	Slc13a3	-4.14609	1.92307	-23.069	1.48747872531119e-11	3.64397419681397e-09	16.8624	NOD2_GMTP-WT_GMTP
ENSMUSG00000038235.4	F11r	-2.75146	1.25708	-23.0396	1.51068624367967e-11	3.64397419681397e-09	16.6446	NOD2_GMTP-WT_GMTP
ENSMUSG00000037434.7	Slc30a1	1.06935	6.77764	23.0294	1.51879890782817e-11	3.64397419681397e-09	17.0168	NOD2_GMTP-WT_GMTP
ENSMUSG00000027452.11	Acss1	1.30011	5.20611	22.9237	1.60598489497896e-11	3.81216393209207e-09	16.982	NOD2_GMTP-WT_GMTP
ENSMUSG00000079227.10	Ccr5	1.21158	8.00707	22.8837	1.64032296354827e-11	3.8526869774371e-09	16.927	NOD2_GMTP-WT_GMTP
ENSMUSG00000030329.11	Pianp	1.38124	5.84232	22.7751	1.73770004523928e-11	4.03888553223166e-09	16.8914	NOD2_GMTP-WT_GMTP
ENSMUSG00000030560.17	Ctsc	-0.98522	8.07397	-22.6848	1.82338670318815e-11	4.19435335136466e-09	16.8178	NOD2_GMTP-WT_GMTP
ENSMUSG00000009585.18	Apobec3	-1.1401	5.79928	-22.5039	2.00912473717954e-11	4.54038804572692e-09	16.7438	NOD2_GMTP-WT_GMTP
ENSMUSG00000047250.13	Ptgs1	1.51092	4.48111	22.499	2.01451358637102e-11	4.54038804572692e-09	16.766	NOD2_GMTP-WT_GMTP
ENSMUSG00000018796.13	Acsl1	-1.90926	6.53424	-22.278	2.27030167106742e-11	5.06572411865273e-09	16.6078	NOD2_GMTP-WT_GMTP
ENSMUSG00000058258.14	Idi1	-1.76153	3.3571	-22.175	2.40133045749758e-11	5.30503826714293e-09	16.5923	NOD2_GMTP-WT_GMTP
ENSMUSG00000033857.12	Engase	1.4909	5.58078	22.0157	2.62031943133862e-11	5.73207720308418e-09	16.4763	NOD2_GMTP-WT_GMTP
ENSMUSG00000008496.19	Pou2f2	-1.3036	6.46908	-21.9917	2.65511040227026e-11	5.75179401998605e-09	16.4479	NOD2_GMTP-WT_GMTP
ENSMUSG00000025591.6	Tma16	-2.54129	3.46769	-21.8055	2.94286842692846e-11	6.31386761635142e-09	16.394	NOD2_GMTP-WT_GMTP
ENSMUSG00000048120.16	Entpd1	1.1517	7.84957	21.7567	3.02367355122022e-11	6.42545028079778e-09	16.2985	NOD2_GMTP-WT_GMTP
ENSMUSG00000024190.7	Dusp1	-1.23874	5.08334	-21.7263	3.07522799605645e-11	6.47335493169883e-09	16.3234	NOD2_GMTP-WT_GMTP
ENSMUSG00000022106.14	Rcbtb2	1.27752	7.03943	21.6676	3.17756211625228e-11	6.62625640186328e-09	16.2556	NOD2_GMTP-WT_GMTP
ENSMUSG00000056153.15	Socs6	1.21377	6.51571	21.6049	3.29098834186442e-11	6.79924285852044e-09	16.2265	NOD2_GMTP-WT_GMTP
ENSMUSG00000073643.11	Wdfy1	1.67066	4.08513	21.5165	3.45819192965649e-11	7.07783386646731e-09	16.2289	NOD2_GMTP-WT_GMTP
ENSMUSG00000033863.2	Klf9	1.90171	4.49429	21.4852	3.5194894458303e-11	7.07783386646731e-09	16.2012	NOD2_GMTP-WT_GMTP
ENSMUSG00000038068.15	Rnf144b	1.18074	6.91632	21.4845	3.5209947527355e-11	7.07783386646731e-09	16.1514	NOD2_GMTP-WT_GMTP
ENSMUSG00000102418.1	Sh2d1b1	1.3536	3.94195	21.4309	3.62889543149941e-11	7.22960212170056e-09	16.1831	NOD2_GMTP-WT_GMTP
ENSMUSG00000028927.6	Padi2	1.30269	4.94121	21.3831	3.72807919526737e-11	7.36147177734521e-09	16.1305	NOD2_GMTP-WT_GMTP
ENSMUSG00000032193.9	Ldlr	-1.30268	6.59665	-21.2201	4.08938222304462e-11	8.00406890726268e-09	16.0017	NOD2_GMTP-WT_GMTP
ENSMUSG00000018476.7	Kdm6b	1.71977	3.47567	21.1568	4.2395632654523e-11	8.16355778561084e-09	16.0317	NOD2_GMTP-WT_GMTP
ENSMUSG00000029484.12	Anxa3	1.04911	6.91601	21.155	4.24404025962828e-11	8.16355778561084e-09	15.9588	NOD2_GMTP-WT_GMTP
ENSMUSG00000051439.7	Cd14	-1.45439	7.96153	-21.1095	4.35590886459666e-11	8.30712773467908e-09	15.9205	NOD2_GMTP-WT_GMTP
ENSMUSG00000040907.15	Atp1a3	1.24889	8.68726	21.0664	4.46472024303328e-11	8.4357593415556e-09	15.8899	NOD2_GMTP-WT_GMTP
ENSMUSG00000056999.15	Ide	-1.33544	6.12972	-21.0531	4.49897083155612e-11	8.4357593415556e-09	15.9111	NOD2_GMTP-WT_GMTP
ENSMUSG00000026807.8	Ak8	1.93751	3.33769	20.8936	4.93152925566715e-11	9.10021429216018e-09	15.8808	NOD2_GMTP-WT_GMTP
ENSMUSG00000047881.14	Rell1	1.00539	6.65123	20.8684	5.00402700268728e-11	9.10021429216018e-09	15.7927	NOD2_GMTP-WT_GMTP
ENSMUSG00000048031.15	Fcrl5	-3.8257	0.368487	-20.8646	5.01495750165099e-11	9.10021429216018e-09	15.2641	NOD2_GMTP-WT_GMTP
ENSMUSG00000026365.15	Cfh	1.49152	4.76574	20.846	5.06909019075423e-11	9.10021429216018e-09	15.8218	NOD2_GMTP-WT_GMTP
ENSMUSG00000027750.16	Postn	-2.46743	2.18653	-20.8415	5.08242308324352e-11	9.10021429216018e-09	15.7757	NOD2_GMTP-WT_GMTP
ENSMUSG00000036875.15	Dna2	1.09629	4.96529	20.8362	5.0980450254113e-11	9.10021429216018e-09	15.81	NOD2_GMTP-WT_GMTP
ENSMUSG00000025795.8	Rassf3	0.942155	7.36028	20.8129	5.16726411650803e-11	9.15056858981299e-09	15.7499	NOD2_GMTP-WT_GMTP
ENSMUSG00000049103.14	Ccr2	2.05092	3.61951	20.7944	5.22325643369381e-11	9.1768914019693e-09	15.8227	NOD2_GMTP-WT_GMTP
ENSMUSG00000028278.14	Rragd	1.12926	5.85785	20.7657	5.31082236991563e-11	9.25784215155684e-09	15.7456	NOD2_GMTP-WT_GMTP
ENSMUSG00000022180.7	Slc7a8	-1.11313	6.55179	-20.7086	5.49025925136926e-11	9.49644609889941e-09	15.6985	NOD2_GMTP-WT_GMTP
ENSMUSG00000053113.3	Socs3	-5.05455	1.11028	-20.6845	5.56795350382642e-11	9.55674973314453e-09	15.4615	NOD2_GMTP-WT_GMTP
ENSMUSG00000060147.15	Serpinb6a	1.01787	8.71516	20.6205	5.78011805962338e-11	9.8151890730828e-09	15.6222	NOD2_GMTP-WT_GMTP
ENSMUSG00000033949.12	Trim36	1.23173	4.54391	20.6127	5.80650274569502e-11	9.8151890730828e-09	15.6904	NOD2_GMTP-WT_GMTP
ENSMUSG00000006360.11	Crip1	1.26186	7.00436	20.5876	5.89264840160389e-11	9.88591457029983e-09	15.6186	NOD2_GMTP-WT_GMTP
ENSMUSG00000022126.6	Acod1	-3.7808	5.84823	-20.4792	6.27996757288336e-11	1.04570833174438e-08	15.5732	NOD2_GMTP-WT_GMTP
ENSMUSG00000022587.14	Ly6e	-1.04003	10.0819	-20.4593	6.35408624625077e-11	1.05021278824143e-08	15.52	NOD2_GMTP-WT_GMTP
ENSMUSG00000027995.10	Tlr2	-1.50492	6.51136	-20.4002	6.57963975375624e-11	1.07949633695267e-08	15.5122	NOD2_GMTP-WT_GMTP
ENSMUSG00000029189.10	Sel1l3	1.18332	5.2737	20.3055	6.95915274376329e-11	1.13342755599701e-08	15.4818	NOD2_GMTP-WT_GMTP
ENSMUSG00000022358.7	Fbxo32	1.69294	4.3578	20.261	7.1458719353488e-11	1.1554046412568e-08	15.4852	NOD2_GMTP-WT_GMTP
ENSMUSG00000038456.9	Dennd2a	1.15389	5.06258	20.2353	7.25577616294759e-11	1.16473477355288e-08	15.4453	NOD2_GMTP-WT_GMTP
ENSMUSG00000018427.8	Ypel2	1.54861	4.91139	20.1885	7.46103194242256e-11	1.18912861236625e-08	15.4216	NOD2_GMTP-WT_GMTP
ENSMUSG00000028266.17	Lmo4	-1.41226	6.0075	-20.0644	8.03639237963354e-11	1.27174484515435e-08	15.3152	NOD2_GMTP-WT_GMTP
ENSMUSG00000031604.10	Msmo1	-1.243	5.96556	-20.0091	8.30834294289902e-11	1.2982356376059e-08	15.2818	NOD2_GMTP-WT_GMTP
ENSMUSG00000034652.12	Cd300a	0.948283	8.40847	20.0067	8.3201584806007e-11	1.2982356376059e-08	15.2461	NOD2_GMTP-WT_GMTP
ENSMUSG00000036611.5	Eepd1	1.19331	5.96	19.9786	8.46202867680608e-11	1.31120309628871e-08	15.263	NOD2_GMTP-WT_GMTP
ENSMUSG00000030142.10	Clec4e	-3.78408	5.08841	-19.8997	8.87523887762193e-11	1.36574624190606e-08	15.2374	NOD2_GMTP-WT_GMTP
ENSMUSG00000032501.9	Trib1	-0.990773	4.46095	-19.8752	9.007664921283e-11	1.37663032457937e-08	15.2451	NOD2_GMTP-WT_GMTP
ENSMUSG00000019528.18	Gyg	0.882213	8.24593	19.8217	9.30515072030988e-11	1.41242059879098e-08	15.1311	NOD2_GMTP-WT_GMTP
ENSMUSG00000066621.12	Tecpr1	1.1702	8.20068	19.7743	9.57706140109146e-11	1.4438714259632e-08	15.1015	NOD2_GMTP-WT_GMTP
ENSMUSG00000028037.13	Ifi44	-1.7667	6.32089	-19.7451	9.74905066001506e-11	1.45993669380481e-08	15.1089	NOD2_GMTP-WT_GMTP
ENSMUSG00000066152.11	Slc31a2	-1.04233	7.03457	-19.6908	1.00775413481397e-10	1.49906786734027e-08	15.0622	NOD2_GMTP-WT_GMTP
ENSMUSG00000005237.14	Dnah2	3.47226	0.514259	19.6669	1.02258392665055e-10	1.51105398379826e-08	14.731	NOD2_GMTP-WT_GMTP
ENSMUSG00000039934.12	Gsap	-1.15228	5.5058	-19.6306	1.04556835392002e-10	1.53485307111957e-08	15.0559	NOD2_GMTP-WT_GMTP
ENSMUSG00000110631.1	Gm42047	-1.24524	4.78223	-19.6046	1.06238102775125e-10	1.54271561302104e-08	15.0632	NOD2_GMTP-WT_GMTP
ENSMUSG00000059089.4	Fcgr4	1.17376	7.33294	19.6009	1.06475240624408e-10	1.54271561302104e-08	15.0008	NOD2_GMTP-WT_GMTP
ENSMUSG00000050777.7	Tmem37	1.65444	4.92293	19.5604	1.09157457024991e-10	1.57137441199911e-08	15.0303	NOD2_GMTP-WT_GMTP
ENSMUSG00000075010.5	AW112010	-1.51689	5.03862	-19.4701	1.15407002840235e-10	1.65069003485524e-08	14.9687	NOD2_GMTP-WT_GMTP
ENSMUSG00000001228.14	Uhrf1	-1.57284	3.57271	-19.4066	1.20029783603267e-10	1.70587551690426e-08	14.9873	NOD2_GMTP-WT_GMTP
ENSMUSG00000055407.14	Map6	1.95789	3.27185	19.3742	1.22463656814444e-10	1.71870176508611e-08	14.9742	NOD2_GMTP-WT_GMTP
ENSMUSG00000029661.16	Col1a2	-1.47064	4.26614	-19.3741	1.22472809863618e-10	1.71870176508611e-08	14.9391	NOD2_GMTP-WT_GMTP
ENSMUSG00000036526.8	Card11	1.35042	5.68205	19.3551	1.23929016154594e-10	1.72826758591091e-08	14.8753	NOD2_GMTP-WT_GMTP
ENSMUSG00000056220.14	Pla2g4a	-1.30903	4.35733	-19.3087	1.27551964820232e-10	1.76774347269183e-08	14.8934	NOD2_GMTP-WT_GMTP
ENSMUSG00000024659.15	Anxa1	0.914595	11.3353	19.2719	1.30508472368479e-10	1.78847145693474e-08	14.7732	NOD2_GMTP-WT_GMTP
ENSMUSG00000030161.8	Gabarapl1	1.0247	7.01521	19.2702	1.30650673365465e-10	1.78847145693474e-08	14.7929	NOD2_GMTP-WT_GMTP
ENSMUSG00000076441.9	Ass1	-1.45716	5.94124	-19.2094	1.35707828485018e-10	1.8463712054794e-08	14.7747	NOD2_GMTP-WT_GMTP
ENSMUSG00000024401.14	Tnf	-2.88015	3.55851	-19.199	1.36595339841984e-10	1.84655806047868e-08	14.8572	NOD2_GMTP-WT_GMTP
ENSMUSG00000025355.7	Mmp19	1.1603	5.14825	19.1899	1.37376703284839e-10	1.84655806047868e-08	14.7853	NOD2_GMTP-WT_GMTP
ENSMUSG00000038712.16	Mindy1	1.07635	6.5626	19.1772	1.3847215306148e-10	1.85013721632383e-08	14.7403	NOD2_GMTP-WT_GMTP
ENSMUSG00000016349.10	Eef1a2	2.64911	3.67585	19.0659	1.48498277220021e-10	1.97228694024424e-08	14.7684	NOD2_GMTP-WT_GMTP
ENSMUSG00000020868.15	Xylt2	-1.09393	7.82252	-19.0539	1.49628066533166e-10	1.97450550267936e-08	14.6409	NOD2_GMTP-WT_GMTP
ENSMUSG00000022051.15	Bnip3l	0.918956	7.48221	19.0453	1.50435143394206e-10	1.97450550267936e-08	14.6395	NOD2_GMTP-WT_GMTP
ENSMUSG00000028494.12	Plin2	0.950455	10.1093	19.0043	1.54388510253341e-10	2.01454434460983e-08	14.5961	NOD2_GMTP-WT_GMTP
ENSMUSG00000045671.17	Spred2	-2.01939	3.03701	-18.9708	1.57687422907712e-10	2.04562759729057e-08	14.724	NOD2_GMTP-WT_GMTP
ENSMUSG00000030717.9	Nupr1	-2.20803	3.47706	-18.8182	1.73738668803416e-10	2.24082711965932e-08	14.617	NOD2_GMTP-WT_GMTP
ENSMUSG00000002944.15	Cd36	1.17853	9.31438	18.7834	1.7764878786552e-10	2.27537115292359e-08	14.4513	NOD2_GMTP-WT_GMTP
ENSMUSG00000033720.12	Sfxn5	-1.81093	3.70868	-18.7763	1.78456483557401e-10	2.27537115292359e-08	14.5806	NOD2_GMTP-WT_GMTP
ENSMUSG00000103847.1	Gm20056	1.33247	3.55714	18.7407	1.8255938483381e-10	2.31445883738455e-08	14.5639	NOD2_GMTP-WT_GMTP
ENSMUSG00000071324.11	Armc2	1.61616	3.19015	18.7304	1.83765190960594e-10	2.31658344966312e-08	14.5689	NOD2_GMTP-WT_GMTP
ENSMUSG00000029915.14	Clec5a	-1.31623	4.93402	-18.6775	1.90108679541839e-10	2.38308705989722e-08	14.458	NOD2_GMTP-WT_GMTP
ENSMUSG00000024770.14	Lipn	1.76751	3.20365	18.617	1.97654458779845e-10	2.46383460265624e-08	14.4954	NOD2_GMTP-WT_GMTP
ENSMUSG00000017466.9	Timp2	0.964691	8.87208	18.5963	2.00311113896413e-10	2.48278695892013e-08	14.328	NOD2_GMTP-WT_GMTP
ENSMUSG00000040229.11	Gpr34	3.43082	0.944663	18.5805	2.02367283231888e-10	2.48278695892013e-08	14.2658	NOD2_GMTP-WT_GMTP
ENSMUSG00000022895.16	Ets2	-1.32805	4.16028	-18.5739	2.03230213513369e-10	2.48278695892013e-08	14.4257	NOD2_GMTP-WT_GMTP
ENSMUSG00000034168.7	Irf2bpl	-1.30793	6.06358	-18.5709	2.03625695102578e-10	2.48278695892013e-08	14.3506	NOD2_GMTP-WT_GMTP
ENSMUSG00000028328.13	Tmod1	2.08733	1.7973	18.5478	2.06688096058548e-10	2.50643015617086e-08	14.3972	NOD2_GMTP-WT_GMTP
ENSMUSG00000037759.6	Ptger2	1.81347	3.13788	18.5164	2.10926586374579e-10	2.54400266041945e-08	14.4317	NOD2_GMTP-WT_GMTP
ENSMUSG00000000555.8	Itga5	-0.986682	7.29359	-18.4379	2.2194063840814e-10	2.66245240043055e-08	14.237	NOD2_GMTP-WT_GMTP
ENSMUSG00000037337.11	Map4k1	1.28928	5.01248	18.4035	2.26969077793038e-10	2.70682182047703e-08	14.2715	NOD2_GMTP-WT_GMTP
ENSMUSG00000002870.8	Mcm2	-0.995895	4.34731	-18.3961	2.28065478532551e-10	2.70682182047703e-08	14.2977	NOD2_GMTP-WT_GMTP
ENSMUSG00000022389.15	Tef	0.954407	6.44031	18.3725	2.31597196523098e-10	2.72272199903609e-08	14.2081	NOD2_GMTP-WT_GMTP
ENSMUSG00000036390.8	Gadd45a	1.49834	5.30853	18.3709	2.31845641472172e-10	2.72272199903609e-08	14.2383	NOD2_GMTP-WT_GMTP
ENSMUSG00000030126.17	Tmcc1	1.15088	5.44978	18.3488	2.35205794570324e-10	2.73560604256602e-08	14.2185	NOD2_GMTP-WT_GMTP
ENSMUSG00000030605.15	Mfge8	1.11743	10.5705	18.3476	2.35394774424181e-10	2.73560604256602e-08	14.1559	NOD2_GMTP-WT_GMTP
ENSMUSG00000018920.11	Cxcl16	-0.96118	7.86663	-18.3321	2.37789437952604e-10	2.74911695804997e-08	14.1575	NOD2_GMTP-WT_GMTP
ENSMUSG00000096768.8	Gm47283	-3.192	1.37829	-18.3233	2.39163010503224e-10	2.75074446049404e-08	14.2011	NOD2_GMTP-WT_GMTP
ENSMUSG00000020042.15	Btbd11	-2.06816	2.63655	-18.2775	2.46434563049351e-10	2.81984328477957e-08	14.279	NOD2_GMTP-WT_GMTP
ENSMUSG00000090231.10	Cfb	-3.18919	1.89239	-18.247	2.51414415791715e-10	2.86214788753088e-08	14.2202	NOD2_GMTP-WT_GMTP
ENSMUSG00000004709.14	Cd244a	-2.0062	1.91496	-18.2168	2.56455511746867e-10	2.90471666680601e-08	14.2032	NOD2_GMTP-WT_GMTP
ENSMUSG00000060550.16	H2-Q7	-1.64764	5.39641	-18.174	2.63773033938749e-10	2.97250894256329e-08	14.1014	NOD2_GMTP-WT_GMTP
ENSMUSG00000047139.9	Cd24a	1.83766	3.68295	18.1124	2.74713637302767e-10	3.08024391413902e-08	14.1429	NOD2_GMTP-WT_GMTP
ENSMUSG00000068747.14	Sort1	1.14854	6.6457	18.0448	2.8729185968798e-10	3.20517163260895e-08	13.9793	NOD2_GMTP-WT_GMTP
ENSMUSG00000022529.11	Zfp263	-0.822907	6.28608	-18.0223	2.91614466607358e-10	3.22772354011699e-08	13.9716	NOD2_GMTP-WT_GMTP
ENSMUSG00000038893.12	Fam117a	1.60704	3.72252	18.0193	2.92206406625569e-10	3.22772354011699e-08	14.0778	NOD2_GMTP-WT_GMTP
ENSMUSG00000031838.8	Ifi30	1.04897	7.45047	17.918	3.12579264708449e-10	3.41701661667137e-08	13.8773	NOD2_GMTP-WT_GMTP
ENSMUSG00000061578.8	Ksr2	2.51773	4.34346	17.9163	3.12946807613306e-10	3.41701661667137e-08	13.9722	NOD2_GMTP-WT_GMTP
ENSMUSG00000024222.17	Fkbp5	-1.75802	2.67047	-17.9103	3.14205120756543e-10	3.41701661667137e-08	14.0385	NOD2_GMTP-WT_GMTP
ENSMUSG00000024589.18	Nedd4l	0.923203	5.95111	17.8985	3.16690168912388e-10	3.41701661667137e-08	13.8942	NOD2_GMTP-WT_GMTP
ENSMUSG00000027956.11	Tmem144	1.24246	4.18158	17.8929	3.17884113455957e-10	3.41701661667137e-08	13.9654	NOD2_GMTP-WT_GMTP
ENSMUSG00000047415.12	Gpr68	1.16361	3.91116	17.8878	3.18950158728398e-10	3.41701661667137e-08	13.9776	NOD2_GMTP-WT_GMTP
ENSMUSG00000027660.16	Skil	-1.32408	6.55691	-17.8826	3.20062955624218e-10	3.41701661667137e-08	13.8685	NOD2_GMTP-WT_GMTP
ENSMUSG00000041633.14	Kctd12b	1.66259	6.02384	17.8744	3.21824149048889e-10	3.41945820844184e-08	13.8755	NOD2_GMTP-WT_GMTP
ENSMUSG00000027955.16	Gask1b	1.09863	6.51179	17.813	3.35352297755362e-10	3.54631081507839e-08	13.8208	NOD2_GMTP-WT_GMTP
ENSMUSG00000066026.14	Dhrs3	0.978705	8.55747	17.7371	3.52912195005802e-10	3.70795283832695e-08	13.7382	NOD2_GMTP-WT_GMTP
ENSMUSG00000036594.15	H2-Aa	0.996729	10.1756	17.7327	3.53961347449308e-10	3.70795283832695e-08	13.729	NOD2_GMTP-WT_GMTP
ENSMUSG00000031304.18	Il2rg	-0.920275	6.1832	-17.6832	3.65987352221256e-10	3.81601672435182e-08	13.7374	NOD2_GMTP-WT_GMTP
ENSMUSG00000041827.15	Oasl1	-1.49625	4.89285	-17.5067	4.12594524618216e-10	4.28196354781687e-08	13.6578	NOD2_GMTP-WT_GMTP
ENSMUSG00000025372.16	Baiap2	1.24748	5.58393	17.4619	4.25412560218926e-10	4.39455113711338e-08	13.5982	NOD2_GMTP-WT_GMTP
ENSMUSG00000036944.6	Tmem71	1.17142	4.6893	17.4469	4.29786173080152e-10	4.41927137324305e-08	13.6257	NOD2_GMTP-WT_GMTP
ENSMUSG00000030047.14	Arhgap25	0.784829	8.18702	17.4323	4.34118128362969e-10	4.44333843952428e-08	13.5248	NOD2_GMTP-WT_GMTP
ENSMUSG00000018395.19	Kif3a	0.901674	5.84018	17.4171	4.38651141663095e-10	4.46923421183956e-08	13.558	NOD2_GMTP-WT_GMTP
ENSMUSG00000030259.12	Rassf8	1.31238	5.71837	17.4005	4.43678705331542e-10	4.49991043275577e-08	13.5499	NOD2_GMTP-WT_GMTP
ENSMUSG00000044786.6	Zfp36	-0.959783	6.60498	-17.3732	4.52063198851083e-10	4.56420188052679e-08	13.5071	NOD2_GMTP-WT_GMTP
ENSMUSG00000031803.8	B3gnt3	-1.11303	5.13797	-17.3342	4.64341166438867e-10	4.66704704808579e-08	13.5241	NOD2_GMTP-WT_GMTP
ENSMUSG00000073242.4	Dnmt3aos	1.39519	3.11605	17.2582	4.89354900632554e-10	4.89640174789874e-08	13.5846	NOD2_GMTP-WT_GMTP
ENSMUSG00000021273.11	Fdft1	-1.48271	3.8996	-17.2154	5.04050228537619e-10	5.02092533453566e-08	13.5088	NOD2_GMTP-WT_GMTP
ENSMUSG00000036438.14	Calm2	0.869372	9.36092	17.2002	5.09389697169667e-10	5.05156102797635e-08	13.3492	NOD2_GMTP-WT_GMTP
ENSMUSG00000039206.13	Daglb	0.871857	7.94953	17.1588	5.24259333089201e-10	5.17601703505281e-08	13.3298	NOD2_GMTP-WT_GMTP
ENSMUSG00000039735.16	Fnbp1l	-1.4243	6.49803	-17.1326	5.33900095981583e-10	5.24797922539078e-08	13.3356	NOD2_GMTP-WT_GMTP
ENSMUSG00000001930.17	Vwf	1.18567	7.10083	17.1213	5.38112955761578e-10	5.26619051838074e-08	13.3151	NOD2_GMTP-WT_GMTP
ENSMUSG00000063234.5	Gpr84	-5.22756	-0.301866	-17.0956	5.47817213455686e-10	5.33774911957936e-08	12.9831	NOD2_GMTP-WT_GMTP
ENSMUSG00000034641.2	Cd300ld	0.894236	7.84369	17.0807	5.53566075018721e-10	5.37031297038814e-08	13.2741	NOD2_GMTP-WT_GMTP
ENSMUSG00000021846.9	Peli2	1.38526	5.22684	17.0556	5.63338173896296e-10	5.44145656889526e-08	13.3192	NOD2_GMTP-WT_GMTP
ENSMUSG00000032870.8	Smap2	0.827973	7.14075	17.0463	5.67018322289584e-10	5.45339647639978e-08	13.2596	NOD2_GMTP-WT_GMTP
ENSMUSG00000000594.7	Gm2a	0.747391	9.29006	17.0291	5.73892611591856e-10	5.49582224997814e-08	13.2245	NOD2_GMTP-WT_GMTP
ENSMUSG00000031906.9	Smpd3	2.16037	2.23679	17.0182	5.78263139913545e-10	5.51401087217561e-08	13.4298	NOD2_GMTP-WT_GMTP
ENSMUSG00000076435.3	Acsf2	1.4944	3.9923	17.0025	5.84656438578804e-10	5.55125068681228e-08	13.3501	NOD2_GMTP-WT_GMTP
ENSMUSG00000034353.14	Ramp1	1.74301	3.09258	16.9503	6.0647733748611e-10	5.73403764039304e-08	13.3685	NOD2_GMTP-WT_GMTP
ENSMUSG00000045827.10	Serpinb9	-1.13891	3.88254	-16.9327	6.14064131670483e-10	5.78127129534325e-08	13.307	NOD2_GMTP-WT_GMTP
ENSMUSG00000101389.1	Ms4a4a	1.31779	6.48013	16.9178	6.20511743916449e-10	5.81742795882678e-08	13.1788	NOD2_GMTP-WT_GMTP
ENSMUSG00000005125.13	Ndrg1	0.962716	6.27854	16.8857	6.34710857280738e-10	5.92564994079712e-08	13.1601	NOD2_GMTP-WT_GMTP
ENSMUSG00000000386.16	Mx1	-1.13705	5.70478	-16.8719	6.40917864428142e-10	5.95866679541048e-08	13.1668	NOD2_GMTP-WT_GMTP
ENSMUSG00000027907.4	S100a11	0.842544	7.63938	16.8561	6.48121503620079e-10	5.98002668095964e-08	13.1116	NOD2_GMTP-WT_GMTP
ENSMUSG00000026107.11	Nabp1	0.998214	7.04088	16.8551	6.48575474742183e-10	5.98002668095964e-08	13.1207	NOD2_GMTP-WT_GMTP
ENSMUSG00000018930.3	Ccl4	-1.54003	4.05653	-16.8386	6.56179075558099e-10	6.02523609585509e-08	13.2268	NOD2_GMTP-WT_GMTP
ENSMUSG00000022463.8	Srebf2	-0.875706	7.18425	-16.8312	6.59627581571157e-10	6.03207796213001e-08	13.1004	NOD2_GMTP-WT_GMTP
ENSMUSG00000039474.13	Wfs1	1.11949	4.02386	16.8033	6.72767171545267e-10	6.12712404028144e-08	13.2033	NOD2_GMTP-WT_GMTP
ENSMUSG00000002289.16	Angptl4	1.60803	3.06597	16.7933	6.77550573397055e-10	6.14560404236117e-08	13.2575	NOD2_GMTP-WT_GMTP
ENSMUSG00000022419.16	Deptor	1.36237	5.07547	16.7497	6.98864077789485e-10	6.31326079664647e-08	13.1016	NOD2_GMTP-WT_GMTP
ENSMUSG00000017400.10	Stac2	1.05369	5.65853	16.7395	7.03968463638231e-10	6.32799126852131e-08	13.0704	NOD2_GMTP-WT_GMTP
ENSMUSG00000037405.8	Icam1	-1.49101	6.56083	-16.7351	7.06166730543542e-10	6.32799126852131e-08	13.0416	NOD2_GMTP-WT_GMTP
ENSMUSG00000062488.9	Ifit3b	-1.26702	5.58084	-16.7233	7.12092186338833e-10	6.35556518151135e-08	13.0613	NOD2_GMTP-WT_GMTP
ENSMUSG00000001281.10	Itgb7	1.28058	5.67436	16.7039	7.22040194237008e-10	6.41867842789257e-08	13.0434	NOD2_GMTP-WT_GMTP
ENSMUSG00000017417.14	Plxdc1	0.886285	5.94361	16.6795	7.34683148331726e-10	6.50515281298643e-08	13.0166	NOD2_GMTP-WT_GMTP
ENSMUSG00000027351.14	Spred1	-1.19678	6.66121	-16.6612	7.4432877028734e-10	6.56450903218238e-08	12.9843	NOD2_GMTP-WT_GMTP
ENSMUSG00000021025.8	Nfkbia	-1.52631	5.73379	-16.6343	7.58764060051072e-10	6.65409456259449e-08	12.9897	NOD2_GMTP-WT_GMTP
ENSMUSG00000007655.16	Cav1	-2.32908	1.55023	-16.6312	7.60450909094068e-10	6.65409456259449e-08	13.1274	NOD2_GMTP-WT_GMTP
ENSMUSG00000074794.10	Arrdc3	1.72132	5.96413	16.6205	7.66345281864633e-10	6.66808300419194e-08	12.9719	NOD2_GMTP-WT_GMTP
ENSMUSG00000041842.15	Fhdc1	2.04454	1.57545	16.6174	7.68026411543642e-10	6.66808300419194e-08	13.12	NOD2_GMTP-WT_GMTP
ENSMUSG00000035121.6	Neil2	1.65939	1.99581	16.5965	7.79612567067522e-10	6.7424400034797e-08	13.1294	NOD2_GMTP-WT_GMTP
ENSMUSG00000036887.5	C1qa	-0.951253	9.25579	-16.5648	7.97538005443758e-10	6.87083610635775e-08	12.8793	NOD2_GMTP-WT_GMTP
ENSMUSG00000024975.13	Pdcd4	1.02351	5.14286	16.5288	8.18409524525294e-10	7.02352758489726e-08	12.934	NOD2_GMTP-WT_GMTP
ENSMUSG00000034656.18	Cacna1a	2.08806	5.39276	16.4784	8.48711439001009e-10	7.23037039425548e-08	12.8853	NOD2_GMTP-WT_GMTP
ENSMUSG00000096255.2	Dynlt1b	1.14404	3.3618	16.4757	8.50343307606455e-10	7.23037039425548e-08	13.0091	NOD2_GMTP-WT_GMTP
ENSMUSG00000039031.16	Arhgap18	0.868901	6.76568	16.4726	8.52232964500153e-10	7.23037039425548e-08	12.8402	NOD2_GMTP-WT_GMTP
ENSMUSG00000004207.14	Psap	1.01822	14.2684	16.4639	8.57644222231436e-10	7.2487180040341e-08	12.8245	NOD2_GMTP-WT_GMTP
ENSMUSG00000073409.12	H2-Q6	-1.76642	5.34687	-16.4464	8.68515151841694e-10	7.31289757850706e-08	12.8631	NOD2_GMTP-WT_GMTP
ENSMUSG00000027227.7	Sord	0.859037	6.25862	16.4064	8.94006099528677e-10	7.49923236796367e-08	12.8023	NOD2_GMTP-WT_GMTP
ENSMUSG00000015854.7	Cd5l	0.847472	7.60434	16.399	8.98810638134662e-10	7.51129654258379e-08	12.7692	NOD2_GMTP-WT_GMTP
ENSMUSG00000037224.15	Zfyve28	1.45691	5.63302	16.366	9.20607056467347e-10	7.652330525613e-08	12.7911	NOD2_GMTP-WT_GMTP
ENSMUSG00000025154.15	Arhgap19	0.812985	7.81703	16.3631	9.22546009675927e-10	7.652330525613e-08	12.7389	NOD2_GMTP-WT_GMTP
ENSMUSG00000057406.16	Nsd2	-1.25515	5.76491	-16.348	9.32749507873659e-10	7.70831102562405e-08	12.7729	NOD2_GMTP-WT_GMTP
ENSMUSG00000022094.15	Slc39a14	-1.22378	3.77185	-16.3367	9.40385823592007e-10	7.73652268117502e-08	12.8763	NOD2_GMTP-WT_GMTP
ENSMUSG00000038644.14	Pold1	-0.799094	4.51163	-16.3328	9.4309782157469e-10	7.73652268117502e-08	12.8208	NOD2_GMTP-WT_GMTP
ENSMUSG00000002699.13	Lcp2	-0.854319	5.90591	-16.3107	9.58394012258148e-10	7.83320351484104e-08	12.7398	NOD2_GMTP-WT_GMTP
ENSMUSG00000071714.7	Csf2rb2	0.746071	9.4795	16.183	1.05210947171949e-09	8.56778052645149e-08	12.5874	NOD2_GMTP-WT_GMTP
ENSMUSG00000038816.14	Ctnnal1	4.3828	1.05784	16.1484	1.0791907804006e-09	8.75635777566491e-08	12.7416	NOD2_GMTP-WT_GMTP
ENSMUSG00000044456.16	Rin3	1.09095	5.87844	16.137	1.08828856935088e-09	8.7981821912776e-08	12.6077	NOD2_GMTP-WT_GMTP
ENSMUSG00000042613.9	Pbxip1	-0.839775	6.9518	-16.1295	1.09429561668398e-09	8.8148079765594e-08	12.5742	NOD2_GMTP-WT_GMTP
ENSMUSG00000007872.3	Id3	1.93732	2.55045	16.1137	1.10706470872471e-09	8.88558807401957e-08	12.7825	NOD2_GMTP-WT_GMTP
ENSMUSG00000020077.14	Srgn	0.933612	6.50418	16.1002	1.11816797059963e-09	8.94253832544431e-08	12.5616	NOD2_GMTP-WT_GMTP
ENSMUSG00000034116.17	Vav1	-0.737876	8.19218	-16.0709	1.14255118534171e-09	9.10490878518913e-08	12.5097	NOD2_GMTP-WT_GMTP
ENSMUSG00000026675.12	Hsd17b7	-1.86441	2.87762	-16.0489	1.16132400794631e-09	9.22157387519787e-08	12.7211	NOD2_GMTP-WT_GMTP
ENSMUSG00000024679.10	Ms4a6d	-0.953712	8.00888	-16.036	1.17247375026615e-09	9.26740989662856e-08	12.4847	NOD2_GMTP-WT_GMTP
ENSMUSG00000041936.18	Agrn	-1.33962	5.52187	-16.0326	1.1754031285555e-09	9.26740989662856e-08	12.5399	NOD2_GMTP-WT_GMTP
ENSMUSG00000026600.12	Soat1	0.723738	9.3188	16.0121	1.19336126530939e-09	9.36732860146113e-08	12.4556	NOD2_GMTP-WT_GMTP
ENSMUSG00000037196.6	Pacrg	2.08048	2.65051	16.0086	1.19647230377646e-09	9.36732860146113e-08	12.7012	NOD2_GMTP-WT_GMTP
ENSMUSG00000032038.7	St3gal4	0.852924	5.47714	15.9918	1.2114500903415e-09	9.45142862440204e-08	12.5101	NOD2_GMTP-WT_GMTP
ENSMUSG00000024675.19	Ms4a4c	-1.61076	6.41231	-15.9846	1.21794292298849e-09	9.46541003408483e-08	12.4743	NOD2_GMTP-WT_GMTP
ENSMUSG00000026355.11	Mcm6	-0.810384	5.84876	-15.9804	1.22172638812192e-09	9.46541003408483e-08	12.4876	NOD2_GMTP-WT_GMTP
ENSMUSG00000058317.12	Ube2e2	-1.59043	2.26077	-15.9534	1.24647921991306e-09	9.62376845464363e-08	12.6692	NOD2_GMTP-WT_GMTP
ENSMUSG00000109812.1	Gm45640	-4.98543	-0.842556	-15.9366	1.26216827905088e-09	9.71129683119391e-08	12.0496	NOD2_GMTP-WT_GMTP
ENSMUSG00000030795.18	Fus	-0.790007	6.51878	-15.9165	1.28112509834485e-09	9.82327983483461e-08	12.4186	NOD2_GMTP-WT_GMTP
ENSMUSG00000037995.15	Igsf9	-1.52838	2.7312	-15.9088	1.28851579688537e-09	9.84611403284355e-08	12.6231	NOD2_GMTP-WT_GMTP
ENSMUSG00000023341.15	Mx2	-1.20944	3.58391	-15.9035	1.29364753160263e-09	9.85158954697932e-08	12.5624	NOD2_GMTP-WT_GMTP
ENSMUSG00000112023.1	Lilr4b	-0.926506	8.37447	-15.8054	1.39204633474944e-09	1.05648741045117e-07	12.3002	NOD2_GMTP-WT_GMTP
ENSMUSG00000025203.6	Scd2	-1.15157	6.36167	-15.7902	1.40794030346187e-09	1.0649278641066e-07	12.3236	NOD2_GMTP-WT_GMTP
ENSMUSG00000005410.6	Mcm5	-1.26406	4.59114	-15.7371	1.46530499063794e-09	1.10108002101704e-07	12.3571	NOD2_GMTP-WT_GMTP
ENSMUSG00000045294.11	Insig1	-0.816294	5.91427	-15.7368	1.46560644575835e-09	1.10108002101704e-07	12.2948	NOD2_GMTP-WT_GMTP
ENSMUSG00000099876.1	Gm29650	6.52769	-3.40014	15.7295	1.47368521075898e-09	1.10343416468675e-07	9.90566	NOD2_GMTP-WT_GMTP
ENSMUSG00000049625.6	Tifab	0.66909	7.41978	15.7087	1.49696187740021e-09	1.11711405921173e-07	12.2365	NOD2_GMTP-WT_GMTP
ENSMUSG00000021483.8	Cdk20	0.897373	5.59788	15.6986	1.50840697999185e-09	1.12190283148527e-07	12.276	NOD2_GMTP-WT_GMTP
ENSMUSG00000034157.12	Cipc	0.786714	7.22166	15.6486	1.56649603056916e-09	1.16123674186344e-07	12.1923	NOD2_GMTP-WT_GMTP
ENSMUSG00000056529.7	Ptafr	0.690328	9.43939	15.6335	1.58440709004146e-09	1.17062501324818e-07	12.1569	NOD2_GMTP-WT_GMTP
ENSMUSG00000070034.13	Sp110	-0.796361	6.45273	-15.6225	1.59765093970637e-09	1.17651437022008e-07	12.1886	NOD2_GMTP-WT_GMTP
ENSMUSG00000030187.15	Klra2	-2.89769	0.837258	-15.5933	1.63344565960812e-09	1.19891687509329e-07	12.322	NOD2_GMTP-WT_GMTP
ENSMUSG00000098557.1	Kctd12	0.998415	8.97278	15.5745	1.65693152278784e-09	1.21216764157262e-07	12.1121	NOD2_GMTP-WT_GMTP
ENSMUSG00000059498.13	Fcgr3	0.79596	8.77502	15.5272	1.71769493585688e-09	1.24599595431202e-07	12.0756	NOD2_GMTP-WT_GMTP
ENSMUSG00000024030.7	Abcg1	0.743234	9.57558	15.5265	1.71852298375471e-09	1.24599595431202e-07	12.0709	NOD2_GMTP-WT_GMTP
ENSMUSG00000105504.4	Gbp5	-1.96243	4.85155	-15.5255	1.7199245010895e-09	1.24599595431202e-07	12.1741	NOD2_GMTP-WT_GMTP
ENSMUSG00000021640.6	Naip1	2.18953	0.809419	15.5135	1.73567523266888e-09	1.25333726428935e-07	12.2611	NOD2_GMTP-WT_GMTP
ENSMUSG00000042607.15	Asb4	3.43881	0.612677	15.4689	1.79578934233838e-09	1.29256282566439e-07	12.1991	NOD2_GMTP-WT_GMTP
ENSMUSG00000000732.9	Icosl	-1.98876	2.7776	-15.4507	1.82089336768197e-09	1.30641780427935e-07	12.2705	NOD2_GMTP-WT_GMTP
ENSMUSG00000027423.15	Snx5	0.67175	9.54278	15.43	1.85005675633278e-09	1.32308706423248e-07	11.9933	NOD2_GMTP-WT_GMTP
ENSMUSG00000022667.18	Cd200r1	0.730023	7.22711	15.4232	1.85973468359021e-09	1.32331418485077e-07	12.0118	NOD2_GMTP-WT_GMTP
ENSMUSG00000022747.17	St3gal6	-2.01398	0.774945	-15.4214	1.8622357103175e-09	1.32331418485077e-07	12.1902	NOD2_GMTP-WT_GMTP
ENSMUSG00000021670.14	Hmgcr	-0.906921	5.73667	-15.3656	1.94373507905085e-09	1.37684320059878e-07	12.0051	NOD2_GMTP-WT_GMTP
ENSMUSG00000062585.11	Cnr2	0.762341	5.79245	15.3511	1.9655577162406e-09	1.38789523172394e-07	11.9914	NOD2_GMTP-WT_GMTP
ENSMUSG00000035673.10	Sbno2	-0.923095	6.9428	-15.3053	2.03620057289434e-09	1.43324111618269e-07	11.9222	NOD2_GMTP-WT_GMTP
ENSMUSG00000036948.17	Map11	-1.04787	5.9899	-15.2944	2.05343076680632e-09	1.44082392137577e-07	11.9387	NOD2_GMTP-WT_GMTP
ENSMUSG00000035692.7	Isg15	-1.57592	6.17565	-15.2707	2.09125658165428e-09	1.46276514440288e-07	11.9137	NOD2_GMTP-WT_GMTP
ENSMUSG00000079625.2	Tm4sf19	1.33589	3.80473	15.2662	2.09857135455169e-09	1.463294457316e-07	12.0447	NOD2_GMTP-WT_GMTP
ENSMUSG00000048058.17	Ldlrad3	0.884531	5.13578	15.2437	2.13547786264654e-09	1.48438995480474e-07	11.9325	NOD2_GMTP-WT_GMTP
ENSMUSG00000031722.10	Hp	-1.44779	3.10504	-15.2351	2.14979247531317e-09	1.48969936340568e-07	12.079	NOD2_GMTP-WT_GMTP
ENSMUSG00000026104.14	Stat1	-0.800881	6.2195	-15.1589	2.28082831597188e-09	1.57009684394201e-07	11.8213	NOD2_GMTP-WT_GMTP
ENSMUSG00000104713.4	Gbp6	-2.32907	2.8281	-15.1559	2.28608571374517e-09	1.57009684394201e-07	12.0362	NOD2_GMTP-WT_GMTP
ENSMUSG00000028680.14	Plk3	-1.70992	1.59679	-15.1555	2.2869245474887e-09	1.57009684394201e-07	12.0617	NOD2_GMTP-WT_GMTP
ENSMUSG00000001506.10	Col1a1	-1.71142	3.95385	-15.1508	2.29526033553658e-09	1.5709860081849e-07	11.9388	NOD2_GMTP-WT_GMTP
ENSMUSG00000025044.16	Msr1	-0.891625	8.38554	-15.1135	2.36300692068918e-09	1.61240897312959e-07	11.7432	NOD2_GMTP-WT_GMTP
ENSMUSG00000050931.7	Sgms2	1.18145	3.55771	15.1052	2.37827844080065e-09	1.61788191614588e-07	11.9369	NOD2_GMTP-WT_GMTP
ENSMUSG00000033082.10	Clec1a	3.23174	1.76515	15.0851	2.41603154506629e-09	1.63856874969799e-07	12.0117	NOD2_GMTP-WT_GMTP
ENSMUSG00000024140.10	Epas1	1.27453	3.28176	15.0674	2.44970129750709e-09	1.65505383208204e-07	11.9305	NOD2_GMTP-WT_GMTP
ENSMUSG00000001552.14	Jup	1.35708	4.35363	15.0645	2.45517329995589e-09	1.65505383208204e-07	11.8361	NOD2_GMTP-WT_GMTP
ENSMUSG00000003228.9	Grk5	1.08005	4.47825	14.9954	2.59195794026881e-09	1.74199872051861e-07	11.7705	NOD2_GMTP-WT_GMTP
ENSMUSG00000070691.10	Runx3	-2.40564	0.217498	-14.9868	2.60962474089492e-09	1.74630671132235e-07	11.7808	NOD2_GMTP-WT_GMTP
ENSMUSG00000102037.1	Bcl2a1a	-2.45382	1.14967	-14.9847	2.6140207125069e-09	1.74630671132235e-07	11.9079	NOD2_GMTP-WT_GMTP
ENSMUSG00000020841.5	Cpd	-1.48901	7.43111	-14.9478	2.69105685646753e-09	1.79240452651821e-07	11.6194	NOD2_GMTP-WT_GMTP
ENSMUSG00000041313.14	Slc7a1	-1.3045	3.38913	-14.9316	2.72569178741656e-09	1.810070263471e-07	11.8113	NOD2_GMTP-WT_GMTP
ENSMUSG00000028559.17	Osbpl9	0.6912	7.34918	14.9228	2.74454480779967e-09	1.81718184855888e-07	11.6001	NOD2_GMTP-WT_GMTP
ENSMUSG00000074896.3	Ifit3	-1.1673	7.98333	-14.9084	2.77597678329103e-09	1.83255532442523e-07	11.5782	NOD2_GMTP-WT_GMTP
ENSMUSG00000034459.8	Ifit1	-1.4797	6.64997	-14.902	2.79004768684578e-09	1.83556620479751e-07	11.5978	NOD2_GMTP-WT_GMTP
ENSMUSG00000028957.12	Per3	1.40346	3.17609	14.8969	2.8013857578267e-09	1.83556620479751e-07	11.8019	NOD2_GMTP-WT_GMTP
ENSMUSG00000031586.17	Rbpms	1.81193	2.14084	14.8952	2.80521702969547e-09	1.83556620479751e-07	11.8613	NOD2_GMTP-WT_GMTP
ENSMUSG00000034165.16	Ccnd3	-1.13229	5.08951	-14.8897	2.81725730070712e-09	1.83805444885023e-07	11.6448	NOD2_GMTP-WT_GMTP
ENSMUSG00000030103.11	Bhlhe40	1.05881	6.03653	14.8695	2.86284450979048e-09	1.86235129874504e-07	11.5882	NOD2_GMTP-WT_GMTP
ENSMUSG00000042439.13	Zfp532	1.96568	1.00631	14.8193	2.97908862242996e-09	1.93233733814767e-07	11.7708	NOD2_GMTP-WT_GMTP
ENSMUSG00000061119.7	Prcp	0.670745	7.46939	14.8009	3.02285072625831e-09	1.95503965956526e-07	11.4963	NOD2_GMTP-WT_GMTP
ENSMUSG00000054510.5	Gm14461	1.14155	4.25872	14.7928	3.04246519151658e-09	1.96203831844825e-07	11.6203	NOD2_GMTP-WT_GMTP
ENSMUSG00000023008.18	Fmnl3	-0.775222	5.86834	-14.7732	3.09025149972207e-09	1.98711186493656e-07	11.5136	NOD2_GMTP-WT_GMTP
ENSMUSG00000050071.8	Bex1	1.98459	1.89803	14.7657	3.10885817415875e-09	1.99232702798857e-07	11.7625	NOD2_GMTP-WT_GMTP
ENSMUSG00000030159.15	Clec1b	2.30419	1.66208	14.7627	3.11621983941205e-09	1.99232702798857e-07	11.7592	NOD2_GMTP-WT_GMTP
ENSMUSG00000007659.18	Bcl2l1	-0.845767	6.53904	-14.7465	3.15694383126864e-09	2.01240137458525e-07	11.4706	NOD2_GMTP-WT_GMTP
ENSMUSG00000066861.14	Oas1g	-0.960317	5.47877	-14.743	3.1656562653136e-09	2.01240137458525e-07	11.5037	NOD2_GMTP-WT_GMTP
ENSMUSG00000024397.14	Aif1	-0.797125	7.03152	-14.7381	3.17809545791502e-09	2.01456943046755e-07	11.452	NOD2_GMTP-WT_GMTP
ENSMUSG00000020649.11	Rrm2	-1.23983	3.73127	-14.734	3.18863658568486e-09	2.01552544295712e-07	11.6176	NOD2_GMTP-WT_GMTP
ENSMUSG00000026875.14	Traf1	-1.76559	3.66306	-14.7134	3.24147369994327e-09	2.04049304104267e-07	11.607	NOD2_GMTP-WT_GMTP
ENSMUSG00000022885.16	St6gal1	1.01418	6.20227	14.7115	3.24642598292541e-09	2.04049304104267e-07	11.4508	NOD2_GMTP-WT_GMTP
ENSMUSG00000024940.11	Ltbp3	0.954093	5.9906	14.6777	3.33545166894941e-09	2.09055991823787e-07	11.4292	NOD2_GMTP-WT_GMTP
ENSMUSG00000021676.10	Iqgap2	1.05982	7.04	14.6508	3.4081524844691e-09	2.13014303602126e-07	11.3782	NOD2_GMTP-WT_GMTP
ENSMUSG00000029098.17	Acox3	0.742082	7.37045	14.6447	3.42502904134096e-09	2.13471153629723e-07	11.3665	NOD2_GMTP-WT_GMTP
ENSMUSG00000020473.13	Aebp1	-1.56073	2.34419	-14.6165	3.50343406601301e-09	2.17733455263217e-07	11.6309	NOD2_GMTP-WT_GMTP
ENSMUSG00000033105.12	Lss	-0.929578	4.59025	-14.6131	3.51293164947601e-09	2.17733455263217e-07	11.4446	NOD2_GMTP-WT_GMTP
ENSMUSG00000039747.11	Orai2	-0.791246	5.19264	-14.5802	3.60748787847572e-09	2.22974728621686e-07	11.3801	NOD2_GMTP-WT_GMTP
ENSMUSG00000022848.8	Slc49a4	0.888689	5.20716	14.5556	3.67964926170658e-09	2.26806668443257e-07	11.3586	NOD2_GMTP-WT_GMTP
ENSMUSG00000112148.1	Lilrb4a	-1.04091	6.43126	-14.5499	3.69660808558624e-09	2.27224287090044e-07	11.3076	NOD2_GMTP-WT_GMTP
ENSMUSG00000006219.12	Fblim1	0.759309	7.99122	14.5448	3.71186557187897e-09	2.27535320069603e-07	11.2719	NOD2_GMTP-WT_GMTP
ENSMUSG00000026170.6	Cyp27a1	1.27189	5.63187	14.5381	3.73214566874813e-09	2.28151688511718e-07	11.3244	NOD2_GMTP-WT_GMTP
ENSMUSG00000000693.10	Loxl3	1.02866	4.6974	14.5036	3.83783151687116e-09	2.33929459071293e-07	11.3448	NOD2_GMTP-WT_GMTP
ENSMUSG00000040710.10	St8sia4	1.35915	7.02214	14.4991	3.85168715426697e-09	2.33929459071293e-07	11.2497	NOD2_GMTP-WT_GMTP
ENSMUSG00000031996.17	Aplp2	0.714587	9.78446	14.4971	3.8581114569191e-09	2.33929459071293e-07	11.218	NOD2_GMTP-WT_GMTP
ENSMUSG00000107429.2	Gm44206	1.5293	1.4164	14.4884	3.88540415430049e-09	2.34945861503813e-07	11.5369	NOD2_GMTP-WT_GMTP
ENSMUSG00000049225.14	Pdp1	0.829177	5.77472	14.4732	3.93343299534401e-09	2.37207271419219e-07	11.2636	NOD2_GMTP-WT_GMTP
ENSMUSG00000035273.14	Hpse	0.68012	7.94676	14.4556	3.99008313631169e-09	2.39975000055317e-07	11.1963	NOD2_GMTP-WT_GMTP
ENSMUSG00000024665.8	Fads2	-1.09935	3.08795	-14.44	4.04088510816158e-09	2.42209915621712e-07	11.4331	NOD2_GMTP-WT_GMTP
ENSMUSG00000056234.15	Ncoa4	0.691589	8.70858	14.4376	4.04895345883111e-09	2.42209915621712e-07	11.1725	NOD2_GMTP-WT_GMTP
ENSMUSG00000032690.16	Oas2	-0.939586	6.17149	-14.412	4.13411655699359e-09	2.46023502239923e-07	11.1975	NOD2_GMTP-WT_GMTP
ENSMUSG00000028859.14	Csf3r	0.826918	6.93765	14.4118	4.1347561215422e-09	2.46023502239923e-07	11.1769	NOD2_GMTP-WT_GMTP
ENSMUSG00000039943.16	Plcb4	-1.72369	1.43705	-14.4085	4.14595648838638e-09	2.46033848737674e-07	11.4739	NOD2_GMTP-WT_GMTP
ENSMUSG00000027346.15	Gpcpd1	0.880907	5.70805	14.4024	4.1667772996974e-09	2.46613532859809e-07	11.2056	NOD2_GMTP-WT_GMTP
ENSMUSG00000032013.6	Trim29	2.06442	2.15489	14.3966	4.18651771455849e-09	2.47126375039533e-07	11.4593	NOD2_GMTP-WT_GMTP
ENSMUSG00000021703.9	Serinc5	0.908589	4.82906	14.3332	4.40884756845535e-09	2.59563630065816e-07	11.1907	NOD2_GMTP-WT_GMTP
ENSMUSG00000031442.21	Mcf2l	1.08295	3.67287	14.3135	4.48065581211033e-09	2.63097034567415e-07	11.2703	NOD2_GMTP-WT_GMTP
ENSMUSG00000023150.14	Ivns1abp	0.748834	6.36928	14.2997	4.53170214747968e-09	2.65395984295837e-07	11.0949	NOD2_GMTP-WT_GMTP
ENSMUSG00000074677.11	Sirpb1c	0.754679	5.58084	14.2737	4.62959358523866e-09	2.70419166668665e-07	11.1002	NOD2_GMTP-WT_GMTP
ENSMUSG00000034312.15	Iqsec1	0.813387	7.29934	14.2682	4.65053201379272e-09	2.70932952542447e-07	11.0455	NOD2_GMTP-WT_GMTP
ENSMUSG00000060586.11	H2-Eb1	1.01498	10.0097	14.2154	4.85726894455652e-09	2.82240213437213e-07	10.9746	NOD2_GMTP-WT_GMTP
ENSMUSG00000023030.16	Slc11a2	-0.713373	6.85844	-14.1961	4.93499268594447e-09	2.86011667016828e-07	10.9923	NOD2_GMTP-WT_GMTP
ENSMUSG00000036246.14	Gmip	-0.712402	7.35043	-14.1873	4.97103003157177e-09	2.87353868120365e-07	10.9742	NOD2_GMTP-WT_GMTP
ENSMUSG00000025225.15	Nfkb2	-0.97739	6.28371	-14.1656	5.0610649030882e-09	2.918024319964e-07	10.9811	NOD2_GMTP-WT_GMTP
ENSMUSG00000032232.14	Cgnl1	1.35148	3.42598	14.1574	5.095694920934e-09	2.93041857656702e-07	11.1615	NOD2_GMTP-WT_GMTP
ENSMUSG00000041992.9	Rapgef5	-1.30689	5.00093	-14.1277	5.22251580834114e-09	2.99562969746827e-07	11.0025	NOD2_GMTP-WT_GMTP
ENSMUSG00000049985.15	Ankrd55	1.3208	1.79851	14.1227	5.24407151310857e-09	3.00028122235876e-07	11.2431	NOD2_GMTP-WT_GMTP
ENSMUSG00000015961.8	Adss	0.62008	6.58225	14.0994	5.34651662339175e-09	3.05106970377852e-07	10.9148	NOD2_GMTP-WT_GMTP
ENSMUSG00000026271.15	Gpr35	1.76319	1.51118	14.0694	5.48174792801402e-09	3.12026126320859e-07	11.2002	NOD2_GMTP-WT_GMTP
ENSMUSG00000006517.5	Mvd	-1.33431	4.52675	-14.0475	5.58267366578967e-09	3.16962334617723e-07	10.9648	NOD2_GMTP-WT_GMTP
ENSMUSG00000073555.1	Gm4951	-1.18882	3.57672	-14.0444	5.59701792448325e-09	3.16970205454301e-07	11.0491	NOD2_GMTP-WT_GMTP
ENSMUSG00000017715.11	Pgs1	-1.01312	5.17666	-14.0339	5.64604270349932e-09	3.18937090742228e-07	10.9108	NOD2_GMTP-WT_GMTP
ENSMUSG00000002885.14	Adgre5	0.77394	6.57552	14.0197	5.71336284654365e-09	3.21924912108405e-07	10.8451	NOD2_GMTP-WT_GMTP
ENSMUSG00000033538.13	Casp4	-1.01662	5.30045	-14.0162	5.73035443084359e-09	3.22069013640839e-07	10.8889	NOD2_GMTP-WT_GMTP
ENSMUSG00000030107.10	Usp18	-1.04829	5.62035	-13.9924	5.84539749156884e-09	3.27709432737124e-07	10.8532	NOD2_GMTP-WT_GMTP
ENSMUSG00000073739.3	Gm16287	1.93714	0.980742	13.9892	5.86108000564314e-09	3.27765108185251e-07	11.1173	NOD2_GMTP-WT_GMTP
ENSMUSG00000038886.10	Man2a2	1.05444	7.2045	13.9802	5.90559003604682e-09	3.29428576185781e-07	10.7954	NOD2_GMTP-WT_GMTP
ENSMUSG00000029605.16	Oas1b	-1.30956	2.86877	-13.9468	6.07279517316016e-09	3.372192606337e-07	11.0344	NOD2_GMTP-WT_GMTP
ENSMUSG00000043004.13	Gng2	0.712164	7.13646	13.9435	6.08983653260282e-09	3.372192606337e-07	10.7644	NOD2_GMTP-WT_GMTP
ENSMUSG00000026358.13	Rgs1	-0.897377	6.04631	-13.9434	6.09059122643217e-09	3.372192606337e-07	10.7938	NOD2_GMTP-WT_GMTP
ENSMUSG00000024165.9	Jpt2	-0.759048	5.5443	-13.9396	6.1098003320964e-09	3.37445482203136e-07	10.8101	NOD2_GMTP-WT_GMTP
ENSMUSG00000032766.9	Gng11	1.28716	3.85088	13.9325	6.14644654441657e-09	3.38534861157202e-07	10.9243	NOD2_GMTP-WT_GMTP
ENSMUSG00000028327.14	Stra6l	0.911374	5.66403	13.9284	6.16754447790543e-09	3.38534861157202e-07	10.7949	NOD2_GMTP-WT_GMTP
ENSMUSG00000079020.9	Slc45a4	0.843069	6.48427	13.9269	6.17504093985485e-09	3.38534861157202e-07	10.7657	NOD2_GMTP-WT_GMTP
ENSMUSG00000032661.9	Oas3	-0.947784	8.99753	-13.9236	6.19247241418216e-09	3.3865842396482e-07	10.7219	NOD2_GMTP-WT_GMTP
ENSMUSG00000022408.7	Fam83f	0.937595	5.0365	13.9166	6.22897571020176e-09	3.39821846018904e-07	10.8155	NOD2_GMTP-WT_GMTP
ENSMUSG00000003382.18	Etv3	-0.697799	7.64081	-13.911	6.25836461883593e-09	3.4059241400021e-07	10.7261	NOD2_GMTP-WT_GMTP
ENSMUSG00000031129.9	Slc9a9	1.07909	5.46898	13.9039	6.29595076710213e-09	3.41804256609123e-07	10.7818	NOD2_GMTP-WT_GMTP
ENSMUSG00000050271.12	Prag1	-1.96853	2.53659	-13.8856	6.3937979168356e-09	3.46273817762992e-07	11.0091	NOD2_GMTP-WT_GMTP
ENSMUSG00000048965.9	Mrgpre	0.826725	4.61968	13.8438	6.62317565076997e-09	3.57827889335667e-07	10.7787	NOD2_GMTP-WT_GMTP
ENSMUSG00000093930.2	Hmgcs1	-0.885	5.8314	-13.838	6.65528272221369e-09	3.58694017827908e-07	10.7082	NOD2_GMTP-WT_GMTP
ENSMUSG00000059108.4	Ifitm6	1.80641	2.82373	13.7922	6.91813509478161e-09	3.71962285228583e-07	10.9047	NOD2_GMTP-WT_GMTP
ENSMUSG00000036098.15	Myrf	1.50172	2.90426	13.7796	6.99287350105093e-09	3.74484308226358e-07	10.8864	NOD2_GMTP-WT_GMTP
ENSMUSG00000002105.15	Slc39a13	-0.926234	4.01298	-13.7786	6.99860872721692e-09	3.74484308226358e-07	10.7731	NOD2_GMTP-WT_GMTP
ENSMUSG00000048078.16	Tenm4	1.7528	1.44208	13.7486	7.17936620282597e-09	3.83113024099594e-07	10.9333	NOD2_GMTP-WT_GMTP
ENSMUSG00000035891.16	Cerk	0.613425	8.69158	13.7461	7.19420773081745e-09	3.83113024099594e-07	10.5658	NOD2_GMTP-WT_GMTP
ENSMUSG00000032508.8	Myd88	-0.709211	6.41393	-13.7382	7.24257207363663e-09	3.84770263521558e-07	10.5996	NOD2_GMTP-WT_GMTP
ENSMUSG00000032561.15	Acpp	1.33785	3.73669	13.7006	7.47853142448506e-09	3.96362165497708e-07	10.7314	NOD2_GMTP-WT_GMTP
ENSMUSG00000035547.14	Capn5	0.653765	5.59008	13.6962	7.50643955000398e-09	3.96898544263599e-07	10.5914	NOD2_GMTP-WT_GMTP
ENSMUSG00000017652.16	Cd40	-1.9985	3.60714	-13.6539	7.78232377613275e-09	4.10512979708866e-07	10.7036	NOD2_GMTP-WT_GMTP
ENSMUSG00000021482.10	Prxl2c	0.756411	5.09653	13.6399	7.87654203626056e-09	4.14503024658212e-07	10.5656	NOD2_GMTP-WT_GMTP
ENSMUSG00000008734.9	Gprc5b	0.975462	4.92275	13.6294	7.94766891369367e-09	4.1726196816764e-07	10.5666	NOD2_GMTP-WT_GMTP
ENSMUSG00000079419.4	Ms4a6c	-0.701673	7.5752	-13.5995	8.15383276301388e-09	4.2597427055896e-07	10.4479	NOD2_GMTP-WT_GMTP
ENSMUSG00000054203.7	Ifi205	-2.11373	3.50152	-13.5976	8.16673208698306e-09	4.2597427055896e-07	10.6644	NOD2_GMTP-WT_GMTP
ENSMUSG00000025574.13	Tk1	-1.21909	2.82554	-13.597	8.17088638010285e-09	4.2597427055896e-07	10.7337	NOD2_GMTP-WT_GMTP
ENSMUSG00000054027.8	Nt5dc3	0.691115	4.88308	13.5813	8.28186299797147e-09	4.30753401104283e-07	10.5259	NOD2_GMTP-WT_GMTP
ENSMUSG00000034247.9	Plekhm1	0.647643	7.99439	13.5597	8.4373328158346e-09	4.37819086324924e-07	10.4053	NOD2_GMTP-WT_GMTP
ENSMUSG00000017390.15	Aldoc	-0.923344	4.00493	-13.5567	8.45861040172269e-09	4.37904811818187e-07	10.576	NOD2_GMTP-WT_GMTP
ENSMUSG00000020101.14	Vsir	0.679292	9.5309	13.5456	8.54036433903473e-09	4.41113771983523e-07	10.3795	NOD2_GMTP-WT_GMTP
ENSMUSG00000039908.14	Slc26a11	0.942145	5.69696	13.5399	8.58181743836088e-09	4.4223116051304e-07	10.4458	NOD2_GMTP-WT_GMTP
ENSMUSG00000024732.7	Ccdc86	-0.960323	5.18885	-13.5359	8.61204243400524e-09	4.42766135552901e-07	10.4664	NOD2_GMTP-WT_GMTP
ENSMUSG00000027078.14	Ube2l6	-0.936039	6.90939	-13.5264	8.682263644795e-09	4.45350226911059e-07	10.3953	NOD2_GMTP-WT_GMTP
ENSMUSG00000003882.5	Il7r	0.800839	8.97201	13.4978	8.89927136726945e-09	4.55434500041017e-07	10.3389	NOD2_GMTP-WT_GMTP
ENSMUSG00000031431.13	Tsc22d3	0.733621	6.7728	13.4558	9.22828428827175e-09	4.70406278158459e-07	10.3343	NOD2_GMTP-WT_GMTP
ENSMUSG00000046080.17	Clec9a	3.05058	0.447335	13.4551	9.23398690599225e-09	4.70406278158459e-07	10.6385	NOD2_GMTP-WT_GMTP
ENSMUSG00000029217.16	Tec	0.566478	6.46328	13.4431	9.33034962953994e-09	4.73415879228133e-07	10.3311	NOD2_GMTP-WT_GMTP
ENSMUSG00000021892.14	Sh3bp5	-0.730336	6.14586	-13.4405	9.3520552717827e-09	4.73415879228133e-07	10.3385	NOD2_GMTP-WT_GMTP
ENSMUSG00000039982.8	Dtx4	0.670905	6.49306	13.4371	9.37975243526822e-09	4.73415879228133e-07	10.3246	NOD2_GMTP-WT_GMTP
ENSMUSG00000037868.15	Egr2	0.838555	5.48356	13.4367	9.38275162211629e-09	4.73415879228133e-07	10.3613	NOD2_GMTP-WT_GMTP
ENSMUSG00000047712.8	Ust	-1.49035	3.14206	-13.4332	9.41087163758141e-09	4.73415879228133e-07	10.5563	NOD2_GMTP-WT_GMTP
ENSMUSG00000020654.15	Adcy3	1.20282	4.56036	13.4321	9.42036706750732e-09	4.73415879228133e-07	10.4137	NOD2_GMTP-WT_GMTP
ENSMUSG00000025473.16	Adam8	-0.599821	9.2342	-13.425	9.4783129921835e-09	4.74905058545836e-07	10.2707	NOD2_GMTP-WT_GMTP
ENSMUSG00000036086.16	Zranb3	-1.00308	4.7728	-13.4215	9.50704241666114e-09	4.74905058545836e-07	10.3882	NOD2_GMTP-WT_GMTP
ENSMUSG00000003617.16	Cp	-1.07525	3.53847	-13.4207	9.51385117061751e-09	4.74905058545836e-07	10.5019	NOD2_GMTP-WT_GMTP
ENSMUSG00000021701.8	Plk2	0.666372	8.03117	13.4029	9.66156933634554e-09	4.81202224557763e-07	10.2616	NOD2_GMTP-WT_GMTP
ENSMUSG00000026536.9	Ifi211	-0.984288	7.22937	-13.3938	9.73880945286497e-09	4.83968942810192e-07	10.267	NOD2_GMTP-WT_GMTP
ENSMUSG00000022235.15	Cmbl	1.36071	2.61099	13.3871	9.79552847193147e-09	4.8570583732046e-07	10.5671	NOD2_GMTP-WT_GMTP
ENSMUSG00000055612.15	Cdca7	-1.52677	1.79	-13.369	9.95091557337886e-09	4.92316583567189e-07	10.6028	NOD2_GMTP-WT_GMTP
ENSMUSG00000040829.14	Zmynd15	-1.05349	3.81121	-13.3657	9.97956862413286e-09	4.92641846704152e-07	10.4231	NOD2_GMTP-WT_GMTP
ENSMUSG00000029417.9	Cxcl9	-1.51291	1.9845	-13.3609	1.00218097627279e-08	4.93634969615339e-07	10.5875	NOD2_GMTP-WT_GMTP
ENSMUSG00000039013.16	Siglecf	1.02544	3.18733	13.3537	1.00843078225508e-08	4.95075747574756e-07	10.48	NOD2_GMTP-WT_GMTP
ENSMUSG00000082292.3	Gm12250	-1.01827	5.34492	-13.3479	1.0135879756495e-08	4.95075747574756e-07	10.2868	NOD2_GMTP-WT_GMTP
ENSMUSG00000050390.12	C77080	0.743763	7.54612	13.3415	1.01929307683597e-08	4.95075747574756e-07	10.2127	NOD2_GMTP-WT_GMTP
ENSMUSG00000055723.6	Rras2	1.23893	2.24949	13.3413	1.01943388579363e-08	4.95075747574756e-07	10.5547	NOD2_GMTP-WT_GMTP
ENSMUSG00000027805.16	Pfn2	1.96121	1.7674	13.3412	1.01951050528962e-08	4.95075747574756e-07	10.5792	NOD2_GMTP-WT_GMTP
ENSMUSG00000048924.14	Ccdc125	0.90493	4.01677	13.3405	1.02012435965619e-08	4.95075747574756e-07	10.3791	NOD2_GMTP-WT_GMTP
ENSMUSG00000021838.17	Samd4	2.51133	1.36101	13.3399	1.02063749331953e-08	4.95075747574756e-07	10.5851	NOD2_GMTP-WT_GMTP
ENSMUSG00000027514.14	Zbp1	-1.30084	6.49587	-13.3318	1.02789741847306e-08	4.97515728815387e-07	10.228	NOD2_GMTP-WT_GMTP
ENSMUSG00000028136.15	Snx27	0.784998	7.62732	13.3287	1.03069454896146e-08	4.9778977209907e-07	10.1995	NOD2_GMTP-WT_GMTP
ENSMUSG00000017009.3	Sdc4	-0.801354	6.54912	-13.3205	1.03814367146498e-08	5.00304530051796e-07	10.216	NOD2_GMTP-WT_GMTP
ENSMUSG00000029561.17	Oasl2	-0.878794	8.548	-13.316	1.04216005078907e-08	5.01157698561564e-07	10.1755	NOD2_GMTP-WT_GMTP
ENSMUSG00000003283.15	Hck	-0.80496	7.47138	-13.2981	1.05862265863812e-08	5.07979513595535e-07	10.1741	NOD2_GMTP-WT_GMTP
ENSMUSG00000022346.16	Myc	-1.35448	2.0241	-13.2932	1.06319733060344e-08	5.088576776871e-07	10.5258	NOD2_GMTP-WT_GMTP
ENSMUSG00000023988.8	Bysl	-0.910523	3.65144	-13.2912	1.06501382817136e-08	5.088576776871e-07	10.3723	NOD2_GMTP-WT_GMTP
ENSMUSG00000036067.12	Slc2a6	-1.26413	6.20799	-13.2847	1.07113390670134e-08	5.10688266244167e-07	10.1934	NOD2_GMTP-WT_GMTP
ENSMUSG00000029177.9	Cenpa	1.33527	4.31777	13.279	1.07646807673964e-08	5.10972939887808e-07	10.2943	NOD2_GMTP-WT_GMTP
ENSMUSG00000079547.4	H2-DMb1	0.914016	7.31609	13.2774	1.07804232816011e-08	5.10972939887808e-07	10.1579	NOD2_GMTP-WT_GMTP
ENSMUSG00000022661.14	Cd200	1.0545	4.53041	13.2768	1.07860106075901e-08	5.10972939887808e-07	10.2742	NOD2_GMTP-WT_GMTP
ENSMUSG00000024097.11	Srsf7	-0.847807	5.1076	-13.274	1.08126059543121e-08	5.11147620039335e-07	10.2318	NOD2_GMTP-WT_GMTP
ENSMUSG00000000440.12	Pparg	0.606578	6.40273	13.269	1.08595168008432e-08	5.12279912002567e-07	10.1727	NOD2_GMTP-WT_GMTP
ENSMUSG00000029009.17	Mthfr	-0.796231	6.80048	-13.2627	1.09201518186097e-08	5.14053475798815e-07	10.1559	NOD2_GMTP-WT_GMTP
ENSMUSG00000028793.15	Rnf19b	-0.849998	7.22416	-13.2587	1.09579500404116e-08	5.14746819477272e-07	10.1425	NOD2_GMTP-WT_GMTP
ENSMUSG00000049744.15	Arhgap15	0.729228	5.05338	13.2458	1.1083041682237e-08	5.19525155351362e-07	10.2089	NOD2_GMTP-WT_GMTP
ENSMUSG00000035863.14	Palm	1.45094	2.56363	13.2434	1.11062384754448e-08	5.19525155351362e-07	10.4428	NOD2_GMTP-WT_GMTP
ENSMUSG00000027864.9	Ptgfrn	1.15223	4.25116	13.2268	1.1269884946868e-08	5.26077286233194e-07	10.2524	NOD2_GMTP-WT_GMTP
ENSMUSG00000046718.8	Bst2	-1.02136	8.55616	-13.2213	1.13243471275458e-08	5.26641217813669e-07	10.0876	NOD2_GMTP-WT_GMTP
ENSMUSG00000060675.13	Plaat3	-1.30821	4.01705	-13.2208	1.13291706426998e-08	5.26641217813669e-07	10.2695	NOD2_GMTP-WT_GMTP
ENSMUSG00000023832.14	Acat2	-1.54797	3.04067	-13.2156	1.13811169645209e-08	5.27956055778286e-07	10.3706	NOD2_GMTP-WT_GMTP
ENSMUSG00000020592.14	Sdc1	1.0334	7.31824	13.1944	1.15955037639404e-08	5.36785218848137e-07	10.0809	NOD2_GMTP-WT_GMTP
ENSMUSG00000021822.3	Plau	-1.08805	6.60252	-13.1878	1.16634003449245e-08	5.38810459412632e-07	10.0916	NOD2_GMTP-WT_GMTP
ENSMUSG00000017754.13	Pltp	0.947549	9.74342	13.1779	1.17649731384068e-08	5.4079907591942e-07	10.0402	NOD2_GMTP-WT_GMTP
ENSMUSG00000048756.11	Foxo3	0.892053	7.31377	13.1756	1.17890214353563e-08	5.4079907591942e-07	10.0635	NOD2_GMTP-WT_GMTP
ENSMUSG00000055148.7	Klf2	1.23386	3.96254	13.1743	1.1802854598606e-08	5.4079907591942e-07	10.232	NOD2_GMTP-WT_GMTP
ENSMUSG00000013089.15	Etv5	-1.46404	4.25651	-13.1742	1.18033948806865e-08	5.4079907591942e-07	10.2035	NOD2_GMTP-WT_GMTP
ENSMUSG00000008398.16	Elk3	-0.733866	5.28865	-13.1107	1.24850683656457e-08	5.70859283693958e-07	10.0702	NOD2_GMTP-WT_GMTP
ENSMUSG00000031257.14	Nox1	-2.85288	-0.617037	-13.0485	1.31936872170497e-08	6.01127548336881e-07	10.1249	NOD2_GMTP-WT_GMTP
ENSMUSG00000078853.8	Igtp	-1.02843	5.59408	-13.0479	1.32009366147569e-08	6.01127548336881e-07	9.99661	NOD2_GMTP-WT_GMTP
ENSMUSG00000005615.15	Pcyt1a	0.749201	8.13989	13.0431	1.32582672614502e-08	6.02508589419021e-07	9.92568	NOD2_GMTP-WT_GMTP
ENSMUSG00000050022.16	Amz1	0.756212	6.28077	13.0375	1.33243306818486e-08	6.04280062000177e-07	9.96064	NOD2_GMTP-WT_GMTP
ENSMUSG00000025153.9	Fasn	-1.11361	6.05588	-13.0191	1.35447025665965e-08	6.13028292836649e-07	9.95095	NOD2_GMTP-WT_GMTP
ENSMUSG00000010406.12	Mrpl52	-1.124	4.06815	-13.0053	1.3711954969907e-08	6.19341804136711e-07	10.0646	NOD2_GMTP-WT_GMTP
ENSMUSG00000001700.10	Gramd3	1.00566	4.38787	12.9804	1.40195672685548e-08	6.3195677669346e-07	10.011	NOD2_GMTP-WT_GMTP
ENSMUSG00000053175.17	Bcl3	-1.38767	4.49983	-12.9692	1.41617110616194e-08	6.37077134915147e-07	9.99093	NOD2_GMTP-WT_GMTP
ENSMUSG00000042190.12	Cmklr1	1.12467	5.4283	12.9549	1.43441313471903e-08	6.43985116196895e-07	9.91683	NOD2_GMTP-WT_GMTP
ENSMUSG00000078920.3	Ifi47	-1.0589	6.43011	-12.951	1.43938698906039e-08	6.4492051981736e-07	9.87453	NOD2_GMTP-WT_GMTP
ENSMUSG00000032643.12	Fhl3	-0.685416	6.10347	-12.9419	1.45112366322232e-08	6.48876198346284e-07	9.87647	NOD2_GMTP-WT_GMTP
ENSMUSG00000028364.15	Tnc	-2.29598	1.61604	-12.9334	1.46220810987535e-08	6.52524991112975e-07	10.2228	NOD2_GMTP-WT_GMTP
ENSMUSG00000044708.5	Kcnj10	1.45251	4.15399	12.9263	1.47155831441943e-08	6.55180351842851e-07	9.98187	NOD2_GMTP-WT_GMTP
ENSMUSG00000058446.14	Znrf2	0.68336	7.62335	12.9245	1.47403099818541e-08	6.55180351842851e-07	9.82147	NOD2_GMTP-WT_GMTP
ENSMUSG00000090137.8	Uba52	-1.54142	3.47237	-12.9214	1.47810955655545e-08	6.55687048417926e-07	10.0508	NOD2_GMTP-WT_GMTP
ENSMUSG00000044827.10	Tlr1	-0.731013	7.07632	-12.9129	1.48942164373981e-08	6.59394149539016e-07	9.82151	NOD2_GMTP-WT_GMTP
ENSMUSG00000085448.1	Gm13963	1.92335	0.785394	12.9012	1.50508833337061e-08	6.65010613514822e-07	10.1925	NOD2_GMTP-WT_GMTP
ENSMUSG00000040451.18	Sgms1	0.65391	5.81934	12.8771	1.53809609395273e-08	6.78251741983543e-07	9.82582	NOD2_GMTP-WT_GMTP
ENSMUSG00000031880.7	Rrad	-1.67558	2.67733	-12.8734	1.54325198916535e-08	6.78256115066362e-07	10.0944	NOD2_GMTP-WT_GMTP
ENSMUSG00000028756.12	Pink1	0.839968	6.52574	12.8727	1.54418548135039e-08	6.78256115066362e-07	9.79744	NOD2_GMTP-WT_GMTP
ENSMUSG00000054008.9	Ndst1	0.96485	7.40574	12.8614	1.56003720650407e-08	6.83872498796173e-07	9.76554	NOD2_GMTP-WT_GMTP
ENSMUSG00000032228.16	Tcf12	0.735369	6.04511	12.8586	1.56390063267817e-08	6.84221859155845e-07	9.79963	NOD2_GMTP-WT_GMTP
ENSMUSG00000025509.15	Pnpla2	0.816786	7.07873	12.8435	1.58541382089298e-08	6.92276684649416e-07	9.75545	NOD2_GMTP-WT_GMTP
ENSMUSG00000026220.6	Slc16a14	3.13189	-0.201115	12.83	1.60478735835304e-08	6.99367584510379e-07	10.0329	NOD2_GMTP-WT_GMTP
ENSMUSG00000042712.10	Tceal9	0.782576	5.65474	12.8137	1.62856417402023e-08	7.08346050972972e-07	9.77239	NOD2_GMTP-WT_GMTP
ENSMUSG00000004933.17	Matk	1.13658	5.56186	12.8002	1.64858636676259e-08	7.15659680964469e-07	9.76383	NOD2_GMTP-WT_GMTP
ENSMUSG00000058135.12	Gstm1	0.911266	6.88426	12.7975	1.65269657739828e-08	7.16050849155104e-07	9.71613	NOD2_GMTP-WT_GMTP
ENSMUSG00000062515.3	Fabp4	0.998362	7.44012	12.7893	1.66499863518227e-08	7.19801787473295e-07	9.69605	NOD2_GMTP-WT_GMTP
ENSMUSG00000022098.10	Bmp1	-1.89092	1.12681	-12.7874	1.66780587157125e-08	7.19801787473295e-07	10.0993	NOD2_GMTP-WT_GMTP
ENSMUSG00000036833.16	Pnpla7	0.6325	7.90349	12.7494	1.72620575436064e-08	7.42440593203357e-07	9.64993	NOD2_GMTP-WT_GMTP
ENSMUSG00000030156.5	Cd69	-2.37729	1.63276	-12.749	1.7269155553827e-08	7.42440593203357e-07	10.0553	NOD2_GMTP-WT_GMTP
ENSMUSG00000023885.9	Thbs2	-2.58301	1.21309	-12.7246	1.76555134864252e-08	7.57591293120396e-07	10.0428	NOD2_GMTP-WT_GMTP
ENSMUSG00000037997.12	Parp11	-0.654411	5.26051	-12.7153	1.78059089505081e-08	7.62578208085774e-07	9.69768	NOD2_GMTP-WT_GMTP
ENSMUSG00000021037.7	Ahsa1	-0.649945	7.22252	-12.7079	1.79260316748194e-08	7.6625200145641e-07	9.62242	NOD2_GMTP-WT_GMTP
ENSMUSG00000039236.18	Isg20	-1.47663	4.08004	-12.6993	1.80672835351485e-08	7.70813188374319e-07	9.77445	NOD2_GMTP-WT_GMTP
ENSMUSG00000014496.8	Ankrd28	-1.15847	5.24856	-12.6727	1.85104328829406e-08	7.88212383429491e-07	9.6574	NOD2_GMTP-WT_GMTP
ENSMUSG00000026837.16	Col5a1	-1.61175	1.73373	-12.647	1.89508191735443e-08	8.05427863274844e-07	9.95738	NOD2_GMTP-WT_GMTP
ENSMUSG00000056758.14	Hmga2	0.873427	4.07198	12.6384	1.91002833625538e-08	8.09135680362861e-07	9.71702	NOD2_GMTP-WT_GMTP
ENSMUSG00000026390.7	Marco	-2.14676	1.84947	-12.6378	1.9110585916337e-08	8.09135680362861e-07	9.94279	NOD2_GMTP-WT_GMTP
ENSMUSG00000026656.15	Fcgr2b	0.617767	7.34384	12.6158	1.94986106606932e-08	8.24000946348575e-07	9.53098	NOD2_GMTP-WT_GMTP
ENSMUSG00000032377.8	Plscr4	1.10368	4.19772	12.6074	1.96495715255789e-08	8.28810755104428e-07	9.67461	NOD2_GMTP-WT_GMTP
ENSMUSG00000027765.6	P2ry1	1.03493	3.34511	12.6022	1.97430952494093e-08	8.30386591060603e-07	9.76464	NOD2_GMTP-WT_GMTP
ENSMUSG00000062373.8	Tmem65	0.641292	7.11009	12.5998	1.97868418372477e-08	8.30386591060603e-07	9.5205	NOD2_GMTP-WT_GMTP
ENSMUSG00000001435.15	Col18a1	-0.798204	5.46142	-12.5992	1.97985777996791e-08	8.30386591060603e-07	9.57542	NOD2_GMTP-WT_GMTP
ENSMUSG00000078921.3	Tgtp2	-1.35578	4.65966	-12.5896	1.99731531072292e-08	8.36136895462675e-07	9.61657	NOD2_GMTP-WT_GMTP
ENSMUSG00000046223.10	Plaur	1.08727	5.32243	12.5865	2.00308133903972e-08	8.36980410449312e-07	9.57035	NOD2_GMTP-WT_GMTP
ENSMUSG00000036552.19	Ermard	1.09676	3.98727	12.5621	2.04840265050775e-08	8.54317912911765e-07	9.65259	NOD2_GMTP-WT_GMTP
ENSMUSG00000021775.11	Nr1d2	0.869618	5.93309	12.5401	2.09028939362366e-08	8.70160955968746e-07	9.49755	NOD2_GMTP-WT_GMTP
ENSMUSG00000029752.12	Asns	-1.2932	2.63124	-12.5381	2.09422087526867e-08	8.70174122716382e-07	9.78495	NOD2_GMTP-WT_GMTP
ENSMUSG00000041773.8	Enc1	1.00367	5.69147	12.5189	2.13162621546807e-08	8.84070181147564e-07	9.48678	NOD2_GMTP-WT_GMTP
ENSMUSG00000019960.8	Dusp6	-1.23611	3.67404	-12.5081	2.15286204330333e-08	8.9122097907657e-07	9.63538	NOD2_GMTP-WT_GMTP
ENSMUSG00000040033.16	Stat2	-0.896699	8.09386	-12.4973	2.17458680730624e-08	8.98547322804151e-07	9.40287	NOD2_GMTP-WT_GMTP
ENSMUSG00000036641.9	Ccdc148	2.03166	2.10657	12.486	2.19725599270152e-08	9.06236099170961e-07	9.78385	NOD2_GMTP-WT_GMTP
ENSMUSG00000058056.16	Palld	1.12807	3.48053	12.4753	2.21916501887532e-08	9.13583562106366e-07	9.62639	NOD2_GMTP-WT_GMTP
ENSMUSG00000021322.8	Aoah	-0.652704	6.74166	-12.4443	2.28374441828076e-08	9.38438106907892e-07	9.37792	NOD2_GMTP-WT_GMTP
ENSMUSG00000026473.16	Glul	0.621302	8.34219	12.423	2.3294401754369e-08	9.55455857252269e-07	9.32694	NOD2_GMTP-WT_GMTP
ENSMUSG00000031904.5	Slc7a6	-0.870444	3.68179	-12.4176	2.34104506816756e-08	9.5832142737272e-07	9.54688	NOD2_GMTP-WT_GMTP
ENSMUSG00000037235.13	Mxd4	0.753401	6.98797	12.4158	2.3450163552436e-08	9.5832142737272e-07	9.34368	NOD2_GMTP-WT_GMTP
ENSMUSG00000034855.13	Cxcl10	-2.01201	4.23506	-12.379	2.42655787141473e-08	9.89831549997748e-07	9.44957	NOD2_GMTP-WT_GMTP
ENSMUSG00000054072.12	Iigp1	-1.24662	4.02402	-12.3655	2.45731108979087e-08	1.00054712311138e-06	9.45798	NOD2_GMTP-WT_GMTP
ENSMUSG00000021003.10	Galc	0.534392	7.86274	12.3447	2.50552661594935e-08	1.01665365808357e-06	9.25634	NOD2_GMTP-WT_GMTP
ENSMUSG00000028497.12	Hacd4	0.819172	7.87537	12.3445	2.50598087189515e-08	1.01665365808357e-06	9.25596	NOD2_GMTP-WT_GMTP
ENSMUSG00000015846.15	Rxra	0.639267	6.77263	12.3399	2.51671319557013e-08	1.0191546557669e-06	9.27439	NOD2_GMTP-WT_GMTP
ENSMUSG00000017830.15	Dhx58	-0.751016	6.79796	-12.3016	2.60846630859938e-08	1.05439689753221e-06	9.23588	NOD2_GMTP-WT_GMTP
ENSMUSG00000015202.13	Cnksr3	0.951599	3.89027	12.2935	2.62836868245338e-08	1.05865415143632e-06	9.40191	NOD2_GMTP-WT_GMTP
ENSMUSG00000017607.9	Tns4	1.98722	1.58848	12.2934	2.62848742838579e-08	1.05865415143632e-06	9.63488	NOD2_GMTP-WT_GMTP
ENSMUSG00000021895.10	Arhgef3	0.762249	5.12072	12.2873	2.64362696395161e-08	1.06172345171573e-06	9.28935	NOD2_GMTP-WT_GMTP
ENSMUSG00000037406.7	Htra4	1.94579	0.394747	12.2865	2.64562469929613e-08	1.06172345171573e-06	9.62642	NOD2_GMTP-WT_GMTP
ENSMUSG00000037370.13	Enpp1	0.725515	4.61824	12.2769	2.66967252610587e-08	1.06942254365692e-06	9.31452	NOD2_GMTP-WT_GMTP
ENSMUSG00000002871.14	Tpra1	0.778436	6.44997	12.275	2.67439510312626e-08	1.06942254365692e-06	9.21942	NOD2_GMTP-WT_GMTP
ENSMUSG00000030402.5	Ppm1n	-4.28812	-1.41895	-12.2708	2.68493296480496e-08	1.0717157288675e-06	9.26736	NOD2_GMTP-WT_GMTP
ENSMUSG00000064225.6	Paqr9	1.62284	0.85497	12.2605	2.71109252345796e-08	1.08022513349853e-06	9.61859	NOD2_GMTP-WT_GMTP
ENSMUSG00000009621.18	Vav2	0.701829	5.96592	12.244	2.75320336798869e-08	1.09504860516812e-06	9.2054	NOD2_GMTP-WT_GMTP
ENSMUSG00000041515.10	Irf8	0.615037	8.58034	12.2333	2.78118854342569e-08	1.10421103148501e-06	9.13671	NOD2_GMTP-WT_GMTP
ENSMUSG00000000326.13	Comt	0.677625	6.51819	12.2224	2.80994353163797e-08	1.11364600393318e-06	9.16504	NOD2_GMTP-WT_GMTP
ENSMUSG00000090958.2	Lrrc32	2.03179	1.82454	12.1585	2.98460756217612e-08	1.18077213714248e-06	9.49292	NOD2_GMTP-WT_GMTP
ENSMUSG00000038393.14	Txnip	0.602745	8.5815	12.1515	3.00433412969038e-08	1.18647269797843e-06	9.05498	NOD2_GMTP-WT_GMTP
ENSMUSG00000051343.11	Rab11fip5	0.638331	8.00822	12.1464	3.0189094968655e-08	1.18838404465373e-06	9.05686	NOD2_GMTP-WT_GMTP
ENSMUSG00000025007.13	Aldh18a1	-0.872889	2.97019	-12.1461	3.01982590112789e-08	1.18838404465373e-06	9.36844	NOD2_GMTP-WT_GMTP
ENSMUSG00000023959.10	Clic5	-2.23094	2.43685	-12.1328	3.05791505336101e-08	1.20125455256416e-06	9.41575	NOD2_GMTP-WT_GMTP
ENSMUSG00000029319.8	Coq2	-0.709626	4.32968	-12.1254	3.07959122266262e-08	1.20764356680617e-06	9.18986	NOD2_GMTP-WT_GMTP
ENSMUSG00000050106.17	Tmc8	1.55011	1.72952	12.1234	3.08544280682588e-08	1.20778116925588e-06	9.46536	NOD2_GMTP-WT_GMTP
ENSMUSG00000032515.8	Csrnp1	-1.03405	3.01802	-12.1215	3.09076792741949e-08	1.20778116925588e-06	9.33845	NOD2_GMTP-WT_GMTP
ENSMUSG00000052776.10	Oas1a	-0.634227	7.26343	-12.1099	3.12502833577799e-08	1.21903421776599e-06	9.0337	NOD2_GMTP-WT_GMTP
ENSMUSG00000034255.17	Arhgap27	-0.763629	5.19049	-12.1062	3.13622578052187e-08	1.22126711764022e-06	9.10485	NOD2_GMTP-WT_GMTP
ENSMUSG00000019082.18	Slc25a22	-0.853424	5.05404	-12.1024	3.1474446379338e-08	1.22350056108392e-06	9.10951	NOD2_GMTP-WT_GMTP
ENSMUSG00000035448.9	Ccr3	-1.05013	3.46212	-12.0915	3.18003969473254e-08	1.23402131667073e-06	9.25331	NOD2_GMTP-WT_GMTP
ENSMUSG00000074063.10	Osgin1	0.982521	3.85469	12.0868	3.19426992999291e-08	1.23739140534604e-06	9.20177	NOD2_GMTP-WT_GMTP
ENSMUSG00000061132.13	Blnk	0.640916	7.45049	12.0763	3.22633884856601e-08	1.2476481581985e-06	8.99605	NOD2_GMTP-WT_GMTP
ENSMUSG00000028088.14	Fmo5	1.07151	4.0671	12.0657	3.2591161215071e-08	1.25814287230429e-06	9.15711	NOD2_GMTP-WT_GMTP
ENSMUSG00000038417.4	Fig4	0.566885	5.67266	12.0534	3.29764545431932e-08	1.26864329375506e-06	9.02692	NOD2_GMTP-WT_GMTP
ENSMUSG00000038014.7	Fam120a	0.535751	8.42121	12.0534	3.29768794145984e-08	1.26864329375506e-06	8.95802	NOD2_GMTP-WT_GMTP
ENSMUSG00000035385.5	Ccl2	-2.24049	1.34547	-12.0451	3.3238003864159e-08	1.2764880898812e-06	9.40944	NOD2_GMTP-WT_GMTP
ENSMUSG00000074634.12	Tmem267	2.02123	1.45944	12.0174	3.41292434606309e-08	1.30846358992622e-06	9.37817	NOD2_GMTP-WT_GMTP
ENSMUSG00000037706.17	Cd81	-1.15425	4.34649	-12.0058	3.45087312181039e-08	1.32074325843834e-06	9.06851	NOD2_GMTP-WT_GMTP
ENSMUSG00000034858.16	Fam214a	1.17132	5.12829	11.9683	3.57706897171381e-08	1.36669760215497e-06	8.96997	NOD2_GMTP-WT_GMTP
ENSMUSG00000040430.18	Pitpnc1	1.0851	6.19453	11.948	3.64722382210778e-08	1.39111974602891e-06	8.89981	NOD2_GMTP-WT_GMTP
ENSMUSG00000029816.10	Gpnmb	0.608183	14.3924	11.9281	3.71769587489812e-08	1.41557931837204e-06	8.85096	NOD2_GMTP-WT_GMTP
ENSMUSG00000110235.1	Gm5086	1.64124	2.55961	11.9115	3.77738058894961e-08	1.43585507804485e-06	9.18494	NOD2_GMTP-WT_GMTP
ENSMUSG00000040699.13	Limd2	-0.788326	6.98997	-11.9003	3.81850670539866e-08	1.44796418108464e-06	8.82785	NOD2_GMTP-WT_GMTP
ENSMUSG00000030966.13	Trim21	-0.670159	5.75744	-11.8993	3.82221531241362e-08	1.44796418108464e-06	8.86734	NOD2_GMTP-WT_GMTP
ENSMUSG00000029254.16	Stap1	-0.927662	6.35329	-11.8845	3.87697331806013e-08	1.46621873976061e-06	8.8298	NOD2_GMTP-WT_GMTP
ENSMUSG00000015947.10	Fcgr1	-0.581558	9.2285	-11.8794	3.89609867861154e-08	1.46865128445495e-06	8.77462	NOD2_GMTP-WT_GMTP
ENSMUSG00000016552.13	Foxred2	0.805923	5.02784	11.8787	3.89861988028739e-08	1.46865128445495e-06	8.8854	NOD2_GMTP-WT_GMTP
ENSMUSG00000024677.13	Ms4a6b	-0.758014	7.54177	-11.8775	3.9031515783704e-08	1.46865128445495e-06	8.79271	NOD2_GMTP-WT_GMTP
ENSMUSG00000040296.15	Ddx58	-0.851292	7.40725	-11.8531	3.99619414624089e-08	1.501129292678e-06	8.77037	NOD2_GMTP-WT_GMTP
ENSMUSG00000030246.12	Ldhb	1.05848	3.71742	11.8503	4.00727288687757e-08	1.50276100714116e-06	8.98018	NOD2_GMTP-WT_GMTP
ENSMUSG00000066677.12	Ifi208	-1.6265	4.00696	-11.798	4.21547562211861e-08	1.57818636839484e-06	8.89358	NOD2_GMTP-WT_GMTP
ENSMUSG00000024899.7	Papss2	0.613731	4.36568	11.7738	4.3155940740312e-08	1.61215661865452e-06	8.83142	NOD2_GMTP-WT_GMTP
ENSMUSG00000003420.8	Fcgrt	0.930905	5.74097	11.7726	4.32066355019676e-08	1.61215661865452e-06	8.73852	NOD2_GMTP-WT_GMTP
ENSMUSG00000021770.11	Samd8	0.923462	6.56868	11.7691	4.33525933150783e-08	1.61490219472344e-06	8.70493	NOD2_GMTP-WT_GMTP
ENSMUSG00000034957.10	Cebpa	0.737993	7.98422	11.7616	4.36701849387351e-08	1.62204313404932e-06	8.66628	NOD2_GMTP-WT_GMTP
ENSMUSG00000039994.15	Timeless	-1.00412	3.2445	-11.7612	4.36896842004052e-08	1.62204313404932e-06	8.94971	NOD2_GMTP-WT_GMTP
ENSMUSG00000039652.16	Cpeb3	0.845404	4.16868	11.7585	4.38041583899827e-08	1.62359167135496e-06	8.83558	NOD2_GMTP-WT_GMTP
ENSMUSG00000022637.11	Cblb	0.781781	7.26074	11.7561	4.39074389329859e-08	1.62472087050036e-06	8.67382	NOD2_GMTP-WT_GMTP
ENSMUSG00000032667.17	Pon2	0.577007	6.79613	11.7514	4.41088557768665e-08	1.62947168700202e-06	8.68021	NOD2_GMTP-WT_GMTP
ENSMUSG00000044485.4	Klk1b11	4.10104	-0.700986	11.7363	4.4759807582524e-08	1.6507860935353e-06	9.00123	NOD2_GMTP-WT_GMTP
ENSMUSG00000004698.11	Hdac9	-1.20665	2.93616	-11.7279	4.5129912823273e-08	1.66168934789718e-06	8.95567	NOD2_GMTP-WT_GMTP
ENSMUSG00000020312.12	Shc2	1.39736	1.55689	11.702	4.62853031789074e-08	1.70142334403783e-06	9.06574	NOD2_GMTP-WT_GMTP
ENSMUSG00000030980.17	Knop1	0.782695	6.47785	11.698	4.64649278705682e-08	1.70521699930261e-06	8.63436	NOD2_GMTP-WT_GMTP
ENSMUSG00000037071.3	Scd1	1.20571	3.11431	11.6799	4.72968674510684e-08	1.73289819940179e-06	8.88403	NOD2_GMTP-WT_GMTP
ENSMUSG00000004383.18	Large1	0.594179	6.36548	11.6672	4.78890071044453e-08	1.75171707462539e-06	8.60598	NOD2_GMTP-WT_GMTP
ENSMUSG00000111818.1	Gm17749	1.27546	2.73796	11.6591	4.82674413782906e-08	1.76267008097185e-06	8.91062	NOD2_GMTP-WT_GMTP
ENSMUSG00000025790.14	Slco3a1	-1.29043	4.06179	-11.6491	4.87414908385493e-08	1.77707334163489e-06	8.73503	NOD2_GMTP-WT_GMTP
ENSMUSG00000025059.16	Gk	-0.810922	4.94713	-11.64	4.91799892777625e-08	1.79013556403706e-06	8.64595	NOD2_GMTP-WT_GMTP
ENSMUSG00000023915.5	Tnfrsf21	0.834348	5.85412	11.6302	4.96581080182008e-08	1.8045950557168e-06	8.58652	NOD2_GMTP-WT_GMTP
ENSMUSG00000030865.4	Chp2	2.6591	-0.0412629	11.6269	4.98193512591632e-08	1.80751086934262e-06	8.98793	NOD2_GMTP-WT_GMTP
ENSMUSG00000048216.13	Gpr85	-0.878969	4.128	-11.6248	4.99227539288839e-08	1.80832209158309e-06	8.70242	NOD2_GMTP-WT_GMTP
ENSMUSG00000034382.14	AI661453	-1.83562	0.373722	-11.6218	5.00672474577489e-08	1.81061668156362e-06	9.00761	NOD2_GMTP-WT_GMTP
ENSMUSG00000030609.18	Aen	-0.757054	4.05411	-11.5952	5.13931019887982e-08	1.85555709494507e-06	8.68023	NOD2_GMTP-WT_GMTP
ENSMUSG00000030894.5	Tpp1	0.525946	8.57672	11.5926	5.15286004712108e-08	1.85744371940893e-06	8.48355	NOD2_GMTP-WT_GMTP
ENSMUSG00000027358.6	Bmp2	2.75328	0.689546	11.5831	5.20097543359533e-08	1.87176394919053e-06	8.97616	NOD2_GMTP-WT_GMTP
ENSMUSG00000063694.5	Cycs	-0.933744	5.86602	-11.5791	5.221500633434e-08	1.87612469619667e-06	8.53291	NOD2_GMTP-WT_GMTP
ENSMUSG00000031826.20	Usp10	-0.710501	4.17626	-11.5767	5.23408637574051e-08	1.8776233006736e-06	8.64763	NOD2_GMTP-WT_GMTP
ENSMUSG00000059895.13	Ptp4a3	-1.2291	2.31044	-11.561	5.31561696936147e-08	1.90380997491754e-06	8.86042	NOD2_GMTP-WT_GMTP
ENSMUSG00000071713.6	Csf2rb	0.560143	9.2542	11.5264	5.5005415340448e-08	1.96688434694137e-06	8.40903	NOD2_GMTP-WT_GMTP
ENSMUSG00000056394.17	Lig1	-0.835104	4.62309	-11.511	5.58514409796223e-08	1.9939411241253e-06	8.53668	NOD2_GMTP-WT_GMTP
ENSMUSG00000025001.11	Hells	-1.37479	2.44532	-11.5062	5.61205100781184e-08	2.00034655171415e-06	8.78955	NOD2_GMTP-WT_GMTP
ENSMUSG00000026228.6	Htr2b	1.22332	2.7216	11.5015	5.63785028525276e-08	2.0063373750374e-06	8.7517	NOD2_GMTP-WT_GMTP
ENSMUSG00000087259.7	2610035D17Rik	1.20055	2.41359	11.4993	5.65017254749687e-08	2.00752070146971e-06	8.78616	NOD2_GMTP-WT_GMTP
ENSMUSG00000015709.9	Arnt2	3.20885	-0.432018	11.4909	5.69774701982333e-08	2.02114259097989e-06	8.81962	NOD2_GMTP-WT_GMTP
ENSMUSG00000030774.13	Pak1	-0.547401	6.63451	-11.4893	5.70662767139037e-08	2.02114259097989e-06	8.41218	NOD2_GMTP-WT_GMTP
ENSMUSG00000017412.15	Cacnb4	1.82902	0.659604	11.4645	5.84919204477695e-08	2.06561554225923e-06	8.86036	NOD2_GMTP-WT_GMTP
ENSMUSG00000102715.1	Gm6209	1.95644	1.72814	11.4629	5.85838997717431e-08	2.06561554225923e-06	8.81494	NOD2_GMTP-WT_GMTP
ENSMUSG00000025283.15	Sat1	0.597611	8.76915	11.4626	5.85996790324068e-08	2.06561554225923e-06	8.34543	NOD2_GMTP-WT_GMTP
ENSMUSG00000021830.14	Txndc16	0.798186	5.85595	11.4578	5.88817037309483e-08	2.07228305260039e-06	8.4063	NOD2_GMTP-WT_GMTP
ENSMUSG00000030208.15	Emp1	0.539355	7.61139	11.4517	5.92403216316786e-08	2.0816209394766e-06	8.3495	NOD2_GMTP-WT_GMTP
ENSMUSG00000044749.13	Abca6	2.70771	-0.169933	11.4439	5.96994442000413e-08	2.09445550068478e-06	8.80443	NOD2_GMTP-WT_GMTP
ENSMUSG00000068264.11	Ap5s1	0.751019	4.58554	11.4281	6.06490775363271e-08	2.12443150246164e-06	8.45289	NOD2_GMTP-WT_GMTP
ENSMUSG00000029455.14	Aldh2	0.627439	9.59938	11.4216	6.10427005072566e-08	2.13486798811664e-06	8.29707	NOD2_GMTP-WT_GMTP
ENSMUSG00000081778.1	Gm6325	1.78299	1.13677	11.4171	6.13146695717915e-08	2.14102382183941e-06	8.80395	NOD2_GMTP-WT_GMTP
ENSMUSG00000024378.9	Stard4	-0.969749	4.99889	-11.4006	6.23372832381914e-08	2.17333093889651e-06	8.39207	NOD2_GMTP-WT_GMTP
ENSMUSG00000071172.13	Srsf3	-0.62024	6.41877	-11.3976	6.25229386089212e-08	2.17640300964252e-06	8.32214	NOD2_GMTP-WT_GMTP
ENSMUSG00000068245.14	Phf11d	-1.09187	5.8212	-11.39	6.29959286701498e-08	2.18945195703591e-06	8.33641	NOD2_GMTP-WT_GMTP
ENSMUSG00000026748.13	Plxdc2	0.96636	5.24816	11.3828	6.34520708241257e-08	2.20187567076006e-06	8.35746	NOD2_GMTP-WT_GMTP
ENSMUSG00000029385.14	Ccng2	0.576886	5.61703	11.3727	6.40976030549443e-08	2.22082269715058e-06	8.32733	NOD2_GMTP-WT_GMTP
ENSMUSG00000063146.11	Clip2	-0.578268	5.83266	-11.3688	6.43514109245838e-08	2.22615973947324e-06	8.31339	NOD2_GMTP-WT_GMTP
ENSMUSG00000008845.9	Cd163	2.24369	0.655526	11.3561	6.51716923412709e-08	2.25104639506312e-06	8.75372	NOD2_GMTP-WT_GMTP
ENSMUSG00000038178.16	Slc43a2	0.6483	8.93033	11.3463	6.58162409812889e-08	2.26778430811646e-06	8.22097	NOD2_GMTP-WT_GMTP
ENSMUSG00000034570.12	Inpp5j	1.17794	3.40026	11.3456	6.58595541459896e-08	2.26778430811646e-06	8.50071	NOD2_GMTP-WT_GMTP
ENSMUSG00000041132.11	N4bp2l1	0.698718	5.38683	11.3353	6.65444119683047e-08	2.28783584630013e-06	8.29953	NOD2_GMTP-WT_GMTP
ENSMUSG00000026628.13	Atf3	0.486334	9.04504	11.3314	6.6803671794573e-08	2.29321589038817e-06	8.20437	NOD2_GMTP-WT_GMTP
ENSMUSG00000079057.4	Cyp4v3	0.495757	7.63856	11.3288	6.69846566170337e-08	2.29589653317339e-06	8.21884	NOD2_GMTP-WT_GMTP
ENSMUSG00000026088.15	Mitd1	-0.853626	3.93521	-11.3179	6.77205358594965e-08	2.31536025425061e-06	8.40367	NOD2_GMTP-WT_GMTP
ENSMUSG00000072568.4	Lratd2	0.814976	5.21076	11.3173	6.77600612210661e-08	2.31536025425061e-06	8.29033	NOD2_GMTP-WT_GMTP
ENSMUSG00000038894.7	Irs2	0.990727	4.29078	11.3128	6.80682010234035e-08	2.32233298078777e-06	8.35943	NOD2_GMTP-WT_GMTP
ENSMUSG00000014778.10	Fhod1	-0.886374	4.85438	-11.3096	6.82837684167662e-08	2.32613087737909e-06	8.30628	NOD2_GMTP-WT_GMTP
ENSMUSG00000022636.13	Alcam	0.537987	8.4365	11.3008	6.88966348444682e-08	2.34343081293387e-06	8.17723	NOD2_GMTP-WT_GMTP
ENSMUSG00000040345.10	Arhgap9	0.721058	7.85476	11.2873	6.98333189654534e-08	2.3716755648039e-06	8.17095	NOD2_GMTP-WT_GMTP
ENSMUSG00000027630.13	Tbl1xr1	0.916592	6.57161	11.2792	7.04075733478192e-08	2.38754435275059e-06	8.19163	NOD2_GMTP-WT_GMTP
ENSMUSG00000027130.15	Slc12a6	0.609435	5.94846	11.276	7.063488083584e-08	2.39161774823991e-06	8.21004	NOD2_GMTP-WT_GMTP
ENSMUSG00000033355.6	Rtp4	-0.748615	7.87134	-11.271	7.09906694181681e-08	2.40002243443574e-06	8.15327	NOD2_GMTP-WT_GMTP
ENSMUSG00000080316.11	Spaca6	-1.75077	1.76233	-11.2694	7.1107507623304e-08	2.40033557881813e-06	8.61492	NOD2_GMTP-WT_GMTP
ENSMUSG00000086109.2	Gm13391	1.67026	1.2564	11.2602	7.17709331097201e-08	2.41907074090209e-06	8.64031	NOD2_GMTP-WT_GMTP
ENSMUSG00000032261.16	Sh3bgrl2	0.585888	6.25587	11.2535	7.22593673113091e-08	2.4309847478959e-06	8.17442	NOD2_GMTP-WT_GMTP
ENSMUSG00000027204.13	Fbn1	-2.07767	1.6779	-11.2523	7.23423059473346e-08	2.4309847478959e-06	8.60432	NOD2_GMTP-WT_GMTP
ENSMUSG00000008540.11	Mgst1	0.680322	6.25142	11.2472	7.27179863815697e-08	2.43686177216437e-06	8.16789	NOD2_GMTP-WT_GMTP
ENSMUSG00000024197.10	Plin3	0.659046	7.34307	11.2455	7.28422053692737e-08	2.43686177216437e-06	8.13594	NOD2_GMTP-WT_GMTP
ENSMUSG00000022010.19	Tsc22d1	0.616949	6.04294	11.2455	7.28448349407804e-08	2.43686177216437e-06	8.17371	NOD2_GMTP-WT_GMTP
ENSMUSG00000074785.5	Plxnc1	0.765534	8.01759	11.2371	7.34658291032329e-08	2.45395665386293e-06	8.11468	NOD2_GMTP-WT_GMTP
ENSMUSG00000004266.15	Ptpn6	-0.550324	8.89362	-11.2345	7.3656811146841e-08	2.45665833650144e-06	8.10196	NOD2_GMTP-WT_GMTP
ENSMUSG00000037940.17	Inpp4b	-1.49126	1.64016	-11.2324	7.38113670928628e-08	2.45813885663142e-06	8.58685	NOD2_GMTP-WT_GMTP
ENSMUSG00000030737.17	Slco2b1	0.973764	3.92491	11.2125	7.53171599095865e-08	2.50454812080865e-06	8.29317	NOD2_GMTP-WT_GMTP
ENSMUSG00000029366.10	Dck	-0.670569	7.09448	-11.2055	7.58531978321923e-08	2.51861964766325e-06	8.09869	NOD2_GMTP-WT_GMTP
ENSMUSG00000032788.15	Pdxk	0.798064	7.87636	11.1963	7.65631747253321e-08	2.53841622235711e-06	8.07312	NOD2_GMTP-WT_GMTP
ENSMUSG00000031848.15	Lsm4	-0.886154	5.19382	-11.1822	7.7666986256308e-08	2.57119208358605e-06	8.14727	NOD2_GMTP-WT_GMTP
ENSMUSG00000066510.5	Ankdd1a	1.45623	2.05453	11.1617	7.93004240424517e-08	2.62083220246289e-06	8.4762	NOD2_GMTP-WT_GMTP
ENSMUSG00000039671.18	Zmynd8	0.617054	7.19579	11.1604	7.94013610390763e-08	2.62083220246289e-06	8.04784	NOD2_GMTP-WT_GMTP
ENSMUSG00000032883.15	Acsl3	-0.688898	4.32216	-11.1567	7.97069743958879e-08	2.62699370987575e-06	8.18991	NOD2_GMTP-WT_GMTP
ENSMUSG00000085129.1	5031425F14Rik	2.13592	1.2524	11.1552	7.9823499094508e-08	2.62699370987575e-06	8.53344	NOD2_GMTP-WT_GMTP
ENSMUSG00000021175.15	Cdca7l	0.667762	4.73437	11.1352	8.14656240762211e-08	2.67549859056175e-06	8.12937	NOD2_GMTP-WT_GMTP
ENSMUSG00000032596.14	Uba7	-0.684167	7.0521	-11.1337	8.15938214541974e-08	2.67549859056175e-06	8.02243	NOD2_GMTP-WT_GMTP
ENSMUSG00000026880.11	Stom	0.508557	8.98584	11.1329	8.16570851150698e-08	2.67549859056175e-06	7.99195	NOD2_GMTP-WT_GMTP
ENSMUSG00000025582.4	Nptx1	-3.72809	-0.0902993	-11.13	8.18972262221121e-08	2.6794322708123e-06	8.50877	NOD2_GMTP-WT_GMTP
ENSMUSG00000098188.1	Sowahc	0.632922	5.85229	11.1254	8.22845984982543e-08	2.68784188769103e-06	8.05251	NOD2_GMTP-WT_GMTP
ENSMUSG00000029925.13	Tbxas1	0.651508	6.83655	11.1241	8.23951889562436e-08	2.68784188769103e-06	8.01761	NOD2_GMTP-WT_GMTP
ENSMUSG00000023019.12	Gpd1	1.45152	1.76854	11.1223	8.25420792650544e-08	2.68870279509658e-06	8.46232	NOD2_GMTP-WT_GMTP
ENSMUSG00000043415.5	Otud1	-0.781901	4.45263	-11.1179	8.29194612821701e-08	2.69705822097531e-06	8.13562	NOD2_GMTP-WT_GMTP
ENSMUSG00000031925.17	Maml2	0.99235	3.91701	11.096	8.47937866399165e-08	2.7540083861666e-06	8.16959	NOD2_GMTP-WT_GMTP
ENSMUSG00000046879.7	Irgm1	-0.719473	7.65827	-11.0939	8.49715058328569e-08	2.75576920007055e-06	7.96647	NOD2_GMTP-WT_GMTP
ENSMUSG00000028885.8	Smpdl3b	-1.45401	2.86724	-11.0892	8.53805768161259e-08	2.76501714150685e-06	8.30188	NOD2_GMTP-WT_GMTP
ENSMUSG00000020901.13	Pik3r5	-0.503432	8.14956	-11.0872	8.55523508946274e-08	2.76656464566931e-06	7.95138	NOD2_GMTP-WT_GMTP
ENSMUSG00000038967.13	Pdk2	0.829567	3.9824	11.0812	8.60867581557245e-08	2.77981741639462e-06	8.14612	NOD2_GMTP-WT_GMTP
ENSMUSG00000029328.15	Hnrnpdl	-0.594784	6.10095	-11.0761	8.65348789803451e-08	2.79024964550353e-06	7.98918	NOD2_GMTP-WT_GMTP
ENSMUSG00000028156.12	Eif4e	-0.716058	5.69293	-11.0739	8.67293737294482e-08	2.79248559310993e-06	8.00394	NOD2_GMTP-WT_GMTP
ENSMUSG00000059013.12	Sh2d3c	0.684912	5.52591	11.0638	8.76257124683303e-08	2.81728029150699e-06	8.00131	NOD2_GMTP-WT_GMTP
ENSMUSG00000045502.6	Hcar2	-3.06877	0.161636	-11.0617	8.78200196567729e-08	2.81946489007421e-06	8.45401	NOD2_GMTP-WT_GMTP
ENSMUSG00000027219.13	Slc28a2	-0.674885	5.94409	-11.022	9.14659920182064e-08	2.93229982744574e-06	7.93679	NOD2_GMTP-WT_GMTP
ENSMUSG00000020085.15	Aifm2	0.597398	4.74322	11.0189	9.17566304149392e-08	2.93444501339598e-06	8.00309	NOD2_GMTP-WT_GMTP
ENSMUSG00000000320.10	Alox12	3.12355	-1.52425	11.0185	9.17959314906286e-08	2.93444501339598e-06	8.17212	NOD2_GMTP-WT_GMTP
ENSMUSG00000004568.13	Arhgef18	1.27754	2.6406	11.0157	9.20668491754354e-08	2.93889500093203e-06	8.25343	NOD2_GMTP-WT_GMTP
ENSMUSG00000078429.9	Ctdsp2	0.636325	7.5551	11.0107	9.25344450231942e-08	2.94960153114648e-06	7.87809	NOD2_GMTP-WT_GMTP
ENSMUSG00000009654.4	Oit3	0.853153	3.61127	11.0062	9.29680849314034e-08	2.95919668912183e-06	8.11172	NOD2_GMTP-WT_GMTP
ENSMUSG00000027347.18	Rasgrp1	-3.228	0.399137	-11.0022	9.33506594873532e-08	2.96613808953256e-06	8.39937	NOD2_GMTP-WT_GMTP
ENSMUSG00000040548.16	Tex2	0.568518	5.8634	11.0011	9.34520269323441e-08	2.96613808953256e-06	7.91738	NOD2_GMTP-WT_GMTP
ENSMUSG00000069874.7	Irgm2	-0.722384	6.68985	-10.9934	9.41936700339808e-08	2.98148450562291e-06	7.87998	NOD2_GMTP-WT_GMTP
ENSMUSG00000063193.9	Cd300lb	0.513404	8.3542	10.9934	9.42027775944135e-08	2.98148450562291e-06	7.8466	NOD2_GMTP-WT_GMTP
ENSMUSG00000004730.15	Adgre1	-0.535067	11.23	-10.9899	9.45362309905302e-08	2.98780017293442e-06	7.83459	NOD2_GMTP-WT_GMTP
ENSMUSG00000055184.4	Fam72a	-1.97183	1.48325	-10.9833	9.51854964318978e-08	3.00406503802678e-06	8.34045	NOD2_GMTP-WT_GMTP
ENSMUSG00000004665.10	Cnn2	0.689925	4.73388	10.9785	9.56556109547637e-08	3.01463791982153e-06	7.95996	NOD2_GMTP-WT_GMTP
ENSMUSG00000023004.8	Tuba1b	-0.705977	6.54026	-10.9752	9.59819173031944e-08	3.02065517741351e-06	7.86449	NOD2_GMTP-WT_GMTP
ENSMUSG00000046027.17	Stard5	0.617834	5.66723	10.9646	9.70369561196284e-08	3.0495571857708e-06	7.88633	NOD2_GMTP-WT_GMTP
ENSMUSG00000022500.15	Litaf	0.544061	8.91371	10.9602	9.7480399939213e-08	3.05918447797983e-06	7.80469	NOD2_GMTP-WT_GMTP
ENSMUSG00000057530.14	Ece1	-1.03251	4.37348	-10.9584	9.76599007082459e-08	3.06051315239198e-06	7.97061	NOD2_GMTP-WT_GMTP
ENSMUSG00000045092.8	S1pr1	0.669244	4.73808	10.9554	9.79578445331829e-08	3.06554471959174e-06	7.93451	NOD2_GMTP-WT_GMTP
ENSMUSG00000020638.8	Cmpk2	-0.798849	7.67576	-10.9528	9.82209234701599e-08	3.06947264060179e-06	7.8126	NOD2_GMTP-WT_GMTP
ENSMUSG00000025190.13	Got1	0.534113	6.36103	10.9494	9.85668241250243e-08	3.07597419119114e-06	7.84215	NOD2_GMTP-WT_GMTP
ENSMUSG00000010358.13	Ifi35	-0.943726	5.16499	-10.9478	9.87370659449814e-08	3.07698345311504e-06	7.89553	NOD2_GMTP-WT_GMTP
ENSMUSG00000001630.13	Stk38l	-1.02533	3.42848	-10.9421	9.93124532855535e-08	3.09059800580273e-06	8.06696	NOD2_GMTP-WT_GMTP
ENSMUSG00000031862.11	Atp13a1	-0.603426	6.3997	-10.9297	1.00594783084466e-07	3.1261440041277e-06	7.81934	NOD2_GMTP-WT_GMTP
ENSMUSG00000055541.17	Lair1	-0.555968	7.73012	-10.9273	1.00849603717053e-07	3.12970404414271e-06	7.78365	NOD2_GMTP-WT_GMTP
ENSMUSG00000034522.10	Zfp395	0.705921	5.43375	10.9169	1.01943464467954e-07	3.1592562814909e-06	7.84602	NOD2_GMTP-WT_GMTP
ENSMUSG00000003518.13	Dusp3	0.543061	7.941	10.9077	1.02913334799802e-07	3.18488937501802e-06	7.75863	NOD2_GMTP-WT_GMTP
ENSMUSG00000052459.13	Atp6v1a	0.51055	10.1279	10.9055	1.03150796541022e-07	3.18781679116319e-06	7.73979	NOD2_GMTP-WT_GMTP
ENSMUSG00000004113.18	Cacna1b	1.2849	2.08828	10.9013	1.03605162498339e-07	3.1955398884424e-06	8.19799	NOD2_GMTP-WT_GMTP
ENSMUSG00000031563.8	Wwc2	-0.681006	4.96235	-10.9005	1.03687127649007e-07	3.1955398884424e-06	7.85745	NOD2_GMTP-WT_GMTP
ENSMUSG00000032254.10	Kif23	0.811637	4.18924	10.895	1.04279691453584e-07	3.20936931779837e-06	7.92089	NOD2_GMTP-WT_GMTP
ENSMUSG00000030592.18	Ryr1	2.01712	1.29413	10.8893	1.04896182421218e-07	3.22389603080529e-06	8.25525	NOD2_GMTP-WT_GMTP
ENSMUSG00000038332.13	Sesn1	0.654407	7.67607	10.8744	1.06537546078958e-07	3.26754861296152e-06	7.72645	NOD2_GMTP-WT_GMTP
ENSMUSG00000028163.17	Nfkb1	-0.475299	6.99739	-10.8737	1.06609393189441e-07	3.26754861296152e-06	7.74047	NOD2_GMTP-WT_GMTP
ENSMUSG00000031349.4	Nsdhl	-0.89605	4.1648	-10.8714	1.06869547069077e-07	3.27102908608e-06	7.89762	NOD2_GMTP-WT_GMTP
ENSMUSG00000026113.17	Inpp4a	0.743161	5.88794	10.87	1.07023462172672e-07	3.27125275542305e-06	7.77283	NOD2_GMTP-WT_GMTP
ENSMUSG00000033318.7	Gstt2	1.04253	2.53311	10.8684	1.07204182035283e-07	3.27229399966247e-06	8.10963	NOD2_GMTP-WT_GMTP
ENSMUSG00000039126.10	Prune2	1.10851	4.81878	10.8558	1.08618768321755e-07	3.31094341197173e-06	7.81887	NOD2_GMTP-WT_GMTP
ENSMUSG00000031824.15	6430548M08Rik	0.678857	5.93852	10.8522	1.09021590873806e-07	3.31868861823632e-06	7.75121	NOD2_GMTP-WT_GMTP
ENSMUSG00000024789.13	Jak2	-0.761182	6.02556	-10.8366	1.10801602680197e-07	3.36827814796082e-06	7.73057	NOD2_GMTP-WT_GMTP
ENSMUSG00000056130.10	Ticam2	0.683046	5.56051	10.8256	1.12083310436161e-07	3.40260531396199e-06	7.73924	NOD2_GMTP-WT_GMTP
ENSMUSG00000029174.18	Tbc1d1	0.558308	5.86166	10.814	1.13448989009568e-07	3.43938490729685e-06	7.71228	NOD2_GMTP-WT_GMTP
ENSMUSG00000029482.4	Aacs	-0.763377	4.87186	-10.8117	1.13719361721022e-07	3.44290382371937e-06	7.76654	NOD2_GMTP-WT_GMTP
ENSMUSG00000073489.6	Ifi204	-0.616118	8.47493	-10.809	1.14036799018681e-07	3.44407876212365e-06	7.64259	NOD2_GMTP-WT_GMTP
ENSMUSG00000073421.6	H2-Ab1	0.753651	10.4465	10.8088	1.14066876045775e-07	3.44407876212365e-06	7.6332	NOD2_GMTP-WT_GMTP
ENSMUSG00000022508.5	Bcl6	-0.52277	6.50671	-10.8032	1.14731167981415e-07	3.45945479887743e-06	7.67661	NOD2_GMTP-WT_GMTP
ENSMUSG00000038147.13	Cd84	0.518613	9.77394	10.8013	1.14960795050954e-07	3.46170070171652e-06	7.62535	NOD2_GMTP-WT_GMTP
ENSMUSG00000055491.14	Pprc1	-0.665735	4.95875	-10.7914	1.16162088680461e-07	3.49315995246244e-06	7.73771	NOD2_GMTP-WT_GMTP
ENSMUSG00000028646.16	Rragc	0.529198	7.85065	10.7891	1.16433756720564e-07	3.49661697672402e-06	7.62921	NOD2_GMTP-WT_GMTP
ENSMUSG00000026317.7	Cln8	0.443498	8.02945	10.7868	1.16719180040859e-07	3.50047723689744e-06	7.6238	NOD2_GMTP-WT_GMTP
ENSMUSG00000020629.12	Adi1	0.630624	5.41713	10.7842	1.17031453881396e-07	3.50513131604777e-06	7.70101	NOD2_GMTP-WT_GMTP
ENSMUSG00000045896.14	Paip2b	0.669792	4.78173	10.7704	1.18732282790016e-07	3.55130486044723e-06	7.72776	NOD2_GMTP-WT_GMTP
ENSMUSG00000024897.9	Apba1	0.769677	4.80762	10.767	1.19162626731046e-07	3.5594052078311e-06	7.72187	NOD2_GMTP-WT_GMTP
ENSMUSG00000035900.18	Gramd4	0.863404	3.87073	10.7639	1.19551321726625e-07	3.56624149958046e-06	7.81433	NOD2_GMTP-WT_GMTP
ENSMUSG00000022033.9	Pbk	-1.26647	1.68504	-10.7617	1.19826766867122e-07	3.56968577984793e-06	8.08935	NOD2_GMTP-WT_GMTP
ENSMUSG00000016664.16	Pacsin2	-0.478891	6.74389	-10.7476	1.21603783872161e-07	3.61779363938605e-06	7.60785	NOD2_GMTP-WT_GMTP
ENSMUSG00000053338.9	Tarm1	-4.31224	-1.90938	-10.7414	1.22408362344306e-07	3.63283481627452e-06	7.81134	NOD2_GMTP-WT_GMTP
ENSMUSG00000001415.10	Smg5	-0.601277	5.49761	-10.7412	1.22434983276047e-07	3.63283481627452e-06	7.64899	NOD2_GMTP-WT_GMTP
ENSMUSG00000042029.7	Ncapg2	0.656591	6.41997	10.7376	1.22888699471682e-07	3.6414549154205e-06	7.60671	NOD2_GMTP-WT_GMTP
ENSMUSG00000029204.7	Rhoh	0.907983	3.95455	10.7355	1.23157080360285e-07	3.64456755182895e-06	7.77269	NOD2_GMTP-WT_GMTP
ENSMUSG00000037649.10	H2-DMa	0.816793	6.98191	10.7306	1.23800740741191e-07	3.65876281875257e-06	7.58246	NOD2_GMTP-WT_GMTP
ENSMUSG00000033174.17	Mgll	0.849575	5.84446	10.728	1.24138174332858e-07	3.66388238609663e-06	7.61777	NOD2_GMTP-WT_GMTP
ENSMUSG00000039176.17	Polg	-0.587605	5.32467	-10.7253	1.24493487528699e-07	3.66951543887431e-06	7.6409	NOD2_GMTP-WT_GMTP
ENSMUSG00000027074.14	Slc43a3	-1.13465	2.39846	-10.7224	1.24864205318368e-07	3.67558708874505e-06	7.96887	NOD2_GMTP-WT_GMTP
ENSMUSG00000022906.15	Parp9	-0.600093	7.16714	-10.7051	1.27158507306861e-07	3.73819205999736e-06	7.54958	NOD2_GMTP-WT_GMTP
ENSMUSG00000023022.14	Lima1	0.539414	6.46156	10.6956	1.2844665559007e-07	3.77109240287004e-06	7.5585	NOD2_GMTP-WT_GMTP
ENSMUSG00000076617.9	Ighm	1.38254	2.74975	10.6865	1.29676297431161e-07	3.80219083387843e-06	7.88316	NOD2_GMTP-WT_GMTP
ENSMUSG00000045973.18	Slc25a51	0.474916	6.21049	10.675	1.31258034335936e-07	3.84351774296291e-06	7.54419	NOD2_GMTP-WT_GMTP
ENSMUSG00000001053.15	N4bp3	0.946341	3.06004	10.6704	1.31903725162468e-07	3.85736280412862e-06	7.82179	NOD2_GMTP-WT_GMTP
ENSMUSG00000023067.14	Cdkn1a	-0.641902	7.0307	-10.6422	1.35883136254059e-07	3.96853458015291e-06	7.48259	NOD2_GMTP-WT_GMTP
ENSMUSG00000020089.8	Ppa1	-0.951165	3.16606	-10.6339	1.37081651483858e-07	3.99381624918695e-06	7.76663	NOD2_GMTP-WT_GMTP
ENSMUSG00000001999.15	Blvra	0.621049	6.66656	10.633	1.37211255785523e-07	3.99381624918695e-06	7.48224	NOD2_GMTP-WT_GMTP
ENSMUSG00000055805.15	Fmnl1	-0.521919	7.4768	-10.6325	1.3728575552935e-07	3.99381624918695e-06	7.46156	NOD2_GMTP-WT_GMTP
ENSMUSG00000029798.11	Herc6	-1.01375	5.93466	-10.6295	1.37718278076993e-07	4.00118221189054e-06	7.50405	NOD2_GMTP-WT_GMTP
ENSMUSG00000034416.18	Pkd1l2	1.4521	0.895531	10.6213	1.38929461076238e-07	4.03112232118869e-06	7.9946	NOD2_GMTP-WT_GMTP
ENSMUSG00000020227.10	Irak3	-0.56453	5.05089	-10.6021	1.41776011769692e-07	4.10356650456707e-06	7.52066	NOD2_GMTP-WT_GMTP
ENSMUSG00000049988.5	Lrrc25	-0.609837	7.61152	-10.602	1.41794011339632e-07	4.10356650456707e-06	7.42462	NOD2_GMTP-WT_GMTP
ENSMUSG00000040253.15	Gbp7	-0.870915	5.52666	-10.5972	1.4251653490837e-07	4.11524285210029e-06	7.48686	NOD2_GMTP-WT_GMTP
ENSMUSG00000032911.6	Cspg4	-4.7251	-2.08169	-10.5969	1.42566339115024e-07	4.11524285210029e-06	7.62621	NOD2_GMTP-WT_GMTP
ENSMUSG00000040268.17	Plekha1	0.543235	6.88162	10.5908	1.43482312248642e-07	4.13633182584488e-06	7.42882	NOD2_GMTP-WT_GMTP
ENSMUSG00000028211.11	Trp53inp1	0.756804	5.81703	10.5824	1.44776262355762e-07	4.16824869928275e-06	7.45624	NOD2_GMTP-WT_GMTP
ENSMUSG00000018217.12	Pmp22	0.522277	8.22149	10.5625	1.47876225721678e-07	4.2520131759379e-06	7.37022	NOD2_GMTP-WT_GMTP
ENSMUSG00000045932.12	Ifit2	-1.07662	9.30263	-10.5587	1.48466696887876e-07	4.26349730715467e-06	7.35596	NOD2_GMTP-WT_GMTP
ENSMUSG00000029863.13	Casp2	0.632705	5.0195	10.5533	1.4932120901675e-07	4.28243474088332e-06	7.46794	NOD2_GMTP-WT_GMTP
ENSMUSG00000000184.12	Ccnd2	-2.04441	1.10153	-10.5521	1.49510001485596e-07	4.28243474088332e-06	7.90963	NOD2_GMTP-WT_GMTP
ENSMUSG00000033319.5	Fem1c	0.707441	6.53779	10.5499	1.49870754647439e-07	4.28726429288245e-06	7.39261	NOD2_GMTP-WT_GMTP
ENSMUSG00000072769.6	Gm10419	0.695309	3.03319	10.5481	1.50151825259589e-07	4.28980496417057e-06	7.69036	NOD2_GMTP-WT_GMTP
ENSMUSG00000015568.16	Lpl	-0.603954	12.0857	-10.5435	1.50892410371745e-07	4.30545057880402e-06	7.34404	NOD2_GMTP-WT_GMTP
ENSMUSG00000048534.7	Jaml	2.17449	-0.408201	10.5391	1.51607443932095e-07	4.32032809253747e-06	7.89721	NOD2_GMTP-WT_GMTP
ENSMUSG00000079523.8	Tmsb10	0.716284	8.50537	10.5323	1.527077677532e-07	4.34171286742868e-06	7.33261	NOD2_GMTP-WT_GMTP
ENSMUSG00000029923.4	Rab19	0.669773	4.47056	10.532	1.527470354023e-07	4.34171286742868e-06	7.48967	NOD2_GMTP-WT_GMTP
ENSMUSG00000020681.14	Ace	2.0065	-0.474069	10.5287	1.53289099189606e-07	4.34764429424928e-06	7.88146	NOD2_GMTP-WT_GMTP
ENSMUSG00000028550.15	Atg4c	0.578954	5.10528	10.5284	1.53345406694491e-07	4.34764429424928e-06	7.43416	NOD2_GMTP-WT_GMTP
ENSMUSG00000063268.12	Parp10	-0.636358	5.94373	-10.515	1.55545938019333e-07	4.40443720180885e-06	7.37482	NOD2_GMTP-WT_GMTP
ENSMUSG00000037553.14	Zdhhc18	-0.640363	5.42511	-10.4925	1.5932854618551e-07	4.50582744111189e-06	7.37424	NOD2_GMTP-WT_GMTP
ENSMUSG00000022562.15	Oplah	1.11338	2.07279	10.4736	1.62585442474434e-07	4.59211263029372e-06	7.73586	NOD2_GMTP-WT_GMTP
ENSMUSG00000029472.13	Anapc5	-0.502113	7.59581	-10.4627	1.64498111984923e-07	4.64026090103614e-06	7.26748	NOD2_GMTP-WT_GMTP
ENSMUSG00000097354.7	2310001H17Rik	0.929901	3.0331	10.4615	1.64719088990792e-07	4.64062756647922e-06	7.59366	NOD2_GMTP-WT_GMTP
ENSMUSG00000038175.10	Mylip	0.519559	6.48867	10.4591	1.65128888945345e-07	4.64630630395648e-06	7.29152	NOD2_GMTP-WT_GMTP
ENSMUSG00000001123.15	Lgals9	-0.522859	7.65155	-10.4521	1.66374615428108e-07	4.67001192279024e-06	7.25439	NOD2_GMTP-WT_GMTP
ENSMUSG00000020263.14	Appl2	0.586279	6.23456	10.4521	1.66389973496089e-07	4.67001192279024e-06	7.29217	NOD2_GMTP-WT_GMTP
ENSMUSG00000038507.6	Parp12	-0.609472	7.29525	-10.4495	1.66851181689409e-07	4.67416441996379e-06	7.25874	NOD2_GMTP-WT_GMTP
ENSMUSG00000021133.9	Susd6	-0.545089	7.99498	-10.4489	1.66956888034381e-07	4.67416441996379e-06	7.24482	NOD2_GMTP-WT_GMTP
ENSMUSG00000044068.7	Zrsr1	0.68979	3.62511	10.4421	1.68173587946579e-07	4.70232740332334e-06	7.48775	NOD2_GMTP-WT_GMTP
ENSMUSG00000029860.16	Zyx	0.719739	6.70667	10.4345	1.69559269873434e-07	4.7351389094943e-06	7.25677	NOD2_GMTP-WT_GMTP
ENSMUSG00000046519.15	Golph3l	0.53968	6.60652	10.4298	1.70414582716861e-07	4.75307573020164e-06	7.25445	NOD2_GMTP-WT_GMTP
ENSMUSG00000002108.10	Nr1h3	-0.645748	6.77841	-10.4205	1.72126778007383e-07	4.79483745028556e-06	7.23875	NOD2_GMTP-WT_GMTP
ENSMUSG00000074272.10	Ceacam1	0.73275	3.85536	10.4129	1.73543674490792e-07	4.82827931285916e-06	7.42437	NOD2_GMTP-WT_GMTP
ENSMUSG00000039062.15	Anpep	0.612243	10.908	10.4089	1.74289310916099e-07	4.84298554728633e-06	7.18455	NOD2_GMTP-WT_GMTP
ENSMUSG00000046562.5	Unc119b	0.597016	4.55014	10.3985	1.76260431395898e-07	4.89166543002075e-06	7.3308	NOD2_GMTP-WT_GMTP
ENSMUSG00000053101.3	Gpr141	0.68354	5.66459	10.3907	1.7773603017817e-07	4.9264894923795e-06	7.24611	NOD2_GMTP-WT_GMTP
ENSMUSG00000039191.12	Rbpj	-0.778958	6.80474	-10.3647	1.82794955540442e-07	5.06042660418597e-06	7.17432	NOD2_GMTP-WT_GMTP
ENSMUSG00000090272.9	Mndal	-0.63021	7.24526	-10.3561	1.84513644842167e-07	5.10167652709204e-06	7.15321	NOD2_GMTP-WT_GMTP
ENSMUSG00000023066.10	Rttn	1.09327	3.7274	10.3499	1.85754806298821e-07	5.12963736750694e-06	7.36935	NOD2_GMTP-WT_GMTP
ENSMUSG00000068874.13	Selenbp1	1.00184	4.36443	10.344	1.86934649544593e-07	5.15583786809458e-06	7.2869	NOD2_GMTP-WT_GMTP
ENSMUSG00000001248.15	Gramd1a	-0.68918	5.40153	-10.3366	1.88431283861412e-07	5.1907002923453e-06	7.19812	NOD2_GMTP-WT_GMTP
ENSMUSG00000040713.12	Creg1	0.481919	9.75748	10.3314	1.89499249489724e-07	5.21368280377831e-06	7.09528	NOD2_GMTP-WT_GMTP
ENSMUSG00000002983.17	Relb	-0.9106	5.22293	-10.3175	1.92387428936268e-07	5.28662648011693e-06	7.18653	NOD2_GMTP-WT_GMTP
ENSMUSG00000001768.16	Rin2	0.531671	7.68045	10.3148	1.92934545346195e-07	5.29513961907706e-06	7.09685	NOD2_GMTP-WT_GMTP
ENSMUSG00000030123.15	Plxnd1	0.559551	8.92212	10.3055	1.9490354895504e-07	5.34260797031181e-06	7.06985	NOD2_GMTP-WT_GMTP
ENSMUSG00000023991.16	Foxp4	-0.822409	3.69467	-10.2991	1.96262871462391e-07	5.3732680379636e-06	7.31586	NOD2_GMTP-WT_GMTP
ENSMUSG00000002996.17	Hbp1	0.536609	6.32609	10.2979	1.96512061561354e-07	5.37345288134019e-06	7.1126	NOD2_GMTP-WT_GMTP
ENSMUSG00000004996.9	Mri1	-1.03393	3.21867	-10.2968	1.96751266259801e-07	5.37345288134019e-06	7.38088	NOD2_GMTP-WT_GMTP
ENSMUSG00000021087.18	Rtn1	-2.05439	0.414516	-10.2855	1.99179455288679e-07	5.43311880911527e-06	7.65176	NOD2_GMTP-WT_GMTP
ENSMUSG00000025792.9	Slc25a10	-0.638667	5.67076	-10.2643	2.03823395232985e-07	5.55300539418022e-06	7.10086	NOD2_GMTP-WT_GMTP
ENSMUSG00000063856.7	Gpx1	0.629417	8.92992	10.2614	2.0448003751519e-07	5.56410131350784e-06	7.01892	NOD2_GMTP-WT_GMTP
ENSMUSG00000025025.14	Mxi1	0.728986	5.03281	10.2589	2.05035153437822e-07	5.57241093624619e-06	7.13188	NOD2_GMTP-WT_GMTP
ENSMUSG00000037306.13	Man1c1	0.564764	7.77614	10.2511	2.0677052023679e-07	5.61273797815511e-06	7.02168	NOD2_GMTP-WT_GMTP
ENSMUSG00000031402.12	Mpp1	0.428705	8.29309	10.2483	2.07406105314865e-07	5.61897797871469e-06	7.0105	NOD2_GMTP-WT_GMTP
ENSMUSG00000030134.11	Rasgef1a	1.08932	3.06111	10.2479	2.07504049408905e-07	5.61897797871469e-06	7.34823	NOD2_GMTP-WT_GMTP
ENSMUSG00000074151.13	Nlrc5	-1.01384	5.8877	-10.2454	2.08077470860195e-07	5.62458812896848e-06	7.06908	NOD2_GMTP-WT_GMTP
ENSMUSG00000074874.10	Ctla2b	-2.17181	-1.49816	-10.2448	2.08215380922689e-07	5.62458812896848e-06	7.45139	NOD2_GMTP-WT_GMTP
ENSMUSG00000047821.16	Trim16	0.763567	3.92379	10.2276	2.1215280974802e-07	5.72402133483381e-06	7.20403	NOD2_GMTP-WT_GMTP
ENSMUSG00000068129.5	Cst7	-1.61926	2.22964	-10.2249	2.12765923504671e-07	5.73363049656971e-06	7.4389	NOD2_GMTP-WT_GMTP
ENSMUSG00000020091.15	Eif4ebp2	0.483816	7.56906	10.2237	2.13048866846895e-07	5.73432975386581e-06	6.99384	NOD2_GMTP-WT_GMTP
ENSMUSG00000039531.8	Zup1	-0.561287	4.55952	-10.2225	2.13337533334261e-07	5.73518118227395e-06	7.12834	NOD2_GMTP-WT_GMTP
ENSMUSG00000017144.8	Rnd3	-0.752138	4.77772	-10.2152	2.15032923588982e-07	5.77380219499513e-06	7.10079	NOD2_GMTP-WT_GMTP
ENSMUSG00000052125.16	F730043M19Rik	-1.79114	0.827493	-10.2141	2.15294622012469e-07	5.773880890582e-06	7.55851	NOD2_GMTP-WT_GMTP
ENSMUSG00000040855.15	Reps2	1.10051	6.00783	10.199	2.18891031607026e-07	5.86328401950488e-06	7.01049	NOD2_GMTP-WT_GMTP
ENSMUSG00000030189.15	Ybx3	-0.791433	5.45425	-10.1883	2.21477415012465e-07	5.92545031315723e-06	7.02415	NOD2_GMTP-WT_GMTP
ENSMUSG00000097328.7	Tnfsf12	0.809022	5.26208	10.187	2.21788334636286e-07	5.92666240807119e-06	7.03376	NOD2_GMTP-WT_GMTP
ENSMUSG00000002343.11	Armc6	1.4093	2.2635	10.1853	2.22201683297509e-07	5.93060545384847e-06	7.38967	NOD2_GMTP-WT_GMTP
ENSMUSG00000030314.16	Atg7	0.495208	6.53149	10.1738	2.25025912241276e-07	5.99813117901245e-06	6.96224	NOD2_GMTP-WT_GMTP
ENSMUSG00000032754.14	Slc8b1	0.695879	7.09671	10.1728	2.25269301663265e-07	5.99813117901245e-06	6.94524	NOD2_GMTP-WT_GMTP
ENSMUSG00000070923.4	Klhl9	0.535228	6.50577	10.1696	2.26056631548617e-07	6.01192088169761e-06	6.95825	NOD2_GMTP-WT_GMTP
ENSMUSG00000022246.14	Rai14	0.789098	4.50244	10.1629	2.27728818154756e-07	6.04918228510366e-06	7.06507	NOD2_GMTP-WT_GMTP
ENSMUSG00000026389.16	Steap3	0.537636	6.93611	10.1595	2.2857395947186e-07	6.06441231592819e-06	6.93389	NOD2_GMTP-WT_GMTP
ENSMUSG00000023249.15	Parp3	-0.745929	3.98011	-10.1502	2.30918968317539e-07	6.11935266041477e-06	7.10799	NOD2_GMTP-WT_GMTP
ENSMUSG00000032890.17	Rims3	1.16517	1.89395	10.136	2.3455065784745e-07	6.20821925094916e-06	7.37918	NOD2_GMTP-WT_GMTP
ENSMUSG00000026764.15	Kif5c	0.89924	3.7233	10.1347	2.34893055423671e-07	6.20991557543646e-06	7.1231	NOD2_GMTP-WT_GMTP
ENSMUSG00000062901.3	Klhl24	0.762308	7.51145	10.131	2.35848505861454e-07	6.22779610803149e-06	6.88723	NOD2_GMTP-WT_GMTP
ENSMUSG00000036862.15	Dchs1	1.23612	2.70576	10.1266	2.36981042547407e-07	6.25030496732894e-06	7.26172	NOD2_GMTP-WT_GMTP
ENSMUSG00000031101.6	Sash3	0.472426	7.00342	10.1204	2.38624493663156e-07	6.27896070543432e-06	6.88651	NOD2_GMTP-WT_GMTP
ENSMUSG00000017057.9	Il13ra1	-0.879866	4.44934	-10.1203	2.38630335598454e-07	6.27896070543432e-06	7.02096	NOD2_GMTP-WT_GMTP
ENSMUSG00000040328.16	Olfr56	-1.83517	0.906245	-10.1191	2.3895004351318e-07	6.27996739800894e-06	7.44905	NOD2_GMTP-WT_GMTP
ENSMUSG00000037331.15	Larp1	-0.508733	7.30683	-10.1164	2.39675141224673e-07	6.29035963635712e-06	6.87456	NOD2_GMTP-WT_GMTP
ENSMUSG00000026819.15	Slc25a25	-0.555263	4.28772	-10.1155	2.39909292813154e-07	6.29035963635712e-06	7.03209	NOD2_GMTP-WT_GMTP
ENSMUSG00000086291.1	Gm15513	1.01649	2.79483	10.1126	2.40671366170991e-07	6.30293449926446e-06	7.23264	NOD2_GMTP-WT_GMTP
ENSMUSG00000017493.12	Igfbp4	0.75318	6.49635	10.1097	2.41447458031329e-07	6.31584657802232e-06	6.88878	NOD2_GMTP-WT_GMTP
ENSMUSG00000030711.16	Sult1a1	1.53872	1.97896	10.104	2.42963319879652e-07	6.34805685769867e-06	7.33288	NOD2_GMTP-WT_GMTP
ENSMUSG00000037568.12	Vash2	0.998199	2.62283	10.0963	2.45028014104348e-07	6.39393960464439e-06	7.23875	NOD2_GMTP-WT_GMTP
ENSMUSG00000023087.15	Noct	-1.25059	2.75198	-10.0947	2.45461148741868e-07	6.39393960464439e-06	7.21839	NOD2_GMTP-WT_GMTP
ENSMUSG00000024966.9	Stip1	-0.501557	6.40444	-10.0943	2.45579090269361e-07	6.39393960464439e-06	6.87387	NOD2_GMTP-WT_GMTP
ENSMUSG00000024900.5	Cpt1a	0.496983	7.49578	10.0887	2.47113693449172e-07	6.42639608616711e-06	6.83808	NOD2_GMTP-WT_GMTP
ENSMUSG00000035919.16	Bbs9	0.648508	3.59429	10.0862	2.47795071108008e-07	6.43661399491617e-06	7.08481	NOD2_GMTP-WT_GMTP
ENSMUSG00000060568.14	Fam78b	1.47477	1.98697	10.0841	2.48352244457403e-07	6.44358561695121e-06	7.30931	NOD2_GMTP-WT_GMTP
ENSMUSG00000049624.14	Slc17a5	0.46094	6.44715	10.0827	2.48748231280704e-07	6.44636386128495e-06	6.85886	NOD2_GMTP-WT_GMTP
ENSMUSG00000095562.8	Erdr1	-2.70521	0.955766	-10.0771	2.50299658473202e-07	6.47904440778719e-06	7.39912	NOD2_GMTP-WT_GMTP
ENSMUSG00000035621.13	Midn	-0.548806	5.91177	-10.0759	2.50633611448498e-07	6.48017123088104e-06	6.87105	NOD2_GMTP-WT_GMTP
ENSMUSG00000070427.4	Il18bp	0.716447	5.72548	10.0746	2.50992996815217e-07	6.48195224298372e-06	6.87798	NOD2_GMTP-WT_GMTP
ENSMUSG00000102918.1	Pcdhgc3	-2.04063	-0.151612	-10.0704	2.52156227914653e-07	6.50446463983776e-06	7.41967	NOD2_GMTP-WT_GMTP
ENSMUSG00000014361.5	Mertk	0.737114	7.2752	10.0616	2.54626458110759e-07	6.56060064644961e-06	6.81113	NOD2_GMTP-WT_GMTP
ENSMUSG00000073678.4	Pgap1	1.0161	7.92844	10.0486	2.58313699584222e-07	6.64792800325577e-06	6.7831	NOD2_GMTP-WT_GMTP
ENSMUSG00000053398.11	Phgdh	-2.24443	1.06811	-10.0461	2.59029138780565e-07	6.65866033826124e-06	7.35658	NOD2_GMTP-WT_GMTP
ENSMUSG00000026202.13	Tuba4a	-0.836025	4.32113	-10.0445	2.59480578090711e-07	6.6625893428516e-06	6.94566	NOD2_GMTP-WT_GMTP
ENSMUSG00000031429.14	Psmd10	-0.635312	5.44056	-10.0329	2.62824353910406e-07	6.74068943540561e-06	6.8438	NOD2_GMTP-WT_GMTP
ENSMUSG00000019872.13	Smpdl3a	0.423479	9.05063	10.0213	2.66242395895678e-07	6.82051272057435e-06	6.73806	NOD2_GMTP-WT_GMTP
ENSMUSG00000004891.16	Nes	0.828931	3.73906	10.0094	2.69777485737915e-07	6.90314798081433e-06	6.97542	NOD2_GMTP-WT_GMTP
ENSMUSG00000032238.17	Rora	0.828575	4.76745	10.0066	2.70629406519724e-07	6.9170148312424e-06	6.85871	NOD2_GMTP-WT_GMTP
ENSMUSG00000032477.14	Cdc25a	-0.64536	3.8929	-9.99903	2.72910740453008e-07	6.96734250769791e-06	6.94294	NOD2_GMTP-WT_GMTP
ENSMUSG00000027215.13	Cd82	-0.714813	6.39491	-9.99344	2.74612533367798e-07	7.0027765223265e-06	6.75581	NOD2_GMTP-WT_GMTP
ENSMUSG00000060519.11	Tor3a	-0.625454	8.11802	-9.98826	2.76201137337556e-07	7.03524654955808e-06	6.70915	NOD2_GMTP-WT_GMTP
ENSMUSG00000029672.16	Fam3c	0.456862	6.453	9.9775	2.7952911541663e-07	7.11189641082244e-06	6.73506	NOD2_GMTP-WT_GMTP
ENSMUSG00000011256.16	Adam19	1.1439	3.40944	9.96097	2.84726011641782e-07	7.23586730952514e-06	6.96539	NOD2_GMTP-WT_GMTP
ENSMUSG00000023055.10	Calcoco1	0.556517	6.09934	9.94325	2.90414186281385e-07	7.37202700625319e-06	6.70729	NOD2_GMTP-WT_GMTP
ENSMUSG00000054676.15	1600014C10Rik	-0.73394	5.22452	-9.9384	2.91991274712718e-07	7.403637855301e-06	6.74513	NOD2_GMTP-WT_GMTP
ENSMUSG00000040204.6	Pclaf	-1.0043	3.44921	-9.93622	2.92704540216661e-07	7.41329898507874e-06	6.93041	NOD2_GMTP-WT_GMTP
ENSMUSG00000023349.14	Clec4n	-0.709244	3.66151	-9.92988	2.94784849251051e-07	7.45752192895545e-06	6.89284	NOD2_GMTP-WT_GMTP
ENSMUSG00000054342.8	Kcnn4	-0.655525	7.26997	-9.91282	3.0046456849205e-07	7.59260013223456e-06	6.63576	NOD2_GMTP-WT_GMTP
ENSMUSG00000086564.9	Cd101	0.814699	2.32264	9.89888	3.05193373527852e-07	7.69550613772448e-06	7.05294	NOD2_GMTP-WT_GMTP
ENSMUSG00000024242.15	Map4k3	-0.66443	6.94108	-9.89879	3.05226680943224e-07	7.69550613772448e-06	6.62724	NOD2_GMTP-WT_GMTP
ENSMUSG00000019564.12	Arid3a	0.605525	5.78201	9.8922	3.07489391567249e-07	7.73850948567622e-06	6.66044	NOD2_GMTP-WT_GMTP
ENSMUSG00000033885.15	Pxk	-0.540177	5.55596	-9.8918	3.07625954098275e-07	7.73850948567622e-06	6.67112	NOD2_GMTP-WT_GMTP
ENSMUSG00000034265.8	Zdhhc14	0.647915	5.65312	9.88306	3.1065757003349e-07	7.80597112630323e-06	6.65565	NOD2_GMTP-WT_GMTP
ENSMUSG00000020057.2	Dram1	-0.703867	6.65566	-9.86883	3.15661149340767e-07	7.92277528148543e-06	6.5998	NOD2_GMTP-WT_GMTP
ENSMUSG00000030327.8	Necap1	-0.481408	6.02713	-9.86621	3.16590282571099e-07	7.93221212057658e-06	6.61888	NOD2_GMTP-WT_GMTP
ENSMUSG00000018819.10	Lsp1	0.632693	5.27041	9.86577	3.16748128868092e-07	7.93221212057658e-06	6.65626	NOD2_GMTP-WT_GMTP
ENSMUSG00000037172.14	Dennd11	0.693015	3.73975	9.86103	3.18441299002088e-07	7.96567343568788e-06	6.80085	NOD2_GMTP-WT_GMTP
ENSMUSG00000040562.12	Gstm2	1.09531	2.27955	9.8582	3.19454408480438e-07	7.98206743160584e-06	7.01146	NOD2_GMTP-WT_GMTP
ENSMUSG00000058756.13	Thra	0.73516	3.80784	9.85573	3.20342360217021e-07	7.99530098828008e-06	6.78559	NOD2_GMTP-WT_GMTP
ENSMUSG00000071042.12	Rasgrp3	0.705149	4.94685	9.85001	3.22410448415162e-07	8.03792663182963e-06	6.65969	NOD2_GMTP-WT_GMTP
ENSMUSG00000090213.1	Tmem189	0.539097	7.45926	9.8476	3.2328930109211e-07	8.05084171346904e-06	6.55394	NOD2_GMTP-WT_GMTP
ENSMUSG00000029372.7	Ppbp	4.93585	-1.07433	9.83704	3.27154501385148e-07	8.13801381204772e-06	7.10657	NOD2_GMTP-WT_GMTP
ENSMUSG00000045312.12	Lhfpl2	0.555713	8.84449	9.83495	3.27925195391682e-07	8.14810120798954e-06	6.51867	NOD2_GMTP-WT_GMTP
ENSMUSG00000099397.1	Gm7809	3.31412	-0.669052	9.83206	3.28996207755144e-07	8.16562000404952e-06	7.13961	NOD2_GMTP-WT_GMTP
ENSMUSG00000000876.11	Pxmp4	0.570448	4.30235	9.82274	3.32468124404847e-07	8.2426236220504e-06	6.68623	NOD2_GMTP-WT_GMTP
ENSMUSG00000027533.10	Fabp5	0.491278	10.4537	9.81981	3.33569114707027e-07	8.26074101715638e-06	6.49494	NOD2_GMTP-WT_GMTP
ENSMUSG00000041859.10	Mcm3	-0.684636	5.17207	-9.81791	3.34284624059668e-07	8.26928250182193e-06	6.60558	NOD2_GMTP-WT_GMTP
ENSMUSG00000029998.14	Pcyox1	0.472027	8.11666	9.81268	3.36263292773489e-07	8.30901755443506e-06	6.5005	NOD2_GMTP-WT_GMTP
ENSMUSG00000043391.10	2510009E07Rik	0.747234	6.14723	9.80907	3.37638230894599e-07	8.33376310392831e-06	6.54589	NOD2_GMTP-WT_GMTP
ENSMUSG00000106019.1	Gm43672	1.42231	1.46026	9.80639	3.3866218734067e-07	8.34980042666561e-06	7.04921	NOD2_GMTP-WT_GMTP
ENSMUSG00000026158.11	Ogfrl1	-0.554332	5.37195	-9.80451	3.39378865785098e-07	8.35823469344689e-06	6.5773	NOD2_GMTP-WT_GMTP
ENSMUSG00000020075.8	Ddx21	-0.559212	6.57556	-9.79705	3.42253196381983e-07	8.41569192209624e-06	6.51654	NOD2_GMTP-WT_GMTP
ENSMUSG00000024277.14	Mapre2	0.506816	7.35183	9.7965	3.42466197519983e-07	8.41569192209624e-06	6.49518	NOD2_GMTP-WT_GMTP
ENSMUSG00000063873.10	Slc24a3	-1.71605	1.16473	-9.79465	3.43181140320626e-07	8.42398326069762e-06	7.06347	NOD2_GMTP-WT_GMTP
ENSMUSG00000071637.5	Cebpd	-1.68628	3.38328	-9.78586	3.46610769451699e-07	8.49808001298797e-06	6.76286	NOD2_GMTP-WT_GMTP
ENSMUSG00000027330.16	Cdc25b	0.64209	4.83881	9.78496	3.46961452598576e-07	8.49808001298797e-06	6.59034	NOD2_GMTP-WT_GMTP
ENSMUSG00000032489.17	Kif9	0.945927	2.51443	9.78259	3.47893285720819e-07	8.51156018014105e-06	6.88981	NOD2_GMTP-WT_GMTP
ENSMUSG00000031805.17	Jak3	-0.655671	5.00757	-9.77449	3.51098534828926e-07	8.57279434479464e-06	6.56492	NOD2_GMTP-WT_GMTP
ENSMUSG00000030852.18	Tacc2	0.885819	3.29231	9.77311	3.51648183930176e-07	8.57279434479464e-06	6.76122	NOD2_GMTP-WT_GMTP
ENSMUSG00000031274.16	Col4a5	-1.20251	2.38206	-9.77123	3.52395806672316e-07	8.57279434479464e-06	6.89538	NOD2_GMTP-WT_GMTP
ENSMUSG00000037321.17	Tap1	-0.595928	7.58643	-9.77097	3.52500631744692e-07	8.57279434479464e-06	6.45961	NOD2_GMTP-WT_GMTP
ENSMUSG00000036880.10	Acaa2	0.563246	5.55423	9.77016	3.52823864583029e-07	8.57279434479464e-06	6.52611	NOD2_GMTP-WT_GMTP
ENSMUSG00000054626.11	Xlr	-1.66116	0.961992	-9.76951	3.53085109773539e-07	8.57279434479464e-06	7.05102	NOD2_GMTP-WT_GMTP
ENSMUSG00000024393.14	Prrc2a	-0.546874	8.16886	-9.7695	3.53085555634217e-07	8.57279434479464e-06	6.44798	NOD2_GMTP-WT_GMTP
ENSMUSG00000057596.13	Trim30d	-0.706911	6.40022	-9.76492	3.54925210951202e-07	8.60809373038497e-06	6.48382	NOD2_GMTP-WT_GMTP
ENSMUSG00000040537.17	Adam22	1.32861	1.38546	9.75945	3.57128649384814e-07	8.65212980860298e-06	7.00242	NOD2_GMTP-WT_GMTP
ENSMUSG00000079316.10	Rab9	0.484107	6.25569	9.75127	3.6045658720876e-07	8.72328398089921e-06	6.47256	NOD2_GMTP-WT_GMTP
ENSMUSG00000054364.5	Rhob	0.509683	7.56123	9.74509	3.62993488336926e-07	8.77516111079288e-06	6.42903	NOD2_GMTP-WT_GMTP
ENSMUSG00000024043.13	Arhgap28	1.83866	0.580733	9.72885	3.69751962542187e-07	8.92886963225521e-06	7.02911	NOD2_GMTP-WT_GMTP
ENSMUSG00000037474.13	Dtl	-1.18308	2.11623	-9.72506	3.71345865419822e-07	8.95766518390539e-06	6.87743	NOD2_GMTP-WT_GMTP
ENSMUSG00000028461.12	Ccdc107	-1.0384	3.77347	-9.72148	3.72858990297734e-07	8.98445210638588e-06	6.63037	NOD2_GMTP-WT_GMTP
ENSMUSG00000063410.8	Stk24	0.474429	7.13362	9.71446	3.7584792887066e-07	9.04670424691589e-06	6.4017	NOD2_GMTP-WT_GMTP
ENSMUSG00000021054.6	Sgpp1	0.498137	7.12246	9.70314	3.80721117485666e-07	9.15104358499715e-06	6.38833	NOD2_GMTP-WT_GMTP
ENSMUSG00000028007.13	Snx7	0.625063	4.88861	9.70249	3.81002979897923e-07	9.15104358499715e-06	6.4876	NOD2_GMTP-WT_GMTP
ENSMUSG00000018474.18	Chd3	0.602748	7.82136	9.69077	3.8612463682683e-07	9.26408496937318e-06	6.3586	NOD2_GMTP-WT_GMTP
ENSMUSG00000034854.8	Mfsd12	0.528717	9.0794	9.6872	3.87702204507972e-07	9.29194338258473e-06	6.33918	NOD2_GMTP-WT_GMTP
ENSMUSG00000018931.3	Natd1	0.564044	5.40011	9.68258	3.89748458898519e-07	9.33096283626895e-06	6.42919	NOD2_GMTP-WT_GMTP
ENSMUSG00000046997.5	Spsb4	0.952354	3.06657	9.68157	3.90197114463967e-07	9.3316915488044e-06	6.68668	NOD2_GMTP-WT_GMTP
ENSMUSG00000021636.15	Marveld2	1.52971	0.548809	9.67945	3.91142656765745e-07	9.34428918673883e-06	6.97443	NOD2_GMTP-WT_GMTP
ENSMUSG00000066595.9	Flvcr1	0.544629	6.71513	9.67537	3.92967221838232e-07	9.37783702767538e-06	6.36583	NOD2_GMTP-WT_GMTP
ENSMUSG00000027195.10	Hsd17b12	-0.504705	6.70448	-9.67241	3.94297842622985e-07	9.39953820774215e-06	6.36257	NOD2_GMTP-WT_GMTP
ENSMUSG00000002602.16	Axl	-0.540552	7.60017	-9.66883	3.95909488211765e-07	9.42788517659457e-06	6.33619	NOD2_GMTP-WT_GMTP
ENSMUSG00000002103.16	Acp2	-0.444355	8.4589	-9.66733	3.96591217481286e-07	9.43405099750526e-06	6.32094	NOD2_GMTP-WT_GMTP
ENSMUSG00000004609.11	Cd33	-1.14388	3.3702	-9.66351	3.98326259352286e-07	9.46069726784226e-06	6.61884	NOD2_GMTP-WT_GMTP
ENSMUSG00000047842.7	Diras2	2.1827	0.49423	9.66299	3.98559379365022e-07	9.46069726784226e-06	6.95836	NOD2_GMTP-WT_GMTP
ENSMUSG00000026853.15	Crat	0.520936	6.47844	9.65236	4.03430463922729e-07	9.56614659033777e-06	6.34545	NOD2_GMTP-WT_GMTP
ENSMUSG00000044350.14	Lacc1	-0.41102	7.11841	-9.64982	4.04605465703754e-07	9.58382352043297e-06	6.32393	NOD2_GMTP-WT_GMTP
ENSMUSG00000015112.15	Slc25a13	0.482958	5.14057	9.64888	4.05039450539287e-07	9.58392922575091e-06	6.40464	NOD2_GMTP-WT_GMTP
ENSMUSG00000060216.15	Arrb2	-0.648384	7.77867	-9.64026	4.09056016683823e-07	9.6590075174095e-06	6.29821	NOD2_GMTP-WT_GMTP
ENSMUSG00000087263.1	Gm15726	-5.27519	0.0331884	-9.63951	4.09405809176195e-07	9.6590075174095e-06	6.94613	NOD2_GMTP-WT_GMTP
ENSMUSG00000023942.15	Slc29a1	0.620118	5.90025	9.6391	4.09597622943547e-07	9.6590075174095e-06	6.35138	NOD2_GMTP-WT_GMTP
ENSMUSG00000020102.15	Slc16a7	0.849911	5.8614	9.63836	4.09943984179035e-07	9.6590075174095e-06	6.35223	NOD2_GMTP-WT_GMTP
ENSMUSG00000053137.7	Mapk11	-3.1204	-0.66847	-9.63592	4.11091416303823e-07	9.67582570884727e-06	6.92693	NOD2_GMTP-WT_GMTP
ENSMUSG00000020900.15	Myh10	1.4927	1.62824	9.632	4.12943165635662e-07	9.70916844555165e-06	6.8279	NOD2_GMTP-WT_GMTP
ENSMUSG00000038910.7	Plcl2	0.449494	6.23801	9.62287	4.17282249855094e-07	9.80086193791232e-06	6.31814	NOD2_GMTP-WT_GMTP
ENSMUSG00000078439.9	Smim24	0.807314	3.41726	9.61684	4.20176541410046e-07	9.85846389956083e-06	6.55563	NOD2_GMTP-WT_GMTP
ENSMUSG00000087362.7	Gm13710	0.966711	2.66167	9.61588	4.20641557872048e-07	9.85900743781409e-06	6.67012	NOD2_GMTP-WT_GMTP
ENSMUSG00000028152.10	Tspan5	0.701241	4.84642	9.61088	4.23060987023982e-07	9.90530934256675e-06	6.38013	NOD2_GMTP-WT_GMTP
ENSMUSG00000031447.7	Lamp1	0.488802	10.835	9.60959	4.23687279181567e-07	9.90957469641333e-06	6.24203	NOD2_GMTP-WT_GMTP
ENSMUSG00000026797.16	Stxbp1	-0.722688	5.36549	-9.60392	4.26453540499795e-07	9.96383020855698e-06	6.33599	NOD2_GMTP-WT_GMTP
ENSMUSG00000028031.6	Dkk2	2.61257	2.03967	9.59828	4.29222258714569e-07	1.00180295593077e-05	6.73768	NOD2_GMTP-WT_GMTP
ENSMUSG00000028212.16	Ccne2	-1.48519	1.70723	-9.59203	4.32315998678573e-07	1.00796937079572e-05	6.77165	NOD2_GMTP-WT_GMTP
ENSMUSG00000022186.14	Oxct1	0.420312	8.1493	9.58926	4.33694434075864e-07	1.00999454156451e-05	6.23018	NOD2_GMTP-WT_GMTP
ENSMUSG00000072596.4	Ear2	1.21012	1.64453	9.58846	4.34089887222858e-07	1.00999454156451e-05	6.77474	NOD2_GMTP-WT_GMTP
ENSMUSG00000039958.17	Etfbkmt	1.11325	1.57017	9.57843	4.39128151641397e-07	1.02015973430806e-05	6.77127	NOD2_GMTP-WT_GMTP
ENSMUSG00000024613.16	Tcof1	-0.572011	6.00167	-9.57794	4.39373237426633e-07	1.02015973430806e-05	6.27282	NOD2_GMTP-WT_GMTP
ENSMUSG00000041957.15	Pkp2	1.39318	1.87966	9.56786	4.44501782099494e-07	1.03099462203597e-05	6.72209	NOD2_GMTP-WT_GMTP
ENSMUSG00000022237.17	Ankrd33b	0.902997	3.60934	9.56226	4.47373636171788e-07	1.03657818732099e-05	6.4616	NOD2_GMTP-WT_GMTP
ENSMUSG00000075232.6	Amd1	-0.594172	5.4019	-9.5556	4.50818573793298e-07	1.0434766428475e-05	6.27503	NOD2_GMTP-WT_GMTP
ENSMUSG00000034783.7	Cd207	-4.66769	-2.45305	-9.55288	4.52237640055939e-07	1.04529686979805e-05	6.52861	NOD2_GMTP-WT_GMTP
ENSMUSG00000013629.16	Cad	-0.705414	4.23237	-9.55145	4.52983079090099e-07	1.04529686979805e-05	6.36771	NOD2_GMTP-WT_GMTP
ENSMUSG00000042647.13	Acad12	0.752502	4.57302	9.5514	4.53010385467983e-07	1.04529686979805e-05	6.3317	NOD2_GMTP-WT_GMTP
ENSMUSG00000034724.18	Cnot6l	0.700526	6.87527	9.54887	4.54331417008412e-07	1.04726207724263e-05	6.20746	NOD2_GMTP-WT_GMTP
ENSMUSG00000021395.11	Spin1	0.423133	6.05718	9.54749	4.55055158986412e-07	1.04784785990339e-05	6.23334	NOD2_GMTP-WT_GMTP
ENSMUSG00000031781.14	Ciapin1	0.771506	4.34533	9.54418	4.56796663227248e-07	1.05077360274119e-05	6.34608	NOD2_GMTP-WT_GMTP
ENSMUSG00000070737.10	Tmem35b	0.705303	4.64217	9.54283	4.57509431893845e-07	1.05132934643124e-05	6.31502	NOD2_GMTP-WT_GMTP
ENSMUSG00000031662.8	Snx20	-0.69202	6.24053	-9.53731	4.60428235479095e-07	1.05694806772068e-05	6.2138	NOD2_GMTP-WT_GMTP
ENSMUSG00000036752.4	Tubb4b	-0.642731	5.89619	-9.53627	4.60983785943593e-07	1.05713578784783e-05	6.22639	NOD2_GMTP-WT_GMTP
ENSMUSG00000046079.16	Lrrc8d	0.603074	6.1436	9.53417	4.62103113622188e-07	1.05861465854742e-05	6.21361	NOD2_GMTP-WT_GMTP
ENSMUSG00000030830.18	Itgal	-0.678371	7.72256	-9.53112	4.63729926256984e-07	1.06125188149457e-05	6.16622	NOD2_GMTP-WT_GMTP
ENSMUSG00000027087.11	Itgav	-0.941594	7.29021	-9.52527	4.66878880452441e-07	1.0673635716737e-05	6.16805	NOD2_GMTP-WT_GMTP
ENSMUSG00000037364.12	Srrt	-0.502843	6.33972	-9.51705	4.71331248572032e-07	1.07643952399056e-05	6.18533	NOD2_GMTP-WT_GMTP
ENSMUSG00000117444.1	Gm50020	1.91748	-0.0265803	9.51298	4.73553827488317e-07	1.08040966797002e-05	6.8035	NOD2_GMTP-WT_GMTP
ENSMUSG00000038437.11	Mllt6	-0.426999	6.69513	-9.5076	4.76508500116832e-07	1.08604026180867e-05	6.16216	NOD2_GMTP-WT_GMTP
ENSMUSG00000028525.16	Pde4b	-0.824223	3.72347	-9.50521	4.77832519591771e-07	1.08794663363788e-05	6.37592	NOD2_GMTP-WT_GMTP
ENSMUSG00000027244.14	Atg13	0.456704	6.55511	9.50221	4.79489829566217e-07	1.09060719338542e-05	6.15988	NOD2_GMTP-WT_GMTP
ENSMUSG00000026712.3	Mrc1	0.82573	7.73984	9.49715	4.82309959495633e-07	1.09590449350571e-05	6.12424	NOD2_GMTP-WT_GMTP
ENSMUSG00000068957.1	4930589L23Rik	0.913342	2.46613	9.49537	4.83304265747865e-07	1.09704660036949e-05	6.55481	NOD2_GMTP-WT_GMTP
ENSMUSG00000022724.15	Riox2	-0.536696	4.46342	-9.49419	4.83962897009845e-07	1.09742521554682e-05	6.27299	NOD2_GMTP-WT_GMTP
ENSMUSG00000042719.17	Naa25	-0.604039	5.21113	-9.4855	4.88860082044538e-07	1.10740456961013e-05	6.2008	NOD2_GMTP-WT_GMTP
ENSMUSG00000039159.16	Ube2h	0.496733	6.27757	9.48397	4.89729537077617e-07	1.10824900211084e-05	6.14704	NOD2_GMTP-WT_GMTP
ENSMUSG00000084918.1	Gm12708	1.71146	0.323386	9.4789	4.92617970013513e-07	1.1136560045503e-05	6.7546	NOD2_GMTP-WT_GMTP
ENSMUSG00000039725.6	Trp53rka	-0.741084	4.13395	-9.47066	4.97347081481802e-07	1.12320905152869e-05	6.28034	NOD2_GMTP-WT_GMTP
ENSMUSG00000064065.15	Ipcef1	1.34648	1.98703	9.46622	4.99918314884735e-07	1.12787435389516e-05	6.58688	NOD2_GMTP-WT_GMTP
ENSMUSG00000024981.6	Acsl5	-0.448928	6.97017	-9.46434	5.01011745507153e-07	1.12919950277789e-05	6.10115	NOD2_GMTP-WT_GMTP
ENSMUSG00000031453.16	Rasa3	0.452889	7.77551	9.45673	5.05459005250461e-07	1.13807333846151e-05	6.07387	NOD2_GMTP-WT_GMTP
ENSMUSG00000089942.9	Pira2	0.575948	5.93226	9.45278	5.07784462115676e-07	1.1421567241116e-05	6.12247	NOD2_GMTP-WT_GMTP
ENSMUSG00000074361.11	C5ar2	1.11441	2.74676	9.44947	5.09739516318534e-07	1.14539957982029e-05	6.45673	NOD2_GMTP-WT_GMTP
ENSMUSG00000029082.17	Bst1	0.679629	3.02758	9.44691	5.11258975865749e-07	1.14765810145799e-05	6.40982	NOD2_GMTP-WT_GMTP
ENSMUSG00000066894.14	Vsig10	1.08902	2.84311	9.44591	5.1185259882873e-07	1.14783588318246e-05	6.43736	NOD2_GMTP-WT_GMTP
ENSMUSG00000035783.9	Acta2	-0.999208	1.93333	-9.4353	5.18211625834325e-07	1.16092931799611e-05	6.55678	NOD2_GMTP-WT_GMTP
ENSMUSG00000046318.16	Ccbe1	1.31992	1.96477	9.43238	5.19975928775332e-07	1.1637134301669e-05	6.54914	NOD2_GMTP-WT_GMTP
ENSMUSG00000028599.10	Tnfrsf1b	0.425725	9.99318	9.4202	5.27403811259907e-07	1.1781858798685e-05	6.00896	NOD2_GMTP-WT_GMTP
ENSMUSG00000032725.10	Folr2	0.517182	6.08466	9.42004	5.27498630389742e-07	1.1781858798685e-05	6.07571	NOD2_GMTP-WT_GMTP
ENSMUSG00000072620.3	Slfn2	-0.515426	9.05682	-9.41361	5.31466988097285e-07	1.18578973599282e-05	6.00478	NOD2_GMTP-WT_GMTP
ENSMUSG00000063253.11	Scoc	-0.897339	3.76958	-9.41257	5.3211362672352e-07	1.18578973599282e-05	6.25646	NOD2_GMTP-WT_GMTP
ENSMUSG00000049037.8	Clec4a1	-0.539539	7.37627	-9.41195	5.32497340323939e-07	1.18578973599282e-05	6.02664	NOD2_GMTP-WT_GMTP
ENSMUSG00000021756.12	Il6st	0.84421	8.19606	9.39696	5.41892743866083e-07	1.205508753129e-05	5.9933	NOD2_GMTP-WT_GMTP
ENSMUSG00000022586.11	Ly6i	-2.98338	0.704965	-9.39312	5.44327358528296e-07	1.20971876004401e-05	6.63258	NOD2_GMTP-WT_GMTP
ENSMUSG00000031861.16	Lpar2	-3.09451	-1.01103	-9.39188	5.45114745506688e-07	1.21026321557122e-05	6.63397	NOD2_GMTP-WT_GMTP
ENSMUSG00000019843.14	Fyn	-0.500659	5.38621	-9.38395	5.50188022054796e-07	1.22023588577035e-05	6.06515	NOD2_GMTP-WT_GMTP
ENSMUSG00000052821.3	Cysltr1	-0.563452	4.80615	-9.38316	5.50700280988993e-07	1.22023588577035e-05	6.10449	NOD2_GMTP-WT_GMTP
ENSMUSG00000047875.6	Gpr157	0.566276	5.21861	9.37991	5.52791862225049e-07	1.22365524026067e-05	6.07025	NOD2_GMTP-WT_GMTP
ENSMUSG00000031530.6	Dusp4	-1.03389	4.61868	-9.37272	5.57458864616832e-07	1.2327630967488e-05	6.10833	NOD2_GMTP-WT_GMTP
ENSMUSG00000022295.8	Atp6v1c1	0.454182	8.33035	9.36587	5.61949657792605e-07	1.24146363508182e-05	5.95292	NOD2_GMTP-WT_GMTP
ENSMUSG00000095028.6	Sirpb1b	0.661817	4.19154	9.36393	5.63228329599942e-07	1.2430577367323e-05	6.14247	NOD2_GMTP-WT_GMTP
ENSMUSG00000015542.17	Nat9	0.711117	4.65453	9.36292	5.63891363087781e-07	1.24329130282388e-05	6.09299	NOD2_GMTP-WT_GMTP
ENSMUSG00000019088.14	Dnase1l1	0.46929	7.89874	9.35852	5.66805021441513e-07	1.24837602095391e-05	5.95024	NOD2_GMTP-WT_GMTP
ENSMUSG00000030589.15	Rasgrp4	-1.10651	2.43865	-9.35775	5.67316490497588e-07	1.24837602095391e-05	6.39206	NOD2_GMTP-WT_GMTP
ENSMUSG00000027291.15	Vps39	0.505946	6.82386	9.35571	5.68674176982974e-07	1.25013073014986e-05	5.97097	NOD2_GMTP-WT_GMTP
ENSMUSG00000023913.17	Pla2g7	0.508372	8.34642	9.35235	5.70915541054473e-07	1.25382268381383e-05	5.93593	NOD2_GMTP-WT_GMTP
ENSMUSG00000024013.15	Fgd2	-0.703783	5.95368	-9.34704	5.74477341927723e-07	1.2602276989538e-05	5.99087	NOD2_GMTP-WT_GMTP
ENSMUSG00000022818.13	Cyp2ab1	4.60847	-0.610579	9.34632	5.74961590792349e-07	1.2602276989538e-05	6.60755	NOD2_GMTP-WT_GMTP
ENSMUSG00000011148.14	Adssl1	0.623469	5.97552	9.33029	5.85878453675915e-07	1.28289557771057e-05	5.96914	NOD2_GMTP-WT_GMTP
ENSMUSG00000076613.4	Ighg2b	5.70557	-6.04719	9.32589	5.88910263882411e-07	1.28827007039297e-05	4.73021	NOD2_GMTP-WT_GMTP
ENSMUSG00000031960.14	Aars	-0.647613	6.59367	-9.32386	5.90321166228523e-07	1.29009169265985e-05	5.93833	NOD2_GMTP-WT_GMTP
ENSMUSG00000052298.12	Cdc42se2	0.396312	8.14555	9.31368	5.97420026314884e-07	1.30432808680666e-05	5.89057	NOD2_GMTP-WT_GMTP
ENSMUSG00000079197.10	Psme2	-0.695927	7.49847	-9.31274	5.98084635073448e-07	1.30450268449598e-05	5.90088	NOD2_GMTP-WT_GMTP
ENSMUSG00000027435.8	Cd93	0.823135	9.53906	9.28874	6.15215853926738e-07	1.34055774889329e-05	5.84681	NOD2_GMTP-WT_GMTP
ENSMUSG00000035064.17	Eef2k	0.762518	4.25172	9.28624	6.17029077486387e-07	1.34257691129958e-05	6.03937	NOD2_GMTP-WT_GMTP
ENSMUSG00000021950.15	Anxa8	-4.66083	-6.13561	-9.2858	6.17345901937603e-07	1.34257691129958e-05	4.6623	NOD2_GMTP-WT_GMTP
ENSMUSG00000026558.13	Uck2	-1.95361	1.32095	-9.26618	6.31794066234264e-07	1.37266027262757e-05	6.42569	NOD2_GMTP-WT_GMTP
ENSMUSG00000033161.10	Atp1a1	-0.399273	9.13949	-9.26397	6.33445509206283e-07	1.37490949872761e-05	5.81798	NOD2_GMTP-WT_GMTP
ENSMUSG00000020250.10	Txnrd1	-0.546926	7.27588	-9.24593	6.47089570090221e-07	1.40315933697017e-05	5.82234	NOD2_GMTP-WT_GMTP
ENSMUSG00000029468.17	P2rx7	0.572112	6.7324	9.24412	6.48471184751788e-07	1.40479005294822e-05	5.83445	NOD2_GMTP-WT_GMTP
ENSMUSG00000025745.12	Hadha	0.39005	7.44691	9.2355	6.55117662847454e-07	1.41781187304707e-05	5.80538	NOD2_GMTP-WT_GMTP
ENSMUSG00000037816.10	Fbxw17	-0.59106	5.40866	-9.22967	6.59651937453204e-07	1.42624163569703e-05	5.87176	NOD2_GMTP-WT_GMTP
ENSMUSG00000040483.15	Xaf1	-0.795786	5.59297	-9.22445	6.63743044303245e-07	1.43369782647999e-05	5.85509	NOD2_GMTP-WT_GMTP
ENSMUSG00000004040.16	Stat3	-0.504044	7.37424	-9.21422	6.71838488262329e-07	1.44978067587982e-05	5.78026	NOD2_GMTP-WT_GMTP
ENSMUSG00000012519.14	Mlkl	-0.68168	5.36801	-9.20224	6.81445905518834e-07	1.46909202800403e-05	5.8398	NOD2_GMTP-WT_GMTP
ENSMUSG00000026809.15	Spaca9	1.55888	1.85381	9.1998	6.83421022038825e-07	1.47192792130814e-05	6.28125	NOD2_GMTP-WT_GMTP
ENSMUSG00000046245.13	Pilra	-0.612721	4.41842	-9.1924	6.89452262653686e-07	1.48348585695195e-05	5.90382	NOD2_GMTP-WT_GMTP
ENSMUSG00000027068.6	Dhrs9	0.954784	5.79813	9.19158	6.90122296542668e-07	1.48349699448522e-05	5.80365	NOD2_GMTP-WT_GMTP
ENSMUSG00000068923.14	Syt11	-0.479113	5.53726	-9.18768	6.93327066911816e-07	1.48895157305133e-05	5.81192	NOD2_GMTP-WT_GMTP
ENSMUSG00000066150.12	Slc31a1	-0.445647	6.80356	-9.18533	6.95263466766574e-07	1.49162643550397e-05	5.75854	NOD2_GMTP-WT_GMTP
ENSMUSG00000030748.9	Il4ra	-0.588217	6.62919	-9.18423	6.96178839525609e-07	1.49162643550397e-05	5.76244	NOD2_GMTP-WT_GMTP
ENSMUSG00000062300.14	Nectin2	-0.826775	3.80557	-9.18374	6.96578114012071e-07	1.49162643550397e-05	5.96791	NOD2_GMTP-WT_GMTP
ENSMUSG00000020823.16	Sec14l1	0.530524	7.51457	9.18066	6.99136107905383e-07	1.49566864579989e-05	5.73503	NOD2_GMTP-WT_GMTP
ENSMUSG00000057897.14	Camk2b	1.14674	1.94376	9.17668	7.02450702713548e-07	1.50132016567504e-05	6.24084	NOD2_GMTP-WT_GMTP
ENSMUSG00000014599.10	Csf1	-0.855375	3.35191	-9.17524	7.03651961829997e-07	1.50244844251796e-05	6.02408	NOD2_GMTP-WT_GMTP
ENSMUSG00000019832.5	Rab32	-0.541713	6.46732	-9.17111	7.07118756238465e-07	1.50840734301615e-05	5.75119	NOD2_GMTP-WT_GMTP
ENSMUSG00000029401.8	Rilpl2	0.665008	7.50357	9.16973	7.08281693568364e-07	1.50944502660849e-05	5.72148	NOD2_GMTP-WT_GMTP
ENSMUSG00000115486.1	Gm49017	5.24838	-5.01778	9.16869	7.09158990142137e-07	1.50987257128259e-05	5.08117	NOD2_GMTP-WT_GMTP
ENSMUSG00000038658.15	Ric1	0.581899	6.30761	9.16508	7.12206110447716e-07	1.51491467515919e-05	5.74913	NOD2_GMTP-WT_GMTP
ENSMUSG00000051497.15	Kcnj16	2.09943	0.808615	9.16199	7.14830130387611e-07	1.51794599730446e-05	6.34907	NOD2_GMTP-WT_GMTP
ENSMUSG00000094562.5	Trav13-4-dv7	1.30719	1.33734	9.16111	7.1557917238345e-07	1.51794599730446e-05	6.2964	NOD2_GMTP-WT_GMTP
ENSMUSG00000023074.11	Mospd1	0.568553	4.31723	9.16101	7.1567211453605e-07	1.51794599730446e-05	5.8753	NOD2_GMTP-WT_GMTP
ENSMUSG00000042606.9	Hirip3	-0.760307	3.27123	-9.15477	7.21008133132806e-07	1.52759860090005e-05	6.01093	NOD2_GMTP-WT_GMTP
ENSMUSG00000038065.13	Mturn	1.01531	2.78655	9.15409	7.21592311813137e-07	1.52759860090005e-05	6.08732	NOD2_GMTP-WT_GMTP
ENSMUSG00000028633.7	Ctps	-1.49538	1.5689	-9.14889	7.26076389300736e-07	1.53563435776941e-05	6.25468	NOD2_GMTP-WT_GMTP
ENSMUSG00000015176.11	Nolc1	-0.597071	4.82169	-9.14527	7.29212461693734e-07	1.54080659637995e-05	5.80643	NOD2_GMTP-WT_GMTP
ENSMUSG00000002881.14	Nab1	-0.560759	6.27887	-9.14308	7.3112091450059e-07	1.54337757476364e-05	5.72246	NOD2_GMTP-WT_GMTP
ENSMUSG00000041762.16	Gpr155	0.687653	5.62329	9.14183	7.32210448322078e-07	1.54421660996319e-05	5.74953	NOD2_GMTP-WT_GMTP
ENSMUSG00000024799.16	Tm7sf2	-0.9819	2.90909	-9.13979	7.33995758626705e-07	1.54652005309138e-05	6.05004	NOD2_GMTP-WT_GMTP
ENSMUSG00000029234.13	Tmem165	0.616362	6.52939	9.12906	7.43448168983831e-07	1.56495839571096e-05	5.69598	NOD2_GMTP-WT_GMTP
ENSMUSG00000033066.16	Gas7	0.478046	8.62242	9.12601	7.46162726492348e-07	1.56830956415105e-05	5.64879	NOD2_GMTP-WT_GMTP
ENSMUSG00000074419.11	Gm15448	1.05665	2.8189	9.12569	7.46445909168834e-07	1.56830956415105e-05	6.04671	NOD2_GMTP-WT_GMTP
ENSMUSG00000115338.2	Pnp	-0.714936	5.73994	-9.1246	7.4741793276994e-07	1.56887453752546e-05	5.72196	NOD2_GMTP-WT_GMTP
ENSMUSG00000027624.20	Epb41l1	0.701647	7.1614	9.12203	7.49714319188582e-07	1.57221575226079e-05	5.66902	NOD2_GMTP-WT_GMTP
ENSMUSG00000100486.7	Gm4131	3.07526	-2.28057	9.11646	7.54721570209481e-07	1.58090624493353e-05	6.13465	NOD2_GMTP-WT_GMTP
ENSMUSG00000021569.10	Trip13	-0.928876	2.19723	-9.11585	7.55275425581116e-07	1.58090624493353e-05	6.13003	NOD2_GMTP-WT_GMTP
ENSMUSG00000030064.16	Frmd4b	0.558774	7.59668	9.10882	7.61648843808643e-07	1.59275263841633e-05	5.64252	NOD2_GMTP-WT_GMTP
ENSMUSG00000026110.15	Mgat4a	-0.6283	5.26404	-9.1041	7.65959138305467e-07	1.60026650309081e-05	5.7223	NOD2_GMTP-WT_GMTP
ENSMUSG00000025017.10	Pik3ap1	-0.464739	10.0351	-9.09058	7.78453935711841e-07	1.62484964149096e-05	5.59593	NOD2_GMTP-WT_GMTP
ENSMUSG00000000982.5	Ccl3	-0.652337	5.67832	-9.08454	7.84105420833921e-07	1.63511628552031e-05	5.67415	NOD2_GMTP-WT_GMTP
ENSMUSG00000042109.8	Csdc2	5.37533	-4.15704	9.07746	7.90779976253394e-07	1.64749520169393e-05	5.3734	NOD2_GMTP-WT_GMTP
ENSMUSG00000001288.15	Rarg	0.651901	4.77771	9.07263	7.95377403321889e-07	1.65552761197027e-05	5.71828	NOD2_GMTP-WT_GMTP
ENSMUSG00000090124.7	Ugt1a7c	0.496804	6.64596	9.07176	7.96205475497776e-07	1.65570668916886e-05	5.61966	NOD2_GMTP-WT_GMTP
ENSMUSG00000026833.18	Olfm1	-0.695401	4.82096	-9.06775	8.00049201174686e-07	1.66215063555035e-05	5.70847	NOD2_GMTP-WT_GMTP
ENSMUSG00000070730.11	Rmdn3	-0.528541	4.57531	-9.06153	8.06038298201906e-07	1.67303558583992e-05	5.72268	NOD2_GMTP-WT_GMTP
ENSMUSG00000022489.6	Pde1b	-0.591755	5.03343	-9.06048	8.07053754773593e-07	1.67358647121405e-05	5.68276	NOD2_GMTP-WT_GMTP
ENSMUSG00000043157.8	Arl11	0.482592	7.41659	9.04823	8.19021177971109e-07	1.69682632721164e-05	5.5693	NOD2_GMTP-WT_GMTP
ENSMUSG00000020641.16	Rsad2	-0.807263	7.8281	-9.04455	8.22647294861262e-07	1.70236251956304e-05	5.55645	NOD2_GMTP-WT_GMTP
ENSMUSG00000028439.14	Fam219a	0.537402	5.5998	9.04397	8.23219270653215e-07	1.70236251956304e-05	5.62677	NOD2_GMTP-WT_GMTP
ENSMUSG00000004071.13	Cdip1	0.468474	5.12738	9.04181	8.2536496586848e-07	1.70521930402068e-05	5.6525	NOD2_GMTP-WT_GMTP
ENSMUSG00000042351.9	Grap2	1.35376	2.24641	9.02754	8.39652387159062e-07	1.73313262855506e-05	6.01284	NOD2_GMTP-WT_GMTP
ENSMUSG00000020358.17	Hnrnpab	-0.48754	7.45242	-9.00759	8.60074827720802e-07	1.77364599176842e-05	5.5167	NOD2_GMTP-WT_GMTP
ENSMUSG00000067591.12	Klra3	1.18803	2.63068	9.00265	8.65219885472851e-07	1.78260861537911e-05	5.92226	NOD2_GMTP-WT_GMTP
ENSMUSG00000042608.15	Stk40	-0.55136	4.67549	-8.99923	8.68791115379635e-07	1.78831514367766e-05	5.63429	NOD2_GMTP-WT_GMTP
ENSMUSG00000020708.12	Psmc5	-0.522263	6.32085	-8.99761	8.70494472936037e-07	1.79016987784533e-05	5.53603	NOD2_GMTP-WT_GMTP
ENSMUSG00000026796.16	Fam129b	0.48994	9.5418	8.9956	8.72608629029302e-07	1.79286522463451e-05	5.47608	NOD2_GMTP-WT_GMTP
ENSMUSG00000043336.14	Filip1l	-0.60126	4.6702	-8.99288	8.75483858895428e-07	1.79711787888994e-05	5.62666	NOD2_GMTP-WT_GMTP
ENSMUSG00000001441.13	Npepps	0.402964	7.03441	8.98127	8.87847187737864e-07	1.82082116727895e-05	5.49304	NOD2_GMTP-WT_GMTP
ENSMUSG00000020826.9	Nos2	-2.72548	1.72786	-8.97762	8.91769697184745e-07	1.82718615732628e-05	6.02287	NOD2_GMTP-WT_GMTP
ENSMUSG00000029730.16	Mcm7	-0.729202	4.517	-8.96333	9.07311645033072e-07	1.85732520510302e-05	5.60364	NOD2_GMTP-WT_GMTP
ENSMUSG00000020876.14	Snx11	-0.506813	4.72923	-8.96013	9.10833137372351e-07	1.86282491239132e-05	5.57943	NOD2_GMTP-WT_GMTP
ENSMUSG00000034993.7	Vat1	0.570804	9.78272	8.95797	9.1322538976435e-07	1.86487809875015e-05	5.42703	NOD2_GMTP-WT_GMTP
ENSMUSG00000032000.17	Birc3	-0.522924	6.28795	-8.9575	9.13744255615612e-07	1.86487809875015e-05	5.4859	NOD2_GMTP-WT_GMTP
ENSMUSG00000022899.9	Slc15a2	1.31602	1.71861	8.95696	9.14344391176744e-07	1.86487809875015e-05	5.99828	NOD2_GMTP-WT_GMTP
ENSMUSG00000024610.15	Cd74	0.630818	11.7586	8.94679	9.25673805764471e-07	1.88626115324408e-05	5.4177	NOD2_GMTP-WT_GMTP
ENSMUSG00000038459.10	Abhd17c	-0.450828	4.90132	-8.93197	9.42462631653076e-07	1.91871977190466e-05	5.52896	NOD2_GMTP-WT_GMTP
ENSMUSG00000002007.5	Srpk3	-3.33639	-1.78104	-8.92886	9.46026201647704e-07	1.92421901890294e-05	6.03063	NOD2_GMTP-WT_GMTP
ENSMUSG00000106825.1	2510016D11Rik	0.772022	3.71527	8.92323	9.52510257572761e-07	1.93564311267951e-05	5.65074	NOD2_GMTP-WT_GMTP
ENSMUSG00000001707.8	Eef1e1	-0.738311	3.85547	-8.9203	9.55903042464869e-07	1.94077020805447e-05	5.62753	NOD2_GMTP-WT_GMTP
ENSMUSG00000005161.15	Prdx2	-0.579732	7.27975	-8.91339	9.63963206601421e-07	1.95535554808159e-05	5.39976	NOD2_GMTP-WT_GMTP
ENSMUSG00000021536.7	Adcy2	1.31045	0.920865	8.90743	9.70980530842751e-07	1.96780096137096e-05	6.02789	NOD2_GMTP-WT_GMTP
ENSMUSG00000092009.1	Myh15	2.63852	-0.645992	8.904	9.75040733116184e-07	1.97423628657182e-05	6.09599	NOD2_GMTP-WT_GMTP
ENSMUSG00000025137.15	Pcyt2	-0.720493	4.94036	-8.90252	9.76788828473663e-07	1.97598269535203e-05	5.48805	NOD2_GMTP-WT_GMTP
ENSMUSG00000091549.1	Gm6548	-0.634238	4.85088	-8.88175	1.00180413878302e-06	2.02475142650956e-05	5.46836	NOD2_GMTP-WT_GMTP
ENSMUSG00000040433.16	Zbtb38	0.751707	5.61426	8.87571	1.0092169649419e-06	2.03788761436639e-05	5.41034	NOD2_GMTP-WT_GMTP
ENSMUSG00000026042.16	Col5a2	-1.66629	1.94999	-8.86607	1.02114432967853e-06	2.06010790489304e-05	5.85264	NOD2_GMTP-WT_GMTP
ENSMUSG00000045216.7	Hs6st1	0.585982	5.99837	8.86413	1.02356665997604e-06	2.06312943848648e-05	5.37727	NOD2_GMTP-WT_GMTP
ENSMUSG00000034248.7	Slc25a37	-0.657616	4.6903	-8.85612	1.03362798550111e-06	2.08152899282368e-05	5.44932	NOD2_GMTP-WT_GMTP
ENSMUSG00000025236.11	Adpgk	-0.593073	4.63281	-8.85406	1.03622816371899e-06	2.08488359035724e-05	5.45192	NOD2_GMTP-WT_GMTP
ENSMUSG00000002504.15	Slc9a3r2	2.54989	0.645005	8.85092	1.04021038112876e-06	2.0910102913627e-05	5.98299	NOD2_GMTP-WT_GMTP
ENSMUSG00000079685.10	Ulbp1	0.645869	4.89743	8.84906	1.04258448615437e-06	2.09389627718833e-05	5.42251	NOD2_GMTP-WT_GMTP
ENSMUSG00000035413.8	Tmem98	-5.48008	-3.98506	-8.84251	1.05096044386646e-06	2.107059326955e-05	5.23677	NOD2_GMTP-WT_GMTP
ENSMUSG00000073491.11	Ifi213	-1.17898	4.83298	-8.84246	1.05102721772102e-06	2.107059326955e-05	5.41905	NOD2_GMTP-WT_GMTP
ENSMUSG00000017765.17	Slc12a4	-0.540444	6.16732	-8.83876	1.05578981330637e-06	2.11470719069166e-05	5.33748	NOD2_GMTP-WT_GMTP
ENSMUSG00000051457.7	Spn	-0.635979	5.36812	-8.83674	1.05839888779189e-06	2.11803178325564e-05	5.37383	NOD2_GMTP-WT_GMTP
ENSMUSG00000027276.7	Jag1	-1.16285	3.19117	-8.83053	1.06646919718681e-06	2.13226946208148e-05	5.61298	NOD2_GMTP-WT_GMTP
ENSMUSG00000026455.14	Klhl12	0.706316	3.57	8.82439	1.07452389369762e-06	2.14645046016785e-05	5.54546	NOD2_GMTP-WT_GMTP
ENSMUSG00000024042.7	Sik1	0.567013	4.79672	8.82087	1.07916232318677e-06	2.15378791746569e-05	5.39404	NOD2_GMTP-WT_GMTP
ENSMUSG00000028124.15	Gclm	-0.549225	5.3609	-8.81073	1.09265201780536e-06	2.17876179385979e-05	5.34056	NOD2_GMTP-WT_GMTP
ENSMUSG00000046805.10	Mpeg1	0.408976	12.978	8.80694	1.09774733101195e-06	2.18696751757764e-05	5.24781	NOD2_GMTP-WT_GMTP
ENSMUSG00000026131.20	Dst	-1.50816	4.43785	-8.80192	1.10452755681541e-06	2.19851234390922e-05	5.40408	NOD2_GMTP-WT_GMTP
ENSMUSG00000026073.13	Il1r2	5.61678	-4.2967	8.78423	1.12877999547599e-06	2.24389408836657e-05	5.06064	NOD2_GMTP-WT_GMTP
ENSMUSG00000042105.18	Inpp5f	0.568666	5.31528	8.78383	1.12933852966238e-06	2.24389408836657e-05	5.30838	NOD2_GMTP-WT_GMTP
ENSMUSG00000086860.1	Gm1720	-5.17471	-4.59626	-8.78067	1.13372396757779e-06	2.25060345983659e-05	4.93944	NOD2_GMTP-WT_GMTP
ENSMUSG00000015222.18	Map2	-1.80043	0.753335	-8.77475	1.14200670429998e-06	2.26503071938182e-05	5.87888	NOD2_GMTP-WT_GMTP
ENSMUSG00000037415.7	Ranbp10	0.448163	6.44618	8.77211	1.14572522969675e-06	2.27038783749765e-05	5.24064	NOD2_GMTP-WT_GMTP
ENSMUSG00000040751.12	Lat2	0.582109	7.27204	8.76462	1.1563306717441e-06	2.2893705659828e-05	5.20709	NOD2_GMTP-WT_GMTP
ENSMUSG00000021585.10	Cast	0.511741	7.62303	8.76215	1.15985273305514e-06	2.29430798161873e-05	5.19614	NOD2_GMTP-WT_GMTP
ENSMUSG00000109324.2	Prmt1	-0.478507	5.16738	-8.76116	1.16126314330045e-06	2.29506328755208e-05	5.28848	NOD2_GMTP-WT_GMTP
ENSMUSG00000031714.9	Gab1	1.0386	4.06144	8.75651	1.16793884491442e-06	2.30535094515966e-05	5.38904	NOD2_GMTP-WT_GMTP
ENSMUSG00000028896.13	Rcc1	-0.77249	3.89954	-8.75603	1.16862342374378e-06	2.30535094515966e-05	5.40954	NOD2_GMTP-WT_GMTP
ENSMUSG00000051748.2	Wfdc21	-3.68456	-4.92797	-8.75537	1.1695680858337e-06	2.30535094515966e-05	4.78547	NOD2_GMTP-WT_GMTP
ENSMUSG00000107283.3	Mpv17	0.530826	4.56233	8.75076	1.17624100808484e-06	2.3164576887376e-05	5.32465	NOD2_GMTP-WT_GMTP
ENSMUSG00000021356.10	Irf4	1.62033	1.20764	8.74169	1.18946440014952e-06	2.34043378840708e-05	5.79041	NOD2_GMTP-WT_GMTP
ENSMUSG00000102752.1	Gm7694	1.16712	2.04988	8.74047	1.1912433173353e-06	2.34186891098701e-05	5.67855	NOD2_GMTP-WT_GMTP
ENSMUSG00000024187.15	Fam234a	0.507288	7.65784	8.73306	1.20218778991509e-06	2.36130423911755e-05	5.15747	NOD2_GMTP-WT_GMTP
ENSMUSG00000040016.16	Ptger3	1.67341	0.591747	8.73049	1.2060079530671e-06	2.36672431458102e-05	5.83791	NOD2_GMTP-WT_GMTP
ENSMUSG00000062980.15	Cped1	1.27544	1.96271	8.72773	1.21012180186776e-06	2.37271069991875e-05	5.67484	NOD2_GMTP-WT_GMTP
ENSMUSG00000036046.14	5031439G07Rik	0.472543	9.58372	8.71438	1.23024286281184e-06	2.41004468814052e-05	5.11167	NOD2_GMTP-WT_GMTP
ENSMUSG00000026077.15	Npas2	1.65494	1.10243	8.70971	1.23737597498967e-06	2.42010197204805e-05	5.76173	NOD2_GMTP-WT_GMTP
ENSMUSG00000021707.5	Dhfr	-0.810143	2.29063	-8.7096	1.23754598221074e-06	2.42010197204805e-05	5.60266	NOD2_GMTP-WT_GMTP
ENSMUSG00000056305.4	Usp39	-0.438534	5.04189	-8.69698	1.2570122663693e-06	2.45601704899284e-05	5.2135	NOD2_GMTP-WT_GMTP
ENSMUSG00000048249.14	Crebrf	0.741851	6.4738	8.69206	1.26469944564551e-06	2.46887477958778e-05	5.13503	NOD2_GMTP-WT_GMTP
ENSMUSG00000017132.17	Cyth1	0.415478	5.99256	8.68764	1.27163793245166e-06	2.48024975409038e-05	5.14771	NOD2_GMTP-WT_GMTP
ENSMUSG00000110018.2	5430437J10Rik	-2.33935	0.121005	-8.68643	1.27354589296969e-06	2.48180170391552e-05	5.81664	NOD2_GMTP-WT_GMTP
ENSMUSG00000030341.17	Tnfrsf1a	-0.458325	7.32305	-8.68506	1.27570128405868e-06	2.48383270080291e-05	5.10177	NOD2_GMTP-WT_GMTP
ENSMUSG00000025648.18	Pfkfb4	0.483464	6.07456	8.68385	1.27762008411406e-06	2.48539990730924e-05	5.13921	NOD2_GMTP-WT_GMTP
ENSMUSG00000029380.11	Cxcl1	-3.49812	-3.31205	-8.68302	1.27893982323893e-06	2.48580002403573e-05	5.36705	NOD2_GMTP-WT_GMTP
ENSMUSG00000034799.16	Unc13a	0.774796	2.87164	8.68225	1.2801537620866e-06	2.48599398550377e-05	5.47369	NOD2_GMTP-WT_GMTP
ENSMUSG00000020393.16	Kremen1	-0.473179	5.0953	-8.68007	1.28361554897825e-06	2.49054902124798e-05	5.1876	NOD2_GMTP-WT_GMTP
ENSMUSG00000022270.16	Retreg1	0.449238	6.71653	8.67761	1.28753676505356e-06	2.49541359263971e-05	5.10819	NOD2_GMTP-WT_GMTP
ENSMUSG00000089857.9	Zfp882	1.1941	1.27435	8.6771	1.28835945803834e-06	2.49541359263971e-05	5.70073	NOD2_GMTP-WT_GMTP
ENSMUSG00000029534.17	St7	-0.858146	2.91976	-8.67298	1.29495655748683e-06	2.50566972091588e-05	5.45381	NOD2_GMTP-WT_GMTP
ENSMUSG00000022108.8	Itm2b	0.439166	12.0297	8.67175	1.29693265502393e-06	2.50566972091588e-05	5.06213	NOD2_GMTP-WT_GMTP
ENSMUSG00000059401.14	Mamld1	0.720767	3.32653	8.67169	1.29702349646298e-06	2.50566972091588e-05	5.38552	NOD2_GMTP-WT_GMTP
ENSMUSG00000034484.8	Snx2	-0.373887	7.96985	-8.65797	1.31931344143698e-06	2.5465260223861e-05	5.05332	NOD2_GMTP-WT_GMTP
ENSMUSG00000022817.15	Itgb5	0.632351	9.09889	8.65272	1.32793918771229e-06	2.56095999096147e-05	5.0333	NOD2_GMTP-WT_GMTP
ENSMUSG00000015711.8	Prune1	0.627732	4.64324	8.65151	1.32993907230186e-06	2.56214231366613e-05	5.18725	NOD2_GMTP-WT_GMTP
ENSMUSG00000041939.14	Mvk	-0.783177	3.76467	-8.65096	1.33084880631876e-06	2.56214231366613e-05	5.29157	NOD2_GMTP-WT_GMTP
ENSMUSG00000031445.5	Proz	0.903669	2.42275	8.64962	1.333055314993e-06	2.56354661444261e-05	5.50445	NOD2_GMTP-WT_GMTP
ENSMUSG00000019823.17	Mical1	0.602337	6.41345	8.64913	1.33387604507142e-06	2.56354661444261e-05	5.08072	NOD2_GMTP-WT_GMTP
ENSMUSG00000031485.15	Plpbp	0.47306	5.54518	8.6441	1.34223664317457e-06	2.57673067505777e-05	5.11226	NOD2_GMTP-WT_GMTP
ENSMUSG00000027367.16	Stard7	-0.485792	5.24899	-8.6436	1.34307047705708e-06	2.57673067505777e-05	5.12901	NOD2_GMTP-WT_GMTP
ENSMUSG00000034664.13	Itga2b	3.08719	-0.734811	8.64293	1.3442004686807e-06	2.57673067505777e-05	5.78324	NOD2_GMTP-WT_GMTP
ENSMUSG00000035455.12	Fignl1	-1.00477	2.79422	-8.63847	1.35167611145771e-06	2.58883683046831e-05	5.42954	NOD2_GMTP-WT_GMTP
ENSMUSG00000022003.7	Slc25a30	0.419452	5.98127	8.63624	1.35543382715192e-06	2.59380746014072e-05	5.08062	NOD2_GMTP-WT_GMTP
ENSMUSG00000027315.13	Spint1	-1.04722	3.19753	-8.63427	1.35875476246361e-06	2.59667251828549e-05	5.35766	NOD2_GMTP-WT_GMTP
ENSMUSG00000013236.17	Ptprs	0.756409	6.3655	8.63397	1.35925850461948e-06	2.59667251828549e-05	5.06242	NOD2_GMTP-WT_GMTP
ENSMUSG00000038390.11	Gpr162	-0.718032	7.02218	-8.63068	1.36484560822533e-06	2.603801541707e-05	5.03768	NOD2_GMTP-WT_GMTP
ENSMUSG00000023106.15	Denr	-0.558107	5.55747	-8.6304	1.3653241625049e-06	2.603801541707e-05	5.09354	NOD2_GMTP-WT_GMTP
ENSMUSG00000007850.16	Hnrnph1	-0.433931	6.60593	-8.6187	1.38536400271089e-06	2.63976319320991e-05	5.03411	NOD2_GMTP-WT_GMTP
ENSMUSG00000020261.15	Slc36a1	0.574974	6.61073	8.61667	1.38885995741986e-06	2.64416657251785e-05	5.03128	NOD2_GMTP-WT_GMTP
ENSMUSG00000021277.16	Traf3	-0.594708	5.30351	-8.61277	1.39562871043556e-06	2.65478801499988e-05	5.08509	NOD2_GMTP-WT_GMTP
ENSMUSG00000056144.14	Trim34a	-0.520411	5.5076	-8.61025	1.40002982092197e-06	2.6608914305138e-05	5.06969	NOD2_GMTP-WT_GMTP
ENSMUSG00000029822.15	Osbpl3	-0.475349	5.56995	-8.6033	1.41222289766597e-06	2.68178123537198e-05	5.05711	NOD2_GMTP-WT_GMTP
ENSMUSG00000027322.11	Siglec1	0.983673	8.25846	8.59514	1.42666651835834e-06	2.70690561429674e-05	4.96598	NOD2_GMTP-WT_GMTP
ENSMUSG00000002233.13	Rhoc	0.652682	7.09353	8.59348	1.42963623614593e-06	2.71023562762312e-05	4.98669	NOD2_GMTP-WT_GMTP
ENSMUSG00000038807.19	Rap1gap2	1.41768	1.44923	8.58876	1.43808097852026e-06	2.72343730965245e-05	5.56622	NOD2_GMTP-WT_GMTP
ENSMUSG00000060012.9	Kif13b	0.701899	7.22106	8.58823	1.43904118141005e-06	2.72343730965245e-05	4.9765	NOD2_GMTP-WT_GMTP
ENSMUSG00000072941.5	Sod3	-2.1879	-0.330141	-8.58081	1.4524432822082e-06	2.74647177592471e-05	5.70495	NOD2_GMTP-WT_GMTP
ENSMUSG00000026896.14	Ifih1	-0.715142	7.08722	-8.57625	1.46075057792384e-06	2.75656360195657e-05	4.96404	NOD2_GMTP-WT_GMTP
ENSMUSG00000022236.10	Ropn1l	1.03287	1.56052	8.57603	1.46114742544381e-06	2.75656360195657e-05	5.53532	NOD2_GMTP-WT_GMTP
ENSMUSG00000062203.15	Gspt1	-0.501781	6.36285	-8.57536	1.46238857633507e-06	2.75656360195657e-05	4.98505	NOD2_GMTP-WT_GMTP
ENSMUSG00000071203.6	Naip5	0.636425	5.57052	8.57517	1.4627218682905e-06	2.75656360195657e-05	5.0199	NOD2_GMTP-WT_GMTP
ENSMUSG00000035208.16	Slfn8	-0.681623	7.19577	-8.57291	1.46686917609027e-06	2.76015289242374e-05	4.95681	NOD2_GMTP-WT_GMTP
ENSMUSG00000016253.12	Nelfcd	-0.488135	4.65079	-8.57278	1.46710049317194e-06	2.76015289242374e-05	5.08283	NOD2_GMTP-WT_GMTP
ENSMUSG00000081723.1	Gm15931	0.580777	4.11661	8.57082	1.47071891596742e-06	2.76462941634213e-05	5.13867	NOD2_GMTP-WT_GMTP
ENSMUSG00000031385.14	Plxnb3	1.04311	2.47434	8.56771	1.47644512703401e-06	2.77305724911699e-05	5.38965	NOD2_GMTP-WT_GMTP
ENSMUSG00000101903.1	Gm29291	1.60711	0.546423	8.5651	1.481272604641e-06	2.77978432526111e-05	5.63384	NOD2_GMTP-WT_GMTP
ENSMUSG00000002396.8	Ocel1	0.64427	4.56155	8.5637	1.48386947881031e-06	2.78231762022643e-05	5.07926	NOD2_GMTP-WT_GMTP
ENSMUSG00000079477.9	Rab7	0.392619	9.48567	8.56121	1.48851567966801e-06	2.7886860084326e-05	4.91005	NOD2_GMTP-WT_GMTP
ENSMUSG00000069206.14	Zfp874a	0.582912	4.01517	8.5567	1.49693889472724e-06	2.80211388909806e-05	5.13326	NOD2_GMTP-WT_GMTP
ENSMUSG00000027405.16	Nop56	-0.746614	4.71579	-8.55222	1.50536144881881e-06	2.81389602514822e-05	5.04962	NOD2_GMTP-WT_GMTP
ENSMUSG00000017309.11	Cd300lg	2.20375	-0.0564773	8.55201	1.50575532381436e-06	2.81389602514822e-05	5.65897	NOD2_GMTP-WT_GMTP
ENSMUSG00000042842.11	Serpinb6b	-0.809318	3.70212	-8.55043	1.50874570042396e-06	2.81491982737704e-05	5.16828	NOD2_GMTP-WT_GMTP
ENSMUSG00000037443.13	Cep85	-0.640822	4.98592	-8.55039	1.50882629567649e-06	2.81491982737704e-05	5.0246	NOD2_GMTP-WT_GMTP
ENSMUSG00000039813.14	Tbc1d2	0.718166	4.80368	8.54841	1.51257363711147e-06	2.81955351419117e-05	5.03653	NOD2_GMTP-WT_GMTP
ENSMUSG00000051435.11	Fhad1	-1.59265	0.119348	-8.54549	1.5181152165157e-06	2.82702511545447e-05	5.6411	NOD2_GMTP-WT_GMTP
ENSMUSG00000040502.5	Marchf9	0.929563	1.83938	8.54497	1.51911581294757e-06	2.82702511545447e-05	5.45689	NOD2_GMTP-WT_GMTP
ENSMUSG00000047409.13	Ctdspl	0.732901	2.76003	8.53777	1.53289135538804e-06	2.85028373439778e-05	5.30358	NOD2_GMTP-WT_GMTP
ENSMUSG00000038963.15	Slco4a1	-2.18951	3.5794	-8.53123	1.54552103314909e-06	2.87137475542511e-05	5.16152	NOD2_GMTP-WT_GMTP
ENSMUSG00000016559.14	H3f3b	-0.44082	8.80674	-8.52618	1.55535073247647e-06	2.88723301944655e-05	4.86814	NOD2_GMTP-WT_GMTP
ENSMUSG00000006442.10	Srm	-0.7273	3.39478	-8.52106	1.56540480380613e-06	2.90348107957824e-05	5.17693	NOD2_GMTP-WT_GMTP
ENSMUSG00000038508.7	Gdf15	-2.27671	2.00722	-8.51762	1.57217602922456e-06	2.91361825083784e-05	5.39683	NOD2_GMTP-WT_GMTP
ENSMUSG00000048126.16	Col6a3	-1.11675	1.78013	-8.49501	1.61753628290511e-06	2.99519394858604e-05	5.40025	NOD2_GMTP-WT_GMTP
ENSMUSG00000028917.14	Plekhm2	0.503258	7.20049	8.49001	1.62777225064762e-06	3.00581805474925e-05	4.84641	NOD2_GMTP-WT_GMTP
ENSMUSG00000025037.6	Maoa	0.608932	3.59285	8.48974	1.62831770104866e-06	3.00581805474925e-05	5.10456	NOD2_GMTP-WT_GMTP
ENSMUSG00000042489.15	Clspn	-1.10258	2.89399	-8.48972	1.62835534848931e-06	3.00581805474925e-05	5.21804	NOD2_GMTP-WT_GMTP
ENSMUSG00000041112.17	Elmo1	-0.606974	6.00461	-8.48957	1.62866222748704e-06	3.00581805474925e-05	4.88518	NOD2_GMTP-WT_GMTP
ENSMUSG00000051335.6	Gfod1	1.2675	1.91027	8.48703	1.63389240463238e-06	3.01163275912541e-05	5.37119	NOD2_GMTP-WT_GMTP
ENSMUSG00000002068.16	Ccne1	-0.801316	2.32255	-8.48673	1.63451228938326e-06	3.01163275912541e-05	5.30791	NOD2_GMTP-WT_GMTP
ENSMUSG00000003541.6	Ier3	-0.866285	2.72714	-8.4746	1.65970966845747e-06	3.05553645480952e-05	5.22588	NOD2_GMTP-WT_GMTP
ENSMUSG00000040152.8	Thbs1	1.03021	4.03174	8.47347	1.66206859158958e-06	3.05735667635106e-05	5.02075	NOD2_GMTP-WT_GMTP
ENSMUSG00000062867.13	Impdh2	-0.623114	5.65832	-8.46944	1.67054610788623e-06	3.07041971213059e-05	4.87449	NOD2_GMTP-WT_GMTP
ENSMUSG00000030789.9	Itgax	0.576514	8.25829	8.468	1.67358231702859e-06	3.07346849710774e-05	4.79679	NOD2_GMTP-WT_GMTP
ENSMUSG00000032265.14	Tent5a	0.536968	7.16863	8.4648	1.68036139304588e-06	3.07918149087965e-05	4.81353	NOD2_GMTP-WT_GMTP
ENSMUSG00000106734.3	Gm20559	-0.525968	6.10559	-8.46437	1.68125801789157e-06	3.07918149087965e-05	4.84718	NOD2_GMTP-WT_GMTP
ENSMUSG00000058427.10	Cxcl2	-2.24163	0.527109	-8.46427	1.68147324303475e-06	3.07918149087965e-05	5.50727	NOD2_GMTP-WT_GMTP
ENSMUSG00000035517.17	Tdrd7	-0.451684	6.54046	-8.46393	1.68221316603876e-06	3.07918149087965e-05	4.83055	NOD2_GMTP-WT_GMTP
ENSMUSG00000096780.7	Tmem181b-ps	0.77657	2.68376	8.45956	1.69151434084631e-06	3.09366881043473e-05	5.21319	NOD2_GMTP-WT_GMTP
ENSMUSG00000055546.6	Timd4	1.49029	0.669354	8.44925	1.71369412932321e-06	3.12902659345495e-05	5.47474	NOD2_GMTP-WT_GMTP
ENSMUSG00000062082.16	Cd200r4	0.592358	6.4281	8.44888	1.71450678461694e-06	3.12902659345495e-05	4.81433	NOD2_GMTP-WT_GMTP
ENSMUSG00000025932.14	Eya1	-0.643665	4.15376	-8.44862	1.71505379097181e-06	3.12902659345495e-05	4.9718	NOD2_GMTP-WT_GMTP
ENSMUSG00000032946.16	Rasgrp2	1.50893	1.00284	8.44582	1.72115330072916e-06	3.1375893463374e-05	5.43543	NOD2_GMTP-WT_GMTP
ENSMUSG00000041308.6	Sntb2	0.754827	6.11477	8.4425	1.72839411584197e-06	3.1482169719822e-05	4.81754	NOD2_GMTP-WT_GMTP
ENSMUSG00000051339.10	2900026A02Rik	-0.901844	2.72307	-8.43892	1.73624066260707e-06	3.1599296822799e-05	5.1794	NOD2_GMTP-WT_GMTP
ENSMUSG00000032018.14	Sc5d	-0.51367	5.31597	-8.43596	1.74275179494941e-06	3.16687095829532e-05	4.84933	NOD2_GMTP-WT_GMTP
ENSMUSG00000020577.17	Tspan13	0.711513	4.55865	8.4359	1.74289317294253e-06	3.16687095829532e-05	4.90958	NOD2_GMTP-WT_GMTP
ENSMUSG00000030036.8	Mogs	-0.694553	5.15043	-8.43048	1.754889059765e-06	3.18495890712434e-05	4.85293	NOD2_GMTP-WT_GMTP
ENSMUSG00000029430.13	Ran	-0.532713	6.83029	-8.43011	1.75570270952491e-06	3.18495890712434e-05	4.77626	NOD2_GMTP-WT_GMTP
ENSMUSG00000062866.16	Phactr2	0.794131	5.99933	8.4231	1.77137587581707e-06	3.21078065939124e-05	4.79648	NOD2_GMTP-WT_GMTP
ENSMUSG00000022793.17	B4galt4	-0.562176	3.55093	-8.42161	1.77471992550333e-06	3.21423098196071e-05	5.02027	NOD2_GMTP-WT_GMTP
ENSMUSG00000007891.16	Ctsd	0.470077	12.352	8.41961	1.77922217653697e-06	3.21977164842411e-05	4.72972	NOD2_GMTP-WT_GMTP
ENSMUSG00000018906.14	P4ha2	-1.20841	1.59826	-8.41177	1.7970083565759e-06	3.24932313292366e-05	5.31676	NOD2_GMTP-WT_GMTP
ENSMUSG00000036381.13	P2ry14	0.446553	6.0964	8.40871	1.80398313791576e-06	3.25929358350723e-05	4.77297	NOD2_GMTP-WT_GMTP
ENSMUSG00000038668.14	Lpar1	-1.79355	-0.376496	-8.40523	1.81196639145445e-06	3.27106845408764e-05	5.48812	NOD2_GMTP-WT_GMTP
ENSMUSG00000040528.15	Milr1	-0.403907	6.57447	-8.39115	1.84467401078151e-06	3.32742208589877e-05	4.73181	NOD2_GMTP-WT_GMTP
ENSMUSG00000017499.15	Cdc6	-0.755828	2.315	-8.38484	1.85951516469061e-06	3.34894203468609e-05	5.17472	NOD2_GMTP-WT_GMTP
ENSMUSG00000028034.15	Fubp1	-0.537389	5.34408	-8.3848	1.85960614035588e-06	3.34894203468609e-05	4.77895	NOD2_GMTP-WT_GMTP
ENSMUSG00000020818.16	Mfsd11	0.405611	7.42337	8.36072	1.91748930131966e-06	3.45039828873755e-05	4.66762	NOD2_GMTP-WT_GMTP
ENSMUSG00000073125.10	Xlr3b	-1.72652	0.420625	-8.35706	1.92645299928186e-06	3.46373455060243e-05	5.37906	NOD2_GMTP-WT_GMTP
ENSMUSG00000037126.16	Psd	-1.20869	2.17597	-8.35386	1.93431277890563e-06	3.47506610593569e-05	5.15556	NOD2_GMTP-WT_GMTP
ENSMUSG00000024776.18	Stambpl1	0.584135	4.47778	8.34937	1.94543381987681e-06	3.49223369452223e-05	4.80202	NOD2_GMTP-WT_GMTP
ENSMUSG00000021759.14	Plpp1	-2.73771	-0.146139	-8.34656	1.95240988400148e-06	3.50193904676247e-05	5.40494	NOD2_GMTP-WT_GMTP
ENSMUSG00000051864.10	Tbc1d22a	0.419037	6.75519	8.33505	1.98130209484359e-06	3.55090711985903e-05	4.6504	NOD2_GMTP-WT_GMTP
ENSMUSG00000016619.10	Nup50	0.402161	6.32389	8.3309	1.9918460293126e-06	3.56693904109566e-05	4.65922	NOD2_GMTP-WT_GMTP
ENSMUSG00000031216.13	Stard8	0.526207	6.45153	8.3286	1.99769790975039e-06	3.57454959585088e-05	4.65162	NOD2_GMTP-WT_GMTP
ENSMUSG00000001128.7	Cfp	0.598051	7.64386	8.32775	1.99986083547471e-06	3.5755524697073e-05	4.6184	NOD2_GMTP-WT_GMTP
ENSMUSG00000109715.1	Gm45606	0.670874	2.73351	8.32386	2.00983187494764e-06	3.5905026922103e-05	5.02455	NOD2_GMTP-WT_GMTP
ENSMUSG00000040990.17	Sh3kbp1	0.39164	7.28697	8.32218	2.01414834248281e-06	3.59533535726551e-05	4.61872	NOD2_GMTP-WT_GMTP
ENSMUSG00000016528.10	Mapkapk2	-0.53969	8.18594	-8.31726	2.02686190413508e-06	3.61513746338658e-05	4.59489	NOD2_GMTP-WT_GMTP
ENSMUSG00000020156.16	Pwwp3a	-0.585229	4.28119	-8.31507	2.03255780892512e-06	3.61971007277379e-05	4.77754	NOD2_GMTP-WT_GMTP
ENSMUSG00000104068.1	Gm37199	1.44871	0.181343	8.31502	2.03267006730855e-06	3.61971007277379e-05	5.34425	NOD2_GMTP-WT_GMTP
ENSMUSG00000018547.8	Pip4k2b	-0.519274	6.40343	-8.30891	2.04862301897931e-06	3.64520936383455e-05	4.62665	NOD2_GMTP-WT_GMTP
ENSMUSG00000050244.9	Heatr1	-0.617645	5.40058	-8.29394	2.08827742790938e-06	3.71280750987585e-05	4.65279	NOD2_GMTP-WT_GMTP
ENSMUSG00000001175.16	Calm1	-0.33039	9.50819	-8.29213	2.09314158952673e-06	3.71849269801831e-05	4.5486	NOD2_GMTP-WT_GMTP
ENSMUSG00000076586.2	Igkv8-21	5.70509	-6.87417	8.28633	2.10875284335393e-06	3.74324599791219e-05	3.64085	NOD2_GMTP-WT_GMTP
ENSMUSG00000021143.10	Pacs2	0.478685	7.42791	8.28285	2.11819038409887e-06	3.75700970114452e-05	4.56206	NOD2_GMTP-WT_GMTP
ENSMUSG00000023809.10	Rps6ka2	0.706508	5.37868	8.27509	2.13938694429287e-06	3.79159181000848e-05	4.62856	NOD2_GMTP-WT_GMTP
ENSMUSG00000002345.18	Borcs8	0.584988	4.23772	8.27317	2.14466595643051e-06	3.79793107030429e-05	4.72603	NOD2_GMTP-WT_GMTP
ENSMUSG00000022299.9	Slc25a32	0.573423	4.63561	8.26618	2.1640085314566e-06	3.82795828607038e-05	4.67355	NOD2_GMTP-WT_GMTP
ENSMUSG00000079414.3	Gm11110	-1.9961	-0.559086	-8.26545	2.16602319068352e-06	3.82795828607038e-05	5.31703	NOD2_GMTP-WT_GMTP
ENSMUSG00000024529.14	Lox	-0.859053	4.30228	-8.26518	2.16676884117191e-06	3.82795828607038e-05	4.70753	NOD2_GMTP-WT_GMTP
ENSMUSG00000042272.17	Sestd1	0.495621	6.4497	8.26157	2.17685902000792e-06	3.84274171783518e-05	4.56074	NOD2_GMTP-WT_GMTP
ENSMUSG00000024095.15	Hnrnpll	0.366533	6.28498	8.26068	2.17932911561505e-06	3.8440609135746e-05	4.56547	NOD2_GMTP-WT_GMTP
ENSMUSG00000078945.10	Naip2	0.543135	6.98567	8.25876	2.18473531086402e-06	3.8505528429154e-05	4.54025	NOD2_GMTP-WT_GMTP
ENSMUSG00000060512.7	0610040J01Rik	1.45142	0.672142	8.25026	2.20873172867815e-06	3.88977356448268e-05	5.21659	NOD2_GMTP-WT_GMTP
ENSMUSG00000036564.17	Ndrg4	-2.2691	-1.42335	-8.24743	2.21678700416905e-06	3.90088079053817e-05	5.27732	NOD2_GMTP-WT_GMTP
ENSMUSG00000035545.13	Leng8	-0.458069	6.09519	-8.24528	2.22293886459036e-06	3.90862371044954e-05	4.55195	NOD2_GMTP-WT_GMTP
ENSMUSG00000030365.11	Clec2i	1.22457	1.08959	8.24394	2.22676638445161e-06	3.90991535073786e-05	5.16159	NOD2_GMTP-WT_GMTP
ENSMUSG00000021363.14	Mak	0.97672	1.5997	8.2438	2.22717806246933e-06	3.90991535073786e-05	5.09486	NOD2_GMTP-WT_GMTP
ENSMUSG00000071644.10	Eef1g	-0.435084	8.06158	-8.23586	2.25005829128426e-06	3.94697725262781e-05	4.48604	NOD2_GMTP-WT_GMTP
ENSMUSG00000008129.14	4930432K21Rik	1.6434	-0.294118	8.23281	2.25891403487803e-06	3.95939896781096e-05	5.26708	NOD2_GMTP-WT_GMTP
ENSMUSG00000055013.16	Agap1	0.579916	6.70523	8.22837	2.27188613986855e-06	3.97901063099584e-05	4.50705	NOD2_GMTP-WT_GMTP
ENSMUSG00000005299.6	Letm1	-0.482168	5.83121	-8.22099	2.29360185779015e-06	4.01389319630365e-05	4.53058	NOD2_GMTP-WT_GMTP
ENSMUSG00000090125.3	Pou3f1	1.18122	3.22969	8.21933	2.29849596150831e-06	4.01930567312969e-05	4.80019	NOD2_GMTP-WT_GMTP
ENSMUSG00000026893.4	Gca	-0.762858	2.914	-8.21714	2.30500579165469e-06	4.02753282922404e-05	4.85056	NOD2_GMTP-WT_GMTP
ENSMUSG00000035164.8	Zc3h12c	-1.16811	4.11155	-8.21447	2.31295733255707e-06	4.03826423797698e-05	4.66166	NOD2_GMTP-WT_GMTP
ENSMUSG00000020185.16	E2f7	-1.4726	0.890158	-8.2131	2.31706630737094e-06	4.04227525538451e-05	5.14419	NOD2_GMTP-WT_GMTP
ENSMUSG00000072812.4	Ahnak2	0.631628	6.87141	8.20701	2.33532485261496e-06	4.07094558096856e-05	4.47292	NOD2_GMTP-WT_GMTP
ENSMUSG00000040945.13	Rcc2	-0.425006	6.87959	-8.20597	2.33847106698595e-06	4.07324784681166e-05	4.47126	NOD2_GMTP-WT_GMTP
ENSMUSG00000025332.14	Kdm5c	-0.549345	6.84918	-8.20123	2.35284061438611e-06	4.09508054826812e-05	4.46565	NOD2_GMTP-WT_GMTP
ENSMUSG00000042675.15	Ypel3	0.528455	6.28526	8.198	2.36267615149817e-06	4.10899399597652e-05	4.47994	NOD2_GMTP-WT_GMTP
ENSMUSG00000028410.13	Dnaja1	-0.426687	7.42878	-8.1968	2.36635515515991e-06	4.11218711659525e-05	4.44468	NOD2_GMTP-WT_GMTP
ENSMUSG00000018001.18	Cyth3	0.417121	5.66018	8.19178	2.38173999023685e-06	4.13570150989531e-05	4.49906	NOD2_GMTP-WT_GMTP
ENSMUSG00000079442.12	St6galnac4	0.494557	6.28947	8.18842	2.39211087081245e-06	4.15047977141822e-05	4.46667	NOD2_GMTP-WT_GMTP
ENSMUSG00000032652.13	Crebl2	0.48363	4.5212	8.18697	2.39661483214865e-06	4.1518471162144e-05	4.57712	NOD2_GMTP-WT_GMTP
ENSMUSG00000014547.10	Wdfy2	0.676662	6.85631	8.18694	2.39670490264514e-06	4.1518471162144e-05	4.44589	NOD2_GMTP-WT_GMTP
ENSMUSG00000029993.16	Nfu1	-0.482596	5.18931	-8.18637	2.39848112436712e-06	4.1518471162144e-05	4.51973	NOD2_GMTP-WT_GMTP
ENSMUSG00000000247.11	Lhx2	-1.84993	-0.752776	-8.1733	2.43937807866921e-06	4.21936767979426e-05	5.2034	NOD2_GMTP-WT_GMTP
ENSMUSG00000039891.6	Txlnb	-4.79653	-2.71032	-8.1659	2.46286351602459e-06	4.25669044407875e-05	5.00057	NOD2_GMTP-WT_GMTP
ENSMUSG00000040659.3	Efhd2	-0.525095	9.5528	-8.16125	2.47775649972237e-06	4.27770715892803e-05	4.36963	NOD2_GMTP-WT_GMTP
ENSMUSG00000105741.1	C79130	1.60075	-1.07264	8.16091	2.47885777640566e-06	4.27770715892803e-05	5.18559	NOD2_GMTP-WT_GMTP
ENSMUSG00000000056.7	Narf	0.465992	4.99456	8.1516	2.50895843424984e-06	4.32630521973854e-05	4.48623	NOD2_GMTP-WT_GMTP
ENSMUSG00000052102.15	Gnpda1	0.376689	7.57275	8.14562	2.52851306461774e-06	4.35665729813248e-05	4.3714	NOD2_GMTP-WT_GMTP
ENSMUSG00000035711.5	Dok3	-0.521729	5.80828	-8.14423	2.53307864471902e-06	4.36115615737774e-05	4.42661	NOD2_GMTP-WT_GMTP
ENSMUSG00000041607.17	Mbp	0.443018	6.538	8.14219	2.53981007527751e-06	4.36937411022876e-05	4.39437	NOD2_GMTP-WT_GMTP
ENSMUSG00000073590.3	3222401L13Rik	1.2956	0.205016	8.14097	2.54380895290428e-06	4.37288206210733e-05	5.11681	NOD2_GMTP-WT_GMTP
ENSMUSG00000039232.12	Stx11	-0.821073	3.47577	-8.13249	2.57201492280951e-06	4.41796527887979e-05	4.64143	NOD2_GMTP-WT_GMTP
ENSMUSG00000049327.17	Kmt5a	-0.496074	6.28655	-8.12669	2.59145044815446e-06	4.44792568074388e-05	4.38205	NOD2_GMTP-WT_GMTP
ENSMUSG00000026786.14	Apbb1ip	-0.32876	7.50741	-8.11348	2.63638099772418e-06	4.52156565735739e-05	4.32855	NOD2_GMTP-WT_GMTP
ENSMUSG00000085208.3	Brip1os	-0.413775	5.79915	-8.10512	2.66523247563041e-06	4.56753703753774e-05	4.37324	NOD2_GMTP-WT_GMTP
ENSMUSG00000024339.12	Tap2	-0.622659	6.11006	-8.10412	2.66872967002948e-06	4.57002034745723e-05	4.35787	NOD2_GMTP-WT_GMTP
ENSMUSG00000085213.1	Gm13091	0.878172	2.02932	8.10177	2.67690258057758e-06	4.580500558315e-05	4.84064	NOD2_GMTP-WT_GMTP
ENSMUSG00000118084.1	AA388235	1.80935	-0.126731	8.10024	2.68223748553547e-06	4.58611226166689e-05	5.08744	NOD2_GMTP-WT_GMTP
ENSMUSG00000046949.16	Nqo2	0.480734	5.37935	8.09888	2.6870151454871e-06	4.58903035623108e-05	4.38745	NOD2_GMTP-WT_GMTP
ENSMUSG00000010051.15	Hyal1	0.768738	2.90604	8.09858	2.68805748917404e-06	4.58903035623108e-05	4.69077	NOD2_GMTP-WT_GMTP
ENSMUSG00000058799.16	Nap1l1	-0.390251	7.60075	-8.09648	2.695408854753e-06	4.59594178439878e-05	4.3031	NOD2_GMTP-WT_GMTP
ENSMUSG00000049409.9	Prokr1	0.985774	3.46819	8.09625	2.69622542722987e-06	4.59594178439878e-05	4.59306	NOD2_GMTP-WT_GMTP
ENSMUSG00000026490.18	Cdc42bpa	-1.35226	1.58615	-8.09101	2.71472083568542e-06	4.6239363363854e-05	4.89216	NOD2_GMTP-WT_GMTP
ENSMUSG00000030630.16	Fah	1.04163	1.60321	8.08683	2.72954422473392e-06	4.64563846578856e-05	4.88411	NOD2_GMTP-WT_GMTP
ENSMUSG00000025068.8	Gsto1	0.452139	6.18715	8.0853	2.73503019072326e-06	4.65142748823233e-05	4.32887	NOD2_GMTP-WT_GMTP
ENSMUSG00000022114.5	Spry2	-0.677563	2.61715	-8.08311	2.74284487364488e-06	4.65865691022346e-05	4.71879	NOD2_GMTP-WT_GMTP
ENSMUSG00000042759.12	Apobr	-0.444145	7.57947	-8.08294	2.7434568099465e-06	4.65865691022346e-05	4.28484	NOD2_GMTP-WT_GMTP
ENSMUSG00000026031.15	Cflar	-0.65595	7.08138	-8.07999	2.75404830837802e-06	4.67308592432234e-05	4.2925	NOD2_GMTP-WT_GMTP
ENSMUSG00000038546.9	Ranbp9	0.383091	6.33237	8.07594	2.76863767998685e-06	4.69427147063424e-05	4.3103	NOD2_GMTP-WT_GMTP
ENSMUSG00000031617.16	Tmem184c	0.587921	4.83916	8.07384	2.77624527968816e-06	4.70359612191966e-05	4.3918	NOD2_GMTP-WT_GMTP
ENSMUSG00000032344.17	Cgas	-0.633497	3.90795	-8.06885	2.79439380996972e-06	4.73075182715131e-05	4.48934	NOD2_GMTP-WT_GMTP
ENSMUSG00000061175.12	Fnip2	0.559293	8.94866	8.06294	2.81608787763964e-06	4.76386420119586e-05	4.23774	NOD2_GMTP-WT_GMTP
ENSMUSG00000018593.13	Sparc	-1.00837	3.407	-8.05216	2.85605732962952e-06	4.82781872697148e-05	4.54266	NOD2_GMTP-WT_GMTP
ENSMUSG00000037366.14	Pafah2	0.452042	4.11728	8.04573	2.88018424996132e-06	4.86491681827304e-05	4.42953	NOD2_GMTP-WT_GMTP
ENSMUSG00000024006.17	Stk38	0.37581	7.43079	8.04246	2.89256483224384e-06	4.88213306368055e-05	4.23198	NOD2_GMTP-WT_GMTP
ENSMUSG00000041707.8	Tmem273	0.763753	4.97517	8.03808	2.90919254462503e-06	4.90648626214802e-05	4.33135	NOD2_GMTP-WT_GMTP
ENSMUSG00000031740.8	Mmp2	-1.60477	0.902288	-8.03646	2.91540614300703e-06	4.91325205958578e-05	4.90798	NOD2_GMTP-WT_GMTP
ENSMUSG00000020689.4	Itgb3	0.812509	3.87082	8.03555	2.91887098841977e-06	4.91537874449889e-05	4.44882	NOD2_GMTP-WT_GMTP
ENSMUSG00000024451.9	Arap3	-0.52596	6.03911	-8.02888	2.94450476906867e-06	4.95228675757034e-05	4.25687	NOD2_GMTP-WT_GMTP
ENSMUSG00000027589.14	Pcmtd2	0.474902	5.49764	8.02869	2.94522678586288e-06	4.95228675757034e-05	4.28339	NOD2_GMTP-WT_GMTP
ENSMUSG00000037217.15	Syn1	0.625925	4.38412	8.02605	2.9554614763565e-06	4.96375748074606e-05	4.37038	NOD2_GMTP-WT_GMTP
ENSMUSG00000041797.7	Abca9	1.07619	5.34661	8.0256	2.95718018433176e-06	4.96375748074606e-05	4.28816	NOD2_GMTP-WT_GMTP
ENSMUSG00000022807.9	Osbpl11	0.477198	7.09022	8.02521	2.95872247093275e-06	4.96375748074606e-05	4.21636	NOD2_GMTP-WT_GMTP
ENSMUSG00000022551.8	Cyc1	-0.47448	5.73557	-8.01969	2.98021697248624e-06	4.99606170601694e-05	4.25816	NOD2_GMTP-WT_GMTP
ENSMUSG00000026043.18	Col3a1	-1.25379	1.60318	-8.01912	2.98246218785321e-06	4.99607198179946e-05	4.79248	NOD2_GMTP-WT_GMTP
ENSMUSG00000072946.12	Ptgr2	0.43842	5.52582	8.01673	2.99182858714563e-06	5.00800234545989e-05	4.26523	NOD2_GMTP-WT_GMTP
ENSMUSG00000024335.20	Brd2	-0.341288	8.20102	-8.00847	3.02446007739482e-06	5.05882891356151e-05	4.17064	NOD2_GMTP-WT_GMTP
ENSMUSG00000053819.16	Camk2d	-0.397751	6.15085	-8.00337	3.04480356867018e-06	5.08904135039234e-05	4.21674	NOD2_GMTP-WT_GMTP
ENSMUSG00000054766.13	Set	-0.422533	7.22438	-7.99967	3.05964736429962e-06	5.10947219907532e-05	4.1774	NOD2_GMTP-WT_GMTP
ENSMUSG00000033880.11	Lgals3bp	-0.427532	10.4366	-7.99918	3.06160728282334e-06	5.10947219907532e-05	4.14423	NOD2_GMTP-WT_GMTP
ENSMUSG00000027134.4	Lpcat4	-1.14349	2.03533	-7.99448	3.08059830487915e-06	5.13732361560303e-05	4.69367	NOD2_GMTP-WT_GMTP
ENSMUSG00000037661.14	Gpr160	0.79026	2.56355	7.99149	3.09273146128218e-06	5.15370553365118e-05	4.60251	NOD2_GMTP-WT_GMTP
ENSMUSG00000029330.8	Cds1	-0.502891	4.58254	-7.98578	3.11603157540644e-06	5.18865765239133e-05	4.2934	NOD2_GMTP-WT_GMTP
ENSMUSG00000048142.9	Nat8l	1.16287	2.7201	7.97439	3.16314719116208e-06	5.26318443522741e-05	4.55219	NOD2_GMTP-WT_GMTP
ENSMUSG00000032113.16	Chek1	-1.55598	0.820378	-7.97017	3.18078876019725e-06	5.28859460553512e-05	4.8286	NOD2_GMTP-WT_GMTP
ENSMUSG00000035198.9	Tubg1	-0.639635	4.10386	-7.96477	3.20352754467223e-06	5.32243559972237e-05	4.3191	NOD2_GMTP-WT_GMTP
ENSMUSG00000030515.9	Tarsl2	0.611378	3.32031	7.96266	3.21245182306183e-06	5.3332914827365e-05	4.4333	NOD2_GMTP-WT_GMTP
ENSMUSG00000037411.10	Serpine1	-1.2569	1.58234	-7.95931	3.22666144645907e-06	5.35289939441198e-05	4.71408	NOD2_GMTP-WT_GMTP
ENSMUSG00000031812.16	Map1lc3b	0.437223	7.33598	7.95794	3.23252010326756e-06	5.35863455157571e-05	4.11653	NOD2_GMTP-WT_GMTP
ENSMUSG00000078349.3	AW011738	-0.945774	1.78198	-7.95437	3.24775048495668e-06	5.3798854172857e-05	4.67785	NOD2_GMTP-WT_GMTP
ENSMUSG00000074227.12	Spint2	-2.53566	-0.83277	-7.95119	3.26142159177273e-06	5.39852373718286e-05	4.92071	NOD2_GMTP-WT_GMTP
ENSMUSG00000034659.14	Tmem109	-0.393204	6.1327	-7.94824	3.27414436965659e-06	5.41556585027038e-05	4.14061	NOD2_GMTP-WT_GMTP
ENSMUSG00000039050.8	Osbpl2	0.405725	5.42462	7.94312	3.2963921494303e-06	5.44832578001766e-05	4.16847	NOD2_GMTP-WT_GMTP
ENSMUSG00000026094.14	Stk17b	-0.48852	6.09553	-7.93699	3.32319318695085e-06	5.48855733385893e-05	4.12638	NOD2_GMTP-WT_GMTP
ENSMUSG00000112095.1	A130077B15Rik	0.613441	2.63964	7.93403	3.3362074169517e-06	5.50233713275769e-05	4.51014	NOD2_GMTP-WT_GMTP
ENSMUSG00000104000.1	Gm38335	1.42698	0.861552	7.93398	3.33646848949991e-06	5.50233713275769e-05	4.77485	NOD2_GMTP-WT_GMTP
ENSMUSG00000048897.15	Zfp710	-0.400147	7.83791	-7.93119	3.34878766841679e-06	5.5185745380638e-05	4.06864	NOD2_GMTP-WT_GMTP
ENSMUSG00000057329.7	Bcl2	-1.37724	2.13185	-7.92515	3.37566677782411e-06	5.55876404528335e-05	4.58307	NOD2_GMTP-WT_GMTP
ENSMUSG00000029705.17	Cux1	-0.38291	7.43237	-7.92117	3.3934899148115e-06	5.58399265996969e-05	4.06282	NOD2_GMTP-WT_GMTP
ENSMUSG00000073771.11	Btbd19	-1.13594	1.61536	-7.91843	3.4058175994386e-06	5.59931019814767e-05	4.65341	NOD2_GMTP-WT_GMTP
ENSMUSG00000002227.15	Mov10	-0.55568	6.0197	-7.91769	3.4091498029958e-06	5.59931019814767e-05	4.10268	NOD2_GMTP-WT_GMTP
ENSMUSG00000090035.3	Galnt4	0.512967	5.11198	7.91726	3.41107091084738e-06	5.59931019814767e-05	4.15294	NOD2_GMTP-WT_GMTP
ENSMUSG00000040010.10	Slc7a5	-1.09419	1.63583	-7.91687	3.41283640455377e-06	5.59931019814767e-05	4.64829	NOD2_GMTP-WT_GMTP
ENSMUSG00000003813.15	Rad23a	-0.498928	5.65563	-7.90475	3.46810537659216e-06	5.68580714679654e-05	4.10178	NOD2_GMTP-WT_GMTP
ENSMUSG00000004359.16	Spic	1.03544	1.69145	7.9003	3.48861577771373e-06	5.7152337627112e-05	4.61731	NOD2_GMTP-WT_GMTP
ENSMUSG00000031337.16	Mtm1	0.470851	5.626	7.89634	3.50697744751361e-06	5.74109961748871e-05	4.09164	NOD2_GMTP-WT_GMTP
ENSMUSG00000059447.13	Hadhb	0.511063	6.02409	7.89382	3.51874704418862e-06	5.75614390007189e-05	4.06902	NOD2_GMTP-WT_GMTP
ENSMUSG00000050043.16	Tmx2	-0.390939	5.15231	-7.89141	3.53002633956573e-06	5.7703646677458e-05	4.1138	NOD2_GMTP-WT_GMTP
ENSMUSG00000025854.15	Fam20c	0.514047	8.54347	7.89019	3.53574103054398e-06	5.77147635411917e-05	4.00074	NOD2_GMTP-WT_GMTP
ENSMUSG00000059325.14	Hopx	1.18906	0.766872	7.89016	3.53587961102537e-06	5.77147635411917e-05	4.72675	NOD2_GMTP-WT_GMTP
ENSMUSG00000057469.8	E2f6	-0.469394	4.27302	-7.88387	3.56553989105929e-06	5.81563535008815e-05	4.18537	NOD2_GMTP-WT_GMTP
ENSMUSG00000021608.15	Lpcat1	0.363419	5.95308	7.88135	3.57747202022226e-06	5.83083514881076e-05	4.05462	NOD2_GMTP-WT_GMTP
ENSMUSG00000028800.15	Hdac1	-0.481341	5.86797	-7.87861	3.59051840905088e-06	5.84782753731039e-05	4.0546	NOD2_GMTP-WT_GMTP
ENSMUSG00000115142.1	Gm33251	2.21239	0.331222	7.87658	3.60023922745075e-06	5.85938277768845e-05	4.755	NOD2_GMTP-WT_GMTP
ENSMUSG00000078486.3	Perm1	-1.0098	2.67973	-7.85567	3.70178432396234e-06	6.02025609479385e-05	4.39454	NOD2_GMTP-WT_GMTP
ENSMUSG00000019850.11	Tnfaip3	-0.444188	5.54636	-7.85073	3.72624054397241e-06	6.05561582357294e-05	4.03194	NOD2_GMTP-WT_GMTP
ENSMUSG00000048677.9	Tpcn2	0.423907	6.97474	7.84526	3.75345666903879e-06	6.09540601573963e-05	3.96754	NOD2_GMTP-WT_GMTP
ENSMUSG00000063611.5	Gm10134	-1.16451	2.17348	-7.84006	3.77958191604857e-06	6.13336809402123e-05	4.45855	NOD2_GMTP-WT_GMTP
ENSMUSG00000052837.7	Junb	-0.732701	7.34416	-7.83459	3.80723065160509e-06	6.17374545997561e-05	3.94309	NOD2_GMTP-WT_GMTP
ENSMUSG00000043323.17	Fbrsl1	-0.487523	4.96181	-7.83368	3.81189257044141e-06	6.17681618912558e-05	4.04684	NOD2_GMTP-WT_GMTP
ENSMUSG00000071379.2	Hpcal1	0.550083	7.25866	7.83313	3.81469181270849e-06	6.17686635827028e-05	3.94307	NOD2_GMTP-WT_GMTP
ENSMUSG00000032280.16	Tle3	0.551816	5.62794	7.82364	3.86328515596494e-06	6.25101390029338e-05	3.9892	NOD2_GMTP-WT_GMTP
ENSMUSG00000001056.3	Nhp2	-0.573272	4.93335	-7.82243	3.86953910607559e-06	6.25659609230903e-05	4.03331	NOD2_GMTP-WT_GMTP
ENSMUSG00000004296.14	Il12b	-7.45777	-2.38464	-7.82067	3.87862921347501e-06	6.26675261696364e-05	4.65851	NOD2_GMTP-WT_GMTP
ENSMUSG00000002307.16	Daxx	-0.472744	6.65473	-7.81979	3.88322079547833e-06	6.26963137550709e-05	3.9412	NOD2_GMTP-WT_GMTP
ENSMUSG00000021069.17	Pygl	0.472424	6.40253	7.81893	3.88766121703685e-06	6.27226209224464e-05	3.94858	NOD2_GMTP-WT_GMTP
ENSMUSG00000052566.8	Hook2	-0.549812	4.35782	-7.81772	3.89395395237066e-06	6.27787532798024e-05	4.08219	NOD2_GMTP-WT_GMTP
ENSMUSG00000029364.15	Wsb2	0.508089	7.45357	7.81675	3.89899914088494e-06	6.28015538803208e-05	3.91536	NOD2_GMTP-WT_GMTP
ENSMUSG00000028645.11	Slc2a1	-0.626246	5.134	-7.81637	3.90099734137609e-06	6.28015538803208e-05	4.00951	NOD2_GMTP-WT_GMTP
ENSMUSG00000028517.8	Plpp3	0.739797	3.86163	7.81486	3.90889484247749e-06	6.28833241674118e-05	4.1424	NOD2_GMTP-WT_GMTP
ENSMUSG00000034893.9	Cog3	0.388296	5.51837	7.8088	3.94065160587151e-06	6.33485297419388e-05	3.97434	NOD2_GMTP-WT_GMTP
ENSMUSG00000032487.8	Ptgs2	-3.10324	1.4323	-7.80514	3.95999738604772e-06	6.36136945103548e-05	4.52401	NOD2_GMTP-WT_GMTP
ENSMUSG00000028708.16	Mknk1	0.36324	6.9447	7.80385	3.96685134125299e-06	6.36779525017107e-05	3.90988	NOD2_GMTP-WT_GMTP
ENSMUSG00000040219.4	Ttc12	0.680817	3.31596	7.80126	3.98059501191471e-06	6.38526358740855e-05	4.20869	NOD2_GMTP-WT_GMTP
ENSMUSG00000022433.20	Csnk1e	0.445401	5.40378	7.80014	3.98654657169938e-06	6.39021649815577e-05	3.96878	NOD2_GMTP-WT_GMTP
ENSMUSG00000001918.17	Slc1a5	-0.638705	4.85647	-7.7993	3.99102948866161e-06	6.39280983348935e-05	4.00691	NOD2_GMTP-WT_GMTP
ENSMUSG00000037946.11	Fgd3	-0.372861	7.72543	-7.79522	4.01289530837484e-06	6.42322331533484e-05	3.87925	NOD2_GMTP-WT_GMTP
ENSMUSG00000027951.16	Adar	-0.516854	7.02563	-7.78944	4.04407484572423e-06	6.46849046828995e-05	3.88726	NOD2_GMTP-WT_GMTP
ENSMUSG00000115855.1	Gm34643	-2.00926	0.289055	-7.7827	4.08076450731312e-06	6.51373985903215e-05	4.63231	NOD2_GMTP-WT_GMTP
ENSMUSG00000040209.12	Zfp704	0.791083	6.03216	7.78258	4.08141777419589e-06	6.51373985903215e-05	3.91174	NOD2_GMTP-WT_GMTP
ENSMUSG00000050335.17	Lgals3	0.573445	12.0639	7.78229	4.08299871682407e-06	6.51373985903215e-05	3.84726	NOD2_GMTP-WT_GMTP
ENSMUSG00000029722.15	Agfg2	-0.508226	4.92612	-7.78162	4.0866783969261e-06	6.51373985903215e-05	3.97621	NOD2_GMTP-WT_GMTP
ENSMUSG00000091119.2	Ccdc152	1.36867	0.0825154	7.78157	4.08696087601175e-06	6.51373985903215e-05	4.64979	NOD2_GMTP-WT_GMTP
ENSMUSG00000042292.18	Mrtfa	0.4527	7.07142	7.77671	4.11364450018186e-06	6.55158813223111e-05	3.868	NOD2_GMTP-WT_GMTP
ENSMUSG00000040133.2	Gpr176	0.743699	3.695	7.77489	4.12368702886229e-06	6.56289790834553e-05	4.11048	NOD2_GMTP-WT_GMTP
ENSMUSG00000054000.5	Tusc1	0.989451	5.31059	7.76801	4.16192616850128e-06	6.61903482521519e-05	3.92908	NOD2_GMTP-WT_GMTP
ENSMUSG00000040712.16	Camta2	-0.417647	7.11523	-7.76539	4.17657686996042e-06	6.63760396719564e-05	3.85077	NOD2_GMTP-WT_GMTP
ENSMUSG00000057137.9	Tmem140	0.593188	4.53425	7.76469	4.18055346120706e-06	6.63919497365929e-05	3.9882	NOD2_GMTP-WT_GMTP
ENSMUSG00000020100.15	Slc29a3	0.674661	7.72043	7.76167	4.19751970269393e-06	6.66139808863511e-05	3.83173	NOD2_GMTP-WT_GMTP
ENSMUSG00000020017.14	Hal	1.89639	-0.0576448	7.75921	4.21141856151208e-06	6.67870521414492e-05	4.63118	NOD2_GMTP-WT_GMTP
ENSMUSG00000022967.13	Ifnar1	-0.417981	7.29876	-7.75753	4.22091150424647e-06	6.68900556777354e-05	3.835	NOD2_GMTP-WT_GMTP
ENSMUSG00000036943.9	Rab8b	0.511574	9.39799	7.75672	4.22548549038821e-06	6.69150161440966e-05	3.80495	NOD2_GMTP-WT_GMTP
ENSMUSG00000026821.16	Ralgds	-0.905634	5.23627	-7.7506	4.26039321079613e-06	6.74199671719816e-05	3.90902	NOD2_GMTP-WT_GMTP
ENSMUSG00000021024.14	Psma6	-0.429127	6.81418	-7.74813	4.27452977298642e-06	6.75957355241998e-05	3.83464	NOD2_GMTP-WT_GMTP
ENSMUSG00000001909.16	Trmt1	-0.530187	5.13355	-7.74418	4.29729138063223e-06	6.79075513994667e-05	3.90729	NOD2_GMTP-WT_GMTP
ENSMUSG00000026457.14	Adipor1	0.376124	8.26206	7.73873	4.32892956452278e-06	6.83590979286602e-05	3.79002	NOD2_GMTP-WT_GMTP
ENSMUSG00000010097.15	Nxf1	-0.405644	5.9208	-7.73777	4.33454364070928e-06	6.83993438862419e-05	3.853	NOD2_GMTP-WT_GMTP
ENSMUSG00000026065.8	Slc9a4	1.88231	0.269603	7.73504	4.35049507576003e-06	6.86025417847587e-05	4.56944	NOD2_GMTP-WT_GMTP
ENSMUSG00000028803.18	Nipal3	0.501324	5.68698	7.73228	4.36668932172539e-06	6.8809278838742e-05	3.85651	NOD2_GMTP-WT_GMTP
ENSMUSG00000032418.15	Me1	-1.29363	1.18434	-7.72794	4.39226843194031e-06	6.91586082396209e-05	4.4517	NOD2_GMTP-WT_GMTP
ENSMUSG00000022831.14	Hcls1	-0.477069	8.67854	-7.72747	4.39505698399061e-06	6.91586082396209e-05	3.76887	NOD2_GMTP-WT_GMTP
ENSMUSG00000082229.1	Nap1l2	-1.34641	0.554024	-7.72502	4.40958608063346e-06	6.92844279868477e-05	4.52591	NOD2_GMTP-WT_GMTP
ENSMUSG00000029474.7	Rnf34	-0.388489	5.87959	-7.72458	4.41217803026929e-06	6.92844279868477e-05	3.83608	NOD2_GMTP-WT_GMTP
ENSMUSG00000038615.17	Nfe2l1	-0.348614	7.9458	-7.72455	4.41236822342628e-06	6.92844279868477e-05	3.77477	NOD2_GMTP-WT_GMTP
ENSMUSG00000116895.1	Gm3435	1.19695	0.0310566	7.72273	4.42319784191276e-06	6.93399572651722e-05	4.5746	NOD2_GMTP-WT_GMTP
ENSMUSG00000030921.17	Trim30a	-0.575546	7.99856	-7.72263	4.42380782696117e-06	6.93399572651722e-05	3.77113	NOD2_GMTP-WT_GMTP
ENSMUSG00000002985.16	Apoe	0.6413	11.8431	7.72239	4.42522740759222e-06	6.93399572651722e-05	3.76032	NOD2_GMTP-WT_GMTP
ENSMUSG00000037533.20	Rapgef6	0.76225	6.00396	7.72084	4.43444224847117e-06	6.94355858878155e-05	3.82524	NOD2_GMTP-WT_GMTP
ENSMUSG00000058793.14	Cds2	0.495662	7.6787	7.71454	4.4722871252719e-06	6.99790621502047e-05	3.76542	NOD2_GMTP-WT_GMTP
ENSMUSG00000020653.12	Klf11	0.760717	3.08897	7.71317	4.48053302661774e-06	7.00589582501202e-05	4.12325	NOD2_GMTP-WT_GMTP
ENSMUSG00000049866.12	Arl4c	0.369992	7.93973	7.71258	4.48410367834503e-06	7.00656900384543e-05	3.75781	NOD2_GMTP-WT_GMTP
ENSMUSG00000030357.10	Fkbp4	-0.522574	5.62752	-7.71152	4.49049767803934e-06	7.01164973338641e-05	3.83014	NOD2_GMTP-WT_GMTP
ENSMUSG00000052534.15	Pbx1	0.865179	3.35704	7.70559	4.52659347171011e-06	7.06306854085789e-05	4.06677	NOD2_GMTP-WT_GMTP
ENSMUSG00000024833.15	Pola2	-0.474856	4.14616	-7.70449	4.53330125869327e-06	7.06859196262913e-05	3.94734	NOD2_GMTP-WT_GMTP
ENSMUSG00000029311.16	Hsd17b11	0.357784	7.88426	7.69688	4.58014197397092e-06	7.13664161069924e-05	3.73632	NOD2_GMTP-WT_GMTP
ENSMUSG00000069515.6	Lyz1	0.662134	3.05582	7.69122	4.61528655247177e-06	7.18638442744609e-05	4.09783	NOD2_GMTP-WT_GMTP
ENSMUSG00000020889.11	Nr1d1	1.50973	1.98352	7.68914	4.62827257162359e-06	7.2015792113415e-05	4.27864	NOD2_GMTP-WT_GMTP
ENSMUSG00000005124.10	Ccn4	-3.02396	-1.43187	-7.68558	4.65056105033302e-06	7.23121733213105e-05	4.57233	NOD2_GMTP-WT_GMTP
ENSMUSG00000012076.8	Brms1l	-0.615727	3.25236	-7.68348	4.66376061429875e-06	7.24669154504513e-05	4.05296	NOD2_GMTP-WT_GMTP
ENSMUSG00000092274.3	Neat1	-0.750121	8.09318	-7.68022	4.68438486092086e-06	7.27367288808122e-05	3.70901	NOD2_GMTP-WT_GMTP
ENSMUSG00000010751.15	Tnfrsf22	-1.06051	1.85643	-7.67807	4.69800568900993e-06	7.28848042640134e-05	4.28339	NOD2_GMTP-WT_GMTP
ENSMUSG00000004446.12	Bid	-0.446086	5.24184	-7.67769	4.70045414493413e-06	7.28848042640134e-05	3.80477	NOD2_GMTP-WT_GMTP
ENSMUSG00000021768.15	Dusp13	1.24288	0.0416384	7.67226	4.7351328021259e-06	7.33715404262744e-05	4.50513	NOD2_GMTP-WT_GMTP
ENSMUSG00000026480.12	Ncf2	0.345005	8.32336	7.66865	4.75830338500931e-06	7.36794055723198e-05	3.68908	NOD2_GMTP-WT_GMTP
ENSMUSG00000038206.13	Fbxo8	0.432481	4.73027	7.66024	4.81282450655848e-06	7.44719509118164e-05	3.82033	NOD2_GMTP-WT_GMTP
ENSMUSG00000032324.11	Tspan3	-0.442988	5.96335	-7.65616	4.83949397697572e-06	7.48327298047535e-05	3.73459	NOD2_GMTP-WT_GMTP
ENSMUSG00000010307.7	Tmem86a	0.42169	7.3741	7.65253	4.86334242382972e-06	7.51494179383051e-05	3.68325	NOD2_GMTP-WT_GMTP
ENSMUSG00000042406.8	Atf4	-0.478966	6.72205	-7.65169	4.86884888091439e-06	7.51824395016213e-05	3.6997	NOD2_GMTP-WT_GMTP
ENSMUSG00000031444.16	F10	0.686431	6.80719	7.64699	4.90003464836167e-06	7.56116688166625e-05	3.69034	NOD2_GMTP-WT_GMTP
ENSMUSG00000020918.14	Kat2a	-0.437075	5.20053	-7.64196	4.9335548200571e-06	7.60763017967755e-05	3.75651	NOD2_GMTP-WT_GMTP
ENSMUSG00000025026.15	Add3	0.526824	4.63853	7.63312	4.99311552704279e-06	7.69415654384709e-05	3.79023	NOD2_GMTP-WT_GMTP
ENSMUSG00000026942.13	Traf2	-0.549478	4.76609	-7.63041	5.01154094596612e-06	7.71721967752534e-05	3.77419	NOD2_GMTP-WT_GMTP
ENSMUSG00000068246.6	Apol9b	-1.39026	0.992464	-7.62763	5.03047197128209e-06	7.74102904104947e-05	4.33784	NOD2_GMTP-WT_GMTP
ENSMUSG00000030522.14	Mtmr10	0.418869	5.53468	7.62631	5.0395407598883e-06	7.74963976398261e-05	3.7134	NOD2_GMTP-WT_GMTP
ENSMUSG00000032915.6	Adgre4	1.14286	2.39648	7.62206	5.06872784980905e-06	7.78698034027788e-05	4.11507	NOD2_GMTP-WT_GMTP
ENSMUSG00000036054.15	Sugp2	-0.557651	3.9251	-7.62176	5.07080286578396e-06	7.78698034027788e-05	3.85888	NOD2_GMTP-WT_GMTP
ENSMUSG00000041164.15	Zmiz2	-0.429246	7.14723	-7.6194	5.08706514931912e-06	7.80547902112372e-05	3.64124	NOD2_GMTP-WT_GMTP
ENSMUSG00000041671.13	Pyroxd1	0.630956	2.5933	7.61885	5.09084130209792e-06	7.80547902112372e-05	4.0762	NOD2_GMTP-WT_GMTP
ENSMUSG00000051177.16	Plcb1	2.60065	-1.24427	7.61849	5.09334354625382e-06	7.80547902112372e-05	4.48863	NOD2_GMTP-WT_GMTP
ENSMUSG00000030990.18	Pgap2	-0.40739	5.90203	-7.61512	5.11675640943989e-06	7.83597705997477e-05	3.67839	NOD2_GMTP-WT_GMTP
ENSMUSG00000020668.10	Kif3c	-0.532273	4.92707	-7.61387	5.12543250641068e-06	7.84388035086019e-05	3.73689	NOD2_GMTP-WT_GMTP
ENSMUSG00000038633.5	Degs1	0.407749	8.12595	7.61313	5.13065251691244e-06	7.84648729334252e-05	3.6122	NOD2_GMTP-WT_GMTP
ENSMUSG00000037849.8	Ifi206	-0.929523	5.33675	-7.61174	5.14036661150356e-06	7.85595891797802e-05	3.70429	NOD2_GMTP-WT_GMTP
ENSMUSG00000089669.7	Tnfsf13	0.863498	2.3807	7.60503	5.18746984311997e-06	7.92061027091479e-05	4.09362	NOD2_GMTP-WT_GMTP
ENSMUSG00000022951.16	Rcan1	-0.404284	4.86979	-7.60471	5.18976928968647e-06	7.92061027091479e-05	3.72841	NOD2_GMTP-WT_GMTP
ENSMUSG00000031266.7	Gla	0.332061	8.46194	7.60388	5.1956169661549e-06	7.92411492589298e-05	3.59421	NOD2_GMTP-WT_GMTP
ENSMUSG00000074813.14	Morrbid	-2.54969	-0.224159	-7.60318	5.20055273442737e-06	7.92622494284685e-05	4.43249	NOD2_GMTP-WT_GMTP
ENSMUSG00000047798.15	Cd300lf	-0.575902	3.51393	-7.60267	5.20418954465185e-06	7.92635367302504e-05	3.89392	NOD2_GMTP-WT_GMTP
ENSMUSG00000078517.12	Emc1	0.588577	5.52246	7.60179	5.21045212722707e-06	7.93047873907351e-05	3.67883	NOD2_GMTP-WT_GMTP
ENSMUSG00000034028.16	Cd226	5.25858	-3.88187	7.59869	5.23246416585943e-06	7.95855302882218e-05	4.03264	NOD2_GMTP-WT_GMTP
ENSMUSG00000028959.14	Fastk	-0.441851	4.9061	-7.59343	5.27012342136747e-06	8.01037220033872e-05	3.70921	NOD2_GMTP-WT_GMTP
ENSMUSG00000033581.17	Igf2bp2	-0.548821	5.6081	-7.59281	5.27456578160229e-06	8.01166686758965e-05	3.6611	NOD2_GMTP-WT_GMTP
ENSMUSG00000073889.10	Il11ra1	0.626675	6.4004	7.59184	5.28154108780338e-06	8.01680450967054e-05	3.62452	NOD2_GMTP-WT_GMTP
ENSMUSG00000033545.14	Znrf1	-0.421288	5.74441	-7.59044	5.29159075843248e-06	8.02659854472494e-05	3.65057	NOD2_GMTP-WT_GMTP
ENSMUSG00000034226.7	Rhov	0.598405	5.19018	7.58269	5.34783870023145e-06	8.10640794281687e-05	3.67207	NOD2_GMTP-WT_GMTP
ENSMUSG00000085396.7	Firre	-0.654004	3.51296	-7.58054	5.3635601907757e-06	8.12471952048731e-05	3.86234	NOD2_GMTP-WT_GMTP
ENSMUSG00000019487.11	Trip10	-0.472483	5.13473	-7.57852	5.3783682085332e-06	8.14162346248313e-05	3.6701	NOD2_GMTP-WT_GMTP
ENSMUSG00000014786.8	Slc9a5	-1.56783	0.555623	-7.57393	5.41213135982733e-06	8.183012505836e-05	4.31711	NOD2_GMTP-WT_GMTP
ENSMUSG00000044716.12	Dok7	1.59811	-0.049729	7.57381	5.41304461910722e-06	8.183012505836e-05	4.37848	NOD2_GMTP-WT_GMTP
ENSMUSG00000020130.9	Tbc1d15	0.403437	6.54933	7.57316	5.41783475299951e-06	8.18470865563155e-05	3.59229	NOD2_GMTP-WT_GMTP
ENSMUSG00000063888.7	Rpl7l1	-0.347855	6.89552	-7.56978	5.44293062439825e-06	8.21705757930975e-05	3.5766	NOD2_GMTP-WT_GMTP
ENSMUSG00000018428.15	Akap1	-0.434973	3.93393	-7.56853	5.45218218010847e-06	8.22545916056527e-05	3.78124	NOD2_GMTP-WT_GMTP
ENSMUSG00000025612.5	Bach1	0.538447	7.83699	7.56674	5.46551496414489e-06	8.24000239155168e-05	3.55012	NOD2_GMTP-WT_GMTP
ENSMUSG00000028613.15	Lrp8	-2.03196	0.923945	-7.56105	5.50817249676549e-06	8.29870715194654e-05	4.25364	NOD2_GMTP-WT_GMTP
ENSMUSG00000058486.11	Wdr91	0.361803	7.67762	7.55939	5.52069128472761e-06	8.31195577841614e-05	3.54257	NOD2_GMTP-WT_GMTP
ENSMUSG00000047591.5	Mafa	1.43333	0.0686562	7.55752	5.53482963837596e-06	8.32405282767744e-05	4.34551	NOD2_GMTP-WT_GMTP
ENSMUSG00000073155.12	1810058I24Rik	0.484928	6.02907	7.55734	5.53618715379972e-06	8.32405282767744e-05	3.58948	NOD2_GMTP-WT_GMTP
ENSMUSG00000104835.4	Gm5547	0.738764	2.73618	7.55335	5.56647035603955e-06	8.36394970062697e-05	3.95773	NOD2_GMTP-WT_GMTP
ENSMUSG00000022503.10	Nubp1	-0.601458	4.01487	-7.55202	5.57664267805053e-06	8.37359542902702e-05	3.7466	NOD2_GMTP-WT_GMTP
ENSMUSG00000030342.8	Cd9	0.505749	8.26797	7.55124	5.5826016700002e-06	8.37690592217313e-05	3.52074	NOD2_GMTP-WT_GMTP
ENSMUSG00000041895.15	Wipi1	0.569816	3.98599	7.54661	5.61808076420492e-06	8.42447823196937e-05	3.74268	NOD2_GMTP-WT_GMTP
ENSMUSG00000045362.8	Tnfrsf26	0.565619	4.24978	7.54549	5.62666284584506e-06	8.43168086496581e-05	3.70693	NOD2_GMTP-WT_GMTP
ENSMUSG00000007029.16	Vars	-0.542067	5.66317	-7.54141	5.65821397126009e-06	8.47327035843801e-05	3.58382	NOD2_GMTP-WT_GMTP
ENSMUSG00000110388.1	Gm30329	0.949468	2.76858	7.53733	5.68984212474127e-06	8.51491933798471e-05	3.92904	NOD2_GMTP-WT_GMTP
ENSMUSG00000003528.15	Slc25a1	-0.429822	6.1144	-7.5368	5.69398147683737e-06	8.5154027273909e-05	3.55604	NOD2_GMTP-WT_GMTP
ENSMUSG00000029063.16	Nadk	-0.346284	8.45819	-7.5353	5.70573014173374e-06	8.52725764584762e-05	3.49515	NOD2_GMTP-WT_GMTP
ENSMUSG00000034593.16	Myo5a	0.780847	8.863	7.53476	5.70994878706821e-06	8.52785055460863e-05	3.49004	NOD2_GMTP-WT_GMTP
ENSMUSG00000020189.15	Osbpl8	0.631584	9.5587	7.53408	5.7152723410191e-06	8.53009175552905e-05	3.48449	NOD2_GMTP-WT_GMTP
ENSMUSG00000059791.14	Nrm	-0.680109	2.4664	-7.53322	5.72197375152417e-06	8.53438504797853e-05	3.97639	NOD2_GMTP-WT_GMTP
ENSMUSG00000034575.13	Tent4a	-0.56282	5.14306	-7.53177	5.73340012887946e-06	8.54571523551686e-05	3.60197	NOD2_GMTP-WT_GMTP
ENSMUSG00000024516.13	Sec11c	0.403833	5.91068	7.531	5.73941199042991e-06	8.54896526985731e-05	3.5566	NOD2_GMTP-WT_GMTP
ENSMUSG00000038648.5	Creb3l2	0.66559	4.10544	7.52803	5.76282074449216e-06	8.57810668924974e-05	3.69974	NOD2_GMTP-WT_GMTP
ENSMUSG00000029772.17	Ahcyl2	0.401633	6.68271	7.5234	5.79951191846798e-06	8.62696729578507e-05	3.51595	NOD2_GMTP-WT_GMTP
ENSMUSG00000014601.13	Strip1	-0.519869	4.76815	-7.52103	5.81839803659321e-06	8.64929482948063e-05	3.61637	NOD2_GMTP-WT_GMTP
ENSMUSG00000087477.1	Gm13822	-1.92037	-1.67849	-7.51999	5.8267298745344e-06	8.65591369443981e-05	4.34841	NOD2_GMTP-WT_GMTP
ENSMUSG00000034908.16	Sidt2	0.414912	7.18308	7.5176	5.84585279446595e-06	8.67854380591608e-05	3.49321	NOD2_GMTP-WT_GMTP
ENSMUSG00000028788.14	Ptp4a2	0.346542	8.77034	7.51615	5.85749454885599e-06	8.69004493807339e-05	3.46392	NOD2_GMTP-WT_GMTP
ENSMUSG00000049482.16	Ctu2	-0.571474	3.31412	-7.51423	5.87296709645818e-06	8.70721028726055e-05	3.80028	NOD2_GMTP-WT_GMTP
ENSMUSG00000022265.7	Ank	0.432367	6.07001	7.5112	5.89739705491155e-06	8.73762420227367e-05	3.52084	NOD2_GMTP-WT_GMTP
ENSMUSG00000105769.1	Gm43351	-0.673003	2.65018	-7.50657	5.93506867341165e-06	8.7876036701947e-05	3.90569	NOD2_GMTP-WT_GMTP
ENSMUSG00000047592.17	Nxpe5	-0.623436	4.9939	-7.50595	5.94005604926991e-06	8.78915587714586e-05	3.5756	NOD2_GMTP-WT_GMTP
ENSMUSG00000046671.18	Mtfr1l	-0.397937	6.10973	-7.5041	5.95516266119139e-06	8.80566895024277e-05	3.50881	NOD2_GMTP-WT_GMTP
ENSMUSG00000030614.8	Tmem126b	0.371983	5.2781	7.50245	5.9687047037403e-06	8.8198482155336e-05	3.5501	NOD2_GMTP-WT_GMTP
ENSMUSG00000061126.5	Cyp4f39	1.28263	1.21396	7.49967	5.99155777967274e-06	8.8452845941136e-05	4.12785	NOD2_GMTP-WT_GMTP
ENSMUSG00000004837.2	Grap	0.971275	2.47323	7.49939	5.99384677376407e-06	8.8452845941136e-05	3.9267	NOD2_GMTP-WT_GMTP
ENSMUSG00000029071.16	Dvl1	-0.429701	4.87219	-7.49889	5.99799675831836e-06	8.84555860332832e-05	3.57537	NOD2_GMTP-WT_GMTP
ENSMUSG00000055866.9	Per2	1.44155	1.76502	7.49556	6.02552087559312e-06	8.88028053481567e-05	4.03939	NOD2_GMTP-WT_GMTP
ENSMUSG00000034329.16	Brip1	-0.82411	2.68763	-7.49215	6.05377931327268e-06	8.91603813973949e-05	3.87843	NOD2_GMTP-WT_GMTP
ENSMUSG00000022912.8	Pros1	0.34325	6.18318	7.48736	6.09377741139275e-06	8.96902739976296e-05	3.48156	NOD2_GMTP-WT_GMTP
ENSMUSG00000026222.16	Sp100	-0.393292	7.81796	-7.48456	6.11730596480384e-06	8.99772234625366e-05	3.43128	NOD2_GMTP-WT_GMTP
ENSMUSG00000042826.13	Fgf11	-0.850993	2.75958	-7.48392	6.12271000329749e-06	8.99973835991943e-05	3.85386	NOD2_GMTP-WT_GMTP
ENSMUSG00000079363.7	Gbp4	-1.35557	2.50866	-7.48205	6.13846623010882e-06	9.01376425193558e-05	3.89557	NOD2_GMTP-WT_GMTP
ENSMUSG00000064080.12	Fbln2	-2.48578	-0.508026	-7.48152	6.14298056964861e-06	9.01376425193558e-05	4.28541	NOD2_GMTP-WT_GMTP
ENSMUSG00000032035.16	Ets1	0.813208	3.67773	7.48136	6.14437118594273e-06	9.01376425193558e-05	3.69338	NOD2_GMTP-WT_GMTP
ENSMUSG00000026356.15	Dars	-0.347184	6.36436	-7.48076	6.14942365384535e-06	9.01524901368274e-05	3.46492	NOD2_GMTP-WT_GMTP
ENSMUSG00000066456.14	Hmgn3	-0.901456	2.56068	-7.47121	6.23077333976968e-06	9.12851251019572e-05	3.87074	NOD2_GMTP-WT_GMTP
ENSMUSG00000042492.12	Tbc1d10b	-0.4223	7.24316	-7.46583	6.27720735842207e-06	9.19050707273436e-05	3.41643	NOD2_GMTP-WT_GMTP
ENSMUSG00000027506.15	Tpd52	0.306841	8.82534	7.46272	6.3041707034445e-06	9.22393186268572e-05	3.38564	NOD2_GMTP-WT_GMTP
ENSMUSG00000027580.17	Helz2	-0.899251	7.33188	-7.45924	6.33442428620644e-06	9.26212379411037e-05	3.40468	NOD2_GMTP-WT_GMTP
ENSMUSG00000069607.4	Cd300ld3	0.914799	4.58111	7.45668	6.35691010585179e-06	9.28891520575449e-05	3.54084	NOD2_GMTP-WT_GMTP
ENSMUSG00000020397.15	Med7	-0.440541	3.72959	-7.45358	6.38413980574885e-06	9.3225989192195e-05	3.6451	NOD2_GMTP-WT_GMTP
ENSMUSG00000043885.14	Slc36a4	0.588522	6.70761	7.45294	6.38974301873419e-06	9.32467861196965e-05	3.41265	NOD2_GMTP-WT_GMTP
ENSMUSG00000052040.10	Klf13	0.404778	7.62003	7.45206	6.3975460498312e-06	9.32996372613618e-05	3.38775	NOD2_GMTP-WT_GMTP
ENSMUSG00000043263.13	Ifi209	-0.689136	7.65708	-7.4496	6.41929555778041e-06	9.35183535703652e-05	3.38343	NOD2_GMTP-WT_GMTP
ENSMUSG00000021285.15	Ppp1r13b	-0.484773	4.61996	-7.44941	6.42092581319408e-06	9.35183535703652e-05	3.52653	NOD2_GMTP-WT_GMTP
ENSMUSG00000020120.15	Plek	-0.424818	8.81514	-7.44408	6.46836243112163e-06	9.41477957766581e-05	3.35853	NOD2_GMTP-WT_GMTP
ENSMUSG00000111394.1	Gm49759	-0.875255	3.29438	-7.44205	6.48650205270252e-06	9.43502739908419e-05	3.69918	NOD2_GMTP-WT_GMTP
ENSMUSG00000037921.15	Ddx60	-0.796507	5.69234	-7.43965	6.50808357369889e-06	9.46025203778132e-05	3.43443	NOD2_GMTP-WT_GMTP
ENSMUSG00000024498.16	Tcerg1	-0.548398	5.2785	-7.43793	6.52357224158857e-06	9.4690557759526e-05	3.45617	NOD2_GMTP-WT_GMTP
ENSMUSG00000001089.14	Luzp1	-0.670052	5.56818	-7.43749	6.52756370608489e-06	9.4690557759526e-05	3.4381	NOD2_GMTP-WT_GMTP
ENSMUSG00000048163.13	Selplg	0.474691	8.27646	7.4371	6.53107697975136e-06	9.4690557759526e-05	3.35459	NOD2_GMTP-WT_GMTP
ENSMUSG00000032413.12	Rasa2	-0.764705	3.50026	-7.43709	6.53111497297139e-06	9.4690557759526e-05	3.6572	NOD2_GMTP-WT_GMTP
ENSMUSG00000035473.10	Galm	0.463742	5.01294	7.43628	6.53841927299949e-06	9.47349021028815e-05	3.47272	NOD2_GMTP-WT_GMTP
ENSMUSG00000026811.18	St6galnac6	0.514754	5.75489	7.43429	6.55649393557177e-06	9.4935138990534e-05	3.42351	NOD2_GMTP-WT_GMTP
ENSMUSG00000041459.15	Tardbp	-0.391339	6.47057	-7.43094	6.58688477798001e-06	9.53133333664513e-05	3.38846	NOD2_GMTP-WT_GMTP
ENSMUSG00000003644.17	Rps6ka1	-0.333438	7.33594	-7.4287	6.60730102388314e-06	9.55467969837358e-05	3.35998	NOD2_GMTP-WT_GMTP
ENSMUSG00000020883.18	Fbxl20	0.547027	6.30475	7.41896	6.69698403128573e-06	9.67455334866522e-05	3.37694	NOD2_GMTP-WT_GMTP
ENSMUSG00000071847.13	Apcdd1	1.71866	-0.326039	7.41875	6.69886833849673e-06	9.67455334866522e-05	4.187	NOD2_GMTP-WT_GMTP
ENSMUSG00000001416.13	Cct3	-0.434734	6.47454	-7.41811	6.70481532381459e-06	9.67605657657002e-05	3.36956	NOD2_GMTP-WT_GMTP
ENSMUSG00000029426.8	Scarb2	0.309759	7.86646	7.41771	6.70858222738037e-06	9.67605657657002e-05	3.33279	NOD2_GMTP-WT_GMTP
ENSMUSG00000002365.10	Snx9	0.335448	7.11153	7.41285	6.75383763159444e-06	9.73503740786607e-05	3.34241	NOD2_GMTP-WT_GMTP
ENSMUSG00000026822.14	Lcn2	-1.72962	-0.419978	-7.41157	6.76583420433019e-06	9.74603347974303e-05	4.18373	NOD2_GMTP-WT_GMTP
ENSMUSG00000073700.3	Klhl21	0.590859	4.8112	7.41055	6.77536062519271e-06	9.74995828311954e-05	3.45171	NOD2_GMTP-WT_GMTP
ENSMUSG00000009614.16	Sardh	1.60739	0.525997	7.41035	6.77729812087949e-06	9.74995828311954e-05	4.09137	NOD2_GMTP-WT_GMTP
ENSMUSG00000004105.8	Angptl2	0.479016	5.92625	7.40324	6.8444105616197e-06	9.84016319983379e-05	3.3698	NOD2_GMTP-WT_GMTP
ENSMUSG00000028261.13	Ndufaf4	-0.534557	2.9686	-7.4013	6.86280667704871e-06	9.86025791274874e-05	3.69721	NOD2_GMTP-WT_GMTP
ENSMUSG00000036718.17	Micall2	-0.607842	4.12807	-7.39894	6.88527371136331e-06	9.8861719640701e-05	3.50909	NOD2_GMTP-WT_GMTP
ENSMUSG00000028894.18	Inpp5b	-0.491512	5.503	-7.39408	6.93185017621861e-06	9.94664778019073e-05	3.37827	NOD2_GMTP-WT_GMTP
ENSMUSG00000027890.17	Gstm4	0.742286	3.37214	7.39074	6.96409474085755e-06	9.98649395583254e-05	3.61144	NOD2_GMTP-WT_GMTP
ENSMUSG00000047098.18	Rnf31	-0.459291	6.02215	-7.38621	7.00792869553303e-06	0.000100428	3.34059	NOD2_GMTP-WT_GMTP
ENSMUSG00000046768.13	Rhoj	0.719425	3.6236	7.38576	7.01238479863666e-06	0.000100428	3.56296	NOD2_GMTP-WT_GMTP
ENSMUSG00000031565.18	Fgfr1	0.876165	3.01393	7.38144	7.05448250293209e-06	0.000100917	3.66019	NOD2_GMTP-WT_GMTP
ENSMUSG00000030054.4	Gp9	5.31626	-5.69276	7.38088	7.06001472350811e-06	0.000100917	3.27746	NOD2_GMTP-WT_GMTP
ENSMUSG00000039109.16	F13a1	2.03482	-0.461853	7.38088	7.06004269993279e-06	0.000100917	4.14417	NOD2_GMTP-WT_GMTP
ENSMUSG00000043091.9	Tuba1c	-0.46228	6.12792	-7.37447	7.12314745003436e-06	0.00010163	3.31877	NOD2_GMTP-WT_GMTP
ENSMUSG00000026494.12	Kif26b	1.8889	0.652672	7.37408	7.12700334074262e-06	0.00010163	4.02451	NOD2_GMTP-WT_GMTP
ENSMUSG00000020869.8	Lrrc59	-0.401194	7.28635	-7.37398	7.12797207511301e-06	0.00010163	3.28096	NOD2_GMTP-WT_GMTP
ENSMUSG00000030772.6	Dkk3	-1.47733	0.197315	-7.37397	7.12815584903062e-06	0.00010163	4.07708	NOD2_GMTP-WT_GMTP
ENSMUSG00000061024.8	Rrs1	-0.554514	4.48096	-7.37131	7.15456040244369e-06	0.000101941	3.42698	NOD2_GMTP-WT_GMTP
ENSMUSG00000058099.16	Nfam1	0.360983	8.8453	7.37063	7.16125637025309e-06	0.000101971	3.25059	NOD2_GMTP-WT_GMTP
ENSMUSG00000026425.15	Srgap2	-0.521707	7.66539	-7.36723	7.19523794694838e-06	0.00010239	3.26257	NOD2_GMTP-WT_GMTP
ENSMUSG00000057219.11	Armc7	-0.394704	5.41854	-7.36381	7.22950412010615e-06	0.000102812	3.33882	NOD2_GMTP-WT_GMTP
ENSMUSG00000075273.4	Ttc30b	0.704452	2.67759	7.36211	7.24658146823652e-06	0.000102959	3.69199	NOD2_GMTP-WT_GMTP
ENSMUSG00000017861.11	Mybl2	-1.48004	1.22577	-7.36187	7.24906496682782e-06	0.000102959	3.92979	NOD2_GMTP-WT_GMTP
ENSMUSG00000086150.1	Bach2os	1.32912	0.200364	7.35553	7.31329774723157e-06	0.000103805	4.05079	NOD2_GMTP-WT_GMTP
ENSMUSG00000040747.9	Cd53	0.43989	8.90988	7.35226	7.34664548608825e-06	0.000104212	3.22295	NOD2_GMTP-WT_GMTP
ENSMUSG00000087187.1	Gm13431	2.29181	-2.38926	7.34914	7.37866424790512e-06	0.0001046	4.07308	NOD2_GMTP-WT_GMTP
ENSMUSG00000031938.15	4931406C07Rik	0.453598	5.64265	7.3463	7.40790651420318e-06	0.000104948	3.30023	NOD2_GMTP-WT_GMTP
ENSMUSG00000019990.15	Pde7b	0.533544	5.36155	7.34386	7.43308120223393e-06	0.00010519	3.31309	NOD2_GMTP-WT_GMTP
ENSMUSG00000027952.16	Pmvk	-0.657763	3.81908	-7.3436	7.43583910077058e-06	0.00010519	3.47137	NOD2_GMTP-WT_GMTP
ENSMUSG00000074749.10	Kiz	0.538095	3.71685	7.34316	7.44032251598347e-06	0.00010519	3.48584	NOD2_GMTP-WT_GMTP
ENSMUSG00000066357.6	Wdr6	-0.468251	4.28983	-7.34283	7.44383428542556e-06	0.00010519	3.40693	NOD2_GMTP-WT_GMTP
ENSMUSG00000044229.9	Nxpe4	0.766018	2.39098	7.33438	7.53196869804237e-06	0.000106368	3.7025	NOD2_GMTP-WT_GMTP
ENSMUSG00000117234.1	Gm7818	-1.94706	-0.502652	-7.33261	7.55062377834037e-06	0.000106564	4.08002	NOD2_GMTP-WT_GMTP
ENSMUSG00000044813.15	Shb	-0.683349	2.91631	-7.33172	7.56000546952891e-06	0.000106629	3.60508	NOD2_GMTP-WT_GMTP
ENSMUSG00000029291.11	Rufy3	0.32767	6.94282	7.32977	7.58056881091881e-06	0.000106851	3.22489	NOD2_GMTP-WT_GMTP
ENSMUSG00000033102.15	Cdc14b	0.705535	3.82926	7.32799	7.59936799054792e-06	0.000107048	3.44695	NOD2_GMTP-WT_GMTP
ENSMUSG00000041777.12	Cir1	0.629257	4.18401	7.3262	7.61844433510638e-06	0.000107249	3.39541	NOD2_GMTP-WT_GMTP
ENSMUSG00000001082.12	Mfsd10	-0.508202	4.83146	-7.32357	7.64639524906709e-06	0.000107574	3.3224	NOD2_GMTP-WT_GMTP
ENSMUSG00000030657.11	Xylt1	0.926624	6.70578	7.32313	7.6511230855816e-06	0.000107574	3.22224	NOD2_GMTP-WT_GMTP
ENSMUSG00000021213.12	Akr1c13	0.380279	4.81613	7.32144	7.66921046310054e-06	0.00010776	3.32051	NOD2_GMTP-WT_GMTP
ENSMUSG00000039530.17	Tusc3	0.567159	5.0896	7.32042	7.6801365635422e-06	0.000107846	3.29715	NOD2_GMTP-WT_GMTP
ENSMUSG00000028107.14	Tars2	-0.466923	4.17177	-7.31176	7.77357327049849e-06	0.000109089	3.37565	NOD2_GMTP-WT_GMTP
ENSMUSG00000027010.16	Slc25a12	-0.425382	5.57434	-7.31065	7.7857178102906e-06	0.00010918	3.25154	NOD2_GMTP-WT_GMTP
ENSMUSG00000021592.18	Arsk	0.553137	4.70263	7.31027	7.78981699310905e-06	0.00010918	3.31469	NOD2_GMTP-WT_GMTP
ENSMUSG00000040111.17	Gramd1b	0.477882	6.40244	7.30711	7.82433660709859e-06	0.000109595	3.20892	NOD2_GMTP-WT_GMTP
ENSMUSG00000004098.7	Col5a3	-3.19978	-0.534891	-7.30511	7.84615908131512e-06	0.000109831	4.04394	NOD2_GMTP-WT_GMTP
ENSMUSG00000030835.6	Nomo1	-0.49252	5.70805	-7.30128	7.88838138296726e-06	0.000110353	3.23043	NOD2_GMTP-WT_GMTP
ENSMUSG00000032290.7	Ptpn9	-0.379065	5.08669	-7.30076	7.89404278672871e-06	0.000110363	3.26836	NOD2_GMTP-WT_GMTP
ENSMUSG00000022391.16	Rangap1	-0.407726	6.13632	-7.30004	7.90206951076641e-06	0.000110406	3.20877	NOD2_GMTP-WT_GMTP
ENSMUSG00000014543.14	Klra17	1.91436	-0.0181211	7.29922	7.9111537938167e-06	0.000110464	3.99362	NOD2_GMTP-WT_GMTP
ENSMUSG00000111171.1	Gm47815	1.39137	0.745704	7.2934	7.97573914246851e-06	0.000111296	3.89761	NOD2_GMTP-WT_GMTP
ENSMUSG00000034118.15	Tpst1	-0.479308	5.17751	-7.29025	8.01098709357816e-06	0.000111718	3.24618	NOD2_GMTP-WT_GMTP
ENSMUSG00000026832.12	Cytip	0.626587	4.85451	7.28951	8.01933719772519e-06	0.000111765	3.27024	NOD2_GMTP-WT_GMTP
ENSMUSG00000023191.9	P3h3	-0.831876	3.76331	-7.28351	8.087006187045e-06	0.000112638	3.39126	NOD2_GMTP-WT_GMTP
ENSMUSG00000031383.8	Dusp9	0.905756	2.09465	7.28246	8.0989416020604e-06	0.00011272	3.67802	NOD2_GMTP-WT_GMTP
ENSMUSG00000037606.18	Osbpl5	1.10091	2.11607	7.28195	8.10474336209749e-06	0.00011272	3.67362	NOD2_GMTP-WT_GMTP
ENSMUSG00000074505.6	Fat3	1.79702	3.51202	7.28165	8.10808957550238e-06	0.00011272	3.4279	NOD2_GMTP-WT_GMTP
ENSMUSG00000004552.16	Ctse	0.863467	2.18832	7.26824	8.26200340270801e-06	0.000114788	3.64114	NOD2_GMTP-WT_GMTP
ENSMUSG00000055413.12	H2-Q5	-1.11617	3.32587	-7.26195	8.33524277987081e-06	0.000115734	3.43044	NOD2_GMTP-WT_GMTP
ENSMUSG00000036992.10	Nxt1	-0.539538	3.4021	-7.25886	8.37149585311655e-06	0.000116165	3.4129	NOD2_GMTP-WT_GMTP
ENSMUSG00000020256.14	Aldh1l2	-1.92154	-2.10746	-7.25636	8.40088902474808e-06	0.0001165	3.97921	NOD2_GMTP-WT_GMTP
ENSMUSG00000073492.2	Gm10521	0.902258	4.47773	7.25263	8.44500575547175e-06	0.000116984	3.25244	NOD2_GMTP-WT_GMTP
ENSMUSG00000028082.14	Sh3d19	0.699672	3.51782	7.25253	8.44624437057772e-06	0.000116984	3.38403	NOD2_GMTP-WT_GMTP
ENSMUSG00000031924.4	Cyb5b	-0.52762	6.92085	-7.24947	8.4826365253501e-06	0.000117415	3.10668	NOD2_GMTP-WT_GMTP
ENSMUSG00000039899.5	Fgl2	-0.473036	7.64351	-7.24714	8.5103991955821e-06	0.000117726	3.08549	NOD2_GMTP-WT_GMTP
ENSMUSG00000056145.5	AI504432	-1.10252	1.83697	-7.24514	8.53435059444068e-06	0.000117984	3.6665	NOD2_GMTP-WT_GMTP
ENSMUSG00000068036.16	Afdn	-0.481	6.10318	-7.24244	8.5668682867482e-06	0.000118361	3.12476	NOD2_GMTP-WT_GMTP
ENSMUSG00000036894.3	Rap2b	-0.434401	6.64153	-7.23931	8.60467323605285e-06	0.000118809	3.10019	NOD2_GMTP-WT_GMTP
ENSMUSG00000035376.10	Hacd2	-0.645373	3.94236	-7.23762	8.62515175666939e-06	0.000119019	3.29694	NOD2_GMTP-WT_GMTP
ENSMUSG00000078813.3	Leng1	-0.495137	3.63656	-7.23672	8.63604795021236e-06	0.000119062	3.34179	NOD2_GMTP-WT_GMTP
ENSMUSG00000036256.13	Igfbp7	-1.1216	1.7127	-7.23648	8.63896324664586e-06	0.000119062	3.67395	NOD2_GMTP-WT_GMTP
ENSMUSG00000001440.5	Kpnb1	-0.366395	7.6023	-7.23549	8.65103356996697e-06	0.000119155	3.06902	NOD2_GMTP-WT_GMTP
ENSMUSG00000033386.10	Frrs1	0.396788	6.86549	7.23138	8.70121771595352e-06	0.000119772	3.08143	NOD2_GMTP-WT_GMTP
ENSMUSG00000050103.18	Agmo	0.992187	1.22031	7.22984	8.7200429762259e-06	0.000119957	3.74008	NOD2_GMTP-WT_GMTP
ENSMUSG00000044629.5	Cnrip1	0.854403	3.29251	7.22842	8.73744795118884e-06	0.000120122	3.38657	NOD2_GMTP-WT_GMTP
ENSMUSG00000055760.12	Gemin6	-0.735348	2.20271	-7.22587	8.76894346818738e-06	0.000120481	3.57659	NOD2_GMTP-WT_GMTP
ENSMUSG00000040061.17	Plcb2	-0.416858	5.77091	-7.22335	8.80009096583485e-06	0.000120835	3.11178	NOD2_GMTP-WT_GMTP
ENSMUSG00000046157.13	Tmem229b	0.350439	6.70415	7.22242	8.81165514578468e-06	0.000120919	3.07303	NOD2_GMTP-WT_GMTP
ENSMUSG00000006179.9	Prss16	-1.5815	-0.473546	-7.22084	8.83122622313989e-06	0.000121113	3.92201	NOD2_GMTP-WT_GMTP
ENSMUSG00000040511.14	Pvr	-0.497553	3.70819	-7.21995	8.84236185441241e-06	0.000121191	3.30549	NOD2_GMTP-WT_GMTP
ENSMUSG00000031403.14	Dkc1	-0.568111	3.2775	-7.21894	8.85490254326959e-06	0.000121223	3.37511	NOD2_GMTP-WT_GMTP
ENSMUSG00000053581.13	Zfand2a	0.329082	7.398	7.21862	8.85896106757703e-06	0.000121223	3.0484	NOD2_GMTP-WT_GMTP
ENSMUSG00000092349.1	Smim40	1.11559	0.773064	7.21846	8.86094618460453e-06	0.000121223	3.78622	NOD2_GMTP-WT_GMTP
ENSMUSG00000056216.9	Cebpg	0.34625	6.13639	7.20947	8.9738862561867e-06	0.000122693	3.07437	NOD2_GMTP-WT_GMTP
ENSMUSG00000047412.16	Zbtb44	0.432034	4.895	7.2086	8.98490514324155e-06	0.000122768	3.14692	NOD2_GMTP-WT_GMTP
ENSMUSG00000028874.14	Fgr	-0.499891	4.69052	-7.20553	9.02394724086221e-06	0.000123226	3.1607	NOD2_GMTP-WT_GMTP
ENSMUSG00000031652.11	N4bp1	-0.483685	6.38146	-7.19957	9.10009972498423e-06	0.000124159	3.05006	NOD2_GMTP-WT_GMTP
ENSMUSG00000043445.7	Pgp	-0.590197	4.97116	-7.19932	9.10339055582432e-06	0.000124159	3.12678	NOD2_GMTP-WT_GMTP
ENSMUSG00000007080.14	Pole	-1.08852	2.69327	-7.19628	9.14255709776265e-06	0.000124617	3.44599	NOD2_GMTP-WT_GMTP
ENSMUSG00000037243.17	Zfp692	-0.808933	2.27995	-7.19441	9.16673505948589e-06	0.00012487	3.51699	NOD2_GMTP-WT_GMTP
ENSMUSG00000029699.13	Ssc4d	0.87362	2.87378	7.19293	9.18593520105147e-06	0.000125055	3.40848	NOD2_GMTP-WT_GMTP
ENSMUSG00000051212.8	Gpr183	-0.713671	3.15989	-7.19012	9.22236723014449e-06	0.000125475	3.3533	NOD2_GMTP-WT_GMTP
ENSMUSG00000040997.14	Abhd4	0.354042	6.36213	7.18914	9.23519779584472e-06	0.000125573	3.03519	NOD2_GMTP-WT_GMTP
ENSMUSG00000039960.5	Rhou	1.28573	1.15341	7.18849	9.24361976384138e-06	0.000125611	3.68973	NOD2_GMTP-WT_GMTP
ENSMUSG00000087480.1	Gm15910	1.39802	-0.413081	7.18309	9.31441588425755e-06	0.000126431	3.86431	NOD2_GMTP-WT_GMTP
ENSMUSG00000048878.6	Hexim1	-0.488551	6.22844	-7.18303	9.31532441533369e-06	0.000126431	3.03125	NOD2_GMTP-WT_GMTP
ENSMUSG00000031791.8	Tmem38a	-1.12519	1.55345	-7.17691	9.39618548270506e-06	0.000127451	3.61211	NOD2_GMTP-WT_GMTP
ENSMUSG00000032020.15	Ubash3b	-0.418972	5.94778	-7.16721	9.5260772534174e-06	0.000129134	3.01956	NOD2_GMTP-WT_GMTP
ENSMUSG00000030041.9	M1ap	0.705312	3.14618	7.16445	9.5633806182175e-06	0.000129561	3.31762	NOD2_GMTP-WT_GMTP
ENSMUSG00000070469.12	Adamtsl3	-4.89667	-6.14041	-7.16385	9.57152996990136e-06	0.000129593	2.93196	NOD2_GMTP-WT_GMTP
ENSMUSG00000055531.12	Cpsf6	-0.353567	5.59872	-7.16052	9.61670725303411e-06	0.000130126	3.02711	NOD2_GMTP-WT_GMTP
ENSMUSG00000003363.15	Pld3	0.440335	10.2772	7.15714	9.66290198370843e-06	0.000130672	2.92766	NOD2_GMTP-WT_GMTP
ENSMUSG00000042364.11	Snx18	-0.357927	5.9655	-7.15604	9.67800544171189e-06	0.000130797	3.00206	NOD2_GMTP-WT_GMTP
ENSMUSG00000027187.10	Cat	0.330263	7.97098	7.15028	9.75726342113182e-06	0.000131696	2.93487	NOD2_GMTP-WT_GMTP
ENSMUSG00000022013.4	Dnajc15	0.4503	4.85365	7.15009	9.7598891970859e-06	0.000131696	3.06305	NOD2_GMTP-WT_GMTP
ENSMUSG00000048200.12	Cracr2b	0.6233	3.70193	7.14992	9.76225907580316e-06	0.000131696	3.20235	NOD2_GMTP-WT_GMTP
ENSMUSG00000021947.11	Cryl1	0.426313	4.6336	7.1429	9.85997438432117e-06	0.000132934	3.07273	NOD2_GMTP-WT_GMTP
ENSMUSG00000038213.7	Tapbpl	-0.480422	5.67043	-7.14113	9.88476478947049e-06	0.000133188	2.99405	NOD2_GMTP-WT_GMTP
ENSMUSG00000035150.15	Eif2s3x	-0.521991	6.41678	-7.12669	1.00894316918719e-05	0.00013577	2.93976	NOD2_GMTP-WT_GMTP
ENSMUSG00000022898.13	Vps26c	0.348617	6.62168	7.12639	1.00938468941866e-05	0.00013577	2.93218	NOD2_GMTP-WT_GMTP
ENSMUSG00000037111.9	Setd7	0.575561	6.10988	7.12633	1.00946606278548e-05	0.00013577	2.95113	NOD2_GMTP-WT_GMTP
ENSMUSG00000028683.14	Eif2b3	-0.691341	3.02812	-7.12532	1.01091162726492e-05	0.000135882	3.2803	NOD2_GMTP-WT_GMTP
ENSMUSG00000034120.18	Srsf2	-0.551222	5.82229	-7.12315	1.01403132709141e-05	0.000136159	2.95951	NOD2_GMTP-WT_GMTP
ENSMUSG00000028751.13	Pla2g2e	1.88161	0.0362934	7.12305	1.01418782338409e-05	0.000136159	3.73738	NOD2_GMTP-WT_GMTP
ENSMUSG00000031153.16	Gripap1	0.380405	6.54024	7.11903	1.01999407493141e-05	0.000136856	2.92382	NOD2_GMTP-WT_GMTP
ENSMUSG00000031375.17	Bgn	-0.97399	3.15364	-7.1185	1.02076202517085e-05	0.000136877	3.24789	NOD2_GMTP-WT_GMTP
ENSMUSG00000024781.16	Lipa	0.343908	11.1825	7.11758	1.02209418208161e-05	0.000136973	2.87064	NOD2_GMTP-WT_GMTP
ENSMUSG00000067149.6	Jchain	5.2176	-3.48715	7.11623	1.02406231492004e-05	0.000137154	3.58851	NOD2_GMTP-WT_GMTP
ENSMUSG00000030742.7	Lat	1.31014	1.14544	7.11383	1.027562415316e-05	0.000137506	3.58182	NOD2_GMTP-WT_GMTP
ENSMUSG00000021939.8	Ctsb	0.314192	14.224	7.11356	1.0279537594257e-05	0.000137506	2.89504	NOD2_GMTP-WT_GMTP
ENSMUSG00000054648.8	Zfp869	-0.453278	4.53999	-7.11303	1.02873125902546e-05	0.000137506	3.03752	NOD2_GMTP-WT_GMTP
ENSMUSG00000031520.6	Vegfc	-2.09277	-1.60373	-7.11245	1.02958635555328e-05	0.000137506	3.80787	NOD2_GMTP-WT_GMTP
ENSMUSG00000038279.10	Nop2	-0.511653	4.85043	-7.11232	1.02977323269348e-05	0.000137506	3.00672	NOD2_GMTP-WT_GMTP
ENSMUSG00000007682.6	Dio2	0.753431	7.0129	7.11119	1.03143662745721e-05	0.000137646	2.89746	NOD2_GMTP-WT_GMTP
ENSMUSG00000083282.3	Ctsf	0.615547	3.96846	7.11036	1.03265492956316e-05	0.000137726	3.10384	NOD2_GMTP-WT_GMTP
ENSMUSG00000017119.19	Nbr1	0.336164	7.36372	7.10613	1.03887665311753e-05	0.000138473	2.88088	NOD2_GMTP-WT_GMTP
ENSMUSG00000059486.11	Kbtbd2	0.364515	5.73233	7.10437	1.04148533801417e-05	0.000138738	2.93579	NOD2_GMTP-WT_GMTP
ENSMUSG00000037936.15	Scarb1	-0.333684	6.90094	-7.10387	1.0422378434696e-05	0.000138756	2.88966	NOD2_GMTP-WT_GMTP
ENSMUSG00000001525.10	Tubb5	-0.365493	8.96798	-7.10209	1.04487575572825e-05	0.000139013	2.85001	NOD2_GMTP-WT_GMTP
ENSMUSG00000039501.14	Znfx1	-0.605571	9.3815	-7.10173	1.04541731635468e-05	0.000139013	2.84664	NOD2_GMTP-WT_GMTP
ENSMUSG00000037287.15	Tbcel	0.391618	5.37456	7.09968	1.04847412335004e-05	0.000139337	2.94908	NOD2_GMTP-WT_GMTP
ENSMUSG00000036452.18	Arhgap26	0.526571	3.50577	7.09824	1.0506145584862e-05	0.000139538	3.1565	NOD2_GMTP-WT_GMTP
ENSMUSG00000051510.13	Mafg	-0.419005	6.26614	-7.09476	1.05583755581286e-05	0.000140148	2.89743	NOD2_GMTP-WT_GMTP
ENSMUSG00000042659.15	Arrdc4	0.528141	4.3389	7.08993	1.06313073525237e-05	0.000141032	3.02518	NOD2_GMTP-WT_GMTP
ENSMUSG00000074743.4	Thbd	0.501027	4.36699	7.08745	1.06689410006917e-05	0.000141447	3.01811	NOD2_GMTP-WT_GMTP
ENSMUSG00000001942.8	Siae	0.390991	5.99323	7.08529	1.07018690745556e-05	0.0001418	2.89462	NOD2_GMTP-WT_GMTP
ENSMUSG00000025986.6	Slc39a10	0.529589	6.46798	7.08193	1.07533428694002e-05	0.000142397	2.8706	NOD2_GMTP-WT_GMTP
ENSMUSG00000019558.14	Slc6a8	0.325311	7.86432	7.07399	1.08758467943533e-05	0.000143934	2.82201	NOD2_GMTP-WT_GMTP
ENSMUSG00000023908.8	Pkmyt1	-0.911127	2.10778	-7.07281	1.08942487875209e-05	0.000144092	3.36696	NOD2_GMTP-WT_GMTP
ENSMUSG00000026519.16	Tmem63a	-0.385223	4.95924	-7.07213	1.09047756410079e-05	0.000144146	2.93727	NOD2_GMTP-WT_GMTP
ENSMUSG00000027810.14	Eif2a	0.370656	6.20979	7.06952	1.09454399720845e-05	0.000144598	2.86166	NOD2_GMTP-WT_GMTP
ENSMUSG00000020715.9	Ern1	0.531177	6.22811	7.06093	1.10806423112203e-05	0.000146297	2.84796	NOD2_GMTP-WT_GMTP
ENSMUSG00000072573.2	Gm10369	2.44351	-2.82683	7.05977	1.10989486286086e-05	0.000146452	3.64681	NOD2_GMTP-WT_GMTP
ENSMUSG00000028964.14	Park7	-0.420814	5.84654	-7.05762	1.11332118904306e-05	0.000146818	2.85966	NOD2_GMTP-WT_GMTP
ENSMUSG00000029166.14	Mapre3	0.592985	3.6451	7.05229	1.12182993144595e-05	0.000147852	3.06527	NOD2_GMTP-WT_GMTP
ENSMUSG00000038055.12	Dexi	0.39603	3.5723	7.05097	1.12395590763994e-05	0.000148045	3.07499	NOD2_GMTP-WT_GMTP
ENSMUSG00000021508.11	Cxcl14	0.759224	2.43155	7.05032	1.12499970991038e-05	0.000148095	3.27634	NOD2_GMTP-WT_GMTP
ENSMUSG00000030346.16	Rad51ap1	-0.861986	1.42088	-7.04605	1.13189972818732e-05	0.000148916	3.44027	NOD2_GMTP-WT_GMTP
ENSMUSG00000029068.16	Ccnl2	-0.395085	5.80677	-7.04459	1.13425764509383e-05	0.000149138	2.84198	NOD2_GMTP-WT_GMTP
ENSMUSG00000024862.16	Klc2	-0.491726	4.25453	-7.04267	1.1373738917197e-05	0.00014946	2.9645	NOD2_GMTP-WT_GMTP
ENSMUSG00000013418.8	B4galnt2	0.987153	0.713252	7.04127	1.13965571339251e-05	0.00014959	3.53642	NOD2_GMTP-WT_GMTP
ENSMUSG00000028041.17	Adam15	-0.397952	7.16252	-7.04124	1.13971089620274e-05	0.00014959	2.78799	NOD2_GMTP-WT_GMTP
ENSMUSG00000046876.16	Atxn1	0.62207	4.53504	7.03403	1.15153356415527e-05	0.000151053	2.91918	NOD2_GMTP-WT_GMTP
ENSMUSG00000069072.9	Slc7a14	4.48276	-3.36327	7.02957	1.15892638696665e-05	0.000151934	3.51108	NOD2_GMTP-WT_GMTP
ENSMUSG00000057706.7	Mex3b	1.0421	2.01198	7.02715	1.16294591861113e-05	0.000152371	3.31543	NOD2_GMTP-WT_GMTP
ENSMUSG00000015889.8	Lta4h	0.353137	5.95061	7.02628	1.16440591332275e-05	0.000152473	2.80744	NOD2_GMTP-WT_GMTP
ENSMUSG00000031770.16	Herpud1	0.541067	5.10599	7.02453	1.16731929850621e-05	0.000152765	2.8541	NOD2_GMTP-WT_GMTP
ENSMUSG00000044309.8	Apol7c	-1.92329	0.434988	-7.02209	1.17141707291773e-05	0.000153128	3.54467	NOD2_GMTP-WT_GMTP
ENSMUSG00000038855.10	Itpkb	0.371982	7.48376	7.02206	1.17146926493859e-05	0.000153128	2.75123	NOD2_GMTP-WT_GMTP
ENSMUSG00000002718.14	Cse1l	-0.447532	5.57305	-7.02161	1.17223266058043e-05	0.000153138	2.81955	NOD2_GMTP-WT_GMTP
ENSMUSG00000037278.9	Tmem97	-0.444889	4.5435	-7.01643	1.18096563145351e-05	0.000154189	2.89164	NOD2_GMTP-WT_GMTP
ENSMUSG00000026342.10	Slc35f5	0.336758	6.79022	7.01441	1.18440349127286e-05	0.000154547	2.75786	NOD2_GMTP-WT_GMTP
ENSMUSG00000054619.7	Mettl7a1	0.429562	5.73453	7.0137	1.18560218359488e-05	0.000154613	2.79886	NOD2_GMTP-WT_GMTP
ENSMUSG00000027399.1	Il1a	-1.91035	0.928862	-7.00338	1.203311310679e-05	0.000156831	3.45064	NOD2_GMTP-WT_GMTP
ENSMUSG00000024851.14	Pitpnm1	-0.397993	7.01156	-6.99887	1.21113428570325e-05	0.000157759	2.72784	NOD2_GMTP-WT_GMTP
ENSMUSG00000074578.14	Zfas1	-0.382364	5.90824	-6.99512	1.21767567556375e-05	0.000158518	2.76211	NOD2_GMTP-WT_GMTP
ENSMUSG00000004347.17	Pde1c	2.09943	1.68553	6.99206	1.22304123304159e-05	0.000159124	3.31773	NOD2_GMTP-WT_GMTP
ENSMUSG00000040848.11	Sft2d2	0.374918	7.79954	6.98964	1.22729900147742e-05	0.000159585	2.69553	NOD2_GMTP-WT_GMTP
ENSMUSG00000041736.7	Tspo	-0.531566	7.3121	-6.98803	1.23014858920876e-05	0.000159815	2.7036	NOD2_GMTP-WT_GMTP
ENSMUSG00000047810.9	Ccdc88b	-0.382513	6.68731	-6.98783	1.23050013893682e-05	0.000159815	2.72081	NOD2_GMTP-WT_GMTP
ENSMUSG00000048787.13	Dcun1d3	0.442115	4.09054	6.98478	1.23591492198332e-05	0.000160424	2.89794	NOD2_GMTP-WT_GMTP
ENSMUSG00000025757.13	Hspa4l	0.472283	5.48972	6.98277	1.23948996503676e-05	0.000160795	2.7654	NOD2_GMTP-WT_GMTP
ENSMUSG00000102644.5	Thap6	0.647724	3.16807	6.98157	1.24163099331698e-05	0.000160979	3.0398	NOD2_GMTP-WT_GMTP
ENSMUSG00000042500.11	Ago4	0.512289	5.3402	6.98036	1.24380618699137e-05	0.000161168	2.77097	NOD2_GMTP-WT_GMTP
ENSMUSG00000032307.16	Ube2q2	0.342043	6.2118	6.97978	1.24483499399307e-05	0.000161207	2.72572	NOD2_GMTP-WT_GMTP
ENSMUSG00000052331.14	Ankrd44	0.530198	6.32546	6.9748	1.25379212046125e-05	0.000162273	2.71361	NOD2_GMTP-WT_GMTP
ENSMUSG00000030433.15	Sbk2	1.34403	1.27594	6.97333	1.25646367513454e-05	0.000162524	3.35476	NOD2_GMTP-WT_GMTP
ENSMUSG00000027994.14	Mcub	0.413011	5.70791	6.97183	1.25916929793647e-05	0.00016278	2.73665	NOD2_GMTP-WT_GMTP
ENSMUSG00000033809.15	Alg3	-0.523959	3.50593	-6.96953	1.26334664510132e-05	0.000163226	2.96269	NOD2_GMTP-WT_GMTP
ENSMUSG00000028268.14	Gbp3	-0.568617	6.60301	-6.96902	1.26428621610567e-05	0.000163252	2.69498	NOD2_GMTP-WT_GMTP
ENSMUSG00000086695.1	Gm15247	-1.91904	-1.6131	-6.96857	1.26509958584399e-05	0.000163263	3.61014	NOD2_GMTP-WT_GMTP
ENSMUSG00000024245.4	Tmem178	-0.77541	4.32633	-6.96235	1.27649868553233e-05	0.000164639	2.83403	NOD2_GMTP-WT_GMTP
ENSMUSG00000035314.10	Gdpd5	-0.570673	4.308	-6.96141	1.27822112296482e-05	0.000164766	2.83489	NOD2_GMTP-WT_GMTP
ENSMUSG00000060803.6	Gstp1	0.681927	4.22597	6.96047	1.27997092062342e-05	0.000164896	2.8436	NOD2_GMTP-WT_GMTP
ENSMUSG00000021238.11	Aldh6a1	0.48433	4.2346	6.95945	1.28185182153143e-05	0.000165041	2.84099	NOD2_GMTP-WT_GMTP
ENSMUSG00000034647.15	Ankrd12	0.504377	6.02568	6.95906	1.28257394441393e-05	0.000165041	2.70204	NOD2_GMTP-WT_GMTP
ENSMUSG00000062906.12	Hdac10	-0.580364	3.05058	-6.9586	1.28341377153074e-05	0.000165054	3.02594	NOD2_GMTP-WT_GMTP
ENSMUSG00000038312.10	Edem2	0.451044	6.84845	6.95708	1.28623300449488e-05	0.000165321	2.66903	NOD2_GMTP-WT_GMTP
ENSMUSG00000028180.18	Zranb2	-0.399001	5.4537	-6.95577	1.28866551310738e-05	0.000165538	2.72641	NOD2_GMTP-WT_GMTP
ENSMUSG00000022034.10	Esco2	-1.10367	0.800843	-6.95454	1.29094980056532e-05	0.000165736	3.3966	NOD2_GMTP-WT_GMTP
ENSMUSG00000028914.13	Casp9	0.347559	5.80905	6.9482	1.30281778652104e-05	0.000167164	2.69562	NOD2_GMTP-WT_GMTP
ENSMUSG00000030265.14	Kras	-0.444485	5.28231	-6.9464	1.30620617809901e-05	0.000167502	2.72301	NOD2_GMTP-WT_GMTP
ENSMUSG00000034807.9	Colgalt1	-0.34459	8.35054	-6.94382	1.3110881636693e-05	0.000168032	2.6169	NOD2_GMTP-WT_GMTP
ENSMUSG00000026873.9	Phf19	-0.866586	2.25714	-6.94037	1.31763988692251e-05	0.000168774	3.14255	NOD2_GMTP-WT_GMTP
ENSMUSG00000026630.9	Batf3	0.889484	2.1005	6.9385	1.32120390183676e-05	0.000169134	3.16732	NOD2_GMTP-WT_GMTP
ENSMUSG00000028926.15	Cdk14	-0.597985	6.3541	-6.93785	1.32245125519757e-05	0.000169196	2.65628	NOD2_GMTP-WT_GMTP
ENSMUSG00000102895.1	5830415G21Rik	1.31272	0.726791	6.93559	1.3267727890466e-05	0.000169639	3.37883	NOD2_GMTP-WT_GMTP
ENSMUSG00000044468.14	Tent5c	-0.527402	5.69855	-6.93525	1.32743287139674e-05	0.000169639	2.6814	NOD2_GMTP-WT_GMTP
ENSMUSG00000103009.1	Gm4430	-1.23639	0.766553	-6.93383	1.33015966950542e-05	0.00016989	3.37072	NOD2_GMTP-WT_GMTP
ENSMUSG00000006411.12	Nectin4	-0.39726	5.02544	-6.93307	1.33162119889856e-05	0.00016998	2.72114	NOD2_GMTP-WT_GMTP
ENSMUSG00000020538.15	Srebf1	-0.467657	6.40527	-6.93166	1.33433218586791e-05	0.000170228	2.64499	NOD2_GMTP-WT_GMTP
ENSMUSG00000028587.18	Orc1	-1.27555	-0.191162	-6.93099	1.33561994186651e-05	0.000170295	3.48306	NOD2_GMTP-WT_GMTP
ENSMUSG00000024769.7	Cdc42bpg	-0.723533	3.54643	-6.92961	1.33828351194145e-05	0.000170519	2.89568	NOD2_GMTP-WT_GMTP
ENSMUSG00000037697.19	Ddhd1	0.446771	5.68757	6.9293	1.33889969177923e-05	0.000170519	2.67287	NOD2_GMTP-WT_GMTP
ENSMUSG00000062960.10	Kdr	-0.529495	5.86662	-6.92544	1.34639589417721e-05	0.000171376	2.65801	NOD2_GMTP-WT_GMTP
ENSMUSG00000040857.15	Erf	-0.363814	5.67329	-6.9227	1.35174533508931e-05	0.000171958	2.66353	NOD2_GMTP-WT_GMTP
ENSMUSG00000024104.11	Washc2	0.346399	7.24872	6.9095	1.37781842392903e-05	0.000175175	2.58543	NOD2_GMTP-WT_GMTP
ENSMUSG00000015656.17	Hspa8	-0.292537	10.4694	-6.90663	1.38356805620551e-05	0.000175806	2.54847	NOD2_GMTP-WT_GMTP
ENSMUSG00000032594.11	Ip6k1	0.35989	6.78018	6.90567	1.38549173424437e-05	0.00017595	2.59257	NOD2_GMTP-WT_GMTP
ENSMUSG00000089726.2	Mir17hg	-1.60503	-0.0970948	-6.90485	1.38714011968176e-05	0.000176059	3.4353	NOD2_GMTP-WT_GMTP
ENSMUSG00000020015.10	Cdk17	0.473294	4.91702	6.90009	1.39673269758727e-05	0.000177176	2.67975	NOD2_GMTP-WT_GMTP
ENSMUSG00000026694.19	Eef1aknmt	0.563523	4.03548	6.89963	1.39767400585069e-05	0.000177195	2.77605	NOD2_GMTP-WT_GMTP
ENSMUSG00000057346.12	Apol9a	-1.80128	-1.36956	-6.8934	1.41035927520292e-05	0.000178702	3.50329	NOD2_GMTP-WT_GMTP
ENSMUSG00000032279.11	Idh3a	-0.420119	4.80182	-6.88841	1.42061453302532e-05	0.000179899	2.6715	NOD2_GMTP-WT_GMTP
ENSMUSG00000027598.16	Itch	0.517444	6.98982	6.88327	1.4312497674179e-05	0.000181143	2.55208	NOD2_GMTP-WT_GMTP
ENSMUSG00000028581.17	Laptm5	0.336901	10.8762	6.88002	1.43802590266099e-05	0.000181897	2.50864	NOD2_GMTP-WT_GMTP
ENSMUSG00000029670.12	Ing3	0.461821	4.10281	6.87957	1.43896363905344e-05	0.000181913	2.7361	NOD2_GMTP-WT_GMTP
ENSMUSG00000030306.14	Tmtc1	2.84558	-3.22681	6.87684	1.44467954276832e-05	0.000182532	3.34709	NOD2_GMTP-WT_GMTP
ENSMUSG00000035246.16	Pcyt1b	0.917358	0.816195	6.87491	1.44872580983079e-05	0.00018294	3.2761	NOD2_GMTP-WT_GMTP
ENSMUSG00000039678.12	Tbc1d13	-0.323408	7.66028	-6.87218	1.45449333217601e-05	0.000183564	2.51888	NOD2_GMTP-WT_GMTP
ENSMUSG00000044583.13	Tlr7	0.537217	8.23215	6.87107	1.45685085435274e-05	0.000183758	2.50721	NOD2_GMTP-WT_GMTP
ENSMUSG00000026469.14	Xpr1	0.656423	7.40691	6.86534	1.46904178428128e-05	0.000185191	2.51387	NOD2_GMTP-WT_GMTP
ENSMUSG00000020917.17	Acly	-0.320009	7.72452	-6.86046	1.47950334179914e-05	0.000186404	2.49962	NOD2_GMTP-WT_GMTP
ENSMUSG00000085148.1	Mir22hg	-0.704629	3.63621	-6.85966	1.48122297889627e-05	0.000186515	2.77455	NOD2_GMTP-WT_GMTP
ENSMUSG00000040624.18	Plekhg1	0.764313	4.53937	6.8588	1.48308383002762e-05	0.000186644	2.65205	NOD2_GMTP-WT_GMTP
ENSMUSG00000032724.5	Abtb2	-2.02309	0.0106086	-6.85446	1.4924706726807e-05	0.00018772	3.34951	NOD2_GMTP-WT_GMTP
ENSMUSG00000021481.11	Zfp346	0.524878	3.59803	6.85322	1.49518126483159e-05	0.000187949	2.77088	NOD2_GMTP-WT_GMTP
ENSMUSG00000019139.10	Isyna1	-0.528235	5.92351	-6.85285	1.4959770823312e-05	0.000187949	2.54419	NOD2_GMTP-WT_GMTP
ENSMUSG00000037971.10	1110032A03Rik	0.621526	3.43597	6.84764	1.50736545686387e-05	0.000189273	2.78918	NOD2_GMTP-WT_GMTP
ENSMUSG00000037622.14	Wdtc1	0.361076	5.94077	6.84342	1.51665958666769e-05	0.000190333	2.52893	NOD2_GMTP-WT_GMTP
ENSMUSG00000038930.11	Rccd1	-1.45522	0.996464	-6.83644	1.53218262108713e-05	0.000192173	3.19238	NOD2_GMTP-WT_GMTP
ENSMUSG00000030067.17	Foxp1	0.385925	6.1937	6.83143	1.54341723388486e-05	0.000193473	2.49953	NOD2_GMTP-WT_GMTP
ENSMUSG00000043833.6	2900005J15Rik	-1.51903	0.328596	-6.82889	1.54914637448011e-05	0.000194083	3.27346	NOD2_GMTP-WT_GMTP
ENSMUSG00000030876.7	Mettl9	0.410239	4.63225	6.82704	1.55332876863373e-05	0.000194497	2.59376	NOD2_GMTP-WT_GMTP
ENSMUSG00000020260.9	Pofut2	-0.384881	5.62621	-6.82497	1.55804769880503e-05	0.000194979	2.51631	NOD2_GMTP-WT_GMTP
ENSMUSG00000106219.1	5830416I19Rik	0.992902	1.80302	6.82346	1.56147668522058e-05	0.00019505	3.04459	NOD2_GMTP-WT_GMTP
ENSMUSG00000020770.13	Unk	-0.374691	4.87452	-6.82336	1.56170352195594e-05	0.00019505	2.56561	NOD2_GMTP-WT_GMTP
ENSMUSG00000019370.10	Calm3	-0.39191	7.78672	-6.82336	1.56170909075452e-05	0.00019505	2.44131	NOD2_GMTP-WT_GMTP
ENSMUSG00000000149.10	Gna12	0.509768	7.77781	6.82318	1.56211066251286e-05	0.00019505	2.44121	NOD2_GMTP-WT_GMTP
ENSMUSG00000027671.14	Actl6a	-0.374887	4.80526	-6.82248	1.56370289449054e-05	0.000195139	2.57005	NOD2_GMTP-WT_GMTP
ENSMUSG00000010095.13	Slc3a2	-0.399235	8.15326	-6.81955	1.5704197334364e-05	0.000195868	2.42915	NOD2_GMTP-WT_GMTP
ENSMUSG00000042106.5	Inka1	-0.858125	2.3285	-6.81748	1.57516663923674e-05	0.00019635	2.94359	NOD2_GMTP-WT_GMTP
ENSMUSG00000045730.4	Adrb2	-1.47151	1.57638	-6.81679	1.57675266426271e-05	0.000196438	3.07217	NOD2_GMTP-WT_GMTP
ENSMUSG00000030214.7	Plbd1	0.790893	2.26642	6.81306	1.58538452259014e-05	0.000197403	2.94799	NOD2_GMTP-WT_GMTP
ENSMUSG00000042628.8	Zfyve1	0.332807	6.03412	6.81131	1.58943540585615e-05	0.000197775	2.47528	NOD2_GMTP-WT_GMTP
ENSMUSG00000011154.17	Cfap161	2.28411	-1.97404	6.81045	1.59142609099183e-05	0.000197775	3.38515	NOD2_GMTP-WT_GMTP
ENSMUSG00000032609.12	Klhdc8b	-1.14112	0.578979	-6.81029	1.59181628202639e-05	0.000197775	3.21269	NOD2_GMTP-WT_GMTP
ENSMUSG00000057531.14	Dtnbp1	0.476828	6.83555	6.81024	1.59191370210022e-05	0.000197775	2.44432	NOD2_GMTP-WT_GMTP
ENSMUSG00000001247.16	Lsr	0.814425	1.8457	6.80588	1.60210747844043e-05	0.000198931	3.0107	NOD2_GMTP-WT_GMTP
ENSMUSG00000041695.2	Kcnj2	0.577178	7.29093	6.79856	1.61936153761342e-05	0.000200961	2.41386	NOD2_GMTP-WT_GMTP
ENSMUSG00000025268.15	Maged2	-0.395154	4.48049	-6.79762	1.62157117675564e-05	0.000201124	2.56454	NOD2_GMTP-WT_GMTP
ENSMUSG00000049939.6	Lrrc4	-1.80482	-0.75425	-6.79303	1.63251271060544e-05	0.000202368	3.33092	NOD2_GMTP-WT_GMTP
ENSMUSG00000011884.13	Gltp	0.418426	8.20287	6.79154	1.6360669393858e-05	0.000202696	2.38515	NOD2_GMTP-WT_GMTP
ENSMUSG00000053963.7	Stum	1.27881	0.289721	6.78668	1.64776398393583e-05	0.000203995	3.21555	NOD2_GMTP-WT_GMTP
ENSMUSG00000021125.6	Arg2	-1.35514	-0.368897	-6.78631	1.64866167357217e-05	0.000203995	3.28888	NOD2_GMTP-WT_GMTP
ENSMUSG00000019132.11	BC005537	0.304311	9.8889	6.78604	1.64929538044543e-05	0.000203995	2.36312	NOD2_GMTP-WT_GMTP
ENSMUSG00000023966.8	Rsph9	0.873114	2.13256	6.7854	1.65086031266455e-05	0.000204076	2.92964	NOD2_GMTP-WT_GMTP
ENSMUSG00000018583.5	G3bp1	-0.383223	6.62577	-6.77253	1.68228652050164e-05	0.000207789	2.39271	NOD2_GMTP-WT_GMTP
ENSMUSG00000050410.15	Tcf19	-0.950139	2.18529	-6.77202	1.68354889946741e-05	0.000207789	2.89977	NOD2_GMTP-WT_GMTP
ENSMUSG00000030469.10	Zfp719	-0.797255	1.89883	-6.77196	1.68369677539787e-05	0.000207789	2.94998	NOD2_GMTP-WT_GMTP
ENSMUSG00000028864.7	Hgf	0.720165	5.30601	6.771	1.68607674998615e-05	0.000207968	2.45228	NOD2_GMTP-WT_GMTP
ENSMUSG00000094786.1	Gm14403	1.08029	0.716706	6.76802	1.6934562975433e-05	0.000208763	3.13011	NOD2_GMTP-WT_GMTP
ENSMUSG00000008206.16	Cers4	0.869942	2.22265	6.76529	1.70024816695673e-05	0.000209484	2.88285	NOD2_GMTP-WT_GMTP
ENSMUSG00000023965.13	Fbxl17	0.414094	4.98314	6.76419	1.70300471628476e-05	0.000209708	2.46522	NOD2_GMTP-WT_GMTP
ENSMUSG00000027173.7	Depdc7	0.600483	2.55974	6.75878	1.71657287034538e-05	0.000211262	2.81153	NOD2_GMTP-WT_GMTP
ENSMUSG00000027947.11	Il6ra	0.389235	7.01552	6.7572	1.72055937145521e-05	0.000211636	2.35707	NOD2_GMTP-WT_GMTP
ENSMUSG00000085761.1	4930455G09Rik	0.721004	2.58751	6.75631	1.72283484961147e-05	0.0002118	2.80253	NOD2_GMTP-WT_GMTP
ENSMUSG00000017756.9	Slc12a7	-0.479659	6.18003	-6.75402	1.72863201691954e-05	0.000212395	2.38051	NOD2_GMTP-WT_GMTP
ENSMUSG00000038037.5	Socs1	-1.18792	1.26628	-6.75344	1.73008946407076e-05	0.000212457	3.02594	NOD2_GMTP-WT_GMTP
ENSMUSG00000035049.4	Rrp12	-0.616243	3.59042	-6.75041	1.73782876283432e-05	0.00021329	2.61409	NOD2_GMTP-WT_GMTP
ENSMUSG00000061232.16	H2-K1	-0.462426	11.7034	-6.74981	1.73934312557323e-05	0.000213359	2.31209	NOD2_GMTP-WT_GMTP
ENSMUSG00000032180.11	Tmed1	-0.593504	3.65579	-6.74726	1.74587906062411e-05	0.000213985	2.59859	NOD2_GMTP-WT_GMTP
ENSMUSG00000026585.13	Kifap3	0.497641	5.01281	6.74698	1.74660033821102e-05	0.000213985	2.43613	NOD2_GMTP-WT_GMTP
ENSMUSG00000056209.7	Npm3	-0.476765	3.5586	-6.7467	1.74732737571853e-05	0.000213985	2.61351	NOD2_GMTP-WT_GMTP
ENSMUSG00000020021.4	Fgd6	0.72926	6.54426	6.73866	1.76809887997447e-05	0.00021641	2.34292	NOD2_GMTP-WT_GMTP
ENSMUSG00000000568.15	Hnrnpd	-0.417529	6.05199	-6.73561	1.77606452299513e-05	0.000217266	2.35736	NOD2_GMTP-WT_GMTP
ENSMUSG00000111943.1	Gm47862	1.69964	-0.758967	6.73071	1.78890715328418e-05	0.000218717	3.24042	NOD2_GMTP-WT_GMTP
ENSMUSG00000042688.16	Mapk6	0.426472	6.93356	6.72741	1.79761403987483e-05	0.000219661	2.31316	NOD2_GMTP-WT_GMTP
ENSMUSG00000066151.12	Fkbp15	0.33244	7.6474	6.7236	1.80773596702611e-05	0.000220777	2.28962	NOD2_GMTP-WT_GMTP
ENSMUSG00000038143.16	Stox2	1.61142	-0.362504	6.72151	1.81330940365038e-05	0.000221337	3.19272	NOD2_GMTP-WT_GMTP
ENSMUSG00000015461.15	Atf6b	-0.475833	6.7189	-6.72052	1.81596234610485e-05	0.000221539	2.30896	NOD2_GMTP-WT_GMTP
ENSMUSG00000028882.13	Ppp1r8	-0.423317	4.63871	-6.71936	1.8190781873313e-05	0.000221798	2.42676	NOD2_GMTP-WT_GMTP
ENSMUSG00000032530.14	Lyzl4	1.3345	0.949496	6.71552	1.82938933585444e-05	0.00022282	3.01691	NOD2_GMTP-WT_GMTP
ENSMUSG00000017802.14	Retreg3	0.301554	6.8102	6.7155	1.82945447633807e-05	0.00022282	2.29831	NOD2_GMTP-WT_GMTP
ENSMUSG00000053907.10	Mat2a	-0.399028	6.44319	-6.70994	1.84450312694777e-05	0.00022453	2.30194	NOD2_GMTP-WT_GMTP
ENSMUSG00000043664.7	Tmem221	-0.705928	3.37734	-6.70912	1.84675613853104e-05	0.000224682	2.58623	NOD2_GMTP-WT_GMTP
ENSMUSG00000028763.18	Hspg2	-1.30006	0.875802	-6.70644	1.8540493285829e-05	0.000225446	3.014	NOD2_GMTP-WT_GMTP
ENSMUSG00000042978.11	Sbk1	0.522914	3.87982	6.70603	1.85519535352477e-05	0.000225463	2.50022	NOD2_GMTP-WT_GMTP
ENSMUSG00000033400.14	Agl	0.423842	6.05964	6.70382	1.86123296738168e-05	0.000226073	2.30762	NOD2_GMTP-WT_GMTP
ENSMUSG00000005142.10	Man2b1	0.369528	10.4166	6.70212	1.86591040354424e-05	0.000226518	2.23259	NOD2_GMTP-WT_GMTP
ENSMUSG00000034413.14	Neurl1b	0.643064	2.36573	6.69627	1.88209591316898e-05	0.000228359	2.75106	NOD2_GMTP-WT_GMTP
ENSMUSG00000041220.10	Elovl6	-1.0097	1.71733	-6.68678	1.90867906496109e-05	0.000231458	2.8506	NOD2_GMTP-WT_GMTP
ENSMUSG00000009569.14	Mrtfb	0.759269	6.00112	6.68531	1.91282052014131e-05	0.000231802	2.28143	NOD2_GMTP-WT_GMTP
ENSMUSG00000025157.8	Zdhhc16	-0.581304	4.36274	-6.68504	1.91359043177432e-05	0.000231802	2.40324	NOD2_GMTP-WT_GMTP
ENSMUSG00000024247.14	Pkdcc	0.803138	3.38006	6.68435	1.91553894638967e-05	0.000231912	2.54737	NOD2_GMTP-WT_GMTP
ENSMUSG00000059810.18	Rgs3	-0.745587	3.00345	-6.68309	1.91911835597432e-05	0.00023222	2.61297	NOD2_GMTP-WT_GMTP
ENSMUSG00000038884.14	Shfl	-0.664311	2.67819	-6.6801	1.92762842061251e-05	0.000233123	2.66839	NOD2_GMTP-WT_GMTP
ENSMUSG00000021575.16	Ahrr	0.464743	5.39933	6.67259	1.94915645213065e-05	0.000235599	2.29346	NOD2_GMTP-WT_GMTP
ENSMUSG00000029552.19	Tes	-0.413579	5.06552	-6.66967	1.95758635614495e-05	0.00023649	2.312	NOD2_GMTP-WT_GMTP
ENSMUSG00000026003.5	Acadl	0.357249	6.47781	6.66647	1.96688307833227e-05	0.000237484	2.23292	NOD2_GMTP-WT_GMTP
ENSMUSG00000028943.18	Espn	1.05068	0.336019	6.66452	1.97259587921724e-05	0.000238045	3.02633	NOD2_GMTP-WT_GMTP
ENSMUSG00000062646.12	Ganc	0.492176	4.28709	6.65986	1.9862565163174e-05	0.000239564	2.37341	NOD2_GMTP-WT_GMTP
ENSMUSG00000028522.16	Mier1	0.453598	6.59528	6.65872	1.98959564219696e-05	0.000239837	2.21672	NOD2_GMTP-WT_GMTP
ENSMUSG00000090192.1	Gm16556	1.81025	-0.851	6.65468	2.00154245969756e-05	0.000241147	3.13558	NOD2_GMTP-WT_GMTP
ENSMUSG00000079173.11	Zan	1.40767	0.0162294	6.65321	2.00592141202629e-05	0.000241544	3.04952	NOD2_GMTP-WT_GMTP
ENSMUSG00000000409.14	Lck	-2.51001	-1.88987	-6.65123	2.01181399520415e-05	0.000242123	3.16384	NOD2_GMTP-WT_GMTP
ENSMUSG00000003948.17	Mmd	0.587964	4.58119	6.64792	2.02171989097427e-05	0.000243184	2.32117	NOD2_GMTP-WT_GMTP
ENSMUSG00000027940.18	Tpm3	-0.272727	9.54098	-6.64298	2.0365981208636e-05	0.000244842	2.14154	NOD2_GMTP-WT_GMTP
ENSMUSG00000059474.13	Mbtd1	0.494151	5.1874	6.63955	2.0469947988525e-05	0.000245959	2.25588	NOD2_GMTP-WT_GMTP
ENSMUSG00000022175.9	Lrp10	-0.360426	7.2479	-6.63786	2.05212063202514e-05	0.000246442	2.165	NOD2_GMTP-WT_GMTP
ENSMUSG00000053617.12	Sh3pxd2a	-0.740925	4.87159	-6.6362	2.05719430829652e-05	0.000246919	2.27551	NOD2_GMTP-WT_GMTP
ENSMUSG00000001017.15	Chtop	-0.330854	6.36042	-6.63493	2.06107917037734e-05	0.000247252	2.18786	NOD2_GMTP-WT_GMTP
ENSMUSG00000037907.16	Ankrd13b	0.496738	4.59122	6.63339	2.06580010940825e-05	0.000247685	2.29744	NOD2_GMTP-WT_GMTP
ENSMUSG00000005533.10	Igf1r	0.949469	3.4136	6.62929	2.07840517784464e-05	0.000249063	2.45586	NOD2_GMTP-WT_GMTP
ENSMUSG00000030681.18	Mvp	-0.478771	7.61952	-6.6283	2.08146803669722e-05	0.000249296	2.14143	NOD2_GMTP-WT_GMTP
ENSMUSG00000024590.8	Lmnb1	-0.668605	3.33885	-6.62596	2.0887020771711e-05	0.000250028	2.46374	NOD2_GMTP-WT_GMTP
ENSMUSG00000026023.16	Cdk15	1.26108	0.912606	6.62532	2.09071715607928e-05	0.000250135	2.88504	NOD2_GMTP-WT_GMTP
ENSMUSG00000002957.11	Ap2a2	0.362071	7.18431	6.60934	2.14098533701836e-05	0.000256012	2.12187	NOD2_GMTP-WT_GMTP
ENSMUSG00000028937.14	Acot7	-0.544221	4.64669	-6.60579	2.15232054288646e-05	0.000257229	2.24885	NOD2_GMTP-WT_GMTP
ENSMUSG00000089809.9	Rasgef1b	-0.301021	7.45395	-6.60404	2.15794381552206e-05	0.00025764	2.10701	NOD2_GMTP-WT_GMTP
ENSMUSG00000043895.6	S1pr2	-0.321426	7.42403	-6.604	2.1580668628158e-05	0.00025764	2.10761	NOD2_GMTP-WT_GMTP
ENSMUSG00000026816.14	Gtf3c5	-0.438914	4.09771	-6.60144	2.16633203427826e-05	0.000258453	2.30636	NOD2_GMTP-WT_GMTP
ENSMUSG00000023206.16	Il15ra	-0.850801	2.409	-6.60117	2.16718896397292e-05	0.000258453	2.59591	NOD2_GMTP-WT_GMTP
ENSMUSG00000024423.6	Impact	0.332393	6.42589	6.60036	2.16981954965538e-05	0.000258628	2.13126	NOD2_GMTP-WT_GMTP
ENSMUSG00000075702.9	Selenom	0.554567	4.44414	6.59804	2.17731779233238e-05	0.000259171	2.2583	NOD2_GMTP-WT_GMTP
ENSMUSG00000045573.9	Penk	0.977222	0.986074	6.59793	2.17767719707703e-05	0.000259171	2.83208	NOD2_GMTP-WT_GMTP
ENSMUSG00000045231.5	BC106179	2.70744	-2.94355	6.59788	2.17785487682072e-05	0.000259171	3.02498	NOD2_GMTP-WT_GMTP
ENSMUSG00000026281.15	Dtymk	-0.590414	3.44954	-6.59686	2.18114885790323e-05	0.000259424	2.39888	NOD2_GMTP-WT_GMTP
ENSMUSG00000069020.9	Urm1	-0.505748	5.19913	-6.59015	2.20306158344017e-05	0.000261891	2.17759	NOD2_GMTP-WT_GMTP
ENSMUSG00000035109.14	Shc4	-0.947638	0.947479	-6.58863	2.20806719964158e-05	0.000262346	2.82366	NOD2_GMTP-WT_GMTP
ENSMUSG00000028614.14	Ndc1	-0.418513	4.26728	-6.58315	2.22620147556478e-05	0.000264281	2.25589	NOD2_GMTP-WT_GMTP
ENSMUSG00000033697.16	Arhgap39	0.437684	5.05177	6.58299	2.22672280067786e-05	0.000264281	2.17732	NOD2_GMTP-WT_GMTP
ENSMUSG00000110545.1	Gm7730	-2.71341	-0.647329	-6.57833	2.24225140151849e-05	0.000265983	3.00654	NOD2_GMTP-WT_GMTP
ENSMUSG00000029994.17	Anxa4	0.292112	9.35264	6.57595	2.25025644840913e-05	0.000266791	2.03721	NOD2_GMTP-WT_GMTP
ENSMUSG00000025491.14	Ifitm1	-1.78404	-0.630669	-6.56969	2.27136177648693e-05	0.00026915	2.9922	NOD2_GMTP-WT_GMTP
ENSMUSG00000103349.1	Gm36888	-4.85543	-4.941	-6.56771	2.27808861667249e-05	0.000269804	2.60861	NOD2_GMTP-WT_GMTP
ENSMUSG00000031779.3	Ccl22	-3.63573	0.10435	-6.5667	2.28155172658781e-05	0.00027007	2.90821	NOD2_GMTP-WT_GMTP
ENSMUSG00000037852.8	Cpe	0.528794	3.81848	6.56475	2.28820647019396e-05	0.000270714	2.28908	NOD2_GMTP-WT_GMTP
ENSMUSG00000056258.9	Kcnq3	3.83222	-2.35352	6.56121	2.30035759687651e-05	0.000272008	3.02365	NOD2_GMTP-WT_GMTP
ENSMUSG00000004460.17	Dnajb11	-0.319249	7.04014	-6.55749	2.31317031542077e-05	0.000273243	2.0442	NOD2_GMTP-WT_GMTP
ENSMUSG00000023990.18	Tfeb	0.513253	6.54832	6.55747	2.31325212335296e-05	0.000273243	2.05935	NOD2_GMTP-WT_GMTP
ENSMUSG00000015968.18	Cacna1d	0.707794	4.54793	6.55158	2.33371736449201e-05	0.000275514	2.17372	NOD2_GMTP-WT_GMTP
ENSMUSG00000085058.2	8030453O22Rik	1.10398	0.746966	6.5489	2.34307478063405e-05	0.000276473	2.79272	NOD2_GMTP-WT_GMTP
ENSMUSG00000091415.5	Ak9	2.22495	-2.79572	6.54574	2.3542071580435e-05	0.00027764	2.97041	NOD2_GMTP-WT_GMTP
ENSMUSG00000037822.12	Smim14	0.360382	6.53652	6.54396	2.36048026893063e-05	0.000278232	2.03845	NOD2_GMTP-WT_GMTP
ENSMUSG00000027332.11	Ivd	0.394469	5.26513	6.54222	2.36661735386314e-05	0.000278726	2.09758	NOD2_GMTP-WT_GMTP
ENSMUSG00000051495.7	Irf2bp2	0.405815	6.67731	6.54207	2.36716373608348e-05	0.000278726	2.03079	NOD2_GMTP-WT_GMTP
ENSMUSG00000005233.16	Spc25	-0.549242	2.7263	-6.53524	2.39149724858345e-05	0.000281442	2.43403	NOD2_GMTP-WT_GMTP
ENSMUSG00000086795.1	Gm11579	2.58832	-2.68114	6.53485	2.39290235973122e-05	0.000281459	2.9657	NOD2_GMTP-WT_GMTP
ENSMUSG00000038564.11	Ift172	0.51631	5.40012	6.53241	2.40168198986963e-05	0.000282343	2.07343	NOD2_GMTP-WT_GMTP
ENSMUSG00000014905.4	Dnajb9	0.337819	5.57666	6.52924	2.41310550590557e-05	0.000283537	2.05796	NOD2_GMTP-WT_GMTP
ENSMUSG00000030978.10	Rrm1	-0.34795	5.54006	-6.52689	2.42160848027131e-05	0.000284255	2.05636	NOD2_GMTP-WT_GMTP
ENSMUSG00000118559.2	A930007A09Rik	0.925372	1.93701	6.52685	2.42177019356972e-05	0.000284255	2.56539	NOD2_GMTP-WT_GMTP
ENSMUSG00000033732.10	Sf3b3	-0.349266	6.51354	-6.52413	2.43165189291233e-05	0.000285265	2.00796	NOD2_GMTP-WT_GMTP
ENSMUSG00000087064.1	Sap30bpos	3.38288	-6.69596	6.51367	2.47012724853518e-05	0.000289627	2.13012	NOD2_GMTP-WT_GMTP
ENSMUSG00000025586.17	Cpeb1	0.556869	2.86948	6.50981	2.48450831513424e-05	0.00029116	2.36735	NOD2_GMTP-WT_GMTP
ENSMUSG00000025212.17	Sfxn3	0.372341	5.83	6.5091	2.48714032203546e-05	0.000291315	2.01269	NOD2_GMTP-WT_GMTP
ENSMUSG00000040289.8	Hey1	0.983337	2.31264	6.50782	2.49194308888873e-05	0.000291725	2.46803	NOD2_GMTP-WT_GMTP
ENSMUSG00000085823.7	Gm13012	-1.19516	0.754557	-6.50419	2.50556412750488e-05	0.000293165	2.72279	NOD2_GMTP-WT_GMTP
ENSMUSG00000054733.9	Msra	0.511167	5.0705	6.5032	2.5092669003376e-05	0.000293445	2.05012	NOD2_GMTP-WT_GMTP
ENSMUSG00000040557.14	Mettl27	0.685475	2.33956	6.50178	2.51465929614715e-05	0.000293921	2.45361	NOD2_GMTP-WT_GMTP
ENSMUSG00000004980.16	Hnrnpa2b1	-0.305941	8.94303	-6.49772	2.53003898949909e-05	0.000295548	1.91651	NOD2_GMTP-WT_GMTP
ENSMUSG00000027180.12	Fbxo3	0.294943	6.17501	6.49741	2.53122575693585e-05	0.000295548	1.97861	NOD2_GMTP-WT_GMTP
ENSMUSG00000025195.9	Dnmbp	0.449262	4.74365	6.49643	2.53494085469544e-05	0.000295827	2.06711	NOD2_GMTP-WT_GMTP
ENSMUSG00000056917.13	Sipa1	-0.376865	6.8522	-6.49294	2.54828413972398e-05	0.000297127	1.94758	NOD2_GMTP-WT_GMTP
ENSMUSG00000005470.8	Asf1b	-0.597318	3.25424	-6.49268	2.54930108073384e-05	0.000297127	2.26965	NOD2_GMTP-WT_GMTP
ENSMUSG00000046841.5	Ckap4	0.360527	4.94769	6.49247	2.55007366243296e-05	0.000297127	2.04294	NOD2_GMTP-WT_GMTP
ENSMUSG00000032872.16	Cyb5r4	0.283502	6.94066	6.4877	2.56846177939418e-05	0.000299113	1.93662	NOD2_GMTP-WT_GMTP
ENSMUSG00000005774.12	Rfx5	-0.517605	3.33522	-6.48704	2.5710062430941e-05	0.000299253	2.24646	NOD2_GMTP-WT_GMTP
ENSMUSG00000031353.13	Rbbp7	-0.346536	6.15674	-6.48515	2.57832917249602e-05	0.000299949	1.95992	NOD2_GMTP-WT_GMTP
ENSMUSG00000038740.9	Mvb12b	-0.451164	5.01537	-6.48172	2.59166775431327e-05	0.000301344	2.02024	NOD2_GMTP-WT_GMTP
ENSMUSG00000030376.8	Slc8a2	3.98074	-3.568	6.48095	2.59468302526062e-05	0.000301537	2.77465	NOD2_GMTP-WT_GMTP
ENSMUSG00000031767.13	Nudt7	0.561294	3.11934	6.47903	2.60219260075549e-05	0.000302253	2.27277	NOD2_GMTP-WT_GMTP
ENSMUSG00000032733.6	Snx33	0.433556	4.89815	6.47769	2.60745752891902e-05	0.000302707	2.02369	NOD2_GMTP-WT_GMTP
ENSMUSG00000117764.1	Gm50143	1.32357	0.977561	6.47524	2.61709298503836e-05	0.000303569	2.64417	NOD2_GMTP-WT_GMTP
ENSMUSG00000031659.13	Adcy7	0.483115	8.74423	6.47498	2.61811941178739e-05	0.000303569	1.88231	NOD2_GMTP-WT_GMTP
ENSMUSG00000020706.13	Ftsj3	-0.38436	5.50393	-6.47476	2.61896726944714e-05	0.000303569	1.9759	NOD2_GMTP-WT_GMTP
ENSMUSG00000023992.14	Trem2	0.374743	9.7818	6.47148	2.63197914584106e-05	0.000304918	1.87018	NOD2_GMTP-WT_GMTP
ENSMUSG00000024338.15	Psmb8	-0.519543	7.0266	-6.47113	2.63333763921431e-05	0.000304918	1.9079	NOD2_GMTP-WT_GMTP
ENSMUSG00000020264.5	Slc36a2	1.43746	0.714335	6.46811	2.64536413505762e-05	0.000306152	2.67303	NOD2_GMTP-WT_GMTP
ENSMUSG00000035697.14	Arhgap45	0.34358	8.35005	6.46734	2.64842131781571e-05	0.000306346	1.87488	NOD2_GMTP-WT_GMTP
ENSMUSG00000020064.9	Herc4	0.43732	6.07858	6.46699	2.64985181593082e-05	0.000306353	1.93438	NOD2_GMTP-WT_GMTP
ENSMUSG00000069114.8	Zbtb10	0.774826	1.76419	6.46655	2.65158508487872e-05	0.000306395	2.50132	NOD2_GMTP-WT_GMTP
ENSMUSG00000041729.15	Coro2b	1.86329	-0.643414	6.46607	2.65349605983818e-05	0.000306457	2.83808	NOD2_GMTP-WT_GMTP
ENSMUSG00000002897.5	Il17ra	-0.414139	5.37875	-6.46554	2.65563210213743e-05	0.000306545	1.96894	NOD2_GMTP-WT_GMTP
ENSMUSG00000026466.16	Tor1aip1	-0.308667	7.68649	-6.46309	2.66547314983343e-05	0.000307522	1.87929	NOD2_GMTP-WT_GMTP
ENSMUSG00000039787.13	Cercam	0.699307	3.46451	6.46069	2.67514044697277e-05	0.000308478	2.182	NOD2_GMTP-WT_GMTP
ENSMUSG00000093880.3	Tmem181c-ps	2.89329	-4.10667	6.45505	2.6979804113171e-05	0.000310951	2.63988	NOD2_GMTP-WT_GMTP
ENSMUSG00000051790.15	Nlgn2	-0.655152	3.11428	-6.45407	2.70197389060126e-05	0.00031125	2.23427	NOD2_GMTP-WT_GMTP
ENSMUSG00000020994.5	Pnn	-0.292227	5.61667	-6.45237	2.70892838164196e-05	0.00031189	1.93385	NOD2_GMTP-WT_GMTP
ENSMUSG00000004530.12	Coro1c	0.320954	8.19766	6.44784	2.72752127290363e-05	0.000313869	1.84604	NOD2_GMTP-WT_GMTP
ENSMUSG00000027742.13	Cog6	0.324389	5.06688	6.4467	2.73220850394368e-05	0.000314246	1.96077	NOD2_GMTP-WT_GMTP
ENSMUSG00000035678.8	Tnfsf9	-2.56748	-0.704533	-6.44599	2.7351582931239e-05	0.000314423	2.81338	NOD2_GMTP-WT_GMTP
ENSMUSG00000021978.9	Extl3	-0.460765	6.59144	-6.44211	2.75122672714317e-05	0.000316108	1.87516	NOD2_GMTP-WT_GMTP
ENSMUSG00000032119.5	Hinfp	-0.364345	4.02821	-6.43992	2.76035372870116e-05	0.000316993	2.06132	NOD2_GMTP-WT_GMTP
ENSMUSG00000023088.17	Abcc1	-0.422129	6.70324	-6.4374	2.77087064044744e-05	0.000317858	1.86396	NOD2_GMTP-WT_GMTP
ENSMUSG00000030847.8	Bag3	0.30237	5.90696	6.43715	2.77191885897706e-05	0.000317858	1.89471	NOD2_GMTP-WT_GMTP
ENSMUSG00000031765.8	Mt1	0.534904	4.85597	6.43709	2.77215683547841e-05	0.000317858	1.96278	NOD2_GMTP-WT_GMTP
ENSMUSG00000039699.14	Batf2	-0.785958	3.3267	-6.43627	2.77563176864925e-05	0.000318093	2.16765	NOD2_GMTP-WT_GMTP
ENSMUSG00000052749.9	Trim30b	-1.35179	1.7998	-6.43489	2.78143131296546e-05	0.000318594	2.44554	NOD2_GMTP-WT_GMTP
ENSMUSG00000039568.6	Ubald1	0.483301	6.30661	6.43363	2.78670105563243e-05	0.000319034	1.87196	NOD2_GMTP-WT_GMTP
ENSMUSG00000097471.8	5830432E09Rik	0.640923	3.18951	6.43144	2.79594463377552e-05	0.000319928	2.18476	NOD2_GMTP-WT_GMTP
ENSMUSG00000062075.13	Lmnb2	-0.542408	3.98159	-6.43095	2.79803422521781e-05	0.000319988	2.05356	NOD2_GMTP-WT_GMTP
ENSMUSG00000008035.12	Mid1ip1	0.442862	6.46824	6.43064	2.79934242607616e-05	0.000319988	1.86122	NOD2_GMTP-WT_GMTP
ENSMUSG00000027763.13	Mbnl1	0.477238	9.335	6.4297	2.80331967864567e-05	0.000320279	1.80556	NOD2_GMTP-WT_GMTP
ENSMUSG00000052446.17	Zfp961	-0.72575	2.41803	-6.42799	2.81057349349844e-05	0.000320943	2.32298	NOD2_GMTP-WT_GMTP
ENSMUSG00000040410.14	Fbxl4	-0.423647	3.26488	-6.42642	2.81726967351079e-05	0.000321528	2.16294	NOD2_GMTP-WT_GMTP
ENSMUSG00000031133.12	Arhgef6	0.463813	7.31059	6.42611	2.8185722920713e-05	0.000321528	1.82884	NOD2_GMTP-WT_GMTP
ENSMUSG00000057069.7	Ero1lb	0.387022	6.06891	6.42432	2.82625771525474e-05	0.000322098	1.86692	NOD2_GMTP-WT_GMTP
ENSMUSG00000019943.10	Atp2b1	0.396341	8.87794	6.42405	2.82737993231738e-05	0.000322098	1.79995	NOD2_GMTP-WT_GMTP
ENSMUSG00000029016.13	Clcn6	-0.447911	4.30032	-6.42393	2.8279003421204e-05	0.000322098	2.00013	NOD2_GMTP-WT_GMTP
ENSMUSG00000028059.16	Arhgef2	-0.279426	7.87013	-6.42321	2.83098306089023e-05	0.000322284	1.81222	NOD2_GMTP-WT_GMTP
ENSMUSG00000021814.17	Anxa7	0.295532	7.60553	6.41657	2.85961024889405e-05	0.000325377	1.80683	NOD2_GMTP-WT_GMTP
ENSMUSG00000020022.17	Ndufa12	-0.455358	4.91976	-6.41183	2.88018554706295e-05	0.000327551	1.91717	NOD2_GMTP-WT_GMTP
ENSMUSG00000034203.8	Chchd4	-0.38274	3.77898	-6.41009	2.88779820506265e-05	0.00032825	2.05066	NOD2_GMTP-WT_GMTP
ENSMUSG00000054400.16	Cklf	-0.523632	4.05915	-6.40781	2.89781499058661e-05	0.000329157	2.00593	NOD2_GMTP-WT_GMTP
ENSMUSG00000049130.6	C5ar1	0.302627	7.71349	6.4076	2.89873302154051e-05	0.000329157	1.79033	NOD2_GMTP-WT_GMTP
ENSMUSG00000053395.15	Cacng8	-5.14216	-4.44491	-6.40717	2.90062315311733e-05	0.000329204	2.51737	NOD2_GMTP-WT_GMTP
ENSMUSG00000042423.9	Fbrs	-0.323254	6.88038	-6.40587	2.90632510740421e-05	0.000329624	1.80819	NOD2_GMTP-WT_GMTP
ENSMUSG00000022686.14	B3gnt5	1.30367	0.322494	6.40566	2.90727248622678e-05	0.000329624	2.63273	NOD2_GMTP-WT_GMTP
ENSMUSG00000084331.1	Gm8163	-2.95361	-7.29063	-6.40478	2.91111534358185e-05	0.000329892	1.88039	NOD2_GMTP-WT_GMTP
ENSMUSG00000045404.16	Kcnk13	-0.302039	5.93216	-6.40298	2.91907358770114e-05	0.000330626	1.83909	NOD2_GMTP-WT_GMTP
ENSMUSG00000026471.14	Mr1	0.430349	4.6816	6.40209	2.92300859635172e-05	0.000330904	1.92332	NOD2_GMTP-WT_GMTP
ENSMUSG00000002668.8	Dennd1c	-0.393445	5.21811	-6.39501	2.95459006394673e-05	0.000334309	1.8671	NOD2_GMTP-WT_GMTP
ENSMUSG00000015312.9	Gadd45b	0.571553	6.25522	6.39362	2.96083418027118e-05	0.000334746	1.81019	NOD2_GMTP-WT_GMTP
ENSMUSG00000042903.8	Foxo4	0.368333	5.47427	6.39348	2.96144941632981e-05	0.000334746	1.84818	NOD2_GMTP-WT_GMTP
ENSMUSG00000029456.12	Acad10	0.582267	2.93079	6.39232	2.96668037911806e-05	0.000335127	2.17043	NOD2_GMTP-WT_GMTP
ENSMUSG00000059355.13	Wdr83os	-0.624089	3.46175	-6.39206	2.96782781412337e-05	0.000335127	2.07358	NOD2_GMTP-WT_GMTP
ENSMUSG00000042677.7	Zc3h12a	-0.381606	4.95291	-6.39021	2.9761822008227e-05	0.000335901	1.87986	NOD2_GMTP-WT_GMTP
ENSMUSG00000052563.13	D930048N14Rik	1.00525	1.46342	6.38102	3.01800563174706e-05	0.000340422	2.41852	NOD2_GMTP-WT_GMTP
ENSMUSG00000025366.8	Esyt1	0.356949	9.67837	6.38074	3.0192986700405e-05	0.000340422	1.72579	NOD2_GMTP-WT_GMTP
ENSMUSG00000040785.19	Ttc3	0.66015	5.4069	6.37855	3.02935989935102e-05	0.000341384	1.82849	NOD2_GMTP-WT_GMTP
ENSMUSG00000086851.1	A430108G06Rik	2.03112	-0.565055	6.37538	3.04400596917359e-05	0.000342862	2.69332	NOD2_GMTP-WT_GMTP
ENSMUSG00000030042.15	Pole4	-0.515321	4.54914	-6.37151	3.06194269560882e-05	0.000344708	1.88787	NOD2_GMTP-WT_GMTP
ENSMUSG00000037242.8	Clic4	-0.328101	9.19375	-6.36984	3.06973969133071e-05	0.000345412	1.71076	NOD2_GMTP-WT_GMTP
ENSMUSG00000031808.7	Slc27a1	0.390044	7.95895	6.36734	3.08141365031232e-05	0.00034655	1.72134	NOD2_GMTP-WT_GMTP
ENSMUSG00000041552.7	Ptchd1	-0.724872	3.45962	-6.3645	3.09478223165596e-05	0.000347878	2.03003	NOD2_GMTP-WT_GMTP
ENSMUSG00000005813.12	Metap1	-0.368362	5.11549	-6.35952	3.11830632334426e-05	0.000350346	1.81802	NOD2_GMTP-WT_GMTP
ENSMUSG00000026433.13	Rab29	0.364397	5.0805	6.35849	3.12319035410673e-05	0.000350611	1.81899	NOD2_GMTP-WT_GMTP
ENSMUSG00000034422.14	Parp14	-0.658791	9.09133	-6.35837	3.12380085478073e-05	0.000350611	1.69309	NOD2_GMTP-WT_GMTP
ENSMUSG00000037347.7	Chst7	-1.40079	0.6308	-6.35541	3.13790411231126e-05	0.000352016	2.51036	NOD2_GMTP-WT_GMTP
ENSMUSG00000025579.14	Gaa	0.393438	7.31592	6.35412	3.14404222899693e-05	0.000352528	1.71357	NOD2_GMTP-WT_GMTP
ENSMUSG00000024457.16	Trim26	-0.307878	6.20725	-6.35144	3.15692224819758e-05	0.000353794	1.74461	NOD2_GMTP-WT_GMTP
ENSMUSG00000055067.15	Smyd3	0.476907	3.6991	6.34777	3.17460758383756e-05	0.000355597	1.96356	NOD2_GMTP-WT_GMTP
ENSMUSG00000075602.10	Ly6a	-0.493212	4.07878	-6.34626	3.18195744844985e-05	0.000356072	1.9049	NOD2_GMTP-WT_GMTP
ENSMUSG00000021690.10	Jmy	0.751322	4.69239	6.34624	3.18203956206039e-05	0.000356072	1.83295	NOD2_GMTP-WT_GMTP
ENSMUSG00000097572.2	Gm26797	-1.37093	0.244086	-6.3432	3.19679015020441e-05	0.000357544	2.5467	NOD2_GMTP-WT_GMTP
ENSMUSG00000043017.9	Ptgir	0.52572	4.28285	6.34279	3.19883216448257e-05	0.000357593	1.87277	NOD2_GMTP-WT_GMTP
ENSMUSG00000000881.12	Dlg3	0.618784	3.88458	6.34189	3.20319358986129e-05	0.000357901	1.9256	NOD2_GMTP-WT_GMTP
ENSMUSG00000001911.16	Nfix	-0.571799	3.17979	-6.34058	3.20958413047417e-05	0.000358305	2.042	NOD2_GMTP-WT_GMTP
ENSMUSG00000027175.10	Tcp11l1	-0.685992	3.7749	-6.34049	3.21002293085086e-05	0.000358305	1.94022	NOD2_GMTP-WT_GMTP
[truncated: 6,041 more rows]
