# Supplementary material for: PGLYRP-1 mediated intracellular peptidoglycan detection promotes mucosal protection
Source: Research Square preprint supplement (doi:10.21203/rs.3.rs-5118704/v1), 2024-10-14
Supplement: Supplementary file 15 [file f1c935e0b57a1dbf640b3ad7.xlsx]

## Sheet: heatmap_gmtp_h_cuttree_df
Gene	Cluster
E2F2	1
CEP85	1
AGL	1
GSTM5	1
SLC45A3	1
HPCAL1	1
ALMS1	1
DNAH6	1
METTL8	1
CD200R1	1
MYLK	1
LPP	1
BMP2K	1
BDH2	1
ADCY2	1
MATR3	1
FIG4	1
REV3L	1
ARID1B	1
COX19	1
LFNG	1
DNAH11	1
CDCA7L	1
FZD1	1
TNKS	1
ADHFE1	1
IL11RA	1
ZNF462	1
SPACA9	1
PNPLA7	1
KAT6B	1
MADD	1
PTGDR2	1
AHNAK	1
ING4	1
NR2C1	1
KSR2	1
CAB39L	1
PABPN1	1
ATL1	1
PTGR2	1
DGLUCY	1
HYPK	1
TCF12	1
PAGR1	1
GSE1	1
RPAIN	1
POLR2A	1
KANSL1	1
IMPACT	1
ZNF397	1
ZNF317	1
NFIX	1
URI1	1
ACSS1	1
ASIP	1
PRKX	1
TRMT2B	1
GPR157	2
EFHD2	2
TMEM82	2
FBLIM1	2
GALE	2
HMGCL	2
SFN	2
HDAC1	2
MARCKSL1	2
KIAA1522	2
ATP6V0B	2
TTC39A	2
DHCR24	2
BCL10	2
SNX7	2
OTUD7B	2
JTB	2
PMVK	2
PYGO2	2
SLC50A1	2
LAMTOR2	2
NAXE	2
DUSP23	2
SOAT1	2
XPR1	2
C1orf21	2
LAD1	2
PLXNA2	2
FLVCR1	2
FBXO28	2
ADI1	2
GALM	2
UGP2	2
STARD7	2
IL1RL2	2
SLC20A1	2
PSD4	2
TMEM37	2
TLK1	2
NFE2L2	2
PNKD	2
STK11IP	2
ABHD5	2
ZDHHC23	2
SIAH2	2
EIF4A2	2
PCYT1A	2
KLF3	2
FAM114A1	2
TMEM144	2
MSMO1	2
GALNT7	2
FBXO8	2
MIER3	2
HMGCR	2
FBXL17	2
FEM1C	2
CDC42SE2	2
TSPAN17	2
PRELID1	2
NHP2	2
TBC1D9B	2
GCNT2	2
GFOD1	2
PPARD	2
MEA1	2
KLC4	2
TNFRSF21	2
SH3BGRL2	2
SMPD2	2
ABRACL	2
ZC3H12D	2
ACAT2	2
PACRG	2
ZFAND2A	2
SNX13	2
POR	2
DTX2	2
ABCB1	2
CYP51A1	2
ZNF800	2
SLC39A14	2
PDLIM2	2
DOCK5	2
KIF13B	2
GSR	2
SGK3	2
HEY1	2
FBXO32	2
TMEM65	2
TRIB1	2
GPAA1	2
VPS28	2
C8orf33	2
AUH	2
FAM120A	2
TBC1D2	2
CRAT	2
SSNA1	2
IDI1	2
NET1	2
XPNPEP1	2
CACUL1	2
PWWP2B	2
ARFIP2	2
TCP11L1	2
ABTB2	2
SYT7	2
MARK2	2
GPR137	2
MEN1	2
FIBP	2
CPT1A	2
CAPN5	2
SC5D	2
CMAS	2
BHLHE41	2
STK38L	2
TWF1	2
ACVR1B	2
PTGES3	2
APPL2	2
WSB2	2
AACS	2
COG3	2
C14orf119	2
FOS	2
CIPC	2
VIPAS39	2
AHSA1	2
CYFIP1	2
MTMR10	2
FMN1	2
NOP10	2
THBS1	2
FSIP1	2
SNX33	2
JPT2	2
GSPT1	2
PYCARD	2
PDP2	2
ZNRF1	2
GALNS	2
MED31	2
TMEM256	2
AKAP10	2
ACSF2	2
TEX2	2
JPT1	2
MFSD11	2
PCYT2	2
RIOK3	2
ATP8B1	2
TMEM259	2
STK11	2
TRIP10	2
CYP4F2	2
HAUS8	2
DDA1	2
ZFP36	2
CYP2S1	2
IRF2BP1	2
SLC1A5	2
AP2S1	2
PIH1D1	2
TSEN34	2
RPS9	2
RPL28	2
SNRPB	2
RALY	2
ROMO1	2
ZMYND8	2
VAPB	2
PPP1R3D	2
KREMEN1	2
FAM83F	2
SREBF2	2
GDPD2	2
SNX12	2
RNF128	2
SLC6A8	2
ACOT7	3
PARK7	3
PGD	3
C1QB	3
ZDHHC18	3
STK40	3
SLC2A1	3
LRRC42	3
PLPP3	3
GCLM	3
PFDN2	3
HSD17B7	3
CREG1	3
CTSE	3
GUK1	3
CENPO	3
SLC35F6	3
OST4	3
DHRS9	3
INPP1	3
PDE6D	3
COPS9	3
ARL8B	3
TATDN2	3
CMTM6	3
PFKFB4	3
NAA50	3
TPRA1	3
ANAPC13	3
ACOX3	3
HPSE	3
ELF2	3
LHFPL2	3
C5orf15	3
CXCL14	3
NDST1	3
DEK	3
PSMG3	3
RFC2	3
COPS6	3
HBP1	3
ST7	3
INSIG1	3
ADRA1A	3
HGSNAT	3
PDP1	3
SLC45A4	3
B4GALT1	3
CREB3	3
TLE1	3
LHX2	3
USP6NL	3
CCNY	3
ADK	3
PGAM1	3
ZDHHC16	3
EIF3A	3
MYRF	3
TMEM258	3
RPS6KA4	3
RHOD	3
FOLR1	3
TNFRSF1A	3
ZCRB1	3
SPRYD3	3
FGD6	3
LRRC63	3
ARL11	3
MGAT2	3
IQCK	3
ORAI3	3
PKD1L3	3
CDT1	3
ELP5	3
TRIM16	3
CCL8	3
TAF15	3
MSL1	3
TUBG1	3
PLIN3	3
ADGRE5	3
PAF1	3
FTL	3
NUP62	3
TPX2	3
COMT	3
NF2	3
NUP50	3
PCYT1B	3
MID1IP1	3
SYN1	3
SMIM1	4
PLEKHM2	4
PADI4	4
LCK	4
P3H1	4
PDZK1IP1	4
LRRC8C	4
VCAM1	4
PTPN22	4
PLEKHO1	4
TNFAIP8L2	4
RFX5	4
S100A1	4
KRTCAP2	4
ARHGEF2	4
B4GALT3	4
RGL1	4
KIF21B	4
PPFIA4	4
HLX	4
LYST	4
ERO1B	4
CEP170	4
NLRP3	4
DNMT3A	4
ZNF638	4
CREG2	4
IL1A	4
LIMS2	4
CCDC148	4
GPR155	4
WIPF1	4
SESTD1	4
COL3A1	4
COL5A2	4
KLF7	4
SPEG	4
HTR2B	4
COL6A3	4
MTMR14	4
ATG7	4
UBE2E2	4
CSRNP1	4
CCR5	4
GPX1	4
NT5DC2	4
MBD4	4
PLXND1	4
GYG1	4
CCNL1	4
IL12A	4
B3GALNT1	4
CCDC50	4
IDUA	4
SEL1L3	4
RBPJ	4
SHISA3	4
CXCL3	4
SDAD1	4
ART3	4
CNOT6L	4
RASGEF1B	4
ARHGAP24	4
ARHGAP10	4
TMEM154	4
SUB1	4
ITGA1	4
SNX18	4
ARRDC3	4
SLC27A6	4
RAPGEF6	4
FNIP1	4
PDLIM4	4
GNPDA1	4
SPARC	4
CREBRF	4
RAB24	4
CLK4	4
NQO2	4
JARID2	4
PRRC2A	4
AGPAT1	4
ZNF76	4
TFEB	4
RUNX2	4
AKIRIN2	4
PNRC1	4
TSPYL4	4
DSE	4
EPB41L2	4
SASH1	4
UST	4
MTHFD1L	4
PDE10A	4
GPR146	4
TTYH3	4
CARD11	4
FAM220A	4
IL6	4
IKZF1	4
BUD23	4
LAT2	4
PTPN12	4
HGF	4
TMEM243	4
GNG11	4
PPP1R35	4
SRRT	4
CPED1	4
WDR91	4
PDIA4	4
ATG9B	4
SMARCD3	4
CLN8	4
ANGPT2	4
NEIL2	4
EXTL3	4
NRG1	4
LYN	4
FABP4	4
ATP6V1C1	4
LRP12	4
TRPS1	4
DOCK8	4
DNAJB5	4
PGM5	4
TMEM252	4
GADD45G	4
LCN2	4
NTNG2	4
NOTCH1	4
CACNA1B	4
CSGALNACT2	4
SAMD8	4
BLNK	4
PSD	4
IFITM2	4
TNNI2	4
TSPAN32	4
RCN1	4
PHF21A	4
DGKZ	4
SLC39A13	4
FNBP4	4
LPXN	4
SLC15A3	4
FADS2	4
FADS1	4
VEGFB	4
EHD1	4
RELA	4
SERPINH1	4
MAP6	4
TENM4	4
PRCP	4
TULP3	4
SLC2A3	4
CLEC4A	4
KLRB1	4
CLEC1A	4
RAPGEF3	4
BIN2	4
ESYT1	4
ARHGAP9	4
KIF5A	4
LYZ	4
THAP2	4
TBC1D15	4
BTBD11	4
HCAR2	4
LHFPL6	4
HTR2A	4
EDNRB	4
COL4A1	4
ACIN1	4
SRP54	4
PTGER2	4
RTN1	4
SLC38A6	4
FUT8	4
BATF	4
IRF2BPL	4
APH1B	4
ANKDD1A	4
MAP2K1	4
CSPG4	4
RASGRF1	4
CRTC3	4
CHSY1	4
UBALD1	4
ZC3H7A	4
ARMC5	4
HERPUD1	4
TMEM208	4
TPPP3	4
IRF8	4
ZNF469	4
DERL2	4
C17orf49	4
NLGN2	4
CD68	4
CHD3	4
PIK3R5	4
NTN1	4
NATD1	4
TNS4	4
STAT5A	4
PHOSPHO1	4
COL1A1	4
TTYH2	4
NAT9	4
TMC6	4
DNAH17	4
SGSH	4
BAIAP2	4
MCRIP1	4
SEC11C	4
CCBE1	4
ARHGAP45	4
FZR1	4
SEMA6B	4
DNASE2	4
DDX39A	4
CYP4F22	4
MYO9B	4
ISYNA1	4
FXYD5	4
CD22	4
GMFG	4
SAMD4B	4
PLD3	4
C5AR2	4
LILRB3	4
LILRB4	4
CPNE1	4
MMP9	4
PTPN1	4
IFNAR1	4
POFUT2	4
DGCR6	4
SDF2L1	4
GRK3	4
CSNK1E	4
GRAP2	4
SLC9A7	4
ELK1	4
ZNF275	4
PLXNB3	4
ARHGAP4	4
